# Supplementary material for: Transcriptomic and Physiological Analyses Reveal Potential Genes Involved in Photoperiod-Regulated β-Carotene Accumulation Mechanisms in the Endocarp of Cucumber (Cucumis sativus L.) Fruit
Source: MDPI journal article supplement (doi:10.3390/ijms232012650), 2022-10-21
Supplement: s1 [file s1]

# Supplementary Materials

**Supplementary Table S1:** Statistics of Differentially Expressed Genes for all pairwise comparisons

|                  |                    | All-DEGs     | Up-reg DEGs  | Down-reg DEGs |
|------------------|--------------------|--------------|--------------|---------------|
| Short Day (XS)   | XS_40DAPvsXS_10DAP | 12721        | 6346         | 6375          |
|                  | XS_30DAPvsXS_10DAP | 12174        | 6170         | 6004          |
|                  | XS_20DAPvsXS_10DAP | 11087        | 5646         | 5441          |
|                  | XS_30DAPvsXS_20DAP | 9594         | 4806         | 4788          |
|                  | XS_40DAPvsXS_30DAP | 9002         | 4462         | 4540          |
|                  | <b>Total</b>       | <b>54578</b> | <b>27430</b> | <b>27148</b>  |
|                  |                    | all          | up           | down          |
| Day Neutral (XN) | XN_40DAPvsXN_10DAP | 6585         | 2489         | 4096          |
|                  | XN_30DAPvsXN_10DAP | 2845         | 1037         | 1808          |
|                  | XN_40DAPvsXN_30DAP | 1943         | 723          | 1220          |
|                  | XN_30DAPvsXN_20DAP | 1586         | 903          | 683           |
|                  | XN_20DAPvsXN_10DAP | 1161         | 361          | 800           |
|                  | <b>Total</b>       | <b>12959</b> | <b>5152</b>  | <b>7807</b>   |
|                  |                    | all          | up           | down          |
| XS VS XN         | XS_10DAPvsXN_10DAP | 8135         | 3556         | 4579          |
|                  | XS_40DAPvsXN_40DAP | 5541         | 2882         | 2659          |
|                  | XS_30DAPvsXN_30DAP | 3933         | 1894         | 2039          |
|                  | XS_20DAPvsXN_20DAP | 2676         | 1031         | 1645          |
|                  | <b>Total</b>       | <b>20285</b> | <b>9363</b>  | <b>10922</b>  |
|                  |                    | all          | up           | down          |
| XS VS CS         | XS_30DAPvsCS_30DAP | 10862        | 5426         | 5436          |
|                  | XS_10DAPvsCS_10DAP | 10261        | 4848         | 5413          |
|                  | XS_40DAPvsCS_40DAP | 6259         | 2633         | 3626          |
|                  | XS_20DAPvsCS_20DAP | 5049         | 1932         | 3117          |
|                  | <b>Total</b>       | <b>32431</b> | <b>14839</b> | <b>17592</b>  |
|                  |                    | all          | up           | down          |
| XN VS CS         | XN_40DAPvsCN_40DAP | 8767         | 4186         | 4581          |
|                  | XN_30DAPvsCN_30DAP | 1971         | 874          | 1097          |
|                  | XN_20DAPvsCN_20DAP | 1700         | 783          | 917           |
|                  | XN_10DAPvsCN_10DAP | 1385         | 785          | 600           |
|                  | <b>Total</b>       | <b>13823</b> | <b>6628</b>  | <b>7195</b>   |
|                  |                    | all          | up           | down          |
| Short Day (CS)   | CS_30DAPvsCS_10DAP | 7286         | 3559         | 3727          |
|                  | CS_20DAPvsCS_10DAP | 3107         | 1984         | 1123          |
|                  | CS_30DAPvsCS_20DAP | 2549         | 346          | 2203          |
|                  | CS_40DAPvsCS_30DAP | 2138         | 1779         | 359           |

# Supplementary Material

|                    |                    |              |             |             |
|--------------------|--------------------|--------------|-------------|-------------|
| CS_40DAPvsCS_10DAP |                    | 1930         | 1212        | 718         |
| <b>Total</b>       |                    | <b>17010</b> | <b>8880</b> | <b>8130</b> |
|                    |                    | all          | up          | down        |
| Day Neutral (CN)   | CN_40DAPvsCN_10DAP | 5381         | 2233        | 3148        |
|                    | CN_30DAPvsCN_20DAP | 3807         | 1774        | 2033        |
|                    | CN_40DAPvsCN_30DAP | 3468         | 1653        | 1815        |
|                    | CN_30DAPvsCN_10DAP | 2906         | 1195        | 1711        |
|                    | CN_20DAPvsCN_10DAP | 399          | 209         | 190         |
| <b>Total</b>       |                    | <b>15961</b> | <b>7064</b> | <b>8897</b> |
|                    |                    | all          | up          | down        |
| CS VS CN           | CS_30DAPvsCN_30DAP | 7816         | 3627        | 4189        |
|                    | CS_10DAPvsCN_10DAP | 4588         | 1887        | 2701        |
|                    | CS_40DAPvsCN_40DAP | 3761         | 2135        | 1626        |
|                    | CS_20DAPvsCN_20DAP | 1381         | 772         | 609         |
|                    | <b>Total</b>       | <b>17546</b> | <b>8421</b> | <b>9125</b> |

**Table S2 : The top 5 DEGs with high fold change value (absolute value) and their annotation in the pairwise comparisons**

| Gen ID         | log <sub>2</sub> FoldChange (XS vs XN_10 DAP) | Annotation                                           |
|----------------|-----------------------------------------------|------------------------------------------------------|
| CsaV3_5G034330 | 8.717070412                                   | LOB domain-containing protein, putative              |
| CsaV3_2G017980 | 7.909897915                                   | terpene synthase 10-like isoform X1                  |
| CsaV3_5G024170 | 7.53420296                                    | GAST1 protein homolog 5                              |
| CsaV3_4G001110 | 7.296776898                                   | neuronal acetylcholine receptor subunit alpha-2-like |
| CsaV3_4G005340 | 7.253750836                                   | Pectinesterase                                       |
| CsaV3_5G023030 | 7.141934098                                   | Zinc finger protein                                  |

## XS XN 20DAP

|                |             |                                                          |
|----------------|-------------|----------------------------------------------------------|
| CsaV3_7G003200 | 8.012206344 | O-methyltransferase                                      |
| CsaV3_4G025340 | 7.134123668 | Aldo-keto reductase family 4 member like                 |
| CsaV3_3G048700 | 7.122471646 | Mediator of RNA polymerase II transcription subunit like |
| CsaV3_4G010440 | 6.638066969 | Non-specific lipid-transfer protein like                 |
| CsaV3_2G027930 | 6.620749625 | calcium-binding protein-like                             |

## XS XN 30

|                 |             |                                                         |
|-----------------|-------------|---------------------------------------------------------|
| CsaV3_4G010160  | 8.684881359 | NADH-ubiquinone reductase complex 1 MLRQ                |
| CsaV3_UNG139080 | 7.386646936 | Diacylglycerol kinase family protein                    |
| CsaV3_UNG236470 | 7.091704679 | Nicotinate-nucleotide pyrophosphorylase [carboxylating] |
| CsaV3_6G014370  | 6.939211794 | Transcription factor                                    |
| CsaV3_1G033960  | 6.835024934 | p-hydroxybenzoic acid efflux pump subunit               |

## XS XN 40

|                |             |                                   |
|----------------|-------------|-----------------------------------|
| CsaV3_1G022900 | 10.43824452 | Trehalose 6-phosphate phosphatase |
|----------------|-------------|-----------------------------------|

|                |             |                                                                       |
|----------------|-------------|-----------------------------------------------------------------------|
| CsaV3_1G043750 | 9.82159882  | aluminum-activated malate transporter 2-like                          |
| CsaV3_3G019090 | 8.197122636 | nigrin b-like                                                         |
| CsaV3_6G000290 | 8.193268307 | Cytochrome P450 family protein                                        |
| CsaV3_7G018790 | 8.117529359 | Protease inhibitor/seed storage/lipid transfer protein family protein |

#### XS\_20 vs XS10DAP

|                |          |                                        |
|----------------|----------|----------------------------------------|
| CsaV3_1G028400 | 13.56626 | <b>Flavin-containing monooxygenase</b> |
| CsaV3_6G047720 | 11.80599 | Chitinase                              |
| CsaV3_5G038250 | 10.95801 | DUF1997 family protein                 |
| CsaV3_6G046880 | 10.78118 | <b>Cytochrome P450 protein</b>         |
| CsaV3_5G003140 | 9.93433  | Thaumatococcus-like protein            |
| CsaV3_5G002490 | 9.884795 | <b>Myb transcription factor</b>        |

#### XS\_30 vs XS 10DAP

|                |          |                                                  |
|----------------|----------|--------------------------------------------------|
| CsaV3_4G010160 | 12.70155 | NADH-ubiquinone reductase complex 1 MLRQ subunit |
| CsaV3_6G000230 | 12.15289 | Non-specific serine/threonine protein kinase     |
| CsaV3_5G030890 | 11.34851 | <b>Cytochrome P450</b>                           |
| CsaV3_7G008180 | 10.86775 | Glycosyltransferase                              |
| CsaV3_3G014030 | 9.064308 | <b>Sugar transporter ERD6-like</b>               |

#### XS\_40 VS XS10 DAP

|                |          |                                         |
|----------------|----------|-----------------------------------------|
| CsaV3_2G004090 | 17.85852 | Pathogenesis-related protein PR-4-like  |
| CsaV3_7G000910 | 17.24173 | protein NUCLEAR FUSION DEFECTIVE 4-like |
| CsaV3_2G035790 | 16.83134 | benzyl alcohol O-benzoyltransferase     |
| CsaV3_6G047720 | 16.70046 | Chitinase                               |
| CsaV3_7G025280 | 16.06851 | O-methyltransferase                     |
| CsaV3_1G028400 | 15.83893 | Flavin-containing monooxygenase         |

#### XS\_40 VS XS30 DAP

|                |          |                                                     |
|----------------|----------|-----------------------------------------------------|
| CsaV3_3G014770 | 9.687555 | Pollen Ole e 1 allergen/extensin                    |
| CsaV3_4G017770 | 7.961751 | TATA-binding protein associated factor-like protein |
| CsaV3_3G004250 | 7.950353 | nuclear transcription factor Y subunit B-9          |
| CsaV3_1G030170 | 7.945444 | Peroxidase                                          |

#### XN\_20 VS 10DAP

|                       |            |                                             |
|-----------------------|------------|---------------------------------------------|
| CsaV3_1G031480        | 8.44305356 | nicotianamine synthase-like                 |
| CsaV3_3G042480        | 8.08025781 | <b>polygalacturonase QRT3-like</b>          |
| CsaV3_4G000280        | 6.5465037  | Glycyl-tRNA synthetase beta subunit         |
| CsaV3_6G051190        | 6.28395822 | DUF1264 domain-containing protein           |
| CsaV3_7G030330        | 5.81060535 | short-chain dehydrogenase reductase 3b-like |
| <b>XN_30 VS 10DAP</b> |            |                                             |
| CsaV3_7G027410        | 8.26139199 | hyoscyamine 6-dioxygenase-like              |
| CsaV3_5G000680        | 7.50836067 | Bidirectional sugar transporter SWEET       |
| CsaV3_1G043200        | 7.15431662 | Cytochrome P450                             |
| CsaV3_2G004080        | 7.07481436 | pathogenesis-related protein PR-4-like      |
| CsaV3_4G000280        | 6.46865205 | Glycyl-tRNA synthetase beta subunit         |

#### XN\_30 VS XN20DAP

|  |  |  |
|--|--|--|
|  |  |  |
|  |  |  |

# Supplementary Material

|                 |                  |                                                                      |
|-----------------|------------------|----------------------------------------------------------------------|
| CsaV3_5G002380  | 9.53858152       | Endoglucanase                                                        |
| CsaV3_6G014100  | 8.87918387       | kiwellin-like                                                        |
| CsaV3_3G000680  | 8.75002341       | salicylate carboxy methyltransferase-like                            |
| CsaV3_3G044750  | 8.63126241       | cytochrome P450 CYP82D47-like                                        |
| CsaV3_4G003660  | 8.26440242       | vinorine synthase-like                                               |
|                 | XN_40_VS_XN10DAP |                                                                      |
| CsaV3_5G032410  | 10.6819958       | Pectate lyase                                                        |
| CsaV3_2G004070  | 9.60440314       | pathogenesis-related protein PR-4-like                               |
| CsaV3_7G027410  | 8.10951072       | hyoscyamine 6-dioxygenase-like                                       |
| CsaV3_5G029570  | 8.0615112        | WAT1-related protein                                                 |
| CsaV3_5G015610  | 7.99851178       | cytochrome P450 CYP736A12                                            |
| CsaV3_2G010730  | 6.92282594       | protein PHYTOCHROME KINASE SUBSTRATE 1                               |
|                 | XN40_VS_XN30 DAP |                                                                      |
| CsaV3_6G008100  | 6.50829635       | proton pump-interactor 1-like                                        |
| CsaV3_4G023650  | 6.26353379       | Peroxidase                                                           |
| CsaV3_UNG045320 | 5.49799409       | vesicle-fusing ATPase                                                |
| CsaV3_3G048100  | 5.42818155       | Rhamnogalacturonate lyase family protein                             |
| CsaV3_2G003870  | 5.33025949       | VQ motif-containing protein                                          |
|                 | XN_CN_10DAP      |                                                                      |
| CsaV3_2G001890  | 9.957394         | Phosphotransferase                                                   |
| CsaV3_2G034850  | 9.012895         | Unknown protein                                                      |
| CsaV3_3G008380  | 8.653469         | Unknown protein                                                      |
| CsaV3_2G034840  | 8.575388         | Unknown protein                                                      |
| CsaV3_4G034060  | 8.164979         | Peptidase                                                            |
|                 | XN_CN_20DAP      |                                                                      |
| CsaV3_2G001890  | 9.871831         | Phosphotransferase                                                   |
| CsaV3_4G032470  | 7.12886          | Envelope-like protein                                                |
| CsaV3_7G006630  | 7.038942         | Glycosyltransferase                                                  |
| CsaV3_3G008200  | 7.02624          | Vestitone reductase-like                                             |
| CsaV3_2G027780  | 6.950865         | Abscicic acid 8'-hydroxylase                                         |
|                 | XN-CN_30DAP      |                                                                      |
| CsaV3_2G004070  | 9.925332         | pathogenesis-related protein PR-4-like                               |
| CsaV3_4G032470  | 9.090304         | Envelope-like protein                                                |
| CsaV3_7G026270  | 8.096415         | S-RNase                                                              |
| CsaV3_2G004080  | 7.965271         | pathogenesis-related protein PR-4-like                               |
| CsaV3_1G009750  | 7.544343         | MADS-box transcription factor                                        |
|                 | XN_CN_40DAP      |                                                                      |
| CsaV3_7G008190  | 11.39395         | Glycosyltransferase                                                  |
| CsaV3_2G035770  | 10.14854         | benzyl alcohol O-benzoyltransferase                                  |
| CsaV3_2G004070  | 9.286036         | pathogenesis-related protein PR-4-like                               |
| CsaV3_3G040050  | 8.469035         | Mediator of RNA polymerase II transcription subunit 15a-like protein |
|                 | XS_10 VS_CS_10   |                                                                      |
| CsaV3_1G008950  | 9.870239         | Cytochrome P450                                                      |

|                 |                          |                                                            |
|-----------------|--------------------------|------------------------------------------------------------|
| CsaV3_4G010130  | 9.761304                 | Alpha-1,4-glucan-protein synthase [UDP-forming] 1          |
| CsaV3_2G008060  | 9.628639                 | Protein DETOXIFICATION                                     |
| CsaV3_3G005390  | 9.432539                 | Polyubiquitin                                              |
| CsaV3_1G030190  | 8.91818                  | SPX domain-containing protein                              |
|                 | <b>XS_20 CS_20DAP</b>    |                                                            |
| CsaV3_1G031480  | 11.70235                 | nicotianamine synthase-like                                |
| CsaV3_4G010130  | 11.31719                 | Alpha-1,4-glucan-protein synthase [UDP-forming] 1          |
| CsaV3_7G025710  | 10.44862                 | Unknown protein                                            |
| CsaV3_3G001850  | 10.33202                 | Seed maturation protein                                    |
|                 | <b>XS_30 CS_30DAP</b>    |                                                            |
| CsaV3_1G031480  | 14.19585                 | nicotianamine synthase-like                                |
| CsaV3_1G010260  | 11.81587                 | Ankyrin repeat-containing protein                          |
| CsaV3_1G005600  | 10.98047                 | Chlorophyll a-b binding protein, chloroplastic             |
| CsaV3_4G037920  | 10.94629                 | At4g19430                                                  |
| CsaV3_4G010130  | 10.65566                 | Alpha-1,4-glucan-protein synthase [UDP-forming] 1          |
| CsaV3_4G010160  | 10.39904                 | NADH-ubiquinone reductase complex 1 MLRQ subunit           |
|                 | <b>XS_40 CS40DAP</b>     |                                                            |
| CsaV3_2G035790  | 12.8891                  | benzyl alcohol O-benzoyltransferase                        |
| CsaV3_5G014070  | 12.8694                  | Oxidoreductase, short chain dehydrogenase/reductase family |
| CsaV3_1G030190  | 11.8613                  | SPX domain-containing protein                              |
| CsaV3_2G004090  | 11.4109                  | pathogenesis-related protein PR-4-like                     |
| CsaV3_1G030210  | 10.9208                  | Cytochrome P450 family protein                             |
|                 | <b>CS_20VS_10DAP</b>     |                                                            |
| CsaV3_3G042160  | 9.112987                 | WAT1-related protein                                       |
| CsaV3_5G011080  | 8.936047                 | WRKY protein                                               |
| CsaV3_7G002980  | 8.78654                  | Pathogen-induced protein CuPi1                             |
| CsaV3_1G044780  | 8.304662                 | Glucan endo-1,3-beta-glucosidase                           |
| CsaV3_5G000830  | 8.087867                 | Acidic endochitinase                                       |
| CsaV3_5G037570  | 7.957281                 | metalloendoproteinase 2-MMP-like                           |
|                 | <b>CS_30_vs_CS10DAP</b>  |                                                            |
| CsaV3_6G019010  | 9.040795                 | <b>Peroxidase</b>                                          |
| CsaV3_6G039720  | 8.964182                 | <b>Phenylalanine ammonia-lyase</b>                         |
| CsaV3_3G036250  | 7.975705                 | thaumatin-like protein 1b                                  |
| CsaV3_3G044690  | 7.376858                 | Cytochrome P450                                            |
| CsaV3_3G014160  | 7.200929                 | CASP-like protein                                          |
| CsaV3_2G004090  | 7.148448                 | pathogenesis-related protein PR-4-like                     |
|                 | <b>CS_30 VS_CS_20DAP</b> |                                                            |
| CsaV3_7G029080  | 6.990286                 | <b>desiccation-related protein PCC13-62-like</b>           |
| CsaV3_2G031980  | 6.532487                 | EG45-like domain containing protein                        |
| CsaV3_6G052960  | 5.312135                 | alpha 1,4-glycosyltransferase family protein               |
| CsaV3_UNG045320 | 5.025615                 | vesicle-fusing ATPase                                      |
| CsaV3_1G043590  | 4.808247                 | Myb/SANT-like DNA-binding domain protein                   |
|                 | <b>CS40 VS_CS10DAP</b>   |                                                            |
| CsaV3_3G042160  | 8.29772                  | WAT1-related protein                                       |

Supplementary Material

|                 |                   |                                                 |
|-----------------|-------------------|-------------------------------------------------|
| CsaV3_5G011080  | 8.07481           | WRKY protein                                    |
| CsaV3_7G030280  | 7.48475           | Protein nim1-interacting 1                      |
| CsaV3_6G039720  | 7.36969           | <b>Phenylalanine ammonia-lyase</b>              |
| CsaV3_5G001480  | 7.27209           | Protein DMR6-LIKE OXYGENASE 2-like              |
| CsaV3_6G042280  | 7.17608           | WRKY family transcription factor                |
|                 | CS_40 VS CS_30DAP |                                                 |
| CsaV3_1G005600  | 7.84857           | Chlorophyll a-b binding protein, chloroplastic  |
| CsaV3_1G009380  | 7.05494           | vinorine synthase-like                          |
| CsaV3_1G038410  | 7.03947           | F-box protein like                              |
| CsaV3_6G045990  | 6.98145           | UDP-glycosyltransferase 72E1                    |
| CsaV3_3G039970  | 6.93256           | WAT1-related protein                            |
| CsaV3_2G035510  | 6.90032           | Glycosyltransferase                             |
|                 | CN_20VS-CN 10DAP  |                                                 |
| CsaV3_4G010440  | 6.312347          | Non-specific lipid-transfer protein like        |
| CsaV3_UNG071590 | 6.240674          | Malic enzyme                                    |
| CsaV3_5G033430  | 5.987218          | Cytochrome P450                                 |
| CsaV3_5G008230  | 5.836786          | Glycerol-3-phosphate acyltransferase            |
| CsaV3_2G008150  | 5.80238           | (R)-mandelonitrile lyase 1-like                 |
|                 | CN_30_VS_CN10DAP  |                                                 |
| CsaV3_2G028090  | 7.873468          | Alpha/beta hydrolase-3                          |
| CsaV3_3G036260  | 7.77962           | Thaumatococcus                                  |
| CsaV3_3G021910  | 7.678506          | cation/H (+) antiporter 4-like                  |
| CsaV3_2G030870  | 7.444523          | <b>Carotenoid cleavage dioxygenase</b>          |
|                 | CN_30VS_CN20DAP   |                                                 |
| CsaV3_6G047050  | 7.760112          | protein WUSCHEL                                 |
| CsaV3_1G015130  | 7.043541          | NAC domain containing protein                   |
| CsaV3_1G046290  | 6.952583          | Protein EXORDIUM-like                           |
| CsaV3_3G039060  | 6.943206          | Cytochrome P450, putative                       |
| CsaV3_6G014480  | 6.829094          | Carboxypeptidase                                |
| CsaV3_2G030870  | 6.567486          | <b>Carotenoid cleavage dioxygenase</b>          |
|                 | CN_40VS CN_10     |                                                 |
| CsaV3_2G023210  | 9.476417          | <b>Lipoxygenase</b>                             |
| CsaV3_3G010420  | 8.499599          | Pectinesterase inhibitor                        |
| CsaV3_3G026530  | 8.22522           | Gibberellin 2-beta-dioxygenase 2                |
| CsaV3_6G006140  | 8.160713          | LOB domain-containing protein 19                |
|                 | CN_40VS CN_20     |                                                 |
| CsaV3_1G005600  | 7.848574          | Chlorophyll a-b binding protein, chloroplastic  |
| CsaV3_1G009380  | 7.054937          | Vinorine synthase-like                          |
| CsaV3_1G038410  | 7.039469          | F-box protein like                              |
| CsaV3_6G045990  | 6.981452          | UDP-glycosyltransferase 72E1                    |
| CsaV3_2G035510  | 6.900316          | Glycosyltransferase                             |
| CsaV3_6G003270  | 6.835252          | Cellulase (glycosyl hydrolase family 5) protein |

|                |          |                                    |
|----------------|----------|------------------------------------|
| CsaV3_5G001480 | 6.789136 | protein DMR6-LIKE OXYGENASE 2-like |
| CsaV3_2G013640 | 6.7556   | chlorophyllase-1-like              |
| CsaV3_2G009640 | 6.718194 | ABC transporter B family protein   |

**Supplementary Table S3: Primer sequences used for qRT-PCR**

| Gene Name                | Gene ID        | Primer sequences           |                           | Full length sequence | Product Size (bp) | Tm (°C) F/R |
|--------------------------|----------------|----------------------------|---------------------------|----------------------|-------------------|-------------|
|                          |                | Forward primer (5'→3')     | Reverse primer (5'→3')    |                      |                   |             |
| <i>CsaPSY1</i>           | CsaV3_5G020340 | TTCATCGTTAGTTGTTTCTC<br>CC | ATTCCCCCACTTCTGTCTCT      | 1266                 | 157               | 56.5/54.9   |
| <i>CsaPdsA</i>           | CsaV3_4G002690 | GTTACAGCCGATTGATTCC<br>C   | CGACTTCTCATCCACTCTTG<br>C | 1731                 | 195               | 61.1/57.2   |
| <i>CsaZDs</i>            | CsaV3_1G045650 | CAATGGAGAGAATGGGAG<br>TT   | CAATGGAGAGAATGGGAGT<br>T  | 1587                 | 170               | 53.8/54.8   |
| <i>CsaLCY-ε</i>          | CsaV3_2G001370 | ATTACGGAAACTGCCACT         | ACCTCAACCTCCACACCA        | 1602                 | 170               | 49.8/52.8   |
| <i>CsaLCYβ2</i>          | CsaV3_4G000740 | CCCAACATTCTCTACGCA         | TCTCTTCACCTTTATCCCC       | 1416                 | 148               | 56.5/51.2   |
| <i>CsaCHYβ1</i>          | CsaV3_3G017450 | GAGTCGCATCATAAACCAA        | CCATCCCCAAGACCGTAA        | 933                  | 166               | 51.3/53.6   |
| <i>CsaCHYβ2</i>          | CsaV3_5G002520 | AAGAAAGCAGAAAGAGAG<br>GG   | GGGAAGAGAAACGGTAATA<br>A  | 867                  | 100               | 53.2/51.7   |
| <i>CsaZEP</i>            | CsaV3_2G016630 | ACCGTGTGTTTTTGGGAC         | CAGAATCTTCATCAGTGGC       | 1998                 | 198               | 53/50.2     |
| <i>CsaOre</i>            | CsaV3_6G040750 | GCCTTATTGCCCCAACTCT<br>G   | ATGACACCTACCGCTCCACC      | 975                  | 145               | 59.7/59.5   |
| <i>CsaCRY1</i>           | CsaV3_3G047490 | GCCAATGAAGGAAACAAA<br>G    | ACAACCCAGGGGAAGAAT        | 1839                 | 152               | 49.5/50.9   |
| <i>CsaPHYB</i>           | CsaV3_3G015190 | CCTCTCCAGTTCGTGTAA         | AAGCCTTGTTGAGTTTCG        | 3399                 | 194               | 47.7/50.5   |
| <i>CsaLHY-Like</i>       | CsaV3_6G008360 | GGACTGCTACCTTTGTGTG        | TGTTGGGAACCTTTCTGCTT      | 2202                 | 128               | 50.4/52.8   |
| <i>CsaFlavin binding</i> | CsaV3_5G014370 | CTGTATGATTGAAGGGTC         | ATGTTGGCTTGTCTGTTGT       | 1890                 | 107               | 50.6/50.1   |
| <i>CsaAPRR7</i>          | CsaV3_4G024430 | TGAACCATAAAACGAGGA<br>AG   | CTAAAAAATCAACAGCACC<br>C  | 2385                 | 105               | 53/52.8     |

Tables S4. Top 25 Hub Genes Identified in the dark turquoise Module

| Gene IDs        | KME      | Gene Annotation                                                            |
|-----------------|----------|----------------------------------------------------------------------------|
| CsaV3_2G034330  | 81.20932 | CYC02 protein-like isoform X1                                              |
| CsaV3_1G044120  | 80.57315 | Jasmonate induced protein                                                  |
| CsaV3_2G004190  | 80.57315 | Calmodulin                                                                 |
| CsaV3_3G004290  | 80.57315 | Nuclear transcription factor Y subunit B                                   |
| CsaV3_3G020200  | 80.57315 | Core-2/I-branching beta-1,6-N-acetylglucosaminyltransferase family protein |
| CsaV3_3G048570  | 80.57315 | carotenoid 9,10(9',10')-cleavage dioxygenase 1-like isoform X1             |
| CsaV3_4G003990  | 80.57315 | Aldo/keto reductase                                                        |
| CsaV3_4G008650  | 80.57315 | Pol polyprotein                                                            |
| CsaV3_4G017690  | 80.57315 | Retrovirus-related Pol polyprotein from transposon TNT 1-94                |
| CsaV3_4G026450  | 80.57315 | Myb family transcription factor                                            |
| CsaV3_5G003480  | 80.57315 | Subtilisin-like protease                                                   |
| CsaV3_5G004070  | 80.57315 | 14 kDa proline-rich protein DC2.15-like                                    |
| CsaV3_5G005120  | 80.57315 | LRR receptor-like kinase                                                   |
| CsaV3_5G013890  | 80.57315 | Non-specific lipid-transfer protein                                        |
| CsaV3_5G026590  | 80.57315 | Cysteine/Histidine-rich C1 domain family protein                           |
| CsaV3_6G003610  | 80.57315 | Phosphate transporter                                                      |
| CsaV3_6G037670  | 80.57315 | Late embryogenesis abundant protein                                        |
| CsaV3_7G007320  | 80.57315 | E3 ubiquitin-protein ligase                                                |
| CsaV3_7G032980  | 80.57315 | Acyl-[acyl-carrier-protein] hydrolase                                      |
| CsaV3_UNG086680 | 80.57315 | Methyl-CpG-binding domain-containing protein                               |
| CsaV3_UNG185410 | 80.57315 | Zinc finger CCHC-type and RNA-binding motif-containing protein 1           |
| CsaV3_UNG187480 | 80.57315 | tRNA (Guanine(10)-N2)-methyltransferase homolog                            |
| CsaV3_UNG230070 | 80.57315 | Beta-glucosidase                                                           |
