# Supplementary material for: Transcriptomic and Physiological Analyses Reveal Potential Genes Involved in Photoperiod-Regulated β-Carotene Accumulation Mechanisms in the Endocarp of Cucumber (Cucumis sativus L.) Fruit
Source: Int J Mol Sci. 2022 Oct 21;23(20):12650. doi: 10.3390/ijms232012650 (PMC9604348; doi:10.3390/ijms232012650)
Supplement: Supplementary file 1 [file ijms-23-12650-s001.zip]

Archive with 11 entries (11 files):
- 1. Additional file 1_Tables.pdf
- 2. Additional File 2_Figures.pdf
- Supplementary Datasheet S1_Statistics of reads generated by transcriptome sequencing high-throughput.xlsx
- Supplementary Datasheet S2_GO enrichment analysis of differentially expressed genes between XS_vs XN  pairwise comparisons.xlsx
- Supplementary Datasheet S3_GO enrichment within XS and XN timepoints.xlsx
- Supplementary Datasheet S4_KEGG enrichment analysis of differentially expressed genes between XS_vs XN  pairwise comparisons.xlsx
- Supplementary datasheet S5_KEGG of DEGs between genotypes within specific photoperiod condition.xlsx
- Supplementary Datasheet S6_ DEGs related to carotenoid metabolism, chlorophyll metabolism, Photosynthesis , light and circadian signaling.xlsx
- Supplementary Datasheet S7_ Statistics of WGCNA modules and associated DEGs.xlsx
- Supplementary Datasheet S8_GO enrichments DEGs  within specific WGCNA modules.xlsx
- Supplementary Datasheet S9_KEGG Enrichment in the  Turquoise Module for Module-Phenotype Co-expression.xls
