# Supplementary material for: Transcriptomic and Physiological Analyses Reveal Potential Genes Involved in Photoperiod-Regulated β-Carotene Accumulation Mechanisms in the Endocarp of Cucumber (Cucumis sativus L.) Fruit
Source: Int J Mol Sci. 2022 Oct 21;23(20):12650. doi: 10.3390/ijms232012650 (PMC9604348; doi:10.3390/ijms232012650)
Supplement: Supplementary file 1 [file ijms-23-12650-s001.zip › Supplementary Datasheet S1_Statistics of reads generated by transcriptome sequencing high-throughput.xlsx]

## Sheet: Sequencing statistics 
	High-throughput sequencing obtained 309.22Gb raw data and 2143527430 reads totally. 2061381322 clean reads (96.17% of raw reads) were identified after quality filter, each library contains from 38.6 to 46.9 million reads and the average clean reads were 42.94 million reads. Further, 96.79%-97.87% (average 97.43%) clean reads could be mapped exactly onto cucumber reference genome while the unique-…
sample	library	raw_reads	clean_reads	clean+E1:F40_bases	error_rate	Q20	Q30	GC_%	Total_mapped	unique_map	multi_map
CN_10DAP_1	FRAS210045986-1r	39946758	38711762	5.81G	0.02	98.61	95.42	43.36	37705601(97.4%)	36543258(94.4%)	1162343(3.0%)
CN_10DAP_2	FRAS210045987-1r	45154928	43389622	6.51G	0.02	98.47	95.18	41.94	42006948(96.81%)	40796538(94.02%)	1210410(2.79%)
CN_10DAP_3	FRAS210045988-1r	46267198	44380558	6.66G	0.02	98.5	95.22	42.73	43119698(97.16%)	41860114(94.32%)	1259584(2.84%)
CN_20DAP_1	FRAS210045990-1r	48524224	46497094	6.97G	0.02	98.41	94.97	43.62	45273374(97.37%)	43918886(94.46%)	1354488(2.91%)
CN_20DAP_2	FRAS210045991-1r	47454662	45113554	6.77G	0.02	98.53	95.31	43.63	43797045(97.08%)	42471635(94.14%)	1325410(2.94%)
CN_20DAP_3	FRAS210045992-1r	46472066	44249672	6.64G	0.02	98.33	94.73	43.08	43099800(97.4%)	41852934(94.58%)	1246866(2.82%)
CN_30DAP_1	FRAS210045940-1r	48802900	47613336	7.14G	0.02	98.43	94.89	43.68	46356476(97.36%)	44947206(94.4%)	1409270(2.96%)
CN_30DAP_2	FRAS210045941-1r	40842762	39794708	5.97G	0.02	98.41	94.84	43.49	38734525(97.34%)	37509561(94.26%)	1224964(3.08%)
CN_30DAP_3	FRAS210045942-1r	41898874	40747796	6.11G	0.02	98.65	95.52	43.44	39713437(97.46%)	38475283(94.42%)	1238154(3.04%)
CN_40DAP_1	FRAS210045936-1r	40519536	39460482	5.92G	0.02	98.64	95.41	43.34	38634204(97.91%)	37381844(94.73%)	1252360(3.17%)
CN_40DAP_2	FRAS210045937-1r	40382982	38618414	5.79G	0.02	98.53	95.22	43.39	37711218(97.65%)	36484236(94.47%)	1226982(3.18%)
CN_40DAP_3	FRAS210045938-1r	44447054	42609662	6.39G	0.02	98.48	95.09	43.54	41668060(97.79%)	40389091(94.79%)	1278969(3.0%)
CS_10DAP_1	FRAS210045948-1r	46496866	44439260	6.67G	0.02	98.52	95.22	43.48	43465684(97.81%)	42168860(94.89%)	1296824(2.92%)
CS_10DAP_2	FRAS210045949-1r	43043986	41176840	6.18G	0.02	98.58	95.32	43.32	40266300(97.79%)	38982701(94.67%)	1283599(3.12%)
CS_10DAP_3	FRAS210045950-1r	45544254	44461974	6.67G	0.02	98.51	95.14	43.27	43465414(97.76%)	42128081(94.75%)	1337333(3.01%)
CS_20DAP_1	FRAS210045998-1r	42935600	41598820	6.24G	0.02	98.4	94.86	43.27	40516646(97.4%)	39284443(94.44%)	1232203(2.96%)
CS_20DAP_2	FRAS210045999-1r	42462970	41020534	6.15G	0.02	98.46	95.06	43.52	40085152(97.72%)	38870151(94.76%)	1215001(2.96%)
CS_20DAP_3	FRAS210046000-1r	41341852	40051588	6.01G	0.02	98.56	95.28	42.49	39122433(97.68%)	37778325(94.32%)	1344108(3.36%)
CS_30DAP_1	FRAS210045952-1r	44506374	42887296	6.43G	0.02	98.56	95.28	42.71	41834337(97.54%)	40292734(93.95%)	1541603(3.59%)
CS_30DAP_2	FRAS210045953-1r	42200104	40189402	6.03G	0.02	98.61	95.4	42.55	39258561(97.68%)	37827943(94.12%)	1430618(3.56%)
CS_30DAP_3	FRAS210045954-2r	46039850	45564874	6.83G	0.03	97.84	93.62	42.97	44459277(97.57%)	43009069(94.39%)	1450208(3.18%)
CS_40DAP_1	FRAS210046002-1r	43601622	41662234	6.25G	0.02	98.45	94.98	43.25	40362678(96.88%)	38998638(93.61%)	1364040(3.27%)
CS_40DAP_2	FRAS210046003-1r	41757790	39915100	5.99G	0.02	98.51	95.12	42.75	39013484(97.74%)	37685697(94.41%)	1327787(3.33%)
CS_40DAP_3	FRAS210046004-1r	46904748	45207356	6.78G	0.02	98.52	95.17	43.51	44043318(97.43%)	42465790(93.94%)	1577528(3.49%)
XN_10DAP_1	FRAS210046010-1r	48785578	46985044	7.05G	0.02	98.42	94.9	43.22	45689050(97.24%)	44281513(94.25%)	1407537(3.0%)
XN_10DAP_2	FRAS210046011-1r	46642786	44497948	6.67G	0.02	98.52	95.22	42.61	43373941(97.47%)	42127432(94.67%)	1246509(2.8%)
XN_10DAP_3	FRAS210046012-1r	48640758	46580272	6.99G	0.02	98.52	95.26	43.2	45567752(97.83%)	44291685(95.09%)	1276067(2.74%)
XN_20DAP_1	FRAS210046006-1r	45448840	43323692	6.5G	0.02	98.49	95.2	43.1	42211249(97.43%)	40949139(94.52%)	1262110(2.91%)
XN_20DAP_2	FRAS210046007-1r	43554484	41795050	6.27G	0.02	98.43	94.94	42.96	40683742(97.34%)	39565454(94.67%)	1118288(2.68%)
XN_20DAP_3	FRAS210046008-1r	43771738	41966812	6.3G	0.02	98.43	94.99	43.13	40618968(96.79%)	39242955(93.51%)	1376013(3.28%)
XN_30DAP_1	FRAS210046014-1r	48105318	46218756	6.93G	0.02	98.44	94.92	43.55	44954027(97.26%)	43347117(93.79%)	1606910(3.48%)
XN_30DAP_2	FRAS210046015-1r	44102158	41801474	6.27G	0.02	98.55	95.29	43.58	40652419(97.25%)	39282948(93.98%)	1369471(3.28%)
XN_30DAP_3	FRAS210046016-1r	44223324	42520452	6.38G	0.02	98.55	95.29	43.1	41513083(97.63%)	40235429(94.63%)	1277654(3.0%)
XN_40DAP_1	FRAS210046018-1r	45111408	43403678	6.51G	0.02	98.58	95.36	43.74	42412051(97.72%)	40965135(94.38%)	1446916(3.33%)
XN_40DAP_2	FRAS210046019-1r	44742144	42565056	6.38G	0.02	98.47	95.07	43.83	41536577(97.58%)	39975152(93.92%)	1561425(3.67%)
XN_40DAP_3	FRAS210046020-1r	45749236	43791670	6.57G	0.02	98.64	95.5	43.61	42735014(97.59%)	41159024(93.99%)	1575990(3.6%)
XS_10DAP_1	FRAS210045932-1r	47613618	46057892	6.91G	0.02	98.5	95.08	43.65	44840566(97.36%)	43491737(94.43%)	1348829(2.93%)
XS_10DAP_2	FRAS210045933-1r	47852964	46449054	6.97G	0.02	98.58	95.3	43.52	45083672(97.06%)	43711775(94.11%)	1371897(2.95%)
XS_10DAP_3	FRAS210045934-1r	42452890	41340994	6.2G	0.02	98.52	95.1	43.56	40307632(97.5%)	39105490(94.59%)	1202142(2.91%)
XS_20DAP_1	FRAS210045944-1r	40750566	39040412	5.86G	0.02	98.46	95.01	43.34	37950207(97.21%)	36823210(94.32%)	1126997(2.89%)
XS_20DAP_2	FRAS210045945-1r	45226400	44082398	6.61G	0.02	98.47	95.01	43.25	42862164(97.23%)	41613819(94.4%)	1248345(2.83%)
XS_20DAP_3	FRAS210045946-1r	46248092	44937936	6.74G	0.02	98.6	95.37	43.14	43746121(97.35%)	42423572(94.4%)	1322549(2.94%)
XS_30DAP_1	FRAS210045928-1r	45657502	43697040	6.55G	0.02	98.52	95.25	43.69	42396731(97.02%)	41123145(94.11%)	1273586(2.91%)
XS_30DAP_2	FRAS210045929-1r	50836702	49036246	7.36G	0.02	98.25	94.64	43.57	47424615(96.71%)	45972628(93.75%)	1451987(2.96%)
XS_30DAP_3	FRAS210045930-1r	42047450	40849872	6.13G	0.02	98.36	94.81	43.5	39660493(97.09%)	38450701(94.13%)	1209792(2.96%)
XS_40DAP_1	FRAS210046022-1r	44029278	41886412	6.28G	0.02	98.57	95.33	43.34	40994581(97.87%)	39497863(94.3%)	1496718(3.57%)
XS_40DAP_2	FRAS210046023-1r	41976582	39656534	5.95G	0.02	98.62	95.44	43.18	38767191(97.76%)	37469221(94.48%)	1297970(3.27%)
XS_40DAP_3	FRAS210046024-1r	42407654	39534690	5.93G	0.02	98.61	95.48	42.87	38608233(97.66%)	37221627(94.15%)	1386606(3.51%)
Total		2143527430	2061381322	309.22GB
