# Supplementary material for: Transcriptomic and Physiological Analyses Reveal Potential Genes Involved in Photoperiod-Regulated β-Carotene Accumulation Mechanisms in the Endocarp of Cucumber (Cucumis sativus L.) Fruit
Source: Int J Mol Sci. 2022 Oct 21;23(20):12650. doi: 10.3390/ijms232012650 (PMC9604348; doi:10.3390/ijms232012650)
Supplement: Supplementary file 1 [file ijms-23-12650-s001.zip › Supplementary Datasheet S2_GO enrichment analysis of differentially expressed genes between XS_vs XN pairwise comparisons.xlsx]

## Sheet: XS_10VSXN_10DAP GO
			XS_10vsXN_10DAP
Category	GOID	Description	GeneRatio	BgRatio	pvalue	padj	geneID	geneName	Count	Up	Up_Gene_id	Down	Down_Gene_id
BP	GO:0006412	translation	183/2462	267/5903	1.25142e-19	4.33507e-17	CsaV3_7G021830/CsaV3_3G015690/CsaV3_4G004050/CsaV3_1G010160/CsaV3_4G032830/CsaV3_5G039260/CsaV3_6G050830/CsaV3_5G013970/CsaV3_1G014590/CsaV3_3G040630/CsaV3_3G019240/CsaV3_4G009970/CsaV3_3G005110/CsaV3_3G020570/CsaV3_3G032940/CsaV3_3G004770/CsaV3_5G005100/CsaV3_6G016380/CsaV3_6G046990/CsaV3_7G003660/CsaV3_4G031960/CsaV3_4G008900/CsaV3_1G032830/CsaV3_6G021530/CsaV3_7G029290/CsaV3_3G035460/CsaV3_3G0…	CsaV3_7G021830/CsaV3_3G015690/CsaV3_4G004050/CsaV3_1G010160/CsaV3_4G032830/CsaV3_5G039260/CsaV3_6G050830/CsaV3_5G013970/CsaV3_1G014590/CsaV3_3G040630/CsaV3_3G019240/CsaV3_4G009970/CsaV3_3G005110/CsaV3_3G020570/CsaV3_3G032940/CsaV3_3G004770/CsaV3_5G005100/CsaV3_6G016380/CsaV3_6G046990/CsaV3_7G003660/CsaV3_4G031960/CsaV3_4G008900/CsaV3_1G032830/CsaV3_6G021530/CsaV3_7G029290/CsaV3_3G035460/CsaV3_3G0…	183	171	CsaV3_3G015690/CsaV3_4G004050/CsaV3_1G010160/CsaV3_4G032830/CsaV3_5G039260/CsaV3_6G050830/CsaV3_5G013970/CsaV3_1G014590/CsaV3_3G040630/CsaV3_3G019240/CsaV3_4G009970/CsaV3_3G020570/CsaV3_3G032940/CsaV3_3G004770/CsaV3_5G005100/CsaV3_6G016380/CsaV3_6G046990/CsaV3_7G003660/CsaV3_4G031960/CsaV3_4G008900/CsaV3_1G032830/CsaV3_6G021530/CsaV3_7G029290/CsaV3_3G035460/CsaV3_3G031360/CsaV3_5G010880/CsaV3_7G0…	12	CsaV3_7G021830/CsaV3_3G005110/CsaV3_4G036580/CsaV3_7G003720/novel.992/CsaV3_1G023010/CsaV3_2G007620/CsaV3_1G028950/CsaV3_4G002110/CsaV3_2G015740/CsaV3_6G003670/CsaV3_5G026430
BP	GO:0006518	peptide metabolic process	188/2462	277/5903	2.09424e-19	4.33507e-17	CsaV3_7G021830/CsaV3_3G015690/CsaV3_4G004050/CsaV3_1G010160/CsaV3_4G032830/CsaV3_5G039260/CsaV3_6G050830/CsaV3_5G013970/CsaV3_1G014590/CsaV3_3G040630/CsaV3_3G019240/CsaV3_4G009970/CsaV3_3G005110/CsaV3_3G020570/CsaV3_3G032940/CsaV3_3G004770/CsaV3_5G005100/CsaV3_6G016380/CsaV3_6G046990/CsaV3_7G003660/CsaV3_4G031960/CsaV3_3G047480/CsaV3_4G008900/CsaV3_1G032830/CsaV3_6G021530/CsaV3_7G029290/CsaV3_3G0…	CsaV3_7G021830/CsaV3_3G015690/CsaV3_4G004050/CsaV3_1G010160/CsaV3_4G032830/CsaV3_5G039260/CsaV3_6G050830/CsaV3_5G013970/CsaV3_1G014590/CsaV3_3G040630/CsaV3_3G019240/CsaV3_4G009970/CsaV3_3G005110/CsaV3_3G020570/CsaV3_3G032940/CsaV3_3G004770/CsaV3_5G005100/CsaV3_6G016380/CsaV3_6G046990/CsaV3_7G003660/CsaV3_4G031960/CsaV3_3G047480/CsaV3_4G008900/CsaV3_1G032830/CsaV3_6G021530/CsaV3_7G029290/CsaV3_3G0…	188	173	CsaV3_3G015690/CsaV3_4G004050/CsaV3_1G010160/CsaV3_4G032830/CsaV3_5G039260/CsaV3_6G050830/CsaV3_5G013970/CsaV3_1G014590/CsaV3_3G040630/CsaV3_3G019240/CsaV3_4G009970/CsaV3_3G020570/CsaV3_3G032940/CsaV3_3G004770/CsaV3_5G005100/CsaV3_6G016380/CsaV3_6G046990/CsaV3_7G003660/CsaV3_4G031960/CsaV3_4G008900/CsaV3_1G032830/CsaV3_6G021530/CsaV3_7G029290/CsaV3_3G035460/CsaV3_3G031360/CsaV3_5G010880/CsaV3_7G0…	15	CsaV3_7G021830/CsaV3_3G005110/CsaV3_3G047480/CsaV3_4G036580/CsaV3_6G045790/CsaV3_7G003720/novel.992/CsaV3_1G023010/CsaV3_2G007620/CsaV3_1G028950/CsaV3_4G002110/CsaV3_2G015740/CsaV3_6G003670/CsaV3_5G026430/CsaV3_2G001680
BP	GO:0043043	peptide biosynthetic process	183/2462	270/5903	8.22384e-19	1.13489e-16	CsaV3_7G021830/CsaV3_3G015690/CsaV3_4G004050/CsaV3_1G010160/CsaV3_4G032830/CsaV3_5G039260/CsaV3_6G050830/CsaV3_5G013970/CsaV3_1G014590/CsaV3_3G040630/CsaV3_3G019240/CsaV3_4G009970/CsaV3_3G005110/CsaV3_3G020570/CsaV3_3G032940/CsaV3_3G004770/CsaV3_5G005100/CsaV3_6G016380/CsaV3_6G046990/CsaV3_7G003660/CsaV3_4G031960/CsaV3_4G008900/CsaV3_1G032830/CsaV3_6G021530/CsaV3_7G029290/CsaV3_3G035460/CsaV3_3G0…	CsaV3_7G021830/CsaV3_3G015690/CsaV3_4G004050/CsaV3_1G010160/CsaV3_4G032830/CsaV3_5G039260/CsaV3_6G050830/CsaV3_5G013970/CsaV3_1G014590/CsaV3_3G040630/CsaV3_3G019240/CsaV3_4G009970/CsaV3_3G005110/CsaV3_3G020570/CsaV3_3G032940/CsaV3_3G004770/CsaV3_5G005100/CsaV3_6G016380/CsaV3_6G046990/CsaV3_7G003660/CsaV3_4G031960/CsaV3_4G008900/CsaV3_1G032830/CsaV3_6G021530/CsaV3_7G029290/CsaV3_3G035460/CsaV3_3G0…	183	171	CsaV3_3G015690/CsaV3_4G004050/CsaV3_1G010160/CsaV3_4G032830/CsaV3_5G039260/CsaV3_6G050830/CsaV3_5G013970/CsaV3_1G014590/CsaV3_3G040630/CsaV3_3G019240/CsaV3_4G009970/CsaV3_3G020570/CsaV3_3G032940/CsaV3_3G004770/CsaV3_5G005100/CsaV3_6G016380/CsaV3_6G046990/CsaV3_7G003660/CsaV3_4G031960/CsaV3_4G008900/CsaV3_1G032830/CsaV3_6G021530/CsaV3_7G029290/CsaV3_3G035460/CsaV3_3G031360/CsaV3_5G010880/CsaV3_7G0…	12	CsaV3_7G021830/CsaV3_3G005110/CsaV3_4G036580/CsaV3_7G003720/novel.992/CsaV3_1G023010/CsaV3_2G007620/CsaV3_1G028950/CsaV3_4G002110/CsaV3_2G015740/CsaV3_6G003670/CsaV3_5G026430
BP	GO:0043603	cellular amide metabolic process	194/2462	294/5903	6.56943e-18	6.79936e-16	CsaV3_7G021830/CsaV3_3G015690/CsaV3_4G004050/CsaV3_1G010160/CsaV3_4G032830/CsaV3_3G009100/CsaV3_5G039260/CsaV3_6G050830/CsaV3_5G013970/CsaV3_1G014590/CsaV3_3G040630/CsaV3_3G019240/CsaV3_4G009970/CsaV3_3G005110/CsaV3_6G048550/CsaV3_3G020570/CsaV3_3G032940/CsaV3_3G004770/CsaV3_5G005100/CsaV3_6G016380/CsaV3_6G046990/CsaV3_7G003660/CsaV3_4G031960/CsaV3_3G047480/CsaV3_4G008900/CsaV3_1G032830/CsaV3_6G0…	CsaV3_7G021830/CsaV3_3G015690/CsaV3_4G004050/CsaV3_1G010160/CsaV3_4G032830/CsaV3_3G009100/CsaV3_5G039260/CsaV3_6G050830/CsaV3_5G013970/CsaV3_1G014590/CsaV3_3G040630/CsaV3_3G019240/CsaV3_4G009970/CsaV3_3G005110/CsaV3_6G048550/CsaV3_3G020570/CsaV3_3G032940/CsaV3_3G004770/CsaV3_5G005100/CsaV3_6G016380/CsaV3_6G046990/CsaV3_7G003660/CsaV3_4G031960/CsaV3_3G047480/CsaV3_4G008900/CsaV3_1G032830/CsaV3_6G0…	194	177	CsaV3_3G015690/CsaV3_4G004050/CsaV3_1G010160/CsaV3_4G032830/CsaV3_3G009100/CsaV3_5G039260/CsaV3_6G050830/CsaV3_5G013970/CsaV3_1G014590/CsaV3_3G040630/CsaV3_3G019240/CsaV3_4G009970/CsaV3_3G020570/CsaV3_3G032940/CsaV3_3G004770/CsaV3_5G005100/CsaV3_6G016380/CsaV3_6G046990/CsaV3_7G003660/CsaV3_4G031960/CsaV3_4G008900/CsaV3_1G032830/CsaV3_6G021530/CsaV3_7G029290/CsaV3_3G035460/CsaV3_3G031360/CsaV3_5G0…	17	CsaV3_7G021830/CsaV3_3G005110/CsaV3_6G048550/CsaV3_3G047480/CsaV3_4G036580/CsaV3_6G045790/CsaV3_7G003720/novel.992/CsaV3_1G023010/CsaV3_6G016090/CsaV3_2G007620/CsaV3_1G028950/CsaV3_4G002110/CsaV3_2G015740/CsaV3_6G003670/CsaV3_5G026430/CsaV3_2G001680
BP	GO:0043604	amide biosynthetic process	187/2462	282/5903	1.23757e-17	1.02471e-15	CsaV3_7G021830/CsaV3_3G015690/CsaV3_4G004050/CsaV3_1G010160/CsaV3_4G032830/CsaV3_3G009100/CsaV3_5G039260/CsaV3_6G050830/CsaV3_5G013970/CsaV3_1G014590/CsaV3_3G040630/CsaV3_3G019240/CsaV3_4G009970/CsaV3_3G005110/CsaV3_3G020570/CsaV3_3G032940/CsaV3_3G004770/CsaV3_5G005100/CsaV3_6G016380/CsaV3_6G046990/CsaV3_7G003660/CsaV3_4G031960/CsaV3_4G008900/CsaV3_1G032830/CsaV3_6G021530/CsaV3_7G029290/CsaV3_3G0…	CsaV3_7G021830/CsaV3_3G015690/CsaV3_4G004050/CsaV3_1G010160/CsaV3_4G032830/CsaV3_3G009100/CsaV3_5G039260/CsaV3_6G050830/CsaV3_5G013970/CsaV3_1G014590/CsaV3_3G040630/CsaV3_3G019240/CsaV3_4G009970/CsaV3_3G005110/CsaV3_3G020570/CsaV3_3G032940/CsaV3_3G004770/CsaV3_5G005100/CsaV3_6G016380/CsaV3_6G046990/CsaV3_7G003660/CsaV3_4G031960/CsaV3_4G008900/CsaV3_1G032830/CsaV3_6G021530/CsaV3_7G029290/CsaV3_3G0…	187	174	CsaV3_3G015690/CsaV3_4G004050/CsaV3_1G010160/CsaV3_4G032830/CsaV3_3G009100/CsaV3_5G039260/CsaV3_6G050830/CsaV3_5G013970/CsaV3_1G014590/CsaV3_3G040630/CsaV3_3G019240/CsaV3_4G009970/CsaV3_3G020570/CsaV3_3G032940/CsaV3_3G004770/CsaV3_5G005100/CsaV3_6G016380/CsaV3_6G046990/CsaV3_7G003660/CsaV3_4G031960/CsaV3_4G008900/CsaV3_1G032830/CsaV3_6G021530/CsaV3_7G029290/CsaV3_3G035460/CsaV3_3G031360/CsaV3_5G0…	13	CsaV3_7G021830/CsaV3_3G005110/CsaV3_4G036580/CsaV3_7G003720/novel.992/CsaV3_1G023010/CsaV3_6G016090/CsaV3_2G007620/CsaV3_1G028950/CsaV3_4G002110/CsaV3_2G015740/CsaV3_6G003670/CsaV3_5G026430
BP	GO:1901566	organonitrogen compound biosynthetic process	281/2462	482/5903	1.50826e-14	1.0407e-12	CsaV3_7G021830/CsaV3_5G031040/CsaV3_3G015690/CsaV3_4G004050/CsaV3_1G010160/CsaV3_4G031360/CsaV3_5G035760/CsaV3_4G032830/CsaV3_3G009100/CsaV3_5G039260/CsaV3_4G007220/CsaV3_7G005980/CsaV3_6G050830/CsaV3_2G033180/CsaV3_1G042920/CsaV3_5G013970/CsaV3_1G014590/CsaV3_3G040630/CsaV3_3G019240/CsaV3_6G014760/CsaV3_4G009970/CsaV3_6G003290/CsaV3_3G005110/CsaV3_2G003300/CsaV3_3G020570/CsaV3_5G002770/CsaV3_3G0…	CsaV3_7G021830/CsaV3_5G031040/CsaV3_3G015690/CsaV3_4G004050/CsaV3_1G010160/CsaV3_4G031360/CsaV3_5G035760/CsaV3_4G032830/CsaV3_3G009100/CsaV3_5G039260/CsaV3_4G007220/CsaV3_7G005980/CsaV3_6G050830/CsaV3_2G033180/CsaV3_1G042920/CsaV3_5G013970/CsaV3_1G014590/CsaV3_3G040630/CsaV3_3G019240/CsaV3_6G014760/CsaV3_4G009970/CsaV3_6G003290/CsaV3_3G005110/CsaV3_2G003300/CsaV3_3G020570/CsaV3_5G002770/CsaV3_3G0…	281	241	CsaV3_3G015690/CsaV3_4G004050/CsaV3_1G010160/CsaV3_4G031360/CsaV3_4G032830/CsaV3_3G009100/CsaV3_5G039260/CsaV3_4G007220/CsaV3_7G005980/CsaV3_6G050830/CsaV3_2G033180/CsaV3_5G013970/CsaV3_1G014590/CsaV3_3G040630/CsaV3_3G019240/CsaV3_6G014760/CsaV3_4G009970/CsaV3_2G003300/CsaV3_3G020570/CsaV3_5G002770/CsaV3_3G032940/CsaV3_3G004770/CsaV3_5G005100/CsaV3_6G016380/CsaV3_3G021780/CsaV3_6G046990/CsaV3_7G0…	40	CsaV3_7G021830/CsaV3_5G031040/CsaV3_5G035760/CsaV3_1G042920/CsaV3_6G003290/CsaV3_3G005110/CsaV3_7G018620/CsaV3_6G040120/CsaV3_2G025670/CsaV3_2G007090/CsaV3_4G036580/CsaV3_2G007750/CsaV3_6G047800/CsaV3_7G003720/CsaV3_6G040130/CsaV3_1G038260/CsaV3_5G028680/novel.992/CsaV3_1G031540/CsaV3_1G023010/CsaV3_6G048080/novel.201/CsaV3_6G016090/CsaV3_3G023460/CsaV3_2G007620/CsaV3_1G010750/CsaV3_1G008060/CsaV…
BP	GO:0006260	DNA replication	33/2462	47/5903	6.87602e-05	0.00406667	CsaV3_6G014890/CsaV3_4G012090/CsaV3_3G019190/CsaV3_4G031600/CsaV3_2G003690/CsaV3_1G002970/CsaV3_6G016510/CsaV3_2G028020/CsaV3_4G028050/CsaV3_4G033030/CsaV3_6G042080/CsaV3_3G038830/CsaV3_3G017530/CsaV3_2G016500/CsaV3_2G010800/CsaV3_7G006750/CsaV3_6G053180/CsaV3_2G016060/CsaV3_6G051630/CsaV3_6G008170/CsaV3_5G005690/CsaV3_1G006150/CsaV3_5G008820/CsaV3_5G005010/CsaV3_7G026150/CsaV3_2G003500/CsaV3_3G0…	CsaV3_6G014890/CsaV3_4G012090/CsaV3_3G019190/CsaV3_4G031600/CsaV3_2G003690/CsaV3_1G002970/CsaV3_6G016510/CsaV3_2G028020/CsaV3_4G028050/CsaV3_4G033030/CsaV3_6G042080/CsaV3_3G038830/CsaV3_3G017530/CsaV3_2G016500/CsaV3_2G010800/CsaV3_7G006750/CsaV3_6G053180/CsaV3_2G016060/CsaV3_6G051630/CsaV3_6G008170/CsaV3_5G005690/CsaV3_1G006150/CsaV3_5G008820/CsaV3_5G005010/CsaV3_7G026150/CsaV3_2G003500/CsaV3_3G0…	33	31	CsaV3_6G014890/CsaV3_4G012090/CsaV3_3G019190/CsaV3_4G031600/CsaV3_2G003690/CsaV3_1G002970/CsaV3_6G016510/CsaV3_2G028020/CsaV3_4G028050/CsaV3_4G033030/CsaV3_6G042080/CsaV3_3G038830/CsaV3_3G017530/CsaV3_2G016500/CsaV3_2G010800/CsaV3_7G006750/CsaV3_6G053180/CsaV3_2G016060/CsaV3_6G051630/CsaV3_6G008170/CsaV3_1G006150/CsaV3_5G008820/CsaV3_5G005010/CsaV3_7G026150/CsaV3_2G003500/CsaV3_3G003530/CsaV3_6G0…	2	CsaV3_5G005690/CsaV3_6G046400
BP	GO:0009127	purine nucleoside monophosphate biosynthetic process	32/2462	48/5903	0.000401527	0.0166232	CsaV3_2G033180/CsaV3_5G002770/CsaV3_3G021780/CsaV3_6G013500/CsaV3_2G013320/CsaV3_3G036910/CsaV3_6G002740/CsaV3_1G046070/CsaV3_5G034810/CsaV3_1G005960/CsaV3_6G048080/CsaV3_5G028690/CsaV3_5G008870/CsaV3_7G022930/CsaV3_3G010470/CsaV3_3G023460/CsaV3_1G010750/CsaV3_6G040390/CsaV3_4G037690/CsaV3_5G029170/CsaV3_7G031080/CsaV3_5G036470/CsaV3_6G040330/CsaV3_6G040430/CsaV3_3G007840/CsaV3_UNG052430/CsaV3_2G…	CsaV3_2G033180/CsaV3_5G002770/CsaV3_3G021780/CsaV3_6G013500/CsaV3_2G013320/CsaV3_3G036910/CsaV3_6G002740/CsaV3_1G046070/CsaV3_5G034810/CsaV3_1G005960/CsaV3_6G048080/CsaV3_5G028690/CsaV3_5G008870/CsaV3_7G022930/CsaV3_3G010470/CsaV3_3G023460/CsaV3_1G010750/CsaV3_6G040390/CsaV3_4G037690/CsaV3_5G029170/CsaV3_7G031080/CsaV3_5G036470/CsaV3_6G040330/CsaV3_6G040430/CsaV3_3G007840/CsaV3_UNG052430/CsaV3_2G…	32	28	CsaV3_2G033180/CsaV3_5G002770/CsaV3_3G021780/CsaV3_6G013500/CsaV3_2G013320/CsaV3_3G036910/CsaV3_6G002740/CsaV3_1G046070/CsaV3_5G034810/CsaV3_1G005960/CsaV3_5G028690/CsaV3_5G008870/CsaV3_7G022930/CsaV3_3G010470/CsaV3_6G040390/CsaV3_4G037690/CsaV3_5G029170/CsaV3_7G031080/CsaV3_5G036470/CsaV3_6G040330/CsaV3_6G040430/CsaV3_UNG052430/CsaV3_2G001570/CsaV3_2G028640/CsaV3_1G035920/CsaV3_2G030420/CsaV3_6G…	4	CsaV3_6G048080/CsaV3_3G023460/CsaV3_1G010750/CsaV3_3G007840
BP	GO:0009156	ribonucleoside monophosphate biosynthetic process	32/2462	48/5903	0.000401527	0.0166232	CsaV3_2G033180/CsaV3_5G002770/CsaV3_3G021780/CsaV3_6G013500/CsaV3_2G013320/CsaV3_3G036910/CsaV3_6G002740/CsaV3_1G046070/CsaV3_5G034810/CsaV3_1G005960/CsaV3_6G048080/CsaV3_5G028690/CsaV3_5G008870/CsaV3_7G022930/CsaV3_3G010470/CsaV3_3G023460/CsaV3_1G010750/CsaV3_6G040390/CsaV3_4G037690/CsaV3_5G029170/CsaV3_7G031080/CsaV3_5G036470/CsaV3_6G040330/CsaV3_6G040430/CsaV3_3G007840/CsaV3_UNG052430/CsaV3_2G…	CsaV3_2G033180/CsaV3_5G002770/CsaV3_3G021780/CsaV3_6G013500/CsaV3_2G013320/CsaV3_3G036910/CsaV3_6G002740/CsaV3_1G046070/CsaV3_5G034810/CsaV3_1G005960/CsaV3_6G048080/CsaV3_5G028690/CsaV3_5G008870/CsaV3_7G022930/CsaV3_3G010470/CsaV3_3G023460/CsaV3_1G010750/CsaV3_6G040390/CsaV3_4G037690/CsaV3_5G029170/CsaV3_7G031080/CsaV3_5G036470/CsaV3_6G040330/CsaV3_6G040430/CsaV3_3G007840/CsaV3_UNG052430/CsaV3_2G…	32	28	CsaV3_2G033180/CsaV3_5G002770/CsaV3_3G021780/CsaV3_6G013500/CsaV3_2G013320/CsaV3_3G036910/CsaV3_6G002740/CsaV3_1G046070/CsaV3_5G034810/CsaV3_1G005960/CsaV3_5G028690/CsaV3_5G008870/CsaV3_7G022930/CsaV3_3G010470/CsaV3_6G040390/CsaV3_4G037690/CsaV3_5G029170/CsaV3_7G031080/CsaV3_5G036470/CsaV3_6G040330/CsaV3_6G040430/CsaV3_UNG052430/CsaV3_2G001570/CsaV3_2G028640/CsaV3_1G035920/CsaV3_2G030420/CsaV3_6G…	4	CsaV3_6G048080/CsaV3_3G023460/CsaV3_1G010750/CsaV3_3G007840
BP	GO:0009168	purine ribonucleoside monophosphate biosynthetic process	32/2462	48/5903	0.000401527	0.0166232	CsaV3_2G033180/CsaV3_5G002770/CsaV3_3G021780/CsaV3_6G013500/CsaV3_2G013320/CsaV3_3G036910/CsaV3_6G002740/CsaV3_1G046070/CsaV3_5G034810/CsaV3_1G005960/CsaV3_6G048080/CsaV3_5G028690/CsaV3_5G008870/CsaV3_7G022930/CsaV3_3G010470/CsaV3_3G023460/CsaV3_1G010750/CsaV3_6G040390/CsaV3_4G037690/CsaV3_5G029170/CsaV3_7G031080/CsaV3_5G036470/CsaV3_6G040330/CsaV3_6G040430/CsaV3_3G007840/CsaV3_UNG052430/CsaV3_2G…	CsaV3_2G033180/CsaV3_5G002770/CsaV3_3G021780/CsaV3_6G013500/CsaV3_2G013320/CsaV3_3G036910/CsaV3_6G002740/CsaV3_1G046070/CsaV3_5G034810/CsaV3_1G005960/CsaV3_6G048080/CsaV3_5G028690/CsaV3_5G008870/CsaV3_7G022930/CsaV3_3G010470/CsaV3_3G023460/CsaV3_1G010750/CsaV3_6G040390/CsaV3_4G037690/CsaV3_5G029170/CsaV3_7G031080/CsaV3_5G036470/CsaV3_6G040330/CsaV3_6G040430/CsaV3_3G007840/CsaV3_UNG052430/CsaV3_2G…	32	28	CsaV3_2G033180/CsaV3_5G002770/CsaV3_3G021780/CsaV3_6G013500/CsaV3_2G013320/CsaV3_3G036910/CsaV3_6G002740/CsaV3_1G046070/CsaV3_5G034810/CsaV3_1G005960/CsaV3_5G028690/CsaV3_5G008870/CsaV3_7G022930/CsaV3_3G010470/CsaV3_6G040390/CsaV3_4G037690/CsaV3_5G029170/CsaV3_7G031080/CsaV3_5G036470/CsaV3_6G040330/CsaV3_6G040430/CsaV3_UNG052430/CsaV3_2G001570/CsaV3_2G028640/CsaV3_1G035920/CsaV3_2G030420/CsaV3_6G…	4	CsaV3_6G048080/CsaV3_3G023460/CsaV3_1G010750/CsaV3_3G007840
BP	GO:0072522	purine-containing compound biosynthetic process	36/2462	56/5903	0.000515504	0.0194017	CsaV3_4G031360/CsaV3_2G033180/CsaV3_5G002770/CsaV3_3G021780/CsaV3_6G013500/CsaV3_2G013320/CsaV3_3G036910/CsaV3_6G002740/CsaV3_1G046070/CsaV3_3G006560/CsaV3_5G034810/CsaV3_1G005960/CsaV3_6G048080/CsaV3_5G028690/CsaV3_5G008870/CsaV3_7G022930/CsaV3_3G010470/CsaV3_3G023460/CsaV3_1G010750/CsaV3_6G040390/CsaV3_4G037690/CsaV3_5G029170/CsaV3_7G031080/CsaV3_5G036470/CsaV3_6G040330/CsaV3_4G000530/CsaV3_6G0…	CsaV3_4G031360/CsaV3_2G033180/CsaV3_5G002770/CsaV3_3G021780/CsaV3_6G013500/CsaV3_2G013320/CsaV3_3G036910/CsaV3_6G002740/CsaV3_1G046070/CsaV3_3G006560/CsaV3_5G034810/CsaV3_1G005960/CsaV3_6G048080/CsaV3_5G028690/CsaV3_5G008870/CsaV3_7G022930/CsaV3_3G010470/CsaV3_3G023460/CsaV3_1G010750/CsaV3_6G040390/CsaV3_4G037690/CsaV3_5G029170/CsaV3_7G031080/CsaV3_5G036470/CsaV3_6G040330/CsaV3_4G000530/CsaV3_6G0…	36	31	CsaV3_4G031360/CsaV3_2G033180/CsaV3_5G002770/CsaV3_3G021780/CsaV3_6G013500/CsaV3_2G013320/CsaV3_3G036910/CsaV3_6G002740/CsaV3_1G046070/CsaV3_3G006560/CsaV3_5G034810/CsaV3_1G005960/CsaV3_5G028690/CsaV3_5G008870/CsaV3_7G022930/CsaV3_3G010470/CsaV3_6G040390/CsaV3_4G037690/CsaV3_5G029170/CsaV3_7G031080/CsaV3_5G036470/CsaV3_6G040330/CsaV3_6G040430/CsaV3_3G007170/CsaV3_UNG052430/CsaV3_2G001570/CsaV3_2G…	5	CsaV3_6G048080/CsaV3_3G023460/CsaV3_1G010750/CsaV3_4G000530/CsaV3_3G007840
BP	GO:0009124	nucleoside monophosphate biosynthetic process	32/2462	49/5903	0.000697877	0.0209812	CsaV3_2G033180/CsaV3_5G002770/CsaV3_3G021780/CsaV3_6G013500/CsaV3_2G013320/CsaV3_3G036910/CsaV3_6G002740/CsaV3_1G046070/CsaV3_5G034810/CsaV3_1G005960/CsaV3_6G048080/CsaV3_5G028690/CsaV3_5G008870/CsaV3_7G022930/CsaV3_3G010470/CsaV3_3G023460/CsaV3_1G010750/CsaV3_6G040390/CsaV3_4G037690/CsaV3_5G029170/CsaV3_7G031080/CsaV3_5G036470/CsaV3_6G040330/CsaV3_6G040430/CsaV3_3G007840/CsaV3_UNG052430/CsaV3_2G…	CsaV3_2G033180/CsaV3_5G002770/CsaV3_3G021780/CsaV3_6G013500/CsaV3_2G013320/CsaV3_3G036910/CsaV3_6G002740/CsaV3_1G046070/CsaV3_5G034810/CsaV3_1G005960/CsaV3_6G048080/CsaV3_5G028690/CsaV3_5G008870/CsaV3_7G022930/CsaV3_3G010470/CsaV3_3G023460/CsaV3_1G010750/CsaV3_6G040390/CsaV3_4G037690/CsaV3_5G029170/CsaV3_7G031080/CsaV3_5G036470/CsaV3_6G040330/CsaV3_6G040430/CsaV3_3G007840/CsaV3_UNG052430/CsaV3_2G…	32	28	CsaV3_2G033180/CsaV3_5G002770/CsaV3_3G021780/CsaV3_6G013500/CsaV3_2G013320/CsaV3_3G036910/CsaV3_6G002740/CsaV3_1G046070/CsaV3_5G034810/CsaV3_1G005960/CsaV3_5G028690/CsaV3_5G008870/CsaV3_7G022930/CsaV3_3G010470/CsaV3_6G040390/CsaV3_4G037690/CsaV3_5G029170/CsaV3_7G031080/CsaV3_5G036470/CsaV3_6G040330/CsaV3_6G040430/CsaV3_UNG052430/CsaV3_2G001570/CsaV3_2G028640/CsaV3_1G035920/CsaV3_2G030420/CsaV3_6G…	4	CsaV3_6G048080/CsaV3_3G023460/CsaV3_1G010750/CsaV3_3G007840
BP	GO:0009152	purine ribonucleotide biosynthetic process	34/2462	53/5903	0.000776236	0.0209812	CsaV3_2G033180/CsaV3_5G002770/CsaV3_3G021780/CsaV3_6G013500/CsaV3_2G013320/CsaV3_3G036910/CsaV3_6G002740/CsaV3_1G046070/CsaV3_5G034810/CsaV3_1G005960/CsaV3_6G048080/CsaV3_5G028690/CsaV3_5G008870/CsaV3_7G022930/CsaV3_3G010470/CsaV3_3G023460/CsaV3_1G010750/CsaV3_6G040390/CsaV3_4G037690/CsaV3_5G029170/CsaV3_7G031080/CsaV3_5G036470/CsaV3_6G040330/CsaV3_4G000530/CsaV3_6G040430/CsaV3_3G007840/CsaV3_3G0…	CsaV3_2G033180/CsaV3_5G002770/CsaV3_3G021780/CsaV3_6G013500/CsaV3_2G013320/CsaV3_3G036910/CsaV3_6G002740/CsaV3_1G046070/CsaV3_5G034810/CsaV3_1G005960/CsaV3_6G048080/CsaV3_5G028690/CsaV3_5G008870/CsaV3_7G022930/CsaV3_3G010470/CsaV3_3G023460/CsaV3_1G010750/CsaV3_6G040390/CsaV3_4G037690/CsaV3_5G029170/CsaV3_7G031080/CsaV3_5G036470/CsaV3_6G040330/CsaV3_4G000530/CsaV3_6G040430/CsaV3_3G007840/CsaV3_3G0…	34	29	CsaV3_2G033180/CsaV3_5G002770/CsaV3_3G021780/CsaV3_6G013500/CsaV3_2G013320/CsaV3_3G036910/CsaV3_6G002740/CsaV3_1G046070/CsaV3_5G034810/CsaV3_1G005960/CsaV3_5G028690/CsaV3_5G008870/CsaV3_7G022930/CsaV3_3G010470/CsaV3_6G040390/CsaV3_4G037690/CsaV3_5G029170/CsaV3_7G031080/CsaV3_5G036470/CsaV3_6G040330/CsaV3_6G040430/CsaV3_3G007170/CsaV3_UNG052430/CsaV3_2G001570/CsaV3_2G028640/CsaV3_1G035920/CsaV3_2G…	5	CsaV3_6G048080/CsaV3_3G023460/CsaV3_1G010750/CsaV3_4G000530/CsaV3_3G007840
BP	GO:0009260	ribonucleotide biosynthetic process	34/2462	53/5903	0.000776236	0.0209812	CsaV3_2G033180/CsaV3_5G002770/CsaV3_3G021780/CsaV3_6G013500/CsaV3_2G013320/CsaV3_3G036910/CsaV3_6G002740/CsaV3_1G046070/CsaV3_5G034810/CsaV3_1G005960/CsaV3_6G048080/CsaV3_5G028690/CsaV3_5G008870/CsaV3_7G022930/CsaV3_3G010470/CsaV3_3G023460/CsaV3_1G010750/CsaV3_6G040390/CsaV3_4G037690/CsaV3_5G029170/CsaV3_7G031080/CsaV3_5G036470/CsaV3_6G040330/CsaV3_4G000530/CsaV3_6G040430/CsaV3_3G007840/CsaV3_3G0…	CsaV3_2G033180/CsaV3_5G002770/CsaV3_3G021780/CsaV3_6G013500/CsaV3_2G013320/CsaV3_3G036910/CsaV3_6G002740/CsaV3_1G046070/CsaV3_5G034810/CsaV3_1G005960/CsaV3_6G048080/CsaV3_5G028690/CsaV3_5G008870/CsaV3_7G022930/CsaV3_3G010470/CsaV3_3G023460/CsaV3_1G010750/CsaV3_6G040390/CsaV3_4G037690/CsaV3_5G029170/CsaV3_7G031080/CsaV3_5G036470/CsaV3_6G040330/CsaV3_4G000530/CsaV3_6G040430/CsaV3_3G007840/CsaV3_3G0…	34	29	CsaV3_2G033180/CsaV3_5G002770/CsaV3_3G021780/CsaV3_6G013500/CsaV3_2G013320/CsaV3_3G036910/CsaV3_6G002740/CsaV3_1G046070/CsaV3_5G034810/CsaV3_1G005960/CsaV3_5G028690/CsaV3_5G008870/CsaV3_7G022930/CsaV3_3G010470/CsaV3_6G040390/CsaV3_4G037690/CsaV3_5G029170/CsaV3_7G031080/CsaV3_5G036470/CsaV3_6G040330/CsaV3_6G040430/CsaV3_3G007170/CsaV3_UNG052430/CsaV3_2G001570/CsaV3_2G028640/CsaV3_1G035920/CsaV3_2G…	5	CsaV3_6G048080/CsaV3_3G023460/CsaV3_1G010750/CsaV3_4G000530/CsaV3_3G007840
BP	GO:0046390	ribose phosphate biosynthetic process	34/2462	53/5903	0.000776236	0.0209812	CsaV3_2G033180/CsaV3_5G002770/CsaV3_3G021780/CsaV3_6G013500/CsaV3_2G013320/CsaV3_3G036910/CsaV3_6G002740/CsaV3_1G046070/CsaV3_5G034810/CsaV3_1G005960/CsaV3_6G048080/CsaV3_5G028690/CsaV3_5G008870/CsaV3_7G022930/CsaV3_3G010470/CsaV3_3G023460/CsaV3_1G010750/CsaV3_6G040390/CsaV3_4G037690/CsaV3_5G029170/CsaV3_7G031080/CsaV3_5G036470/CsaV3_6G040330/CsaV3_4G000530/CsaV3_6G040430/CsaV3_3G007840/CsaV3_3G0…	CsaV3_2G033180/CsaV3_5G002770/CsaV3_3G021780/CsaV3_6G013500/CsaV3_2G013320/CsaV3_3G036910/CsaV3_6G002740/CsaV3_1G046070/CsaV3_5G034810/CsaV3_1G005960/CsaV3_6G048080/CsaV3_5G028690/CsaV3_5G008870/CsaV3_7G022930/CsaV3_3G010470/CsaV3_3G023460/CsaV3_1G010750/CsaV3_6G040390/CsaV3_4G037690/CsaV3_5G029170/CsaV3_7G031080/CsaV3_5G036470/CsaV3_6G040330/CsaV3_4G000530/CsaV3_6G040430/CsaV3_3G007840/CsaV3_3G0…	34	29	CsaV3_2G033180/CsaV3_5G002770/CsaV3_3G021780/CsaV3_6G013500/CsaV3_2G013320/CsaV3_3G036910/CsaV3_6G002740/CsaV3_1G046070/CsaV3_5G034810/CsaV3_1G005960/CsaV3_5G028690/CsaV3_5G008870/CsaV3_7G022930/CsaV3_3G010470/CsaV3_6G040390/CsaV3_4G037690/CsaV3_5G029170/CsaV3_7G031080/CsaV3_5G036470/CsaV3_6G040330/CsaV3_6G040430/CsaV3_3G007170/CsaV3_UNG052430/CsaV3_2G001570/CsaV3_2G028640/CsaV3_1G035920/CsaV3_2G…	5	CsaV3_6G048080/CsaV3_3G023460/CsaV3_1G010750/CsaV3_4G000530/CsaV3_3G007840
BP	GO:0006164	purine nucleotide biosynthetic process	35/2462	55/5903	0.000810868	0.0209812	CsaV3_4G031360/CsaV3_2G033180/CsaV3_5G002770/CsaV3_3G021780/CsaV3_6G013500/CsaV3_2G013320/CsaV3_3G036910/CsaV3_6G002740/CsaV3_1G046070/CsaV3_5G034810/CsaV3_1G005960/CsaV3_6G048080/CsaV3_5G028690/CsaV3_5G008870/CsaV3_7G022930/CsaV3_3G010470/CsaV3_3G023460/CsaV3_1G010750/CsaV3_6G040390/CsaV3_4G037690/CsaV3_5G029170/CsaV3_7G031080/CsaV3_5G036470/CsaV3_6G040330/CsaV3_4G000530/CsaV3_6G040430/CsaV3_3G0…	CsaV3_4G031360/CsaV3_2G033180/CsaV3_5G002770/CsaV3_3G021780/CsaV3_6G013500/CsaV3_2G013320/CsaV3_3G036910/CsaV3_6G002740/CsaV3_1G046070/CsaV3_5G034810/CsaV3_1G005960/CsaV3_6G048080/CsaV3_5G028690/CsaV3_5G008870/CsaV3_7G022930/CsaV3_3G010470/CsaV3_3G023460/CsaV3_1G010750/CsaV3_6G040390/CsaV3_4G037690/CsaV3_5G029170/CsaV3_7G031080/CsaV3_5G036470/CsaV3_6G040330/CsaV3_4G000530/CsaV3_6G040430/CsaV3_3G0…	35	30	CsaV3_4G031360/CsaV3_2G033180/CsaV3_5G002770/CsaV3_3G021780/CsaV3_6G013500/CsaV3_2G013320/CsaV3_3G036910/CsaV3_6G002740/CsaV3_1G046070/CsaV3_5G034810/CsaV3_1G005960/CsaV3_5G028690/CsaV3_5G008870/CsaV3_7G022930/CsaV3_3G010470/CsaV3_6G040390/CsaV3_4G037690/CsaV3_5G029170/CsaV3_7G031080/CsaV3_5G036470/CsaV3_6G040330/CsaV3_6G040430/CsaV3_3G007170/CsaV3_UNG052430/CsaV3_2G001570/CsaV3_2G028640/CsaV3_1G…	5	CsaV3_6G048080/CsaV3_3G023460/CsaV3_1G010750/CsaV3_4G000530/CsaV3_3G007840
BP	GO:0046434	organophosphate catabolic process	22/2462	31/5903	0.000916158	0.0223111	CsaV3_5G026900/CsaV3_3G021780/CsaV3_6G013500/CsaV3_2G013320/CsaV3_3G036910/CsaV3_1G046070/CsaV3_6G048080/CsaV3_5G028690/CsaV3_7G022930/CsaV3_3G023460/CsaV3_6G040390/CsaV3_4G037690/CsaV3_5G029170/CsaV3_6G040330/CsaV3_6G040430/CsaV3_5G024850/CsaV3_2G028640/CsaV3_1G041450/CsaV3_1G035920/CsaV3_2G030420/CsaV3_6G048680/CsaV3_6G040340	CsaV3_5G026900/CsaV3_3G021780/CsaV3_6G013500/CsaV3_2G013320/CsaV3_3G036910/CsaV3_1G046070/CsaV3_6G048080/CsaV3_5G028690/CsaV3_7G022930/CsaV3_3G023460/CsaV3_6G040390/CsaV3_4G037690/CsaV3_5G029170/CsaV3_6G040330/CsaV3_6G040430/CsaV3_5G024850/CsaV3_2G028640/CsaV3_1G041450/CsaV3_1G035920/CsaV3_2G030420/CsaV3_6G048680/CsaV3_6G040340	22	17	CsaV3_3G021780/CsaV3_6G013500/CsaV3_2G013320/CsaV3_3G036910/CsaV3_1G046070/CsaV3_5G028690/CsaV3_7G022930/CsaV3_6G040390/CsaV3_4G037690/CsaV3_5G029170/CsaV3_6G040330/CsaV3_6G040430/CsaV3_2G028640/CsaV3_1G035920/CsaV3_2G030420/CsaV3_6G048680/CsaV3_6G040340	5	CsaV3_5G026900/CsaV3_6G048080/CsaV3_3G023460/CsaV3_5G024850/CsaV3_1G041450
BP	GO:0034404	nucleobase-containing small molecule biosynthetic process	23/2462	33/5903	0.00104611	0.0240604	CsaV3_5G002770/CsaV3_3G021780/CsaV3_6G013500/CsaV3_2G013320/CsaV3_3G036910/CsaV3_1G046070/CsaV3_6G048080/CsaV3_5G028690/CsaV3_7G022930/CsaV3_3G023460/CsaV3_6G040390/CsaV3_4G037690/CsaV3_5G029170/CsaV3_6G040330/CsaV3_6G040430/CsaV3_2G033090/CsaV3_3G007170/CsaV3_2G028640/CsaV3_1G041450/CsaV3_1G035920/CsaV3_2G030420/CsaV3_6G048680/CsaV3_6G040340	CsaV3_5G002770/CsaV3_3G021780/CsaV3_6G013500/CsaV3_2G013320/CsaV3_3G036910/CsaV3_1G046070/CsaV3_6G048080/CsaV3_5G028690/CsaV3_7G022930/CsaV3_3G023460/CsaV3_6G040390/CsaV3_4G037690/CsaV3_5G029170/CsaV3_6G040330/CsaV3_6G040430/CsaV3_2G033090/CsaV3_3G007170/CsaV3_2G028640/CsaV3_1G041450/CsaV3_1G035920/CsaV3_2G030420/CsaV3_6G048680/CsaV3_6G040340	23	20	CsaV3_5G002770/CsaV3_3G021780/CsaV3_6G013500/CsaV3_2G013320/CsaV3_3G036910/CsaV3_1G046070/CsaV3_5G028690/CsaV3_7G022930/CsaV3_6G040390/CsaV3_4G037690/CsaV3_5G029170/CsaV3_6G040330/CsaV3_6G040430/CsaV3_2G033090/CsaV3_3G007170/CsaV3_2G028640/CsaV3_1G035920/CsaV3_2G030420/CsaV3_6G048680/CsaV3_6G040340	3	CsaV3_6G048080/CsaV3_3G023460/CsaV3_1G041450
BP	GO:0009308	amine metabolic process	19/2462	26/5903	0.00117319	0.0255633	CsaV3_6G038150/CsaV3_1G001170/CsaV3_3G043270/CsaV3_4G036030/CsaV3_5G003800/CsaV3_7G022600/CsaV3_2G013730/CsaV3_2G007090/CsaV3_7G008280/CsaV3_2G007750/CsaV3_1G038260/CsaV3_6G038140/CsaV3_6G005510/CsaV3_1G040510/CsaV3_5G006200/CsaV3_5G010220/CsaV3_1G031480/CsaV3_3G013880/CsaV3_7G008290	CsaV3_6G038150/CsaV3_1G001170/CsaV3_3G043270/CsaV3_4G036030/CsaV3_5G003800/CsaV3_7G022600/CsaV3_2G013730/CsaV3_2G007090/CsaV3_7G008280/CsaV3_2G007750/CsaV3_1G038260/CsaV3_6G038140/CsaV3_6G005510/CsaV3_1G040510/CsaV3_5G006200/CsaV3_5G010220/CsaV3_1G031480/CsaV3_3G013880/CsaV3_7G008290	19	9	CsaV3_6G038150/CsaV3_3G043270/CsaV3_2G013730/CsaV3_6G038140/CsaV3_6G005510/CsaV3_5G010220/CsaV3_1G031480/CsaV3_3G013880/CsaV3_7G008290	10	CsaV3_1G001170/CsaV3_4G036030/CsaV3_5G003800/CsaV3_7G022600/CsaV3_2G007090/CsaV3_7G008280/CsaV3_2G007750/CsaV3_1G038260/CsaV3_1G040510/CsaV3_5G006200
BP	GO:0009166	nucleotide catabolic process	20/2462	28/5903	0.00138438	0.026086	CsaV3_3G021780/CsaV3_6G013500/CsaV3_2G013320/CsaV3_3G036910/CsaV3_1G046070/CsaV3_6G048080/CsaV3_5G028690/CsaV3_7G022930/CsaV3_3G023460/CsaV3_6G040390/CsaV3_4G037690/CsaV3_5G029170/CsaV3_6G040330/CsaV3_6G040430/CsaV3_2G028640/CsaV3_1G041450/CsaV3_1G035920/CsaV3_2G030420/CsaV3_6G048680/CsaV3_6G040340	CsaV3_3G021780/CsaV3_6G013500/CsaV3_2G013320/CsaV3_3G036910/CsaV3_1G046070/CsaV3_6G048080/CsaV3_5G028690/CsaV3_7G022930/CsaV3_3G023460/CsaV3_6G040390/CsaV3_4G037690/CsaV3_5G029170/CsaV3_6G040330/CsaV3_6G040430/CsaV3_2G028640/CsaV3_1G041450/CsaV3_1G035920/CsaV3_2G030420/CsaV3_6G048680/CsaV3_6G040340	20	17	CsaV3_3G021780/CsaV3_6G013500/CsaV3_2G013320/CsaV3_3G036910/CsaV3_1G046070/CsaV3_5G028690/CsaV3_7G022930/CsaV3_6G040390/CsaV3_4G037690/CsaV3_5G029170/CsaV3_6G040330/CsaV3_6G040430/CsaV3_2G028640/CsaV3_1G035920/CsaV3_2G030420/CsaV3_6G048680/CsaV3_6G040340	3	CsaV3_6G048080/CsaV3_3G023460/CsaV3_1G041450
BP	GO:1901292	nucleoside phosphate catabolic process	20/2462	28/5903	0.00138438	0.026086	CsaV3_3G021780/CsaV3_6G013500/CsaV3_2G013320/CsaV3_3G036910/CsaV3_1G046070/CsaV3_6G048080/CsaV3_5G028690/CsaV3_7G022930/CsaV3_3G023460/CsaV3_6G040390/CsaV3_4G037690/CsaV3_5G029170/CsaV3_6G040330/CsaV3_6G040430/CsaV3_2G028640/CsaV3_1G041450/CsaV3_1G035920/CsaV3_2G030420/CsaV3_6G048680/CsaV3_6G040340	CsaV3_3G021780/CsaV3_6G013500/CsaV3_2G013320/CsaV3_3G036910/CsaV3_1G046070/CsaV3_6G048080/CsaV3_5G028690/CsaV3_7G022930/CsaV3_3G023460/CsaV3_6G040390/CsaV3_4G037690/CsaV3_5G029170/CsaV3_6G040330/CsaV3_6G040430/CsaV3_2G028640/CsaV3_1G041450/CsaV3_1G035920/CsaV3_2G030420/CsaV3_6G048680/CsaV3_6G040340	20	17	CsaV3_3G021780/CsaV3_6G013500/CsaV3_2G013320/CsaV3_3G036910/CsaV3_1G046070/CsaV3_5G028690/CsaV3_7G022930/CsaV3_6G040390/CsaV3_4G037690/CsaV3_5G029170/CsaV3_6G040330/CsaV3_6G040430/CsaV3_2G028640/CsaV3_1G035920/CsaV3_2G030420/CsaV3_6G048680/CsaV3_6G040340	3	CsaV3_6G048080/CsaV3_3G023460/CsaV3_1G041450
BP	GO:0016052	carbohydrate catabolic process	26/2462	39/5903	0.00140103	0.026086	CsaV3_1G040000/CsaV3_6G005730/CsaV3_3G021780/CsaV3_4G013550/CsaV3_6G013500/CsaV3_3G023420/CsaV3_3G011520/CsaV3_2G013320/CsaV3_3G036910/CsaV3_1G046070/CsaV3_6G048080/CsaV3_5G028690/CsaV3_7G003840/CsaV3_7G022930/CsaV3_3G023460/CsaV3_6G040390/CsaV3_4G037690/CsaV3_5G029170/CsaV3_4G007080/CsaV3_6G040330/CsaV3_6G040430/CsaV3_2G028640/CsaV3_1G035920/CsaV3_2G030420/CsaV3_6G048680/CsaV3_6G040340	CsaV3_1G040000/CsaV3_6G005730/CsaV3_3G021780/CsaV3_4G013550/CsaV3_6G013500/CsaV3_3G023420/CsaV3_3G011520/CsaV3_2G013320/CsaV3_3G036910/CsaV3_1G046070/CsaV3_6G048080/CsaV3_5G028690/CsaV3_7G003840/CsaV3_7G022930/CsaV3_3G023460/CsaV3_6G040390/CsaV3_4G037690/CsaV3_5G029170/CsaV3_4G007080/CsaV3_6G040330/CsaV3_6G040430/CsaV3_2G028640/CsaV3_1G035920/CsaV3_2G030420/CsaV3_6G048680/CsaV3_6G040340	26	19	CsaV3_3G021780/CsaV3_4G013550/CsaV3_6G013500/CsaV3_3G023420/CsaV3_2G013320/CsaV3_3G036910/CsaV3_1G046070/CsaV3_5G028690/CsaV3_7G022930/CsaV3_6G040390/CsaV3_4G037690/CsaV3_5G029170/CsaV3_6G040330/CsaV3_6G040430/CsaV3_2G028640/CsaV3_1G035920/CsaV3_2G030420/CsaV3_6G048680/CsaV3_6G040340	7	CsaV3_1G040000/CsaV3_6G005730/CsaV3_3G011520/CsaV3_6G048080/CsaV3_7G003840/CsaV3_3G023460/CsaV3_4G007080
BP	GO:0009132	nucleoside diphosphate metabolic process	21/2462	30/5903	0.00158856	0.026086	CsaV3_3G021780/CsaV3_6G013500/CsaV3_3G027630/CsaV3_2G013320/CsaV3_3G036910/CsaV3_1G046070/CsaV3_6G048080/CsaV3_5G028690/CsaV3_7G022930/CsaV3_3G023460/CsaV3_6G040390/CsaV3_4G037690/CsaV3_5G029170/CsaV3_6G040330/CsaV3_6G040430/CsaV3_3G007170/CsaV3_2G028640/CsaV3_1G035920/CsaV3_2G030420/CsaV3_6G048680/CsaV3_6G040340	CsaV3_3G021780/CsaV3_6G013500/CsaV3_3G027630/CsaV3_2G013320/CsaV3_3G036910/CsaV3_1G046070/CsaV3_6G048080/CsaV3_5G028690/CsaV3_7G022930/CsaV3_3G023460/CsaV3_6G040390/CsaV3_4G037690/CsaV3_5G029170/CsaV3_6G040330/CsaV3_6G040430/CsaV3_3G007170/CsaV3_2G028640/CsaV3_1G035920/CsaV3_2G030420/CsaV3_6G048680/CsaV3_6G040340	21	19	CsaV3_3G021780/CsaV3_6G013500/CsaV3_3G027630/CsaV3_2G013320/CsaV3_3G036910/CsaV3_1G046070/CsaV3_5G028690/CsaV3_7G022930/CsaV3_6G040390/CsaV3_4G037690/CsaV3_5G029170/CsaV3_6G040330/CsaV3_6G040430/CsaV3_3G007170/CsaV3_2G028640/CsaV3_1G035920/CsaV3_2G030420/CsaV3_6G048680/CsaV3_6G040340	2	CsaV3_6G048080/CsaV3_3G023460
BP	GO:0006754	ATP biosynthetic process	29/2462	45/5903	0.0016861	0.026086	CsaV3_3G021780/CsaV3_6G013500/CsaV3_2G013320/CsaV3_3G036910/CsaV3_6G002740/CsaV3_1G046070/CsaV3_5G034810/CsaV3_1G005960/CsaV3_6G048080/CsaV3_5G028690/CsaV3_7G022930/CsaV3_3G010470/CsaV3_3G023460/CsaV3_1G010750/CsaV3_6G040390/CsaV3_4G037690/CsaV3_5G029170/CsaV3_7G031080/CsaV3_5G036470/CsaV3_6G040330/CsaV3_6G040430/CsaV3_3G007840/CsaV3_UNG052430/CsaV3_2G001570/CsaV3_2G028640/CsaV3_1G035920/CsaV3_2G…	CsaV3_3G021780/CsaV3_6G013500/CsaV3_2G013320/CsaV3_3G036910/CsaV3_6G002740/CsaV3_1G046070/CsaV3_5G034810/CsaV3_1G005960/CsaV3_6G048080/CsaV3_5G028690/CsaV3_7G022930/CsaV3_3G010470/CsaV3_3G023460/CsaV3_1G010750/CsaV3_6G040390/CsaV3_4G037690/CsaV3_5G029170/CsaV3_7G031080/CsaV3_5G036470/CsaV3_6G040330/CsaV3_6G040430/CsaV3_3G007840/CsaV3_UNG052430/CsaV3_2G001570/CsaV3_2G028640/CsaV3_1G035920/CsaV3_2G…	29	25	CsaV3_3G021780/CsaV3_6G013500/CsaV3_2G013320/CsaV3_3G036910/CsaV3_6G002740/CsaV3_1G046070/CsaV3_5G034810/CsaV3_1G005960/CsaV3_5G028690/CsaV3_7G022930/CsaV3_3G010470/CsaV3_6G040390/CsaV3_4G037690/CsaV3_5G029170/CsaV3_7G031080/CsaV3_5G036470/CsaV3_6G040330/CsaV3_6G040430/CsaV3_UNG052430/CsaV3_2G001570/CsaV3_2G028640/CsaV3_1G035920/CsaV3_2G030420/CsaV3_6G048680/CsaV3_6G040340	4	CsaV3_6G048080/CsaV3_3G023460/CsaV3_1G010750/CsaV3_3G007840
BP	GO:0009142	nucleoside triphosphate biosynthetic process	30/2462	47/5903	0.00176427	0.026086	CsaV3_3G021780/CsaV3_6G013500/CsaV3_2G013320/CsaV3_3G036910/CsaV3_6G002740/CsaV3_1G046070/CsaV3_5G034810/CsaV3_1G005960/CsaV3_6G048080/CsaV3_5G028690/CsaV3_7G022930/CsaV3_3G010470/CsaV3_3G023460/CsaV3_1G010750/CsaV3_6G040390/CsaV3_4G037690/CsaV3_5G029170/CsaV3_7G031080/CsaV3_5G036470/CsaV3_6G040330/CsaV3_6G040430/CsaV3_3G007840/CsaV3_3G007170/CsaV3_UNG052430/CsaV3_2G001570/CsaV3_2G028640/CsaV3_1G…	CsaV3_3G021780/CsaV3_6G013500/CsaV3_2G013320/CsaV3_3G036910/CsaV3_6G002740/CsaV3_1G046070/CsaV3_5G034810/CsaV3_1G005960/CsaV3_6G048080/CsaV3_5G028690/CsaV3_7G022930/CsaV3_3G010470/CsaV3_3G023460/CsaV3_1G010750/CsaV3_6G040390/CsaV3_4G037690/CsaV3_5G029170/CsaV3_7G031080/CsaV3_5G036470/CsaV3_6G040330/CsaV3_6G040430/CsaV3_3G007840/CsaV3_3G007170/CsaV3_UNG052430/CsaV3_2G001570/CsaV3_2G028640/CsaV3_1G…	30	26	CsaV3_3G021780/CsaV3_6G013500/CsaV3_2G013320/CsaV3_3G036910/CsaV3_6G002740/CsaV3_1G046070/CsaV3_5G034810/CsaV3_1G005960/CsaV3_5G028690/CsaV3_7G022930/CsaV3_3G010470/CsaV3_6G040390/CsaV3_4G037690/CsaV3_5G029170/CsaV3_7G031080/CsaV3_5G036470/CsaV3_6G040330/CsaV3_6G040430/CsaV3_3G007170/CsaV3_UNG052430/CsaV3_2G001570/CsaV3_2G028640/CsaV3_1G035920/CsaV3_2G030420/CsaV3_6G048680/CsaV3_6G040340	4	CsaV3_6G048080/CsaV3_3G023460/CsaV3_1G010750/CsaV3_3G007840
BP	GO:0009145	purine nucleoside triphosphate biosynthetic process	30/2462	47/5903	0.00176427	0.026086	CsaV3_3G021780/CsaV3_6G013500/CsaV3_2G013320/CsaV3_3G036910/CsaV3_6G002740/CsaV3_1G046070/CsaV3_5G034810/CsaV3_1G005960/CsaV3_6G048080/CsaV3_5G028690/CsaV3_7G022930/CsaV3_3G010470/CsaV3_3G023460/CsaV3_1G010750/CsaV3_6G040390/CsaV3_4G037690/CsaV3_5G029170/CsaV3_7G031080/CsaV3_5G036470/CsaV3_6G040330/CsaV3_6G040430/CsaV3_3G007840/CsaV3_3G007170/CsaV3_UNG052430/CsaV3_2G001570/CsaV3_2G028640/CsaV3_1G…	CsaV3_3G021780/CsaV3_6G013500/CsaV3_2G013320/CsaV3_3G036910/CsaV3_6G002740/CsaV3_1G046070/CsaV3_5G034810/CsaV3_1G005960/CsaV3_6G048080/CsaV3_5G028690/CsaV3_7G022930/CsaV3_3G010470/CsaV3_3G023460/CsaV3_1G010750/CsaV3_6G040390/CsaV3_4G037690/CsaV3_5G029170/CsaV3_7G031080/CsaV3_5G036470/CsaV3_6G040330/CsaV3_6G040430/CsaV3_3G007840/CsaV3_3G007170/CsaV3_UNG052430/CsaV3_2G001570/CsaV3_2G028640/CsaV3_1G…	30	26	CsaV3_3G021780/CsaV3_6G013500/CsaV3_2G013320/CsaV3_3G036910/CsaV3_6G002740/CsaV3_1G046070/CsaV3_5G034810/CsaV3_1G005960/CsaV3_5G028690/CsaV3_7G022930/CsaV3_3G010470/CsaV3_6G040390/CsaV3_4G037690/CsaV3_5G029170/CsaV3_7G031080/CsaV3_5G036470/CsaV3_6G040330/CsaV3_6G040430/CsaV3_3G007170/CsaV3_UNG052430/CsaV3_2G001570/CsaV3_2G028640/CsaV3_1G035920/CsaV3_2G030420/CsaV3_6G048680/CsaV3_6G040340	4	CsaV3_6G048080/CsaV3_3G023460/CsaV3_1G010750/CsaV3_3G007840
BP	GO:0009201	ribonucleoside triphosphate biosynthetic process	30/2462	47/5903	0.00176427	0.026086	CsaV3_3G021780/CsaV3_6G013500/CsaV3_2G013320/CsaV3_3G036910/CsaV3_6G002740/CsaV3_1G046070/CsaV3_5G034810/CsaV3_1G005960/CsaV3_6G048080/CsaV3_5G028690/CsaV3_7G022930/CsaV3_3G010470/CsaV3_3G023460/CsaV3_1G010750/CsaV3_6G040390/CsaV3_4G037690/CsaV3_5G029170/CsaV3_7G031080/CsaV3_5G036470/CsaV3_6G040330/CsaV3_6G040430/CsaV3_3G007840/CsaV3_3G007170/CsaV3_UNG052430/CsaV3_2G001570/CsaV3_2G028640/CsaV3_1G…	CsaV3_3G021780/CsaV3_6G013500/CsaV3_2G013320/CsaV3_3G036910/CsaV3_6G002740/CsaV3_1G046070/CsaV3_5G034810/CsaV3_1G005960/CsaV3_6G048080/CsaV3_5G028690/CsaV3_7G022930/CsaV3_3G010470/CsaV3_3G023460/CsaV3_1G010750/CsaV3_6G040390/CsaV3_4G037690/CsaV3_5G029170/CsaV3_7G031080/CsaV3_5G036470/CsaV3_6G040330/CsaV3_6G040430/CsaV3_3G007840/CsaV3_3G007170/CsaV3_UNG052430/CsaV3_2G001570/CsaV3_2G028640/CsaV3_1G…	30	26	CsaV3_3G021780/CsaV3_6G013500/CsaV3_2G013320/CsaV3_3G036910/CsaV3_6G002740/CsaV3_1G046070/CsaV3_5G034810/CsaV3_1G005960/CsaV3_5G028690/CsaV3_7G022930/CsaV3_3G010470/CsaV3_6G040390/CsaV3_4G037690/CsaV3_5G029170/CsaV3_7G031080/CsaV3_5G036470/CsaV3_6G040330/CsaV3_6G040430/CsaV3_3G007170/CsaV3_UNG052430/CsaV3_2G001570/CsaV3_2G028640/CsaV3_1G035920/CsaV3_2G030420/CsaV3_6G048680/CsaV3_6G040340	4	CsaV3_6G048080/CsaV3_3G023460/CsaV3_1G010750/CsaV3_3G007840
BP	GO:0009206	purine ribonucleoside triphosphate biosynthetic process	30/2462	47/5903	0.00176427	0.026086	CsaV3_3G021780/CsaV3_6G013500/CsaV3_2G013320/CsaV3_3G036910/CsaV3_6G002740/CsaV3_1G046070/CsaV3_5G034810/CsaV3_1G005960/CsaV3_6G048080/CsaV3_5G028690/CsaV3_7G022930/CsaV3_3G010470/CsaV3_3G023460/CsaV3_1G010750/CsaV3_6G040390/CsaV3_4G037690/CsaV3_5G029170/CsaV3_7G031080/CsaV3_5G036470/CsaV3_6G040330/CsaV3_6G040430/CsaV3_3G007840/CsaV3_3G007170/CsaV3_UNG052430/CsaV3_2G001570/CsaV3_2G028640/CsaV3_1G…	CsaV3_3G021780/CsaV3_6G013500/CsaV3_2G013320/CsaV3_3G036910/CsaV3_6G002740/CsaV3_1G046070/CsaV3_5G034810/CsaV3_1G005960/CsaV3_6G048080/CsaV3_5G028690/CsaV3_7G022930/CsaV3_3G010470/CsaV3_3G023460/CsaV3_1G010750/CsaV3_6G040390/CsaV3_4G037690/CsaV3_5G029170/CsaV3_7G031080/CsaV3_5G036470/CsaV3_6G040330/CsaV3_6G040430/CsaV3_3G007840/CsaV3_3G007170/CsaV3_UNG052430/CsaV3_2G001570/CsaV3_2G028640/CsaV3_1G…	30	26	CsaV3_3G021780/CsaV3_6G013500/CsaV3_2G013320/CsaV3_3G036910/CsaV3_6G002740/CsaV3_1G046070/CsaV3_5G034810/CsaV3_1G005960/CsaV3_5G028690/CsaV3_7G022930/CsaV3_3G010470/CsaV3_6G040390/CsaV3_4G037690/CsaV3_5G029170/CsaV3_7G031080/CsaV3_5G036470/CsaV3_6G040330/CsaV3_6G040430/CsaV3_3G007170/CsaV3_UNG052430/CsaV3_2G001570/CsaV3_2G028640/CsaV3_1G035920/CsaV3_2G030420/CsaV3_6G048680/CsaV3_6G040340	4	CsaV3_6G048080/CsaV3_3G023460/CsaV3_1G010750/CsaV3_3G007840
BP	GO:0019693	ribose phosphate metabolic process	43/2462	73/5903	0.0021461	0.027798	CsaV3_5G034910/CsaV3_2G033180/CsaV3_5G002770/CsaV3_3G021780/CsaV3_4G006330/CsaV3_6G013500/CsaV3_2G013320/CsaV3_6G009990/CsaV3_3G036910/CsaV3_6G002740/CsaV3_1G046070/CsaV3_5G034810/CsaV3_1G005960/CsaV3_6G048080/CsaV3_5G028690/CsaV3_5G008870/CsaV3_7G022930/CsaV3_1G037750/CsaV3_3G010470/CsaV3_3G023460/CsaV3_1G010750/CsaV3_6G040390/CsaV3_4G037690/CsaV3_4G008710/CsaV3_5G029170/CsaV3_7G031080/CsaV3_5G0…	CsaV3_5G034910/CsaV3_2G033180/CsaV3_5G002770/CsaV3_3G021780/CsaV3_4G006330/CsaV3_6G013500/CsaV3_2G013320/CsaV3_6G009990/CsaV3_3G036910/CsaV3_6G002740/CsaV3_1G046070/CsaV3_5G034810/CsaV3_1G005960/CsaV3_6G048080/CsaV3_5G028690/CsaV3_5G008870/CsaV3_7G022930/CsaV3_1G037750/CsaV3_3G010470/CsaV3_3G023460/CsaV3_1G010750/CsaV3_6G040390/CsaV3_4G037690/CsaV3_4G008710/CsaV3_5G029170/CsaV3_7G031080/CsaV3_5G0…	43	34	CsaV3_2G033180/CsaV3_5G002770/CsaV3_3G021780/CsaV3_4G006330/CsaV3_6G013500/CsaV3_2G013320/CsaV3_3G036910/CsaV3_6G002740/CsaV3_1G046070/CsaV3_5G034810/CsaV3_1G005960/CsaV3_5G028690/CsaV3_5G008870/CsaV3_7G022930/CsaV3_1G037750/CsaV3_3G010470/CsaV3_6G040390/CsaV3_4G037690/CsaV3_5G029170/CsaV3_7G031080/CsaV3_5G036470/CsaV3_6G040330/CsaV3_6G040430/CsaV3_UNG203700/CsaV3_3G007170/CsaV3_UNG052430/CsaV3_2…	9	CsaV3_5G034910/CsaV3_6G009990/CsaV3_6G048080/CsaV3_3G023460/CsaV3_1G010750/CsaV3_4G008710/CsaV3_4G000530/CsaV3_3G007840/CsaV3_6G035980
BP	GO:0006096	glycolytic process	19/2462	27/5903	0.00241722	0.027798	CsaV3_3G021780/CsaV3_6G013500/CsaV3_2G013320/CsaV3_3G036910/CsaV3_1G046070/CsaV3_6G048080/CsaV3_5G028690/CsaV3_7G022930/CsaV3_3G023460/CsaV3_6G040390/CsaV3_4G037690/CsaV3_5G029170/CsaV3_6G040330/CsaV3_6G040430/CsaV3_2G028640/CsaV3_1G035920/CsaV3_2G030420/CsaV3_6G048680/CsaV3_6G040340	CsaV3_3G021780/CsaV3_6G013500/CsaV3_2G013320/CsaV3_3G036910/CsaV3_1G046070/CsaV3_6G048080/CsaV3_5G028690/CsaV3_7G022930/CsaV3_3G023460/CsaV3_6G040390/CsaV3_4G037690/CsaV3_5G029170/CsaV3_6G040330/CsaV3_6G040430/CsaV3_2G028640/CsaV3_1G035920/CsaV3_2G030420/CsaV3_6G048680/CsaV3_6G040340	19	17	CsaV3_3G021780/CsaV3_6G013500/CsaV3_2G013320/CsaV3_3G036910/CsaV3_1G046070/CsaV3_5G028690/CsaV3_7G022930/CsaV3_6G040390/CsaV3_4G037690/CsaV3_5G029170/CsaV3_6G040330/CsaV3_6G040430/CsaV3_2G028640/CsaV3_1G035920/CsaV3_2G030420/CsaV3_6G048680/CsaV3_6G040340	2	CsaV3_6G048080/CsaV3_3G023460
BP	GO:0006757	ATP generation from ADP	19/2462	27/5903	0.00241722	0.027798	CsaV3_3G021780/CsaV3_6G013500/CsaV3_2G013320/CsaV3_3G036910/CsaV3_1G046070/CsaV3_6G048080/CsaV3_5G028690/CsaV3_7G022930/CsaV3_3G023460/CsaV3_6G040390/CsaV3_4G037690/CsaV3_5G029170/CsaV3_6G040330/CsaV3_6G040430/CsaV3_2G028640/CsaV3_1G035920/CsaV3_2G030420/CsaV3_6G048680/CsaV3_6G040340	CsaV3_3G021780/CsaV3_6G013500/CsaV3_2G013320/CsaV3_3G036910/CsaV3_1G046070/CsaV3_6G048080/CsaV3_5G028690/CsaV3_7G022930/CsaV3_3G023460/CsaV3_6G040390/CsaV3_4G037690/CsaV3_5G029170/CsaV3_6G040330/CsaV3_6G040430/CsaV3_2G028640/CsaV3_1G035920/CsaV3_2G030420/CsaV3_6G048680/CsaV3_6G040340	19	17	CsaV3_3G021780/CsaV3_6G013500/CsaV3_2G013320/CsaV3_3G036910/CsaV3_1G046070/CsaV3_5G028690/CsaV3_7G022930/CsaV3_6G040390/CsaV3_4G037690/CsaV3_5G029170/CsaV3_6G040330/CsaV3_6G040430/CsaV3_2G028640/CsaV3_1G035920/CsaV3_2G030420/CsaV3_6G048680/CsaV3_6G040340	2	CsaV3_6G048080/CsaV3_3G023460
BP	GO:0009135	purine nucleoside diphosphate metabolic process	19/2462	27/5903	0.00241722	0.027798	CsaV3_3G021780/CsaV3_6G013500/CsaV3_2G013320/CsaV3_3G036910/CsaV3_1G046070/CsaV3_6G048080/CsaV3_5G028690/CsaV3_7G022930/CsaV3_3G023460/CsaV3_6G040390/CsaV3_4G037690/CsaV3_5G029170/CsaV3_6G040330/CsaV3_6G040430/CsaV3_2G028640/CsaV3_1G035920/CsaV3_2G030420/CsaV3_6G048680/CsaV3_6G040340	CsaV3_3G021780/CsaV3_6G013500/CsaV3_2G013320/CsaV3_3G036910/CsaV3_1G046070/CsaV3_6G048080/CsaV3_5G028690/CsaV3_7G022930/CsaV3_3G023460/CsaV3_6G040390/CsaV3_4G037690/CsaV3_5G029170/CsaV3_6G040330/CsaV3_6G040430/CsaV3_2G028640/CsaV3_1G035920/CsaV3_2G030420/CsaV3_6G048680/CsaV3_6G040340	19	17	CsaV3_3G021780/CsaV3_6G013500/CsaV3_2G013320/CsaV3_3G036910/CsaV3_1G046070/CsaV3_5G028690/CsaV3_7G022930/CsaV3_6G040390/CsaV3_4G037690/CsaV3_5G029170/CsaV3_6G040330/CsaV3_6G040430/CsaV3_2G028640/CsaV3_1G035920/CsaV3_2G030420/CsaV3_6G048680/CsaV3_6G040340	2	CsaV3_6G048080/CsaV3_3G023460
BP	GO:0009179	purine ribonucleoside diphosphate metabolic process	19/2462	27/5903	0.00241722	0.027798	CsaV3_3G021780/CsaV3_6G013500/CsaV3_2G013320/CsaV3_3G036910/CsaV3_1G046070/CsaV3_6G048080/CsaV3_5G028690/CsaV3_7G022930/CsaV3_3G023460/CsaV3_6G040390/CsaV3_4G037690/CsaV3_5G029170/CsaV3_6G040330/CsaV3_6G040430/CsaV3_2G028640/CsaV3_1G035920/CsaV3_2G030420/CsaV3_6G048680/CsaV3_6G040340	CsaV3_3G021780/CsaV3_6G013500/CsaV3_2G013320/CsaV3_3G036910/CsaV3_1G046070/CsaV3_6G048080/CsaV3_5G028690/CsaV3_7G022930/CsaV3_3G023460/CsaV3_6G040390/CsaV3_4G037690/CsaV3_5G029170/CsaV3_6G040330/CsaV3_6G040430/CsaV3_2G028640/CsaV3_1G035920/CsaV3_2G030420/CsaV3_6G048680/CsaV3_6G040340	19	17	CsaV3_3G021780/CsaV3_6G013500/CsaV3_2G013320/CsaV3_3G036910/CsaV3_1G046070/CsaV3_5G028690/CsaV3_7G022930/CsaV3_6G040390/CsaV3_4G037690/CsaV3_5G029170/CsaV3_6G040330/CsaV3_6G040430/CsaV3_2G028640/CsaV3_1G035920/CsaV3_2G030420/CsaV3_6G048680/CsaV3_6G040340	2	CsaV3_6G048080/CsaV3_3G023460
BP	GO:0009185	ribonucleoside diphosphate metabolic process	19/2462	27/5903	0.00241722	0.027798	CsaV3_3G021780/CsaV3_6G013500/CsaV3_2G013320/CsaV3_3G036910/CsaV3_1G046070/CsaV3_6G048080/CsaV3_5G028690/CsaV3_7G022930/CsaV3_3G023460/CsaV3_6G040390/CsaV3_4G037690/CsaV3_5G029170/CsaV3_6G040330/CsaV3_6G040430/CsaV3_2G028640/CsaV3_1G035920/CsaV3_2G030420/CsaV3_6G048680/CsaV3_6G040340	CsaV3_3G021780/CsaV3_6G013500/CsaV3_2G013320/CsaV3_3G036910/CsaV3_1G046070/CsaV3_6G048080/CsaV3_5G028690/CsaV3_7G022930/CsaV3_3G023460/CsaV3_6G040390/CsaV3_4G037690/CsaV3_5G029170/CsaV3_6G040330/CsaV3_6G040430/CsaV3_2G028640/CsaV3_1G035920/CsaV3_2G030420/CsaV3_6G048680/CsaV3_6G040340	19	17	CsaV3_3G021780/CsaV3_6G013500/CsaV3_2G013320/CsaV3_3G036910/CsaV3_1G046070/CsaV3_5G028690/CsaV3_7G022930/CsaV3_6G040390/CsaV3_4G037690/CsaV3_5G029170/CsaV3_6G040330/CsaV3_6G040430/CsaV3_2G028640/CsaV3_1G035920/CsaV3_2G030420/CsaV3_6G048680/CsaV3_6G040340	2	CsaV3_6G048080/CsaV3_3G023460
BP	GO:0042866	pyruvate biosynthetic process	19/2462	27/5903	0.00241722	0.027798	CsaV3_3G021780/CsaV3_6G013500/CsaV3_2G013320/CsaV3_3G036910/CsaV3_1G046070/CsaV3_6G048080/CsaV3_5G028690/CsaV3_7G022930/CsaV3_3G023460/CsaV3_6G040390/CsaV3_4G037690/CsaV3_5G029170/CsaV3_6G040330/CsaV3_6G040430/CsaV3_2G028640/CsaV3_1G035920/CsaV3_2G030420/CsaV3_6G048680/CsaV3_6G040340	CsaV3_3G021780/CsaV3_6G013500/CsaV3_2G013320/CsaV3_3G036910/CsaV3_1G046070/CsaV3_6G048080/CsaV3_5G028690/CsaV3_7G022930/CsaV3_3G023460/CsaV3_6G040390/CsaV3_4G037690/CsaV3_5G029170/CsaV3_6G040330/CsaV3_6G040430/CsaV3_2G028640/CsaV3_1G035920/CsaV3_2G030420/CsaV3_6G048680/CsaV3_6G040340	19	17	CsaV3_3G021780/CsaV3_6G013500/CsaV3_2G013320/CsaV3_3G036910/CsaV3_1G046070/CsaV3_5G028690/CsaV3_7G022930/CsaV3_6G040390/CsaV3_4G037690/CsaV3_5G029170/CsaV3_6G040330/CsaV3_6G040430/CsaV3_2G028640/CsaV3_1G035920/CsaV3_2G030420/CsaV3_6G048680/CsaV3_6G040340	2	CsaV3_6G048080/CsaV3_3G023460
BP	GO:0046031	ADP metabolic process	19/2462	27/5903	0.00241722	0.027798	CsaV3_3G021780/CsaV3_6G013500/CsaV3_2G013320/CsaV3_3G036910/CsaV3_1G046070/CsaV3_6G048080/CsaV3_5G028690/CsaV3_7G022930/CsaV3_3G023460/CsaV3_6G040390/CsaV3_4G037690/CsaV3_5G029170/CsaV3_6G040330/CsaV3_6G040430/CsaV3_2G028640/CsaV3_1G035920/CsaV3_2G030420/CsaV3_6G048680/CsaV3_6G040340	CsaV3_3G021780/CsaV3_6G013500/CsaV3_2G013320/CsaV3_3G036910/CsaV3_1G046070/CsaV3_6G048080/CsaV3_5G028690/CsaV3_7G022930/CsaV3_3G023460/CsaV3_6G040390/CsaV3_4G037690/CsaV3_5G029170/CsaV3_6G040330/CsaV3_6G040430/CsaV3_2G028640/CsaV3_1G035920/CsaV3_2G030420/CsaV3_6G048680/CsaV3_6G040340	19	17	CsaV3_3G021780/CsaV3_6G013500/CsaV3_2G013320/CsaV3_3G036910/CsaV3_1G046070/CsaV3_5G028690/CsaV3_7G022930/CsaV3_6G040390/CsaV3_4G037690/CsaV3_5G029170/CsaV3_6G040330/CsaV3_6G040430/CsaV3_2G028640/CsaV3_1G035920/CsaV3_2G030420/CsaV3_6G048680/CsaV3_6G040340	2	CsaV3_6G048080/CsaV3_3G023460
BP	GO:0019752	carboxylic acid metabolic process	112/2462	219/5903	0.00257068	0.0287638	CsaV3_3G010300/CsaV3_6G030990/CsaV3_3G043270/CsaV3_6G006560/CsaV3_3G009100/CsaV3_2G033820/CsaV3_7G005980/CsaV3_5G013970/CsaV3_5G039900/CsaV3_2G003740/CsaV3_6G014760/CsaV3_2G003300/CsaV3_3G021780/CsaV3_3G004920/CsaV3_7G018620/CsaV3_5G015730/CsaV3_6G040120/CsaV3_2G013730/CsaV3_6G013500/CsaV3_2G007090/CsaV3_7G008280/CsaV3_UNG002020/CsaV3_6G047800/CsaV3_1G012830/CsaV3_6G040130/CsaV3_2G013320/CsaV3_3G…	CsaV3_3G010300/CsaV3_6G030990/CsaV3_3G043270/CsaV3_6G006560/CsaV3_3G009100/CsaV3_2G033820/CsaV3_7G005980/CsaV3_5G013970/CsaV3_5G039900/CsaV3_2G003740/CsaV3_6G014760/CsaV3_2G003300/CsaV3_3G021780/CsaV3_3G004920/CsaV3_7G018620/CsaV3_5G015730/CsaV3_6G040120/CsaV3_2G013730/CsaV3_6G013500/CsaV3_2G007090/CsaV3_7G008280/CsaV3_UNG002020/CsaV3_6G047800/CsaV3_1G012830/CsaV3_6G040130/CsaV3_2G013320/CsaV3_3G…	112	82	CsaV3_3G010300/CsaV3_6G030990/CsaV3_3G043270/CsaV3_6G006560/CsaV3_3G009100/CsaV3_7G005980/CsaV3_5G013970/CsaV3_5G039900/CsaV3_6G014760/CsaV3_2G003300/CsaV3_3G021780/CsaV3_3G004920/CsaV3_5G015730/CsaV3_2G013730/CsaV3_6G013500/CsaV3_1G012830/CsaV3_2G013320/CsaV3_3G004760/CsaV3_2G010260/CsaV3_6G048760/CsaV3_4G025950/CsaV3_3G036910/CsaV3_4G033150/CsaV3_1G046070/CsaV3_5G003990/CsaV3_3G045350/CsaV3_5G0…	30	CsaV3_2G033820/CsaV3_2G003740/CsaV3_7G018620/CsaV3_6G040120/CsaV3_2G007090/CsaV3_7G008280/CsaV3_UNG002020/CsaV3_6G047800/CsaV3_6G040130/CsaV3_1G038260/CsaV3_5G005130/CsaV3_1G045310/CsaV3_6G048080/CsaV3_3G012730/novel.201/CsaV3_6G016090/CsaV3_3G023460/CsaV3_5G017290/CsaV3_6G022310/CsaV3_5G023920/CsaV3_4G008430/CsaV3_1G030920/CsaV3_5G032610/CsaV3_6G045310/CsaV3_5G038370/CsaV3_2G028690/CsaV3_2G01067…
BP	GO:0006165	nucleoside diphosphate phosphorylation	20/2462	29/5903	0.00272055	0.0288797	CsaV3_3G021780/CsaV3_6G013500/CsaV3_2G013320/CsaV3_3G036910/CsaV3_1G046070/CsaV3_6G048080/CsaV3_5G028690/CsaV3_7G022930/CsaV3_3G023460/CsaV3_6G040390/CsaV3_4G037690/CsaV3_5G029170/CsaV3_6G040330/CsaV3_6G040430/CsaV3_3G007170/CsaV3_2G028640/CsaV3_1G035920/CsaV3_2G030420/CsaV3_6G048680/CsaV3_6G040340	CsaV3_3G021780/CsaV3_6G013500/CsaV3_2G013320/CsaV3_3G036910/CsaV3_1G046070/CsaV3_6G048080/CsaV3_5G028690/CsaV3_7G022930/CsaV3_3G023460/CsaV3_6G040390/CsaV3_4G037690/CsaV3_5G029170/CsaV3_6G040330/CsaV3_6G040430/CsaV3_3G007170/CsaV3_2G028640/CsaV3_1G035920/CsaV3_2G030420/CsaV3_6G048680/CsaV3_6G040340	20	18	CsaV3_3G021780/CsaV3_6G013500/CsaV3_2G013320/CsaV3_3G036910/CsaV3_1G046070/CsaV3_5G028690/CsaV3_7G022930/CsaV3_6G040390/CsaV3_4G037690/CsaV3_5G029170/CsaV3_6G040330/CsaV3_6G040430/CsaV3_3G007170/CsaV3_2G028640/CsaV3_1G035920/CsaV3_2G030420/CsaV3_6G048680/CsaV3_6G040340	2	CsaV3_6G048080/CsaV3_3G023460
BP	GO:0046939	nucleotide phosphorylation	20/2462	29/5903	0.00272055	0.0288797	CsaV3_3G021780/CsaV3_6G013500/CsaV3_2G013320/CsaV3_3G036910/CsaV3_1G046070/CsaV3_6G048080/CsaV3_5G028690/CsaV3_7G022930/CsaV3_3G023460/CsaV3_6G040390/CsaV3_4G037690/CsaV3_5G029170/CsaV3_6G040330/CsaV3_6G040430/CsaV3_3G007170/CsaV3_2G028640/CsaV3_1G035920/CsaV3_2G030420/CsaV3_6G048680/CsaV3_6G040340	CsaV3_3G021780/CsaV3_6G013500/CsaV3_2G013320/CsaV3_3G036910/CsaV3_1G046070/CsaV3_6G048080/CsaV3_5G028690/CsaV3_7G022930/CsaV3_3G023460/CsaV3_6G040390/CsaV3_4G037690/CsaV3_5G029170/CsaV3_6G040330/CsaV3_6G040430/CsaV3_3G007170/CsaV3_2G028640/CsaV3_1G035920/CsaV3_2G030420/CsaV3_6G048680/CsaV3_6G040340	20	18	CsaV3_3G021780/CsaV3_6G013500/CsaV3_2G013320/CsaV3_3G036910/CsaV3_1G046070/CsaV3_5G028690/CsaV3_7G022930/CsaV3_6G040390/CsaV3_4G037690/CsaV3_5G029170/CsaV3_6G040330/CsaV3_6G040430/CsaV3_3G007170/CsaV3_2G028640/CsaV3_1G035920/CsaV3_2G030420/CsaV3_6G048680/CsaV3_6G040340	2	CsaV3_6G048080/CsaV3_3G023460
BP	GO:0006091	generation of precursor metabolites and energy	30/2462	48/5903	0.00284592	0.0291585	CsaV3_6G042680/CsaV3_3G021780/CsaV3_6G013500/CsaV3_7G004070/CsaV3_2G013320/CsaV3_3G036910/CsaV3_4G033150/CsaV3_1G046070/CsaV3_2G024700/CsaV3_3G017590/CsaV3_6G048080/CsaV3_5G028690/CsaV3_7G022930/CsaV3_3G023460/CsaV3_7G004300/CsaV3_4G001010/CsaV3_6G040390/CsaV3_4G037690/CsaV3_5G029170/CsaV3_1G025480/CsaV3_5G015800/CsaV3_6G040330/CsaV3_6G040430/CsaV3_7G022520/CsaV3_2G028640/CsaV3_7G005670/CsaV3_1G0…	CsaV3_6G042680/CsaV3_3G021780/CsaV3_6G013500/CsaV3_7G004070/CsaV3_2G013320/CsaV3_3G036910/CsaV3_4G033150/CsaV3_1G046070/CsaV3_2G024700/CsaV3_3G017590/CsaV3_6G048080/CsaV3_5G028690/CsaV3_7G022930/CsaV3_3G023460/CsaV3_7G004300/CsaV3_4G001010/CsaV3_6G040390/CsaV3_4G037690/CsaV3_5G029170/CsaV3_1G025480/CsaV3_5G015800/CsaV3_6G040330/CsaV3_6G040430/CsaV3_7G022520/CsaV3_2G028640/CsaV3_7G005670/CsaV3_1G0…	30	27	CsaV3_6G042680/CsaV3_3G021780/CsaV3_6G013500/CsaV3_7G004070/CsaV3_2G013320/CsaV3_3G036910/CsaV3_4G033150/CsaV3_1G046070/CsaV3_2G024700/CsaV3_3G017590/CsaV3_5G028690/CsaV3_7G022930/CsaV3_7G004300/CsaV3_4G001010/CsaV3_6G040390/CsaV3_4G037690/CsaV3_5G029170/CsaV3_1G025480/CsaV3_6G040330/CsaV3_6G040430/CsaV3_7G022520/CsaV3_2G028640/CsaV3_7G005670/CsaV3_1G035920/CsaV3_2G030420/CsaV3_6G048680/CsaV3_6G0…	3	CsaV3_6G048080/CsaV3_3G023460/CsaV3_5G015800
BP	GO:0009126	purine nucleoside monophosphate metabolic process	33/2462	54/5903	0.00302854	0.0291585	CsaV3_2G033180/CsaV3_5G002770/CsaV3_3G021780/CsaV3_6G013500/CsaV3_2G013320/CsaV3_3G036910/CsaV3_6G002740/CsaV3_1G046070/CsaV3_5G034810/CsaV3_1G005960/CsaV3_6G048080/CsaV3_5G028690/CsaV3_5G008870/CsaV3_7G022930/CsaV3_3G010470/CsaV3_3G023460/CsaV3_1G010750/CsaV3_6G040390/CsaV3_4G037690/CsaV3_5G029170/CsaV3_7G031080/CsaV3_5G036470/CsaV3_6G040330/CsaV3_6G040430/CsaV3_3G007840/CsaV3_UNG203700/CsaV3_UN…	CsaV3_2G033180/CsaV3_5G002770/CsaV3_3G021780/CsaV3_6G013500/CsaV3_2G013320/CsaV3_3G036910/CsaV3_6G002740/CsaV3_1G046070/CsaV3_5G034810/CsaV3_1G005960/CsaV3_6G048080/CsaV3_5G028690/CsaV3_5G008870/CsaV3_7G022930/CsaV3_3G010470/CsaV3_3G023460/CsaV3_1G010750/CsaV3_6G040390/CsaV3_4G037690/CsaV3_5G029170/CsaV3_7G031080/CsaV3_5G036470/CsaV3_6G040330/CsaV3_6G040430/CsaV3_3G007840/CsaV3_UNG203700/CsaV3_UN…	33	29	CsaV3_2G033180/CsaV3_5G002770/CsaV3_3G021780/CsaV3_6G013500/CsaV3_2G013320/CsaV3_3G036910/CsaV3_6G002740/CsaV3_1G046070/CsaV3_5G034810/CsaV3_1G005960/CsaV3_5G028690/CsaV3_5G008870/CsaV3_7G022930/CsaV3_3G010470/CsaV3_6G040390/CsaV3_4G037690/CsaV3_5G029170/CsaV3_7G031080/CsaV3_5G036470/CsaV3_6G040330/CsaV3_6G040430/CsaV3_UNG203700/CsaV3_UNG052430/CsaV3_2G001570/CsaV3_2G028640/CsaV3_1G035920/CsaV3_2…	4	CsaV3_6G048080/CsaV3_3G023460/CsaV3_1G010750/CsaV3_3G007840
BP	GO:0009161	ribonucleoside monophosphate metabolic process	33/2462	54/5903	0.00302854	0.0291585	CsaV3_2G033180/CsaV3_5G002770/CsaV3_3G021780/CsaV3_6G013500/CsaV3_2G013320/CsaV3_3G036910/CsaV3_6G002740/CsaV3_1G046070/CsaV3_5G034810/CsaV3_1G005960/CsaV3_6G048080/CsaV3_5G028690/CsaV3_5G008870/CsaV3_7G022930/CsaV3_3G010470/CsaV3_3G023460/CsaV3_1G010750/CsaV3_6G040390/CsaV3_4G037690/CsaV3_5G029170/CsaV3_7G031080/CsaV3_5G036470/CsaV3_6G040330/CsaV3_6G040430/CsaV3_3G007840/CsaV3_UNG203700/CsaV3_UN…	CsaV3_2G033180/CsaV3_5G002770/CsaV3_3G021780/CsaV3_6G013500/CsaV3_2G013320/CsaV3_3G036910/CsaV3_6G002740/CsaV3_1G046070/CsaV3_5G034810/CsaV3_1G005960/CsaV3_6G048080/CsaV3_5G028690/CsaV3_5G008870/CsaV3_7G022930/CsaV3_3G010470/CsaV3_3G023460/CsaV3_1G010750/CsaV3_6G040390/CsaV3_4G037690/CsaV3_5G029170/CsaV3_7G031080/CsaV3_5G036470/CsaV3_6G040330/CsaV3_6G040430/CsaV3_3G007840/CsaV3_UNG203700/CsaV3_UN…	33	29	CsaV3_2G033180/CsaV3_5G002770/CsaV3_3G021780/CsaV3_6G013500/CsaV3_2G013320/CsaV3_3G036910/CsaV3_6G002740/CsaV3_1G046070/CsaV3_5G034810/CsaV3_1G005960/CsaV3_5G028690/CsaV3_5G008870/CsaV3_7G022930/CsaV3_3G010470/CsaV3_6G040390/CsaV3_4G037690/CsaV3_5G029170/CsaV3_7G031080/CsaV3_5G036470/CsaV3_6G040330/CsaV3_6G040430/CsaV3_UNG203700/CsaV3_UNG052430/CsaV3_2G001570/CsaV3_2G028640/CsaV3_1G035920/CsaV3_2…	4	CsaV3_6G048080/CsaV3_3G023460/CsaV3_1G010750/CsaV3_3G007840
BP	GO:0009167	purine ribonucleoside monophosphate metabolic process	33/2462	54/5903	0.00302854	0.0291585	CsaV3_2G033180/CsaV3_5G002770/CsaV3_3G021780/CsaV3_6G013500/CsaV3_2G013320/CsaV3_3G036910/CsaV3_6G002740/CsaV3_1G046070/CsaV3_5G034810/CsaV3_1G005960/CsaV3_6G048080/CsaV3_5G028690/CsaV3_5G008870/CsaV3_7G022930/CsaV3_3G010470/CsaV3_3G023460/CsaV3_1G010750/CsaV3_6G040390/CsaV3_4G037690/CsaV3_5G029170/CsaV3_7G031080/CsaV3_5G036470/CsaV3_6G040330/CsaV3_6G040430/CsaV3_3G007840/CsaV3_UNG203700/CsaV3_UN…	CsaV3_2G033180/CsaV3_5G002770/CsaV3_3G021780/CsaV3_6G013500/CsaV3_2G013320/CsaV3_3G036910/CsaV3_6G002740/CsaV3_1G046070/CsaV3_5G034810/CsaV3_1G005960/CsaV3_6G048080/CsaV3_5G028690/CsaV3_5G008870/CsaV3_7G022930/CsaV3_3G010470/CsaV3_3G023460/CsaV3_1G010750/CsaV3_6G040390/CsaV3_4G037690/CsaV3_5G029170/CsaV3_7G031080/CsaV3_5G036470/CsaV3_6G040330/CsaV3_6G040430/CsaV3_3G007840/CsaV3_UNG203700/CsaV3_UN…	33	29	CsaV3_2G033180/CsaV3_5G002770/CsaV3_3G021780/CsaV3_6G013500/CsaV3_2G013320/CsaV3_3G036910/CsaV3_6G002740/CsaV3_1G046070/CsaV3_5G034810/CsaV3_1G005960/CsaV3_5G028690/CsaV3_5G008870/CsaV3_7G022930/CsaV3_3G010470/CsaV3_6G040390/CsaV3_4G037690/CsaV3_5G029170/CsaV3_7G031080/CsaV3_5G036470/CsaV3_6G040330/CsaV3_6G040430/CsaV3_UNG203700/CsaV3_UNG052430/CsaV3_2G001570/CsaV3_2G028640/CsaV3_1G035920/CsaV3_2…	4	CsaV3_6G048080/CsaV3_3G023460/CsaV3_1G010750/CsaV3_3G007840
BP	GO:0019362	pyridine nucleotide metabolic process	25/2462	39/5903	0.00387002	0.0356041	CsaV3_5G034910/CsaV3_1G042920/CsaV3_3G021780/CsaV3_4G006330/CsaV3_6G013500/CsaV3_2G013320/CsaV3_3G036910/CsaV3_1G046070/CsaV3_6G048080/CsaV3_5G028690/CsaV3_7G022930/CsaV3_1G037750/CsaV3_3G023460/CsaV3_6G040390/CsaV3_4G037690/CsaV3_5G029170/CsaV3_6G040330/CsaV3_6G040430/CsaV3_2G028640/CsaV3_5G038830/CsaV3_1G035920/CsaV3_2G030420/CsaV3_2G004240/CsaV3_6G048680/CsaV3_6G040340	CsaV3_5G034910/CsaV3_1G042920/CsaV3_3G021780/CsaV3_4G006330/CsaV3_6G013500/CsaV3_2G013320/CsaV3_3G036910/CsaV3_1G046070/CsaV3_6G048080/CsaV3_5G028690/CsaV3_7G022930/CsaV3_1G037750/CsaV3_3G023460/CsaV3_6G040390/CsaV3_4G037690/CsaV3_5G029170/CsaV3_6G040330/CsaV3_6G040430/CsaV3_2G028640/CsaV3_5G038830/CsaV3_1G035920/CsaV3_2G030420/CsaV3_2G004240/CsaV3_6G048680/CsaV3_6G040340	25	21	CsaV3_3G021780/CsaV3_4G006330/CsaV3_6G013500/CsaV3_2G013320/CsaV3_3G036910/CsaV3_1G046070/CsaV3_5G028690/CsaV3_7G022930/CsaV3_1G037750/CsaV3_6G040390/CsaV3_4G037690/CsaV3_5G029170/CsaV3_6G040330/CsaV3_6G040430/CsaV3_2G028640/CsaV3_5G038830/CsaV3_1G035920/CsaV3_2G030420/CsaV3_2G004240/CsaV3_6G048680/CsaV3_6G040340	4	CsaV3_5G034910/CsaV3_1G042920/CsaV3_6G048080/CsaV3_3G023460
BP	GO:0046496	nicotinamide nucleotide metabolic process	25/2462	39/5903	0.00387002	0.0356041	CsaV3_5G034910/CsaV3_1G042920/CsaV3_3G021780/CsaV3_4G006330/CsaV3_6G013500/CsaV3_2G013320/CsaV3_3G036910/CsaV3_1G046070/CsaV3_6G048080/CsaV3_5G028690/CsaV3_7G022930/CsaV3_1G037750/CsaV3_3G023460/CsaV3_6G040390/CsaV3_4G037690/CsaV3_5G029170/CsaV3_6G040330/CsaV3_6G040430/CsaV3_2G028640/CsaV3_5G038830/CsaV3_1G035920/CsaV3_2G030420/CsaV3_2G004240/CsaV3_6G048680/CsaV3_6G040340	CsaV3_5G034910/CsaV3_1G042920/CsaV3_3G021780/CsaV3_4G006330/CsaV3_6G013500/CsaV3_2G013320/CsaV3_3G036910/CsaV3_1G046070/CsaV3_6G048080/CsaV3_5G028690/CsaV3_7G022930/CsaV3_1G037750/CsaV3_3G023460/CsaV3_6G040390/CsaV3_4G037690/CsaV3_5G029170/CsaV3_6G040330/CsaV3_6G040430/CsaV3_2G028640/CsaV3_5G038830/CsaV3_1G035920/CsaV3_2G030420/CsaV3_2G004240/CsaV3_6G048680/CsaV3_6G040340	25	21	CsaV3_3G021780/CsaV3_4G006330/CsaV3_6G013500/CsaV3_2G013320/CsaV3_3G036910/CsaV3_1G046070/CsaV3_5G028690/CsaV3_7G022930/CsaV3_1G037750/CsaV3_6G040390/CsaV3_4G037690/CsaV3_5G029170/CsaV3_6G040330/CsaV3_6G040430/CsaV3_2G028640/CsaV3_5G038830/CsaV3_1G035920/CsaV3_2G030420/CsaV3_2G004240/CsaV3_6G048680/CsaV3_6G040340	4	CsaV3_5G034910/CsaV3_1G042920/CsaV3_6G048080/CsaV3_3G023460
BP	GO:0006259	DNA metabolic process	77/2462	146/5903	0.00421137	0.0379023	novel.682/CsaV3_4G034020/CsaV3_6G014890/novel.264/CsaV3_4G012090/CsaV3_6G007600/CsaV3_3G019190/CsaV3_3G033440/CsaV3_6G014300/CsaV3_4G031600/CsaV3_6G034200/CsaV3_2G003690/CsaV3_1G002970/CsaV3_3G032050/CsaV3_6G016510/CsaV3_2G028020/CsaV3_1G032850/CsaV3_4G028050/CsaV3_4G033030/CsaV3_4G012030/CsaV3_6G042080/CsaV3_3G047220/CsaV3_UNG200520/CsaV3_3G038830/CsaV3_3G017530/CsaV3_2G016500/CsaV3_2G010800/Csa…	-/CsaV3_4G034020/CsaV3_6G014890/-/CsaV3_4G012090/CsaV3_6G007600/CsaV3_3G019190/CsaV3_3G033440/CsaV3_6G014300/CsaV3_4G031600/CsaV3_6G034200/CsaV3_2G003690/CsaV3_1G002970/CsaV3_3G032050/CsaV3_6G016510/CsaV3_2G028020/CsaV3_1G032850/CsaV3_4G028050/CsaV3_4G033030/CsaV3_4G012030/CsaV3_6G042080/CsaV3_3G047220/CsaV3_UNG200520/CsaV3_3G038830/CsaV3_3G017530/CsaV3_2G016500/CsaV3_2G010800/CsaV3_7G017280/CsaV…	77	59	CsaV3_4G034020/CsaV3_6G014890/CsaV3_4G012090/CsaV3_6G007600/CsaV3_3G019190/CsaV3_3G033440/CsaV3_6G014300/CsaV3_4G031600/CsaV3_6G034200/CsaV3_2G003690/CsaV3_1G002970/CsaV3_3G032050/CsaV3_6G016510/CsaV3_2G028020/CsaV3_1G032850/CsaV3_4G028050/CsaV3_4G033030/CsaV3_4G012030/CsaV3_6G042080/CsaV3_3G047220/CsaV3_3G038830/CsaV3_3G017530/CsaV3_2G016500/CsaV3_2G010800/CsaV3_7G006750/CsaV3_6G035790/CsaV3_5G0…	18	novel.682/novel.264/CsaV3_UNG200520/CsaV3_7G017280/CsaV3_4G010360/CsaV3_6G013350/CsaV3_2G031500/novel.245/CsaV3_UNG214460/CsaV3_5G005690/novel.232/CsaV3_6G046270/CsaV3_3G044900/CsaV3_7G018280/CsaV3_4G009720/CsaV3_3G004590/CsaV3_5G034230/CsaV3_6G046400
BP	GO:0009123	nucleoside monophosphate metabolic process	33/2462	55/5903	0.00457653	0.0403124	CsaV3_2G033180/CsaV3_5G002770/CsaV3_3G021780/CsaV3_6G013500/CsaV3_2G013320/CsaV3_3G036910/CsaV3_6G002740/CsaV3_1G046070/CsaV3_5G034810/CsaV3_1G005960/CsaV3_6G048080/CsaV3_5G028690/CsaV3_5G008870/CsaV3_7G022930/CsaV3_3G010470/CsaV3_3G023460/CsaV3_1G010750/CsaV3_6G040390/CsaV3_4G037690/CsaV3_5G029170/CsaV3_7G031080/CsaV3_5G036470/CsaV3_6G040330/CsaV3_6G040430/CsaV3_3G007840/CsaV3_UNG203700/CsaV3_UN…	CsaV3_2G033180/CsaV3_5G002770/CsaV3_3G021780/CsaV3_6G013500/CsaV3_2G013320/CsaV3_3G036910/CsaV3_6G002740/CsaV3_1G046070/CsaV3_5G034810/CsaV3_1G005960/CsaV3_6G048080/CsaV3_5G028690/CsaV3_5G008870/CsaV3_7G022930/CsaV3_3G010470/CsaV3_3G023460/CsaV3_1G010750/CsaV3_6G040390/CsaV3_4G037690/CsaV3_5G029170/CsaV3_7G031080/CsaV3_5G036470/CsaV3_6G040330/CsaV3_6G040430/CsaV3_3G007840/CsaV3_UNG203700/CsaV3_UN…	33	29	CsaV3_2G033180/CsaV3_5G002770/CsaV3_3G021780/CsaV3_6G013500/CsaV3_2G013320/CsaV3_3G036910/CsaV3_6G002740/CsaV3_1G046070/CsaV3_5G034810/CsaV3_1G005960/CsaV3_5G028690/CsaV3_5G008870/CsaV3_7G022930/CsaV3_3G010470/CsaV3_6G040390/CsaV3_4G037690/CsaV3_5G029170/CsaV3_7G031080/CsaV3_5G036470/CsaV3_6G040330/CsaV3_6G040430/CsaV3_UNG203700/CsaV3_UNG052430/CsaV3_2G001570/CsaV3_2G028640/CsaV3_1G035920/CsaV3_2…	4	CsaV3_6G048080/CsaV3_3G023460/CsaV3_1G010750/CsaV3_3G007840
BP	GO:0006576	cellular biogenic amine metabolic process	205573	14/5903	0.00569663	0.0481307	CsaV3_3G043270/CsaV3_2G013730/CsaV3_2G007090/CsaV3_7G008280/CsaV3_2G007750/CsaV3_1G038260/CsaV3_6G005510/CsaV3_5G010220/CsaV3_1G031480/CsaV3_3G013880/CsaV3_7G008290	CsaV3_3G043270/CsaV3_2G013730/CsaV3_2G007090/CsaV3_7G008280/CsaV3_2G007750/CsaV3_1G038260/CsaV3_6G005510/CsaV3_5G010220/CsaV3_1G031480/CsaV3_3G013880/CsaV3_7G008290	11	7	CsaV3_3G043270/CsaV3_2G013730/CsaV3_6G005510/CsaV3_5G010220/CsaV3_1G031480/CsaV3_3G013880/CsaV3_7G008290	4	CsaV3_2G007090/CsaV3_7G008280/CsaV3_2G007750/CsaV3_1G038260
BP	GO:0044106	cellular amine metabolic process	205573	14/5903	0.00569663	0.0481307	CsaV3_3G043270/CsaV3_2G013730/CsaV3_2G007090/CsaV3_7G008280/CsaV3_2G007750/CsaV3_1G038260/CsaV3_6G005510/CsaV3_5G010220/CsaV3_1G031480/CsaV3_3G013880/CsaV3_7G008290	CsaV3_3G043270/CsaV3_2G013730/CsaV3_2G007090/CsaV3_7G008280/CsaV3_2G007750/CsaV3_1G038260/CsaV3_6G005510/CsaV3_5G010220/CsaV3_1G031480/CsaV3_3G013880/CsaV3_7G008290	11	7	CsaV3_3G043270/CsaV3_2G013730/CsaV3_6G005510/CsaV3_5G010220/CsaV3_1G031480/CsaV3_3G013880/CsaV3_7G008290	4	CsaV3_2G007090/CsaV3_7G008280/CsaV3_2G007750/CsaV3_1G038260
BP	GO:0044281	small molecule metabolic process	166/2462	343/5903	0.00585892	0.0485119	CsaV3_3G010300/CsaV3_5G034910/CsaV3_6G030990/CsaV3_2G030590/CsaV3_1G040000/CsaV3_3G043270/CsaV3_6G006560/CsaV3_4G031360/CsaV3_3G009100/CsaV3_2G033820/CsaV3_7G005980/CsaV3_2G033180/CsaV3_1G042920/CsaV3_5G013970/CsaV3_5G039900/CsaV3_2G003740/CsaV3_6G014760/CsaV3_6G003290/CsaV3_2G003300/CsaV3_5G002770/CsaV3_3G021780/CsaV3_4G013550/CsaV3_4G006330/CsaV3_3G004920/CsaV3_7G018620/CsaV3_5G015730/CsaV3_2G0…	CsaV3_3G010300/CsaV3_5G034910/CsaV3_6G030990/CsaV3_2G030590/CsaV3_1G040000/CsaV3_3G043270/CsaV3_6G006560/CsaV3_4G031360/CsaV3_3G009100/CsaV3_2G033820/CsaV3_7G005980/CsaV3_2G033180/CsaV3_1G042920/CsaV3_5G013970/CsaV3_5G039900/CsaV3_2G003740/CsaV3_6G014760/CsaV3_6G003290/CsaV3_2G003300/CsaV3_5G002770/CsaV3_3G021780/CsaV3_4G013550/CsaV3_4G006330/CsaV3_3G004920/CsaV3_7G018620/CsaV3_5G015730/CsaV3_2G0…	166	119	CsaV3_3G010300/CsaV3_6G030990/CsaV3_3G043270/CsaV3_6G006560/CsaV3_4G031360/CsaV3_3G009100/CsaV3_7G005980/CsaV3_2G033180/CsaV3_5G013970/CsaV3_5G039900/CsaV3_6G014760/CsaV3_2G003300/CsaV3_5G002770/CsaV3_3G021780/CsaV3_4G013550/CsaV3_4G006330/CsaV3_3G004920/CsaV3_5G015730/CsaV3_2G028630/CsaV3_6G004900/CsaV3_2G013730/CsaV3_6G013500/CsaV3_6G051460/CsaV3_3G023420/CsaV3_3G027630/CsaV3_1G012830/CsaV3_2G0…	47	CsaV3_5G034910/CsaV3_2G030590/CsaV3_1G040000/CsaV3_2G033820/CsaV3_1G042920/CsaV3_2G003740/CsaV3_6G003290/CsaV3_7G018620/CsaV3_6G040120/CsaV3_3G048980/CsaV3_2G007090/CsaV3_7G008280/CsaV3_UNG002020/CsaV3_6G047800/CsaV3_6G040130/CsaV3_6G009990/CsaV3_1G038260/CsaV3_5G005130/CsaV3_2G032170/CsaV3_1G045310/CsaV3_6G048080/CsaV3_3G012730/novel.201/CsaV3_6G016090/CsaV3_3G023460/CsaV3_3G039800/CsaV3_2G03658…
BP	GO:0006733	oxidoreduction coenzyme metabolic process	25/2462	40/5903	0.00627486	0.0491917	CsaV3_5G034910/CsaV3_1G042920/CsaV3_3G021780/CsaV3_4G006330/CsaV3_6G013500/CsaV3_2G013320/CsaV3_3G036910/CsaV3_1G046070/CsaV3_6G048080/CsaV3_5G028690/CsaV3_7G022930/CsaV3_1G037750/CsaV3_3G023460/CsaV3_6G040390/CsaV3_4G037690/CsaV3_5G029170/CsaV3_6G040330/CsaV3_6G040430/CsaV3_2G028640/CsaV3_5G038830/CsaV3_1G035920/CsaV3_2G030420/CsaV3_2G004240/CsaV3_6G048680/CsaV3_6G040340	CsaV3_5G034910/CsaV3_1G042920/CsaV3_3G021780/CsaV3_4G006330/CsaV3_6G013500/CsaV3_2G013320/CsaV3_3G036910/CsaV3_1G046070/CsaV3_6G048080/CsaV3_5G028690/CsaV3_7G022930/CsaV3_1G037750/CsaV3_3G023460/CsaV3_6G040390/CsaV3_4G037690/CsaV3_5G029170/CsaV3_6G040330/CsaV3_6G040430/CsaV3_2G028640/CsaV3_5G038830/CsaV3_1G035920/CsaV3_2G030420/CsaV3_2G004240/CsaV3_6G048680/CsaV3_6G040340	25	21	CsaV3_3G021780/CsaV3_4G006330/CsaV3_6G013500/CsaV3_2G013320/CsaV3_3G036910/CsaV3_1G046070/CsaV3_5G028690/CsaV3_7G022930/CsaV3_1G037750/CsaV3_6G040390/CsaV3_4G037690/CsaV3_5G029170/CsaV3_6G040330/CsaV3_6G040430/CsaV3_2G028640/CsaV3_5G038830/CsaV3_1G035920/CsaV3_2G030420/CsaV3_2G004240/CsaV3_6G048680/CsaV3_6G040340	4	CsaV3_5G034910/CsaV3_1G042920/CsaV3_6G048080/CsaV3_3G023460
BP	GO:0072521	purine-containing compound metabolic process	40/2462	70/5903	0.00632008	0.0491917	CsaV3_4G031360/CsaV3_2G033180/CsaV3_5G002770/CsaV3_3G021780/CsaV3_6G013500/CsaV3_2G013320/CsaV3_6G009990/CsaV3_3G036910/CsaV3_6G002740/CsaV3_1G046070/CsaV3_3G006560/CsaV3_5G034810/CsaV3_1G005960/CsaV3_6G048080/CsaV3_5G028690/CsaV3_5G008870/CsaV3_7G022930/CsaV3_3G010470/CsaV3_3G023460/CsaV3_1G010750/CsaV3_6G040390/CsaV3_4G037690/CsaV3_4G008710/CsaV3_5G029170/CsaV3_7G031080/CsaV3_5G036470/CsaV3_6G0…	CsaV3_4G031360/CsaV3_2G033180/CsaV3_5G002770/CsaV3_3G021780/CsaV3_6G013500/CsaV3_2G013320/CsaV3_6G009990/CsaV3_3G036910/CsaV3_6G002740/CsaV3_1G046070/CsaV3_3G006560/CsaV3_5G034810/CsaV3_1G005960/CsaV3_6G048080/CsaV3_5G028690/CsaV3_5G008870/CsaV3_7G022930/CsaV3_3G010470/CsaV3_3G023460/CsaV3_1G010750/CsaV3_6G040390/CsaV3_4G037690/CsaV3_4G008710/CsaV3_5G029170/CsaV3_7G031080/CsaV3_5G036470/CsaV3_6G0…	40	32	CsaV3_4G031360/CsaV3_2G033180/CsaV3_5G002770/CsaV3_3G021780/CsaV3_6G013500/CsaV3_2G013320/CsaV3_3G036910/CsaV3_6G002740/CsaV3_1G046070/CsaV3_3G006560/CsaV3_5G034810/CsaV3_1G005960/CsaV3_5G028690/CsaV3_5G008870/CsaV3_7G022930/CsaV3_3G010470/CsaV3_6G040390/CsaV3_4G037690/CsaV3_5G029170/CsaV3_7G031080/CsaV3_5G036470/CsaV3_6G040330/CsaV3_6G040430/CsaV3_UNG203700/CsaV3_3G007170/CsaV3_UNG052430/CsaV3_2…	8	CsaV3_6G009990/CsaV3_6G048080/CsaV3_3G023460/CsaV3_1G010750/CsaV3_4G008710/CsaV3_4G000530/CsaV3_3G007840/CsaV3_6G035980
BP	GO:0016053	organic acid biosynthetic process	63/2462	118/5903	0.00641631	0.0491917	CsaV3_3G010300/CsaV3_6G006560/CsaV3_3G009100/CsaV3_7G005980/CsaV3_6G014760/CsaV3_2G003300/CsaV3_3G021780/CsaV3_7G018620/CsaV3_6G040120/CsaV3_6G013500/CsaV3_2G007090/CsaV3_6G047800/CsaV3_6G040130/CsaV3_2G013320/CsaV3_3G004760/CsaV3_1G038260/CsaV3_4G025950/CsaV3_3G036910/CsaV3_1G046070/CsaV3_5G003990/CsaV3_5G014440/CsaV3_6G048080/CsaV3_3G012730/CsaV3_5G028690/CsaV3_4G036210/CsaV3_7G022930/CsaV3_5G0…	CsaV3_3G010300/CsaV3_6G006560/CsaV3_3G009100/CsaV3_7G005980/CsaV3_6G014760/CsaV3_2G003300/CsaV3_3G021780/CsaV3_7G018620/CsaV3_6G040120/CsaV3_6G013500/CsaV3_2G007090/CsaV3_6G047800/CsaV3_6G040130/CsaV3_2G013320/CsaV3_3G004760/CsaV3_1G038260/CsaV3_4G025950/CsaV3_3G036910/CsaV3_1G046070/CsaV3_5G003990/CsaV3_5G014440/CsaV3_6G048080/CsaV3_3G012730/CsaV3_5G028690/CsaV3_4G036210/CsaV3_7G022930/CsaV3_5G0…	63	44	CsaV3_3G010300/CsaV3_6G006560/CsaV3_3G009100/CsaV3_7G005980/CsaV3_6G014760/CsaV3_2G003300/CsaV3_3G021780/CsaV3_6G013500/CsaV3_2G013320/CsaV3_3G004760/CsaV3_4G025950/CsaV3_3G036910/CsaV3_1G046070/CsaV3_5G003990/CsaV3_5G014440/CsaV3_5G028690/CsaV3_4G036210/CsaV3_7G022930/CsaV3_5G040040/CsaV3_6G040390/CsaV3_7G021780/CsaV3_4G037690/CsaV3_1G037190/CsaV3_5G029840/CsaV3_7G022530/CsaV3_5G029170/CsaV3_3G0…	19	CsaV3_7G018620/CsaV3_6G040120/CsaV3_2G007090/CsaV3_6G047800/CsaV3_6G040130/CsaV3_1G038260/CsaV3_6G048080/CsaV3_3G012730/novel.201/CsaV3_6G016090/CsaV3_3G023460/CsaV3_5G023920/CsaV3_1G030920/CsaV3_5G032610/CsaV3_6G045310/CsaV3_2G028690/CsaV3_2G010670/CsaV3_6G021500/CsaV3_2G029790
BP	GO:0046394	carboxylic acid biosynthetic process	63/2462	118/5903	0.00641631	0.0491917	CsaV3_3G010300/CsaV3_6G006560/CsaV3_3G009100/CsaV3_7G005980/CsaV3_6G014760/CsaV3_2G003300/CsaV3_3G021780/CsaV3_7G018620/CsaV3_6G040120/CsaV3_6G013500/CsaV3_2G007090/CsaV3_6G047800/CsaV3_6G040130/CsaV3_2G013320/CsaV3_3G004760/CsaV3_1G038260/CsaV3_4G025950/CsaV3_3G036910/CsaV3_1G046070/CsaV3_5G003990/CsaV3_5G014440/CsaV3_6G048080/CsaV3_3G012730/CsaV3_5G028690/CsaV3_4G036210/CsaV3_7G022930/CsaV3_5G0…	CsaV3_3G010300/CsaV3_6G006560/CsaV3_3G009100/CsaV3_7G005980/CsaV3_6G014760/CsaV3_2G003300/CsaV3_3G021780/CsaV3_7G018620/CsaV3_6G040120/CsaV3_6G013500/CsaV3_2G007090/CsaV3_6G047800/CsaV3_6G040130/CsaV3_2G013320/CsaV3_3G004760/CsaV3_1G038260/CsaV3_4G025950/CsaV3_3G036910/CsaV3_1G046070/CsaV3_5G003990/CsaV3_5G014440/CsaV3_6G048080/CsaV3_3G012730/CsaV3_5G028690/CsaV3_4G036210/CsaV3_7G022930/CsaV3_5G0…	63	44	CsaV3_3G010300/CsaV3_6G006560/CsaV3_3G009100/CsaV3_7G005980/CsaV3_6G014760/CsaV3_2G003300/CsaV3_3G021780/CsaV3_6G013500/CsaV3_2G013320/CsaV3_3G004760/CsaV3_4G025950/CsaV3_3G036910/CsaV3_1G046070/CsaV3_5G003990/CsaV3_5G014440/CsaV3_5G028690/CsaV3_4G036210/CsaV3_7G022930/CsaV3_5G040040/CsaV3_6G040390/CsaV3_7G021780/CsaV3_4G037690/CsaV3_1G037190/CsaV3_5G029840/CsaV3_7G022530/CsaV3_5G029170/CsaV3_3G0…	19	CsaV3_7G018620/CsaV3_6G040120/CsaV3_2G007090/CsaV3_6G047800/CsaV3_6G040130/CsaV3_1G038260/CsaV3_6G048080/CsaV3_3G012730/novel.201/CsaV3_6G016090/CsaV3_3G023460/CsaV3_5G023920/CsaV3_1G030920/CsaV3_5G032610/CsaV3_6G045310/CsaV3_2G028690/CsaV3_2G010670/CsaV3_6G021500/CsaV3_2G029790
CC	GO:0005840	ribosome	141/917	194/2131	1.78964e-18	1.91492e-16	CsaV3_3G015690/CsaV3_4G004050/CsaV3_1G010160/CsaV3_4G032830/CsaV3_5G039260/CsaV3_6G050830/CsaV3_1G014590/CsaV3_3G040630/CsaV3_4G009970/CsaV3_3G020570/CsaV3_3G032940/CsaV3_3G004770/CsaV3_5G005100/CsaV3_6G016380/CsaV3_6G046990/CsaV3_7G003660/CsaV3_4G031960/CsaV3_4G008900/CsaV3_6G021530/CsaV3_7G029290/CsaV3_3G035460/CsaV3_3G031360/CsaV3_5G010880/CsaV3_7G001960/CsaV3_3G002360/CsaV3_4G024340/CsaV3_2G0…	CsaV3_3G015690/CsaV3_4G004050/CsaV3_1G010160/CsaV3_4G032830/CsaV3_5G039260/CsaV3_6G050830/CsaV3_1G014590/CsaV3_3G040630/CsaV3_4G009970/CsaV3_3G020570/CsaV3_3G032940/CsaV3_3G004770/CsaV3_5G005100/CsaV3_6G016380/CsaV3_6G046990/CsaV3_7G003660/CsaV3_4G031960/CsaV3_4G008900/CsaV3_6G021530/CsaV3_7G029290/CsaV3_3G035460/CsaV3_3G031360/CsaV3_5G010880/CsaV3_7G001960/CsaV3_3G002360/CsaV3_4G024340/CsaV3_2G0…	141	139	CsaV3_3G015690/CsaV3_4G004050/CsaV3_1G010160/CsaV3_4G032830/CsaV3_5G039260/CsaV3_6G050830/CsaV3_1G014590/CsaV3_3G040630/CsaV3_4G009970/CsaV3_3G020570/CsaV3_3G032940/CsaV3_3G004770/CsaV3_5G005100/CsaV3_6G016380/CsaV3_6G046990/CsaV3_7G003660/CsaV3_4G031960/CsaV3_4G008900/CsaV3_6G021530/CsaV3_7G029290/CsaV3_3G035460/CsaV3_3G031360/CsaV3_5G010880/CsaV3_7G001960/CsaV3_3G002360/CsaV3_4G024340/CsaV3_2G0…	2	novel.992/CsaV3_4G002110
CC	GO:1990904	ribonucleoprotein complex	150/917	220/2131	1.76004e-15	9.4162e-14	CsaV3_3G015690/CsaV3_4G004050/CsaV3_1G010160/CsaV3_4G032830/CsaV3_5G039260/CsaV3_6G050830/CsaV3_1G014590/CsaV3_3G040630/CsaV3_4G009970/CsaV3_3G020570/CsaV3_3G032940/CsaV3_3G004770/CsaV3_5G005100/CsaV3_6G016380/CsaV3_6G046990/CsaV3_7G003660/CsaV3_4G031960/CsaV3_5G030580/CsaV3_4G008900/CsaV3_6G021530/CsaV3_7G029290/CsaV3_3G035460/CsaV3_3G031360/CsaV3_5G010880/CsaV3_7G001960/CsaV3_3G002360/CsaV3_4G0…	CsaV3_3G015690/CsaV3_4G004050/CsaV3_1G010160/CsaV3_4G032830/CsaV3_5G039260/CsaV3_6G050830/CsaV3_1G014590/CsaV3_3G040630/CsaV3_4G009970/CsaV3_3G020570/CsaV3_3G032940/CsaV3_3G004770/CsaV3_5G005100/CsaV3_6G016380/CsaV3_6G046990/CsaV3_7G003660/CsaV3_4G031960/CsaV3_5G030580/CsaV3_4G008900/CsaV3_6G021530/CsaV3_7G029290/CsaV3_3G035460/CsaV3_3G031360/CsaV3_5G010880/CsaV3_7G001960/CsaV3_3G002360/CsaV3_4G0…	150	147	CsaV3_3G015690/CsaV3_4G004050/CsaV3_1G010160/CsaV3_4G032830/CsaV3_5G039260/CsaV3_6G050830/CsaV3_1G014590/CsaV3_3G040630/CsaV3_4G009970/CsaV3_3G020570/CsaV3_3G032940/CsaV3_3G004770/CsaV3_5G005100/CsaV3_6G016380/CsaV3_6G046990/CsaV3_7G003660/CsaV3_4G031960/CsaV3_5G030580/CsaV3_4G008900/CsaV3_6G021530/CsaV3_7G029290/CsaV3_3G035460/CsaV3_3G031360/CsaV3_5G010880/CsaV3_7G001960/CsaV3_3G002360/CsaV3_4G0…	3	CsaV3_2G017010/novel.992/CsaV3_4G002110
CC	GO:0043228	non-membrane-bounded organelle	177/917	277/2131	5.55986e-14	1.48726e-12	CsaV3_7G031590/CsaV3_3G015690/CsaV3_4G004050/CsaV3_1G010160/CsaV3_4G032830/CsaV3_5G039260/CsaV3_5G027160/CsaV3_6G050830/CsaV3_5G027630/CsaV3_1G014590/CsaV3_3G040630/CsaV3_4G009970/CsaV3_3G020570/CsaV3_3G032940/CsaV3_3G004770/CsaV3_5G005100/CsaV3_6G016380/CsaV3_6G046990/CsaV3_7G003660/CsaV3_4G031960/CsaV3_4G008900/CsaV3_2G028020/CsaV3_6G021530/CsaV3_7G029290/CsaV3_3G035460/CsaV3_3G031360/CsaV3_5G0…	CsaV3_7G031590/CsaV3_3G015690/CsaV3_4G004050/CsaV3_1G010160/CsaV3_4G032830/CsaV3_5G039260/CsaV3_5G027160/CsaV3_6G050830/CsaV3_5G027630/CsaV3_1G014590/CsaV3_3G040630/CsaV3_4G009970/CsaV3_3G020570/CsaV3_3G032940/CsaV3_3G004770/CsaV3_5G005100/CsaV3_6G016380/CsaV3_6G046990/CsaV3_7G003660/CsaV3_4G031960/CsaV3_4G008900/CsaV3_2G028020/CsaV3_6G021530/CsaV3_7G029290/CsaV3_3G035460/CsaV3_3G031360/CsaV3_5G0…	177	161	CsaV3_3G015690/CsaV3_4G004050/CsaV3_1G010160/CsaV3_4G032830/CsaV3_5G039260/CsaV3_6G050830/CsaV3_5G027630/CsaV3_1G014590/CsaV3_3G040630/CsaV3_4G009970/CsaV3_3G020570/CsaV3_3G032940/CsaV3_3G004770/CsaV3_5G005100/CsaV3_6G016380/CsaV3_6G046990/CsaV3_7G003660/CsaV3_4G031960/CsaV3_4G008900/CsaV3_2G028020/CsaV3_6G021530/CsaV3_7G029290/CsaV3_3G035460/CsaV3_3G031360/CsaV3_5G010880/CsaV3_7G001960/CsaV3_3G0…	16	CsaV3_7G031590/CsaV3_5G027160/CsaV3_UNG200520/CsaV3_4G000180/CsaV3_2G002750/novel.992/CsaV3_6G007240/CsaV3_7G017280/CsaV3_UNG214460/CsaV3_2G003270/CsaV3_6G046960/CsaV3_7G030020/CsaV3_3G011790/CsaV3_5G000730/CsaV3_7G018280/CsaV3_4G002110
CC	GO:0043232	intracellular non-membrane-bounded organelle	177/917	277/2131	5.55986e-14	1.48726e-12	CsaV3_7G031590/CsaV3_3G015690/CsaV3_4G004050/CsaV3_1G010160/CsaV3_4G032830/CsaV3_5G039260/CsaV3_5G027160/CsaV3_6G050830/CsaV3_5G027630/CsaV3_1G014590/CsaV3_3G040630/CsaV3_4G009970/CsaV3_3G020570/CsaV3_3G032940/CsaV3_3G004770/CsaV3_5G005100/CsaV3_6G016380/CsaV3_6G046990/CsaV3_7G003660/CsaV3_4G031960/CsaV3_4G008900/CsaV3_2G028020/CsaV3_6G021530/CsaV3_7G029290/CsaV3_3G035460/CsaV3_3G031360/CsaV3_5G0…	CsaV3_7G031590/CsaV3_3G015690/CsaV3_4G004050/CsaV3_1G010160/CsaV3_4G032830/CsaV3_5G039260/CsaV3_5G027160/CsaV3_6G050830/CsaV3_5G027630/CsaV3_1G014590/CsaV3_3G040630/CsaV3_4G009970/CsaV3_3G020570/CsaV3_3G032940/CsaV3_3G004770/CsaV3_5G005100/CsaV3_6G016380/CsaV3_6G046990/CsaV3_7G003660/CsaV3_4G031960/CsaV3_4G008900/CsaV3_2G028020/CsaV3_6G021530/CsaV3_7G029290/CsaV3_3G035460/CsaV3_3G031360/CsaV3_5G0…	177	161	CsaV3_3G015690/CsaV3_4G004050/CsaV3_1G010160/CsaV3_4G032830/CsaV3_5G039260/CsaV3_6G050830/CsaV3_5G027630/CsaV3_1G014590/CsaV3_3G040630/CsaV3_4G009970/CsaV3_3G020570/CsaV3_3G032940/CsaV3_3G004770/CsaV3_5G005100/CsaV3_6G016380/CsaV3_6G046990/CsaV3_7G003660/CsaV3_4G031960/CsaV3_4G008900/CsaV3_2G028020/CsaV3_6G021530/CsaV3_7G029290/CsaV3_3G035460/CsaV3_3G031360/CsaV3_5G010880/CsaV3_7G001960/CsaV3_3G0…	16	CsaV3_7G031590/CsaV3_5G027160/CsaV3_UNG200520/CsaV3_4G000180/CsaV3_2G002750/novel.992/CsaV3_6G007240/CsaV3_7G017280/CsaV3_UNG214460/CsaV3_2G003270/CsaV3_6G046960/CsaV3_7G030020/CsaV3_3G011790/CsaV3_5G000730/CsaV3_7G018280/CsaV3_4G002110
CC	GO:0044444	cytoplasmic part	224/917	412/2131	1.7219e-07	3.68487e-06	CsaV3_5G023060/CsaV3_7G029820/CsaV3_3G015690/CsaV3_4G004050/CsaV3_1G010160/CsaV3_6G022100/CsaV3_4G032830/CsaV3_6G004430/CsaV3_5G039260/CsaV3_6G050830/CsaV3_1G036690/CsaV3_1G014590/CsaV3_3G040630/CsaV3_3G019240/CsaV3_1G036490/CsaV3_4G009970/CsaV3_4G036750/CsaV3_3G020570/CsaV3_3G032940/CsaV3_3G014360/CsaV3_3G004770/CsaV3_5G005100/CsaV3_6G016380/CsaV3_5G029580/CsaV3_6G046990/CsaV3_7G003660/CsaV3_4G0…	CsaV3_5G023060/CsaV3_7G029820/CsaV3_3G015690/CsaV3_4G004050/CsaV3_1G010160/CsaV3_6G022100/CsaV3_4G032830/CsaV3_6G004430/CsaV3_5G039260/CsaV3_6G050830/CsaV3_1G036690/CsaV3_1G014590/CsaV3_3G040630/CsaV3_3G019240/CsaV3_1G036490/CsaV3_4G009970/CsaV3_4G036750/CsaV3_3G020570/CsaV3_3G032940/CsaV3_3G014360/CsaV3_3G004770/CsaV3_5G005100/CsaV3_6G016380/CsaV3_5G029580/CsaV3_6G046990/CsaV3_7G003660/CsaV3_4G0…	224	202	CsaV3_7G029820/CsaV3_3G015690/CsaV3_4G004050/CsaV3_1G010160/CsaV3_4G032830/CsaV3_6G004430/CsaV3_5G039260/CsaV3_6G050830/CsaV3_1G036690/CsaV3_1G014590/CsaV3_3G040630/CsaV3_3G019240/CsaV3_4G009970/CsaV3_4G036750/CsaV3_3G020570/CsaV3_3G032940/CsaV3_3G004770/CsaV3_5G005100/CsaV3_6G016380/CsaV3_5G029580/CsaV3_6G046990/CsaV3_7G003660/CsaV3_4G031960/CsaV3_5G030580/CsaV3_4G001330/CsaV3_4G008900/CsaV3_6G0…	22	CsaV3_5G023060/CsaV3_6G022100/CsaV3_1G036490/CsaV3_3G014360/CsaV3_3G047480/CsaV3_7G002510/CsaV3_1G005990/CsaV3_7G029390/CsaV3_6G003740/novel.992/CsaV3_1G004130/CsaV3_3G030800/CsaV3_3G014350/CsaV3_6G045430/CsaV3_2G007560/CsaV3_1G033630/CsaV3_4G009180/CsaV3_3G002720/CsaV3_1G009630/CsaV3_1G043510/CsaV3_6G050000/CsaV3_4G002110
CC	GO:0005737	cytoplasm	252/917	488/2131	8.2787e-06	0.000147637	CsaV3_1G040000/CsaV3_5G023060/CsaV3_7G029820/CsaV3_3G015690/CsaV3_4G004050/CsaV3_1G010160/CsaV3_6G022100/CsaV3_4G032830/CsaV3_6G004430/CsaV3_5G039260/CsaV3_6G050830/CsaV3_1G036690/CsaV3_1G014590/CsaV3_4G005570/CsaV3_3G040630/CsaV3_3G019240/CsaV3_1G036490/CsaV3_4G009970/CsaV3_4G036750/CsaV3_3G020570/CsaV3_3G032940/CsaV3_3G014360/CsaV3_3G004770/CsaV3_5G005100/CsaV3_6G016380/CsaV3_5G029580/CsaV3_4G0…	CsaV3_1G040000/CsaV3_5G023060/CsaV3_7G029820/CsaV3_3G015690/CsaV3_4G004050/CsaV3_1G010160/CsaV3_6G022100/CsaV3_4G032830/CsaV3_6G004430/CsaV3_5G039260/CsaV3_6G050830/CsaV3_1G036690/CsaV3_1G014590/CsaV3_4G005570/CsaV3_3G040630/CsaV3_3G019240/CsaV3_1G036490/CsaV3_4G009970/CsaV3_4G036750/CsaV3_3G020570/CsaV3_3G032940/CsaV3_3G014360/CsaV3_3G004770/CsaV3_5G005100/CsaV3_6G016380/CsaV3_5G029580/CsaV3_4G0…	252	223	CsaV3_7G029820/CsaV3_3G015690/CsaV3_4G004050/CsaV3_1G010160/CsaV3_4G032830/CsaV3_6G004430/CsaV3_5G039260/CsaV3_6G050830/CsaV3_1G036690/CsaV3_1G014590/CsaV3_4G005570/CsaV3_3G040630/CsaV3_3G019240/CsaV3_4G009970/CsaV3_4G036750/CsaV3_3G020570/CsaV3_3G032940/CsaV3_3G004770/CsaV3_5G005100/CsaV3_6G016380/CsaV3_5G029580/CsaV3_4G013550/CsaV3_6G046990/CsaV3_7G003660/CsaV3_4G031960/CsaV3_5G030580/CsaV3_4G0…	29	CsaV3_1G040000/CsaV3_5G023060/CsaV3_6G022100/CsaV3_1G036490/CsaV3_3G014360/CsaV3_3G047480/CsaV3_7G018620/CsaV3_7G002510/CsaV3_1G005990/CsaV3_6G047800/CsaV3_4G024730/CsaV3_7G029390/CsaV3_6G003740/novel.992/CsaV3_1G004130/CsaV3_3G030800/CsaV3_3G014350/CsaV3_6G045430/CsaV3_2G007560/CsaV3_1G033630/CsaV3_4G009180/CsaV3_3G018020/CsaV3_6G030920/CsaV3_3G002720/CsaV3_1G009630/CsaV3_1G043510/CsaV3_6G050000…
CC	GO:0000502	proteasome complex	17/917	20/2131	0.000133556	0.00178631	CsaV3_4G025500/CsaV3_7G034340/CsaV3_7G001120/CsaV3_6G032330/CsaV3_3G013100/CsaV3_6G047290/CsaV3_4G032560/CsaV3_4G031710/CsaV3_6G034220/CsaV3_1G046270/CsaV3_3G000690/CsaV3_2G028900/CsaV3_6G021700/CsaV3_3G009670/CsaV3_6G006240/novel.211/CsaV3_2G031230	CsaV3_4G025500/CsaV3_7G034340/CsaV3_7G001120/CsaV3_6G032330/CsaV3_3G013100/CsaV3_6G047290/CsaV3_4G032560/CsaV3_4G031710/CsaV3_6G034220/CsaV3_1G046270/CsaV3_3G000690/CsaV3_2G028900/CsaV3_6G021700/CsaV3_3G009670/CsaV3_6G006240/-/CsaV3_2G031230	17	17	CsaV3_4G025500/CsaV3_7G034340/CsaV3_7G001120/CsaV3_6G032330/CsaV3_3G013100/CsaV3_6G047290/CsaV3_4G032560/CsaV3_4G031710/CsaV3_6G034220/CsaV3_1G046270/CsaV3_3G000690/CsaV3_2G028900/CsaV3_6G021700/CsaV3_3G009670/CsaV3_6G006240/novel.211/CsaV3_2G031230	0
CC	GO:1905369	endopeptidase complex	17/917	20/2131	0.000133556	0.00178631	CsaV3_4G025500/CsaV3_7G034340/CsaV3_7G001120/CsaV3_6G032330/CsaV3_3G013100/CsaV3_6G047290/CsaV3_4G032560/CsaV3_4G031710/CsaV3_6G034220/CsaV3_1G046270/CsaV3_3G000690/CsaV3_2G028900/CsaV3_6G021700/CsaV3_3G009670/CsaV3_6G006240/novel.211/CsaV3_2G031230	CsaV3_4G025500/CsaV3_7G034340/CsaV3_7G001120/CsaV3_6G032330/CsaV3_3G013100/CsaV3_6G047290/CsaV3_4G032560/CsaV3_4G031710/CsaV3_6G034220/CsaV3_1G046270/CsaV3_3G000690/CsaV3_2G028900/CsaV3_6G021700/CsaV3_3G009670/CsaV3_6G006240/-/CsaV3_2G031230	17	17	CsaV3_4G025500/CsaV3_7G034340/CsaV3_7G001120/CsaV3_6G032330/CsaV3_3G013100/CsaV3_6G047290/CsaV3_4G032560/CsaV3_4G031710/CsaV3_6G034220/CsaV3_1G046270/CsaV3_3G000690/CsaV3_2G028900/CsaV3_6G021700/CsaV3_3G009670/CsaV3_6G006240/novel.211/CsaV3_2G031230	0
MF	GO:0003735	structural constituent of ribosome	143/3696	197/8795	1.54086e-18	4.42228e-16	CsaV3_3G015690/CsaV3_4G004050/CsaV3_1G010160/CsaV3_4G032830/CsaV3_5G039260/CsaV3_6G050830/CsaV3_1G014590/CsaV3_3G040630/CsaV3_4G009970/CsaV3_3G020570/CsaV3_3G032940/CsaV3_3G004770/CsaV3_5G005100/CsaV3_6G016380/CsaV3_6G046990/CsaV3_7G003660/CsaV3_4G031960/CsaV3_4G008900/CsaV3_6G021530/CsaV3_7G029290/CsaV3_3G035460/CsaV3_3G031360/CsaV3_5G010880/CsaV3_7G001960/CsaV3_3G002360/CsaV3_3G011880/CsaV3_4G0…	CsaV3_3G015690/CsaV3_4G004050/CsaV3_1G010160/CsaV3_4G032830/CsaV3_5G039260/CsaV3_6G050830/CsaV3_1G014590/CsaV3_3G040630/CsaV3_4G009970/CsaV3_3G020570/CsaV3_3G032940/CsaV3_3G004770/CsaV3_5G005100/CsaV3_6G016380/CsaV3_6G046990/CsaV3_7G003660/CsaV3_4G031960/CsaV3_4G008900/CsaV3_6G021530/CsaV3_7G029290/CsaV3_3G035460/CsaV3_3G031360/CsaV3_5G010880/CsaV3_7G001960/CsaV3_3G002360/CsaV3_3G011880/CsaV3_4G0…	143	141	CsaV3_3G015690/CsaV3_4G004050/CsaV3_1G010160/CsaV3_4G032830/CsaV3_5G039260/CsaV3_6G050830/CsaV3_1G014590/CsaV3_3G040630/CsaV3_4G009970/CsaV3_3G020570/CsaV3_3G032940/CsaV3_3G004770/CsaV3_5G005100/CsaV3_6G016380/CsaV3_6G046990/CsaV3_7G003660/CsaV3_4G031960/CsaV3_4G008900/CsaV3_6G021530/CsaV3_7G029290/CsaV3_3G035460/CsaV3_3G031360/CsaV3_5G010880/CsaV3_7G001960/CsaV3_3G002360/CsaV3_3G011880/CsaV3_4G0…	2	novel.992/CsaV3_4G002110
MF	GO:0005198	structural molecule activity	147/3696	211/8795	2.082e-16	2.98768e-14	CsaV3_3G015690/CsaV3_4G004050/CsaV3_1G010160/CsaV3_4G032830/CsaV3_5G039260/CsaV3_6G050830/CsaV3_1G014590/CsaV3_3G040630/CsaV3_4G009970/CsaV3_3G020570/CsaV3_3G032940/CsaV3_3G004770/CsaV3_5G005100/CsaV3_6G016380/CsaV3_6G046990/CsaV3_7G003660/CsaV3_4G031960/CsaV3_4G008900/CsaV3_6G021530/CsaV3_7G029290/CsaV3_3G035460/CsaV3_3G031360/CsaV3_5G010880/CsaV3_7G001960/CsaV3_3G002360/CsaV3_3G011880/CsaV3_4G0…	CsaV3_3G015690/CsaV3_4G004050/CsaV3_1G010160/CsaV3_4G032830/CsaV3_5G039260/CsaV3_6G050830/CsaV3_1G014590/CsaV3_3G040630/CsaV3_4G009970/CsaV3_3G020570/CsaV3_3G032940/CsaV3_3G004770/CsaV3_5G005100/CsaV3_6G016380/CsaV3_6G046990/CsaV3_7G003660/CsaV3_4G031960/CsaV3_4G008900/CsaV3_6G021530/CsaV3_7G029290/CsaV3_3G035460/CsaV3_3G031360/CsaV3_5G010880/CsaV3_7G001960/CsaV3_3G002360/CsaV3_3G011880/CsaV3_4G0…	147	144	CsaV3_3G015690/CsaV3_4G004050/CsaV3_1G010160/CsaV3_4G032830/CsaV3_5G039260/CsaV3_6G050830/CsaV3_1G014590/CsaV3_3G040630/CsaV3_4G009970/CsaV3_3G020570/CsaV3_3G032940/CsaV3_3G004770/CsaV3_5G005100/CsaV3_6G016380/CsaV3_6G046990/CsaV3_7G003660/CsaV3_4G031960/CsaV3_4G008900/CsaV3_6G021530/CsaV3_7G029290/CsaV3_3G035460/CsaV3_3G031360/CsaV3_5G010880/CsaV3_7G001960/CsaV3_3G002360/CsaV3_3G011880/CsaV3_4G0…	3	novel.992/CsaV3_6G050000/CsaV3_4G002110
MF	GO:0004298	threonine-type endopeptidase activity	15/3696	18/8795	0.000406007	0.029131	CsaV3_4G025500/CsaV3_7G034340/CsaV3_6G032330/CsaV3_3G013100/CsaV3_6G047290/CsaV3_4G032560/CsaV3_4G031710/CsaV3_6G034220/CsaV3_1G046270/CsaV3_3G000690/CsaV3_2G028900/CsaV3_6G021700/CsaV3_3G009670/novel.211/CsaV3_2G031230	CsaV3_4G025500/CsaV3_7G034340/CsaV3_6G032330/CsaV3_3G013100/CsaV3_6G047290/CsaV3_4G032560/CsaV3_4G031710/CsaV3_6G034220/CsaV3_1G046270/CsaV3_3G000690/CsaV3_2G028900/CsaV3_6G021700/CsaV3_3G009670/-/CsaV3_2G031230	15	15	CsaV3_4G025500/CsaV3_7G034340/CsaV3_6G032330/CsaV3_3G013100/CsaV3_6G047290/CsaV3_4G032560/CsaV3_4G031710/CsaV3_6G034220/CsaV3_1G046270/CsaV3_3G000690/CsaV3_2G028900/CsaV3_6G021700/CsaV3_3G009670/novel.211/CsaV3_2G031230	0
MF	GO:0070003	threonine-type peptidase activity	15/3696	18/8795	0.000406007	0.029131	CsaV3_4G025500/CsaV3_7G034340/CsaV3_6G032330/CsaV3_3G013100/CsaV3_6G047290/CsaV3_4G032560/CsaV3_4G031710/CsaV3_6G034220/CsaV3_1G046270/CsaV3_3G000690/CsaV3_2G028900/CsaV3_6G021700/CsaV3_3G009670/novel.211/CsaV3_2G031230	CsaV3_4G025500/CsaV3_7G034340/CsaV3_6G032330/CsaV3_3G013100/CsaV3_6G047290/CsaV3_4G032560/CsaV3_4G031710/CsaV3_6G034220/CsaV3_1G046270/CsaV3_3G000690/CsaV3_2G028900/CsaV3_6G021700/CsaV3_3G009670/-/CsaV3_2G031230	15	15	CsaV3_4G025500/CsaV3_7G034340/CsaV3_6G032330/CsaV3_3G013100/CsaV3_6G047290/CsaV3_4G032560/CsaV3_4G031710/CsaV3_6G034220/CsaV3_1G046270/CsaV3_3G000690/CsaV3_2G028900/CsaV3_6G021700/CsaV3_3G009670/novel.211/CsaV3_2G031230	0

## Sheet: XS_20vsXN_20 DAP GO
Category	GOID	Description	GeneRatio	BgRatio	pvalue	padj	geneID	geneName	Count	Up	Up_Gene_id	Down	Down_Gene_id
BP	GO:0030243	cellulose metabolic process	11/817	37/5815	0.0103547	0.508249	CsaV3_1G033150/CsaV3_2G009180/CsaV3_6G007440/CsaV3_6G002560/CsaV3_7G003440/CsaV3_2G036170/CsaV3_4G001040/CsaV3_6G007450/CsaV3_3G012430/CsaV3_4G001060/novel.989	CsaV3_1G033150/CsaV3_2G009180/CsaV3_6G007440/CsaV3_6G002560/CsaV3_7G003440/CsaV3_2G036170/CsaV3_4G001040/CsaV3_6G007450/CsaV3_3G012430/CsaV3_4G001060/-	11	5	CsaV3_1G033150/CsaV3_2G009180/CsaV3_6G007440/CsaV3_2G036170/CsaV3_6G007450	6	CsaV3_6G002560/CsaV3_7G003440/CsaV3_4G001040/CsaV3_3G012430/CsaV3_4G001060/novel.989
BP	GO:0030244	cellulose biosynthetic process	11/817	37/5815	0.0103547	0.508249	CsaV3_1G033150/CsaV3_2G009180/CsaV3_6G007440/CsaV3_6G002560/CsaV3_7G003440/CsaV3_2G036170/CsaV3_4G001040/CsaV3_6G007450/CsaV3_3G012430/CsaV3_4G001060/novel.989	CsaV3_1G033150/CsaV3_2G009180/CsaV3_6G007440/CsaV3_6G002560/CsaV3_7G003440/CsaV3_2G036170/CsaV3_4G001040/CsaV3_6G007450/CsaV3_3G012430/CsaV3_4G001060/-	11	5	CsaV3_1G033150/CsaV3_2G009180/CsaV3_6G007440/CsaV3_2G036170/CsaV3_6G007450	6	CsaV3_6G002560/CsaV3_7G003440/CsaV3_4G001040/CsaV3_3G012430/CsaV3_4G001060/novel.989
BP	GO:0044272	sulfur compound biosynthetic process	5/817	1430230	0.0119946	0.508249	CsaV3_7G029140/CsaV3_7G018620/CsaV3_6G039940/CsaV3_7G030490/CsaV3_3G040500	CsaV3_7G029140/CsaV3_7G018620/CsaV3_6G039940/CsaV3_7G030490/CsaV3_3G040500	5	3	CsaV3_7G029140/CsaV3_7G018620/CsaV3_6G039940	2	CsaV3_7G030490/CsaV3_3G040500
BP	GO:0042221	response to chemical	21/817	91/5815	0.0131259	0.508249	CsaV3_5G003220/CsaV3_6G007970/CsaV3_3G030900/CsaV3_6G040760/CsaV3_5G034790/CsaV3_6G007510/CsaV3_5G031190/CsaV3_5G000180/CsaV3_5G040020/CsaV3_7G003650/CsaV3_2G008060/CsaV3_1G008910/CsaV3_5G020230/CsaV3_4G031250/CsaV3_1G004170/CsaV3_6G052060/CsaV3_7G022810/CsaV3_7G001750/CsaV3_3G045730/CsaV3_4G005460/CsaV3_5G001910	CsaV3_5G003220/CsaV3_6G007970/CsaV3_3G030900/CsaV3_6G040760/CsaV3_5G034790/CsaV3_6G007510/CsaV3_5G031190/CsaV3_5G000180/CsaV3_5G040020/CsaV3_7G003650/CsaV3_2G008060/CsaV3_1G008910/CsaV3_5G020230/CsaV3_4G031250/CsaV3_1G004170/CsaV3_6G052060/CsaV3_7G022810/CsaV3_7G001750/CsaV3_3G045730/CsaV3_4G005460/CsaV3_5G001910	21	14	CsaV3_5G003220/CsaV3_6G007970/CsaV3_3G030900/CsaV3_6G040760/CsaV3_5G034790/CsaV3_6G007510/CsaV3_5G040020/CsaV3_7G003650/CsaV3_2G008060/CsaV3_5G020230/CsaV3_6G052060/CsaV3_3G045730/CsaV3_4G005460/CsaV3_5G001910	7	CsaV3_5G031190/CsaV3_5G000180/CsaV3_1G008910/CsaV3_4G031250/CsaV3_1G004170/CsaV3_7G022810/CsaV3_7G001750
BP	GO:0034637	cellular carbohydrate biosynthetic process	16/817	64/5815	0.013517	0.508249	CsaV3_1G033150/CsaV3_2G009180/CsaV3_6G007440/CsaV3_6G045560/CsaV3_6G002560/CsaV3_7G003440/CsaV3_2G036170/CsaV3_4G001040/CsaV3_6G007450/CsaV3_3G016150/CsaV3_3G012430/CsaV3_4G001060/CsaV3_4G004810/CsaV3_1G022900/CsaV3_6G012910/novel.989	CsaV3_1G033150/CsaV3_2G009180/CsaV3_6G007440/CsaV3_6G045560/CsaV3_6G002560/CsaV3_7G003440/CsaV3_2G036170/CsaV3_4G001040/CsaV3_6G007450/CsaV3_3G016150/CsaV3_3G012430/CsaV3_4G001060/CsaV3_4G004810/CsaV3_1G022900/CsaV3_6G012910/-	16	8	CsaV3_1G033150/CsaV3_2G009180/CsaV3_6G007440/CsaV3_6G045560/CsaV3_2G036170/CsaV3_6G007450/CsaV3_4G004810/CsaV3_1G022900	8	CsaV3_6G002560/CsaV3_7G003440/CsaV3_4G001040/CsaV3_3G016150/CsaV3_3G012430/CsaV3_4G001060/CsaV3_6G012910/novel.989
BP	GO:0016051	carbohydrate biosynthetic process	17/817	71/5815	0.017032	0.508249	CsaV3_1G033150/CsaV3_2G009180/CsaV3_6G007440/CsaV3_6G045560/CsaV3_6G002560/CsaV3_7G003440/CsaV3_2G036170/CsaV3_4G001040/CsaV3_6G007450/CsaV3_3G016150/CsaV3_3G012430/CsaV3_4G001060/CsaV3_7G002510/CsaV3_4G004810/CsaV3_1G022900/CsaV3_6G012910/novel.989	CsaV3_1G033150/CsaV3_2G009180/CsaV3_6G007440/CsaV3_6G045560/CsaV3_6G002560/CsaV3_7G003440/CsaV3_2G036170/CsaV3_4G001040/CsaV3_6G007450/CsaV3_3G016150/CsaV3_3G012430/CsaV3_4G001060/CsaV3_7G002510/CsaV3_4G004810/CsaV3_1G022900/CsaV3_6G012910/-	17	8	CsaV3_1G033150/CsaV3_2G009180/CsaV3_6G007440/CsaV3_6G045560/CsaV3_2G036170/CsaV3_6G007450/CsaV3_4G004810/CsaV3_1G022900	9	CsaV3_6G002560/CsaV3_7G003440/CsaV3_4G001040/CsaV3_3G016150/CsaV3_3G012430/CsaV3_4G001060/CsaV3_7G002510/CsaV3_6G012910/novel.989
BP	GO:0006073	cellular glucan metabolic process	16/817	66/5815	0.0180771	0.508249	CsaV3_1G033150/CsaV3_2G009180/CsaV3_6G007440/CsaV3_6G002560/CsaV3_7G003440/CsaV3_2G036170/CsaV3_4G001040/CsaV3_6G007450/CsaV3_1G031470/CsaV3_3G012430/CsaV3_5G027790/CsaV3_4G001060/CsaV3_1G017280/CsaV3_1G031430/CsaV3_6G012910/novel.989	CsaV3_1G033150/CsaV3_2G009180/CsaV3_6G007440/CsaV3_6G002560/CsaV3_7G003440/CsaV3_2G036170/CsaV3_4G001040/CsaV3_6G007450/CsaV3_1G031470/CsaV3_3G012430/CsaV3_5G027790/CsaV3_4G001060/CsaV3_1G017280/CsaV3_1G031430/CsaV3_6G012910/-	16	8	CsaV3_1G033150/CsaV3_2G009180/CsaV3_6G007440/CsaV3_2G036170/CsaV3_6G007450/CsaV3_1G031470/CsaV3_5G027790/CsaV3_1G017280	8	CsaV3_6G002560/CsaV3_7G003440/CsaV3_4G001040/CsaV3_3G012430/CsaV3_4G001060/CsaV3_1G031430/CsaV3_6G012910/novel.989
BP	GO:0044042	glucan metabolic process	16/817	66/5815	0.0180771	0.508249	CsaV3_1G033150/CsaV3_2G009180/CsaV3_6G007440/CsaV3_6G002560/CsaV3_7G003440/CsaV3_2G036170/CsaV3_4G001040/CsaV3_6G007450/CsaV3_1G031470/CsaV3_3G012430/CsaV3_5G027790/CsaV3_4G001060/CsaV3_1G017280/CsaV3_1G031430/CsaV3_6G012910/novel.989	CsaV3_1G033150/CsaV3_2G009180/CsaV3_6G007440/CsaV3_6G002560/CsaV3_7G003440/CsaV3_2G036170/CsaV3_4G001040/CsaV3_6G007450/CsaV3_1G031470/CsaV3_3G012430/CsaV3_5G027790/CsaV3_4G001060/CsaV3_1G017280/CsaV3_1G031430/CsaV3_6G012910/-	16	8	CsaV3_1G033150/CsaV3_2G009180/CsaV3_6G007440/CsaV3_2G036170/CsaV3_6G007450/CsaV3_1G031470/CsaV3_5G027790/CsaV3_1G017280	8	CsaV3_6G002560/CsaV3_7G003440/CsaV3_4G001040/CsaV3_3G012430/CsaV3_4G001060/CsaV3_1G031430/CsaV3_6G012910/novel.989
BP	GO:0044264	cellular polysaccharide metabolic process	16/817	66/5815	0.0180771	0.508249	CsaV3_1G033150/CsaV3_2G009180/CsaV3_6G007440/CsaV3_6G002560/CsaV3_7G003440/CsaV3_2G036170/CsaV3_4G001040/CsaV3_6G007450/CsaV3_1G031470/CsaV3_3G012430/CsaV3_5G027790/CsaV3_4G001060/CsaV3_1G017280/CsaV3_1G031430/CsaV3_6G012910/novel.989	CsaV3_1G033150/CsaV3_2G009180/CsaV3_6G007440/CsaV3_6G002560/CsaV3_7G003440/CsaV3_2G036170/CsaV3_4G001040/CsaV3_6G007450/CsaV3_1G031470/CsaV3_3G012430/CsaV3_5G027790/CsaV3_4G001060/CsaV3_1G017280/CsaV3_1G031430/CsaV3_6G012910/-	16	8	CsaV3_1G033150/CsaV3_2G009180/CsaV3_6G007440/CsaV3_2G036170/CsaV3_6G007450/CsaV3_1G031470/CsaV3_5G027790/CsaV3_1G017280	8	CsaV3_6G002560/CsaV3_7G003440/CsaV3_4G001040/CsaV3_3G012430/CsaV3_4G001060/CsaV3_1G031430/CsaV3_6G012910/novel.989
BP	GO:0098656	anion transmembrane transport	6/817	17/5815	0.0235665	0.508249	CsaV3_3G030290/CsaV3_1G041910/CsaV3_1G043680/CsaV3_4G007780/CsaV3_1G000720/CsaV3_6G042760	CsaV3_3G030290/CsaV3_1G041910/CsaV3_1G043680/CsaV3_4G007780/CsaV3_1G000720/CsaV3_6G042760	6	2	CsaV3_1G041910/CsaV3_1G000720	4	CsaV3_3G030290/CsaV3_1G043680/CsaV3_4G007780/CsaV3_6G042760
BP	GO:1903825	organic acid transmembrane transport	6/817	17/5815	0.0235665	0.508249	CsaV3_3G030290/CsaV3_1G041910/CsaV3_1G043680/CsaV3_4G007780/CsaV3_1G000720/CsaV3_6G042760	CsaV3_3G030290/CsaV3_1G041910/CsaV3_1G043680/CsaV3_4G007780/CsaV3_1G000720/CsaV3_6G042760	6	2	CsaV3_1G041910/CsaV3_1G000720	4	CsaV3_3G030290/CsaV3_1G043680/CsaV3_4G007780/CsaV3_6G042760
BP	GO:1905039	carboxylic acid transmembrane transport	6/817	17/5815	0.0235665	0.508249	CsaV3_3G030290/CsaV3_1G041910/CsaV3_1G043680/CsaV3_4G007780/CsaV3_1G000720/CsaV3_6G042760	CsaV3_3G030290/CsaV3_1G041910/CsaV3_1G043680/CsaV3_4G007780/CsaV3_1G000720/CsaV3_6G042760	6	2	CsaV3_1G041910/CsaV3_1G000720	4	CsaV3_3G030290/CsaV3_1G043680/CsaV3_4G007780/CsaV3_6G042760
BP	GO:0005976	polysaccharide metabolic process	17/817	74/5815	0.0251737	0.508249	CsaV3_1G033150/CsaV3_2G009180/CsaV3_6G007440/CsaV3_6G002560/CsaV3_7G003440/CsaV3_2G036170/CsaV3_4G001040/CsaV3_6G007450/CsaV3_1G031470/CsaV3_3G012430/CsaV3_7G003840/CsaV3_5G027790/CsaV3_4G001060/CsaV3_1G017280/CsaV3_1G031430/CsaV3_6G012910/novel.989	CsaV3_1G033150/CsaV3_2G009180/CsaV3_6G007440/CsaV3_6G002560/CsaV3_7G003440/CsaV3_2G036170/CsaV3_4G001040/CsaV3_6G007450/CsaV3_1G031470/CsaV3_3G012430/CsaV3_7G003840/CsaV3_5G027790/CsaV3_4G001060/CsaV3_1G017280/CsaV3_1G031430/CsaV3_6G012910/-	17	8	CsaV3_1G033150/CsaV3_2G009180/CsaV3_6G007440/CsaV3_2G036170/CsaV3_6G007450/CsaV3_1G031470/CsaV3_5G027790/CsaV3_1G017280	9	CsaV3_6G002560/CsaV3_7G003440/CsaV3_4G001040/CsaV3_3G012430/CsaV3_7G003840/CsaV3_4G001060/CsaV3_1G031430/CsaV3_6G012910/novel.989
BP	GO:0000271	polysaccharide biosynthetic process	12/817	47/5815	0.0258432	0.508249	CsaV3_1G033150/CsaV3_2G009180/CsaV3_6G007440/CsaV3_6G002560/CsaV3_7G003440/CsaV3_2G036170/CsaV3_4G001040/CsaV3_6G007450/CsaV3_3G012430/CsaV3_4G001060/CsaV3_6G012910/novel.989	CsaV3_1G033150/CsaV3_2G009180/CsaV3_6G007440/CsaV3_6G002560/CsaV3_7G003440/CsaV3_2G036170/CsaV3_4G001040/CsaV3_6G007450/CsaV3_3G012430/CsaV3_4G001060/CsaV3_6G012910/-	12	5	CsaV3_1G033150/CsaV3_2G009180/CsaV3_6G007440/CsaV3_2G036170/CsaV3_6G007450	7	CsaV3_6G002560/CsaV3_7G003440/CsaV3_4G001040/CsaV3_3G012430/CsaV3_4G001060/CsaV3_6G012910/novel.989
BP	GO:0009250	glucan biosynthetic process	12/817	47/5815	0.0258432	0.508249	CsaV3_1G033150/CsaV3_2G009180/CsaV3_6G007440/CsaV3_6G002560/CsaV3_7G003440/CsaV3_2G036170/CsaV3_4G001040/CsaV3_6G007450/CsaV3_3G012430/CsaV3_4G001060/CsaV3_6G012910/novel.989	CsaV3_1G033150/CsaV3_2G009180/CsaV3_6G007440/CsaV3_6G002560/CsaV3_7G003440/CsaV3_2G036170/CsaV3_4G001040/CsaV3_6G007450/CsaV3_3G012430/CsaV3_4G001060/CsaV3_6G012910/-	12	5	CsaV3_1G033150/CsaV3_2G009180/CsaV3_6G007440/CsaV3_2G036170/CsaV3_6G007450	7	CsaV3_6G002560/CsaV3_7G003440/CsaV3_4G001040/CsaV3_3G012430/CsaV3_4G001060/CsaV3_6G012910/novel.989
BP	GO:0033692	cellular polysaccharide biosynthetic process	12/817	47/5815	0.0258432	0.508249	CsaV3_1G033150/CsaV3_2G009180/CsaV3_6G007440/CsaV3_6G002560/CsaV3_7G003440/CsaV3_2G036170/CsaV3_4G001040/CsaV3_6G007450/CsaV3_3G012430/CsaV3_4G001060/CsaV3_6G012910/novel.989	CsaV3_1G033150/CsaV3_2G009180/CsaV3_6G007440/CsaV3_6G002560/CsaV3_7G003440/CsaV3_2G036170/CsaV3_4G001040/CsaV3_6G007450/CsaV3_3G012430/CsaV3_4G001060/CsaV3_6G012910/-	12	5	CsaV3_1G033150/CsaV3_2G009180/CsaV3_6G007440/CsaV3_2G036170/CsaV3_6G007450	7	CsaV3_6G002560/CsaV3_7G003440/CsaV3_4G001040/CsaV3_3G012430/CsaV3_4G001060/CsaV3_6G012910/novel.989
BP	GO:0051273	beta-glucan metabolic process	12/817	47/5815	0.0258432	0.508249	CsaV3_1G033150/CsaV3_2G009180/CsaV3_6G007440/CsaV3_6G002560/CsaV3_7G003440/CsaV3_2G036170/CsaV3_4G001040/CsaV3_6G007450/CsaV3_3G012430/CsaV3_4G001060/CsaV3_6G012910/novel.989	CsaV3_1G033150/CsaV3_2G009180/CsaV3_6G007440/CsaV3_6G002560/CsaV3_7G003440/CsaV3_2G036170/CsaV3_4G001040/CsaV3_6G007450/CsaV3_3G012430/CsaV3_4G001060/CsaV3_6G012910/-	12	5	CsaV3_1G033150/CsaV3_2G009180/CsaV3_6G007440/CsaV3_2G036170/CsaV3_6G007450	7	CsaV3_6G002560/CsaV3_7G003440/CsaV3_4G001040/CsaV3_3G012430/CsaV3_4G001060/CsaV3_6G012910/novel.989
BP	GO:0051274	beta-glucan biosynthetic process	12/817	47/5815	0.0258432	0.508249	CsaV3_1G033150/CsaV3_2G009180/CsaV3_6G007440/CsaV3_6G002560/CsaV3_7G003440/CsaV3_2G036170/CsaV3_4G001040/CsaV3_6G007450/CsaV3_3G012430/CsaV3_4G001060/CsaV3_6G012910/novel.989	CsaV3_1G033150/CsaV3_2G009180/CsaV3_6G007440/CsaV3_6G002560/CsaV3_7G003440/CsaV3_2G036170/CsaV3_4G001040/CsaV3_6G007450/CsaV3_3G012430/CsaV3_4G001060/CsaV3_6G012910/-	12	5	CsaV3_1G033150/CsaV3_2G009180/CsaV3_6G007440/CsaV3_2G036170/CsaV3_6G007450	7	CsaV3_6G002560/CsaV3_7G003440/CsaV3_4G001040/CsaV3_3G012430/CsaV3_4G001060/CsaV3_6G012910/novel.989
BP	GO:0006952	defense response	14/817	59/5815	0.0309559	0.576758	CsaV3_1G045200/CsaV3_7G004460/CsaV3_5G014570/CsaV3_5G017380/CsaV3_2G034530/CsaV3_6G006330/CsaV3_5G014790/CsaV3_2G019810/CsaV3_5G031770/CsaV3_2G036450/CsaV3_5G014880/novel.268/CsaV3_3G021430/CsaV3_5G014810	CsaV3_1G045200/CsaV3_7G004460/CsaV3_5G014570/CsaV3_5G017380/CsaV3_2G034530/CsaV3_6G006330/CsaV3_5G014790/CsaV3_2G019810/CsaV3_5G031770/CsaV3_2G036450/CsaV3_5G014880/-/CsaV3_3G021430/CsaV3_5G014810	14	5	CsaV3_7G004460/CsaV3_5G014570/CsaV3_2G034530/CsaV3_5G031770/CsaV3_3G021430	9	CsaV3_1G045200/CsaV3_5G017380/CsaV3_6G006330/CsaV3_5G014790/CsaV3_2G019810/CsaV3_2G036450/CsaV3_5G014880/novel.268/CsaV3_5G014810
BP	GO:0006694	steroid biosynthetic process	5/817	14/5815	0.0362409	0.641464	CsaV3_3G008190/CsaV3_3G032020/CsaV3_3G008180/CsaV3_2G036590/CsaV3_3G046140	CsaV3_3G008190/CsaV3_3G032020/CsaV3_3G008180/CsaV3_2G036590/CsaV3_3G046140	5	4	CsaV3_3G008190/CsaV3_3G032020/CsaV3_3G008180/CsaV3_2G036590	1	CsaV3_3G046140
BP	GO:0044262	cellular carbohydrate metabolic process	20/817	95/5815	0.038666	0.651799	CsaV3_1G033150/CsaV3_2G009180/CsaV3_6G007440/CsaV3_6G045560/CsaV3_6G002560/CsaV3_7G003440/CsaV3_2G036170/CsaV3_4G001040/CsaV3_6G007450/CsaV3_1G031470/CsaV3_3G016150/CsaV3_3G012430/CsaV3_5G027790/CsaV3_4G001060/CsaV3_1G017280/CsaV3_1G031430/CsaV3_4G004810/CsaV3_1G022900/CsaV3_6G012910/novel.989	CsaV3_1G033150/CsaV3_2G009180/CsaV3_6G007440/CsaV3_6G045560/CsaV3_6G002560/CsaV3_7G003440/CsaV3_2G036170/CsaV3_4G001040/CsaV3_6G007450/CsaV3_1G031470/CsaV3_3G016150/CsaV3_3G012430/CsaV3_5G027790/CsaV3_4G001060/CsaV3_1G017280/CsaV3_1G031430/CsaV3_4G004810/CsaV3_1G022900/CsaV3_6G012910/-	20	11	CsaV3_1G033150/CsaV3_2G009180/CsaV3_6G007440/CsaV3_6G045560/CsaV3_2G036170/CsaV3_6G007450/CsaV3_1G031470/CsaV3_5G027790/CsaV3_1G017280/CsaV3_4G004810/CsaV3_1G022900	9	CsaV3_6G002560/CsaV3_7G003440/CsaV3_4G001040/CsaV3_3G016150/CsaV3_3G012430/CsaV3_4G001060/CsaV3_1G031430/CsaV3_6G012910/novel.989
BP	GO:0009607	response to biotic stimulus	10/817	40/5815	0.0457132	0.735566	CsaV3_1G045200/CsaV3_7G004460/CsaV3_5G014570/CsaV3_5G014790/CsaV3_5G031770/CsaV3_2G036450/CsaV3_5G014880/novel.268/CsaV3_3G021430/CsaV3_5G014810	CsaV3_1G045200/CsaV3_7G004460/CsaV3_5G014570/CsaV3_5G014790/CsaV3_5G031770/CsaV3_2G036450/CsaV3_5G014880/-/CsaV3_3G021430/CsaV3_5G014810	10	4	CsaV3_7G004460/CsaV3_5G014570/CsaV3_5G031770/CsaV3_3G021430	6	CsaV3_1G045200/CsaV3_5G014790/CsaV3_2G036450/CsaV3_5G014880/novel.268/CsaV3_5G014810
BP	GO:0008202	steroid metabolic process	5/817	15/5815	0.04826	0.742784	CsaV3_3G008190/CsaV3_3G032020/CsaV3_3G008180/CsaV3_2G036590/CsaV3_3G046140	CsaV3_3G008190/CsaV3_3G032020/CsaV3_3G008180/CsaV3_2G036590/CsaV3_3G046140	5	4	CsaV3_3G008190/CsaV3_3G032020/CsaV3_3G008180/CsaV3_2G036590	1	CsaV3_3G046140
CC	GO:0009521	photosystem	9/252	36/2096	0.022794	0.470821	CsaV3_2G009680/CsaV3_3G013420/CsaV3_2G010090/CsaV3_1G011330/CsaV3_1G046680/CsaV3_6G042680/CsaV3_4G007600/CsaV3_UNG209270/CsaV3_7G031150	CsaV3_2G009680/CsaV3_3G013420/CsaV3_2G010090/CsaV3_1G011330/CsaV3_1G046680/CsaV3_6G042680/CsaV3_4G007600/CsaV3_UNG209270/CsaV3_7G031150	9	8	CsaV3_2G009680/CsaV3_3G013420/CsaV3_2G010090/CsaV3_1G011330/CsaV3_1G046680/CsaV3_6G042680/CsaV3_4G007600/CsaV3_7G031150	1	CsaV3_UNG209270
CC	GO:0009579	thylakoid	9/252	37/2096	0.0270587	0.470821	CsaV3_2G009680/CsaV3_3G013420/CsaV3_2G010090/CsaV3_1G011330/CsaV3_1G046680/CsaV3_6G042680/CsaV3_4G007600/CsaV3_UNG209270/CsaV3_7G031150	CsaV3_2G009680/CsaV3_3G013420/CsaV3_2G010090/CsaV3_1G011330/CsaV3_1G046680/CsaV3_6G042680/CsaV3_4G007600/CsaV3_UNG209270/CsaV3_7G031150	9	8	CsaV3_2G009680/CsaV3_3G013420/CsaV3_2G010090/CsaV3_1G011330/CsaV3_1G046680/CsaV3_6G042680/CsaV3_4G007600/CsaV3_7G031150	1	CsaV3_UNG209270
CC	GO:0034357	photosynthetic membrane	9/252	37/2096	0.0270587	0.470821	CsaV3_2G009680/CsaV3_3G013420/CsaV3_2G010090/CsaV3_1G011330/CsaV3_1G046680/CsaV3_6G042680/CsaV3_4G007600/CsaV3_UNG209270/CsaV3_7G031150	CsaV3_2G009680/CsaV3_3G013420/CsaV3_2G010090/CsaV3_1G011330/CsaV3_1G046680/CsaV3_6G042680/CsaV3_4G007600/CsaV3_UNG209270/CsaV3_7G031150	9	8	CsaV3_2G009680/CsaV3_3G013420/CsaV3_2G010090/CsaV3_1G011330/CsaV3_1G046680/CsaV3_6G042680/CsaV3_4G007600/CsaV3_7G031150	1	CsaV3_UNG209270
CC	GO:0044436	thylakoid part	9/252	37/2096	0.0270587	0.470821	CsaV3_2G009680/CsaV3_3G013420/CsaV3_2G010090/CsaV3_1G011330/CsaV3_1G046680/CsaV3_6G042680/CsaV3_4G007600/CsaV3_UNG209270/CsaV3_7G031150	CsaV3_2G009680/CsaV3_3G013420/CsaV3_2G010090/CsaV3_1G011330/CsaV3_1G046680/CsaV3_6G042680/CsaV3_4G007600/CsaV3_UNG209270/CsaV3_7G031150	9	8	CsaV3_2G009680/CsaV3_3G013420/CsaV3_2G010090/CsaV3_1G011330/CsaV3_1G046680/CsaV3_6G042680/CsaV3_4G007600/CsaV3_7G031150	1	CsaV3_UNG209270
MF	GO:0016758	transferase activity, transferring hexosyl groups	47/1166	220/8688	0.000673654	0.0544763	CsaV3_6G015940/CsaV3_1G033150/CsaV3_2G009180/CsaV3_4G032420/CsaV3_6G007440/CsaV3_7G006280/CsaV3_4G032430/CsaV3_6G044910/CsaV3_6G009300/CsaV3_6G044870/CsaV3_3G047570/CsaV3_3G035620/CsaV3_5G031040/CsaV3_7G006260/CsaV3_6G014190/CsaV3_6G002560/CsaV3_7G003440/CsaV3_3G015390/CsaV3_2G036170/CsaV3_1G031810/CsaV3_5G032120/CsaV3_4G001040/CsaV3_6G007450/CsaV3_6G040170/CsaV3_2G032140/CsaV3_3G030220/CsaV3_1G0…	CsaV3_6G015940/CsaV3_1G033150/CsaV3_2G009180/CsaV3_4G032420/CsaV3_6G007440/CsaV3_7G006280/CsaV3_4G032430/CsaV3_6G044910/CsaV3_6G009300/CsaV3_6G044870/CsaV3_3G047570/CsaV3_3G035620/CsaV3_5G031040/CsaV3_7G006260/CsaV3_6G014190/CsaV3_6G002560/CsaV3_7G003440/CsaV3_3G015390/CsaV3_2G036170/CsaV3_1G031810/CsaV3_5G032120/CsaV3_4G001040/CsaV3_6G007450/CsaV3_6G040170/CsaV3_2G032140/CsaV3_3G030220/CsaV3_1G0…	47	20	CsaV3_6G015940/CsaV3_1G033150/CsaV3_2G009180/CsaV3_4G032420/CsaV3_6G007440/CsaV3_4G032430/CsaV3_6G044910/CsaV3_6G009300/CsaV3_6G044870/CsaV3_3G035620/CsaV3_2G036170/CsaV3_6G007450/CsaV3_3G030220/CsaV3_1G031470/CsaV3_4G024030/CsaV3_5G027790/CsaV3_7G008380/CsaV3_1G017280/CsaV3_6G044930/CsaV3_7G006650	27	CsaV3_7G006280/CsaV3_3G047570/CsaV3_5G031040/CsaV3_7G006260/CsaV3_6G014190/CsaV3_6G002560/CsaV3_7G003440/CsaV3_3G015390/CsaV3_1G031810/CsaV3_5G032120/CsaV3_4G001040/CsaV3_6G040170/CsaV3_2G032140/CsaV3_3G012430/CsaV3_2G034920/CsaV3_4G001060/CsaV3_6G043470/CsaV3_7G002510/CsaV3_3G044090/CsaV3_1G031430/CsaV3_3G019440/CsaV3_5G033210/CsaV3_6G012910/CsaV3_7G008560/novel.989/CsaV3_1G035800/CsaV3_5G000790
MF	GO:0019842	vitamin binding	19/1166	66/8688	0.000778531	0.0544763	CsaV3_7G029140/CsaV3_7G033940/CsaV3_4G026400/CsaV3_2G026490/CsaV3_6G050730/CsaV3_4G032320/CsaV3_4G006090/CsaV3_3G006730/CsaV3_3G041150/CsaV3_5G003570/CsaV3_6G008140/CsaV3_4G033420/CsaV3_3G000880/CsaV3_3G033240/CsaV3_5G001660/CsaV3_1G004640/CsaV3_4G010390/CsaV3_1G005000/CsaV3_6G053040	CsaV3_7G029140/CsaV3_7G033940/CsaV3_4G026400/CsaV3_2G026490/CsaV3_6G050730/CsaV3_4G032320/CsaV3_4G006090/CsaV3_3G006730/CsaV3_3G041150/CsaV3_5G003570/CsaV3_6G008140/CsaV3_4G033420/CsaV3_3G000880/CsaV3_3G033240/CsaV3_5G001660/CsaV3_1G004640/CsaV3_4G010390/CsaV3_1G005000/CsaV3_6G053040	19	11	CsaV3_7G029140/CsaV3_7G033940/CsaV3_3G006730/CsaV3_3G041150/CsaV3_4G033420/CsaV3_3G033240/CsaV3_5G001660/CsaV3_1G004640/CsaV3_4G010390/CsaV3_1G005000/CsaV3_6G053040	8	CsaV3_4G026400/CsaV3_2G026490/CsaV3_6G050730/CsaV3_4G032320/CsaV3_4G006090/CsaV3_5G003570/CsaV3_6G008140/CsaV3_3G000880
MF	GO:0008171	O-methyltransferase activity	8/1166	17/8688	0.000811119	0.0544763	CsaV3_3G004020/CsaV3_7G003200/CsaV3_3G004010/CsaV3_7G008590/CsaV3_7G003180/CsaV3_4G008590/CsaV3_3G004000/CsaV3_7G001400	CsaV3_3G004020/CsaV3_7G003200/CsaV3_3G004010/CsaV3_7G008590/CsaV3_7G003180/CsaV3_4G008590/CsaV3_3G004000/CsaV3_7G001400	8	4	CsaV3_7G003200/CsaV3_7G008590/CsaV3_7G003180/CsaV3_4G008590	4	CsaV3_3G004020/CsaV3_3G004010/CsaV3_3G004000/CsaV3_7G001400
MF	GO:0016757	transferase activity, transferring glycosyl groups	56/1166	276/8688	0.000828537	0.0544763	CsaV3_6G015940/CsaV3_5G031980/CsaV3_2G028390/CsaV3_1G033150/CsaV3_2G009180/CsaV3_4G032420/CsaV3_6G007440/CsaV3_7G006280/CsaV3_4G032430/CsaV3_6G041760/CsaV3_6G044910/CsaV3_6G009300/CsaV3_3G044870/CsaV3_6G044870/CsaV3_3G047570/CsaV3_7G026310/CsaV3_3G035620/CsaV3_5G031040/CsaV3_7G006260/CsaV3_6G014190/CsaV3_6G002560/CsaV3_7G003440/CsaV3_3G015390/CsaV3_2G036170/CsaV3_1G031810/CsaV3_5G032120/CsaV3_4G0…	CsaV3_6G015940/CsaV3_5G031980/CsaV3_2G028390/CsaV3_1G033150/CsaV3_2G009180/CsaV3_4G032420/CsaV3_6G007440/CsaV3_7G006280/CsaV3_4G032430/CsaV3_6G041760/CsaV3_6G044910/CsaV3_6G009300/CsaV3_3G044870/CsaV3_6G044870/CsaV3_3G047570/CsaV3_7G026310/CsaV3_3G035620/CsaV3_5G031040/CsaV3_7G006260/CsaV3_6G014190/CsaV3_6G002560/CsaV3_7G003440/CsaV3_3G015390/CsaV3_2G036170/CsaV3_1G031810/CsaV3_5G032120/CsaV3_4G0…	56	23	CsaV3_6G015940/CsaV3_2G028390/CsaV3_1G033150/CsaV3_2G009180/CsaV3_4G032420/CsaV3_6G007440/CsaV3_4G032430/CsaV3_6G041760/CsaV3_6G044910/CsaV3_6G009300/CsaV3_6G044870/CsaV3_3G035620/CsaV3_2G036170/CsaV3_6G007450/CsaV3_3G030220/CsaV3_1G031470/CsaV3_4G024030/CsaV3_5G027790/CsaV3_7G008380/CsaV3_1G017280/CsaV3_6G044930/CsaV3_7G006650/CsaV3_1G015730	33	CsaV3_5G031980/CsaV3_7G006280/CsaV3_3G044870/CsaV3_3G047570/CsaV3_7G026310/CsaV3_5G031040/CsaV3_7G006260/CsaV3_6G014190/CsaV3_6G002560/CsaV3_7G003440/CsaV3_3G015390/CsaV3_1G031810/CsaV3_5G032120/CsaV3_4G001040/CsaV3_1G002550/CsaV3_6G040170/CsaV3_2G032140/CsaV3_3G012430/CsaV3_1G008610/CsaV3_3G014630/CsaV3_2G034920/CsaV3_4G001060/CsaV3_6G043470/CsaV3_7G002510/CsaV3_3G044090/CsaV3_1G031430/CsaV3_3G0…
MF	GO:0020037	heme binding	49/1166	240/8688	0.0014881	0.0587537	CsaV3_6G008980/CsaV3_7G000300/CsaV3_6G046880/CsaV3_4G004610/CsaV3_UNG223560/CsaV3_5G015610/CsaV3_6G045860/CsaV3_3G044720/CsaV3_6G043630/CsaV3_3G037130/CsaV3_1G029710/CsaV3_7G006200/CsaV3_7G008610/CsaV3_5G003830/CsaV3_1G039650/CsaV3_6G043650/CsaV3_4G005430/CsaV3_6G042390/CsaV3_5G030890/CsaV3_4G007140/CsaV3_2G014490/CsaV3_UNG160170/CsaV3_3G039990/CsaV3_6G006890/CsaV3_3G041420/CsaV3_3G039940/CsaV3_3…	CsaV3_6G008980/CsaV3_7G000300/CsaV3_6G046880/CsaV3_4G004610/CsaV3_UNG223560/CsaV3_5G015610/CsaV3_6G045860/CsaV3_3G044720/CsaV3_6G043630/CsaV3_3G037130/CsaV3_1G029710/CsaV3_7G006200/CsaV3_7G008610/CsaV3_5G003830/CsaV3_1G039650/CsaV3_6G043650/CsaV3_4G005430/CsaV3_6G042390/CsaV3_5G030890/CsaV3_4G007140/CsaV3_2G014490/CsaV3_UNG160170/CsaV3_3G039990/CsaV3_6G006890/CsaV3_3G041420/CsaV3_3G039940/CsaV3_3…	49	32	CsaV3_6G008980/CsaV3_7G000300/CsaV3_6G046880/CsaV3_4G004610/CsaV3_UNG223560/CsaV3_5G015610/CsaV3_6G045860/CsaV3_6G043630/CsaV3_3G037130/CsaV3_1G029710/CsaV3_7G006200/CsaV3_7G008610/CsaV3_1G039650/CsaV3_6G043650/CsaV3_4G005430/CsaV3_6G042390/CsaV3_UNG160170/CsaV3_3G039990/CsaV3_3G049420/CsaV3_2G035460/CsaV3_6G045870/CsaV3_3G016670/CsaV3_6G045840/CsaV3_2G009060/CsaV3_6G042360/CsaV3_2G036340/CsaV3_5…	17	CsaV3_3G044720/CsaV3_5G003830/CsaV3_5G030890/CsaV3_4G007140/CsaV3_2G014490/CsaV3_6G006890/CsaV3_3G041420/CsaV3_3G039940/CsaV3_3G044670/CsaV3_1G014690/CsaV3_3G049410/CsaV3_5G029550/CsaV3_2G035960/CsaV3_3G009510/CsaV3_3G030690/novel.202/CsaV3_1G009050
MF	GO:0005506	iron ion binding	42/1166	199/8688	0.00162987	0.0587537	CsaV3_6G008980/CsaV3_7G000300/CsaV3_6G046880/CsaV3_5G015610/CsaV3_6G045860/CsaV3_3G044720/CsaV3_6G043630/CsaV3_3G037130/CsaV3_1G029710/CsaV3_7G008610/CsaV3_5G003830/CsaV3_1G039650/CsaV3_6G043650/CsaV3_6G042390/CsaV3_5G030890/CsaV3_4G007140/CsaV3_3G039990/CsaV3_3G041420/CsaV3_3G039940/CsaV3_3G049420/CsaV3_2G035460/CsaV3_6G045870/CsaV3_5G010460/CsaV3_3G044670/CsaV3_6G045840/CsaV3_1G014690/CsaV3_2G0…	CsaV3_6G008980/CsaV3_7G000300/CsaV3_6G046880/CsaV3_5G015610/CsaV3_6G045860/CsaV3_3G044720/CsaV3_6G043630/CsaV3_3G037130/CsaV3_1G029710/CsaV3_7G008610/CsaV3_5G003830/CsaV3_1G039650/CsaV3_6G043650/CsaV3_6G042390/CsaV3_5G030890/CsaV3_4G007140/CsaV3_3G039990/CsaV3_3G041420/CsaV3_3G039940/CsaV3_3G049420/CsaV3_2G035460/CsaV3_6G045870/CsaV3_5G010460/CsaV3_3G044670/CsaV3_6G045840/CsaV3_1G014690/CsaV3_2G0…	42	26	CsaV3_6G008980/CsaV3_7G000300/CsaV3_6G046880/CsaV3_5G015610/CsaV3_6G045860/CsaV3_6G043630/CsaV3_3G037130/CsaV3_1G029710/CsaV3_7G008610/CsaV3_1G039650/CsaV3_6G043650/CsaV3_6G042390/CsaV3_3G039990/CsaV3_3G049420/CsaV3_2G035460/CsaV3_6G045870/CsaV3_5G010460/CsaV3_6G045840/CsaV3_2G009060/CsaV3_6G042360/CsaV3_2G036340/CsaV3_5G011160/novel.526/CsaV3_7G031290/CsaV3_5G030860/CsaV3_3G044650	16	CsaV3_3G044720/CsaV3_5G003830/CsaV3_5G030890/CsaV3_4G007140/CsaV3_3G041420/CsaV3_3G039940/CsaV3_3G044670/CsaV3_1G014690/CsaV3_3G049410/CsaV3_3G017450/CsaV3_5G029550/CsaV3_2G035960/CsaV3_3G009510/CsaV3_3G030690/novel.202/CsaV3_1G009050
MF	GO:0003700	DNA binding transcription factor activity	63/1166	328/8688	0.00174011	0.0587537	CsaV3_4G033470/CsaV3_3G018600/CsaV3_2G030170/CsaV3_3G016760/CsaV3_1G041310/CsaV3_6G005100/CsaV3_4G028670/CsaV3_4G000990/CsaV3_5G003250/CsaV3_1G012520/CsaV3_7G008630/CsaV3_7G005810/CsaV3_2G010320/CsaV3_3G002570/CsaV3_4G035380/CsaV3_3G023720/CsaV3_5G005890/CsaV3_5G005600/CsaV3_3G033000/CsaV3_6G052610/CsaV3_2G017760/CsaV3_3G007180/CsaV3_3G007560/CsaV3_2G012140/CsaV3_3G048560/CsaV3_6G022740/CsaV3_7G0…	CsaV3_4G033470/CsaV3_3G018600/CsaV3_2G030170/CsaV3_3G016760/CsaV3_1G041310/CsaV3_6G005100/CsaV3_4G028670/CsaV3_4G000990/CsaV3_5G003250/CsaV3_1G012520/CsaV3_7G008630/CsaV3_7G005810/CsaV3_2G010320/CsaV3_3G002570/CsaV3_4G035380/CsaV3_3G023720/CsaV3_5G005890/CsaV3_5G005600/CsaV3_3G033000/CsaV3_6G052610/CsaV3_2G017760/CsaV3_3G007180/CsaV3_3G007560/CsaV3_2G012140/CsaV3_3G048560/CsaV3_6G022740/CsaV3_7G0…	63	18	CsaV3_2G030170/CsaV3_6G005100/CsaV3_4G000990/CsaV3_2G010320/CsaV3_3G048560/CsaV3_7G000520/CsaV3_6G050560/CsaV3_6G048830/CsaV3_7G031730/CsaV3_6G044300/CsaV3_4G024330/CsaV3_3G014920/CsaV3_2G035830/CsaV3_2G032370/CsaV3_7G000510/CsaV3_7G031430/CsaV3_6G050570/CsaV3_5G001400	45	CsaV3_4G033470/CsaV3_3G018600/CsaV3_3G016760/CsaV3_1G041310/CsaV3_4G028670/CsaV3_5G003250/CsaV3_1G012520/CsaV3_7G008630/CsaV3_7G005810/CsaV3_3G002570/CsaV3_4G035380/CsaV3_3G023720/CsaV3_5G005890/CsaV3_5G005600/CsaV3_3G033000/CsaV3_6G052610/CsaV3_2G017760/CsaV3_3G007180/CsaV3_3G007560/CsaV3_2G012140/CsaV3_6G022740/CsaV3_7G003470/CsaV3_3G008610/CsaV3_6G007740/CsaV3_2G033550/CsaV3_4G035230/CsaV3_6G0…
MF	GO:0046906	tetrapyrrole binding	49/1166	242/8688	0.00178719	0.0587537	CsaV3_6G008980/CsaV3_7G000300/CsaV3_6G046880/CsaV3_4G004610/CsaV3_UNG223560/CsaV3_5G015610/CsaV3_6G045860/CsaV3_3G044720/CsaV3_6G043630/CsaV3_3G037130/CsaV3_1G029710/CsaV3_7G006200/CsaV3_7G008610/CsaV3_5G003830/CsaV3_1G039650/CsaV3_6G043650/CsaV3_4G005430/CsaV3_6G042390/CsaV3_5G030890/CsaV3_4G007140/CsaV3_2G014490/CsaV3_UNG160170/CsaV3_3G039990/CsaV3_6G006890/CsaV3_3G041420/CsaV3_3G039940/CsaV3_3…	CsaV3_6G008980/CsaV3_7G000300/CsaV3_6G046880/CsaV3_4G004610/CsaV3_UNG223560/CsaV3_5G015610/CsaV3_6G045860/CsaV3_3G044720/CsaV3_6G043630/CsaV3_3G037130/CsaV3_1G029710/CsaV3_7G006200/CsaV3_7G008610/CsaV3_5G003830/CsaV3_1G039650/CsaV3_6G043650/CsaV3_4G005430/CsaV3_6G042390/CsaV3_5G030890/CsaV3_4G007140/CsaV3_2G014490/CsaV3_UNG160170/CsaV3_3G039990/CsaV3_6G006890/CsaV3_3G041420/CsaV3_3G039940/CsaV3_3…	49	32	CsaV3_6G008980/CsaV3_7G000300/CsaV3_6G046880/CsaV3_4G004610/CsaV3_UNG223560/CsaV3_5G015610/CsaV3_6G045860/CsaV3_6G043630/CsaV3_3G037130/CsaV3_1G029710/CsaV3_7G006200/CsaV3_7G008610/CsaV3_1G039650/CsaV3_6G043650/CsaV3_4G005430/CsaV3_6G042390/CsaV3_UNG160170/CsaV3_3G039990/CsaV3_3G049420/CsaV3_2G035460/CsaV3_6G045870/CsaV3_3G016670/CsaV3_6G045840/CsaV3_2G009060/CsaV3_6G042360/CsaV3_2G036340/CsaV3_5…	17	CsaV3_3G044720/CsaV3_5G003830/CsaV3_5G030890/CsaV3_4G007140/CsaV3_2G014490/CsaV3_6G006890/CsaV3_3G041420/CsaV3_3G039940/CsaV3_3G044670/CsaV3_1G014690/CsaV3_3G049410/CsaV3_5G029550/CsaV3_2G035960/CsaV3_3G009510/CsaV3_3G030690/novel.202/CsaV3_1G009050
MF	GO:0016705	oxidoreductase activity, acting on paired donors, with incorporation or reduction of molecular oxygen	42/1166	202/8688	0.00219772	0.0610814	CsaV3_6G008980/CsaV3_7G000300/CsaV3_6G046880/CsaV3_5G015610/CsaV3_6G045860/CsaV3_3G044720/CsaV3_6G043630/CsaV3_3G037130/CsaV3_1G029710/CsaV3_2G025870/CsaV3_7G008610/CsaV3_5G003830/CsaV3_1G039650/CsaV3_6G043650/CsaV3_6G042390/CsaV3_5G030890/CsaV3_4G007140/CsaV3_2G001370/CsaV3_3G039990/CsaV3_3G041420/CsaV3_3G039940/CsaV3_3G049420/CsaV3_2G035460/CsaV3_6G045870/CsaV3_3G044670/CsaV3_6G045840/CsaV3_1G0…	CsaV3_6G008980/CsaV3_7G000300/CsaV3_6G046880/CsaV3_5G015610/CsaV3_6G045860/CsaV3_3G044720/CsaV3_6G043630/CsaV3_3G037130/CsaV3_1G029710/CsaV3_2G025870/CsaV3_7G008610/CsaV3_5G003830/CsaV3_1G039650/CsaV3_6G043650/CsaV3_6G042390/CsaV3_5G030890/CsaV3_4G007140/CsaV3_2G001370/CsaV3_3G039990/CsaV3_3G041420/CsaV3_3G039940/CsaV3_3G049420/CsaV3_2G035460/CsaV3_6G045870/CsaV3_3G044670/CsaV3_6G045840/CsaV3_1G0…	42	27	CsaV3_6G008980/CsaV3_7G000300/CsaV3_6G046880/CsaV3_5G015610/CsaV3_6G045860/CsaV3_6G043630/CsaV3_3G037130/CsaV3_1G029710/CsaV3_2G025870/CsaV3_7G008610/CsaV3_1G039650/CsaV3_6G043650/CsaV3_6G042390/CsaV3_2G001370/CsaV3_3G039990/CsaV3_3G049420/CsaV3_2G035460/CsaV3_6G045870/CsaV3_6G045840/CsaV3_2G009060/CsaV3_6G042360/CsaV3_2G036340/CsaV3_5G011160/novel.526/CsaV3_7G031290/CsaV3_5G030860/CsaV3_3G044650	15	CsaV3_3G044720/CsaV3_5G003830/CsaV3_5G030890/CsaV3_4G007140/CsaV3_3G041420/CsaV3_3G039940/CsaV3_3G044670/CsaV3_1G014690/CsaV3_3G049410/CsaV3_5G029550/CsaV3_2G035960/CsaV3_3G009510/CsaV3_3G030690/novel.202/CsaV3_1G009050
MF	GO:0140110	transcription regulator activity	66/1166	353/8688	0.00273622	0.0610814	CsaV3_4G033470/CsaV3_3G018600/CsaV3_2G030170/CsaV3_3G016760/CsaV3_1G041310/CsaV3_6G005100/CsaV3_4G028670/CsaV3_4G000990/CsaV3_5G003250/CsaV3_1G012520/CsaV3_7G008630/CsaV3_7G005810/CsaV3_2G010320/CsaV3_3G002570/CsaV3_4G035380/CsaV3_3G023720/CsaV3_5G005890/CsaV3_5G005600/CsaV3_3G033000/CsaV3_6G052610/CsaV3_2G017760/CsaV3_3G007180/CsaV3_1G005240/CsaV3_3G007560/CsaV3_2G012140/CsaV3_3G048560/CsaV3_6G0…	CsaV3_4G033470/CsaV3_3G018600/CsaV3_2G030170/CsaV3_3G016760/CsaV3_1G041310/CsaV3_6G005100/CsaV3_4G028670/CsaV3_4G000990/CsaV3_5G003250/CsaV3_1G012520/CsaV3_7G008630/CsaV3_7G005810/CsaV3_2G010320/CsaV3_3G002570/CsaV3_4G035380/CsaV3_3G023720/CsaV3_5G005890/CsaV3_5G005600/CsaV3_3G033000/CsaV3_6G052610/CsaV3_2G017760/CsaV3_3G007180/CsaV3_1G005240/CsaV3_3G007560/CsaV3_2G012140/CsaV3_3G048560/CsaV3_6G0…	66	18	CsaV3_2G030170/CsaV3_6G005100/CsaV3_4G000990/CsaV3_2G010320/CsaV3_3G048560/CsaV3_7G000520/CsaV3_6G050560/CsaV3_6G048830/CsaV3_7G031730/CsaV3_6G044300/CsaV3_4G024330/CsaV3_3G014920/CsaV3_2G035830/CsaV3_2G032370/CsaV3_7G000510/CsaV3_7G031430/CsaV3_6G050570/CsaV3_5G001400	48	CsaV3_4G033470/CsaV3_3G018600/CsaV3_3G016760/CsaV3_1G041310/CsaV3_4G028670/CsaV3_5G003250/CsaV3_1G012520/CsaV3_7G008630/CsaV3_7G005810/CsaV3_3G002570/CsaV3_4G035380/CsaV3_3G023720/CsaV3_5G005890/CsaV3_5G005600/CsaV3_3G033000/CsaV3_6G052610/CsaV3_2G017760/CsaV3_3G007180/CsaV3_1G005240/CsaV3_3G007560/CsaV3_2G012140/CsaV3_6G022740/CsaV3_7G003470/CsaV3_3G008610/CsaV3_6G007740/CsaV3_2G033550/CsaV3_4G0…
MF	GO:0016759	cellulose synthase activity	11/1166	33/8688	0.00278698	0.0610814	CsaV3_1G033150/CsaV3_2G009180/CsaV3_6G007440/CsaV3_6G002560/CsaV3_7G003440/CsaV3_2G036170/CsaV3_4G001040/CsaV3_6G007450/CsaV3_3G012430/CsaV3_4G001060/novel.989	CsaV3_1G033150/CsaV3_2G009180/CsaV3_6G007440/CsaV3_6G002560/CsaV3_7G003440/CsaV3_2G036170/CsaV3_4G001040/CsaV3_6G007450/CsaV3_3G012430/CsaV3_4G001060/-	11	5	CsaV3_1G033150/CsaV3_2G009180/CsaV3_6G007440/CsaV3_2G036170/CsaV3_6G007450	6	CsaV3_6G002560/CsaV3_7G003440/CsaV3_4G001040/CsaV3_3G012430/CsaV3_4G001060/novel.989
MF	GO:0016760	cellulose synthase (UDP-forming) activity	11/1166	33/8688	0.00278698	0.0610814	CsaV3_1G033150/CsaV3_2G009180/CsaV3_6G007440/CsaV3_6G002560/CsaV3_7G003440/CsaV3_2G036170/CsaV3_4G001040/CsaV3_6G007450/CsaV3_3G012430/CsaV3_4G001060/novel.989	CsaV3_1G033150/CsaV3_2G009180/CsaV3_6G007440/CsaV3_6G002560/CsaV3_7G003440/CsaV3_2G036170/CsaV3_4G001040/CsaV3_6G007450/CsaV3_3G012430/CsaV3_4G001060/-	11	5	CsaV3_1G033150/CsaV3_2G009180/CsaV3_6G007440/CsaV3_2G036170/CsaV3_6G007450	6	CsaV3_6G002560/CsaV3_7G003440/CsaV3_4G001040/CsaV3_3G012430/CsaV3_4G001060/novel.989
MF	GO:0046982	protein heterodimerization activity	15/1166	55/8688	0.00476382	0.0963758	CsaV3_6G002190/CsaV3_6G017150/CsaV3_6G017030/CsaV3_6G017040/CsaV3_7G025320/CsaV3_6G009670/CsaV3_6G040150/CsaV3_6G017120/CsaV3_UNG131020/CsaV3_6G003690/CsaV3_6G017110/CsaV3_1G014090/CsaV3_1G014110/CsaV3_1G042610/CsaV3_1G012840	CsaV3_6G002190/CsaV3_6G017150/CsaV3_6G017030/CsaV3_6G017040/CsaV3_7G025320/CsaV3_6G009670/CsaV3_6G040150/CsaV3_6G017120/CsaV3_UNG131020/CsaV3_6G003690/CsaV3_6G017110/CsaV3_1G014090/CsaV3_1G014110/CsaV3_1G042610/CsaV3_1G012840	15	0		15	CsaV3_6G002190/CsaV3_6G017150/CsaV3_6G017030/CsaV3_6G017040/CsaV3_7G025320/CsaV3_6G009670/CsaV3_6G040150/CsaV3_6G017120/CsaV3_UNG131020/CsaV3_6G003690/CsaV3_6G017110/CsaV3_1G014090/CsaV3_1G014110/CsaV3_1G042610/CsaV3_1G012840
MF	GO:0008194	UDP-glycosyltransferase activity	20/1166	84/8688	0.00669312	0.125735	CsaV3_1G033150/CsaV3_2G009180/CsaV3_6G007440/CsaV3_3G035620/CsaV3_5G031040/CsaV3_6G002560/CsaV3_7G003440/CsaV3_2G036170/CsaV3_1G031810/CsaV3_4G001040/CsaV3_6G007450/CsaV3_2G032140/CsaV3_3G012430/CsaV3_4G001060/CsaV3_6G043470/CsaV3_7G002510/CsaV3_3G044090/CsaV3_3G019440/CsaV3_6G012910/novel.989	CsaV3_1G033150/CsaV3_2G009180/CsaV3_6G007440/CsaV3_3G035620/CsaV3_5G031040/CsaV3_6G002560/CsaV3_7G003440/CsaV3_2G036170/CsaV3_1G031810/CsaV3_4G001040/CsaV3_6G007450/CsaV3_2G032140/CsaV3_3G012430/CsaV3_4G001060/CsaV3_6G043470/CsaV3_7G002510/CsaV3_3G044090/CsaV3_3G019440/CsaV3_6G012910/-	20	6	CsaV3_1G033150/CsaV3_2G009180/CsaV3_6G007440/CsaV3_3G035620/CsaV3_2G036170/CsaV3_6G007450	14	CsaV3_5G031040/CsaV3_6G002560/CsaV3_7G003440/CsaV3_1G031810/CsaV3_4G001040/CsaV3_2G032140/CsaV3_3G012430/CsaV3_4G001060/CsaV3_6G043470/CsaV3_7G002510/CsaV3_3G044090/CsaV3_3G019440/CsaV3_6G012910/novel.989
MF	GO:0030170	pyridoxal phosphate binding	15/1166	58/8688	0.00808952	0.132971	CsaV3_7G033940/CsaV3_2G026490/CsaV3_4G032320/CsaV3_4G006090/CsaV3_3G006730/CsaV3_3G041150/CsaV3_5G003570/CsaV3_6G008140/CsaV3_4G033420/CsaV3_3G000880/CsaV3_3G033240/CsaV3_5G001660/CsaV3_1G004640/CsaV3_1G005000/CsaV3_6G053040	CsaV3_7G033940/CsaV3_2G026490/CsaV3_4G032320/CsaV3_4G006090/CsaV3_3G006730/CsaV3_3G041150/CsaV3_5G003570/CsaV3_6G008140/CsaV3_4G033420/CsaV3_3G000880/CsaV3_3G033240/CsaV3_5G001660/CsaV3_1G004640/CsaV3_1G005000/CsaV3_6G053040	15	9	CsaV3_7G033940/CsaV3_3G006730/CsaV3_3G041150/CsaV3_4G033420/CsaV3_3G033240/CsaV3_5G001660/CsaV3_1G004640/CsaV3_1G005000/CsaV3_6G053040	6	CsaV3_2G026490/CsaV3_4G032320/CsaV3_4G006090/CsaV3_5G003570/CsaV3_6G008140/CsaV3_3G000880
MF	GO:0070279	vitamin B6 binding	15/1166	58/8688	0.00808952	0.132971	CsaV3_7G033940/CsaV3_2G026490/CsaV3_4G032320/CsaV3_4G006090/CsaV3_3G006730/CsaV3_3G041150/CsaV3_5G003570/CsaV3_6G008140/CsaV3_4G033420/CsaV3_3G000880/CsaV3_3G033240/CsaV3_5G001660/CsaV3_1G004640/CsaV3_1G005000/CsaV3_6G053040	CsaV3_7G033940/CsaV3_2G026490/CsaV3_4G032320/CsaV3_4G006090/CsaV3_3G006730/CsaV3_3G041150/CsaV3_5G003570/CsaV3_6G008140/CsaV3_4G033420/CsaV3_3G000880/CsaV3_3G033240/CsaV3_5G001660/CsaV3_1G004640/CsaV3_1G005000/CsaV3_6G053040	15	9	CsaV3_7G033940/CsaV3_3G006730/CsaV3_3G041150/CsaV3_4G033420/CsaV3_3G033240/CsaV3_5G001660/CsaV3_1G004640/CsaV3_1G005000/CsaV3_6G053040	6	CsaV3_2G026490/CsaV3_4G032320/CsaV3_4G006090/CsaV3_5G003570/CsaV3_6G008140/CsaV3_3G000880
MF	GO:0016765	transferase activity, transferring alkyl or aryl (other than methyl) groups	8/1166	24/8688	0.0103504	0.159463	CsaV3_2G008500/CsaV3_6G039940/CsaV3_1G038260/CsaV3_1G031480/CsaV3_7G030490/CsaV3_2G029790/CsaV3_7G006800/CsaV3_2G007090	CsaV3_2G008500/CsaV3_6G039940/CsaV3_1G038260/CsaV3_1G031480/CsaV3_7G030490/CsaV3_2G029790/CsaV3_7G006800/CsaV3_2G007090	8	3	CsaV3_6G039940/CsaV3_1G031480/CsaV3_2G029790	5	CsaV3_2G008500/CsaV3_1G038260/CsaV3_7G030490/CsaV3_7G006800/CsaV3_2G007090
MF	GO:0005509	calcium ion binding	26/1166	123/8688	0.0113968	0.159463	CsaV3_3G021210/CsaV3_2G027840/CsaV3_5G038130/CsaV3_2G034220/CsaV3_3G049770/CsaV3_1G011330/CsaV3_6G042680/CsaV3_2G027850/CsaV3_2G027860/CsaV3_3G004350/CsaV3_2G025590/CsaV3_1G004290/CsaV3_5G037010/CsaV3_2G013830/CsaV3_2G027890/CsaV3_4G027680/CsaV3_5G028580/CsaV3_4G003420/CsaV3_1G014860/CsaV3_6G008990/CsaV3_2G016890/CsaV3_5G033780/CsaV3_6G006120/CsaV3_3G015240/CsaV3_3G027200/CsaV3_7G031150	CsaV3_3G021210/CsaV3_2G027840/CsaV3_5G038130/CsaV3_2G034220/CsaV3_3G049770/CsaV3_1G011330/CsaV3_6G042680/CsaV3_2G027850/CsaV3_2G027860/CsaV3_3G004350/CsaV3_2G025590/CsaV3_1G004290/CsaV3_5G037010/CsaV3_2G013830/CsaV3_2G027890/CsaV3_4G027680/CsaV3_5G028580/CsaV3_4G003420/CsaV3_1G014860/CsaV3_6G008990/CsaV3_2G016890/CsaV3_5G033780/CsaV3_6G006120/CsaV3_3G015240/CsaV3_3G027200/CsaV3_7G031150	26	7	CsaV3_1G011330/CsaV3_6G042680/CsaV3_3G004350/CsaV3_2G025590/CsaV3_4G027680/CsaV3_6G008990/CsaV3_7G031150	19	CsaV3_3G021210/CsaV3_2G027840/CsaV3_5G038130/CsaV3_2G034220/CsaV3_3G049770/CsaV3_2G027850/CsaV3_2G027860/CsaV3_1G004290/CsaV3_5G037010/CsaV3_2G013830/CsaV3_2G027890/CsaV3_5G028580/CsaV3_4G003420/CsaV3_1G014860/CsaV3_2G016890/CsaV3_5G033780/CsaV3_6G006120/CsaV3_3G015240/CsaV3_3G027200
MF	GO:0005215	transporter activity	74/1166	428/8688	0.0115201	0.159463	CsaV3_5G003220/CsaV3_2G009630/CsaV3_4G026660/CsaV3_3G014030/CsaV3_4G028730/CsaV3_4G000720/CsaV3_5G004800/CsaV3_5G030540/CsaV3_5G036750/CsaV3_3G021600/CsaV3_5G032350/CsaV3_4G009300/CsaV3_7G029170/CsaV3_1G001720/CsaV3_3G030290/CsaV3_6G051320/CsaV3_5G034790/CsaV3_3G041460/CsaV3_5G001290/novel.399/CsaV3_5G031190/CsaV3_5G029720/CsaV3_2G012580/CsaV3_6G003430/CsaV3_1G007650/CsaV3_1G032620/CsaV3_3G001980…	CsaV3_5G003220/CsaV3_2G009630/CsaV3_4G026660/CsaV3_3G014030/CsaV3_4G028730/CsaV3_4G000720/CsaV3_5G004800/CsaV3_5G030540/CsaV3_5G036750/CsaV3_3G021600/CsaV3_5G032350/CsaV3_4G009300/CsaV3_7G029170/CsaV3_1G001720/CsaV3_3G030290/CsaV3_6G051320/CsaV3_5G034790/CsaV3_3G041460/CsaV3_5G001290/-/CsaV3_5G031190/CsaV3_5G029720/CsaV3_2G012580/CsaV3_6G003430/CsaV3_1G007650/CsaV3_1G032620/CsaV3_3G001980/CsaV3_6…	74	28	CsaV3_5G003220/CsaV3_2G009630/CsaV3_4G026660/CsaV3_4G028730/CsaV3_4G000720/CsaV3_5G036750/CsaV3_3G021600/CsaV3_5G032350/CsaV3_6G051320/CsaV3_5G034790/CsaV3_3G041460/CsaV3_5G029720/CsaV3_1G007650/CsaV3_2G029210/CsaV3_2G025600/CsaV3_3G047190/CsaV3_5G040020/CsaV3_7G003650/CsaV3_6G002740/CsaV3_6G051150/CsaV3_2G008060/CsaV3_2G014540/CsaV3_4G009550/CsaV3_4G006290/CsaV3_3G011530/CsaV3_3G010810/CsaV3_3G0…	46	CsaV3_3G014030/CsaV3_5G004800/CsaV3_5G030540/CsaV3_4G009300/CsaV3_7G029170/CsaV3_1G001720/CsaV3_3G030290/CsaV3_5G001290/novel.399/CsaV3_5G031190/CsaV3_2G012580/CsaV3_6G003430/CsaV3_1G032620/CsaV3_3G001980/CsaV3_6G043870/CsaV3_7G023320/CsaV3_3G001000/CsaV3_5G013270/CsaV3_7G000830/CsaV3_3G026760/CsaV3_1G043680/CsaV3_5G004810/CsaV3_6G015260/CsaV3_3G026660/CsaV3_6G052240/CsaV3_4G007780/CsaV3_3G008110…
MF	GO:0016747	transferase activity, transferring acyl groups other than amino-acyl groups	25/1166	120/8688	0.0154406	0.203044	CsaV3_1G033850/CsaV3_1G033860/CsaV3_7G001070/CsaV3_4G003620/CsaV3_7G018620/CsaV3_5G031780/CsaV3_6G014580/CsaV3_3G034110/CsaV3_7G034580/CsaV3_1G005240/CsaV3_7G031830/CsaV3_2G028690/CsaV3_5G036180/CsaV3_1G030900/CsaV3_2G035810/CsaV3_1G033880/CsaV3_5G036170/CsaV3_4G000580/CsaV3_1G009120/CsaV3_2G010330/CsaV3_1G000360/CsaV3_3G011240/CsaV3_3G032780/CsaV3_3G045460/CsaV3_3G028180	CsaV3_1G033850/CsaV3_1G033860/CsaV3_7G001070/CsaV3_4G003620/CsaV3_7G018620/CsaV3_5G031780/CsaV3_6G014580/CsaV3_3G034110/CsaV3_7G034580/CsaV3_1G005240/CsaV3_7G031830/CsaV3_2G028690/CsaV3_5G036180/CsaV3_1G030900/CsaV3_2G035810/CsaV3_1G033880/CsaV3_5G036170/CsaV3_4G000580/CsaV3_1G009120/CsaV3_2G010330/CsaV3_1G000360/CsaV3_3G011240/CsaV3_3G032780/CsaV3_3G045460/CsaV3_3G028180	25	11	CsaV3_7G001070/CsaV3_7G018620/CsaV3_5G031780/CsaV3_6G014580/CsaV3_3G034110/CsaV3_7G034580/CsaV3_7G031830/CsaV3_2G035810/CsaV3_4G000580/CsaV3_2G010330/CsaV3_3G045460	14	CsaV3_1G033850/CsaV3_1G033860/CsaV3_4G003620/CsaV3_1G005240/CsaV3_2G028690/CsaV3_5G036180/CsaV3_1G030900/CsaV3_1G033880/CsaV3_5G036170/CsaV3_1G009120/CsaV3_1G000360/CsaV3_3G011240/CsaV3_3G032780/CsaV3_3G028180
MF	GO:0046527	glucosyltransferase activity	16/1166	70/8688	0.0209955	0.250387	CsaV3_1G033150/CsaV3_2G009180/CsaV3_6G007440/CsaV3_6G002560/CsaV3_7G003440/CsaV3_2G036170/CsaV3_4G001040/CsaV3_6G007450/CsaV3_1G031470/CsaV3_3G012430/CsaV3_5G027790/CsaV3_4G001060/CsaV3_1G017280/CsaV3_1G031430/CsaV3_6G012910/novel.989	CsaV3_1G033150/CsaV3_2G009180/CsaV3_6G007440/CsaV3_6G002560/CsaV3_7G003440/CsaV3_2G036170/CsaV3_4G001040/CsaV3_6G007450/CsaV3_1G031470/CsaV3_3G012430/CsaV3_5G027790/CsaV3_4G001060/CsaV3_1G017280/CsaV3_1G031430/CsaV3_6G012910/-	16	8	CsaV3_1G033150/CsaV3_2G009180/CsaV3_6G007440/CsaV3_2G036170/CsaV3_6G007450/CsaV3_1G031470/CsaV3_5G027790/CsaV3_1G017280	8	CsaV3_6G002560/CsaV3_7G003440/CsaV3_4G001040/CsaV3_3G012430/CsaV3_4G001060/CsaV3_1G031430/CsaV3_6G012910/novel.989
MF	GO:0046983	protein dimerization activity	42/1166	230/8688	0.0216988	0.250387	CsaV3_2G028950/CsaV3_3G004020/CsaV3_7G003200/CsaV3_3G004010/CsaV3_1G006280/CsaV3_2G025890/CsaV3_6G002190/CsaV3_6G008210/CsaV3_6G017150/CsaV3_3G007980/CsaV3_2G007180/CsaV3_4G008590/CsaV3_6G017030/CsaV3_5G005600/CsaV3_3G004000/CsaV3_7G025510/CsaV3_3G001710/CsaV3_6G017040/CsaV3_7G025320/CsaV3_7G001400/CsaV3_6G009670/CsaV3_6G040150/CsaV3_6G017120/CsaV3_UNG131020/CsaV3_1G042640/CsaV3_3G032080/CsaV3_4G…	CsaV3_2G028950/CsaV3_3G004020/CsaV3_7G003200/CsaV3_3G004010/CsaV3_1G006280/CsaV3_2G025890/CsaV3_6G002190/CsaV3_6G008210/CsaV3_6G017150/CsaV3_3G007980/CsaV3_2G007180/CsaV3_4G008590/CsaV3_6G017030/CsaV3_5G005600/CsaV3_3G004000/CsaV3_7G025510/CsaV3_3G001710/CsaV3_6G017040/CsaV3_7G025320/CsaV3_7G001400/CsaV3_6G009670/CsaV3_6G040150/CsaV3_6G017120/CsaV3_UNG131020/CsaV3_1G042640/CsaV3_3G032080/CsaV3_4G…	42	10	CsaV3_7G003200/CsaV3_1G006280/CsaV3_2G025890/CsaV3_4G008590/CsaV3_7G025510/CsaV3_1G042640/CsaV3_1G037910/CsaV3_7G035000/CsaV3_1G039160/CsaV3_6G047120	32	CsaV3_2G028950/CsaV3_3G004020/CsaV3_3G004010/CsaV3_6G002190/CsaV3_6G008210/CsaV3_6G017150/CsaV3_3G007980/CsaV3_2G007180/CsaV3_6G017030/CsaV3_5G005600/CsaV3_3G004000/CsaV3_3G001710/CsaV3_6G017040/CsaV3_7G025320/CsaV3_7G001400/CsaV3_6G009670/CsaV3_6G040150/CsaV3_6G017120/CsaV3_UNG131020/CsaV3_3G032080/CsaV3_4G032110/CsaV3_6G003690/CsaV3_6G017110/CsaV3_6G044570/CsaV3_1G014090/CsaV3_1G014110/CsaV3_1G…
MF	GO:0008374	O-acyltransferase activity	5/1166	13/8688	0.0218969	0.250387	CsaV3_7G018620/CsaV3_6G014580/CsaV3_7G034580/CsaV3_2G010330/CsaV3_3G028180	CsaV3_7G018620/CsaV3_6G014580/CsaV3_7G034580/CsaV3_2G010330/CsaV3_3G028180	5	4	CsaV3_7G018620/CsaV3_6G014580/CsaV3_7G034580/CsaV3_2G010330	1	CsaV3_3G028180
MF	GO:0035251	UDP-glucosyltransferase activity	12/1166	50/8688	0.029814	0.326712	CsaV3_1G033150/CsaV3_2G009180/CsaV3_6G007440/CsaV3_6G002560/CsaV3_7G003440/CsaV3_2G036170/CsaV3_4G001040/CsaV3_6G007450/CsaV3_3G012430/CsaV3_4G001060/CsaV3_6G012910/novel.989	CsaV3_1G033150/CsaV3_2G009180/CsaV3_6G007440/CsaV3_6G002560/CsaV3_7G003440/CsaV3_2G036170/CsaV3_4G001040/CsaV3_6G007450/CsaV3_3G012430/CsaV3_4G001060/CsaV3_6G012910/-	12	5	CsaV3_1G033150/CsaV3_2G009180/CsaV3_6G007440/CsaV3_2G036170/CsaV3_6G007450	7	CsaV3_6G002560/CsaV3_7G003440/CsaV3_4G001040/CsaV3_3G012430/CsaV3_4G001060/CsaV3_6G012910/novel.989

## Sheet: XS_30vsXN_30DAP GO
Category	GOID	Description	GeneRatio	BgRatio	pvalue	padj	geneID	geneName	Count	Up	Up_Gene_id	Down	Down_Gene_id
BP	GO:0072524	pyridine-containing compound metabolic process	22/1218	41/5833	3.58936e-06	0.000285949	CsaV3_7G022930/CsaV3_6G040390/CsaV3_2G013320/CsaV3_5G034910/CsaV3_6G040340/CsaV3_2G004240/CsaV3_6G048080/CsaV3_3G023460/CsaV3_5G028490/CsaV3_3G033790/CsaV3_5G038830/CsaV3_7G021470/CsaV3_4G004200/CsaV3_3G021780/CsaV3_4G037690/CsaV3_2G028640/CsaV3_6G040430/CsaV3_1G037750/CsaV3_5G028690/CsaV3_1G046070/CsaV3_6G048680/CsaV3_4G008960	CsaV3_7G022930/CsaV3_6G040390/CsaV3_2G013320/CsaV3_5G034910/CsaV3_6G040340/CsaV3_2G004240/CsaV3_6G048080/CsaV3_3G023460/CsaV3_5G028490/CsaV3_3G033790/CsaV3_5G038830/CsaV3_7G021470/CsaV3_4G004200/CsaV3_3G021780/CsaV3_4G037690/CsaV3_2G028640/CsaV3_6G040430/CsaV3_1G037750/CsaV3_5G028690/CsaV3_1G046070/CsaV3_6G048680/CsaV3_4G008960	22	15	CsaV3_7G022930/CsaV3_6G040390/CsaV3_2G013320/CsaV3_6G040340/CsaV3_2G004240/CsaV3_5G028490/CsaV3_5G038830/CsaV3_3G021780/CsaV3_4G037690/CsaV3_2G028640/CsaV3_6G040430/CsaV3_1G037750/CsaV3_5G028690/CsaV3_1G046070/CsaV3_6G048680	7	CsaV3_5G034910/CsaV3_6G048080/CsaV3_3G023460/CsaV3_3G033790/CsaV3_7G021470/CsaV3_4G004200/CsaV3_4G008960
BP	GO:0009142	nucleoside triphosphate biosynthetic process	24/1218	47/5833	4.12414e-06	0.000285949	CsaV3_6G049050/CsaV3_3G010470/CsaV3_7G022930/CsaV3_6G040390/CsaV3_2G013320/CsaV3_5G036470/CsaV3_6G040340/CsaV3_2G001570/CsaV3_7G031080/CsaV3_6G048080/CsaV3_3G023460/CsaV3_5G034810/CsaV3_7G021470/CsaV3_3G007170/CsaV3_4G004200/CsaV3_3G021780/CsaV3_4G037690/CsaV3_1G005960/CsaV3_2G028640/CsaV3_6G040430/CsaV3_5G028690/CsaV3_1G046070/CsaV3_6G048680/CsaV3_4G008960	CsaV3_6G049050/CsaV3_3G010470/CsaV3_7G022930/CsaV3_6G040390/CsaV3_2G013320/CsaV3_5G036470/CsaV3_6G040340/CsaV3_2G001570/CsaV3_7G031080/CsaV3_6G048080/CsaV3_3G023460/CsaV3_5G034810/CsaV3_7G021470/CsaV3_3G007170/CsaV3_4G004200/CsaV3_3G021780/CsaV3_4G037690/CsaV3_1G005960/CsaV3_2G028640/CsaV3_6G040430/CsaV3_5G028690/CsaV3_1G046070/CsaV3_6G048680/CsaV3_4G008960	24	19	CsaV3_6G049050/CsaV3_3G010470/CsaV3_7G022930/CsaV3_6G040390/CsaV3_2G013320/CsaV3_5G036470/CsaV3_6G040340/CsaV3_2G001570/CsaV3_7G031080/CsaV3_5G034810/CsaV3_3G007170/CsaV3_3G021780/CsaV3_4G037690/CsaV3_1G005960/CsaV3_2G028640/CsaV3_6G040430/CsaV3_5G028690/CsaV3_1G046070/CsaV3_6G048680	5	CsaV3_6G048080/CsaV3_3G023460/CsaV3_7G021470/CsaV3_4G004200/CsaV3_4G008960
BP	GO:0009145	purine nucleoside triphosphate biosynthetic process	24/1218	47/5833	4.12414e-06	0.000285949	CsaV3_6G049050/CsaV3_3G010470/CsaV3_7G022930/CsaV3_6G040390/CsaV3_2G013320/CsaV3_5G036470/CsaV3_6G040340/CsaV3_2G001570/CsaV3_7G031080/CsaV3_6G048080/CsaV3_3G023460/CsaV3_5G034810/CsaV3_7G021470/CsaV3_3G007170/CsaV3_4G004200/CsaV3_3G021780/CsaV3_4G037690/CsaV3_1G005960/CsaV3_2G028640/CsaV3_6G040430/CsaV3_5G028690/CsaV3_1G046070/CsaV3_6G048680/CsaV3_4G008960	CsaV3_6G049050/CsaV3_3G010470/CsaV3_7G022930/CsaV3_6G040390/CsaV3_2G013320/CsaV3_5G036470/CsaV3_6G040340/CsaV3_2G001570/CsaV3_7G031080/CsaV3_6G048080/CsaV3_3G023460/CsaV3_5G034810/CsaV3_7G021470/CsaV3_3G007170/CsaV3_4G004200/CsaV3_3G021780/CsaV3_4G037690/CsaV3_1G005960/CsaV3_2G028640/CsaV3_6G040430/CsaV3_5G028690/CsaV3_1G046070/CsaV3_6G048680/CsaV3_4G008960	24	19	CsaV3_6G049050/CsaV3_3G010470/CsaV3_7G022930/CsaV3_6G040390/CsaV3_2G013320/CsaV3_5G036470/CsaV3_6G040340/CsaV3_2G001570/CsaV3_7G031080/CsaV3_5G034810/CsaV3_3G007170/CsaV3_3G021780/CsaV3_4G037690/CsaV3_1G005960/CsaV3_2G028640/CsaV3_6G040430/CsaV3_5G028690/CsaV3_1G046070/CsaV3_6G048680	5	CsaV3_6G048080/CsaV3_3G023460/CsaV3_7G021470/CsaV3_4G004200/CsaV3_4G008960
BP	GO:0009201	ribonucleoside triphosphate biosynthetic process	24/1218	47/5833	4.12414e-06	0.000285949	CsaV3_6G049050/CsaV3_3G010470/CsaV3_7G022930/CsaV3_6G040390/CsaV3_2G013320/CsaV3_5G036470/CsaV3_6G040340/CsaV3_2G001570/CsaV3_7G031080/CsaV3_6G048080/CsaV3_3G023460/CsaV3_5G034810/CsaV3_7G021470/CsaV3_3G007170/CsaV3_4G004200/CsaV3_3G021780/CsaV3_4G037690/CsaV3_1G005960/CsaV3_2G028640/CsaV3_6G040430/CsaV3_5G028690/CsaV3_1G046070/CsaV3_6G048680/CsaV3_4G008960	CsaV3_6G049050/CsaV3_3G010470/CsaV3_7G022930/CsaV3_6G040390/CsaV3_2G013320/CsaV3_5G036470/CsaV3_6G040340/CsaV3_2G001570/CsaV3_7G031080/CsaV3_6G048080/CsaV3_3G023460/CsaV3_5G034810/CsaV3_7G021470/CsaV3_3G007170/CsaV3_4G004200/CsaV3_3G021780/CsaV3_4G037690/CsaV3_1G005960/CsaV3_2G028640/CsaV3_6G040430/CsaV3_5G028690/CsaV3_1G046070/CsaV3_6G048680/CsaV3_4G008960	24	19	CsaV3_6G049050/CsaV3_3G010470/CsaV3_7G022930/CsaV3_6G040390/CsaV3_2G013320/CsaV3_5G036470/CsaV3_6G040340/CsaV3_2G001570/CsaV3_7G031080/CsaV3_5G034810/CsaV3_3G007170/CsaV3_3G021780/CsaV3_4G037690/CsaV3_1G005960/CsaV3_2G028640/CsaV3_6G040430/CsaV3_5G028690/CsaV3_1G046070/CsaV3_6G048680	5	CsaV3_6G048080/CsaV3_3G023460/CsaV3_7G021470/CsaV3_4G004200/CsaV3_4G008960
BP	GO:0009206	purine ribonucleoside triphosphate biosynthetic process	24/1218	47/5833	4.12414e-06	0.000285949	CsaV3_6G049050/CsaV3_3G010470/CsaV3_7G022930/CsaV3_6G040390/CsaV3_2G013320/CsaV3_5G036470/CsaV3_6G040340/CsaV3_2G001570/CsaV3_7G031080/CsaV3_6G048080/CsaV3_3G023460/CsaV3_5G034810/CsaV3_7G021470/CsaV3_3G007170/CsaV3_4G004200/CsaV3_3G021780/CsaV3_4G037690/CsaV3_1G005960/CsaV3_2G028640/CsaV3_6G040430/CsaV3_5G028690/CsaV3_1G046070/CsaV3_6G048680/CsaV3_4G008960	CsaV3_6G049050/CsaV3_3G010470/CsaV3_7G022930/CsaV3_6G040390/CsaV3_2G013320/CsaV3_5G036470/CsaV3_6G040340/CsaV3_2G001570/CsaV3_7G031080/CsaV3_6G048080/CsaV3_3G023460/CsaV3_5G034810/CsaV3_7G021470/CsaV3_3G007170/CsaV3_4G004200/CsaV3_3G021780/CsaV3_4G037690/CsaV3_1G005960/CsaV3_2G028640/CsaV3_6G040430/CsaV3_5G028690/CsaV3_1G046070/CsaV3_6G048680/CsaV3_4G008960	24	19	CsaV3_6G049050/CsaV3_3G010470/CsaV3_7G022930/CsaV3_6G040390/CsaV3_2G013320/CsaV3_5G036470/CsaV3_6G040340/CsaV3_2G001570/CsaV3_7G031080/CsaV3_5G034810/CsaV3_3G007170/CsaV3_3G021780/CsaV3_4G037690/CsaV3_1G005960/CsaV3_2G028640/CsaV3_6G040430/CsaV3_5G028690/CsaV3_1G046070/CsaV3_6G048680	5	CsaV3_6G048080/CsaV3_3G023460/CsaV3_7G021470/CsaV3_4G004200/CsaV3_4G008960
BP	GO:0016052	carbohydrate catabolic process	21/1218	39/5833	5.56592e-06	0.000285949	CsaV3_7G022930/CsaV3_6G040390/CsaV3_2G013320/CsaV3_6G040340/CsaV3_3G002150/CsaV3_6G048080/CsaV3_3G023460/CsaV3_3G011520/CsaV3_4G013550/CsaV3_7G021470/CsaV3_4G004200/CsaV3_2G012230/CsaV3_3G021780/CsaV3_4G037690/CsaV3_2G028640/CsaV3_4G007080/CsaV3_6G040430/CsaV3_5G028690/CsaV3_1G046070/CsaV3_6G048680/CsaV3_4G008960	CsaV3_7G022930/CsaV3_6G040390/CsaV3_2G013320/CsaV3_6G040340/CsaV3_3G002150/CsaV3_6G048080/CsaV3_3G023460/CsaV3_3G011520/CsaV3_4G013550/CsaV3_7G021470/CsaV3_4G004200/CsaV3_2G012230/CsaV3_3G021780/CsaV3_4G037690/CsaV3_2G028640/CsaV3_4G007080/CsaV3_6G040430/CsaV3_5G028690/CsaV3_1G046070/CsaV3_6G048680/CsaV3_4G008960	21	14	CsaV3_7G022930/CsaV3_6G040390/CsaV3_2G013320/CsaV3_6G040340/CsaV3_3G002150/CsaV3_4G013550/CsaV3_3G021780/CsaV3_4G037690/CsaV3_2G028640/CsaV3_4G007080/CsaV3_6G040430/CsaV3_5G028690/CsaV3_1G046070/CsaV3_6G048680	7	CsaV3_6G048080/CsaV3_3G023460/CsaV3_3G011520/CsaV3_7G021470/CsaV3_4G004200/CsaV3_2G012230/CsaV3_4G008960
BP	GO:0019362	pyridine nucleotide metabolic process	21/1218	39/5833	5.56592e-06	0.000285949	CsaV3_7G022930/CsaV3_6G040390/CsaV3_2G013320/CsaV3_5G034910/CsaV3_6G040340/CsaV3_2G004240/CsaV3_6G048080/CsaV3_3G023460/CsaV3_5G028490/CsaV3_5G038830/CsaV3_7G021470/CsaV3_4G004200/CsaV3_3G021780/CsaV3_4G037690/CsaV3_2G028640/CsaV3_6G040430/CsaV3_1G037750/CsaV3_5G028690/CsaV3_1G046070/CsaV3_6G048680/CsaV3_4G008960	CsaV3_7G022930/CsaV3_6G040390/CsaV3_2G013320/CsaV3_5G034910/CsaV3_6G040340/CsaV3_2G004240/CsaV3_6G048080/CsaV3_3G023460/CsaV3_5G028490/CsaV3_5G038830/CsaV3_7G021470/CsaV3_4G004200/CsaV3_3G021780/CsaV3_4G037690/CsaV3_2G028640/CsaV3_6G040430/CsaV3_1G037750/CsaV3_5G028690/CsaV3_1G046070/CsaV3_6G048680/CsaV3_4G008960	21	15	CsaV3_7G022930/CsaV3_6G040390/CsaV3_2G013320/CsaV3_6G040340/CsaV3_2G004240/CsaV3_5G028490/CsaV3_5G038830/CsaV3_3G021780/CsaV3_4G037690/CsaV3_2G028640/CsaV3_6G040430/CsaV3_1G037750/CsaV3_5G028690/CsaV3_1G046070/CsaV3_6G048680	6	CsaV3_5G034910/CsaV3_6G048080/CsaV3_3G023460/CsaV3_7G021470/CsaV3_4G004200/CsaV3_4G008960
BP	GO:0046496	nicotinamide nucleotide metabolic process	21/1218	39/5833	5.56592e-06	0.000285949	CsaV3_7G022930/CsaV3_6G040390/CsaV3_2G013320/CsaV3_5G034910/CsaV3_6G040340/CsaV3_2G004240/CsaV3_6G048080/CsaV3_3G023460/CsaV3_5G028490/CsaV3_5G038830/CsaV3_7G021470/CsaV3_4G004200/CsaV3_3G021780/CsaV3_4G037690/CsaV3_2G028640/CsaV3_6G040430/CsaV3_1G037750/CsaV3_5G028690/CsaV3_1G046070/CsaV3_6G048680/CsaV3_4G008960	CsaV3_7G022930/CsaV3_6G040390/CsaV3_2G013320/CsaV3_5G034910/CsaV3_6G040340/CsaV3_2G004240/CsaV3_6G048080/CsaV3_3G023460/CsaV3_5G028490/CsaV3_5G038830/CsaV3_7G021470/CsaV3_4G004200/CsaV3_3G021780/CsaV3_4G037690/CsaV3_2G028640/CsaV3_6G040430/CsaV3_1G037750/CsaV3_5G028690/CsaV3_1G046070/CsaV3_6G048680/CsaV3_4G008960	21	15	CsaV3_7G022930/CsaV3_6G040390/CsaV3_2G013320/CsaV3_6G040340/CsaV3_2G004240/CsaV3_5G028490/CsaV3_5G038830/CsaV3_3G021780/CsaV3_4G037690/CsaV3_2G028640/CsaV3_6G040430/CsaV3_1G037750/CsaV3_5G028690/CsaV3_1G046070/CsaV3_6G048680	6	CsaV3_5G034910/CsaV3_6G048080/CsaV3_3G023460/CsaV3_7G021470/CsaV3_4G004200/CsaV3_4G008960
BP	GO:0006754	ATP biosynthetic process	23/1218	45/5833	6.4184e-06	0.000293107	CsaV3_6G049050/CsaV3_3G010470/CsaV3_7G022930/CsaV3_6G040390/CsaV3_2G013320/CsaV3_5G036470/CsaV3_6G040340/CsaV3_2G001570/CsaV3_7G031080/CsaV3_6G048080/CsaV3_3G023460/CsaV3_5G034810/CsaV3_7G021470/CsaV3_4G004200/CsaV3_3G021780/CsaV3_4G037690/CsaV3_1G005960/CsaV3_2G028640/CsaV3_6G040430/CsaV3_5G028690/CsaV3_1G046070/CsaV3_6G048680/CsaV3_4G008960	CsaV3_6G049050/CsaV3_3G010470/CsaV3_7G022930/CsaV3_6G040390/CsaV3_2G013320/CsaV3_5G036470/CsaV3_6G040340/CsaV3_2G001570/CsaV3_7G031080/CsaV3_6G048080/CsaV3_3G023460/CsaV3_5G034810/CsaV3_7G021470/CsaV3_4G004200/CsaV3_3G021780/CsaV3_4G037690/CsaV3_1G005960/CsaV3_2G028640/CsaV3_6G040430/CsaV3_5G028690/CsaV3_1G046070/CsaV3_6G048680/CsaV3_4G008960	23	18	CsaV3_6G049050/CsaV3_3G010470/CsaV3_7G022930/CsaV3_6G040390/CsaV3_2G013320/CsaV3_5G036470/CsaV3_6G040340/CsaV3_2G001570/CsaV3_7G031080/CsaV3_5G034810/CsaV3_3G021780/CsaV3_4G037690/CsaV3_1G005960/CsaV3_2G028640/CsaV3_6G040430/CsaV3_5G028690/CsaV3_1G046070/CsaV3_6G048680	5	CsaV3_6G048080/CsaV3_3G023460/CsaV3_7G021470/CsaV3_4G004200/CsaV3_4G008960
BP	GO:0006733	oxidoreduction coenzyme metabolic process	21/1218	40/5833	9.43256e-06	0.000318768	CsaV3_7G022930/CsaV3_6G040390/CsaV3_2G013320/CsaV3_5G034910/CsaV3_6G040340/CsaV3_2G004240/CsaV3_6G048080/CsaV3_3G023460/CsaV3_5G028490/CsaV3_5G038830/CsaV3_7G021470/CsaV3_4G004200/CsaV3_3G021780/CsaV3_4G037690/CsaV3_2G028640/CsaV3_6G040430/CsaV3_1G037750/CsaV3_5G028690/CsaV3_1G046070/CsaV3_6G048680/CsaV3_4G008960	CsaV3_7G022930/CsaV3_6G040390/CsaV3_2G013320/CsaV3_5G034910/CsaV3_6G040340/CsaV3_2G004240/CsaV3_6G048080/CsaV3_3G023460/CsaV3_5G028490/CsaV3_5G038830/CsaV3_7G021470/CsaV3_4G004200/CsaV3_3G021780/CsaV3_4G037690/CsaV3_2G028640/CsaV3_6G040430/CsaV3_1G037750/CsaV3_5G028690/CsaV3_1G046070/CsaV3_6G048680/CsaV3_4G008960	21	15	CsaV3_7G022930/CsaV3_6G040390/CsaV3_2G013320/CsaV3_6G040340/CsaV3_2G004240/CsaV3_5G028490/CsaV3_5G038830/CsaV3_3G021780/CsaV3_4G037690/CsaV3_2G028640/CsaV3_6G040430/CsaV3_1G037750/CsaV3_5G028690/CsaV3_1G046070/CsaV3_6G048680	6	CsaV3_5G034910/CsaV3_6G048080/CsaV3_3G023460/CsaV3_7G021470/CsaV3_4G004200/CsaV3_4G008960
BP	GO:0006165	nucleoside diphosphate phosphorylation	17/1218	29/5833	9.68942e-06	0.000318768	CsaV3_7G022930/CsaV3_6G040390/CsaV3_2G013320/CsaV3_6G040340/CsaV3_6G048080/CsaV3_3G023460/CsaV3_7G021470/CsaV3_3G007170/CsaV3_4G004200/CsaV3_3G021780/CsaV3_4G037690/CsaV3_2G028640/CsaV3_6G040430/CsaV3_5G028690/CsaV3_1G046070/CsaV3_6G048680/CsaV3_4G008960	CsaV3_7G022930/CsaV3_6G040390/CsaV3_2G013320/CsaV3_6G040340/CsaV3_6G048080/CsaV3_3G023460/CsaV3_7G021470/CsaV3_3G007170/CsaV3_4G004200/CsaV3_3G021780/CsaV3_4G037690/CsaV3_2G028640/CsaV3_6G040430/CsaV3_5G028690/CsaV3_1G046070/CsaV3_6G048680/CsaV3_4G008960	17	12	CsaV3_7G022930/CsaV3_6G040390/CsaV3_2G013320/CsaV3_6G040340/CsaV3_3G007170/CsaV3_3G021780/CsaV3_4G037690/CsaV3_2G028640/CsaV3_6G040430/CsaV3_5G028690/CsaV3_1G046070/CsaV3_6G048680	5	CsaV3_6G048080/CsaV3_3G023460/CsaV3_7G021470/CsaV3_4G004200/CsaV3_4G008960
BP	GO:0046939	nucleotide phosphorylation	17/1218	29/5833	9.68942e-06	0.000318768	CsaV3_7G022930/CsaV3_6G040390/CsaV3_2G013320/CsaV3_6G040340/CsaV3_6G048080/CsaV3_3G023460/CsaV3_7G021470/CsaV3_3G007170/CsaV3_4G004200/CsaV3_3G021780/CsaV3_4G037690/CsaV3_2G028640/CsaV3_6G040430/CsaV3_5G028690/CsaV3_1G046070/CsaV3_6G048680/CsaV3_4G008960	CsaV3_7G022930/CsaV3_6G040390/CsaV3_2G013320/CsaV3_6G040340/CsaV3_6G048080/CsaV3_3G023460/CsaV3_7G021470/CsaV3_3G007170/CsaV3_4G004200/CsaV3_3G021780/CsaV3_4G037690/CsaV3_2G028640/CsaV3_6G040430/CsaV3_5G028690/CsaV3_1G046070/CsaV3_6G048680/CsaV3_4G008960	17	12	CsaV3_7G022930/CsaV3_6G040390/CsaV3_2G013320/CsaV3_6G040340/CsaV3_3G007170/CsaV3_3G021780/CsaV3_4G037690/CsaV3_2G028640/CsaV3_6G040430/CsaV3_5G028690/CsaV3_1G046070/CsaV3_6G048680	5	CsaV3_6G048080/CsaV3_3G023460/CsaV3_7G021470/CsaV3_4G004200/CsaV3_4G008960
BP	GO:0006096	glycolytic process	16/1218	27/5833	1.47362e-05	0.000318768	CsaV3_7G022930/CsaV3_6G040390/CsaV3_2G013320/CsaV3_6G040340/CsaV3_6G048080/CsaV3_3G023460/CsaV3_7G021470/CsaV3_4G004200/CsaV3_3G021780/CsaV3_4G037690/CsaV3_2G028640/CsaV3_6G040430/CsaV3_5G028690/CsaV3_1G046070/CsaV3_6G048680/CsaV3_4G008960	CsaV3_7G022930/CsaV3_6G040390/CsaV3_2G013320/CsaV3_6G040340/CsaV3_6G048080/CsaV3_3G023460/CsaV3_7G021470/CsaV3_4G004200/CsaV3_3G021780/CsaV3_4G037690/CsaV3_2G028640/CsaV3_6G040430/CsaV3_5G028690/CsaV3_1G046070/CsaV3_6G048680/CsaV3_4G008960	16	11	CsaV3_7G022930/CsaV3_6G040390/CsaV3_2G013320/CsaV3_6G040340/CsaV3_3G021780/CsaV3_4G037690/CsaV3_2G028640/CsaV3_6G040430/CsaV3_5G028690/CsaV3_1G046070/CsaV3_6G048680	5	CsaV3_6G048080/CsaV3_3G023460/CsaV3_7G021470/CsaV3_4G004200/CsaV3_4G008960
BP	GO:0006757	ATP generation from ADP	16/1218	27/5833	1.47362e-05	0.000318768	CsaV3_7G022930/CsaV3_6G040390/CsaV3_2G013320/CsaV3_6G040340/CsaV3_6G048080/CsaV3_3G023460/CsaV3_7G021470/CsaV3_4G004200/CsaV3_3G021780/CsaV3_4G037690/CsaV3_2G028640/CsaV3_6G040430/CsaV3_5G028690/CsaV3_1G046070/CsaV3_6G048680/CsaV3_4G008960	CsaV3_7G022930/CsaV3_6G040390/CsaV3_2G013320/CsaV3_6G040340/CsaV3_6G048080/CsaV3_3G023460/CsaV3_7G021470/CsaV3_4G004200/CsaV3_3G021780/CsaV3_4G037690/CsaV3_2G028640/CsaV3_6G040430/CsaV3_5G028690/CsaV3_1G046070/CsaV3_6G048680/CsaV3_4G008960	16	11	CsaV3_7G022930/CsaV3_6G040390/CsaV3_2G013320/CsaV3_6G040340/CsaV3_3G021780/CsaV3_4G037690/CsaV3_2G028640/CsaV3_6G040430/CsaV3_5G028690/CsaV3_1G046070/CsaV3_6G048680	5	CsaV3_6G048080/CsaV3_3G023460/CsaV3_7G021470/CsaV3_4G004200/CsaV3_4G008960
BP	GO:0009135	purine nucleoside diphosphate metabolic process	16/1218	27/5833	1.47362e-05	0.000318768	CsaV3_7G022930/CsaV3_6G040390/CsaV3_2G013320/CsaV3_6G040340/CsaV3_6G048080/CsaV3_3G023460/CsaV3_7G021470/CsaV3_4G004200/CsaV3_3G021780/CsaV3_4G037690/CsaV3_2G028640/CsaV3_6G040430/CsaV3_5G028690/CsaV3_1G046070/CsaV3_6G048680/CsaV3_4G008960	CsaV3_7G022930/CsaV3_6G040390/CsaV3_2G013320/CsaV3_6G040340/CsaV3_6G048080/CsaV3_3G023460/CsaV3_7G021470/CsaV3_4G004200/CsaV3_3G021780/CsaV3_4G037690/CsaV3_2G028640/CsaV3_6G040430/CsaV3_5G028690/CsaV3_1G046070/CsaV3_6G048680/CsaV3_4G008960	16	11	CsaV3_7G022930/CsaV3_6G040390/CsaV3_2G013320/CsaV3_6G040340/CsaV3_3G021780/CsaV3_4G037690/CsaV3_2G028640/CsaV3_6G040430/CsaV3_5G028690/CsaV3_1G046070/CsaV3_6G048680	5	CsaV3_6G048080/CsaV3_3G023460/CsaV3_7G021470/CsaV3_4G004200/CsaV3_4G008960
BP	GO:0009179	purine ribonucleoside diphosphate metabolic process	16/1218	27/5833	1.47362e-05	0.000318768	CsaV3_7G022930/CsaV3_6G040390/CsaV3_2G013320/CsaV3_6G040340/CsaV3_6G048080/CsaV3_3G023460/CsaV3_7G021470/CsaV3_4G004200/CsaV3_3G021780/CsaV3_4G037690/CsaV3_2G028640/CsaV3_6G040430/CsaV3_5G028690/CsaV3_1G046070/CsaV3_6G048680/CsaV3_4G008960	CsaV3_7G022930/CsaV3_6G040390/CsaV3_2G013320/CsaV3_6G040340/CsaV3_6G048080/CsaV3_3G023460/CsaV3_7G021470/CsaV3_4G004200/CsaV3_3G021780/CsaV3_4G037690/CsaV3_2G028640/CsaV3_6G040430/CsaV3_5G028690/CsaV3_1G046070/CsaV3_6G048680/CsaV3_4G008960	16	11	CsaV3_7G022930/CsaV3_6G040390/CsaV3_2G013320/CsaV3_6G040340/CsaV3_3G021780/CsaV3_4G037690/CsaV3_2G028640/CsaV3_6G040430/CsaV3_5G028690/CsaV3_1G046070/CsaV3_6G048680	5	CsaV3_6G048080/CsaV3_3G023460/CsaV3_7G021470/CsaV3_4G004200/CsaV3_4G008960
BP	GO:0009185	ribonucleoside diphosphate metabolic process	16/1218	27/5833	1.47362e-05	0.000318768	CsaV3_7G022930/CsaV3_6G040390/CsaV3_2G013320/CsaV3_6G040340/CsaV3_6G048080/CsaV3_3G023460/CsaV3_7G021470/CsaV3_4G004200/CsaV3_3G021780/CsaV3_4G037690/CsaV3_2G028640/CsaV3_6G040430/CsaV3_5G028690/CsaV3_1G046070/CsaV3_6G048680/CsaV3_4G008960	CsaV3_7G022930/CsaV3_6G040390/CsaV3_2G013320/CsaV3_6G040340/CsaV3_6G048080/CsaV3_3G023460/CsaV3_7G021470/CsaV3_4G004200/CsaV3_3G021780/CsaV3_4G037690/CsaV3_2G028640/CsaV3_6G040430/CsaV3_5G028690/CsaV3_1G046070/CsaV3_6G048680/CsaV3_4G008960	16	11	CsaV3_7G022930/CsaV3_6G040390/CsaV3_2G013320/CsaV3_6G040340/CsaV3_3G021780/CsaV3_4G037690/CsaV3_2G028640/CsaV3_6G040430/CsaV3_5G028690/CsaV3_1G046070/CsaV3_6G048680	5	CsaV3_6G048080/CsaV3_3G023460/CsaV3_7G021470/CsaV3_4G004200/CsaV3_4G008960
BP	GO:0042866	pyruvate biosynthetic process	16/1218	27/5833	1.47362e-05	0.000318768	CsaV3_7G022930/CsaV3_6G040390/CsaV3_2G013320/CsaV3_6G040340/CsaV3_6G048080/CsaV3_3G023460/CsaV3_7G021470/CsaV3_4G004200/CsaV3_3G021780/CsaV3_4G037690/CsaV3_2G028640/CsaV3_6G040430/CsaV3_5G028690/CsaV3_1G046070/CsaV3_6G048680/CsaV3_4G008960	CsaV3_7G022930/CsaV3_6G040390/CsaV3_2G013320/CsaV3_6G040340/CsaV3_6G048080/CsaV3_3G023460/CsaV3_7G021470/CsaV3_4G004200/CsaV3_3G021780/CsaV3_4G037690/CsaV3_2G028640/CsaV3_6G040430/CsaV3_5G028690/CsaV3_1G046070/CsaV3_6G048680/CsaV3_4G008960	16	11	CsaV3_7G022930/CsaV3_6G040390/CsaV3_2G013320/CsaV3_6G040340/CsaV3_3G021780/CsaV3_4G037690/CsaV3_2G028640/CsaV3_6G040430/CsaV3_5G028690/CsaV3_1G046070/CsaV3_6G048680	5	CsaV3_6G048080/CsaV3_3G023460/CsaV3_7G021470/CsaV3_4G004200/CsaV3_4G008960
BP	GO:0046031	ADP metabolic process	16/1218	27/5833	1.47362e-05	0.000318768	CsaV3_7G022930/CsaV3_6G040390/CsaV3_2G013320/CsaV3_6G040340/CsaV3_6G048080/CsaV3_3G023460/CsaV3_7G021470/CsaV3_4G004200/CsaV3_3G021780/CsaV3_4G037690/CsaV3_2G028640/CsaV3_6G040430/CsaV3_5G028690/CsaV3_1G046070/CsaV3_6G048680/CsaV3_4G008960	CsaV3_7G022930/CsaV3_6G040390/CsaV3_2G013320/CsaV3_6G040340/CsaV3_6G048080/CsaV3_3G023460/CsaV3_7G021470/CsaV3_4G004200/CsaV3_3G021780/CsaV3_4G037690/CsaV3_2G028640/CsaV3_6G040430/CsaV3_5G028690/CsaV3_1G046070/CsaV3_6G048680/CsaV3_4G008960	16	11	CsaV3_7G022930/CsaV3_6G040390/CsaV3_2G013320/CsaV3_6G040340/CsaV3_3G021780/CsaV3_4G037690/CsaV3_2G028640/CsaV3_6G040430/CsaV3_5G028690/CsaV3_1G046070/CsaV3_6G048680	5	CsaV3_6G048080/CsaV3_3G023460/CsaV3_7G021470/CsaV3_4G004200/CsaV3_4G008960
BP	GO:0009132	nucleoside diphosphate metabolic process	17/1218	30/5833	1.80358e-05	0.000370636	CsaV3_7G022930/CsaV3_6G040390/CsaV3_2G013320/CsaV3_6G040340/CsaV3_6G048080/CsaV3_3G023460/CsaV3_7G021470/CsaV3_3G007170/CsaV3_4G004200/CsaV3_3G021780/CsaV3_4G037690/CsaV3_2G028640/CsaV3_6G040430/CsaV3_5G028690/CsaV3_1G046070/CsaV3_6G048680/CsaV3_4G008960	CsaV3_7G022930/CsaV3_6G040390/CsaV3_2G013320/CsaV3_6G040340/CsaV3_6G048080/CsaV3_3G023460/CsaV3_7G021470/CsaV3_3G007170/CsaV3_4G004200/CsaV3_3G021780/CsaV3_4G037690/CsaV3_2G028640/CsaV3_6G040430/CsaV3_5G028690/CsaV3_1G046070/CsaV3_6G048680/CsaV3_4G008960	17	12	CsaV3_7G022930/CsaV3_6G040390/CsaV3_2G013320/CsaV3_6G040340/CsaV3_3G007170/CsaV3_3G021780/CsaV3_4G037690/CsaV3_2G028640/CsaV3_6G040430/CsaV3_5G028690/CsaV3_1G046070/CsaV3_6G048680	5	CsaV3_6G048080/CsaV3_3G023460/CsaV3_7G021470/CsaV3_4G004200/CsaV3_4G008960
BP	GO:0009127	purine nucleoside monophosphate biosynthetic process	23/1218	48/5833	2.51381e-05	0.000449207	CsaV3_6G049050/CsaV3_3G010470/CsaV3_7G022930/CsaV3_6G040390/CsaV3_2G013320/CsaV3_5G036470/CsaV3_6G040340/CsaV3_2G001570/CsaV3_7G031080/CsaV3_6G048080/CsaV3_3G023460/CsaV3_5G034810/CsaV3_7G021470/CsaV3_4G004200/CsaV3_3G021780/CsaV3_4G037690/CsaV3_1G005960/CsaV3_2G028640/CsaV3_6G040430/CsaV3_5G028690/CsaV3_1G046070/CsaV3_6G048680/CsaV3_4G008960	CsaV3_6G049050/CsaV3_3G010470/CsaV3_7G022930/CsaV3_6G040390/CsaV3_2G013320/CsaV3_5G036470/CsaV3_6G040340/CsaV3_2G001570/CsaV3_7G031080/CsaV3_6G048080/CsaV3_3G023460/CsaV3_5G034810/CsaV3_7G021470/CsaV3_4G004200/CsaV3_3G021780/CsaV3_4G037690/CsaV3_1G005960/CsaV3_2G028640/CsaV3_6G040430/CsaV3_5G028690/CsaV3_1G046070/CsaV3_6G048680/CsaV3_4G008960	23	18	CsaV3_6G049050/CsaV3_3G010470/CsaV3_7G022930/CsaV3_6G040390/CsaV3_2G013320/CsaV3_5G036470/CsaV3_6G040340/CsaV3_2G001570/CsaV3_7G031080/CsaV3_5G034810/CsaV3_3G021780/CsaV3_4G037690/CsaV3_1G005960/CsaV3_2G028640/CsaV3_6G040430/CsaV3_5G028690/CsaV3_1G046070/CsaV3_6G048680	5	CsaV3_6G048080/CsaV3_3G023460/CsaV3_7G021470/CsaV3_4G004200/CsaV3_4G008960
BP	GO:0009156	ribonucleoside monophosphate biosynthetic process	23/1218	48/5833	2.51381e-05	0.000449207	CsaV3_6G049050/CsaV3_3G010470/CsaV3_7G022930/CsaV3_6G040390/CsaV3_2G013320/CsaV3_5G036470/CsaV3_6G040340/CsaV3_2G001570/CsaV3_7G031080/CsaV3_6G048080/CsaV3_3G023460/CsaV3_5G034810/CsaV3_7G021470/CsaV3_4G004200/CsaV3_3G021780/CsaV3_4G037690/CsaV3_1G005960/CsaV3_2G028640/CsaV3_6G040430/CsaV3_5G028690/CsaV3_1G046070/CsaV3_6G048680/CsaV3_4G008960	CsaV3_6G049050/CsaV3_3G010470/CsaV3_7G022930/CsaV3_6G040390/CsaV3_2G013320/CsaV3_5G036470/CsaV3_6G040340/CsaV3_2G001570/CsaV3_7G031080/CsaV3_6G048080/CsaV3_3G023460/CsaV3_5G034810/CsaV3_7G021470/CsaV3_4G004200/CsaV3_3G021780/CsaV3_4G037690/CsaV3_1G005960/CsaV3_2G028640/CsaV3_6G040430/CsaV3_5G028690/CsaV3_1G046070/CsaV3_6G048680/CsaV3_4G008960	23	18	CsaV3_6G049050/CsaV3_3G010470/CsaV3_7G022930/CsaV3_6G040390/CsaV3_2G013320/CsaV3_5G036470/CsaV3_6G040340/CsaV3_2G001570/CsaV3_7G031080/CsaV3_5G034810/CsaV3_3G021780/CsaV3_4G037690/CsaV3_1G005960/CsaV3_2G028640/CsaV3_6G040430/CsaV3_5G028690/CsaV3_1G046070/CsaV3_6G048680	5	CsaV3_6G048080/CsaV3_3G023460/CsaV3_7G021470/CsaV3_4G004200/CsaV3_4G008960
BP	GO:0009168	purine ribonucleoside monophosphate biosynthetic process	23/1218	48/5833	2.51381e-05	0.000449207	CsaV3_6G049050/CsaV3_3G010470/CsaV3_7G022930/CsaV3_6G040390/CsaV3_2G013320/CsaV3_5G036470/CsaV3_6G040340/CsaV3_2G001570/CsaV3_7G031080/CsaV3_6G048080/CsaV3_3G023460/CsaV3_5G034810/CsaV3_7G021470/CsaV3_4G004200/CsaV3_3G021780/CsaV3_4G037690/CsaV3_1G005960/CsaV3_2G028640/CsaV3_6G040430/CsaV3_5G028690/CsaV3_1G046070/CsaV3_6G048680/CsaV3_4G008960	CsaV3_6G049050/CsaV3_3G010470/CsaV3_7G022930/CsaV3_6G040390/CsaV3_2G013320/CsaV3_5G036470/CsaV3_6G040340/CsaV3_2G001570/CsaV3_7G031080/CsaV3_6G048080/CsaV3_3G023460/CsaV3_5G034810/CsaV3_7G021470/CsaV3_4G004200/CsaV3_3G021780/CsaV3_4G037690/CsaV3_1G005960/CsaV3_2G028640/CsaV3_6G040430/CsaV3_5G028690/CsaV3_1G046070/CsaV3_6G048680/CsaV3_4G008960	23	18	CsaV3_6G049050/CsaV3_3G010470/CsaV3_7G022930/CsaV3_6G040390/CsaV3_2G013320/CsaV3_5G036470/CsaV3_6G040340/CsaV3_2G001570/CsaV3_7G031080/CsaV3_5G034810/CsaV3_3G021780/CsaV3_4G037690/CsaV3_1G005960/CsaV3_2G028640/CsaV3_6G040430/CsaV3_5G028690/CsaV3_1G046070/CsaV3_6G048680	5	CsaV3_6G048080/CsaV3_3G023460/CsaV3_7G021470/CsaV3_4G004200/CsaV3_4G008960
BP	GO:0009166	nucleotide catabolic process	16/1218	28/5833	2.77556e-05	0.000456302	CsaV3_7G022930/CsaV3_6G040390/CsaV3_2G013320/CsaV3_6G040340/CsaV3_6G048080/CsaV3_3G023460/CsaV3_7G021470/CsaV3_4G004200/CsaV3_3G021780/CsaV3_4G037690/CsaV3_2G028640/CsaV3_6G040430/CsaV3_5G028690/CsaV3_1G046070/CsaV3_6G048680/CsaV3_4G008960	CsaV3_7G022930/CsaV3_6G040390/CsaV3_2G013320/CsaV3_6G040340/CsaV3_6G048080/CsaV3_3G023460/CsaV3_7G021470/CsaV3_4G004200/CsaV3_3G021780/CsaV3_4G037690/CsaV3_2G028640/CsaV3_6G040430/CsaV3_5G028690/CsaV3_1G046070/CsaV3_6G048680/CsaV3_4G008960	16	11	CsaV3_7G022930/CsaV3_6G040390/CsaV3_2G013320/CsaV3_6G040340/CsaV3_3G021780/CsaV3_4G037690/CsaV3_2G028640/CsaV3_6G040430/CsaV3_5G028690/CsaV3_1G046070/CsaV3_6G048680	5	CsaV3_6G048080/CsaV3_3G023460/CsaV3_7G021470/CsaV3_4G004200/CsaV3_4G008960
BP	GO:1901292	nucleoside phosphate catabolic process	16/1218	28/5833	2.77556e-05	0.000456302	CsaV3_7G022930/CsaV3_6G040390/CsaV3_2G013320/CsaV3_6G040340/CsaV3_6G048080/CsaV3_3G023460/CsaV3_7G021470/CsaV3_4G004200/CsaV3_3G021780/CsaV3_4G037690/CsaV3_2G028640/CsaV3_6G040430/CsaV3_5G028690/CsaV3_1G046070/CsaV3_6G048680/CsaV3_4G008960	CsaV3_7G022930/CsaV3_6G040390/CsaV3_2G013320/CsaV3_6G040340/CsaV3_6G048080/CsaV3_3G023460/CsaV3_7G021470/CsaV3_4G004200/CsaV3_3G021780/CsaV3_4G037690/CsaV3_2G028640/CsaV3_6G040430/CsaV3_5G028690/CsaV3_1G046070/CsaV3_6G048680/CsaV3_4G008960	16	11	CsaV3_7G022930/CsaV3_6G040390/CsaV3_2G013320/CsaV3_6G040340/CsaV3_3G021780/CsaV3_4G037690/CsaV3_2G028640/CsaV3_6G040430/CsaV3_5G028690/CsaV3_1G046070/CsaV3_6G048680	5	CsaV3_6G048080/CsaV3_3G023460/CsaV3_7G021470/CsaV3_4G004200/CsaV3_4G008960
BP	GO:0046434	organophosphate catabolic process	17/1218	31/5833	3.22194e-05	0.00047485	CsaV3_7G022930/CsaV3_6G040390/CsaV3_2G013320/CsaV3_6G040340/CsaV3_5G024850/CsaV3_6G048080/CsaV3_3G023460/CsaV3_7G021470/CsaV3_4G004200/CsaV3_3G021780/CsaV3_4G037690/CsaV3_2G028640/CsaV3_6G040430/CsaV3_5G028690/CsaV3_1G046070/CsaV3_6G048680/CsaV3_4G008960	CsaV3_7G022930/CsaV3_6G040390/CsaV3_2G013320/CsaV3_6G040340/CsaV3_5G024850/CsaV3_6G048080/CsaV3_3G023460/CsaV3_7G021470/CsaV3_4G004200/CsaV3_3G021780/CsaV3_4G037690/CsaV3_2G028640/CsaV3_6G040430/CsaV3_5G028690/CsaV3_1G046070/CsaV3_6G048680/CsaV3_4G008960	17	11	CsaV3_7G022930/CsaV3_6G040390/CsaV3_2G013320/CsaV3_6G040340/CsaV3_3G021780/CsaV3_4G037690/CsaV3_2G028640/CsaV3_6G040430/CsaV3_5G028690/CsaV3_1G046070/CsaV3_6G048680	6	CsaV3_5G024850/CsaV3_6G048080/CsaV3_3G023460/CsaV3_7G021470/CsaV3_4G004200/CsaV3_4G008960
BP	GO:0006164	purine nucleotide biosynthetic process	25/1218	55/5833	3.49791e-05	0.00047485	CsaV3_6G049050/CsaV3_3G010470/CsaV3_7G022930/CsaV3_6G040390/CsaV3_2G013320/CsaV3_5G036470/CsaV3_6G040340/CsaV3_2G001570/CsaV3_7G031080/CsaV3_6G048080/CsaV3_3G023460/CsaV3_5G034810/CsaV3_7G021470/CsaV3_3G007170/CsaV3_4G004200/CsaV3_3G021780/CsaV3_4G037690/CsaV3_1G005960/CsaV3_2G028640/CsaV3_6G040430/CsaV3_5G028690/CsaV3_1G046070/CsaV3_1G010170/CsaV3_6G048680/CsaV3_4G008960	CsaV3_6G049050/CsaV3_3G010470/CsaV3_7G022930/CsaV3_6G040390/CsaV3_2G013320/CsaV3_5G036470/CsaV3_6G040340/CsaV3_2G001570/CsaV3_7G031080/CsaV3_6G048080/CsaV3_3G023460/CsaV3_5G034810/CsaV3_7G021470/CsaV3_3G007170/CsaV3_4G004200/CsaV3_3G021780/CsaV3_4G037690/CsaV3_1G005960/CsaV3_2G028640/CsaV3_6G040430/CsaV3_5G028690/CsaV3_1G046070/CsaV3_1G010170/CsaV3_6G048680/CsaV3_4G008960	25	20	CsaV3_6G049050/CsaV3_3G010470/CsaV3_7G022930/CsaV3_6G040390/CsaV3_2G013320/CsaV3_5G036470/CsaV3_6G040340/CsaV3_2G001570/CsaV3_7G031080/CsaV3_5G034810/CsaV3_3G007170/CsaV3_3G021780/CsaV3_4G037690/CsaV3_1G005960/CsaV3_2G028640/CsaV3_6G040430/CsaV3_5G028690/CsaV3_1G046070/CsaV3_1G010170/CsaV3_6G048680	5	CsaV3_6G048080/CsaV3_3G023460/CsaV3_7G021470/CsaV3_4G004200/CsaV3_4G008960
BP	GO:0009144	purine nucleoside triphosphate metabolic process	25/1218	55/5833	3.49791e-05	0.00047485	CsaV3_6G049050/CsaV3_3G010470/CsaV3_7G022930/CsaV3_6G040390/CsaV3_2G013320/CsaV3_5G036470/CsaV3_6G040340/CsaV3_2G001570/CsaV3_7G031080/CsaV3_6G048080/CsaV3_3G023460/CsaV3_5G034810/CsaV3_7G021470/CsaV3_3G007170/CsaV3_4G004200/CsaV3_3G021780/CsaV3_4G037690/CsaV3_1G005960/CsaV3_2G028640/CsaV3_6G040430/CsaV3_3G046570/CsaV3_5G028690/CsaV3_1G046070/CsaV3_6G048680/CsaV3_4G008960	CsaV3_6G049050/CsaV3_3G010470/CsaV3_7G022930/CsaV3_6G040390/CsaV3_2G013320/CsaV3_5G036470/CsaV3_6G040340/CsaV3_2G001570/CsaV3_7G031080/CsaV3_6G048080/CsaV3_3G023460/CsaV3_5G034810/CsaV3_7G021470/CsaV3_3G007170/CsaV3_4G004200/CsaV3_3G021780/CsaV3_4G037690/CsaV3_1G005960/CsaV3_2G028640/CsaV3_6G040430/CsaV3_3G046570/CsaV3_5G028690/CsaV3_1G046070/CsaV3_6G048680/CsaV3_4G008960	25	20	CsaV3_6G049050/CsaV3_3G010470/CsaV3_7G022930/CsaV3_6G040390/CsaV3_2G013320/CsaV3_5G036470/CsaV3_6G040340/CsaV3_2G001570/CsaV3_7G031080/CsaV3_5G034810/CsaV3_3G007170/CsaV3_3G021780/CsaV3_4G037690/CsaV3_1G005960/CsaV3_2G028640/CsaV3_6G040430/CsaV3_3G046570/CsaV3_5G028690/CsaV3_1G046070/CsaV3_6G048680	5	CsaV3_6G048080/CsaV3_3G023460/CsaV3_7G021470/CsaV3_4G004200/CsaV3_4G008960
BP	GO:0009199	ribonucleoside triphosphate metabolic process	25/1218	55/5833	3.49791e-05	0.00047485	CsaV3_6G049050/CsaV3_3G010470/CsaV3_7G022930/CsaV3_6G040390/CsaV3_2G013320/CsaV3_5G036470/CsaV3_6G040340/CsaV3_2G001570/CsaV3_7G031080/CsaV3_6G048080/CsaV3_3G023460/CsaV3_5G034810/CsaV3_7G021470/CsaV3_3G007170/CsaV3_4G004200/CsaV3_3G021780/CsaV3_4G037690/CsaV3_1G005960/CsaV3_2G028640/CsaV3_6G040430/CsaV3_3G046570/CsaV3_5G028690/CsaV3_1G046070/CsaV3_6G048680/CsaV3_4G008960	CsaV3_6G049050/CsaV3_3G010470/CsaV3_7G022930/CsaV3_6G040390/CsaV3_2G013320/CsaV3_5G036470/CsaV3_6G040340/CsaV3_2G001570/CsaV3_7G031080/CsaV3_6G048080/CsaV3_3G023460/CsaV3_5G034810/CsaV3_7G021470/CsaV3_3G007170/CsaV3_4G004200/CsaV3_3G021780/CsaV3_4G037690/CsaV3_1G005960/CsaV3_2G028640/CsaV3_6G040430/CsaV3_3G046570/CsaV3_5G028690/CsaV3_1G046070/CsaV3_6G048680/CsaV3_4G008960	25	20	CsaV3_6G049050/CsaV3_3G010470/CsaV3_7G022930/CsaV3_6G040390/CsaV3_2G013320/CsaV3_5G036470/CsaV3_6G040340/CsaV3_2G001570/CsaV3_7G031080/CsaV3_5G034810/CsaV3_3G007170/CsaV3_3G021780/CsaV3_4G037690/CsaV3_1G005960/CsaV3_2G028640/CsaV3_6G040430/CsaV3_3G046570/CsaV3_5G028690/CsaV3_1G046070/CsaV3_6G048680	5	CsaV3_6G048080/CsaV3_3G023460/CsaV3_7G021470/CsaV3_4G004200/CsaV3_4G008960
BP	GO:0009205	purine ribonucleoside triphosphate metabolic process	25/1218	55/5833	3.49791e-05	0.00047485	CsaV3_6G049050/CsaV3_3G010470/CsaV3_7G022930/CsaV3_6G040390/CsaV3_2G013320/CsaV3_5G036470/CsaV3_6G040340/CsaV3_2G001570/CsaV3_7G031080/CsaV3_6G048080/CsaV3_3G023460/CsaV3_5G034810/CsaV3_7G021470/CsaV3_3G007170/CsaV3_4G004200/CsaV3_3G021780/CsaV3_4G037690/CsaV3_1G005960/CsaV3_2G028640/CsaV3_6G040430/CsaV3_3G046570/CsaV3_5G028690/CsaV3_1G046070/CsaV3_6G048680/CsaV3_4G008960	CsaV3_6G049050/CsaV3_3G010470/CsaV3_7G022930/CsaV3_6G040390/CsaV3_2G013320/CsaV3_5G036470/CsaV3_6G040340/CsaV3_2G001570/CsaV3_7G031080/CsaV3_6G048080/CsaV3_3G023460/CsaV3_5G034810/CsaV3_7G021470/CsaV3_3G007170/CsaV3_4G004200/CsaV3_3G021780/CsaV3_4G037690/CsaV3_1G005960/CsaV3_2G028640/CsaV3_6G040430/CsaV3_3G046570/CsaV3_5G028690/CsaV3_1G046070/CsaV3_6G048680/CsaV3_4G008960	25	20	CsaV3_6G049050/CsaV3_3G010470/CsaV3_7G022930/CsaV3_6G040390/CsaV3_2G013320/CsaV3_5G036470/CsaV3_6G040340/CsaV3_2G001570/CsaV3_7G031080/CsaV3_5G034810/CsaV3_3G007170/CsaV3_3G021780/CsaV3_4G037690/CsaV3_1G005960/CsaV3_2G028640/CsaV3_6G040430/CsaV3_3G046570/CsaV3_5G028690/CsaV3_1G046070/CsaV3_6G048680	5	CsaV3_6G048080/CsaV3_3G023460/CsaV3_7G021470/CsaV3_4G004200/CsaV3_4G008960
BP	GO:0046034	ATP metabolic process	24/1218	52/5833	3.67157e-05	0.00047485	CsaV3_6G049050/CsaV3_3G010470/CsaV3_7G022930/CsaV3_6G040390/CsaV3_2G013320/CsaV3_5G036470/CsaV3_6G040340/CsaV3_2G001570/CsaV3_7G031080/CsaV3_6G048080/CsaV3_3G023460/CsaV3_5G034810/CsaV3_7G021470/CsaV3_4G004200/CsaV3_3G021780/CsaV3_4G037690/CsaV3_1G005960/CsaV3_2G028640/CsaV3_6G040430/CsaV3_3G046570/CsaV3_5G028690/CsaV3_1G046070/CsaV3_6G048680/CsaV3_4G008960	CsaV3_6G049050/CsaV3_3G010470/CsaV3_7G022930/CsaV3_6G040390/CsaV3_2G013320/CsaV3_5G036470/CsaV3_6G040340/CsaV3_2G001570/CsaV3_7G031080/CsaV3_6G048080/CsaV3_3G023460/CsaV3_5G034810/CsaV3_7G021470/CsaV3_4G004200/CsaV3_3G021780/CsaV3_4G037690/CsaV3_1G005960/CsaV3_2G028640/CsaV3_6G040430/CsaV3_3G046570/CsaV3_5G028690/CsaV3_1G046070/CsaV3_6G048680/CsaV3_4G008960	24	19	CsaV3_6G049050/CsaV3_3G010470/CsaV3_7G022930/CsaV3_6G040390/CsaV3_2G013320/CsaV3_5G036470/CsaV3_6G040340/CsaV3_2G001570/CsaV3_7G031080/CsaV3_5G034810/CsaV3_3G021780/CsaV3_4G037690/CsaV3_1G005960/CsaV3_2G028640/CsaV3_6G040430/CsaV3_3G046570/CsaV3_5G028690/CsaV3_1G046070/CsaV3_6G048680	5	CsaV3_6G048080/CsaV3_3G023460/CsaV3_7G021470/CsaV3_4G004200/CsaV3_4G008960
BP	GO:0006091	generation of precursor metabolites and energy	23/1218	49/5833	3.81266e-05	0.00047485	CsaV3_7G004300/CsaV3_7G022930/CsaV3_6G040390/CsaV3_2G013320/CsaV3_6G040340/CsaV3_6G048080/CsaV3_3G023460/CsaV3_5G028880/CsaV3_2G024700/CsaV3_7G021470/CsaV3_6G042680/CsaV3_4G004200/CsaV3_3G021780/CsaV3_4G037690/CsaV3_2G028640/CsaV3_6G040430/CsaV3_3G046570/CsaV3_5G028690/CsaV3_1G046070/CsaV3_6G048680/CsaV3_4G026390/CsaV3_1G025480/CsaV3_4G008960	CsaV3_7G004300/CsaV3_7G022930/CsaV3_6G040390/CsaV3_2G013320/CsaV3_6G040340/CsaV3_6G048080/CsaV3_3G023460/CsaV3_5G028880/CsaV3_2G024700/CsaV3_7G021470/CsaV3_6G042680/CsaV3_4G004200/CsaV3_3G021780/CsaV3_4G037690/CsaV3_2G028640/CsaV3_6G040430/CsaV3_3G046570/CsaV3_5G028690/CsaV3_1G046070/CsaV3_6G048680/CsaV3_4G026390/CsaV3_1G025480/CsaV3_4G008960	23	16	CsaV3_7G004300/CsaV3_7G022930/CsaV3_6G040390/CsaV3_2G013320/CsaV3_6G040340/CsaV3_5G028880/CsaV3_2G024700/CsaV3_6G042680/CsaV3_3G021780/CsaV3_4G037690/CsaV3_2G028640/CsaV3_6G040430/CsaV3_3G046570/CsaV3_5G028690/CsaV3_1G046070/CsaV3_6G048680	7	CsaV3_6G048080/CsaV3_3G023460/CsaV3_7G021470/CsaV3_4G004200/CsaV3_4G026390/CsaV3_1G025480/CsaV3_4G008960
BP	GO:0009124	nucleoside monophosphate biosynthetic process	23/1218	49/5833	3.81266e-05	0.00047485	CsaV3_6G049050/CsaV3_3G010470/CsaV3_7G022930/CsaV3_6G040390/CsaV3_2G013320/CsaV3_5G036470/CsaV3_6G040340/CsaV3_2G001570/CsaV3_7G031080/CsaV3_6G048080/CsaV3_3G023460/CsaV3_5G034810/CsaV3_7G021470/CsaV3_4G004200/CsaV3_3G021780/CsaV3_4G037690/CsaV3_1G005960/CsaV3_2G028640/CsaV3_6G040430/CsaV3_5G028690/CsaV3_1G046070/CsaV3_6G048680/CsaV3_4G008960	CsaV3_6G049050/CsaV3_3G010470/CsaV3_7G022930/CsaV3_6G040390/CsaV3_2G013320/CsaV3_5G036470/CsaV3_6G040340/CsaV3_2G001570/CsaV3_7G031080/CsaV3_6G048080/CsaV3_3G023460/CsaV3_5G034810/CsaV3_7G021470/CsaV3_4G004200/CsaV3_3G021780/CsaV3_4G037690/CsaV3_1G005960/CsaV3_2G028640/CsaV3_6G040430/CsaV3_5G028690/CsaV3_1G046070/CsaV3_6G048680/CsaV3_4G008960	23	18	CsaV3_6G049050/CsaV3_3G010470/CsaV3_7G022930/CsaV3_6G040390/CsaV3_2G013320/CsaV3_5G036470/CsaV3_6G040340/CsaV3_2G001570/CsaV3_7G031080/CsaV3_5G034810/CsaV3_3G021780/CsaV3_4G037690/CsaV3_1G005960/CsaV3_2G028640/CsaV3_6G040430/CsaV3_5G028690/CsaV3_1G046070/CsaV3_6G048680	5	CsaV3_6G048080/CsaV3_3G023460/CsaV3_7G021470/CsaV3_4G004200/CsaV3_4G008960
BP	GO:0006090	pyruvate metabolic process	16/1218	29/5833	4.99909e-05	0.000568983	CsaV3_7G022930/CsaV3_6G040390/CsaV3_2G013320/CsaV3_6G040340/CsaV3_6G048080/CsaV3_3G023460/CsaV3_7G021470/CsaV3_4G004200/CsaV3_3G021780/CsaV3_4G037690/CsaV3_2G028640/CsaV3_6G040430/CsaV3_5G028690/CsaV3_1G046070/CsaV3_6G048680/CsaV3_4G008960	CsaV3_7G022930/CsaV3_6G040390/CsaV3_2G013320/CsaV3_6G040340/CsaV3_6G048080/CsaV3_3G023460/CsaV3_7G021470/CsaV3_4G004200/CsaV3_3G021780/CsaV3_4G037690/CsaV3_2G028640/CsaV3_6G040430/CsaV3_5G028690/CsaV3_1G046070/CsaV3_6G048680/CsaV3_4G008960	16	11	CsaV3_7G022930/CsaV3_6G040390/CsaV3_2G013320/CsaV3_6G040340/CsaV3_3G021780/CsaV3_4G037690/CsaV3_2G028640/CsaV3_6G040430/CsaV3_5G028690/CsaV3_1G046070/CsaV3_6G048680	5	CsaV3_6G048080/CsaV3_3G023460/CsaV3_7G021470/CsaV3_4G004200/CsaV3_4G008960
BP	GO:0009141	nucleoside triphosphate metabolic process	25/1218	56/5833	5.08274e-05	0.000568983	CsaV3_6G049050/CsaV3_3G010470/CsaV3_7G022930/CsaV3_6G040390/CsaV3_2G013320/CsaV3_5G036470/CsaV3_6G040340/CsaV3_2G001570/CsaV3_7G031080/CsaV3_6G048080/CsaV3_3G023460/CsaV3_5G034810/CsaV3_7G021470/CsaV3_3G007170/CsaV3_4G004200/CsaV3_3G021780/CsaV3_4G037690/CsaV3_1G005960/CsaV3_2G028640/CsaV3_6G040430/CsaV3_3G046570/CsaV3_5G028690/CsaV3_1G046070/CsaV3_6G048680/CsaV3_4G008960	CsaV3_6G049050/CsaV3_3G010470/CsaV3_7G022930/CsaV3_6G040390/CsaV3_2G013320/CsaV3_5G036470/CsaV3_6G040340/CsaV3_2G001570/CsaV3_7G031080/CsaV3_6G048080/CsaV3_3G023460/CsaV3_5G034810/CsaV3_7G021470/CsaV3_3G007170/CsaV3_4G004200/CsaV3_3G021780/CsaV3_4G037690/CsaV3_1G005960/CsaV3_2G028640/CsaV3_6G040430/CsaV3_3G046570/CsaV3_5G028690/CsaV3_1G046070/CsaV3_6G048680/CsaV3_4G008960	25	20	CsaV3_6G049050/CsaV3_3G010470/CsaV3_7G022930/CsaV3_6G040390/CsaV3_2G013320/CsaV3_5G036470/CsaV3_6G040340/CsaV3_2G001570/CsaV3_7G031080/CsaV3_5G034810/CsaV3_3G007170/CsaV3_3G021780/CsaV3_4G037690/CsaV3_1G005960/CsaV3_2G028640/CsaV3_6G040430/CsaV3_3G046570/CsaV3_5G028690/CsaV3_1G046070/CsaV3_6G048680	5	CsaV3_6G048080/CsaV3_3G023460/CsaV3_7G021470/CsaV3_4G004200/CsaV3_4G008960
BP	GO:0072522	purine-containing compound biosynthetic process	25/1218	56/5833	5.08274e-05	0.000568983	CsaV3_6G049050/CsaV3_3G010470/CsaV3_7G022930/CsaV3_6G040390/CsaV3_2G013320/CsaV3_5G036470/CsaV3_6G040340/CsaV3_2G001570/CsaV3_7G031080/CsaV3_6G048080/CsaV3_3G023460/CsaV3_5G034810/CsaV3_7G021470/CsaV3_3G007170/CsaV3_4G004200/CsaV3_3G021780/CsaV3_4G037690/CsaV3_1G005960/CsaV3_2G028640/CsaV3_6G040430/CsaV3_5G028690/CsaV3_1G046070/CsaV3_1G010170/CsaV3_6G048680/CsaV3_4G008960	CsaV3_6G049050/CsaV3_3G010470/CsaV3_7G022930/CsaV3_6G040390/CsaV3_2G013320/CsaV3_5G036470/CsaV3_6G040340/CsaV3_2G001570/CsaV3_7G031080/CsaV3_6G048080/CsaV3_3G023460/CsaV3_5G034810/CsaV3_7G021470/CsaV3_3G007170/CsaV3_4G004200/CsaV3_3G021780/CsaV3_4G037690/CsaV3_1G005960/CsaV3_2G028640/CsaV3_6G040430/CsaV3_5G028690/CsaV3_1G046070/CsaV3_1G010170/CsaV3_6G048680/CsaV3_4G008960	25	20	CsaV3_6G049050/CsaV3_3G010470/CsaV3_7G022930/CsaV3_6G040390/CsaV3_2G013320/CsaV3_5G036470/CsaV3_6G040340/CsaV3_2G001570/CsaV3_7G031080/CsaV3_5G034810/CsaV3_3G007170/CsaV3_3G021780/CsaV3_4G037690/CsaV3_1G005960/CsaV3_2G028640/CsaV3_6G040430/CsaV3_5G028690/CsaV3_1G046070/CsaV3_1G010170/CsaV3_6G048680	5	CsaV3_6G048080/CsaV3_3G023460/CsaV3_7G021470/CsaV3_4G004200/CsaV3_4G008960
BP	GO:0009152	purine ribonucleotide biosynthetic process	24/1218	53/5833	5.39911e-05	0.000568983	CsaV3_6G049050/CsaV3_3G010470/CsaV3_7G022930/CsaV3_6G040390/CsaV3_2G013320/CsaV3_5G036470/CsaV3_6G040340/CsaV3_2G001570/CsaV3_7G031080/CsaV3_6G048080/CsaV3_3G023460/CsaV3_5G034810/CsaV3_7G021470/CsaV3_3G007170/CsaV3_4G004200/CsaV3_3G021780/CsaV3_4G037690/CsaV3_1G005960/CsaV3_2G028640/CsaV3_6G040430/CsaV3_5G028690/CsaV3_1G046070/CsaV3_6G048680/CsaV3_4G008960	CsaV3_6G049050/CsaV3_3G010470/CsaV3_7G022930/CsaV3_6G040390/CsaV3_2G013320/CsaV3_5G036470/CsaV3_6G040340/CsaV3_2G001570/CsaV3_7G031080/CsaV3_6G048080/CsaV3_3G023460/CsaV3_5G034810/CsaV3_7G021470/CsaV3_3G007170/CsaV3_4G004200/CsaV3_3G021780/CsaV3_4G037690/CsaV3_1G005960/CsaV3_2G028640/CsaV3_6G040430/CsaV3_5G028690/CsaV3_1G046070/CsaV3_6G048680/CsaV3_4G008960	24	19	CsaV3_6G049050/CsaV3_3G010470/CsaV3_7G022930/CsaV3_6G040390/CsaV3_2G013320/CsaV3_5G036470/CsaV3_6G040340/CsaV3_2G001570/CsaV3_7G031080/CsaV3_5G034810/CsaV3_3G007170/CsaV3_3G021780/CsaV3_4G037690/CsaV3_1G005960/CsaV3_2G028640/CsaV3_6G040430/CsaV3_5G028690/CsaV3_1G046070/CsaV3_6G048680	5	CsaV3_6G048080/CsaV3_3G023460/CsaV3_7G021470/CsaV3_4G004200/CsaV3_4G008960
BP	GO:0009260	ribonucleotide biosynthetic process	24/1218	53/5833	5.39911e-05	0.000568983	CsaV3_6G049050/CsaV3_3G010470/CsaV3_7G022930/CsaV3_6G040390/CsaV3_2G013320/CsaV3_5G036470/CsaV3_6G040340/CsaV3_2G001570/CsaV3_7G031080/CsaV3_6G048080/CsaV3_3G023460/CsaV3_5G034810/CsaV3_7G021470/CsaV3_3G007170/CsaV3_4G004200/CsaV3_3G021780/CsaV3_4G037690/CsaV3_1G005960/CsaV3_2G028640/CsaV3_6G040430/CsaV3_5G028690/CsaV3_1G046070/CsaV3_6G048680/CsaV3_4G008960	CsaV3_6G049050/CsaV3_3G010470/CsaV3_7G022930/CsaV3_6G040390/CsaV3_2G013320/CsaV3_5G036470/CsaV3_6G040340/CsaV3_2G001570/CsaV3_7G031080/CsaV3_6G048080/CsaV3_3G023460/CsaV3_5G034810/CsaV3_7G021470/CsaV3_3G007170/CsaV3_4G004200/CsaV3_3G021780/CsaV3_4G037690/CsaV3_1G005960/CsaV3_2G028640/CsaV3_6G040430/CsaV3_5G028690/CsaV3_1G046070/CsaV3_6G048680/CsaV3_4G008960	24	19	CsaV3_6G049050/CsaV3_3G010470/CsaV3_7G022930/CsaV3_6G040390/CsaV3_2G013320/CsaV3_5G036470/CsaV3_6G040340/CsaV3_2G001570/CsaV3_7G031080/CsaV3_5G034810/CsaV3_3G007170/CsaV3_3G021780/CsaV3_4G037690/CsaV3_1G005960/CsaV3_2G028640/CsaV3_6G040430/CsaV3_5G028690/CsaV3_1G046070/CsaV3_6G048680	5	CsaV3_6G048080/CsaV3_3G023460/CsaV3_7G021470/CsaV3_4G004200/CsaV3_4G008960
BP	GO:0046390	ribose phosphate biosynthetic process	24/1218	53/5833	5.39911e-05	0.000568983	CsaV3_6G049050/CsaV3_3G010470/CsaV3_7G022930/CsaV3_6G040390/CsaV3_2G013320/CsaV3_5G036470/CsaV3_6G040340/CsaV3_2G001570/CsaV3_7G031080/CsaV3_6G048080/CsaV3_3G023460/CsaV3_5G034810/CsaV3_7G021470/CsaV3_3G007170/CsaV3_4G004200/CsaV3_3G021780/CsaV3_4G037690/CsaV3_1G005960/CsaV3_2G028640/CsaV3_6G040430/CsaV3_5G028690/CsaV3_1G046070/CsaV3_6G048680/CsaV3_4G008960	CsaV3_6G049050/CsaV3_3G010470/CsaV3_7G022930/CsaV3_6G040390/CsaV3_2G013320/CsaV3_5G036470/CsaV3_6G040340/CsaV3_2G001570/CsaV3_7G031080/CsaV3_6G048080/CsaV3_3G023460/CsaV3_5G034810/CsaV3_7G021470/CsaV3_3G007170/CsaV3_4G004200/CsaV3_3G021780/CsaV3_4G037690/CsaV3_1G005960/CsaV3_2G028640/CsaV3_6G040430/CsaV3_5G028690/CsaV3_1G046070/CsaV3_6G048680/CsaV3_4G008960	24	19	CsaV3_6G049050/CsaV3_3G010470/CsaV3_7G022930/CsaV3_6G040390/CsaV3_2G013320/CsaV3_5G036470/CsaV3_6G040340/CsaV3_2G001570/CsaV3_7G031080/CsaV3_5G034810/CsaV3_3G007170/CsaV3_3G021780/CsaV3_4G037690/CsaV3_1G005960/CsaV3_2G028640/CsaV3_6G040430/CsaV3_5G028690/CsaV3_1G046070/CsaV3_6G048680	5	CsaV3_6G048080/CsaV3_3G023460/CsaV3_7G021470/CsaV3_4G004200/CsaV3_4G008960
BP	GO:0019693	ribose phosphate metabolic process	30/1218	74/5833	8.65482e-05	0.000889283	CsaV3_6G049050/CsaV3_3G010470/CsaV3_7G022930/CsaV3_6G040390/CsaV3_2G013320/CsaV3_5G036470/CsaV3_5G034910/CsaV3_6G040340/CsaV3_2G001570/CsaV3_2G004240/CsaV3_7G031080/CsaV3_6G048080/CsaV3_3G023460/CsaV3_5G034810/CsaV3_5G028490/CsaV3_5G038830/CsaV3_7G021470/CsaV3_3G007170/CsaV3_4G004200/CsaV3_3G021780/CsaV3_4G037690/CsaV3_1G005960/CsaV3_2G028640/CsaV3_6G040430/CsaV3_3G046570/CsaV3_1G037750/CsaV3_5G0…	CsaV3_6G049050/CsaV3_3G010470/CsaV3_7G022930/CsaV3_6G040390/CsaV3_2G013320/CsaV3_5G036470/CsaV3_5G034910/CsaV3_6G040340/CsaV3_2G001570/CsaV3_2G004240/CsaV3_7G031080/CsaV3_6G048080/CsaV3_3G023460/CsaV3_5G034810/CsaV3_5G028490/CsaV3_5G038830/CsaV3_7G021470/CsaV3_3G007170/CsaV3_4G004200/CsaV3_3G021780/CsaV3_4G037690/CsaV3_1G005960/CsaV3_2G028640/CsaV3_6G040430/CsaV3_3G046570/CsaV3_1G037750/CsaV3_5G0…	30	24	CsaV3_6G049050/CsaV3_3G010470/CsaV3_7G022930/CsaV3_6G040390/CsaV3_2G013320/CsaV3_5G036470/CsaV3_6G040340/CsaV3_2G001570/CsaV3_2G004240/CsaV3_7G031080/CsaV3_5G034810/CsaV3_5G028490/CsaV3_5G038830/CsaV3_3G007170/CsaV3_3G021780/CsaV3_4G037690/CsaV3_1G005960/CsaV3_2G028640/CsaV3_6G040430/CsaV3_3G046570/CsaV3_1G037750/CsaV3_5G028690/CsaV3_1G046070/CsaV3_6G048680	6	CsaV3_5G034910/CsaV3_6G048080/CsaV3_3G023460/CsaV3_7G021470/CsaV3_4G004200/CsaV3_4G008960
BP	GO:0034404	nucleobase-containing small molecule biosynthetic process	17/1218	33/5833	9.23295e-05	0.000925547	CsaV3_7G022930/CsaV3_6G040390/CsaV3_2G013320/CsaV3_6G040340/CsaV3_6G048080/CsaV3_3G023460/CsaV3_7G021470/CsaV3_3G007170/CsaV3_4G004200/CsaV3_3G021780/CsaV3_4G037690/CsaV3_2G028640/CsaV3_6G040430/CsaV3_5G028690/CsaV3_1G046070/CsaV3_6G048680/CsaV3_4G008960	CsaV3_7G022930/CsaV3_6G040390/CsaV3_2G013320/CsaV3_6G040340/CsaV3_6G048080/CsaV3_3G023460/CsaV3_7G021470/CsaV3_3G007170/CsaV3_4G004200/CsaV3_3G021780/CsaV3_4G037690/CsaV3_2G028640/CsaV3_6G040430/CsaV3_5G028690/CsaV3_1G046070/CsaV3_6G048680/CsaV3_4G008960	17	12	CsaV3_7G022930/CsaV3_6G040390/CsaV3_2G013320/CsaV3_6G040340/CsaV3_3G007170/CsaV3_3G021780/CsaV3_4G037690/CsaV3_2G028640/CsaV3_6G040430/CsaV3_5G028690/CsaV3_1G046070/CsaV3_6G048680	5	CsaV3_6G048080/CsaV3_3G023460/CsaV3_7G021470/CsaV3_4G004200/CsaV3_4G008960
BP	GO:0009126	purine nucleoside monophosphate metabolic process	24/1218	55/5833	0.000111672	0.00104312	CsaV3_6G049050/CsaV3_3G010470/CsaV3_7G022930/CsaV3_6G040390/CsaV3_2G013320/CsaV3_5G036470/CsaV3_6G040340/CsaV3_2G001570/CsaV3_7G031080/CsaV3_6G048080/CsaV3_3G023460/CsaV3_5G034810/CsaV3_7G021470/CsaV3_4G004200/CsaV3_3G021780/CsaV3_4G037690/CsaV3_1G005960/CsaV3_2G028640/CsaV3_6G040430/CsaV3_3G046570/CsaV3_5G028690/CsaV3_1G046070/CsaV3_6G048680/CsaV3_4G008960	CsaV3_6G049050/CsaV3_3G010470/CsaV3_7G022930/CsaV3_6G040390/CsaV3_2G013320/CsaV3_5G036470/CsaV3_6G040340/CsaV3_2G001570/CsaV3_7G031080/CsaV3_6G048080/CsaV3_3G023460/CsaV3_5G034810/CsaV3_7G021470/CsaV3_4G004200/CsaV3_3G021780/CsaV3_4G037690/CsaV3_1G005960/CsaV3_2G028640/CsaV3_6G040430/CsaV3_3G046570/CsaV3_5G028690/CsaV3_1G046070/CsaV3_6G048680/CsaV3_4G008960	24	19	CsaV3_6G049050/CsaV3_3G010470/CsaV3_7G022930/CsaV3_6G040390/CsaV3_2G013320/CsaV3_5G036470/CsaV3_6G040340/CsaV3_2G001570/CsaV3_7G031080/CsaV3_5G034810/CsaV3_3G021780/CsaV3_4G037690/CsaV3_1G005960/CsaV3_2G028640/CsaV3_6G040430/CsaV3_3G046570/CsaV3_5G028690/CsaV3_1G046070/CsaV3_6G048680	5	CsaV3_6G048080/CsaV3_3G023460/CsaV3_7G021470/CsaV3_4G004200/CsaV3_4G008960
BP	GO:0009161	ribonucleoside monophosphate metabolic process	24/1218	55/5833	0.000111672	0.00104312	CsaV3_6G049050/CsaV3_3G010470/CsaV3_7G022930/CsaV3_6G040390/CsaV3_2G013320/CsaV3_5G036470/CsaV3_6G040340/CsaV3_2G001570/CsaV3_7G031080/CsaV3_6G048080/CsaV3_3G023460/CsaV3_5G034810/CsaV3_7G021470/CsaV3_4G004200/CsaV3_3G021780/CsaV3_4G037690/CsaV3_1G005960/CsaV3_2G028640/CsaV3_6G040430/CsaV3_3G046570/CsaV3_5G028690/CsaV3_1G046070/CsaV3_6G048680/CsaV3_4G008960	CsaV3_6G049050/CsaV3_3G010470/CsaV3_7G022930/CsaV3_6G040390/CsaV3_2G013320/CsaV3_5G036470/CsaV3_6G040340/CsaV3_2G001570/CsaV3_7G031080/CsaV3_6G048080/CsaV3_3G023460/CsaV3_5G034810/CsaV3_7G021470/CsaV3_4G004200/CsaV3_3G021780/CsaV3_4G037690/CsaV3_1G005960/CsaV3_2G028640/CsaV3_6G040430/CsaV3_3G046570/CsaV3_5G028690/CsaV3_1G046070/CsaV3_6G048680/CsaV3_4G008960	24	19	CsaV3_6G049050/CsaV3_3G010470/CsaV3_7G022930/CsaV3_6G040390/CsaV3_2G013320/CsaV3_5G036470/CsaV3_6G040340/CsaV3_2G001570/CsaV3_7G031080/CsaV3_5G034810/CsaV3_3G021780/CsaV3_4G037690/CsaV3_1G005960/CsaV3_2G028640/CsaV3_6G040430/CsaV3_3G046570/CsaV3_5G028690/CsaV3_1G046070/CsaV3_6G048680	5	CsaV3_6G048080/CsaV3_3G023460/CsaV3_7G021470/CsaV3_4G004200/CsaV3_4G008960
BP	GO:0009167	purine ribonucleoside monophosphate metabolic process	24/1218	55/5833	0.000111672	0.00104312	CsaV3_6G049050/CsaV3_3G010470/CsaV3_7G022930/CsaV3_6G040390/CsaV3_2G013320/CsaV3_5G036470/CsaV3_6G040340/CsaV3_2G001570/CsaV3_7G031080/CsaV3_6G048080/CsaV3_3G023460/CsaV3_5G034810/CsaV3_7G021470/CsaV3_4G004200/CsaV3_3G021780/CsaV3_4G037690/CsaV3_1G005960/CsaV3_2G028640/CsaV3_6G040430/CsaV3_3G046570/CsaV3_5G028690/CsaV3_1G046070/CsaV3_6G048680/CsaV3_4G008960	CsaV3_6G049050/CsaV3_3G010470/CsaV3_7G022930/CsaV3_6G040390/CsaV3_2G013320/CsaV3_5G036470/CsaV3_6G040340/CsaV3_2G001570/CsaV3_7G031080/CsaV3_6G048080/CsaV3_3G023460/CsaV3_5G034810/CsaV3_7G021470/CsaV3_4G004200/CsaV3_3G021780/CsaV3_4G037690/CsaV3_1G005960/CsaV3_2G028640/CsaV3_6G040430/CsaV3_3G046570/CsaV3_5G028690/CsaV3_1G046070/CsaV3_6G048680/CsaV3_4G008960	24	19	CsaV3_6G049050/CsaV3_3G010470/CsaV3_7G022930/CsaV3_6G040390/CsaV3_2G013320/CsaV3_5G036470/CsaV3_6G040340/CsaV3_2G001570/CsaV3_7G031080/CsaV3_5G034810/CsaV3_3G021780/CsaV3_4G037690/CsaV3_1G005960/CsaV3_2G028640/CsaV3_6G040430/CsaV3_3G046570/CsaV3_5G028690/CsaV3_1G046070/CsaV3_6G048680	5	CsaV3_6G048080/CsaV3_3G023460/CsaV3_7G021470/CsaV3_4G004200/CsaV3_4G008960
BP	GO:0009123	nucleoside monophosphate metabolic process	24/1218	56/5833	0.000157306	0.00143673	CsaV3_6G049050/CsaV3_3G010470/CsaV3_7G022930/CsaV3_6G040390/CsaV3_2G013320/CsaV3_5G036470/CsaV3_6G040340/CsaV3_2G001570/CsaV3_7G031080/CsaV3_6G048080/CsaV3_3G023460/CsaV3_5G034810/CsaV3_7G021470/CsaV3_4G004200/CsaV3_3G021780/CsaV3_4G037690/CsaV3_1G005960/CsaV3_2G028640/CsaV3_6G040430/CsaV3_3G046570/CsaV3_5G028690/CsaV3_1G046070/CsaV3_6G048680/CsaV3_4G008960	CsaV3_6G049050/CsaV3_3G010470/CsaV3_7G022930/CsaV3_6G040390/CsaV3_2G013320/CsaV3_5G036470/CsaV3_6G040340/CsaV3_2G001570/CsaV3_7G031080/CsaV3_6G048080/CsaV3_3G023460/CsaV3_5G034810/CsaV3_7G021470/CsaV3_4G004200/CsaV3_3G021780/CsaV3_4G037690/CsaV3_1G005960/CsaV3_2G028640/CsaV3_6G040430/CsaV3_3G046570/CsaV3_5G028690/CsaV3_1G046070/CsaV3_6G048680/CsaV3_4G008960	24	19	CsaV3_6G049050/CsaV3_3G010470/CsaV3_7G022930/CsaV3_6G040390/CsaV3_2G013320/CsaV3_5G036470/CsaV3_6G040340/CsaV3_2G001570/CsaV3_7G031080/CsaV3_5G034810/CsaV3_3G021780/CsaV3_4G037690/CsaV3_1G005960/CsaV3_2G028640/CsaV3_6G040430/CsaV3_3G046570/CsaV3_5G028690/CsaV3_1G046070/CsaV3_6G048680	5	CsaV3_6G048080/CsaV3_3G023460/CsaV3_7G021470/CsaV3_4G004200/CsaV3_4G008960
BP	GO:0034655	nucleobase-containing compound catabolic process	19/1218	41/5833	0.000221546	0.00197947	CsaV3_7G022930/CsaV3_6G040390/CsaV3_2G013320/CsaV3_6G040340/CsaV3_UNG200520/CsaV3_6G048080/CsaV3_3G023460/CsaV3_UNG214460/CsaV3_7G018280/CsaV3_7G021470/CsaV3_4G004200/CsaV3_3G021780/CsaV3_4G037690/CsaV3_2G028640/CsaV3_6G040430/CsaV3_5G028690/CsaV3_1G046070/CsaV3_6G048680/CsaV3_4G008960	CsaV3_7G022930/CsaV3_6G040390/CsaV3_2G013320/CsaV3_6G040340/CsaV3_UNG200520/CsaV3_6G048080/CsaV3_3G023460/CsaV3_UNG214460/CsaV3_7G018280/CsaV3_7G021470/CsaV3_4G004200/CsaV3_3G021780/CsaV3_4G037690/CsaV3_2G028640/CsaV3_6G040430/CsaV3_5G028690/CsaV3_1G046070/CsaV3_6G048680/CsaV3_4G008960	19	11	CsaV3_7G022930/CsaV3_6G040390/CsaV3_2G013320/CsaV3_6G040340/CsaV3_3G021780/CsaV3_4G037690/CsaV3_2G028640/CsaV3_6G040430/CsaV3_5G028690/CsaV3_1G046070/CsaV3_6G048680	8	CsaV3_UNG200520/CsaV3_6G048080/CsaV3_3G023460/CsaV3_UNG214460/CsaV3_7G018280/CsaV3_7G021470/CsaV3_4G004200/CsaV3_4G008960
BP	GO:0072525	pyridine-containing compound biosynthetic process	17/1218	35/5833	0.000234057	0.00204676	CsaV3_7G022930/CsaV3_6G040390/CsaV3_2G013320/CsaV3_6G040340/CsaV3_6G048080/CsaV3_3G023460/CsaV3_3G033790/CsaV3_7G021470/CsaV3_4G004200/CsaV3_3G021780/CsaV3_4G037690/CsaV3_2G028640/CsaV3_6G040430/CsaV3_5G028690/CsaV3_1G046070/CsaV3_6G048680/CsaV3_4G008960	CsaV3_7G022930/CsaV3_6G040390/CsaV3_2G013320/CsaV3_6G040340/CsaV3_6G048080/CsaV3_3G023460/CsaV3_3G033790/CsaV3_7G021470/CsaV3_4G004200/CsaV3_3G021780/CsaV3_4G037690/CsaV3_2G028640/CsaV3_6G040430/CsaV3_5G028690/CsaV3_1G046070/CsaV3_6G048680/CsaV3_4G008960	17	11	CsaV3_7G022930/CsaV3_6G040390/CsaV3_2G013320/CsaV3_6G040340/CsaV3_3G021780/CsaV3_4G037690/CsaV3_2G028640/CsaV3_6G040430/CsaV3_5G028690/CsaV3_1G046070/CsaV3_6G048680	6	CsaV3_6G048080/CsaV3_3G023460/CsaV3_3G033790/CsaV3_7G021470/CsaV3_4G004200/CsaV3_4G008960
BP	GO:0046700	heterocycle catabolic process	21/1218	48/5833	0.000284215	0.00238549	CsaV3_7G022930/CsaV3_6G040390/CsaV3_2G013320/CsaV3_6G040340/CsaV3_UNG200520/CsaV3_6G048080/CsaV3_3G023460/CsaV3_UNG214460/CsaV3_7G018280/CsaV3_7G021470/CsaV3_1G030090/CsaV3_4G004200/CsaV3_7G008290/CsaV3_3G021780/CsaV3_4G037690/CsaV3_2G028640/CsaV3_6G040430/CsaV3_5G028690/CsaV3_1G046070/CsaV3_6G048680/CsaV3_4G008960	CsaV3_7G022930/CsaV3_6G040390/CsaV3_2G013320/CsaV3_6G040340/CsaV3_UNG200520/CsaV3_6G048080/CsaV3_3G023460/CsaV3_UNG214460/CsaV3_7G018280/CsaV3_7G021470/CsaV3_1G030090/CsaV3_4G004200/CsaV3_7G008290/CsaV3_3G021780/CsaV3_4G037690/CsaV3_2G028640/CsaV3_6G040430/CsaV3_5G028690/CsaV3_1G046070/CsaV3_6G048680/CsaV3_4G008960	21	12	CsaV3_7G022930/CsaV3_6G040390/CsaV3_2G013320/CsaV3_6G040340/CsaV3_7G008290/CsaV3_3G021780/CsaV3_4G037690/CsaV3_2G028640/CsaV3_6G040430/CsaV3_5G028690/CsaV3_1G046070/CsaV3_6G048680	9	CsaV3_UNG200520/CsaV3_6G048080/CsaV3_3G023460/CsaV3_UNG214460/CsaV3_7G018280/CsaV3_7G021470/CsaV3_1G030090/CsaV3_4G004200/CsaV3_4G008960
BP	GO:0009165	nucleotide biosynthetic process	27/1218	68/5833	0.000290205	0.00238549	CsaV3_6G049050/CsaV3_3G010470/CsaV3_7G022930/CsaV3_6G053210/CsaV3_6G040390/CsaV3_2G013320/CsaV3_5G036470/CsaV3_6G040340/CsaV3_2G001570/CsaV3_7G031080/CsaV3_6G048080/CsaV3_3G023460/CsaV3_5G034810/CsaV3_7G021470/CsaV3_3G007170/CsaV3_4G004200/CsaV3_3G021780/CsaV3_4G037690/CsaV3_1G005960/CsaV3_2G028640/CsaV3_6G040430/CsaV3_5G028690/CsaV3_1G016970/CsaV3_1G046070/CsaV3_1G010170/CsaV3_6G048680/CsaV3_4G0…	CsaV3_6G049050/CsaV3_3G010470/CsaV3_7G022930/CsaV3_6G053210/CsaV3_6G040390/CsaV3_2G013320/CsaV3_5G036470/CsaV3_6G040340/CsaV3_2G001570/CsaV3_7G031080/CsaV3_6G048080/CsaV3_3G023460/CsaV3_5G034810/CsaV3_7G021470/CsaV3_3G007170/CsaV3_4G004200/CsaV3_3G021780/CsaV3_4G037690/CsaV3_1G005960/CsaV3_2G028640/CsaV3_6G040430/CsaV3_5G028690/CsaV3_1G016970/CsaV3_1G046070/CsaV3_1G010170/CsaV3_6G048680/CsaV3_4G0…	27	21	CsaV3_6G049050/CsaV3_3G010470/CsaV3_7G022930/CsaV3_6G053210/CsaV3_6G040390/CsaV3_2G013320/CsaV3_5G036470/CsaV3_6G040340/CsaV3_2G001570/CsaV3_7G031080/CsaV3_5G034810/CsaV3_3G007170/CsaV3_3G021780/CsaV3_4G037690/CsaV3_1G005960/CsaV3_2G028640/CsaV3_6G040430/CsaV3_5G028690/CsaV3_1G046070/CsaV3_1G010170/CsaV3_6G048680	6	CsaV3_6G048080/CsaV3_3G023460/CsaV3_7G021470/CsaV3_4G004200/CsaV3_1G016970/CsaV3_4G008960
BP	GO:1901293	nucleoside phosphate biosynthetic process	27/1218	68/5833	0.000290205	0.00238549	CsaV3_6G049050/CsaV3_3G010470/CsaV3_7G022930/CsaV3_6G053210/CsaV3_6G040390/CsaV3_2G013320/CsaV3_5G036470/CsaV3_6G040340/CsaV3_2G001570/CsaV3_7G031080/CsaV3_6G048080/CsaV3_3G023460/CsaV3_5G034810/CsaV3_7G021470/CsaV3_3G007170/CsaV3_4G004200/CsaV3_3G021780/CsaV3_4G037690/CsaV3_1G005960/CsaV3_2G028640/CsaV3_6G040430/CsaV3_5G028690/CsaV3_1G016970/CsaV3_1G046070/CsaV3_1G010170/CsaV3_6G048680/CsaV3_4G0…	CsaV3_6G049050/CsaV3_3G010470/CsaV3_7G022930/CsaV3_6G053210/CsaV3_6G040390/CsaV3_2G013320/CsaV3_5G036470/CsaV3_6G040340/CsaV3_2G001570/CsaV3_7G031080/CsaV3_6G048080/CsaV3_3G023460/CsaV3_5G034810/CsaV3_7G021470/CsaV3_3G007170/CsaV3_4G004200/CsaV3_3G021780/CsaV3_4G037690/CsaV3_1G005960/CsaV3_2G028640/CsaV3_6G040430/CsaV3_5G028690/CsaV3_1G016970/CsaV3_1G046070/CsaV3_1G010170/CsaV3_6G048680/CsaV3_4G0…	27	21	CsaV3_6G049050/CsaV3_3G010470/CsaV3_7G022930/CsaV3_6G053210/CsaV3_6G040390/CsaV3_2G013320/CsaV3_5G036470/CsaV3_6G040340/CsaV3_2G001570/CsaV3_7G031080/CsaV3_5G034810/CsaV3_3G007170/CsaV3_3G021780/CsaV3_4G037690/CsaV3_1G005960/CsaV3_2G028640/CsaV3_6G040430/CsaV3_5G028690/CsaV3_1G046070/CsaV3_1G010170/CsaV3_6G048680	6	CsaV3_6G048080/CsaV3_3G023460/CsaV3_7G021470/CsaV3_4G004200/CsaV3_1G016970/CsaV3_4G008960
BP	GO:0055086	nucleobase-containing small molecule metabolic process	38/1218	107/5833	0.000298279	0.00240377	CsaV3_6G049050/CsaV3_3G010470/CsaV3_7G022930/CsaV3_1G045800/CsaV3_6G053210/CsaV3_6G040390/CsaV3_2G013320/CsaV3_5G036470/CsaV3_5G034910/CsaV3_6G040340/CsaV3_2G001570/CsaV3_2G004240/CsaV3_7G031080/CsaV3_6G048080/CsaV3_3G023460/CsaV3_2G026200/CsaV3_5G034810/CsaV3_5G028490/CsaV3_6G038100/CsaV3_5G038830/CsaV3_7G021470/CsaV3_3G007170/CsaV3_4G004200/CsaV3_3G021780/CsaV3_4G037690/CsaV3_1G005960/CsaV3_2G0…	CsaV3_6G049050/CsaV3_3G010470/CsaV3_7G022930/CsaV3_1G045800/CsaV3_6G053210/CsaV3_6G040390/CsaV3_2G013320/CsaV3_5G036470/CsaV3_5G034910/CsaV3_6G040340/CsaV3_2G001570/CsaV3_2G004240/CsaV3_7G031080/CsaV3_6G048080/CsaV3_3G023460/CsaV3_2G026200/CsaV3_5G034810/CsaV3_5G028490/CsaV3_6G038100/CsaV3_5G038830/CsaV3_7G021470/CsaV3_3G007170/CsaV3_4G004200/CsaV3_3G021780/CsaV3_4G037690/CsaV3_1G005960/CsaV3_2G0…	38	30	CsaV3_6G049050/CsaV3_3G010470/CsaV3_7G022930/CsaV3_1G045800/CsaV3_6G053210/CsaV3_6G040390/CsaV3_2G013320/CsaV3_5G036470/CsaV3_6G040340/CsaV3_2G001570/CsaV3_2G004240/CsaV3_7G031080/CsaV3_2G026200/CsaV3_5G034810/CsaV3_5G028490/CsaV3_6G038100/CsaV3_5G038830/CsaV3_3G007170/CsaV3_3G021780/CsaV3_4G037690/CsaV3_1G005960/CsaV3_2G028640/CsaV3_5G024820/CsaV3_6G040430/CsaV3_3G046570/CsaV3_1G037750/CsaV3_5G0…	8	CsaV3_5G034910/CsaV3_6G048080/CsaV3_3G023460/CsaV3_7G021470/CsaV3_4G004200/CsaV3_2G015340/CsaV3_1G016970/CsaV3_4G008960
BP	GO:0019359	nicotinamide nucleotide biosynthetic process	16/1218	33/5833	0.000366133	0.00283926	CsaV3_7G022930/CsaV3_6G040390/CsaV3_2G013320/CsaV3_6G040340/CsaV3_6G048080/CsaV3_3G023460/CsaV3_7G021470/CsaV3_4G004200/CsaV3_3G021780/CsaV3_4G037690/CsaV3_2G028640/CsaV3_6G040430/CsaV3_5G028690/CsaV3_1G046070/CsaV3_6G048680/CsaV3_4G008960	CsaV3_7G022930/CsaV3_6G040390/CsaV3_2G013320/CsaV3_6G040340/CsaV3_6G048080/CsaV3_3G023460/CsaV3_7G021470/CsaV3_4G004200/CsaV3_3G021780/CsaV3_4G037690/CsaV3_2G028640/CsaV3_6G040430/CsaV3_5G028690/CsaV3_1G046070/CsaV3_6G048680/CsaV3_4G008960	16	11	CsaV3_7G022930/CsaV3_6G040390/CsaV3_2G013320/CsaV3_6G040340/CsaV3_3G021780/CsaV3_4G037690/CsaV3_2G028640/CsaV3_6G040430/CsaV3_5G028690/CsaV3_1G046070/CsaV3_6G048680	5	CsaV3_6G048080/CsaV3_3G023460/CsaV3_7G021470/CsaV3_4G004200/CsaV3_4G008960
BP	GO:0019363	pyridine nucleotide biosynthetic process	16/1218	33/5833	0.000366133	0.00283926	CsaV3_7G022930/CsaV3_6G040390/CsaV3_2G013320/CsaV3_6G040340/CsaV3_6G048080/CsaV3_3G023460/CsaV3_7G021470/CsaV3_4G004200/CsaV3_3G021780/CsaV3_4G037690/CsaV3_2G028640/CsaV3_6G040430/CsaV3_5G028690/CsaV3_1G046070/CsaV3_6G048680/CsaV3_4G008960	CsaV3_7G022930/CsaV3_6G040390/CsaV3_2G013320/CsaV3_6G040340/CsaV3_6G048080/CsaV3_3G023460/CsaV3_7G021470/CsaV3_4G004200/CsaV3_3G021780/CsaV3_4G037690/CsaV3_2G028640/CsaV3_6G040430/CsaV3_5G028690/CsaV3_1G046070/CsaV3_6G048680/CsaV3_4G008960	16	11	CsaV3_7G022930/CsaV3_6G040390/CsaV3_2G013320/CsaV3_6G040340/CsaV3_3G021780/CsaV3_4G037690/CsaV3_2G028640/CsaV3_6G040430/CsaV3_5G028690/CsaV3_1G046070/CsaV3_6G048680	5	CsaV3_6G048080/CsaV3_3G023460/CsaV3_7G021470/CsaV3_4G004200/CsaV3_4G008960
BP	GO:0044270	cellular nitrogen compound catabolic process	21/1218	49/5833	0.000400948	0.00299618	CsaV3_7G022930/CsaV3_6G040390/CsaV3_2G013320/CsaV3_6G040340/CsaV3_UNG200520/CsaV3_6G048080/CsaV3_3G023460/CsaV3_UNG214460/CsaV3_7G018280/CsaV3_7G021470/CsaV3_1G030090/CsaV3_4G004200/CsaV3_7G008290/CsaV3_3G021780/CsaV3_4G037690/CsaV3_2G028640/CsaV3_6G040430/CsaV3_5G028690/CsaV3_1G046070/CsaV3_6G048680/CsaV3_4G008960	CsaV3_7G022930/CsaV3_6G040390/CsaV3_2G013320/CsaV3_6G040340/CsaV3_UNG200520/CsaV3_6G048080/CsaV3_3G023460/CsaV3_UNG214460/CsaV3_7G018280/CsaV3_7G021470/CsaV3_1G030090/CsaV3_4G004200/CsaV3_7G008290/CsaV3_3G021780/CsaV3_4G037690/CsaV3_2G028640/CsaV3_6G040430/CsaV3_5G028690/CsaV3_1G046070/CsaV3_6G048680/CsaV3_4G008960	21	12	CsaV3_7G022930/CsaV3_6G040390/CsaV3_2G013320/CsaV3_6G040340/CsaV3_7G008290/CsaV3_3G021780/CsaV3_4G037690/CsaV3_2G028640/CsaV3_6G040430/CsaV3_5G028690/CsaV3_1G046070/CsaV3_6G048680	9	CsaV3_UNG200520/CsaV3_6G048080/CsaV3_3G023460/CsaV3_UNG214460/CsaV3_7G018280/CsaV3_7G021470/CsaV3_1G030090/CsaV3_4G004200/CsaV3_4G008960
BP	GO:1901361	organic cyclic compound catabolic process	21/1218	49/5833	0.000400948	0.00299618	CsaV3_7G022930/CsaV3_6G040390/CsaV3_2G013320/CsaV3_6G040340/CsaV3_UNG200520/CsaV3_6G048080/CsaV3_3G023460/CsaV3_UNG214460/CsaV3_7G018280/CsaV3_7G021470/CsaV3_1G030090/CsaV3_4G004200/CsaV3_7G008290/CsaV3_3G021780/CsaV3_4G037690/CsaV3_2G028640/CsaV3_6G040430/CsaV3_5G028690/CsaV3_1G046070/CsaV3_6G048680/CsaV3_4G008960	CsaV3_7G022930/CsaV3_6G040390/CsaV3_2G013320/CsaV3_6G040340/CsaV3_UNG200520/CsaV3_6G048080/CsaV3_3G023460/CsaV3_UNG214460/CsaV3_7G018280/CsaV3_7G021470/CsaV3_1G030090/CsaV3_4G004200/CsaV3_7G008290/CsaV3_3G021780/CsaV3_4G037690/CsaV3_2G028640/CsaV3_6G040430/CsaV3_5G028690/CsaV3_1G046070/CsaV3_6G048680/CsaV3_4G008960	21	12	CsaV3_7G022930/CsaV3_6G040390/CsaV3_2G013320/CsaV3_6G040340/CsaV3_7G008290/CsaV3_3G021780/CsaV3_4G037690/CsaV3_2G028640/CsaV3_6G040430/CsaV3_5G028690/CsaV3_1G046070/CsaV3_6G048680	9	CsaV3_UNG200520/CsaV3_6G048080/CsaV3_3G023460/CsaV3_UNG214460/CsaV3_7G018280/CsaV3_7G021470/CsaV3_1G030090/CsaV3_4G004200/CsaV3_4G008960
BP	GO:0009117	nucleotide metabolic process	33/1218	91/5833	0.00047554	0.00349012	CsaV3_6G049050/CsaV3_3G010470/CsaV3_7G022930/CsaV3_6G053210/CsaV3_6G040390/CsaV3_2G013320/CsaV3_5G036470/CsaV3_5G034910/CsaV3_6G040340/CsaV3_2G001570/CsaV3_2G004240/CsaV3_7G031080/CsaV3_6G048080/CsaV3_3G023460/CsaV3_5G034810/CsaV3_5G028490/CsaV3_5G038830/CsaV3_7G021470/CsaV3_3G007170/CsaV3_4G004200/CsaV3_3G021780/CsaV3_4G037690/CsaV3_1G005960/CsaV3_2G028640/CsaV3_6G040430/CsaV3_3G046570/CsaV3_1G0…	CsaV3_6G049050/CsaV3_3G010470/CsaV3_7G022930/CsaV3_6G053210/CsaV3_6G040390/CsaV3_2G013320/CsaV3_5G036470/CsaV3_5G034910/CsaV3_6G040340/CsaV3_2G001570/CsaV3_2G004240/CsaV3_7G031080/CsaV3_6G048080/CsaV3_3G023460/CsaV3_5G034810/CsaV3_5G028490/CsaV3_5G038830/CsaV3_7G021470/CsaV3_3G007170/CsaV3_4G004200/CsaV3_3G021780/CsaV3_4G037690/CsaV3_1G005960/CsaV3_2G028640/CsaV3_6G040430/CsaV3_3G046570/CsaV3_1G0…	33	26	CsaV3_6G049050/CsaV3_3G010470/CsaV3_7G022930/CsaV3_6G053210/CsaV3_6G040390/CsaV3_2G013320/CsaV3_5G036470/CsaV3_6G040340/CsaV3_2G001570/CsaV3_2G004240/CsaV3_7G031080/CsaV3_5G034810/CsaV3_5G028490/CsaV3_5G038830/CsaV3_3G007170/CsaV3_3G021780/CsaV3_4G037690/CsaV3_1G005960/CsaV3_2G028640/CsaV3_6G040430/CsaV3_3G046570/CsaV3_1G037750/CsaV3_5G028690/CsaV3_1G046070/CsaV3_1G010170/CsaV3_6G048680	7	CsaV3_5G034910/CsaV3_6G048080/CsaV3_3G023460/CsaV3_7G021470/CsaV3_4G004200/CsaV3_1G016970/CsaV3_4G008960
BP	GO:0019439	aromatic compound catabolic process	21/1218	50/5833	0.000557369	0.00401892	CsaV3_7G022930/CsaV3_6G040390/CsaV3_2G013320/CsaV3_6G040340/CsaV3_UNG200520/CsaV3_6G048080/CsaV3_3G023460/CsaV3_UNG214460/CsaV3_7G018280/CsaV3_7G021470/CsaV3_1G030090/CsaV3_4G004200/CsaV3_7G008290/CsaV3_3G021780/CsaV3_4G037690/CsaV3_2G028640/CsaV3_6G040430/CsaV3_5G028690/CsaV3_1G046070/CsaV3_6G048680/CsaV3_4G008960	CsaV3_7G022930/CsaV3_6G040390/CsaV3_2G013320/CsaV3_6G040340/CsaV3_UNG200520/CsaV3_6G048080/CsaV3_3G023460/CsaV3_UNG214460/CsaV3_7G018280/CsaV3_7G021470/CsaV3_1G030090/CsaV3_4G004200/CsaV3_7G008290/CsaV3_3G021780/CsaV3_4G037690/CsaV3_2G028640/CsaV3_6G040430/CsaV3_5G028690/CsaV3_1G046070/CsaV3_6G048680/CsaV3_4G008960	21	12	CsaV3_7G022930/CsaV3_6G040390/CsaV3_2G013320/CsaV3_6G040340/CsaV3_7G008290/CsaV3_3G021780/CsaV3_4G037690/CsaV3_2G028640/CsaV3_6G040430/CsaV3_5G028690/CsaV3_1G046070/CsaV3_6G048680	9	CsaV3_UNG200520/CsaV3_6G048080/CsaV3_3G023460/CsaV3_UNG214460/CsaV3_7G018280/CsaV3_7G021470/CsaV3_1G030090/CsaV3_4G004200/CsaV3_4G008960
BP	GO:0006753	nucleoside phosphate metabolic process	33/1218	92/5833	0.000596004	0.00422341	CsaV3_6G049050/CsaV3_3G010470/CsaV3_7G022930/CsaV3_6G053210/CsaV3_6G040390/CsaV3_2G013320/CsaV3_5G036470/CsaV3_5G034910/CsaV3_6G040340/CsaV3_2G001570/CsaV3_2G004240/CsaV3_7G031080/CsaV3_6G048080/CsaV3_3G023460/CsaV3_5G034810/CsaV3_5G028490/CsaV3_5G038830/CsaV3_7G021470/CsaV3_3G007170/CsaV3_4G004200/CsaV3_3G021780/CsaV3_4G037690/CsaV3_1G005960/CsaV3_2G028640/CsaV3_6G040430/CsaV3_3G046570/CsaV3_1G0…	CsaV3_6G049050/CsaV3_3G010470/CsaV3_7G022930/CsaV3_6G053210/CsaV3_6G040390/CsaV3_2G013320/CsaV3_5G036470/CsaV3_5G034910/CsaV3_6G040340/CsaV3_2G001570/CsaV3_2G004240/CsaV3_7G031080/CsaV3_6G048080/CsaV3_3G023460/CsaV3_5G034810/CsaV3_5G028490/CsaV3_5G038830/CsaV3_7G021470/CsaV3_3G007170/CsaV3_4G004200/CsaV3_3G021780/CsaV3_4G037690/CsaV3_1G005960/CsaV3_2G028640/CsaV3_6G040430/CsaV3_3G046570/CsaV3_1G0…	33	26	CsaV3_6G049050/CsaV3_3G010470/CsaV3_7G022930/CsaV3_6G053210/CsaV3_6G040390/CsaV3_2G013320/CsaV3_5G036470/CsaV3_6G040340/CsaV3_2G001570/CsaV3_2G004240/CsaV3_7G031080/CsaV3_5G034810/CsaV3_5G028490/CsaV3_5G038830/CsaV3_3G007170/CsaV3_3G021780/CsaV3_4G037690/CsaV3_1G005960/CsaV3_2G028640/CsaV3_6G040430/CsaV3_3G046570/CsaV3_1G037750/CsaV3_5G028690/CsaV3_1G046070/CsaV3_1G010170/CsaV3_6G048680	7	CsaV3_5G034910/CsaV3_6G048080/CsaV3_3G023460/CsaV3_7G021470/CsaV3_4G004200/CsaV3_1G016970/CsaV3_4G008960
BP	GO:0006732	coenzyme metabolic process	25/1218	65/5833	0.000842552	0.00586931	CsaV3_6G036910/CsaV3_7G022930/CsaV3_6G051460/CsaV3_6G040390/CsaV3_2G013320/CsaV3_5G034910/CsaV3_6G040340/CsaV3_2G004240/CsaV3_6G048080/CsaV3_3G023460/CsaV3_1G042270/CsaV3_5G028490/CsaV3_3G033790/CsaV3_5G038830/CsaV3_7G021470/CsaV3_4G004200/CsaV3_3G021780/CsaV3_4G037690/CsaV3_2G028640/CsaV3_6G040430/CsaV3_1G037750/CsaV3_5G028690/CsaV3_1G046070/CsaV3_6G048680/CsaV3_4G008960	CsaV3_6G036910/CsaV3_7G022930/CsaV3_6G051460/CsaV3_6G040390/CsaV3_2G013320/CsaV3_5G034910/CsaV3_6G040340/CsaV3_2G004240/CsaV3_6G048080/CsaV3_3G023460/CsaV3_1G042270/CsaV3_5G028490/CsaV3_3G033790/CsaV3_5G038830/CsaV3_7G021470/CsaV3_4G004200/CsaV3_3G021780/CsaV3_4G037690/CsaV3_2G028640/CsaV3_6G040430/CsaV3_1G037750/CsaV3_5G028690/CsaV3_1G046070/CsaV3_6G048680/CsaV3_4G008960	25	17	CsaV3_7G022930/CsaV3_6G051460/CsaV3_6G040390/CsaV3_2G013320/CsaV3_6G040340/CsaV3_2G004240/CsaV3_1G042270/CsaV3_5G028490/CsaV3_5G038830/CsaV3_3G021780/CsaV3_4G037690/CsaV3_2G028640/CsaV3_6G040430/CsaV3_1G037750/CsaV3_5G028690/CsaV3_1G046070/CsaV3_6G048680	8	CsaV3_6G036910/CsaV3_5G034910/CsaV3_6G048080/CsaV3_3G023460/CsaV3_3G033790/CsaV3_7G021470/CsaV3_4G004200/CsaV3_4G008960
BP	GO:0006163	purine nucleotide metabolic process	26/1218	70/5833	0.00122803	0.00841199	CsaV3_6G049050/CsaV3_3G010470/CsaV3_7G022930/CsaV3_6G040390/CsaV3_2G013320/CsaV3_5G036470/CsaV3_6G040340/CsaV3_2G001570/CsaV3_7G031080/CsaV3_6G048080/CsaV3_3G023460/CsaV3_5G034810/CsaV3_7G021470/CsaV3_3G007170/CsaV3_4G004200/CsaV3_3G021780/CsaV3_4G037690/CsaV3_1G005960/CsaV3_2G028640/CsaV3_6G040430/CsaV3_3G046570/CsaV3_5G028690/CsaV3_1G046070/CsaV3_1G010170/CsaV3_6G048680/CsaV3_4G008960	CsaV3_6G049050/CsaV3_3G010470/CsaV3_7G022930/CsaV3_6G040390/CsaV3_2G013320/CsaV3_5G036470/CsaV3_6G040340/CsaV3_2G001570/CsaV3_7G031080/CsaV3_6G048080/CsaV3_3G023460/CsaV3_5G034810/CsaV3_7G021470/CsaV3_3G007170/CsaV3_4G004200/CsaV3_3G021780/CsaV3_4G037690/CsaV3_1G005960/CsaV3_2G028640/CsaV3_6G040430/CsaV3_3G046570/CsaV3_5G028690/CsaV3_1G046070/CsaV3_1G010170/CsaV3_6G048680/CsaV3_4G008960	26	21	CsaV3_6G049050/CsaV3_3G010470/CsaV3_7G022930/CsaV3_6G040390/CsaV3_2G013320/CsaV3_5G036470/CsaV3_6G040340/CsaV3_2G001570/CsaV3_7G031080/CsaV3_5G034810/CsaV3_3G007170/CsaV3_3G021780/CsaV3_4G037690/CsaV3_1G005960/CsaV3_2G028640/CsaV3_6G040430/CsaV3_3G046570/CsaV3_5G028690/CsaV3_1G046070/CsaV3_1G010170/CsaV3_6G048680	5	CsaV3_6G048080/CsaV3_3G023460/CsaV3_7G021470/CsaV3_4G004200/CsaV3_4G008960
BP	GO:0072521	purine-containing compound metabolic process	26/1218	71/5833	0.00156052	0.0105143	CsaV3_6G049050/CsaV3_3G010470/CsaV3_7G022930/CsaV3_6G040390/CsaV3_2G013320/CsaV3_5G036470/CsaV3_6G040340/CsaV3_2G001570/CsaV3_7G031080/CsaV3_6G048080/CsaV3_3G023460/CsaV3_5G034810/CsaV3_7G021470/CsaV3_3G007170/CsaV3_4G004200/CsaV3_3G021780/CsaV3_4G037690/CsaV3_1G005960/CsaV3_2G028640/CsaV3_6G040430/CsaV3_3G046570/CsaV3_5G028690/CsaV3_1G046070/CsaV3_1G010170/CsaV3_6G048680/CsaV3_4G008960	CsaV3_6G049050/CsaV3_3G010470/CsaV3_7G022930/CsaV3_6G040390/CsaV3_2G013320/CsaV3_5G036470/CsaV3_6G040340/CsaV3_2G001570/CsaV3_7G031080/CsaV3_6G048080/CsaV3_3G023460/CsaV3_5G034810/CsaV3_7G021470/CsaV3_3G007170/CsaV3_4G004200/CsaV3_3G021780/CsaV3_4G037690/CsaV3_1G005960/CsaV3_2G028640/CsaV3_6G040430/CsaV3_3G046570/CsaV3_5G028690/CsaV3_1G046070/CsaV3_1G010170/CsaV3_6G048680/CsaV3_4G008960	26	21	CsaV3_6G049050/CsaV3_3G010470/CsaV3_7G022930/CsaV3_6G040390/CsaV3_2G013320/CsaV3_5G036470/CsaV3_6G040340/CsaV3_2G001570/CsaV3_7G031080/CsaV3_5G034810/CsaV3_3G007170/CsaV3_3G021780/CsaV3_4G037690/CsaV3_1G005960/CsaV3_2G028640/CsaV3_6G040430/CsaV3_3G046570/CsaV3_5G028690/CsaV3_1G046070/CsaV3_1G010170/CsaV3_6G048680	5	CsaV3_6G048080/CsaV3_3G023460/CsaV3_7G021470/CsaV3_4G004200/CsaV3_4G008960
BP	GO:0009150	purine ribonucleotide metabolic process	25/1218	68/5833	0.00178881	0.0116699	CsaV3_6G049050/CsaV3_3G010470/CsaV3_7G022930/CsaV3_6G040390/CsaV3_2G013320/CsaV3_5G036470/CsaV3_6G040340/CsaV3_2G001570/CsaV3_7G031080/CsaV3_6G048080/CsaV3_3G023460/CsaV3_5G034810/CsaV3_7G021470/CsaV3_3G007170/CsaV3_4G004200/CsaV3_3G021780/CsaV3_4G037690/CsaV3_1G005960/CsaV3_2G028640/CsaV3_6G040430/CsaV3_3G046570/CsaV3_5G028690/CsaV3_1G046070/CsaV3_6G048680/CsaV3_4G008960	CsaV3_6G049050/CsaV3_3G010470/CsaV3_7G022930/CsaV3_6G040390/CsaV3_2G013320/CsaV3_5G036470/CsaV3_6G040340/CsaV3_2G001570/CsaV3_7G031080/CsaV3_6G048080/CsaV3_3G023460/CsaV3_5G034810/CsaV3_7G021470/CsaV3_3G007170/CsaV3_4G004200/CsaV3_3G021780/CsaV3_4G037690/CsaV3_1G005960/CsaV3_2G028640/CsaV3_6G040430/CsaV3_3G046570/CsaV3_5G028690/CsaV3_1G046070/CsaV3_6G048680/CsaV3_4G008960	25	20	CsaV3_6G049050/CsaV3_3G010470/CsaV3_7G022930/CsaV3_6G040390/CsaV3_2G013320/CsaV3_5G036470/CsaV3_6G040340/CsaV3_2G001570/CsaV3_7G031080/CsaV3_5G034810/CsaV3_3G007170/CsaV3_3G021780/CsaV3_4G037690/CsaV3_1G005960/CsaV3_2G028640/CsaV3_6G040430/CsaV3_3G046570/CsaV3_5G028690/CsaV3_1G046070/CsaV3_6G048680	5	CsaV3_6G048080/CsaV3_3G023460/CsaV3_7G021470/CsaV3_4G004200/CsaV3_4G008960
BP	GO:0009259	ribonucleotide metabolic process	25/1218	68/5833	0.00178881	0.0116699	CsaV3_6G049050/CsaV3_3G010470/CsaV3_7G022930/CsaV3_6G040390/CsaV3_2G013320/CsaV3_5G036470/CsaV3_6G040340/CsaV3_2G001570/CsaV3_7G031080/CsaV3_6G048080/CsaV3_3G023460/CsaV3_5G034810/CsaV3_7G021470/CsaV3_3G007170/CsaV3_4G004200/CsaV3_3G021780/CsaV3_4G037690/CsaV3_1G005960/CsaV3_2G028640/CsaV3_6G040430/CsaV3_3G046570/CsaV3_5G028690/CsaV3_1G046070/CsaV3_6G048680/CsaV3_4G008960	CsaV3_6G049050/CsaV3_3G010470/CsaV3_7G022930/CsaV3_6G040390/CsaV3_2G013320/CsaV3_5G036470/CsaV3_6G040340/CsaV3_2G001570/CsaV3_7G031080/CsaV3_6G048080/CsaV3_3G023460/CsaV3_5G034810/CsaV3_7G021470/CsaV3_3G007170/CsaV3_4G004200/CsaV3_3G021780/CsaV3_4G037690/CsaV3_1G005960/CsaV3_2G028640/CsaV3_6G040430/CsaV3_3G046570/CsaV3_5G028690/CsaV3_1G046070/CsaV3_6G048680/CsaV3_4G008960	25	20	CsaV3_6G049050/CsaV3_3G010470/CsaV3_7G022930/CsaV3_6G040390/CsaV3_2G013320/CsaV3_5G036470/CsaV3_6G040340/CsaV3_2G001570/CsaV3_7G031080/CsaV3_5G034810/CsaV3_3G007170/CsaV3_3G021780/CsaV3_4G037690/CsaV3_1G005960/CsaV3_2G028640/CsaV3_6G040430/CsaV3_3G046570/CsaV3_5G028690/CsaV3_1G046070/CsaV3_6G048680	5	CsaV3_6G048080/CsaV3_3G023460/CsaV3_7G021470/CsaV3_4G004200/CsaV3_4G008960
BP	GO:0051186	cofactor metabolic process	31/1218	90/5833	0.00184596	0.0118545	CsaV3_6G036910/CsaV3_7G022930/CsaV3_6G051460/CsaV3_6G040390/CsaV3_2G013320/CsaV3_5G034910/CsaV3_6G040340/CsaV3_2G004240/CsaV3_6G048080/CsaV3_3G023460/CsaV3_1G042270/CsaV3_1G000080/CsaV3_5G028490/CsaV3_1G043160/CsaV3_3G033790/CsaV3_5G038830/CsaV3_7G021470/CsaV3_1G030090/CsaV3_4G004200/CsaV3_3G021780/CsaV3_6G004170/CsaV3_4G037690/CsaV3_7G030190/CsaV3_2G028640/CsaV3_6G040430/CsaV3_5G010770/CsaV3_1G0…	CsaV3_6G036910/CsaV3_7G022930/CsaV3_6G051460/CsaV3_6G040390/CsaV3_2G013320/CsaV3_5G034910/CsaV3_6G040340/CsaV3_2G004240/CsaV3_6G048080/CsaV3_3G023460/CsaV3_1G042270/CsaV3_1G000080/CsaV3_5G028490/CsaV3_1G043160/CsaV3_3G033790/CsaV3_5G038830/CsaV3_7G021470/CsaV3_1G030090/CsaV3_4G004200/CsaV3_3G021780/CsaV3_6G004170/CsaV3_4G037690/CsaV3_7G030190/CsaV3_2G028640/CsaV3_6G040430/CsaV3_5G010770/CsaV3_1G0…	31	20	CsaV3_7G022930/CsaV3_6G051460/CsaV3_6G040390/CsaV3_2G013320/CsaV3_6G040340/CsaV3_2G004240/CsaV3_1G042270/CsaV3_1G000080/CsaV3_5G028490/CsaV3_1G043160/CsaV3_5G038830/CsaV3_3G021780/CsaV3_4G037690/CsaV3_2G028640/CsaV3_6G040430/CsaV3_5G010770/CsaV3_1G037750/CsaV3_5G028690/CsaV3_1G046070/CsaV3_6G048680	11	CsaV3_6G036910/CsaV3_5G034910/CsaV3_6G048080/CsaV3_3G023460/CsaV3_3G033790/CsaV3_7G021470/CsaV3_1G030090/CsaV3_4G004200/CsaV3_6G004170/CsaV3_7G030190/CsaV3_4G008960
BP	GO:0072330	monocarboxylic acid biosynthetic process	24/1218	65/5833	0.00204978	0.0129609	CsaV3_6G036910/CsaV3_7G022930/CsaV3_6G040390/CsaV3_2G013320/CsaV3_3G010290/CsaV3_6G006560/CsaV3_6G040340/CsaV3_1G029420/CsaV3_6G048080/CsaV3_3G023460/CsaV3_5G002520/CsaV3_7G021470/CsaV3_5G034300/CsaV3_4G004200/CsaV3_3G016490/CsaV3_3G021780/CsaV3_4G037690/CsaV3_2G028640/CsaV3_6G040430/CsaV3_5G028690/CsaV3_1G046070/CsaV3_1G033910/CsaV3_6G048680/CsaV3_4G008960	CsaV3_6G036910/CsaV3_7G022930/CsaV3_6G040390/CsaV3_2G013320/CsaV3_3G010290/CsaV3_6G006560/CsaV3_6G040340/CsaV3_1G029420/CsaV3_6G048080/CsaV3_3G023460/CsaV3_5G002520/CsaV3_7G021470/CsaV3_5G034300/CsaV3_4G004200/CsaV3_3G016490/CsaV3_3G021780/CsaV3_4G037690/CsaV3_2G028640/CsaV3_6G040430/CsaV3_5G028690/CsaV3_1G046070/CsaV3_1G033910/CsaV3_6G048680/CsaV3_4G008960	24	15	CsaV3_7G022930/CsaV3_6G040390/CsaV3_2G013320/CsaV3_3G010290/CsaV3_6G006560/CsaV3_6G040340/CsaV3_5G002520/CsaV3_3G021780/CsaV3_4G037690/CsaV3_2G028640/CsaV3_6G040430/CsaV3_5G028690/CsaV3_1G046070/CsaV3_1G033910/CsaV3_6G048680	9	CsaV3_6G036910/CsaV3_1G029420/CsaV3_6G048080/CsaV3_3G023460/CsaV3_7G021470/CsaV3_5G034300/CsaV3_4G004200/CsaV3_3G016490/CsaV3_4G008960
BP	GO:0006081	cellular aldehyde metabolic process	7/1218	1436805	0.00253596	0.0157921	CsaV3_5G034910/CsaV3_2G004240/CsaV3_5G028490/CsaV3_3G033790/CsaV3_5G038830/CsaV3_1G009520/CsaV3_1G037750	CsaV3_5G034910/CsaV3_2G004240/CsaV3_5G028490/CsaV3_3G033790/CsaV3_5G038830/CsaV3_1G009520/CsaV3_1G037750	7	4	CsaV3_2G004240/CsaV3_5G028490/CsaV3_5G038830/CsaV3_1G037750	3	CsaV3_5G034910/CsaV3_3G033790/CsaV3_1G009520
BP	GO:0051188	cofactor biosynthetic process	23/1218	64/5833	0.00375592	0.02304	CsaV3_6G036910/CsaV3_7G022930/CsaV3_6G051460/CsaV3_6G040390/CsaV3_2G013320/CsaV3_6G040340/CsaV3_6G048080/CsaV3_3G023460/CsaV3_1G042270/CsaV3_1G000080/CsaV3_1G043160/CsaV3_3G033790/CsaV3_7G021470/CsaV3_4G004200/CsaV3_3G021780/CsaV3_4G037690/CsaV3_2G028640/CsaV3_6G040430/CsaV3_5G010770/CsaV3_5G028690/CsaV3_1G046070/CsaV3_6G048680/CsaV3_4G008960	CsaV3_6G036910/CsaV3_7G022930/CsaV3_6G051460/CsaV3_6G040390/CsaV3_2G013320/CsaV3_6G040340/CsaV3_6G048080/CsaV3_3G023460/CsaV3_1G042270/CsaV3_1G000080/CsaV3_1G043160/CsaV3_3G033790/CsaV3_7G021470/CsaV3_4G004200/CsaV3_3G021780/CsaV3_4G037690/CsaV3_2G028640/CsaV3_6G040430/CsaV3_5G010770/CsaV3_5G028690/CsaV3_1G046070/CsaV3_6G048680/CsaV3_4G008960	23	16	CsaV3_7G022930/CsaV3_6G051460/CsaV3_6G040390/CsaV3_2G013320/CsaV3_6G040340/CsaV3_1G042270/CsaV3_1G000080/CsaV3_1G043160/CsaV3_3G021780/CsaV3_4G037690/CsaV3_2G028640/CsaV3_6G040430/CsaV3_5G010770/CsaV3_5G028690/CsaV3_1G046070/CsaV3_6G048680	7	CsaV3_6G036910/CsaV3_6G048080/CsaV3_3G023460/CsaV3_3G033790/CsaV3_7G021470/CsaV3_4G004200/CsaV3_4G008960
BP	GO:0090407	organophosphate biosynthetic process	32/1218	98/5833	0.0041015	0.0247899	CsaV3_6G049050/CsaV3_3G010470/CsaV3_7G022930/CsaV3_6G053210/CsaV3_6G040390/CsaV3_2G013320/CsaV3_5G036470/CsaV3_6G040340/CsaV3_2G001570/CsaV3_7G031080/CsaV3_6G048080/CsaV3_3G023460/CsaV3_5G034810/CsaV3_4G004810/CsaV3_3G033790/CsaV3_7G021470/CsaV3_3G007170/CsaV3_4G004200/CsaV3_3G021780/CsaV3_3G001560/CsaV3_4G037690/CsaV3_5G034740/CsaV3_1G005960/CsaV3_2G028640/CsaV3_6G040430/CsaV3_5G028690/CsaV3_1G0…	CsaV3_6G049050/CsaV3_3G010470/CsaV3_7G022930/CsaV3_6G053210/CsaV3_6G040390/CsaV3_2G013320/CsaV3_5G036470/CsaV3_6G040340/CsaV3_2G001570/CsaV3_7G031080/CsaV3_6G048080/CsaV3_3G023460/CsaV3_5G034810/CsaV3_4G004810/CsaV3_3G033790/CsaV3_7G021470/CsaV3_3G007170/CsaV3_4G004200/CsaV3_3G021780/CsaV3_3G001560/CsaV3_4G037690/CsaV3_5G034740/CsaV3_1G005960/CsaV3_2G028640/CsaV3_6G040430/CsaV3_5G028690/CsaV3_1G0…	32	22	CsaV3_6G049050/CsaV3_3G010470/CsaV3_7G022930/CsaV3_6G053210/CsaV3_6G040390/CsaV3_2G013320/CsaV3_5G036470/CsaV3_6G040340/CsaV3_2G001570/CsaV3_7G031080/CsaV3_5G034810/CsaV3_4G004810/CsaV3_3G007170/CsaV3_3G021780/CsaV3_4G037690/CsaV3_1G005960/CsaV3_2G028640/CsaV3_6G040430/CsaV3_5G028690/CsaV3_1G046070/CsaV3_1G010170/CsaV3_6G048680	10	CsaV3_6G048080/CsaV3_3G023460/CsaV3_3G033790/CsaV3_7G021470/CsaV3_4G004200/CsaV3_3G001560/CsaV3_5G034740/CsaV3_1G016970/CsaV3_4G022060/CsaV3_4G008960
BP	GO:0009108	coenzyme biosynthetic process	20/1218	54/5833	0.00451225	0.0268773	CsaV3_6G036910/CsaV3_7G022930/CsaV3_6G051460/CsaV3_6G040390/CsaV3_2G013320/CsaV3_6G040340/CsaV3_6G048080/CsaV3_3G023460/CsaV3_1G042270/CsaV3_3G033790/CsaV3_7G021470/CsaV3_4G004200/CsaV3_3G021780/CsaV3_4G037690/CsaV3_2G028640/CsaV3_6G040430/CsaV3_5G028690/CsaV3_1G046070/CsaV3_6G048680/CsaV3_4G008960	CsaV3_6G036910/CsaV3_7G022930/CsaV3_6G051460/CsaV3_6G040390/CsaV3_2G013320/CsaV3_6G040340/CsaV3_6G048080/CsaV3_3G023460/CsaV3_1G042270/CsaV3_3G033790/CsaV3_7G021470/CsaV3_4G004200/CsaV3_3G021780/CsaV3_4G037690/CsaV3_2G028640/CsaV3_6G040430/CsaV3_5G028690/CsaV3_1G046070/CsaV3_6G048680/CsaV3_4G008960	20	13	CsaV3_7G022930/CsaV3_6G051460/CsaV3_6G040390/CsaV3_2G013320/CsaV3_6G040340/CsaV3_1G042270/CsaV3_3G021780/CsaV3_4G037690/CsaV3_2G028640/CsaV3_6G040430/CsaV3_5G028690/CsaV3_1G046070/CsaV3_6G048680	7	CsaV3_6G036910/CsaV3_6G048080/CsaV3_3G023460/CsaV3_3G033790/CsaV3_7G021470/CsaV3_4G004200/CsaV3_4G008960
BP	GO:1901575	organic substance catabolic process	41/1218	135/5833	0.00552736	0.0324535	CsaV3_7G022930/CsaV3_6G040390/CsaV3_2G013320/CsaV3_4G032560/CsaV3_6G040340/CsaV3_3G002150/CsaV3_5G024850/CsaV3_6G000490/CsaV3_UNG200520/CsaV3_6G048080/CsaV3_3G023460/CsaV3_UNG214460/CsaV3_3G011520/CsaV3_5G004710/CsaV3_7G018280/CsaV3_6G047290/CsaV3_4G013550/CsaV3_7G021470/CsaV3_3G030770/CsaV3_1G030090/CsaV3_4G004200/CsaV3_7G008290/CsaV3_2G012230/CsaV3_3G019900/CsaV3_6G032330/CsaV3_3G021780/CsaV3_4…	CsaV3_7G022930/CsaV3_6G040390/CsaV3_2G013320/CsaV3_4G032560/CsaV3_6G040340/CsaV3_3G002150/CsaV3_5G024850/CsaV3_6G000490/CsaV3_UNG200520/CsaV3_6G048080/CsaV3_3G023460/CsaV3_UNG214460/CsaV3_3G011520/CsaV3_5G004710/CsaV3_7G018280/CsaV3_6G047290/CsaV3_4G013550/CsaV3_7G021470/CsaV3_3G030770/CsaV3_1G030090/CsaV3_4G004200/CsaV3_7G008290/CsaV3_2G012230/CsaV3_3G019900/CsaV3_6G032330/CsaV3_3G021780/CsaV3_4…	41	23	CsaV3_7G022930/CsaV3_6G040390/CsaV3_2G013320/CsaV3_4G032560/CsaV3_6G040340/CsaV3_3G002150/CsaV3_6G047290/CsaV3_4G013550/CsaV3_7G008290/CsaV3_6G032330/CsaV3_3G021780/CsaV3_4G037690/CsaV3_UNG137080/CsaV3_2G028640/CsaV3_3G009670/CsaV3_4G007080/CsaV3_6G040430/CsaV3_2G024370/CsaV3_6G007200/CsaV3_5G028690/CsaV3_6G001760/CsaV3_1G046070/CsaV3_6G048680	18	CsaV3_5G024850/CsaV3_6G000490/CsaV3_UNG200520/CsaV3_6G048080/CsaV3_3G023460/CsaV3_UNG214460/CsaV3_3G011520/CsaV3_5G004710/CsaV3_7G018280/CsaV3_7G021470/CsaV3_3G030770/CsaV3_1G030090/CsaV3_4G004200/CsaV3_2G012230/CsaV3_3G019900/CsaV3_5G001180/CsaV3_3G041900/CsaV3_4G008960
BP	GO:0009056	catabolic process	42/1218	140/5833	0.00636585	0.0368502	CsaV3_7G022930/CsaV3_6G040390/CsaV3_2G013320/CsaV3_4G032560/CsaV3_6G040340/CsaV3_3G002150/CsaV3_5G024850/CsaV3_6G000490/CsaV3_UNG200520/CsaV3_6G048080/CsaV3_3G023460/CsaV3_UNG214460/CsaV3_3G011520/CsaV3_5G004710/CsaV3_7G018280/CsaV3_6G047290/CsaV3_4G013550/CsaV3_7G021470/CsaV3_3G030770/CsaV3_1G030090/CsaV3_4G004200/CsaV3_7G008290/CsaV3_3G018020/CsaV3_2G012230/CsaV3_3G019900/CsaV3_6G032330/CsaV3_3…	CsaV3_7G022930/CsaV3_6G040390/CsaV3_2G013320/CsaV3_4G032560/CsaV3_6G040340/CsaV3_3G002150/CsaV3_5G024850/CsaV3_6G000490/CsaV3_UNG200520/CsaV3_6G048080/CsaV3_3G023460/CsaV3_UNG214460/CsaV3_3G011520/CsaV3_5G004710/CsaV3_7G018280/CsaV3_6G047290/CsaV3_4G013550/CsaV3_7G021470/CsaV3_3G030770/CsaV3_1G030090/CsaV3_4G004200/CsaV3_7G008290/CsaV3_3G018020/CsaV3_2G012230/CsaV3_3G019900/CsaV3_6G032330/CsaV3_3…	42	23	CsaV3_7G022930/CsaV3_6G040390/CsaV3_2G013320/CsaV3_4G032560/CsaV3_6G040340/CsaV3_3G002150/CsaV3_6G047290/CsaV3_4G013550/CsaV3_7G008290/CsaV3_6G032330/CsaV3_3G021780/CsaV3_4G037690/CsaV3_UNG137080/CsaV3_2G028640/CsaV3_3G009670/CsaV3_4G007080/CsaV3_6G040430/CsaV3_2G024370/CsaV3_6G007200/CsaV3_5G028690/CsaV3_6G001760/CsaV3_1G046070/CsaV3_6G048680	19	CsaV3_5G024850/CsaV3_6G000490/CsaV3_UNG200520/CsaV3_6G048080/CsaV3_3G023460/CsaV3_UNG214460/CsaV3_3G011520/CsaV3_5G004710/CsaV3_7G018280/CsaV3_7G021470/CsaV3_3G030770/CsaV3_1G030090/CsaV3_4G004200/CsaV3_3G018020/CsaV3_2G012230/CsaV3_3G019900/CsaV3_5G001180/CsaV3_3G041900/CsaV3_4G008960
BP	GO:0015979	photosynthesis	16/1218	43/5833	0.0100506	0.0573721	CsaV3_1G040810/CsaV3_3G013420/CsaV3_2G010090/CsaV3_2G009680/CsaV3_6G041600/CsaV3_6G052210/CsaV3_7G004300/CsaV3_4G007600/CsaV3_1G011330/CsaV3_7G027520/CsaV3_1G046680/CsaV3_5G030690/CsaV3_3G004330/CsaV3_6G042680/CsaV3_4G026390/CsaV3_1G025480	CsaV3_1G040810/CsaV3_3G013420/CsaV3_2G010090/CsaV3_2G009680/CsaV3_6G041600/CsaV3_6G052210/CsaV3_7G004300/CsaV3_4G007600/CsaV3_1G011330/CsaV3_7G027520/CsaV3_1G046680/CsaV3_5G030690/CsaV3_3G004330/CsaV3_6G042680/CsaV3_4G026390/CsaV3_1G025480	16	14	CsaV3_1G040810/CsaV3_3G013420/CsaV3_2G010090/CsaV3_2G009680/CsaV3_6G041600/CsaV3_6G052210/CsaV3_7G004300/CsaV3_4G007600/CsaV3_1G011330/CsaV3_7G027520/CsaV3_1G046680/CsaV3_5G030690/CsaV3_3G004330/CsaV3_6G042680	2	CsaV3_4G026390/CsaV3_1G025480
CC	GO:0009522	photosystem I	7/413	13/2095	0.00628168	0.423603	CsaV3_3G013420/CsaV3_2G010090/CsaV3_2G009680/CsaV3_6G041600/CsaV3_6G052210/CsaV3_1G046680/CsaV3_3G004330	CsaV3_3G013420/CsaV3_2G010090/CsaV3_2G009680/CsaV3_6G041600/CsaV3_6G052210/CsaV3_1G046680/CsaV3_3G004330	7	7	CsaV3_3G013420/CsaV3_2G010090/CsaV3_2G009680/CsaV3_6G041600/CsaV3_6G052210/CsaV3_1G046680/CsaV3_3G004330	0
CC	GO:0045259	proton-transporting ATP synthase complex	6/413	71559	0.017808	0.423603	CsaV3_6G049050/CsaV3_3G010470/CsaV3_5G036470/CsaV3_2G001570/CsaV3_5G034810/CsaV3_1G005960	CsaV3_6G049050/CsaV3_3G010470/CsaV3_5G036470/CsaV3_2G001570/CsaV3_5G034810/CsaV3_1G005960	6	6	CsaV3_6G049050/CsaV3_3G010470/CsaV3_5G036470/CsaV3_2G001570/CsaV3_5G034810/CsaV3_1G005960	0
CC	GO:0009521	photosystem	13/413	37/2095	0.0196447	0.423603	CsaV3_1G040810/CsaV3_3G013420/CsaV3_2G010090/CsaV3_2G009680/CsaV3_6G041600/CsaV3_6G052210/CsaV3_4G007600/CsaV3_1G011330/CsaV3_7G027520/CsaV3_1G046680/CsaV3_5G030690/CsaV3_3G004330/CsaV3_6G042680	CsaV3_1G040810/CsaV3_3G013420/CsaV3_2G010090/CsaV3_2G009680/CsaV3_6G041600/CsaV3_6G052210/CsaV3_4G007600/CsaV3_1G011330/CsaV3_7G027520/CsaV3_1G046680/CsaV3_5G030690/CsaV3_3G004330/CsaV3_6G042680	13	13	CsaV3_1G040810/CsaV3_3G013420/CsaV3_2G010090/CsaV3_2G009680/CsaV3_6G041600/CsaV3_6G052210/CsaV3_4G007600/CsaV3_1G011330/CsaV3_7G027520/CsaV3_1G046680/CsaV3_5G030690/CsaV3_3G004330/CsaV3_6G042680	0
CC	GO:0009579	thylakoid	13/413	38/2095	0.0246759	0.423603	CsaV3_1G040810/CsaV3_3G013420/CsaV3_2G010090/CsaV3_2G009680/CsaV3_6G041600/CsaV3_6G052210/CsaV3_4G007600/CsaV3_1G011330/CsaV3_7G027520/CsaV3_1G046680/CsaV3_5G030690/CsaV3_3G004330/CsaV3_6G042680	CsaV3_1G040810/CsaV3_3G013420/CsaV3_2G010090/CsaV3_2G009680/CsaV3_6G041600/CsaV3_6G052210/CsaV3_4G007600/CsaV3_1G011330/CsaV3_7G027520/CsaV3_1G046680/CsaV3_5G030690/CsaV3_3G004330/CsaV3_6G042680	13	13	CsaV3_1G040810/CsaV3_3G013420/CsaV3_2G010090/CsaV3_2G009680/CsaV3_6G041600/CsaV3_6G052210/CsaV3_4G007600/CsaV3_1G011330/CsaV3_7G027520/CsaV3_1G046680/CsaV3_5G030690/CsaV3_3G004330/CsaV3_6G042680	0
CC	GO:0034357	photosynthetic membrane	13/413	38/2095	0.0246759	0.423603	CsaV3_1G040810/CsaV3_3G013420/CsaV3_2G010090/CsaV3_2G009680/CsaV3_6G041600/CsaV3_6G052210/CsaV3_4G007600/CsaV3_1G011330/CsaV3_7G027520/CsaV3_1G046680/CsaV3_5G030690/CsaV3_3G004330/CsaV3_6G042680	CsaV3_1G040810/CsaV3_3G013420/CsaV3_2G010090/CsaV3_2G009680/CsaV3_6G041600/CsaV3_6G052210/CsaV3_4G007600/CsaV3_1G011330/CsaV3_7G027520/CsaV3_1G046680/CsaV3_5G030690/CsaV3_3G004330/CsaV3_6G042680	13	13	CsaV3_1G040810/CsaV3_3G013420/CsaV3_2G010090/CsaV3_2G009680/CsaV3_6G041600/CsaV3_6G052210/CsaV3_4G007600/CsaV3_1G011330/CsaV3_7G027520/CsaV3_1G046680/CsaV3_5G030690/CsaV3_3G004330/CsaV3_6G042680	0
CC	GO:0044436	thylakoid part	13/413	38/2095	0.0246759	0.423603	CsaV3_1G040810/CsaV3_3G013420/CsaV3_2G010090/CsaV3_2G009680/CsaV3_6G041600/CsaV3_6G052210/CsaV3_4G007600/CsaV3_1G011330/CsaV3_7G027520/CsaV3_1G046680/CsaV3_5G030690/CsaV3_3G004330/CsaV3_6G042680	CsaV3_1G040810/CsaV3_3G013420/CsaV3_2G010090/CsaV3_2G009680/CsaV3_6G041600/CsaV3_6G052210/CsaV3_4G007600/CsaV3_1G011330/CsaV3_7G027520/CsaV3_1G046680/CsaV3_5G030690/CsaV3_3G004330/CsaV3_6G042680	13	13	CsaV3_1G040810/CsaV3_3G013420/CsaV3_2G010090/CsaV3_2G009680/CsaV3_6G041600/CsaV3_6G052210/CsaV3_4G007600/CsaV3_1G011330/CsaV3_7G027520/CsaV3_1G046680/CsaV3_5G030690/CsaV3_3G004330/CsaV3_6G042680	0
CC	GO:0016469	proton-transporting two-sector ATPase complex	10/413	28/2095	0.034719	0.510865	CsaV3_6G049050/CsaV3_3G010470/CsaV3_2G029310/CsaV3_5G036470/CsaV3_2G001570/CsaV3_5G034810/CsaV3_3G046610/CsaV3_3G010990/CsaV3_2G029320/CsaV3_1G005960	CsaV3_6G049050/CsaV3_3G010470/CsaV3_2G029310/CsaV3_5G036470/CsaV3_2G001570/CsaV3_5G034810/CsaV3_3G046610/CsaV3_3G010990/CsaV3_2G029320/CsaV3_1G005960	10	10	CsaV3_6G049050/CsaV3_3G010470/CsaV3_2G029310/CsaV3_5G036470/CsaV3_2G001570/CsaV3_5G034810/CsaV3_3G046610/CsaV3_3G010990/CsaV3_2G029320/CsaV3_1G005960	0
CC	GO:0033177	proton-transporting two-sector ATPase complex, proton-transporting domain	6/413	14/2095	0.0406038	0.522774	CsaV3_2G029310/CsaV3_5G036470/CsaV3_2G001570/CsaV3_3G046610/CsaV3_3G010990/CsaV3_2G029320	CsaV3_2G029310/CsaV3_5G036470/CsaV3_2G001570/CsaV3_3G046610/CsaV3_3G010990/CsaV3_2G029320	6	6	CsaV3_2G029310/CsaV3_5G036470/CsaV3_2G001570/CsaV3_3G046610/CsaV3_3G010990/CsaV3_2G029320	0
MF	GO:0016860	intramolecular oxidoreductase activity	9/1748	14/8727	0.000381753	0.105364	CsaV3_4G031770/CsaV3_5G034910/CsaV3_2G004240/CsaV3_6G051910/CsaV3_4G002070/CsaV3_5G028490/CsaV3_2G015690/CsaV3_2G028640/CsaV3_1G037750	CsaV3_4G031770/CsaV3_5G034910/CsaV3_2G004240/CsaV3_6G051910/CsaV3_4G002070/CsaV3_5G028490/CsaV3_2G015690/CsaV3_2G028640/CsaV3_1G037750	9	8	CsaV3_4G031770/CsaV3_2G004240/CsaV3_6G051910/CsaV3_4G002070/CsaV3_5G028490/CsaV3_2G015690/CsaV3_2G028640/CsaV3_1G037750	1	CsaV3_5G034910
MF	GO:0016861	intramolecular oxidoreductase activity, interconverting aldoses and ketoses	7/1748	2493846	0.00391246	0.539919	CsaV3_4G031770/CsaV3_5G034910/CsaV3_2G004240/CsaV3_5G028490/CsaV3_2G015690/CsaV3_2G028640/CsaV3_1G037750	CsaV3_4G031770/CsaV3_5G034910/CsaV3_2G004240/CsaV3_5G028490/CsaV3_2G015690/CsaV3_2G028640/CsaV3_1G037750	7	6	CsaV3_4G031770/CsaV3_2G004240/CsaV3_5G028490/CsaV3_2G015690/CsaV3_2G028640/CsaV3_1G037750	1	CsaV3_5G034910
MF	GO:0004650	polygalacturonase activity	11/1748	27/8727	0.0109817	0.632555	CsaV3_7G031000/CsaV3_3G039110/CsaV3_3G031630/CsaV3_1G041240/CsaV3_2G024660/CsaV3_5G031360/CsaV3_5G031490/CsaV3_2G019390/CsaV3_3G006470/CsaV3_1G043310/CsaV3_5G001070	CsaV3_7G031000/CsaV3_3G039110/CsaV3_3G031630/CsaV3_1G041240/CsaV3_2G024660/CsaV3_5G031360/CsaV3_5G031490/CsaV3_2G019390/CsaV3_3G006470/CsaV3_1G043310/CsaV3_5G001070	11	6	CsaV3_3G039110/CsaV3_3G031630/CsaV3_1G041240/CsaV3_2G024660/CsaV3_5G031490/CsaV3_5G001070	5	CsaV3_7G031000/CsaV3_5G031360/CsaV3_2G019390/CsaV3_3G006470/CsaV3_1G043310
MF	GO:0005509	calcium ion binding	35/1748	121/8727	0.011739	0.632555	CsaV3_1G000650/CsaV3_3G040820/CsaV3_1G011330/CsaV3_4G028540/CsaV3_5G038130/CsaV3_2G006990/CsaV3_3G005500/CsaV3_2G027950/CsaV3_4G027710/CsaV3_1G014860/CsaV3_1G005550/CsaV3_3G015240/CsaV3_3G049770/CsaV3_3G044850/CsaV3_4G008930/CsaV3_2G003130/CsaV3_2G019610/CsaV3_6G008810/CsaV3_5G035130/CsaV3_7G008650/CsaV3_4G011890/CsaV3_6G008990/CsaV3_6G042680/CsaV3_3G003160/CsaV3_5G036620/CsaV3_3G033720/CsaV3_1G0…	CsaV3_1G000650/CsaV3_3G040820/CsaV3_1G011330/CsaV3_4G028540/CsaV3_5G038130/CsaV3_2G006990/CsaV3_3G005500/CsaV3_2G027950/CsaV3_4G027710/CsaV3_1G014860/CsaV3_1G005550/CsaV3_3G015240/CsaV3_3G049770/CsaV3_3G044850/CsaV3_4G008930/CsaV3_2G003130/CsaV3_2G019610/CsaV3_6G008810/CsaV3_5G035130/CsaV3_7G008650/CsaV3_4G011890/CsaV3_6G008990/CsaV3_6G042680/CsaV3_3G003160/CsaV3_5G036620/CsaV3_3G033720/CsaV3_1G0…	35	18	CsaV3_1G011330/CsaV3_4G028540/CsaV3_2G006990/CsaV3_2G027950/CsaV3_1G005550/CsaV3_3G015240/CsaV3_4G008930/CsaV3_2G019610/CsaV3_7G008650/CsaV3_6G042680/CsaV3_3G003160/CsaV3_5G036620/CsaV3_3G033720/CsaV3_1G009950/CsaV3_4G002420/CsaV3_5G036610/CsaV3_1G041870/CsaV3_6G034010	17	CsaV3_1G000650/CsaV3_3G040820/CsaV3_5G038130/CsaV3_3G005500/CsaV3_4G027710/CsaV3_1G014860/CsaV3_3G049770/CsaV3_3G044850/CsaV3_2G003130/CsaV3_6G008810/CsaV3_5G035130/CsaV3_4G011890/CsaV3_6G008990/CsaV3_1G004290/CsaV3_5G033780/CsaV3_4G002860/CsaV3_6G006120
MF	GO:0051082	unfolded protein binding	12/1748	32/8727	0.0167308	0.632555	CsaV3_2G006990/CsaV3_3G017480/CsaV3_3G033760/CsaV3_1G009950/CsaV3_1G044020/CsaV3_2G029630/CsaV3_4G002420/CsaV3_3G046470/CsaV3_4G008850/CsaV3_7G031320/CsaV3_1G007990/CsaV3_5G018740	CsaV3_2G006990/CsaV3_3G017480/CsaV3_3G033760/CsaV3_1G009950/CsaV3_1G044020/CsaV3_2G029630/CsaV3_4G002420/CsaV3_3G046470/CsaV3_4G008850/CsaV3_7G031320/CsaV3_1G007990/CsaV3_5G018740	12	6	CsaV3_2G006990/CsaV3_3G033760/CsaV3_1G009950/CsaV3_2G029630/CsaV3_4G002420/CsaV3_3G046470	6	CsaV3_3G017480/CsaV3_1G044020/CsaV3_4G008850/CsaV3_7G031320/CsaV3_1G007990/CsaV3_5G018740
MF	GO:0016835	carbon-oxygen lyase activity	16/1748	47/8727	0.0170965	0.632555	CsaV3_6G051460/CsaV3_6G040390/CsaV3_3G005760/CsaV3_1G007900/CsaV3_2G030320/CsaV3_3G043270/CsaV3_5G031570/CsaV3_3G005740/CsaV3_6G036360/CsaV3_2G033150/CsaV3_2G017870/CsaV3_7G023060/CsaV3_5G032410/CsaV3_1G011410/CsaV3_2G028140/CsaV3_3G003670	CsaV3_6G051460/CsaV3_6G040390/CsaV3_3G005760/CsaV3_1G007900/CsaV3_2G030320/CsaV3_3G043270/CsaV3_5G031570/CsaV3_3G005740/CsaV3_6G036360/CsaV3_2G033150/CsaV3_2G017870/CsaV3_7G023060/CsaV3_5G032410/CsaV3_1G011410/CsaV3_2G028140/CsaV3_3G003670	16	7	CsaV3_6G051460/CsaV3_6G040390/CsaV3_3G005760/CsaV3_1G007900/CsaV3_3G043270/CsaV3_3G005740/CsaV3_3G003670	9	CsaV3_2G030320/CsaV3_5G031570/CsaV3_6G036360/CsaV3_2G033150/CsaV3_2G017870/CsaV3_7G023060/CsaV3_5G032410/CsaV3_1G011410/CsaV3_2G028140
MF	GO:0030234	enzyme regulator activity	29/1748	100/8727	0.0197993	0.632555	CsaV3_2G018180/CsaV3_6G006710/CsaV3_2G005010/CsaV3_7G026200/CsaV3_5G028280/CsaV3_1G005300/CsaV3_1G038650/novel.1124/CsaV3_1G037330/CsaV3_5G015210/CsaV3_6G006700/novel.1121/CsaV3_7G029590/CsaV3_2G018190/CsaV3_3G044370/CsaV3_3G011030/CsaV3_5G003890/CsaV3_6G052350/CsaV3_7G002870/CsaV3_3G012540/CsaV3_3G047910/CsaV3_1G017230/CsaV3_3G009850/CsaV3_1G044180/CsaV3_3G004810/CsaV3_6G049200/CsaV3_7G029580/Cs…	CsaV3_2G018180/CsaV3_6G006710/CsaV3_2G005010/CsaV3_7G026200/CsaV3_5G028280/CsaV3_1G005300/CsaV3_1G038650/-/CsaV3_1G037330/CsaV3_5G015210/CsaV3_6G006700/-/CsaV3_7G029590/CsaV3_2G018190/CsaV3_3G044370/CsaV3_3G011030/CsaV3_5G003890/CsaV3_6G052350/CsaV3_7G002870/CsaV3_3G012540/CsaV3_3G047910/CsaV3_1G017230/CsaV3_3G009850/CsaV3_1G044180/CsaV3_3G004810/CsaV3_6G049200/CsaV3_7G029580/CsaV3_5G036680/CsaV3…	29	15	CsaV3_2G018180/CsaV3_6G006710/CsaV3_7G026200/CsaV3_5G028280/CsaV3_1G038650/CsaV3_1G037330/CsaV3_6G006700/CsaV3_7G029590/CsaV3_2G018190/CsaV3_5G003890/CsaV3_3G012540/CsaV3_3G047910/CsaV3_6G049200/CsaV3_7G029580/CsaV3_3G000440	14	CsaV3_2G005010/CsaV3_1G005300/novel.1124/CsaV3_5G015210/novel.1121/CsaV3_3G044370/CsaV3_3G011030/CsaV3_6G052350/CsaV3_7G002870/CsaV3_1G017230/CsaV3_3G009850/CsaV3_1G044180/CsaV3_3G004810/CsaV3_5G036680
MF	GO:0000287	magnesium ion binding	16/1748	48/8727	0.0210044	0.632555	CsaV3_6G040390/CsaV3_2G013320/CsaV3_3G005760/CsaV3_6G040340/CsaV3_2G036580/CsaV3_6G003860/CsaV3_4G010390/CsaV3_6G046410/CsaV3_3G005740/CsaV3_3G021780/CsaV3_2G017870/CsaV3_7G023060/CsaV3_1G011410/CsaV3_1G016970/CsaV3_3G003670/CsaV3_6G050730	CsaV3_6G040390/CsaV3_2G013320/CsaV3_3G005760/CsaV3_6G040340/CsaV3_2G036580/CsaV3_6G003860/CsaV3_4G010390/CsaV3_6G046410/CsaV3_3G005740/CsaV3_3G021780/CsaV3_2G017870/CsaV3_7G023060/CsaV3_1G011410/CsaV3_1G016970/CsaV3_3G003670/CsaV3_6G050730	16	11	CsaV3_6G040390/CsaV3_2G013320/CsaV3_3G005760/CsaV3_6G040340/CsaV3_2G036580/CsaV3_4G010390/CsaV3_6G046410/CsaV3_3G005740/CsaV3_3G021780/CsaV3_3G003670/CsaV3_6G050730	5	CsaV3_6G003860/CsaV3_2G017870/CsaV3_7G023060/CsaV3_1G011410/CsaV3_1G016970
MF	GO:0015078	proton transmembrane transporter activity	19/1748	60/8727	0.0220054	0.632555	CsaV3_6G049050/CsaV3_3G010470/CsaV3_2G029310/CsaV3_4G001330/CsaV3_5G036470/CsaV3_2G001570/CsaV3_7G031080/CsaV3_6G003740/CsaV3_3G046610/CsaV3_6G045430/CsaV3_7G018780/CsaV3_3G010990/CsaV3_4G006260/CsaV3_7G007280/CsaV3_2G029320/CsaV3_2G025600/CsaV3_1G005960/CsaV3_1G004730/CsaV3_3G026640	CsaV3_6G049050/CsaV3_3G010470/CsaV3_2G029310/CsaV3_4G001330/CsaV3_5G036470/CsaV3_2G001570/CsaV3_7G031080/CsaV3_6G003740/CsaV3_3G046610/CsaV3_6G045430/CsaV3_7G018780/CsaV3_3G010990/CsaV3_4G006260/CsaV3_7G007280/CsaV3_2G029320/CsaV3_2G025600/CsaV3_1G005960/CsaV3_1G004730/CsaV3_3G026640	19	14	CsaV3_6G049050/CsaV3_3G010470/CsaV3_2G029310/CsaV3_4G001330/CsaV3_5G036470/CsaV3_2G001570/CsaV3_7G031080/CsaV3_3G046610/CsaV3_6G045430/CsaV3_3G010990/CsaV3_2G029320/CsaV3_1G005960/CsaV3_1G004730/CsaV3_3G026640	5	CsaV3_6G003740/CsaV3_7G018780/CsaV3_4G006260/CsaV3_7G007280/CsaV3_2G025600
MF	GO:0016620	oxidoreductase activity, acting on the aldehyde or oxo group of donors, NAD or NADP as acceptor	6/1748	13/8727	0.0301384	0.632555	CsaV3_1G009410/CsaV3_2G030530/CsaV3_6G013490/CsaV3_6G001210/CsaV3_7G022960/CsaV3_6G014930	CsaV3_1G009410/CsaV3_2G030530/CsaV3_6G013490/CsaV3_6G001210/CsaV3_7G022960/CsaV3_6G014930	6	5	CsaV3_1G009410/CsaV3_2G030530/CsaV3_6G013490/CsaV3_6G001210/CsaV3_7G022960	1	CsaV3_6G014930
MF	GO:0016903	oxidoreductase activity, acting on the aldehyde or oxo group of donors	8/1748	20/8727	0.0322443	0.632555	CsaV3_1G009410/CsaV3_2G030530/CsaV3_6G013490/CsaV3_6G001210/CsaV3_7G022960/CsaV3_6G041570/CsaV3_5G026370/CsaV3_6G014930	CsaV3_1G009410/CsaV3_2G030530/CsaV3_6G013490/CsaV3_6G001210/CsaV3_7G022960/CsaV3_6G041570/CsaV3_5G026370/CsaV3_6G014930	8	6	CsaV3_1G009410/CsaV3_2G030530/CsaV3_6G013490/CsaV3_6G001210/CsaV3_7G022960/CsaV3_5G026370	2	CsaV3_6G041570/CsaV3_6G014930
MF	GO:0016829	lyase activity	30/1748	109/8727	0.0359797	0.632555	CsaV3_6G051460/CsaV3_6G040390/CsaV3_3G005760/CsaV3_5G028880/CsaV3_1G007900/CsaV3_2G030320/CsaV3_1G001250/CsaV3_3G043270/CsaV3_3G020560/CsaV3_5G031570/CsaV3_7G021470/CsaV3_6G008140/CsaV3_1G004440/CsaV3_3G005740/CsaV3_6G036360/CsaV3_2G033150/CsaV3_2G017870/CsaV3_7G023060/CsaV3_5G024820/CsaV3_6G003290/CsaV3_6G040430/CsaV3_5G032410/CsaV3_5G010770/CsaV3_1G011410/CsaV3_2G028140/CsaV3_5G028690/CsaV3_3G0…	CsaV3_6G051460/CsaV3_6G040390/CsaV3_3G005760/CsaV3_5G028880/CsaV3_1G007900/CsaV3_2G030320/CsaV3_1G001250/CsaV3_3G043270/CsaV3_3G020560/CsaV3_5G031570/CsaV3_7G021470/CsaV3_6G008140/CsaV3_1G004440/CsaV3_3G005740/CsaV3_6G036360/CsaV3_2G033150/CsaV3_2G017870/CsaV3_7G023060/CsaV3_5G024820/CsaV3_6G003290/CsaV3_6G040430/CsaV3_5G032410/CsaV3_5G010770/CsaV3_1G011410/CsaV3_2G028140/CsaV3_5G028690/CsaV3_3G0…	30	16	CsaV3_6G051460/CsaV3_6G040390/CsaV3_3G005760/CsaV3_5G028880/CsaV3_1G007900/CsaV3_1G001250/CsaV3_3G043270/CsaV3_3G020560/CsaV3_3G005740/CsaV3_5G024820/CsaV3_6G040430/CsaV3_5G010770/CsaV3_5G028690/CsaV3_3G003670/CsaV3_1G005000/CsaV3_3G040320	14	CsaV3_2G030320/CsaV3_5G031570/CsaV3_7G021470/CsaV3_6G008140/CsaV3_1G004440/CsaV3_6G036360/CsaV3_2G033150/CsaV3_2G017870/CsaV3_7G023060/CsaV3_6G003290/CsaV3_5G032410/CsaV3_1G011410/CsaV3_2G028140/CsaV3_1G009930
MF	GO:0015075	ion transmembrane transporter activity	49/1748	192/8727	0.0362903	0.632555	CsaV3_6G049050/CsaV3_3G010470/CsaV3_7G027830/CsaV3_1G030670/CsaV3_2G003210/CsaV3_2G029310/CsaV3_4G001330/CsaV3_7G028990/CsaV3_5G036470/CsaV3_2G035030/CsaV3_1G032180/CsaV3_3G028080/CsaV3_6G008570/CsaV3_2G001570/CsaV3_3G033490/CsaV3_7G031080/CsaV3_6G003740/CsaV3_6G050260/CsaV3_7G007720/CsaV3_4G007780/CsaV3_6G004330/CsaV3_7G001940/CsaV3_3G046610/CsaV3_6G045430/CsaV3_7G018780/CsaV3_3G010990/CsaV3_5G0…	CsaV3_6G049050/CsaV3_3G010470/CsaV3_7G027830/CsaV3_1G030670/CsaV3_2G003210/CsaV3_2G029310/CsaV3_4G001330/CsaV3_7G028990/CsaV3_5G036470/CsaV3_2G035030/CsaV3_1G032180/CsaV3_3G028080/CsaV3_6G008570/CsaV3_2G001570/CsaV3_3G033490/CsaV3_7G031080/CsaV3_6G003740/CsaV3_6G050260/CsaV3_7G007720/CsaV3_4G007780/CsaV3_6G004330/CsaV3_7G001940/CsaV3_3G046610/CsaV3_6G045430/CsaV3_7G018780/CsaV3_3G010990/CsaV3_5G0…	49	35	CsaV3_6G049050/CsaV3_3G010470/CsaV3_7G027830/CsaV3_1G030670/CsaV3_2G003210/CsaV3_2G029310/CsaV3_4G001330/CsaV3_7G028990/CsaV3_5G036470/CsaV3_2G035030/CsaV3_3G028080/CsaV3_6G008570/CsaV3_2G001570/CsaV3_7G031080/CsaV3_6G050260/CsaV3_7G007720/CsaV3_4G007780/CsaV3_6G004330/CsaV3_7G001940/CsaV3_3G046610/CsaV3_6G045430/CsaV3_3G010990/CsaV3_7G033760/CsaV3_4G028730/CsaV3_2G029320/CsaV3_3G046820/CsaV3_1G0…	14	CsaV3_1G032180/CsaV3_3G033490/CsaV3_6G003740/CsaV3_7G018780/CsaV3_5G000590/CsaV3_1G005040/CsaV3_1G010220/CsaV3_3G044000/CsaV3_4G006260/CsaV3_7G007280/CsaV3_7G000830/CsaV3_2G025600/CsaV3_1G043220/CsaV3_2G029180
MF	GO:0008324	cation transmembrane transporter activity	33/1748	122/8727	0.0365109	0.632555	CsaV3_6G049050/CsaV3_3G010470/CsaV3_2G029310/CsaV3_4G001330/CsaV3_7G028990/CsaV3_5G036470/CsaV3_1G032180/CsaV3_2G001570/CsaV3_3G033490/CsaV3_7G031080/CsaV3_6G003740/CsaV3_6G050260/CsaV3_7G007720/CsaV3_3G046610/CsaV3_6G045430/CsaV3_7G018780/CsaV3_3G010990/CsaV3_1G010220/CsaV3_7G033760/CsaV3_4G006260/CsaV3_7G007280/CsaV3_7G000830/CsaV3_2G029320/CsaV3_2G025600/CsaV3_1G005960/CsaV3_1G004730/CsaV3_1G0…	CsaV3_6G049050/CsaV3_3G010470/CsaV3_2G029310/CsaV3_4G001330/CsaV3_7G028990/CsaV3_5G036470/CsaV3_1G032180/CsaV3_2G001570/CsaV3_3G033490/CsaV3_7G031080/CsaV3_6G003740/CsaV3_6G050260/CsaV3_7G007720/CsaV3_3G046610/CsaV3_6G045430/CsaV3_7G018780/CsaV3_3G010990/CsaV3_1G010220/CsaV3_7G033760/CsaV3_4G006260/CsaV3_7G007280/CsaV3_7G000830/CsaV3_2G029320/CsaV3_2G025600/CsaV3_1G005960/CsaV3_1G004730/CsaV3_1G0…	33	23	CsaV3_6G049050/CsaV3_3G010470/CsaV3_2G029310/CsaV3_4G001330/CsaV3_7G028990/CsaV3_5G036470/CsaV3_2G001570/CsaV3_7G031080/CsaV3_6G050260/CsaV3_7G007720/CsaV3_3G046610/CsaV3_6G045430/CsaV3_3G010990/CsaV3_7G033760/CsaV3_2G029320/CsaV3_1G005960/CsaV3_1G004730/CsaV3_4G032400/CsaV3_1G034650/CsaV3_3G026640/CsaV3_6G031870/CsaV3_5G006700/CsaV3_4G025720	10	CsaV3_1G032180/CsaV3_3G033490/CsaV3_6G003740/CsaV3_7G018780/CsaV3_1G010220/CsaV3_4G006260/CsaV3_7G007280/CsaV3_7G000830/CsaV3_2G025600/CsaV3_1G043220
MF	GO:0051536	iron-sulfur cluster binding	15/1748	47/8727	0.0366698	0.632555	CsaV3_3G013320/CsaV3_3G017880/CsaV3_1G000820/CsaV3_7G027180/CsaV3_4G037870/CsaV3_4G036370/CsaV3_1G014120/CsaV3_6G004170/CsaV3_4G017450/CsaV3_7G030190/CsaV3_1G042760/CsaV3_5G024910/CsaV3_5G008000/CsaV3_3G027530/CsaV3_4G035540	CsaV3_3G013320/CsaV3_3G017880/CsaV3_1G000820/CsaV3_7G027180/CsaV3_4G037870/CsaV3_4G036370/CsaV3_1G014120/CsaV3_6G004170/CsaV3_4G017450/CsaV3_7G030190/CsaV3_1G042760/CsaV3_5G024910/CsaV3_5G008000/CsaV3_3G027530/CsaV3_4G035540	15	6	CsaV3_3G013320/CsaV3_3G017880/CsaV3_7G027180/CsaV3_5G024910/CsaV3_3G027530/CsaV3_4G035540	9	CsaV3_1G000820/CsaV3_4G037870/CsaV3_4G036370/CsaV3_1G014120/CsaV3_6G004170/CsaV3_4G017450/CsaV3_7G030190/CsaV3_1G042760/CsaV3_5G008000
MF	GO:0051540	metal cluster binding	15/1748	47/8727	0.0366698	0.632555	CsaV3_3G013320/CsaV3_3G017880/CsaV3_1G000820/CsaV3_7G027180/CsaV3_4G037870/CsaV3_4G036370/CsaV3_1G014120/CsaV3_6G004170/CsaV3_4G017450/CsaV3_7G030190/CsaV3_1G042760/CsaV3_5G024910/CsaV3_5G008000/CsaV3_3G027530/CsaV3_4G035540	CsaV3_3G013320/CsaV3_3G017880/CsaV3_1G000820/CsaV3_7G027180/CsaV3_4G037870/CsaV3_4G036370/CsaV3_1G014120/CsaV3_6G004170/CsaV3_4G017450/CsaV3_7G030190/CsaV3_1G042760/CsaV3_5G024910/CsaV3_5G008000/CsaV3_3G027530/CsaV3_4G035540	15	6	CsaV3_3G013320/CsaV3_3G017880/CsaV3_7G027180/CsaV3_5G024910/CsaV3_3G027530/CsaV3_4G035540	9	CsaV3_1G000820/CsaV3_4G037870/CsaV3_4G036370/CsaV3_1G014120/CsaV3_6G004170/CsaV3_4G017450/CsaV3_7G030190/CsaV3_1G042760/CsaV3_5G008000
MF	GO:0015318	inorganic molecular entity transmembrane transporter activity	45/1748	176/8727	0.0421476	0.64551	CsaV3_6G049050/CsaV3_3G010470/CsaV3_7G027830/CsaV3_1G030670/CsaV3_2G003210/CsaV3_2G029310/CsaV3_4G001330/CsaV3_7G028990/CsaV3_5G036470/CsaV3_2G035030/CsaV3_3G028080/CsaV3_6G008570/CsaV3_2G001570/CsaV3_7G031080/CsaV3_6G003740/CsaV3_6G050260/CsaV3_7G007720/CsaV3_4G007780/CsaV3_6G004330/CsaV3_7G001940/CsaV3_3G046610/CsaV3_6G045430/CsaV3_7G018780/CsaV3_3G010990/CsaV3_5G000590/CsaV3_1G005040/CsaV3_1G0…	CsaV3_6G049050/CsaV3_3G010470/CsaV3_7G027830/CsaV3_1G030670/CsaV3_2G003210/CsaV3_2G029310/CsaV3_4G001330/CsaV3_7G028990/CsaV3_5G036470/CsaV3_2G035030/CsaV3_3G028080/CsaV3_6G008570/CsaV3_2G001570/CsaV3_7G031080/CsaV3_6G003740/CsaV3_6G050260/CsaV3_7G007720/CsaV3_4G007780/CsaV3_6G004330/CsaV3_7G001940/CsaV3_3G046610/CsaV3_6G045430/CsaV3_7G018780/CsaV3_3G010990/CsaV3_5G000590/CsaV3_1G005040/CsaV3_1G0…	45	33	CsaV3_6G049050/CsaV3_3G010470/CsaV3_7G027830/CsaV3_1G030670/CsaV3_2G003210/CsaV3_2G029310/CsaV3_4G001330/CsaV3_7G028990/CsaV3_5G036470/CsaV3_2G035030/CsaV3_3G028080/CsaV3_6G008570/CsaV3_2G001570/CsaV3_7G031080/CsaV3_6G050260/CsaV3_7G007720/CsaV3_4G007780/CsaV3_6G004330/CsaV3_7G001940/CsaV3_3G046610/CsaV3_6G045430/CsaV3_3G010990/CsaV3_4G028730/CsaV3_2G029320/CsaV3_3G046820/CsaV3_1G005960/CsaV3_5G0…	12	CsaV3_6G003740/CsaV3_7G018780/CsaV3_5G000590/CsaV3_1G005040/CsaV3_1G010220/CsaV3_3G044000/CsaV3_4G006260/CsaV3_7G007280/CsaV3_7G000830/CsaV3_2G025600/CsaV3_1G043220/CsaV3_2G029180
MF	GO:0015077	monovalent inorganic cation transmembrane transporter activity	21/1748	73/8727	0.0464758	0.64551	CsaV3_6G049050/CsaV3_3G010470/CsaV3_2G029310/CsaV3_4G001330/CsaV3_7G028990/CsaV3_5G036470/CsaV3_2G001570/CsaV3_7G031080/CsaV3_6G003740/CsaV3_3G046610/CsaV3_6G045430/CsaV3_7G018780/CsaV3_3G010990/CsaV3_1G010220/CsaV3_4G006260/CsaV3_7G007280/CsaV3_2G029320/CsaV3_2G025600/CsaV3_1G005960/CsaV3_1G004730/CsaV3_3G026640	CsaV3_6G049050/CsaV3_3G010470/CsaV3_2G029310/CsaV3_4G001330/CsaV3_7G028990/CsaV3_5G036470/CsaV3_2G001570/CsaV3_7G031080/CsaV3_6G003740/CsaV3_3G046610/CsaV3_6G045430/CsaV3_7G018780/CsaV3_3G010990/CsaV3_1G010220/CsaV3_4G006260/CsaV3_7G007280/CsaV3_2G029320/CsaV3_2G025600/CsaV3_1G005960/CsaV3_1G004730/CsaV3_3G026640	21	15	CsaV3_6G049050/CsaV3_3G010470/CsaV3_2G029310/CsaV3_4G001330/CsaV3_7G028990/CsaV3_5G036470/CsaV3_2G001570/CsaV3_7G031080/CsaV3_3G046610/CsaV3_6G045430/CsaV3_3G010990/CsaV3_2G029320/CsaV3_1G005960/CsaV3_1G004730/CsaV3_3G026640	6	CsaV3_6G003740/CsaV3_7G018780/CsaV3_1G010220/CsaV3_4G006260/CsaV3_7G007280/CsaV3_2G025600
MF	GO:0022890	inorganic cation transmembrane transporter activity	29/1748	107/8727	0.046564	0.64551	CsaV3_6G049050/CsaV3_3G010470/CsaV3_2G029310/CsaV3_4G001330/CsaV3_7G028990/CsaV3_5G036470/CsaV3_2G001570/CsaV3_7G031080/CsaV3_6G003740/CsaV3_6G050260/CsaV3_7G007720/CsaV3_3G046610/CsaV3_6G045430/CsaV3_7G018780/CsaV3_3G010990/CsaV3_1G010220/CsaV3_4G006260/CsaV3_7G007280/CsaV3_7G000830/CsaV3_2G029320/CsaV3_2G025600/CsaV3_1G005960/CsaV3_1G004730/CsaV3_1G043220/CsaV3_4G032400/CsaV3_1G034650/CsaV3_3G0…	CsaV3_6G049050/CsaV3_3G010470/CsaV3_2G029310/CsaV3_4G001330/CsaV3_7G028990/CsaV3_5G036470/CsaV3_2G001570/CsaV3_7G031080/CsaV3_6G003740/CsaV3_6G050260/CsaV3_7G007720/CsaV3_3G046610/CsaV3_6G045430/CsaV3_7G018780/CsaV3_3G010990/CsaV3_1G010220/CsaV3_4G006260/CsaV3_7G007280/CsaV3_7G000830/CsaV3_2G029320/CsaV3_2G025600/CsaV3_1G005960/CsaV3_1G004730/CsaV3_1G043220/CsaV3_4G032400/CsaV3_1G034650/CsaV3_3G0…	29	21	CsaV3_6G049050/CsaV3_3G010470/CsaV3_2G029310/CsaV3_4G001330/CsaV3_7G028990/CsaV3_5G036470/CsaV3_2G001570/CsaV3_7G031080/CsaV3_6G050260/CsaV3_7G007720/CsaV3_3G046610/CsaV3_6G045430/CsaV3_3G010990/CsaV3_2G029320/CsaV3_1G005960/CsaV3_1G004730/CsaV3_4G032400/CsaV3_1G034650/CsaV3_3G026640/CsaV3_6G031870/CsaV3_4G025720	8	CsaV3_6G003740/CsaV3_7G018780/CsaV3_1G010220/CsaV3_4G006260/CsaV3_7G007280/CsaV3_7G000830/CsaV3_2G025600/CsaV3_1G043220
MF	GO:0004857	enzyme inhibitor activity	18/1748	61/8727	0.0496285	0.64551	CsaV3_2G018180/CsaV3_6G006710/CsaV3_2G005010/CsaV3_7G026200/CsaV3_5G028280/CsaV3_1G005300/CsaV3_1G038650/CsaV3_6G006700/CsaV3_7G029590/CsaV3_2G018190/CsaV3_3G011030/CsaV3_5G003890/CsaV3_3G012540/CsaV3_3G047910/CsaV3_3G009850/CsaV3_6G049200/CsaV3_7G029580/CsaV3_3G000440	CsaV3_2G018180/CsaV3_6G006710/CsaV3_2G005010/CsaV3_7G026200/CsaV3_5G028280/CsaV3_1G005300/CsaV3_1G038650/CsaV3_6G006700/CsaV3_7G029590/CsaV3_2G018190/CsaV3_3G011030/CsaV3_5G003890/CsaV3_3G012540/CsaV3_3G047910/CsaV3_3G009850/CsaV3_6G049200/CsaV3_7G029580/CsaV3_3G000440	18	14	CsaV3_2G018180/CsaV3_6G006710/CsaV3_7G026200/CsaV3_5G028280/CsaV3_1G038650/CsaV3_6G006700/CsaV3_7G029590/CsaV3_2G018190/CsaV3_5G003890/CsaV3_3G012540/CsaV3_3G047910/CsaV3_6G049200/CsaV3_7G029580/CsaV3_3G000440	4	CsaV3_2G005010/CsaV3_1G005300/CsaV3_3G011030/CsaV3_3G009850

## Sheet: XS_40vsXN_40 DAP GO
Category	GOID	Description	GeneRatio	BgRatio	pvalue	padj	geneID	geneName	Count	Up	Up_Gene_id	Down	Down_Gene_id
BP	GO:0005984	disaccharide metabolic process	14/1697	22/5747	0.000926683	0.210912	CsaV3_5G020420/CsaV3_1G022900/CsaV3_2G033300/CsaV3_3G003030/CsaV3_1G001640/CsaV3_2G011150/CsaV3_3G038290/CsaV3_5G031700/CsaV3_1G005170/CsaV3_5G035080/CsaV3_3G001510/CsaV3_6G051060/CsaV3_4G004750/CsaV3_1G032890	CsaV3_5G020420/CsaV3_1G022900/CsaV3_2G033300/CsaV3_3G003030/CsaV3_1G001640/CsaV3_2G011150/CsaV3_3G038290/CsaV3_5G031700/CsaV3_1G005170/CsaV3_5G035080/CsaV3_3G001510/CsaV3_6G051060/CsaV3_4G004750/CsaV3_1G032890	14	10	CsaV3_5G020420/CsaV3_1G022900/CsaV3_2G033300/CsaV3_3G003030/CsaV3_2G011150/CsaV3_3G038290/CsaV3_1G005170/CsaV3_5G035080/CsaV3_3G001510/CsaV3_1G032890	4	CsaV3_1G001640/CsaV3_5G031700/CsaV3_6G051060/CsaV3_4G004750
BP	GO:0044262	cellular carbohydrate metabolic process	42/1697	96/5747	0.00199457	0.210912	CsaV3_6G035560/CsaV3_5G020420/CsaV3_1G022900/CsaV3_2G033300/CsaV3_3G003030/CsaV3_1G009520/CsaV3_6G002560/CsaV3_1G001640/CsaV3_1G040000/CsaV3_4G011810/CsaV3_2G011150/CsaV3_6G033720/CsaV3_6G038030/CsaV3_2G034720/CsaV3_3G038290/CsaV3_1G033150/CsaV3_4G032600/CsaV3_5G031700/CsaV3_5G027790/CsaV3_1G005170/CsaV3_4G004810/CsaV3_4G006790/CsaV3_5G035080/CsaV3_3G001510/CsaV3_4G010130/CsaV3_7G021570/CsaV3_6G0…	CsaV3_6G035560/CsaV3_5G020420/CsaV3_1G022900/CsaV3_2G033300/CsaV3_3G003030/CsaV3_1G009520/CsaV3_6G002560/CsaV3_1G001640/CsaV3_1G040000/CsaV3_4G011810/CsaV3_2G011150/CsaV3_6G033720/CsaV3_6G038030/CsaV3_2G034720/CsaV3_3G038290/CsaV3_1G033150/CsaV3_4G032600/CsaV3_5G031700/CsaV3_5G027790/CsaV3_1G005170/CsaV3_4G004810/CsaV3_4G006790/CsaV3_5G035080/CsaV3_3G001510/CsaV3_4G010130/CsaV3_7G021570/CsaV3_6G0…	42	30	CsaV3_6G035560/CsaV3_5G020420/CsaV3_1G022900/CsaV3_2G033300/CsaV3_3G003030/CsaV3_6G002560/CsaV3_4G011810/CsaV3_2G011150/CsaV3_6G033720/CsaV3_3G038290/CsaV3_1G033150/CsaV3_4G032600/CsaV3_5G027790/CsaV3_1G005170/CsaV3_4G004810/CsaV3_4G006790/CsaV3_5G035080/CsaV3_3G001510/CsaV3_4G010130/CsaV3_7G021570/CsaV3_2G001660/CsaV3_UNG190490/CsaV3_3G046510/CsaV3_2G009180/CsaV3_6G007450/CsaV3_6G007440/CsaV3_4G…	12	CsaV3_1G009520/CsaV3_1G001640/CsaV3_1G040000/CsaV3_6G038030/CsaV3_2G034720/CsaV3_5G031700/CsaV3_6G051060/CsaV3_4G004750/CsaV3_1G042280/novel.989/CsaV3_3G012430/CsaV3_3G048830
BP	GO:0005975	carbohydrate metabolic process	132/1697	363/5747	0.00222328	0.210912	CsaV3_3G000980/CsaV3_3G045050/CsaV3_6G044640/CsaV3_6G035560/CsaV3_5G020420/CsaV3_1G022900/CsaV3_2G033300/CsaV3_3G003030/CsaV3_1G009520/CsaV3_6G002560/CsaV3_1G001640/CsaV3_2G002990/CsaV3_2G002480/CsaV3_4G008840/CsaV3_3G008370/CsaV3_1G046750/CsaV3_3G014940/CsaV3_7G029890/CsaV3_3G020950/CsaV3_5G039830/CsaV3_6G048950/CsaV3_4G029230/CsaV3_1G040000/CsaV3_2G014660/CsaV3_4G000040/CsaV3_6G005730/CsaV3_3G0…	CsaV3_3G000980/CsaV3_3G045050/CsaV3_6G044640/CsaV3_6G035560/CsaV3_5G020420/CsaV3_1G022900/CsaV3_2G033300/CsaV3_3G003030/CsaV3_1G009520/CsaV3_6G002560/CsaV3_1G001640/CsaV3_2G002990/CsaV3_2G002480/CsaV3_4G008840/CsaV3_3G008370/CsaV3_1G046750/CsaV3_3G014940/CsaV3_7G029890/CsaV3_3G020950/CsaV3_5G039830/CsaV3_6G048950/CsaV3_4G029230/CsaV3_1G040000/CsaV3_2G014660/CsaV3_4G000040/CsaV3_6G005730/CsaV3_3G0…	132	86	CsaV3_3G000980/CsaV3_3G045050/CsaV3_6G044640/CsaV3_6G035560/CsaV3_5G020420/CsaV3_1G022900/CsaV3_2G033300/CsaV3_3G003030/CsaV3_6G002560/CsaV3_2G002480/CsaV3_4G008840/CsaV3_3G008370/CsaV3_1G046750/CsaV3_3G014940/CsaV3_7G029890/CsaV3_6G048950/CsaV3_4G029230/CsaV3_2G014660/CsaV3_4G000040/CsaV3_3G030180/CsaV3_4G011810/CsaV3_2G011150/CsaV3_6G033720/CsaV3_3G043060/CsaV3_1G032200/CsaV3_2G008560/CsaV3_1G0…	46	CsaV3_1G009520/CsaV3_1G001640/CsaV3_2G002990/CsaV3_3G020950/CsaV3_5G039830/CsaV3_1G040000/CsaV3_6G005730/CsaV3_6G004010/CsaV3_5G000260/CsaV3_6G045210/CsaV3_6G022480/CsaV3_6G038030/CsaV3_2G019390/CsaV3_2G015280/CsaV3_4G025880/CsaV3_2G034720/CsaV3_1G015360/CsaV3_2G011270/CsaV3_1G044130/CsaV3_5G031700/CsaV3_3G011520/CsaV3_5G035850/CsaV3_6G047280/CsaV3_6G044520/CsaV3_2G012230/CsaV3_2G008000/CsaV3_6G0…
BP	GO:0046351	disaccharide biosynthetic process	10/1697	15/5747	0.003171	0.210912	CsaV3_1G022900/CsaV3_3G003030/CsaV3_1G001640/CsaV3_3G038290/CsaV3_5G031700/CsaV3_5G035080/CsaV3_3G001510/CsaV3_6G051060/CsaV3_4G004750/CsaV3_1G032890	CsaV3_1G022900/CsaV3_3G003030/CsaV3_1G001640/CsaV3_3G038290/CsaV3_5G031700/CsaV3_5G035080/CsaV3_3G001510/CsaV3_6G051060/CsaV3_4G004750/CsaV3_1G032890	10	6	CsaV3_1G022900/CsaV3_3G003030/CsaV3_3G038290/CsaV3_5G035080/CsaV3_3G001510/CsaV3_1G032890	4	CsaV3_1G001640/CsaV3_5G031700/CsaV3_6G051060/CsaV3_4G004750
BP	GO:0034637	cellular carbohydrate biosynthetic process	30/1697	65/5747	0.0032079	0.210912	CsaV3_1G022900/CsaV3_3G003030/CsaV3_6G002560/CsaV3_1G001640/CsaV3_4G011810/CsaV3_6G033720/CsaV3_2G034720/CsaV3_3G038290/CsaV3_1G033150/CsaV3_4G032600/CsaV3_5G031700/CsaV3_4G004810/CsaV3_4G006790/CsaV3_5G035080/CsaV3_3G001510/CsaV3_4G010130/CsaV3_7G021570/CsaV3_6G051060/CsaV3_UNG190490/CsaV3_3G046510/CsaV3_4G004750/CsaV3_2G009180/CsaV3_6G007450/CsaV3_6G007440/CsaV3_4G006800/CsaV3_1G032890/CsaV3_7G…	CsaV3_1G022900/CsaV3_3G003030/CsaV3_6G002560/CsaV3_1G001640/CsaV3_4G011810/CsaV3_6G033720/CsaV3_2G034720/CsaV3_3G038290/CsaV3_1G033150/CsaV3_4G032600/CsaV3_5G031700/CsaV3_4G004810/CsaV3_4G006790/CsaV3_5G035080/CsaV3_3G001510/CsaV3_4G010130/CsaV3_7G021570/CsaV3_6G051060/CsaV3_UNG190490/CsaV3_3G046510/CsaV3_4G004750/CsaV3_2G009180/CsaV3_6G007450/CsaV3_6G007440/CsaV3_4G006800/CsaV3_1G032890/CsaV3_7G…	30	22	CsaV3_1G022900/CsaV3_3G003030/CsaV3_6G002560/CsaV3_4G011810/CsaV3_6G033720/CsaV3_3G038290/CsaV3_1G033150/CsaV3_4G032600/CsaV3_4G004810/CsaV3_4G006790/CsaV3_5G035080/CsaV3_3G001510/CsaV3_4G010130/CsaV3_7G021570/CsaV3_UNG190490/CsaV3_3G046510/CsaV3_2G009180/CsaV3_6G007450/CsaV3_6G007440/CsaV3_4G006800/CsaV3_1G032890/CsaV3_7G031450	8	CsaV3_1G001640/CsaV3_2G034720/CsaV3_5G031700/CsaV3_6G051060/CsaV3_4G004750/CsaV3_1G042280/novel.989/CsaV3_3G012430
BP	GO:0006066	alcohol metabolic process	9/1697	13/5747	0.00354049	0.210912	CsaV3_2G036570/CsaV3_2G036580/CsaV3_1G040000/CsaV3_4G004810/CsaV3_6G051460/CsaV3_2G001660/CsaV3_UNG190490/CsaV3_3G023420/CsaV3_3G048980	CsaV3_2G036570/CsaV3_2G036580/CsaV3_1G040000/CsaV3_4G004810/CsaV3_6G051460/CsaV3_2G001660/CsaV3_UNG190490/CsaV3_3G023420/CsaV3_3G048980	9	8	CsaV3_2G036570/CsaV3_2G036580/CsaV3_4G004810/CsaV3_6G051460/CsaV3_2G001660/CsaV3_UNG190490/CsaV3_3G023420/CsaV3_3G048980	1	CsaV3_1G040000
BP	GO:0019751	polyol metabolic process	9/1697	13/5747	0.00354049	0.210912	CsaV3_2G036570/CsaV3_2G036580/CsaV3_1G040000/CsaV3_4G004810/CsaV3_6G051460/CsaV3_2G001660/CsaV3_UNG190490/CsaV3_3G023420/CsaV3_3G048980	CsaV3_2G036570/CsaV3_2G036580/CsaV3_1G040000/CsaV3_4G004810/CsaV3_6G051460/CsaV3_2G001660/CsaV3_UNG190490/CsaV3_3G023420/CsaV3_3G048980	9	8	CsaV3_2G036570/CsaV3_2G036580/CsaV3_4G004810/CsaV3_6G051460/CsaV3_2G001660/CsaV3_UNG190490/CsaV3_3G023420/CsaV3_3G048980	1	CsaV3_1G040000
BP	GO:0016051	carbohydrate biosynthetic process	32/1697	72/5747	0.00490066	0.233352	CsaV3_6G044640/CsaV3_1G022900/CsaV3_3G003030/CsaV3_6G002560/CsaV3_1G001640/CsaV3_4G011810/CsaV3_6G033720/CsaV3_2G034720/CsaV3_3G038290/CsaV3_1G033150/CsaV3_4G032600/CsaV3_5G031700/CsaV3_4G004810/CsaV3_4G006790/CsaV3_5G035080/CsaV3_3G001510/CsaV3_4G010130/CsaV3_7G021570/CsaV3_6G051060/CsaV3_UNG190490/CsaV3_3G046510/CsaV3_4G004750/CsaV3_2G009180/CsaV3_6G007450/CsaV3_6G007440/CsaV3_4G006800/CsaV3_1G…	CsaV3_6G044640/CsaV3_1G022900/CsaV3_3G003030/CsaV3_6G002560/CsaV3_1G001640/CsaV3_4G011810/CsaV3_6G033720/CsaV3_2G034720/CsaV3_3G038290/CsaV3_1G033150/CsaV3_4G032600/CsaV3_5G031700/CsaV3_4G004810/CsaV3_4G006790/CsaV3_5G035080/CsaV3_3G001510/CsaV3_4G010130/CsaV3_7G021570/CsaV3_6G051060/CsaV3_UNG190490/CsaV3_3G046510/CsaV3_4G004750/CsaV3_2G009180/CsaV3_6G007450/CsaV3_6G007440/CsaV3_4G006800/CsaV3_1G…	32	24	CsaV3_6G044640/CsaV3_1G022900/CsaV3_3G003030/CsaV3_6G002560/CsaV3_4G011810/CsaV3_6G033720/CsaV3_3G038290/CsaV3_1G033150/CsaV3_4G032600/CsaV3_4G004810/CsaV3_4G006790/CsaV3_5G035080/CsaV3_3G001510/CsaV3_4G010130/CsaV3_7G021570/CsaV3_UNG190490/CsaV3_3G046510/CsaV3_2G009180/CsaV3_6G007450/CsaV3_6G007440/CsaV3_4G006800/CsaV3_1G032890/CsaV3_7G031450/CsaV3_2G028640	8	CsaV3_1G001640/CsaV3_2G034720/CsaV3_5G031700/CsaV3_6G051060/CsaV3_4G004750/CsaV3_1G042280/novel.989/CsaV3_3G012430
BP	GO:0009311	oligosaccharide metabolic process	14/1697	25/5747	0.00503637	0.233352	CsaV3_5G020420/CsaV3_1G022900/CsaV3_2G033300/CsaV3_3G003030/CsaV3_1G001640/CsaV3_2G011150/CsaV3_3G038290/CsaV3_5G031700/CsaV3_1G005170/CsaV3_5G035080/CsaV3_3G001510/CsaV3_6G051060/CsaV3_4G004750/CsaV3_1G032890	CsaV3_5G020420/CsaV3_1G022900/CsaV3_2G033300/CsaV3_3G003030/CsaV3_1G001640/CsaV3_2G011150/CsaV3_3G038290/CsaV3_5G031700/CsaV3_1G005170/CsaV3_5G035080/CsaV3_3G001510/CsaV3_6G051060/CsaV3_4G004750/CsaV3_1G032890	14	10	CsaV3_5G020420/CsaV3_1G022900/CsaV3_2G033300/CsaV3_3G003030/CsaV3_2G011150/CsaV3_3G038290/CsaV3_1G005170/CsaV3_5G035080/CsaV3_3G001510/CsaV3_1G032890	4	CsaV3_1G001640/CsaV3_5G031700/CsaV3_6G051060/CsaV3_4G004750
BP	GO:1901615	organic hydroxy compound metabolic process	10/1697	16/5747	0.00623172	0.238884	CsaV3_2G036570/CsaV3_2G036580/CsaV3_1G040000/CsaV3_3G033790/CsaV3_4G004810/CsaV3_6G051460/CsaV3_2G001660/CsaV3_UNG190490/CsaV3_3G023420/CsaV3_3G048980	CsaV3_2G036570/CsaV3_2G036580/CsaV3_1G040000/CsaV3_3G033790/CsaV3_4G004810/CsaV3_6G051460/CsaV3_2G001660/CsaV3_UNG190490/CsaV3_3G023420/CsaV3_3G048980	10	8	CsaV3_2G036570/CsaV3_2G036580/CsaV3_4G004810/CsaV3_6G051460/CsaV3_2G001660/CsaV3_UNG190490/CsaV3_3G023420/CsaV3_3G048980	2	CsaV3_1G040000/CsaV3_3G033790
BP	GO:0030001	metal ion transport	43/1697	104/5747	0.00630149	0.238884	CsaV3_2G006610/CsaV3_1G031800/CsaV3_7G023030/CsaV3_3G035170/CsaV3_6G022110/novel.194/CsaV3_5G001440/CsaV3_3G049960/CsaV3_7G001010/CsaV3_5G015530/CsaV3_5G002910/CsaV3_2G008620/CsaV3_4G032400/CsaV3_1G000430/CsaV3_6G016060/CsaV3_6G018590/CsaV3_5G034960/CsaV3_2G025560/CsaV3_3G014950/CsaV3_1G036370/CsaV3_6G039900/CsaV3_3G049970/CsaV3_4G027360/CsaV3_2G013190/CsaV3_3G006320/CsaV3_7G028990/CsaV3_3G013710…	CsaV3_2G006610/CsaV3_1G031800/CsaV3_7G023030/CsaV3_3G035170/CsaV3_6G022110/-/CsaV3_5G001440/CsaV3_3G049960/CsaV3_7G001010/CsaV3_5G015530/CsaV3_5G002910/CsaV3_2G008620/CsaV3_4G032400/CsaV3_1G000430/CsaV3_6G016060/CsaV3_6G018590/CsaV3_5G034960/CsaV3_2G025560/CsaV3_3G014950/CsaV3_1G036370/CsaV3_6G039900/CsaV3_3G049970/CsaV3_4G027360/CsaV3_2G013190/CsaV3_3G006320/CsaV3_7G028990/CsaV3_3G013710/CsaV3_3…	43	29	CsaV3_2G006610/CsaV3_1G031800/CsaV3_7G023030/CsaV3_3G035170/CsaV3_6G022110/novel.194/CsaV3_5G001440/CsaV3_3G049960/CsaV3_7G001010/CsaV3_5G002910/CsaV3_2G008620/CsaV3_4G032400/CsaV3_1G000430/CsaV3_6G016060/CsaV3_6G018590/CsaV3_5G034960/CsaV3_2G025560/CsaV3_3G014950/CsaV3_3G049970/CsaV3_2G013190/CsaV3_3G006320/CsaV3_7G028990/CsaV3_3G013710/CsaV3_1G039090/CsaV3_5G010840/CsaV3_4G012010/CsaV3_6G048280…	14	CsaV3_5G015530/CsaV3_1G036370/CsaV3_6G039900/CsaV3_4G027360/CsaV3_3G003410/CsaV3_4G026660/CsaV3_2G033440/CsaV3_5G035570/CsaV3_6G052820/CsaV3_7G024380/CsaV3_3G008630/CsaV3_1G014320/CsaV3_1G009780/CsaV3_4G024140
BP	GO:0005992	trehalose biosynthetic process	8/1697	13/5747	0.0163999	0.546987	CsaV3_1G022900/CsaV3_3G003030/CsaV3_1G001640/CsaV3_5G031700/CsaV3_3G001510/CsaV3_6G051060/CsaV3_4G004750/CsaV3_1G032890	CsaV3_1G022900/CsaV3_3G003030/CsaV3_1G001640/CsaV3_5G031700/CsaV3_3G001510/CsaV3_6G051060/CsaV3_4G004750/CsaV3_1G032890	8	4	CsaV3_1G022900/CsaV3_3G003030/CsaV3_3G001510/CsaV3_1G032890	4	CsaV3_1G001640/CsaV3_5G031700/CsaV3_6G051060/CsaV3_4G004750
BP	GO:0009312	oligosaccharide biosynthetic process	10/1697	18/5747	0.01857	0.546987	CsaV3_1G022900/CsaV3_3G003030/CsaV3_1G001640/CsaV3_3G038290/CsaV3_5G031700/CsaV3_5G035080/CsaV3_3G001510/CsaV3_6G051060/CsaV3_4G004750/CsaV3_1G032890	CsaV3_1G022900/CsaV3_3G003030/CsaV3_1G001640/CsaV3_3G038290/CsaV3_5G031700/CsaV3_5G035080/CsaV3_3G001510/CsaV3_6G051060/CsaV3_4G004750/CsaV3_1G032890	10	6	CsaV3_1G022900/CsaV3_3G003030/CsaV3_3G038290/CsaV3_5G035080/CsaV3_3G001510/CsaV3_1G032890	4	CsaV3_1G001640/CsaV3_5G031700/CsaV3_6G051060/CsaV3_4G004750
BP	GO:0044282	small molecule catabolic process	10/1697	18/5747	0.01857	0.546987	CsaV3_1G040000/CsaV3_5G030450/CsaV3_4G008430/CsaV3_1G040320/CsaV3_2G034560/CsaV3_2G001660/CsaV3_4G013550/CsaV3_3G023420/CsaV3_5G004440/CsaV3_UNG137080	CsaV3_1G040000/CsaV3_5G030450/CsaV3_4G008430/CsaV3_1G040320/CsaV3_2G034560/CsaV3_2G001660/CsaV3_4G013550/CsaV3_3G023420/CsaV3_5G004440/CsaV3_UNG137080	10	4	CsaV3_5G030450/CsaV3_2G001660/CsaV3_4G013550/CsaV3_3G023420	6	CsaV3_1G040000/CsaV3_4G008430/CsaV3_1G040320/CsaV3_2G034560/CsaV3_5G004440/CsaV3_UNG137080
BP	GO:0016042	lipid catabolic process	7/1697	1405394	0.0196758	0.546987	CsaV3_5G004710/CsaV3_3G020970/CsaV3_2G034560/CsaV3_3G030770/CsaV3_6G022670/CsaV3_5G004440/CsaV3_UNG137080	CsaV3_5G004710/CsaV3_3G020970/CsaV3_2G034560/CsaV3_3G030770/CsaV3_6G022670/CsaV3_5G004440/CsaV3_UNG137080	7	1	CsaV3_6G022670	6	CsaV3_5G004710/CsaV3_3G020970/CsaV3_2G034560/CsaV3_3G030770/CsaV3_5G004440/CsaV3_UNG137080
BP	GO:0005991	trehalose metabolic process	8/1697	14/5747	0.0284954	0.742661	CsaV3_1G022900/CsaV3_3G003030/CsaV3_1G001640/CsaV3_5G031700/CsaV3_3G001510/CsaV3_6G051060/CsaV3_4G004750/CsaV3_1G032890	CsaV3_1G022900/CsaV3_3G003030/CsaV3_1G001640/CsaV3_5G031700/CsaV3_3G001510/CsaV3_6G051060/CsaV3_4G004750/CsaV3_1G032890	8	4	CsaV3_1G022900/CsaV3_3G003030/CsaV3_3G001510/CsaV3_1G032890	4	CsaV3_1G001640/CsaV3_5G031700/CsaV3_6G051060/CsaV3_4G004750
BP	GO:0009308	amine metabolic process	13/1697	27/5747	0.0313978	0.77017	CsaV3_2G007750/CsaV3_3G020560/CsaV3_1G038260/CsaV3_3G043270/CsaV3_5G003800/CsaV3_2G007090/CsaV3_1G031480/CsaV3_5G003790/CsaV3_5G006200/CsaV3_4G036030/CsaV3_3G013880/CsaV3_1G001170/CsaV3_1G040510	CsaV3_2G007750/CsaV3_3G020560/CsaV3_1G038260/CsaV3_3G043270/CsaV3_5G003800/CsaV3_2G007090/CsaV3_1G031480/CsaV3_5G003790/CsaV3_5G006200/CsaV3_4G036030/CsaV3_3G013880/CsaV3_1G001170/CsaV3_1G040510	13	10	CsaV3_2G007750/CsaV3_3G020560/CsaV3_1G038260/CsaV3_3G043270/CsaV3_5G003800/CsaV3_2G007090/CsaV3_1G031480/CsaV3_5G003790/CsaV3_3G013880/CsaV3_1G001170	3	CsaV3_5G006200/CsaV3_4G036030/CsaV3_1G040510
BP	GO:0006811	ion transport	87/1697	251/5747	0.0412962	0.956694	CsaV3_2G006610/CsaV3_7G033120/CsaV3_1G031800/CsaV3_6G004330/CsaV3_7G023030/CsaV3_3G035170/CsaV3_6G022110/novel.194/CsaV3_5G001440/CsaV3_3G037990/CsaV3_5G006700/CsaV3_1G043750/CsaV3_3G019160/CsaV3_3G049960/CsaV3_3G046820/CsaV3_7G001010/CsaV3_5G015530/CsaV3_5G002910/CsaV3_2G008620/CsaV3_4G032400/CsaV3_1G000430/CsaV3_4G028730/CsaV3_6G016060/CsaV3_6G018590/CsaV3_3G046610/CsaV3_5G034960/CsaV3_3G033490…	CsaV3_2G006610/CsaV3_7G033120/CsaV3_1G031800/CsaV3_6G004330/CsaV3_7G023030/CsaV3_3G035170/CsaV3_6G022110/-/CsaV3_5G001440/CsaV3_3G037990/CsaV3_5G006700/CsaV3_1G043750/CsaV3_3G019160/CsaV3_3G049960/CsaV3_3G046820/CsaV3_7G001010/CsaV3_5G015530/CsaV3_5G002910/CsaV3_2G008620/CsaV3_4G032400/CsaV3_1G000430/CsaV3_4G028730/CsaV3_6G016060/CsaV3_6G018590/CsaV3_3G046610/CsaV3_5G034960/CsaV3_3G033490/CsaV3_3…	87	60	CsaV3_2G006610/CsaV3_7G033120/CsaV3_1G031800/CsaV3_6G004330/CsaV3_7G023030/CsaV3_3G035170/CsaV3_6G022110/novel.194/CsaV3_5G001440/CsaV3_3G037990/CsaV3_5G006700/CsaV3_1G043750/CsaV3_3G019160/CsaV3_3G049960/CsaV3_3G046820/CsaV3_7G001010/CsaV3_5G002910/CsaV3_2G008620/CsaV3_4G032400/CsaV3_1G000430/CsaV3_4G028730/CsaV3_6G016060/CsaV3_6G018590/CsaV3_3G046610/CsaV3_5G034960/CsaV3_3G012960/CsaV3_2G025560…	27	CsaV3_5G015530/CsaV3_3G033490/CsaV3_1G010750/CsaV3_4G007780/CsaV3_1G036370/CsaV3_6G039900/CsaV3_4G027360/CsaV3_3G030290/CsaV3_3G003410/CsaV3_1G036520/CsaV3_1G008910/CsaV3_4G026660/CsaV3_2G031740/CsaV3_2G033440/CsaV3_5G035570/novel.460/CsaV3_3G007840/CsaV3_6G052820/CsaV3_7G000200/CsaV3_7G024380/CsaV3_3G008630/CsaV3_1G014320/CsaV3_1G009780/CsaV3_6G018950/CsaV3_2G029320/CsaV3_4G024140/CsaV3_3G010990
BP	GO:0009066	aspartate family amino acid metabolic process	6/1697	1405363	0.043829	0.961932	CsaV3_3G040500/CsaV3_6G031950/CsaV3_2G011840/CsaV3_3G043020/CsaV3_3G016820/CsaV3_6G045440	CsaV3_3G040500/CsaV3_6G031950/CsaV3_2G011840/CsaV3_3G043020/CsaV3_3G016820/CsaV3_6G045440	6	5	CsaV3_3G040500/CsaV3_2G011840/CsaV3_3G043020/CsaV3_3G016820/CsaV3_6G045440	1	CsaV3_6G031950
BP	GO:0006928	movement of cell or subcellular component	21/1697	51/5747	0.0496909	0.98672	CsaV3_4G034600/CsaV3_3G022850/CsaV3_7G000390/CsaV3_3G009580/CsaV3_3G000080/CsaV3_1G024160/novel.313/CsaV3_4G022100/CsaV3_UNG147160/CsaV3_3G047980/CsaV3_7G033280/CsaV3_7G000280/CsaV3_2G015170/CsaV3_1G033760/CsaV3_5G027690/CsaV3_4G005820/CsaV3_2G005260/CsaV3_3G015910/CsaV3_6G022300/CsaV3_5G003600/CsaV3_6G036700	CsaV3_4G034600/CsaV3_3G022850/CsaV3_7G000390/CsaV3_3G009580/CsaV3_3G000080/CsaV3_1G024160/-/CsaV3_4G022100/CsaV3_UNG147160/CsaV3_3G047980/CsaV3_7G033280/CsaV3_7G000280/CsaV3_2G015170/CsaV3_1G033760/CsaV3_5G027690/CsaV3_4G005820/CsaV3_2G005260/CsaV3_3G015910/CsaV3_6G022300/CsaV3_5G003600/CsaV3_6G036700	21	18	CsaV3_4G034600/CsaV3_3G022850/CsaV3_7G000390/CsaV3_3G009580/CsaV3_1G024160/novel.313/CsaV3_4G022100/CsaV3_3G047980/CsaV3_7G033280/CsaV3_7G000280/CsaV3_2G015170/CsaV3_1G033760/CsaV3_5G027690/CsaV3_4G005820/CsaV3_2G005260/CsaV3_3G015910/CsaV3_6G022300/CsaV3_6G036700	3	CsaV3_3G000080/CsaV3_UNG147160/CsaV3_5G003600
BP	GO:0007018	microtubule-based movement	21/1697	51/5747	0.0496909	0.98672	CsaV3_4G034600/CsaV3_3G022850/CsaV3_7G000390/CsaV3_3G009580/CsaV3_3G000080/CsaV3_1G024160/novel.313/CsaV3_4G022100/CsaV3_UNG147160/CsaV3_3G047980/CsaV3_7G033280/CsaV3_7G000280/CsaV3_2G015170/CsaV3_1G033760/CsaV3_5G027690/CsaV3_4G005820/CsaV3_2G005260/CsaV3_3G015910/CsaV3_6G022300/CsaV3_5G003600/CsaV3_6G036700	CsaV3_4G034600/CsaV3_3G022850/CsaV3_7G000390/CsaV3_3G009580/CsaV3_3G000080/CsaV3_1G024160/-/CsaV3_4G022100/CsaV3_UNG147160/CsaV3_3G047980/CsaV3_7G033280/CsaV3_7G000280/CsaV3_2G015170/CsaV3_1G033760/CsaV3_5G027690/CsaV3_4G005820/CsaV3_2G005260/CsaV3_3G015910/CsaV3_6G022300/CsaV3_5G003600/CsaV3_6G036700	21	18	CsaV3_4G034600/CsaV3_3G022850/CsaV3_7G000390/CsaV3_3G009580/CsaV3_1G024160/novel.313/CsaV3_4G022100/CsaV3_3G047980/CsaV3_7G033280/CsaV3_7G000280/CsaV3_2G015170/CsaV3_1G033760/CsaV3_5G027690/CsaV3_4G005820/CsaV3_2G005260/CsaV3_3G015910/CsaV3_6G022300/CsaV3_6G036700	3	CsaV3_3G000080/CsaV3_UNG147160/CsaV3_5G003600
CC	GO:0033177	proton-transporting two-sector ATPase complex, proton-transporting domain	8/584	14/2083	0.0206244	0.99997	CsaV3_3G046610/CsaV3_2G031740/CsaV3_5G036470/CsaV3_2G029210/CsaV3_7G000200/CsaV3_2G029320/CsaV3_2G001570/CsaV3_3G010990	CsaV3_3G046610/CsaV3_2G031740/CsaV3_5G036470/CsaV3_2G029210/CsaV3_7G000200/CsaV3_2G029320/CsaV3_2G001570/CsaV3_3G010990	8	4	CsaV3_3G046610/CsaV3_5G036470/CsaV3_2G029210/CsaV3_2G001570	4	CsaV3_2G031740/CsaV3_7G000200/CsaV3_2G029320/CsaV3_3G010990
MF	GO:0051087	chaperone binding	227729	2452209	0.0339129	0.992049	CsaV3_1G017210/CsaV3_6G016030/CsaV3_4G029080/CsaV3_3G038670/CsaV3_3G016810/CsaV3_1G044180/CsaV3_5G005880	CsaV3_1G017210/CsaV3_6G016030/CsaV3_4G029080/CsaV3_3G038670/CsaV3_3G016810/CsaV3_1G044180/CsaV3_5G005880	7	3	CsaV3_6G016030/CsaV3_3G016810/CsaV3_5G005880	4	CsaV3_1G017210/CsaV3_4G029080/CsaV3_3G038670/CsaV3_1G044180
MF	GO:0004252	serine-type endopeptidase activity	20/2523	47/8613	0.0357942	0.992049	CsaV3_5G013690/CsaV3_4G008810/CsaV3_2G026250/CsaV3_1G041110/CsaV3_2G008690/CsaV3_1G046090/CsaV3_4G037050/CsaV3_3G016510/CsaV3_5G003180/CsaV3_3G003960/CsaV3_7G034030/CsaV3_4G030510/CsaV3_3G034860/CsaV3_6G043840/CsaV3_4G005900/CsaV3_2G015990/CsaV3_3G016900/CsaV3_3G003520/CsaV3_5G013840/CsaV3_2G026160	CsaV3_5G013690/CsaV3_4G008810/CsaV3_2G026250/CsaV3_1G041110/CsaV3_2G008690/CsaV3_1G046090/CsaV3_4G037050/CsaV3_3G016510/CsaV3_5G003180/CsaV3_3G003960/CsaV3_7G034030/CsaV3_4G030510/CsaV3_3G034860/CsaV3_6G043840/CsaV3_4G005900/CsaV3_2G015990/CsaV3_3G016900/CsaV3_3G003520/CsaV3_5G013840/CsaV3_2G026160	20	11	CsaV3_5G013690/CsaV3_4G008810/CsaV3_2G026250/CsaV3_1G041110/CsaV3_2G008690/CsaV3_4G037050/CsaV3_6G043840/CsaV3_4G005900/CsaV3_2G015990/CsaV3_3G003520/CsaV3_5G013840	9	CsaV3_1G046090/CsaV3_3G016510/CsaV3_5G003180/CsaV3_3G003960/CsaV3_7G034030/CsaV3_4G030510/CsaV3_3G034860/CsaV3_3G016900/CsaV3_2G026160
MF	GO:0004616	phosphogluconate dehydrogenase (decarboxylating) activity	227699	2452148	0.0422566	0.992049	CsaV3_4G006330/CsaV3_3G043780/CsaV3_3G043770/CsaV3_1G037300/CsaV3_2G001870/CsaV3_1G004440	CsaV3_4G006330/CsaV3_3G043780/CsaV3_3G043770/CsaV3_1G037300/CsaV3_2G001870/CsaV3_1G004440	6	3	CsaV3_4G006330/CsaV3_3G043780/CsaV3_2G001870	3	CsaV3_3G043770/CsaV3_1G037300/CsaV3_1G004440
MF	GO:0051537	2 iron, 2 sulfur cluster binding	227699	2452148	0.0422566	0.992049	CsaV3_1G041790/CsaV3_1G014120/CsaV3_4G036370/CsaV3_7G004050/CsaV3_1G041800/CsaV3_5G024910	CsaV3_1G041790/CsaV3_1G014120/CsaV3_4G036370/CsaV3_7G004050/CsaV3_1G041800/CsaV3_5G024910	6	2	CsaV3_1G041790/CsaV3_5G024910	4	CsaV3_1G014120/CsaV3_4G036370/CsaV3_7G004050/CsaV3_1G041800
MF	GO:0003777	microtubule motor activity	21/2523	51/8613	0.046118	0.992049	CsaV3_4G034600/CsaV3_3G022850/CsaV3_7G000390/CsaV3_3G009580/CsaV3_3G000080/CsaV3_1G024160/novel.313/CsaV3_4G022100/CsaV3_UNG147160/CsaV3_3G047980/CsaV3_7G033280/CsaV3_7G000280/CsaV3_2G015170/CsaV3_1G033760/CsaV3_5G027690/CsaV3_4G005820/CsaV3_2G005260/CsaV3_3G015910/CsaV3_6G022300/CsaV3_5G003600/CsaV3_6G036700	CsaV3_4G034600/CsaV3_3G022850/CsaV3_7G000390/CsaV3_3G009580/CsaV3_3G000080/CsaV3_1G024160/-/CsaV3_4G022100/CsaV3_UNG147160/CsaV3_3G047980/CsaV3_7G033280/CsaV3_7G000280/CsaV3_2G015170/CsaV3_1G033760/CsaV3_5G027690/CsaV3_4G005820/CsaV3_2G005260/CsaV3_3G015910/CsaV3_6G022300/CsaV3_5G003600/CsaV3_6G036700	21	18	CsaV3_4G034600/CsaV3_3G022850/CsaV3_7G000390/CsaV3_3G009580/CsaV3_1G024160/novel.313/CsaV3_4G022100/CsaV3_3G047980/CsaV3_7G033280/CsaV3_7G000280/CsaV3_2G015170/CsaV3_1G033760/CsaV3_5G027690/CsaV3_4G005820/CsaV3_2G005260/CsaV3_3G015910/CsaV3_6G022300/CsaV3_6G036700	3	CsaV3_3G000080/CsaV3_UNG147160/CsaV3_5G003600
MF	GO:0003774	motor activity	23/2523	57/8613	0.0479799	0.992049	CsaV3_7G031590/CsaV3_4G034600/CsaV3_3G022850/CsaV3_7G000390/CsaV3_3G009580/CsaV3_3G000080/CsaV3_1G024160/novel.313/CsaV3_4G022100/CsaV3_UNG147160/CsaV3_3G047980/CsaV3_7G033280/CsaV3_7G000280/CsaV3_2G015170/CsaV3_1G033760/CsaV3_5G027690/CsaV3_4G005820/CsaV3_5G029000/CsaV3_2G005260/CsaV3_3G015910/CsaV3_6G022300/CsaV3_5G003600/CsaV3_6G036700	CsaV3_7G031590/CsaV3_4G034600/CsaV3_3G022850/CsaV3_7G000390/CsaV3_3G009580/CsaV3_3G000080/CsaV3_1G024160/-/CsaV3_4G022100/CsaV3_UNG147160/CsaV3_3G047980/CsaV3_7G033280/CsaV3_7G000280/CsaV3_2G015170/CsaV3_1G033760/CsaV3_5G027690/CsaV3_4G005820/CsaV3_5G029000/CsaV3_2G005260/CsaV3_3G015910/CsaV3_6G022300/CsaV3_5G003600/CsaV3_6G036700	23	20	CsaV3_7G031590/CsaV3_4G034600/CsaV3_3G022850/CsaV3_7G000390/CsaV3_3G009580/CsaV3_1G024160/novel.313/CsaV3_4G022100/CsaV3_3G047980/CsaV3_7G033280/CsaV3_7G000280/CsaV3_2G015170/CsaV3_1G033760/CsaV3_5G027690/CsaV3_4G005820/CsaV3_5G029000/CsaV3_2G005260/CsaV3_3G015910/CsaV3_6G022300/CsaV3_6G036700	3	CsaV3_3G000080/CsaV3_UNG147160/CsaV3_5G003600
MF	GO:0042578	phosphoric ester hydrolase activity	26/2523	66/8613	0.0497523	0.992049	CsaV3_1G036210/CsaV3_7G006880/CsaV3_7G034880/CsaV3_1G000580/CsaV3_6G004010/CsaV3_4G025880/CsaV3_7G034100/CsaV3_6G043350/CsaV3_5G010130/CsaV3_3G043000/CsaV3_3G038290/CsaV3_2G001720/CsaV3_6G018610/CsaV3_4G002900/CsaV3_5G035080/CsaV3_1G027910/CsaV3_UNG064500/CsaV3_5G006730/CsaV3_4G025970/CsaV3_2G015840/CsaV3_6G051200/CsaV3_1G004910/CsaV3_1G006010/CsaV3_5G010390/CsaV3_6G033690/CsaV3_6G040630	CsaV3_1G036210/CsaV3_7G006880/CsaV3_7G034880/CsaV3_1G000580/CsaV3_6G004010/CsaV3_4G025880/CsaV3_7G034100/CsaV3_6G043350/CsaV3_5G010130/CsaV3_3G043000/CsaV3_3G038290/CsaV3_2G001720/CsaV3_6G018610/CsaV3_4G002900/CsaV3_5G035080/CsaV3_1G027910/CsaV3_UNG064500/CsaV3_5G006730/CsaV3_4G025970/CsaV3_2G015840/CsaV3_6G051200/CsaV3_1G004910/CsaV3_1G006010/CsaV3_5G010390/CsaV3_6G033690/CsaV3_6G040630	26	15	CsaV3_1G036210/CsaV3_7G006880/CsaV3_7G034880/CsaV3_7G034100/CsaV3_6G043350/CsaV3_5G010130/CsaV3_3G038290/CsaV3_5G035080/CsaV3_5G006730/CsaV3_4G025970/CsaV3_6G051200/CsaV3_1G004910/CsaV3_1G006010/CsaV3_5G010390/CsaV3_6G033690	11	CsaV3_1G000580/CsaV3_6G004010/CsaV3_4G025880/CsaV3_3G043000/CsaV3_2G001720/CsaV3_6G018610/CsaV3_4G002900/CsaV3_1G027910/CsaV3_UNG064500/CsaV3_2G015840/CsaV3_6G040630

## Sheet: XS_vs XN_ Shared common GO
Category	GOID	Description	GeneRatio	BgRatio	pvalue	padj	geneID	geneName	Count
BP	GO:0016567	protein ubiquitination	22678	43/6278	0.0669249	0.706928	CsaV3_3G021120/CsaV3_3G038010	CsaV3_3G021120/CsaV3_3G038010	2
BP	GO:0032446	protein modification by small protein conjugation	22678	44/6278	0.069678	0.706928	CsaV3_3G021120/CsaV3_3G038010	CsaV3_3G021120/CsaV3_3G038010	2
BP	GO:0015979	photosynthesis	22678	46/6278	0.0752939	0.706928	CsaV3_1G011330/CsaV3_4G007600	CsaV3_1G011330/CsaV3_4G007600	2
BP	GO:0006308	DNA catabolic process	22647	28764	0.0945471	0.706928	CsaV3_UNG200520	CsaV3_UNG200520	1
BP	GO:0090305	nucleic acid phosphodiester bond hydrolysis	22647	28764	0.0945471	0.706928	CsaV3_UNG200520	CsaV3_UNG200520	1
BP	GO:0009664	plant-type cell wall organization	22647	28795	0.103503	0.706928	CsaV3_3G014980	CsaV3_3G014980	1
BP	GO:0071669	plant-type cell wall organization or biogenesis	22647	28795	0.103503	0.706928	CsaV3_3G014980	CsaV3_3G014980	1
BP	GO:0006081	cellular aldehyde metabolic process	22647	28825	0.112373	0.706928	CsaV3_5G034910	CsaV3_5G034910	1
BP	GO:0042546	cell wall biogenesis	22647	28825	0.112373	0.706928	CsaV3_3G014980	CsaV3_3G014980	1
BP	GO:0044272	sulfur compound biosynthetic process	22647	28825	0.112373	0.706928	CsaV3_7G018620	CsaV3_7G018620	1
BP	GO:0070647	protein modification by small protein conjugation or removal	22678	64/6278	0.131287	0.706928	CsaV3_3G021120/CsaV3_3G038010	CsaV3_3G021120/CsaV3_3G038010	2
BP	GO:0008272	sulfate transport	22647	15/6278	0.138465	0.706928	CsaV3_4G028730	CsaV3_4G028730	1
BP	GO:0009605	response to external stimulus	22647	15/6278	0.138465	0.706928	CsaV3_3G015190	CsaV3_3G015190	1
BP	GO:0072348	sulfur compound transport	22647	15/6278	0.138465	0.706928	CsaV3_4G028730	CsaV3_4G028730	1
BP	GO:0006643	membrane lipid metabolic process	22647	19/6278	0.172085	0.706928	CsaV3_5G039980	CsaV3_5G039980	1
BP	GO:0007154	cell communication	22737	222/6278	0.175429	0.706928	CsaV3_3G015190/CsaV3_6G000240/CsaV3_6G019070/CsaV3_7G004020	CsaV3_3G015190/CsaV3_6G000240/CsaV3_6G019070/CsaV3_7G004020	4
BP	GO:0045454	cell redox homeostasis	22678	81/6278	0.190324	0.706928	CsaV3_3G038140/CsaV3_5G039280	CsaV3_3G038140/CsaV3_5G039280	2
BP	GO:0019725	cellular homeostasis	22678	82/6278	0.193911	0.706928	CsaV3_3G038140/CsaV3_5G039280	CsaV3_3G038140/CsaV3_5G039280	2
BP	GO:0042592	homeostatic process	22678	83/6278	0.197507	0.706928	CsaV3_3G038140/CsaV3_5G039280	CsaV3_3G038140/CsaV3_5G039280	2
BP	GO:0015698	inorganic anion transport	22647	27/6278	0.235498	0.706928	CsaV3_4G028730	CsaV3_4G028730	1
BP	GO:0006790	sulfur compound metabolic process	22647	28/6278	0.24308	0.706928	CsaV3_7G018620	CsaV3_7G018620	1
BP	GO:0006887	exocytosis	22647	30/6278	0.258024	0.706928	CsaV3_6G022100	CsaV3_6G022100	1
BP	GO:0032940	secretion by cell	22647	30/6278	0.258024	0.706928	CsaV3_6G022100	CsaV3_6G022100	1
BP	GO:0046903	secretion	22647	30/6278	0.258024	0.706928	CsaV3_6G022100	CsaV3_6G022100	1
BP	GO:0007165	signal transduction	22706	184/6278	0.272927	0.706928	CsaV3_3G015190/CsaV3_6G000240/CsaV3_6G019070	CsaV3_3G015190/CsaV3_6G000240/CsaV3_6G019070	3
BP	GO:0023052	signaling	22706	184/6278	0.272927	0.706928	CsaV3_3G015190/CsaV3_6G000240/CsaV3_6G019070	CsaV3_3G015190/CsaV3_6G000240/CsaV3_6G019070	3
BP	GO:0008037	cell recognition	22647	34/6278	0.287047	0.706928	CsaV3_7G004020	CsaV3_7G004020	1
BP	GO:0009856	pollination	22647	34/6278	0.287047	0.706928	CsaV3_7G004020	CsaV3_7G004020	1
BP	GO:0009875	pollen-pistil interaction	22647	34/6278	0.287047	0.706928	CsaV3_7G004020	CsaV3_7G004020	1
BP	GO:0044706	multi-multicellular organism process	22647	34/6278	0.287047	0.706928	CsaV3_7G004020	CsaV3_7G004020	1
BP	GO:0048544	recognition of pollen	22647	34/6278	0.287047	0.706928	CsaV3_7G004020	CsaV3_7G004020	1
BP	GO:0065008	regulation of biological quality	22678	109/6278	0.292686	0.706928	CsaV3_3G038140/CsaV3_5G039280	CsaV3_3G038140/CsaV3_5G039280	2
BP	GO:0000003	reproduction	22647	36/6278	0.301136	0.706928	CsaV3_7G004020	CsaV3_7G004020	1
BP	GO:0022414	reproductive process	22647	36/6278	0.301136	0.706928	CsaV3_7G004020	CsaV3_7G004020	1
BP	GO:1901607	alpha-amino acid biosynthetic process	22647	36/6278	0.301136	0.706928	CsaV3_7G018620	CsaV3_7G018620	1
BP	GO:0006486	protein glycosylation	22647	38/6278	0.314951	0.706928	CsaV3_5G031040	CsaV3_5G031040	1
BP	GO:0043413	macromolecule glycosylation	22647	38/6278	0.314951	0.706928	CsaV3_5G031040	CsaV3_5G031040	1
BP	GO:0009733	response to auxin	22647	40/6278	0.328498	0.706928	CsaV3_5G000180	CsaV3_5G000180	1
BP	GO:0019362	pyridine nucleotide metabolic process	22647	40/6278	0.328498	0.706928	CsaV3_5G034910	CsaV3_5G034910	1
BP	GO:0046496	nicotinamide nucleotide metabolic process	22647	40/6278	0.328498	0.706928	CsaV3_5G034910	CsaV3_5G034910	1
BP	GO:0006733	oxidoreduction coenzyme metabolic process	22647	41/6278	0.335172	0.706928	CsaV3_5G034910	CsaV3_5G034910	1
BP	GO:0009100	glycoprotein metabolic process	22647	41/6278	0.335172	0.706928	CsaV3_5G031040	CsaV3_5G031040	1
BP	GO:0009101	glycoprotein biosynthetic process	22647	41/6278	0.335172	0.706928	CsaV3_5G031040	CsaV3_5G031040	1
BP	GO:0070085	glycosylation	22647	42/6278	0.341781	0.706928	CsaV3_5G031040	CsaV3_5G031040	1
BP	GO:0034655	nucleobase-containing compound catabolic process	22647	43/6278	0.348325	0.706928	CsaV3_UNG200520	CsaV3_UNG200520	1
BP	GO:0072524	pyridine-containing compound metabolic process	22647	43/6278	0.348325	0.706928	CsaV3_5G034910	CsaV3_5G034910	1
BP	GO:0006259	DNA metabolic process	22678	126/6278	0.354622	0.706928	CsaV3_6G046400/CsaV3_UNG200520	CsaV3_6G046400/CsaV3_UNG200520	2
BP	GO:0051704	multi-organism process	22647	44/6278	0.354805	0.706928	CsaV3_7G004020	CsaV3_7G004020	1
BP	GO:0008652	cellular amino acid biosynthetic process	22647	45/6278	0.361222	0.706928	CsaV3_7G018620	CsaV3_7G018620	1
BP	GO:0006260	DNA replication	22647	46/6278	0.367576	0.706928	CsaV3_6G046400	CsaV3_6G046400	1
BP	GO:0006928	movement of cell or subcellular component	22647	48/6278	0.380098	0.706928	CsaV3_7G000390	CsaV3_7G000390	1
BP	GO:0007018	microtubule-based movement	22647	48/6278	0.380098	0.706928	CsaV3_7G000390	CsaV3_7G000390	1
BP	GO:1901605	alpha-amino acid metabolic process	22647	49/6278	0.386267	0.706928	CsaV3_7G018620	CsaV3_7G018620	1
BP	GO:0046700	heterocycle catabolic process	22647	50/6278	0.392376	0.706928	CsaV3_UNG200520	CsaV3_UNG200520	1
BP	GO:0009607	response to biotic stimulus	22647	51/6278	0.398425	0.706928	CsaV3_1G045200	CsaV3_1G045200	1
BP	GO:0044270	cellular nitrogen compound catabolic process	22647	51/6278	0.398425	0.706928	CsaV3_UNG200520	CsaV3_UNG200520	1
BP	GO:1901361	organic cyclic compound catabolic process	22647	51/6278	0.398425	0.706928	CsaV3_UNG200520	CsaV3_UNG200520	1
BP	GO:0019439	aromatic compound catabolic process	22647	52/6278	0.404414	0.706928	CsaV3_UNG200520	CsaV3_UNG200520	1
BP	GO:0009719	response to endogenous stimulus	22647	55/6278	0.422034	0.706928	CsaV3_5G000180	CsaV3_5G000180	1
BP	GO:0009725	response to hormone	22647	55/6278	0.422034	0.706928	CsaV3_5G000180	CsaV3_5G000180	1
BP	GO:0010033	response to organic substance	22647	55/6278	0.422034	0.706928	CsaV3_5G000180	CsaV3_5G000180	1
BP	GO:0032501	multicellular organismal process	22647	55/6278	0.422034	0.706928	CsaV3_7G004020	CsaV3_7G004020	1
BP	GO:0044265	cellular macromolecule catabolic process	22647	56/6278	0.427792	0.706928	CsaV3_UNG200520	CsaV3_UNG200520	1
BP	GO:0045229	external encapsulating structure organization	22647	57/6278	0.433494	0.706928	CsaV3_3G014980	CsaV3_3G014980	1
BP	GO:0071555	cell wall organization	22647	57/6278	0.433494	0.706928	CsaV3_3G014980	CsaV3_3G014980	1
BP	GO:0006629	lipid metabolic process	22706	249/6278	0.448588	0.707912	CsaV3_1G036900/CsaV3_5G039980/CsaV3_7G029850	CsaV3_1G036900/CsaV3_5G039980/CsaV3_7G029850	3
BP	GO:0051716	cellular response to stimulus	22706	249/6278	0.448588	0.707912	CsaV3_3G015190/CsaV3_6G000240/CsaV3_6G019070	CsaV3_3G015190/CsaV3_6G000240/CsaV3_6G019070	3
BP	GO:0006820	anion transport	22647	61/6278	0.455747	0.707912	CsaV3_4G028730	CsaV3_4G028730	1
BP	GO:0006457	protein folding	22647	63/6278	0.466549	0.707912	CsaV3_3G015840	CsaV3_3G015840	1
BP	GO:0007017	microtubule-based process	22647	64/6278	0.471871	0.707912	CsaV3_7G000390	CsaV3_7G000390	1
BP	GO:1901135	carbohydrate derivative metabolic process	22678	163/6278	0.48174	0.707912	CsaV3_5G031040/CsaV3_5G034910	CsaV3_5G031040/CsaV3_5G034910	2
BP	GO:0006732	coenzyme metabolic process	22647	67/6278	0.487525	0.707912	CsaV3_5G034910	CsaV3_5G034910	1
BP	GO:0006952	defense response	22647	67/6278	0.487525	0.707912	CsaV3_1G045200	CsaV3_1G045200	1
BP	GO:0071554	cell wall organization or biogenesis	22647	69/6278	0.497706	0.710513	CsaV3_3G014980	CsaV3_3G014980	1
BP	GO:0022607	cellular component assembly	22647	70/6278	0.502721	0.710513	CsaV3_3G014980	CsaV3_3G014980	1
BP	GO:0009057	macromolecule catabolic process	22647	76/6278	0.531797	0.738527	CsaV3_UNG200520	CsaV3_UNG200520	1
BP	GO:0019693	ribose phosphate metabolic process	22647	77/6278	0.536477	0.738527	CsaV3_5G034910	CsaV3_5G034910	1
BP	GO:0051186	cofactor metabolic process	22647	92/6278	0.601402	0.81729	CsaV3_5G034910	CsaV3_5G034910	1
BP	GO:0009117	nucleotide metabolic process	22647	95/6278	0.613269	0.81772	CsaV3_5G034910	CsaV3_5G034910	1
BP	GO:0006753	nucleoside phosphate metabolic process	22647	96/6278	0.617147	0.81772	CsaV3_5G034910	CsaV3_5G034910	1
BP	GO:0044085	cellular component biogenesis	22647	105/6278	0.650371	0.836684	CsaV3_3G014980	CsaV3_3G014980	1
BP	GO:0042221	response to chemical	22647	107/6278	0.657359	0.836684	CsaV3_5G000180	CsaV3_5G000180	1
BP	GO:0006520	cellular amino acid metabolic process	22647	110/6278	0.667585	0.836684	CsaV3_7G018620	CsaV3_7G018620	1
BP	GO:0055086	nucleobase-containing small molecule metabolic process	22647	111/6278	0.670926	0.836684	CsaV3_5G034910	CsaV3_5G034910	1
BP	GO:1901137	carbohydrate derivative biosynthetic process	22647	111/6278	0.670926	0.836684	CsaV3_5G031040	CsaV3_5G031040	1
BP	GO:0016192	vesicle-mediated transport	22647	116/6278	0.687144	0.836774	CsaV3_6G022100	CsaV3_6G022100	1
BP	GO:0016053	organic acid biosynthetic process	22647	120/6278	0.699549	0.836774	CsaV3_7G018620	CsaV3_7G018620	1
BP	GO:0046394	carboxylic acid biosynthetic process	22647	120/6278	0.699549	0.836774	CsaV3_7G018620	CsaV3_7G018620	1
BP	GO:0044248	cellular catabolic process	22647	121/6278	0.702574	0.836774	CsaV3_UNG200520	CsaV3_UNG200520	1
BP	GO:0044255	cellular lipid metabolic process	22647	128/6278	0.722926	0.851447	CsaV3_5G039980	CsaV3_5G039980	1
BP	GO:1901575	organic substance catabolic process	22647	136/6278	0.744512	0.860727	CsaV3_UNG200520	CsaV3_UNG200520	1
BP	GO:0071705	nitrogen compound transport	22647	137/6278	0.747091	0.860727	CsaV3_3G033490	CsaV3_3G033490	1
BP	GO:0009056	catabolic process	22647	141/6278	0.757153	0.860727	CsaV3_UNG200520	CsaV3_UNG200520	1
BP	GO:0044283	small molecule biosynthetic process	22647	145/6278	0.766821	0.860727	CsaV3_7G018620	CsaV3_7G018620	1
BP	GO:0006811	ion transport	22678	280/6278	0.771406	0.860727	CsaV3_3G033490/CsaV3_4G028730	CsaV3_3G033490/CsaV3_4G028730	2
BP	GO:0006950	response to stress	22678	289/6278	0.786598	0.862606	CsaV3_1G005840/CsaV3_1G045200	CsaV3_1G005840/CsaV3_1G045200	2
BP	GO:0019637	organophosphate metabolic process	22647	155/6278	0.789366	0.862606	CsaV3_5G034910	CsaV3_5G034910	1
BP	GO:0016043	cellular component organization	22647	183/6278	0.841695	0.910405	CsaV3_3G014980	CsaV3_3G014980	1
BP	GO:0006812	cation transport	22647	197/6278	0.862829	0.920649	CsaV3_3G033490	CsaV3_3G033490	1
BP	GO:0044281	small molecule metabolic process	22678	353/6278	0.871477	0.920649	CsaV3_5G034910/CsaV3_7G018620	CsaV3_5G034910/CsaV3_7G018620	2
BP	GO:0071840	cellular component organization or biogenesis	22647	218/6278	0.889428	0.920649	CsaV3_3G014980	CsaV3_3G014980	1
BP	GO:0019752	carboxylic acid metabolic process	22647	222/6278	0.893885	0.920649	CsaV3_7G018620	CsaV3_7G018620	1
BP	GO:0043436	oxoacid metabolic process	22647	230/6278	0.902276	0.920649	CsaV3_7G018620	CsaV3_7G018620	1
BP	GO:0006082	organic acid metabolic process	22647	231/6278	0.903278	0.920649	CsaV3_7G018620	CsaV3_7G018620	1
BP	GO:0006508	proteolysis	22647	256/6278	0.925285	0.934097	CsaV3_5G025440	CsaV3_5G025440	1
BP	GO:1901566	organonitrogen compound biosynthetic process	22678	488/6278	0.959441	0.959441	CsaV3_5G031040/CsaV3_7G018620	CsaV3_5G031040/CsaV3_7G018620	2
CC	GO:0009654	photosystem II oxygen evolving complex	42767	16/2213	0.00625841	0.0611944	CsaV3_1G011330/CsaV3_4G007600	CsaV3_1G011330/CsaV3_4G007600	2
CC	GO:0042651	thylakoid membrane	42767	17/2213	0.00706089	0.0611944	CsaV3_1G011330/CsaV3_4G007600	CsaV3_1G011330/CsaV3_4G007600	2
CC	GO:1990204	oxidoreductase complex	42767	17/2213	0.00706089	0.0611944	CsaV3_1G011330/CsaV3_4G007600	CsaV3_1G011330/CsaV3_4G007600	2
CC	GO:0009523	photosystem II	42767	25/2213	0.0150232	0.0976507	CsaV3_1G011330/CsaV3_4G007600	CsaV3_1G011330/CsaV3_4G007600	2
CC	GO:0009521	photosystem	42767	40/2213	0.0365111	0.124187	CsaV3_1G011330/CsaV3_4G007600	CsaV3_1G011330/CsaV3_4G007600	2
CC	GO:0009579	thylakoid	42767	41/2213	0.0382115	0.124187	CsaV3_1G011330/CsaV3_4G007600	CsaV3_1G011330/CsaV3_4G007600	2
CC	GO:0034357	photosynthetic membrane	42767	41/2213	0.0382115	0.124187	CsaV3_1G011330/CsaV3_4G007600	CsaV3_1G011330/CsaV3_4G007600	2
CC	GO:0044436	thylakoid part	42767	41/2213	0.0382115	0.124187	CsaV3_1G011330/CsaV3_4G007600	CsaV3_1G011330/CsaV3_4G007600	2
CC	GO:0019898	extrinsic component of membrane	42736	20/2213	0.143499	0.271664	CsaV3_1G011330	CsaV3_1G011330	1
CC	GO:0031012	extracellular matrix	42736	20/2213	0.143499	0.271664	CsaV3_5G025440	CsaV3_5G025440	1
CC	GO:0044421	extracellular region part	42736	20/2213	0.143499	0.271664	CsaV3_5G025440	CsaV3_5G025440	1
CC	GO:0000145	exocyst	42736	22/2213	0.156729	0.271664	CsaV3_6G022100	CsaV3_6G022100	1
CC	GO:0005938	cell cortex	42736	22/2213	0.156729	0.271664	CsaV3_6G022100	CsaV3_6G022100	1
CC	GO:0044448	cell cortex part	42736	22/2213	0.156729	0.271664	CsaV3_6G022100	CsaV3_6G022100	1
CC	GO:0099568	cytoplasmic region	42736	22/2213	0.156729	0.271664	CsaV3_6G022100	CsaV3_6G022100	1
CC	GO:0099023	tethering complex	42736	24/2213	0.169767	0.275872	CsaV3_6G022100	CsaV3_6G022100	1
CC	GO:1902494	catalytic complex	42767	102/2213	0.183002	0.279885	CsaV3_1G011330/CsaV3_4G007600	CsaV3_1G011330/CsaV3_4G007600	2
CC	GO:0098796	membrane protein complex	42767	132/2213	0.269372	0.389093	CsaV3_1G011330/CsaV3_4G007600	CsaV3_1G011330/CsaV3_4G007600	2
CC	GO:0005694	chromosome	42736	44/2213	0.290121	0.397008	CsaV3_UNG200520	CsaV3_UNG200520	1
CC	GO:0005576	extracellular region	42736	47/2213	0.30669	0.398697	CsaV3_5G025440	CsaV3_5G025440	1
CC	GO:0071944	cell periphery	42736	112/2213	0.58778	0.727728	CsaV3_6G022100	CsaV3_6G022100	1
CC	GO:0043228	non-membrane-bounded organelle	42736	282/2213	0.902345	0.972726	CsaV3_UNG200520	CsaV3_UNG200520	1
CC	GO:0043232	intracellular non-membrane-bounded organelle	42736	282/2213	0.902345	0.972726	CsaV3_UNG200520	CsaV3_UNG200520	1
CC	GO:0005737	cytoplasm	42767	497/2213	0.92232	0.972726	CsaV3_6G022100/CsaV3_7G018620	CsaV3_6G022100/CsaV3_7G018620	2
CC	GO:0005634	nucleus	42736	374/2213	0.957563	0.972726	CsaV3_6G038490	CsaV3_6G038490	1
CC	GO:0044444	cytoplasmic part	42736	421/2213	0.972726	0.972726	CsaV3_6G022100	CsaV3_6G022100	1
MF	GO:0003700	DNA binding transcription factor activity	35004	374/9200	0.0015733	0.119572	CsaV3_1G012520/CsaV3_1G041310/CsaV3_2G015250/CsaV3_3G008170/CsaV3_3G016760/CsaV3_3G018600/CsaV3_4G028670/CsaV3_4G033470/CsaV3_5G033090/CsaV3_7G005810/CsaV3_7G008630	CsaV3_1G012520/CsaV3_1G041310/CsaV3_2G015250/CsaV3_3G008170/CsaV3_3G016760/CsaV3_3G018600/CsaV3_4G028670/CsaV3_4G033470/CsaV3_5G033090/CsaV3_7G005810/CsaV3_7G008630	11
MF	GO:0140110	transcription regulator activity	35004	397/9200	0.00251731	0.119572	CsaV3_1G012520/CsaV3_1G041310/CsaV3_2G015250/CsaV3_3G008170/CsaV3_3G016760/CsaV3_3G018600/CsaV3_4G028670/CsaV3_4G033470/CsaV3_5G033090/CsaV3_7G005810/CsaV3_7G008630	CsaV3_1G012520/CsaV3_1G041310/CsaV3_2G015250/CsaV3_3G008170/CsaV3_3G016760/CsaV3_3G018600/CsaV3_4G028670/CsaV3_4G033470/CsaV3_5G033090/CsaV3_7G005810/CsaV3_7G008630	11
MF	GO:0016747	transferase activity, transferring acyl groups other than amino-acyl groups	34790	113/9200	0.0292606	0.655362	CsaV3_1G033850/CsaV3_3G034110/CsaV3_3G045460/CsaV3_7G018620	CsaV3_1G033850/CsaV3_3G034110/CsaV3_3G045460/CsaV3_7G018620	4
MF	GO:0005509	calcium ion binding	34790	134/9200	0.0496665	0.655362	CsaV3_1G004290/CsaV3_1G011330/CsaV3_5G033780/CsaV3_5G038130	CsaV3_1G004290/CsaV3_1G011330/CsaV3_5G033780/CsaV3_5G038130	4
MF	GO:0038023	signaling receptor activity	34731	36/9200	0.0529771	0.655362	CsaV3_2G035030/CsaV3_3G015190	CsaV3_2G035030/CsaV3_3G015190	2
MF	GO:0060089	molecular transducer activity	34731	36/9200	0.0529771	0.655362	CsaV3_2G035030/CsaV3_3G015190	CsaV3_2G035030/CsaV3_3G015190	2
MF	GO:0016746	transferase activity, transferring acyl groups	34790	149/9200	0.0680285	0.655362	CsaV3_1G033850/CsaV3_3G034110/CsaV3_3G045460/CsaV3_7G018620	CsaV3_1G033850/CsaV3_3G034110/CsaV3_3G045460/CsaV3_7G018620	4
MF	GO:0000155	phosphorelay sensor kinase activity	34700	36800	0.0986384	0.655362	CsaV3_3G015190	CsaV3_3G015190	1
MF	GO:0004673	protein histidine kinase activity	34700	36800	0.0986384	0.655362	CsaV3_3G015190	CsaV3_3G015190	1
MF	GO:0016775	phosphotransferase activity, nitrogenous group as acceptor	34700	36800	0.0986384	0.655362	CsaV3_3G015190	CsaV3_3G015190	1
MF	GO:0004842	ubiquitin-protein transferase activity	34731	52/9200	0.100427	0.655362	CsaV3_3G021120/CsaV3_3G038010	CsaV3_3G021120/CsaV3_3G038010	2
MF	GO:0019787	ubiquitin-like protein transferase activity	34731	52/9200	0.100427	0.655362	CsaV3_3G021120/CsaV3_3G038010	CsaV3_3G021120/CsaV3_3G038010	2
MF	GO:0140103	catalytic activity, acting on a glycoprotein	34700	36831	0.107956	0.655362	CsaV3_5G031040	CsaV3_5G031040	1
MF	GO:0004871	signal transducer activity	34731	55/9200	0.110302	0.655362	CsaV3_2G035030/CsaV3_3G015190	CsaV3_2G035030/CsaV3_3G015190	2
MF	GO:0016861	intramolecular oxidoreductase activity, interconverting aldoses and ketoses	34700	36861	0.117178	0.655362	CsaV3_5G034910	CsaV3_5G034910	1
MF	GO:1901681	sulfur compound binding	34700	13/9200	0.126306	0.655362	CsaV3_6G050730	CsaV3_6G050730	1
MF	GO:0043565	sequence-specific DNA binding	34790	188/9200	0.129533	0.655362	CsaV3_2G002310/CsaV3_2G015250/CsaV3_3G008170/CsaV3_5G033090	CsaV3_2G002310/CsaV3_2G015250/CsaV3_3G008170/CsaV3_5G033090	4
MF	GO:0016860	intramolecular oxidoreductase activity	34700	14/9200	0.135341	0.655362	CsaV3_5G034910	CsaV3_5G034910	1
MF	GO:0015116	sulfate transmembrane transporter activity	34700	15/9200	0.144283	0.655362	CsaV3_4G028730	CsaV3_4G028730	1
MF	GO:1901682	sulfur compound transmembrane transporter activity	34700	15/9200	0.144283	0.655362	CsaV3_4G028730	CsaV3_4G028730	1
MF	GO:0003993	acid phosphatase activity	34700	16/9200	0.153134	0.655362	CsaV3_1G027910	CsaV3_1G027910	1
MF	GO:0008374	O-acyltransferase activity	34700	16/9200	0.153134	0.655362	CsaV3_7G018620	CsaV3_7G018620	1
MF	GO:0016407	acetyltransferase activity	34700	18/9200	0.170564	0.655362	CsaV3_7G018620	CsaV3_7G018620	1
MF	GO:0008171	O-methyltransferase activity	34700	22/9200	0.204367	0.655362	CsaV3_7G003180	CsaV3_7G003180	1
MF	GO:0004970	ionotropic glutamate receptor activity	34700	24/9200	0.220754	0.655362	CsaV3_2G035030	CsaV3_2G035030	1
MF	GO:0005230	extracellular ligand-gated ion channel activity	34700	24/9200	0.220754	0.655362	CsaV3_2G035030	CsaV3_2G035030	1
MF	GO:0008066	glutamate receptor activity	34700	24/9200	0.220754	0.655362	CsaV3_2G035030	CsaV3_2G035030	1
MF	GO:0015276	ligand-gated ion channel activity	34700	24/9200	0.220754	0.655362	CsaV3_2G035030	CsaV3_2G035030	1
MF	GO:0022824	transmitter-gated ion channel activity	34700	24/9200	0.220754	0.655362	CsaV3_2G035030	CsaV3_2G035030	1
MF	GO:0022834	ligand-gated channel activity	34700	24/9200	0.220754	0.655362	CsaV3_2G035030	CsaV3_2G035030	1
MF	GO:0022835	transmitter-gated channel activity	34700	24/9200	0.220754	0.655362	CsaV3_2G035030	CsaV3_2G035030	1
MF	GO:0030594	neurotransmitter receptor activity	34700	24/9200	0.220754	0.655362	CsaV3_2G035030	CsaV3_2G035030	1
MF	GO:0004888	transmembrane signaling receptor activity	34700	26/9200	0.236806	0.661664	CsaV3_2G035030	CsaV3_2G035030	1
MF	GO:0015103	inorganic anion transmembrane transporter activity	34700	26/9200	0.236806	0.661664	CsaV3_4G028730	CsaV3_4G028730	1
MF	GO:0022836	gated channel activity	34700	30/9200	0.267936	0.700637	CsaV3_2G035030	CsaV3_2G035030	1
MF	GO:0022839	ion gated channel activity	34700	30/9200	0.267936	0.700637	CsaV3_2G035030	CsaV3_2G035030	1
MF	GO:0005516	calmodulin binding	34700	31/9200	0.27552	0.700637	CsaV3_1G005840	CsaV3_1G005840	1
MF	GO:0008375	acetylglucosaminyltransferase activity	34700	33/9200	0.290456	0.700637	CsaV3_5G031040	CsaV3_5G031040	1
MF	GO:0046983	protein dimerization activity	34790	271/9200	0.306733	0.700637	CsaV3_3G001710/CsaV3_3G007980/CsaV3_6G008210/CsaV3_6G009670	CsaV3_3G001710/CsaV3_3G007980/CsaV3_6G008210/CsaV3_6G009670	4
MF	GO:0015035	protein disulfide oxidoreductase activity	34700	38/9200	0.326475	0.700637	CsaV3_3G038140	CsaV3_3G038140	1
MF	GO:0008509	anion transmembrane transporter activity	34700	39/9200	0.333459	0.700637	CsaV3_4G028730	CsaV3_4G028730	1
MF	GO:0004222	metalloendopeptidase activity	34700	42/9200	0.353983	0.700637	CsaV3_5G025440	CsaV3_5G025440	1
MF	GO:0016702	oxidoreductase activity, acting on single donors with incorporation of molecular oxygen, incorporation of two atoms of oxygen	34700	43/9200	0.360685	0.700637	CsaV3_4G007180	CsaV3_4G007180	1
MF	GO:0016791	phosphatase activity	34700	45/9200	0.373882	0.700637	CsaV3_1G027910	CsaV3_1G027910	1
MF	GO:0051213	dioxygenase activity	34700	45/9200	0.373882	0.700637	CsaV3_4G007180	CsaV3_4G007180	1
MF	GO:0004175	endopeptidase activity	34731	127/9200	0.378527	0.700637	CsaV3_3G016900/CsaV3_5G025440	CsaV3_3G016900/CsaV3_5G025440	2
MF	GO:0015075	ion transmembrane transporter activity	34759	218/9200	0.392065	0.700637	CsaV3_2G035030/CsaV3_3G033490/CsaV3_4G028730	CsaV3_2G035030/CsaV3_3G033490/CsaV3_4G028730	3
MF	GO:0003777	microtubule motor activity	34700	48/9200	0.393174	0.700637	CsaV3_7G000390	CsaV3_7G000390	1
MF	GO:0015036	disulfide oxidoreductase activity	34700	49/9200	0.399473	0.700637	CsaV3_3G038140	CsaV3_3G038140	1
MF	GO:0005216	ion channel activity	34700	50/9200	0.405707	0.700637	CsaV3_2G035030	CsaV3_2G035030	1
MF	GO:0008237	metallopeptidase activity	34700	50/9200	0.405707	0.700637	CsaV3_5G025440	CsaV3_5G025440	1
MF	GO:0015267	channel activity	34700	50/9200	0.405707	0.700637	CsaV3_2G035030	CsaV3_2G035030	1
MF	GO:0022803	passive transmembrane transporter activity	34700	50/9200	0.405707	0.700637	CsaV3_2G035030	CsaV3_2G035030	1
MF	GO:0022838	substrate-specific channel activity	34700	50/9200	0.405707	0.700637	CsaV3_2G035030	CsaV3_2G035030	1
MF	GO:0003774	motor activity	34700	54/9200	0.43001	0.700637	CsaV3_7G000390	CsaV3_7G000390	1
MF	GO:0016701	oxidoreductase activity, acting on single donors with incorporation of molecular oxygen	34700	54/9200	0.43001	0.700637	CsaV3_4G007180	CsaV3_4G007180	1
MF	GO:0008017	microtubule binding	34700	55/9200	0.435931	0.700637	CsaV3_7G000390	CsaV3_7G000390	1
MF	GO:0043531	ADP binding	34700	55/9200	0.435931	0.700637	CsaV3_4G003630	CsaV3_4G003630	1
MF	GO:0016667	oxidoreductase activity, acting on a sulfur group of donors	34700	57/9200	0.44759	0.700637	CsaV3_3G038140	CsaV3_3G038140	1
MF	GO:0008270	zinc ion binding	34790	335/9200	0.456874	0.700637	CsaV3_2G015250/CsaV3_3G032250/CsaV3_5G025440/CsaV3_6G016680	CsaV3_2G015250/CsaV3_3G032250/CsaV3_5G025440/CsaV3_6G016680	4
MF	GO:0000287	magnesium ion binding	34700	59/9200	0.45901	0.700637	CsaV3_6G050730	CsaV3_6G050730	1
MF	GO:0004252	serine-type endopeptidase activity	34700	60/9200	0.464633	0.700637	CsaV3_3G016900	CsaV3_3G016900	1
MF	GO:0015631	tubulin binding	34700	60/9200	0.464633	0.700637	CsaV3_7G000390	CsaV3_7G000390	1
MF	GO:0046982	protein heterodimerization activity	34700	63/9200	0.481155	0.714215	CsaV3_6G009670	CsaV3_6G009670	1
MF	GO:0042578	phosphoric ester hydrolase activity	34700	69/9200	0.512701	0.745277	CsaV3_1G027910	CsaV3_1G027910	1
MF	GO:0019842	vitamin binding	34700	70/9200	0.517771	0.745277	CsaV3_6G050730	CsaV3_6G050730	1
MF	GO:0005215	transporter activity	34820	479/9200	0.555359	0.787449	CsaV3_2G028250/CsaV3_2G035030/CsaV3_3G033490/CsaV3_4G028730/CsaV3_6G003430	CsaV3_2G028250/CsaV3_2G035030/CsaV3_3G033490/CsaV3_4G028730/CsaV3_6G003430	5
MF	GO:0008194	UDP-glycosyltransferase activity	34700	85/9200	0.587844	0.815265	CsaV3_5G031040	CsaV3_5G031040	1
MF	GO:0008092	cytoskeletal protein binding	34700	86/9200	0.59214	0.815265	CsaV3_7G000390	CsaV3_7G000390	1
MF	GO:0016757	transferase activity, transferring glycosyl groups	34759	302/9200	0.608072	0.816664	CsaV3_5G031040/CsaV3_5G031980/CsaV3_7G006650	CsaV3_5G031040/CsaV3_5G031980/CsaV3_7G006650	3
MF	GO:0015318	inorganic molecular entity transmembrane transporter activity	34731	198/9200	0.610349	0.816664	CsaV3_2G035030/CsaV3_4G028730	CsaV3_2G035030/CsaV3_4G028730	2
MF	GO:0016853	isomerase activity	34700	100/9200	0.647827	0.84106	CsaV3_5G034910	CsaV3_5G034910	1
MF	GO:0008236	serine-type peptidase activity	34700	102/9200	0.655142	0.84106	CsaV3_3G016900	CsaV3_3G016900	1
MF	GO:0017171	serine hydrolase activity	34700	102/9200	0.655142	0.84106	CsaV3_3G016900	CsaV3_3G016900	1
MF	GO:0009055	electron transfer activity	34700	115/9200	0.699158	0.8856	CsaV3_3G038140	CsaV3_3G038140	1
MF	GO:0016758	transferase activity, transferring hexosyl groups	34731	244/9200	0.722413	0.895021	CsaV3_5G031040/CsaV3_7G006650	CsaV3_5G031040/CsaV3_7G006650	2
MF	GO:0022857	transmembrane transporter activity	34759	363/9200	0.729961	0.895021	CsaV3_2G035030/CsaV3_3G033490/CsaV3_4G028730	CsaV3_2G035030/CsaV3_3G033490/CsaV3_4G028730	3
MF	GO:0070011	peptidase activity, acting on L-amino acid peptides	34731	250/9200	0.73486	0.895021	CsaV3_3G016900/CsaV3_5G025440	CsaV3_3G016900/CsaV3_5G025440	2
MF	GO:0008233	peptidase activity	34731	259/9200	0.752649	0.898052	CsaV3_3G016900/CsaV3_5G025440	CsaV3_3G016900/CsaV3_5G025440	2
MF	GO:0008324	cation transmembrane transporter activity	34700	135/9200	0.756254	0.898052	CsaV3_3G033490	CsaV3_3G033490	1
MF	GO:0008168	methyltransferase activity	34700	142/9200	0.773588	0.907295	CsaV3_7G003180	CsaV3_7G003180	1
MF	GO:0016741	transferase activity, transferring one-carbon groups	34700	149/9200	0.789702	0.914898	CsaV3_7G003180	CsaV3_7G003180	1
MF	GO:0005506	iron ion binding	34700	230/9200	0.910876	0.973569	CsaV3_4G007140	CsaV3_4G007140	1
MF	GO:0017111	nucleoside-triphosphatase activity	34700	233/9200	0.913678	0.973569	CsaV3_7G000390	CsaV3_7G000390	1
MF	GO:0016705	oxidoreductase activity, acting on paired donors, with incorporation or reduction of molecular oxygen	34700	238/9200	0.918156	0.973569	CsaV3_4G007140	CsaV3_4G007140	1
MF	GO:0016462	pyrophosphatase activity	34700	239/9200	0.919023	0.973569	CsaV3_7G000390	CsaV3_7G000390	1
MF	GO:0016818	hydrolase activity, acting on acid anhydrides, in phosphorus-containing anhydrides	34700	244/9200	0.923226	0.973569	CsaV3_7G000390	CsaV3_7G000390	1
MF	GO:0016817	hydrolase activity, acting on acid anhydrides	34700	245/9200	0.924041	0.973569	CsaV3_7G000390	CsaV3_7G000390	1
MF	GO:0016788	hydrolase activity, acting on ester bonds	34700	275/9200	0.944869	0.973569	CsaV3_1G027910	CsaV3_1G027910	1
MF	GO:0050662	coenzyme binding	34700	275/9200	0.944869	0.973569	CsaV3_6G050730	CsaV3_6G050730	1
MF	GO:0004553	hydrolase activity, hydrolyzing O-glycosyl compounds	34700	296/9200	0.955976	0.973569	CsaV3_5G039980	CsaV3_5G039980	1
MF	GO:0020037	heme binding	34700	299/9200	0.95737	0.973569	CsaV3_4G007140	CsaV3_4G007140	1
MF	GO:0046906	tetrapyrrole binding	34700	303/9200	0.959162	0.973569	CsaV3_4G007140	CsaV3_4G007140	1
MF	GO:0016798	hydrolase activity, acting on glycosyl bonds	34700	313/9200	0.963321	0.973569	CsaV3_5G039980	CsaV3_5G039980	1
MF	GO:0003924	GTPase activity	0/95	36/9200	1	1			0
