# Supplementary material for: Transcriptomic and Physiological Analyses Reveal Potential Genes Involved in Photoperiod-Regulated β-Carotene Accumulation Mechanisms in the Endocarp of Cucumber (Cucumis sativus L.) Fruit
Source: Int J Mol Sci. 2022 Oct 21;23(20):12650. doi: 10.3390/ijms232012650 (PMC9604348; doi:10.3390/ijms232012650)
Supplement: Supplementary file 1 [file ijms-23-12650-s001.zip › Supplementary Datasheet S3_GO enrichment within XS and XN timepoints.xlsx]

## Sheet: XS_20vsXS_10DAP GO
Category	GOID	Description	GeneRatio	BgRatio	pvalue	padj	geneID	geneName	Count	Up	Up_Gene_id	Down	Down_Gene_id
BP	GO:0006260	DNA replication	41/3437	47/5812	2.59342e-05	0.0108146	CsaV3_6G051630/CsaV3_7G029940/CsaV3_6G053180/CsaV3_7G000210/CsaV3_6G016510/CsaV3_5G039570/CsaV3_3G006750/CsaV3_4G033030/CsaV3_5G035370/CsaV3_1G002970/CsaV3_2G010800/CsaV3_6G008170/CsaV3_2G003500/CsaV3_5G005690/CsaV3_1G006150/CsaV3_3G030270/CsaV3_6G042080/CsaV3_4G007230/CsaV3_6G038660/CsaV3_7G026150/CsaV3_2G031090/CsaV3_4G028050/CsaV3_3G001070/CsaV3_3G038830/CsaV3_4G031600/CsaV3_7G006750/CsaV3_4G0…	CsaV3_6G051630/CsaV3_7G029940/CsaV3_6G053180/CsaV3_7G000210/CsaV3_6G016510/CsaV3_5G039570/CsaV3_3G006750/CsaV3_4G033030/CsaV3_5G035370/CsaV3_1G002970/CsaV3_2G010800/CsaV3_6G008170/CsaV3_2G003500/CsaV3_5G005690/CsaV3_1G006150/CsaV3_3G030270/CsaV3_6G042080/CsaV3_4G007230/CsaV3_6G038660/CsaV3_7G026150/CsaV3_2G031090/CsaV3_4G028050/CsaV3_3G001070/CsaV3_3G038830/CsaV3_4G031600/CsaV3_7G006750/CsaV3_4G0…	41	3	CsaV3_5G005690/CsaV3_4G007230/CsaV3_6G038660	38	CsaV3_6G051630/CsaV3_7G029940/CsaV3_6G053180/CsaV3_7G000210/CsaV3_6G016510/CsaV3_5G039570/CsaV3_3G006750/CsaV3_4G033030/CsaV3_5G035370/CsaV3_1G002970/CsaV3_2G010800/CsaV3_6G008170/CsaV3_2G003500/CsaV3_1G006150/CsaV3_3G030270/CsaV3_6G042080/CsaV3_7G026150/CsaV3_2G031090/CsaV3_4G028050/CsaV3_3G001070/CsaV3_3G038830/CsaV3_4G031600/CsaV3_7G006750/CsaV3_4G012090/CsaV3_2G003690/CsaV3_4G012100/CsaV3_6G0…
BP	GO:1901566	organonitrogen compound biosynthetic process	324/3437	484/5812	0.000137828	0.0287371	CsaV3_2G007750/CsaV3_7G029140/CsaV3_1G031480/CsaV3_4G004440/CsaV3_3G007170/CsaV3_5G029770/CsaV3_4G004050/CsaV3_5G008790/CsaV3_5G029740/CsaV3_3G037470/CsaV3_6G048680/CsaV3_1G038800/CsaV3_7G003720/CsaV3_3G037450/CsaV3_1G000080/CsaV3_7G021470/CsaV3_3G012600/CsaV3_5G001510/CsaV3_3G003150/CsaV3_7G003030/CsaV3_6G003670/CsaV3_3G015390/CsaV3_3G020560/CsaV3_2G013510/CsaV3_3G041590/CsaV3_3G032360/CsaV3_7G0…	CsaV3_2G007750/CsaV3_7G029140/CsaV3_1G031480/CsaV3_4G004440/CsaV3_3G007170/CsaV3_5G029770/CsaV3_4G004050/CsaV3_5G008790/CsaV3_5G029740/CsaV3_3G037470/CsaV3_6G048680/CsaV3_1G038800/CsaV3_7G003720/CsaV3_3G037450/CsaV3_1G000080/CsaV3_7G021470/CsaV3_3G012600/CsaV3_5G001510/CsaV3_3G003150/CsaV3_7G003030/CsaV3_6G003670/CsaV3_3G015390/CsaV3_3G020560/CsaV3_2G013510/CsaV3_3G041590/CsaV3_3G032360/CsaV3_7G0…	324	55	CsaV3_2G007750/CsaV3_7G029140/CsaV3_1G031480/CsaV3_5G029740/CsaV3_7G003720/CsaV3_7G021470/CsaV3_7G003030/CsaV3_6G003670/CsaV3_3G020560/CsaV3_7G021830/CsaV3_6G003290/CsaV3_7G018620/CsaV3_3G021030/CsaV3_1G042920/CsaV3_5G023920/CsaV3_6G007510/CsaV3_7G030560/CsaV3_2G025670/CsaV3_6G021500/CsaV3_1G000670/CsaV3_1G008060/CsaV3_5G031040/CsaV3_6G045310/CsaV3_5G038360/CsaV3_3G005110/CsaV3_5G035760/CsaV3_6G0…	269	CsaV3_4G004440/CsaV3_3G007170/CsaV3_5G029770/CsaV3_4G004050/CsaV3_5G008790/CsaV3_3G037470/CsaV3_6G048680/CsaV3_1G038800/CsaV3_3G037450/CsaV3_1G000080/CsaV3_3G012600/CsaV3_5G001510/CsaV3_3G003150/CsaV3_3G015390/CsaV3_2G013510/CsaV3_3G041590/CsaV3_3G032360/CsaV3_7G005980/CsaV3_6G051400/CsaV3_6G002550/CsaV3_5G004330/CsaV3_4G007420/CsaV3_3G040500/CsaV3_7G031330/CsaV3_3G015690/CsaV3_3G013840/CsaV3_2G0…
BP	GO:0043604	amide biosynthetic process	194/3437	283/5812	0.000512056	0.0525663	CsaV3_4G004440/CsaV3_5G029770/CsaV3_4G004050/CsaV3_5G008790/CsaV3_5G029740/CsaV3_3G037470/CsaV3_1G038800/CsaV3_7G003720/CsaV3_3G037450/CsaV3_3G012600/CsaV3_3G003150/CsaV3_7G003030/CsaV3_6G003670/CsaV3_2G013510/CsaV3_3G032360/CsaV3_6G051400/CsaV3_6G002550/CsaV3_5G004330/CsaV3_7G021830/CsaV3_4G007420/CsaV3_7G031330/CsaV3_3G015690/CsaV3_2G019510/CsaV3_6G021530/CsaV3_5G001930/CsaV3_6G002260/CsaV3_3G0…	CsaV3_4G004440/CsaV3_5G029770/CsaV3_4G004050/CsaV3_5G008790/CsaV3_5G029740/CsaV3_3G037470/CsaV3_1G038800/CsaV3_7G003720/CsaV3_3G037450/CsaV3_3G012600/CsaV3_3G003150/CsaV3_7G003030/CsaV3_6G003670/CsaV3_2G013510/CsaV3_3G032360/CsaV3_6G051400/CsaV3_6G002550/CsaV3_5G004330/CsaV3_7G021830/CsaV3_4G007420/CsaV3_7G031330/CsaV3_3G015690/CsaV3_2G019510/CsaV3_6G021530/CsaV3_5G001930/CsaV3_6G002260/CsaV3_3G0…	194	23	CsaV3_5G029740/CsaV3_7G003720/CsaV3_7G003030/CsaV3_6G003670/CsaV3_7G021830/CsaV3_6G007510/CsaV3_5G038360/CsaV3_3G005110/CsaV3_1G009580/CsaV3_UNG209180/CsaV3_5G026430/CsaV3_4G031980/CsaV3_4G036580/CsaV3_4G002110/CsaV3_1G023010/CsaV3_5G001820/CsaV3_6G007500/CsaV3_1G028950/CsaV3_7G008490/CsaV3_7G002750/CsaV3_6G036910/CsaV3_6G013470/CsaV3_4G001790	171	CsaV3_4G004440/CsaV3_5G029770/CsaV3_4G004050/CsaV3_5G008790/CsaV3_3G037470/CsaV3_1G038800/CsaV3_3G037450/CsaV3_3G012600/CsaV3_3G003150/CsaV3_2G013510/CsaV3_3G032360/CsaV3_6G051400/CsaV3_6G002550/CsaV3_5G004330/CsaV3_4G007420/CsaV3_7G031330/CsaV3_3G015690/CsaV3_2G019510/CsaV3_6G021530/CsaV3_5G001930/CsaV3_6G002260/CsaV3_3G022680/CsaV3_5G026230/CsaV3_2G004340/CsaV3_4G034910/CsaV3_1G029200/CsaV3_3G0…
BP	GO:0043043	peptide biosynthetic process	186/3437	271/5812	0.000604731	0.0525663	CsaV3_4G004440/CsaV3_5G029770/CsaV3_4G004050/CsaV3_5G008790/CsaV3_5G029740/CsaV3_3G037470/CsaV3_1G038800/CsaV3_7G003720/CsaV3_3G037450/CsaV3_3G012600/CsaV3_3G003150/CsaV3_7G003030/CsaV3_6G003670/CsaV3_2G013510/CsaV3_3G032360/CsaV3_6G051400/CsaV3_6G002550/CsaV3_5G004330/CsaV3_7G021830/CsaV3_4G007420/CsaV3_7G031330/CsaV3_3G015690/CsaV3_2G019510/CsaV3_6G021530/CsaV3_5G001930/CsaV3_6G002260/CsaV3_3G0…	CsaV3_4G004440/CsaV3_5G029770/CsaV3_4G004050/CsaV3_5G008790/CsaV3_5G029740/CsaV3_3G037470/CsaV3_1G038800/CsaV3_7G003720/CsaV3_3G037450/CsaV3_3G012600/CsaV3_3G003150/CsaV3_7G003030/CsaV3_6G003670/CsaV3_2G013510/CsaV3_3G032360/CsaV3_6G051400/CsaV3_6G002550/CsaV3_5G004330/CsaV3_7G021830/CsaV3_4G007420/CsaV3_7G031330/CsaV3_3G015690/CsaV3_2G019510/CsaV3_6G021530/CsaV3_5G001930/CsaV3_6G002260/CsaV3_3G0…	186	22	CsaV3_5G029740/CsaV3_7G003720/CsaV3_7G003030/CsaV3_6G003670/CsaV3_7G021830/CsaV3_6G007510/CsaV3_5G038360/CsaV3_3G005110/CsaV3_1G009580/CsaV3_UNG209180/CsaV3_5G026430/CsaV3_4G031980/CsaV3_4G036580/CsaV3_4G002110/CsaV3_1G023010/CsaV3_5G001820/CsaV3_6G007500/CsaV3_1G028950/CsaV3_7G008490/CsaV3_7G002750/CsaV3_6G013470/CsaV3_4G001790	164	CsaV3_4G004440/CsaV3_5G029770/CsaV3_4G004050/CsaV3_5G008790/CsaV3_3G037470/CsaV3_1G038800/CsaV3_3G037450/CsaV3_3G012600/CsaV3_3G003150/CsaV3_2G013510/CsaV3_3G032360/CsaV3_6G051400/CsaV3_6G002550/CsaV3_5G004330/CsaV3_4G007420/CsaV3_7G031330/CsaV3_3G015690/CsaV3_2G019510/CsaV3_6G021530/CsaV3_5G001930/CsaV3_6G002260/CsaV3_3G022680/CsaV3_5G026230/CsaV3_2G004340/CsaV3_4G034910/CsaV3_1G029200/CsaV3_3G0…
BP	GO:0006412	translation	184/3437	268/5812	0.000630291	0.0525663	CsaV3_4G004440/CsaV3_5G029770/CsaV3_4G004050/CsaV3_5G008790/CsaV3_5G029740/CsaV3_3G037470/CsaV3_1G038800/CsaV3_7G003720/CsaV3_3G037450/CsaV3_3G012600/CsaV3_3G003150/CsaV3_7G003030/CsaV3_6G003670/CsaV3_2G013510/CsaV3_3G032360/CsaV3_6G051400/CsaV3_6G002550/CsaV3_5G004330/CsaV3_7G021830/CsaV3_4G007420/CsaV3_7G031330/CsaV3_3G015690/CsaV3_2G019510/CsaV3_6G021530/CsaV3_5G001930/CsaV3_6G002260/CsaV3_3G0…	CsaV3_4G004440/CsaV3_5G029770/CsaV3_4G004050/CsaV3_5G008790/CsaV3_5G029740/CsaV3_3G037470/CsaV3_1G038800/CsaV3_7G003720/CsaV3_3G037450/CsaV3_3G012600/CsaV3_3G003150/CsaV3_7G003030/CsaV3_6G003670/CsaV3_2G013510/CsaV3_3G032360/CsaV3_6G051400/CsaV3_6G002550/CsaV3_5G004330/CsaV3_7G021830/CsaV3_4G007420/CsaV3_7G031330/CsaV3_3G015690/CsaV3_2G019510/CsaV3_6G021530/CsaV3_5G001930/CsaV3_6G002260/CsaV3_3G0…	184	20	CsaV3_5G029740/CsaV3_7G003720/CsaV3_7G003030/CsaV3_6G003670/CsaV3_7G021830/CsaV3_5G038360/CsaV3_3G005110/CsaV3_1G009580/CsaV3_UNG209180/CsaV3_5G026430/CsaV3_4G031980/CsaV3_4G036580/CsaV3_4G002110/CsaV3_1G023010/CsaV3_5G001820/CsaV3_1G028950/CsaV3_7G008490/CsaV3_7G002750/CsaV3_6G013470/CsaV3_4G001790	164	CsaV3_4G004440/CsaV3_5G029770/CsaV3_4G004050/CsaV3_5G008790/CsaV3_3G037470/CsaV3_1G038800/CsaV3_3G037450/CsaV3_3G012600/CsaV3_3G003150/CsaV3_2G013510/CsaV3_3G032360/CsaV3_6G051400/CsaV3_6G002550/CsaV3_5G004330/CsaV3_4G007420/CsaV3_7G031330/CsaV3_3G015690/CsaV3_2G019510/CsaV3_6G021530/CsaV3_5G001930/CsaV3_6G002260/CsaV3_3G022680/CsaV3_5G026230/CsaV3_2G004340/CsaV3_4G034910/CsaV3_1G029200/CsaV3_3G0…
BP	GO:0043603	cellular amide metabolic process	200/3437	295/5812	0.00103418	0.0683142	CsaV3_4G004440/CsaV3_5G029770/CsaV3_4G004050/CsaV3_5G008790/CsaV3_5G029740/CsaV3_3G037470/CsaV3_1G038800/CsaV3_7G003720/CsaV3_3G037450/CsaV3_3G012600/CsaV3_3G003150/CsaV3_7G003030/CsaV3_6G003670/CsaV3_2G013510/CsaV3_3G032360/CsaV3_6G051400/CsaV3_6G002550/CsaV3_5G004330/CsaV3_7G021830/CsaV3_4G007420/CsaV3_7G031330/CsaV3_3G015690/CsaV3_2G019510/CsaV3_6G021530/CsaV3_5G001930/CsaV3_6G002260/CsaV3_3G0…	CsaV3_4G004440/CsaV3_5G029770/CsaV3_4G004050/CsaV3_5G008790/CsaV3_5G029740/CsaV3_3G037470/CsaV3_1G038800/CsaV3_7G003720/CsaV3_3G037450/CsaV3_3G012600/CsaV3_3G003150/CsaV3_7G003030/CsaV3_6G003670/CsaV3_2G013510/CsaV3_3G032360/CsaV3_6G051400/CsaV3_6G002550/CsaV3_5G004330/CsaV3_7G021830/CsaV3_4G007420/CsaV3_7G031330/CsaV3_3G015690/CsaV3_2G019510/CsaV3_6G021530/CsaV3_5G001930/CsaV3_6G002260/CsaV3_3G0…	200	26	CsaV3_5G029740/CsaV3_7G003720/CsaV3_7G003030/CsaV3_6G003670/CsaV3_7G021830/CsaV3_6G007510/CsaV3_5G038360/CsaV3_3G005110/CsaV3_2G001680/CsaV3_6G048550/CsaV3_1G009580/CsaV3_UNG209180/CsaV3_5G026430/CsaV3_4G031980/CsaV3_4G036580/CsaV3_4G002110/CsaV3_1G023010/CsaV3_5G001820/CsaV3_6G007500/CsaV3_1G028950/CsaV3_7G008490/CsaV3_7G002750/CsaV3_6G036910/CsaV3_6G013470/CsaV3_4G001790/CsaV3_5G030350	174	CsaV3_4G004440/CsaV3_5G029770/CsaV3_4G004050/CsaV3_5G008790/CsaV3_3G037470/CsaV3_1G038800/CsaV3_3G037450/CsaV3_3G012600/CsaV3_3G003150/CsaV3_2G013510/CsaV3_3G032360/CsaV3_6G051400/CsaV3_6G002550/CsaV3_5G004330/CsaV3_4G007420/CsaV3_7G031330/CsaV3_3G015690/CsaV3_2G019510/CsaV3_6G021530/CsaV3_5G001930/CsaV3_6G002260/CsaV3_3G022680/CsaV3_5G026230/CsaV3_2G004340/CsaV3_4G034910/CsaV3_1G029200/CsaV3_3G0…
BP	GO:0006518	peptide metabolic process	189/3437	278/5812	0.00114676	0.0683142	CsaV3_4G004440/CsaV3_5G029770/CsaV3_4G004050/CsaV3_5G008790/CsaV3_5G029740/CsaV3_3G037470/CsaV3_1G038800/CsaV3_7G003720/CsaV3_3G037450/CsaV3_3G012600/CsaV3_3G003150/CsaV3_7G003030/CsaV3_6G003670/CsaV3_2G013510/CsaV3_3G032360/CsaV3_6G051400/CsaV3_6G002550/CsaV3_5G004330/CsaV3_7G021830/CsaV3_4G007420/CsaV3_7G031330/CsaV3_3G015690/CsaV3_2G019510/CsaV3_6G021530/CsaV3_5G001930/CsaV3_6G002260/CsaV3_3G0…	CsaV3_4G004440/CsaV3_5G029770/CsaV3_4G004050/CsaV3_5G008790/CsaV3_5G029740/CsaV3_3G037470/CsaV3_1G038800/CsaV3_7G003720/CsaV3_3G037450/CsaV3_3G012600/CsaV3_3G003150/CsaV3_7G003030/CsaV3_6G003670/CsaV3_2G013510/CsaV3_3G032360/CsaV3_6G051400/CsaV3_6G002550/CsaV3_5G004330/CsaV3_7G021830/CsaV3_4G007420/CsaV3_7G031330/CsaV3_3G015690/CsaV3_2G019510/CsaV3_6G021530/CsaV3_5G001930/CsaV3_6G002260/CsaV3_3G0…	189	24	CsaV3_5G029740/CsaV3_7G003720/CsaV3_7G003030/CsaV3_6G003670/CsaV3_7G021830/CsaV3_6G007510/CsaV3_5G038360/CsaV3_3G005110/CsaV3_2G001680/CsaV3_1G009580/CsaV3_UNG209180/CsaV3_5G026430/CsaV3_4G031980/CsaV3_4G036580/CsaV3_4G002110/CsaV3_1G023010/CsaV3_5G001820/CsaV3_6G007500/CsaV3_1G028950/CsaV3_7G008490/CsaV3_7G002750/CsaV3_6G013470/CsaV3_4G001790/CsaV3_5G030350	165	CsaV3_4G004440/CsaV3_5G029770/CsaV3_4G004050/CsaV3_5G008790/CsaV3_3G037470/CsaV3_1G038800/CsaV3_3G037450/CsaV3_3G012600/CsaV3_3G003150/CsaV3_2G013510/CsaV3_3G032360/CsaV3_6G051400/CsaV3_6G002550/CsaV3_5G004330/CsaV3_4G007420/CsaV3_7G031330/CsaV3_3G015690/CsaV3_2G019510/CsaV3_6G021530/CsaV3_5G001930/CsaV3_6G002260/CsaV3_3G022680/CsaV3_5G026230/CsaV3_2G004340/CsaV3_4G034910/CsaV3_1G029200/CsaV3_3G0…
BP	GO:0019362	pyridine nucleotide metabolic process	32/3437	40/5812	0.00434068	0.150169	CsaV3_6G048680/CsaV3_7G021470/CsaV3_3G021780/CsaV3_6G013500/CsaV3_1G042920/CsaV3_7G022930/CsaV3_5G028490/CsaV3_2G013320/CsaV3_6G040390/CsaV3_6G040430/CsaV3_2G004240/CsaV3_4G006330/CsaV3_1G037750/CsaV3_1G035920/CsaV3_1G003090/CsaV3_6G040330/CsaV3_4G037690/CsaV3_6G034080/CsaV3_4G008960/CsaV3_3G036910/CsaV3_2G030420/CsaV3_2G028640/CsaV3_4G000040/CsaV3_5G034910/CsaV3_1G039980/CsaV3_3G035920/CsaV3_1G0…	CsaV3_6G048680/CsaV3_7G021470/CsaV3_3G021780/CsaV3_6G013500/CsaV3_1G042920/CsaV3_7G022930/CsaV3_5G028490/CsaV3_2G013320/CsaV3_6G040390/CsaV3_6G040430/CsaV3_2G004240/CsaV3_4G006330/CsaV3_1G037750/CsaV3_1G035920/CsaV3_1G003090/CsaV3_6G040330/CsaV3_4G037690/CsaV3_6G034080/CsaV3_4G008960/CsaV3_3G036910/CsaV3_2G030420/CsaV3_2G028640/CsaV3_4G000040/CsaV3_5G034910/CsaV3_1G039980/CsaV3_3G035920/CsaV3_1G0…	32	9	CsaV3_7G021470/CsaV3_1G042920/CsaV3_5G028490/CsaV3_6G034080/CsaV3_5G034910/CsaV3_3G035920/CsaV3_1G008930/CsaV3_5G029170/CsaV3_3G023460	23	CsaV3_6G048680/CsaV3_3G021780/CsaV3_6G013500/CsaV3_7G022930/CsaV3_2G013320/CsaV3_6G040390/CsaV3_6G040430/CsaV3_2G004240/CsaV3_4G006330/CsaV3_1G037750/CsaV3_1G035920/CsaV3_1G003090/CsaV3_6G040330/CsaV3_4G037690/CsaV3_4G008960/CsaV3_3G036910/CsaV3_2G030420/CsaV3_2G028640/CsaV3_4G000040/CsaV3_1G039980/CsaV3_2G015280/CsaV3_5G013570/CsaV3_5G028690
BP	GO:0046496	nicotinamide nucleotide metabolic process	32/3437	40/5812	0.00434068	0.150169	CsaV3_6G048680/CsaV3_7G021470/CsaV3_3G021780/CsaV3_6G013500/CsaV3_1G042920/CsaV3_7G022930/CsaV3_5G028490/CsaV3_2G013320/CsaV3_6G040390/CsaV3_6G040430/CsaV3_2G004240/CsaV3_4G006330/CsaV3_1G037750/CsaV3_1G035920/CsaV3_1G003090/CsaV3_6G040330/CsaV3_4G037690/CsaV3_6G034080/CsaV3_4G008960/CsaV3_3G036910/CsaV3_2G030420/CsaV3_2G028640/CsaV3_4G000040/CsaV3_5G034910/CsaV3_1G039980/CsaV3_3G035920/CsaV3_1G0…	CsaV3_6G048680/CsaV3_7G021470/CsaV3_3G021780/CsaV3_6G013500/CsaV3_1G042920/CsaV3_7G022930/CsaV3_5G028490/CsaV3_2G013320/CsaV3_6G040390/CsaV3_6G040430/CsaV3_2G004240/CsaV3_4G006330/CsaV3_1G037750/CsaV3_1G035920/CsaV3_1G003090/CsaV3_6G040330/CsaV3_4G037690/CsaV3_6G034080/CsaV3_4G008960/CsaV3_3G036910/CsaV3_2G030420/CsaV3_2G028640/CsaV3_4G000040/CsaV3_5G034910/CsaV3_1G039980/CsaV3_3G035920/CsaV3_1G0…	32	9	CsaV3_7G021470/CsaV3_1G042920/CsaV3_5G028490/CsaV3_6G034080/CsaV3_5G034910/CsaV3_3G035920/CsaV3_1G008930/CsaV3_5G029170/CsaV3_3G023460	23	CsaV3_6G048680/CsaV3_3G021780/CsaV3_6G013500/CsaV3_7G022930/CsaV3_2G013320/CsaV3_6G040390/CsaV3_6G040430/CsaV3_2G004240/CsaV3_4G006330/CsaV3_1G037750/CsaV3_1G035920/CsaV3_1G003090/CsaV3_6G040330/CsaV3_4G037690/CsaV3_4G008960/CsaV3_3G036910/CsaV3_2G030420/CsaV3_2G028640/CsaV3_4G000040/CsaV3_1G039980/CsaV3_2G015280/CsaV3_5G013570/CsaV3_5G028690
BP	GO:0009166	nucleotide catabolic process	24/3437	29/5812	0.0060799	0.150169	CsaV3_6G048680/CsaV3_7G021470/CsaV3_3G021780/CsaV3_6G013500/CsaV3_7G022930/CsaV3_2G013320/CsaV3_6G040390/CsaV3_6G040430/CsaV3_1G035920/CsaV3_1G003090/CsaV3_6G040330/CsaV3_4G037690/CsaV3_4G008960/CsaV3_3G036910/CsaV3_2G030420/CsaV3_2G028640/CsaV3_4G000040/CsaV3_1G041450/CsaV3_1G039980/CsaV3_3G035920/CsaV3_5G029170/CsaV3_3G023460/CsaV3_2G015280/CsaV3_5G028690	CsaV3_6G048680/CsaV3_7G021470/CsaV3_3G021780/CsaV3_6G013500/CsaV3_7G022930/CsaV3_2G013320/CsaV3_6G040390/CsaV3_6G040430/CsaV3_1G035920/CsaV3_1G003090/CsaV3_6G040330/CsaV3_4G037690/CsaV3_4G008960/CsaV3_3G036910/CsaV3_2G030420/CsaV3_2G028640/CsaV3_4G000040/CsaV3_1G041450/CsaV3_1G039980/CsaV3_3G035920/CsaV3_5G029170/CsaV3_3G023460/CsaV3_2G015280/CsaV3_5G028690	24	5	CsaV3_7G021470/CsaV3_1G041450/CsaV3_3G035920/CsaV3_5G029170/CsaV3_3G023460	19	CsaV3_6G048680/CsaV3_3G021780/CsaV3_6G013500/CsaV3_7G022930/CsaV3_2G013320/CsaV3_6G040390/CsaV3_6G040430/CsaV3_1G035920/CsaV3_1G003090/CsaV3_6G040330/CsaV3_4G037690/CsaV3_4G008960/CsaV3_3G036910/CsaV3_2G030420/CsaV3_2G028640/CsaV3_4G000040/CsaV3_1G039980/CsaV3_2G015280/CsaV3_5G028690
BP	GO:1901292	nucleoside phosphate catabolic process	24/3437	29/5812	0.0060799	0.150169	CsaV3_6G048680/CsaV3_7G021470/CsaV3_3G021780/CsaV3_6G013500/CsaV3_7G022930/CsaV3_2G013320/CsaV3_6G040390/CsaV3_6G040430/CsaV3_1G035920/CsaV3_1G003090/CsaV3_6G040330/CsaV3_4G037690/CsaV3_4G008960/CsaV3_3G036910/CsaV3_2G030420/CsaV3_2G028640/CsaV3_4G000040/CsaV3_1G041450/CsaV3_1G039980/CsaV3_3G035920/CsaV3_5G029170/CsaV3_3G023460/CsaV3_2G015280/CsaV3_5G028690	CsaV3_6G048680/CsaV3_7G021470/CsaV3_3G021780/CsaV3_6G013500/CsaV3_7G022930/CsaV3_2G013320/CsaV3_6G040390/CsaV3_6G040430/CsaV3_1G035920/CsaV3_1G003090/CsaV3_6G040330/CsaV3_4G037690/CsaV3_4G008960/CsaV3_3G036910/CsaV3_2G030420/CsaV3_2G028640/CsaV3_4G000040/CsaV3_1G041450/CsaV3_1G039980/CsaV3_3G035920/CsaV3_5G029170/CsaV3_3G023460/CsaV3_2G015280/CsaV3_5G028690	24	5	CsaV3_7G021470/CsaV3_1G041450/CsaV3_3G035920/CsaV3_5G029170/CsaV3_3G023460	19	CsaV3_6G048680/CsaV3_3G021780/CsaV3_6G013500/CsaV3_7G022930/CsaV3_2G013320/CsaV3_6G040390/CsaV3_6G040430/CsaV3_1G035920/CsaV3_1G003090/CsaV3_6G040330/CsaV3_4G037690/CsaV3_4G008960/CsaV3_3G036910/CsaV3_2G030420/CsaV3_2G028640/CsaV3_4G000040/CsaV3_1G039980/CsaV3_2G015280/CsaV3_5G028690
CC	GO:0005840	ribosome	144/1280	195/2095	6.10627e-05	0.00653371	CsaV3_4G004440/CsaV3_5G029770/CsaV3_4G004050/CsaV3_5G008790/CsaV3_3G037470/CsaV3_1G038800/CsaV3_3G037450/CsaV3_3G012600/CsaV3_3G003150/CsaV3_2G013510/CsaV3_3G032360/CsaV3_6G051400/CsaV3_6G002550/CsaV3_5G004330/CsaV3_4G007420/CsaV3_7G031330/CsaV3_3G015690/CsaV3_2G019510/CsaV3_6G021530/CsaV3_5G001930/CsaV3_6G002260/CsaV3_3G022680/CsaV3_5G026230/CsaV3_7G023770/CsaV3_2G004340/CsaV3_4G034910/CsaV3_1G0…	CsaV3_4G004440/CsaV3_5G029770/CsaV3_4G004050/CsaV3_5G008790/CsaV3_3G037470/CsaV3_1G038800/CsaV3_3G037450/CsaV3_3G012600/CsaV3_3G003150/CsaV3_2G013510/CsaV3_3G032360/CsaV3_6G051400/CsaV3_6G002550/CsaV3_5G004330/CsaV3_4G007420/CsaV3_7G031330/CsaV3_3G015690/CsaV3_2G019510/CsaV3_6G021530/CsaV3_5G001930/CsaV3_6G002260/CsaV3_3G022680/CsaV3_5G026230/CsaV3_7G023770/CsaV3_2G004340/CsaV3_4G034910/CsaV3_1G0…	144	7	CsaV3_5G038360/CsaV3_UNG209180/CsaV3_4G031980/CsaV3_4G002110/CsaV3_7G008490/CsaV3_6G013470/CsaV3_4G001790	137	CsaV3_4G004440/CsaV3_5G029770/CsaV3_4G004050/CsaV3_5G008790/CsaV3_3G037470/CsaV3_1G038800/CsaV3_3G037450/CsaV3_3G012600/CsaV3_3G003150/CsaV3_2G013510/CsaV3_3G032360/CsaV3_6G051400/CsaV3_6G002550/CsaV3_5G004330/CsaV3_4G007420/CsaV3_7G031330/CsaV3_3G015690/CsaV3_2G019510/CsaV3_6G021530/CsaV3_5G001930/CsaV3_6G002260/CsaV3_3G022680/CsaV3_5G026230/CsaV3_7G023770/CsaV3_2G004340/CsaV3_4G034910/CsaV3_1G0…
CC	GO:0043228	non-membrane-bounded organelle	196/1280	278/2095	0.000294984	0.0105211	CsaV3_4G004440/CsaV3_5G029770/CsaV3_4G004050/CsaV3_5G008790/CsaV3_3G037470/CsaV3_1G038800/CsaV3_3G037450/CsaV3_3G012600/CsaV3_5G028310/CsaV3_3G003150/CsaV3_2G013510/CsaV3_3G032360/CsaV3_2G030640/CsaV3_6G051400/CsaV3_6G002550/CsaV3_5G004330/CsaV3_4G007420/CsaV3_2G010800/CsaV3_7G031330/CsaV3_3G015690/CsaV3_2G019510/CsaV3_6G021530/CsaV3_5G001930/CsaV3_6G002260/CsaV3_3G022680/CsaV3_5G026230/CsaV3_5G0…	CsaV3_4G004440/CsaV3_5G029770/CsaV3_4G004050/CsaV3_5G008790/CsaV3_3G037470/CsaV3_1G038800/CsaV3_3G037450/CsaV3_3G012600/CsaV3_5G028310/CsaV3_3G003150/CsaV3_2G013510/CsaV3_3G032360/CsaV3_2G030640/CsaV3_6G051400/CsaV3_6G002550/CsaV3_5G004330/CsaV3_4G007420/CsaV3_2G010800/CsaV3_7G031330/CsaV3_3G015690/CsaV3_2G019510/CsaV3_6G021530/CsaV3_5G001930/CsaV3_6G002260/CsaV3_3G022680/CsaV3_5G026230/CsaV3_5G0…	196	28	CsaV3_2G030640/CsaV3_5G027160/CsaV3_4G000180/CsaV3_1G008740/CsaV3_3G034500/CsaV3_5G038360/CsaV3_6G038660/CsaV3_3G011790/CsaV3_7G030020/CsaV3_7G031590/CsaV3_UNG209180/CsaV3_1G003570/CsaV3_1G008070/CsaV3_4G031980/CsaV3_5G002400/CsaV3_2G009440/CsaV3_6G007240/CsaV3_1G000640/CsaV3_5G029000/CsaV3_4G002110/CsaV3_6G031920/CsaV3_5G000730/CsaV3_3G015610/CsaV3_7G008490/CsaV3_7G032300/CsaV3_3G004550/CsaV3_6G…	168	CsaV3_4G004440/CsaV3_5G029770/CsaV3_4G004050/CsaV3_5G008790/CsaV3_3G037470/CsaV3_1G038800/CsaV3_3G037450/CsaV3_3G012600/CsaV3_5G028310/CsaV3_3G003150/CsaV3_2G013510/CsaV3_3G032360/CsaV3_6G051400/CsaV3_6G002550/CsaV3_5G004330/CsaV3_4G007420/CsaV3_2G010800/CsaV3_7G031330/CsaV3_3G015690/CsaV3_2G019510/CsaV3_6G021530/CsaV3_5G001930/CsaV3_6G002260/CsaV3_3G022680/CsaV3_5G026230/CsaV3_7G023770/CsaV3_2G0…
CC	GO:0043232	intracellular non-membrane-bounded organelle	196/1280	278/2095	0.000294984	0.0105211	CsaV3_4G004440/CsaV3_5G029770/CsaV3_4G004050/CsaV3_5G008790/CsaV3_3G037470/CsaV3_1G038800/CsaV3_3G037450/CsaV3_3G012600/CsaV3_5G028310/CsaV3_3G003150/CsaV3_2G013510/CsaV3_3G032360/CsaV3_2G030640/CsaV3_6G051400/CsaV3_6G002550/CsaV3_5G004330/CsaV3_4G007420/CsaV3_2G010800/CsaV3_7G031330/CsaV3_3G015690/CsaV3_2G019510/CsaV3_6G021530/CsaV3_5G001930/CsaV3_6G002260/CsaV3_3G022680/CsaV3_5G026230/CsaV3_5G0…	CsaV3_4G004440/CsaV3_5G029770/CsaV3_4G004050/CsaV3_5G008790/CsaV3_3G037470/CsaV3_1G038800/CsaV3_3G037450/CsaV3_3G012600/CsaV3_5G028310/CsaV3_3G003150/CsaV3_2G013510/CsaV3_3G032360/CsaV3_2G030640/CsaV3_6G051400/CsaV3_6G002550/CsaV3_5G004330/CsaV3_4G007420/CsaV3_2G010800/CsaV3_7G031330/CsaV3_3G015690/CsaV3_2G019510/CsaV3_6G021530/CsaV3_5G001930/CsaV3_6G002260/CsaV3_3G022680/CsaV3_5G026230/CsaV3_5G0…	196	28	CsaV3_2G030640/CsaV3_5G027160/CsaV3_4G000180/CsaV3_1G008740/CsaV3_3G034500/CsaV3_5G038360/CsaV3_6G038660/CsaV3_3G011790/CsaV3_7G030020/CsaV3_7G031590/CsaV3_UNG209180/CsaV3_1G003570/CsaV3_1G008070/CsaV3_4G031980/CsaV3_5G002400/CsaV3_2G009440/CsaV3_6G007240/CsaV3_1G000640/CsaV3_5G029000/CsaV3_4G002110/CsaV3_6G031920/CsaV3_5G000730/CsaV3_3G015610/CsaV3_7G008490/CsaV3_7G032300/CsaV3_3G004550/CsaV3_6G…	168	CsaV3_4G004440/CsaV3_5G029770/CsaV3_4G004050/CsaV3_5G008790/CsaV3_3G037470/CsaV3_1G038800/CsaV3_3G037450/CsaV3_3G012600/CsaV3_5G028310/CsaV3_3G003150/CsaV3_2G013510/CsaV3_3G032360/CsaV3_6G051400/CsaV3_6G002550/CsaV3_5G004330/CsaV3_4G007420/CsaV3_2G010800/CsaV3_7G031330/CsaV3_3G015690/CsaV3_2G019510/CsaV3_6G021530/CsaV3_5G001930/CsaV3_6G002260/CsaV3_3G022680/CsaV3_5G026230/CsaV3_7G023770/CsaV3_2G0…
CC	GO:1990904	ribonucleoprotein complex	157/1280	221/2095	0.000733152	0.0196118	CsaV3_4G004440/CsaV3_5G029770/CsaV3_4G004050/CsaV3_5G008790/CsaV3_3G037470/CsaV3_1G038800/CsaV3_3G037450/CsaV3_3G012600/CsaV3_3G003150/CsaV3_2G013510/CsaV3_3G032360/CsaV3_6G051400/CsaV3_6G002550/CsaV3_5G004330/CsaV3_4G007420/CsaV3_7G031330/CsaV3_3G015690/CsaV3_2G019510/CsaV3_6G021530/CsaV3_5G001930/CsaV3_6G002260/CsaV3_3G022680/CsaV3_5G026230/CsaV3_7G023770/CsaV3_2G004340/CsaV3_4G034910/CsaV3_1G0…	CsaV3_4G004440/CsaV3_5G029770/CsaV3_4G004050/CsaV3_5G008790/CsaV3_3G037470/CsaV3_1G038800/CsaV3_3G037450/CsaV3_3G012600/CsaV3_3G003150/CsaV3_2G013510/CsaV3_3G032360/CsaV3_6G051400/CsaV3_6G002550/CsaV3_5G004330/CsaV3_4G007420/CsaV3_7G031330/CsaV3_3G015690/CsaV3_2G019510/CsaV3_6G021530/CsaV3_5G001930/CsaV3_6G002260/CsaV3_3G022680/CsaV3_5G026230/CsaV3_7G023770/CsaV3_2G004340/CsaV3_4G034910/CsaV3_1G0…	157	13	CsaV3_5G038360/CsaV3_7G028060/CsaV3_UNG209180/CsaV3_4G031980/CsaV3_2G008750/CsaV3_1G000640/CsaV3_4G002110/CsaV3_3G040290/CsaV3_7G008490/CsaV3_6G013470/CsaV3_6G033830/CsaV3_4G001790/CsaV3_5G024970	144	CsaV3_4G004440/CsaV3_5G029770/CsaV3_4G004050/CsaV3_5G008790/CsaV3_3G037470/CsaV3_1G038800/CsaV3_3G037450/CsaV3_3G012600/CsaV3_3G003150/CsaV3_2G013510/CsaV3_3G032360/CsaV3_6G051400/CsaV3_6G002550/CsaV3_5G004330/CsaV3_4G007420/CsaV3_7G031330/CsaV3_3G015690/CsaV3_2G019510/CsaV3_6G021530/CsaV3_5G001930/CsaV3_6G002260/CsaV3_3G022680/CsaV3_5G026230/CsaV3_7G023770/CsaV3_2G004340/CsaV3_4G034910/CsaV3_1G0…
CC	GO:0000228	nuclear chromosome	9/1280	71498	0.0529965	0.727119	CsaV3_2G010800/CsaV3_4G010560/CsaV3_7G030020/CsaV3_6G001130/CsaV3_5G005010/CsaV3_2G009440/CsaV3_2G006800/CsaV3_3G015610/CsaV3_7G032300	CsaV3_2G010800/CsaV3_4G010560/CsaV3_7G030020/CsaV3_6G001130/CsaV3_5G005010/CsaV3_2G009440/CsaV3_2G006800/CsaV3_3G015610/CsaV3_7G032300	9	4	CsaV3_7G030020/CsaV3_2G009440/CsaV3_3G015610/CsaV3_7G032300	5	CsaV3_2G010800/CsaV3_4G010560/CsaV3_6G001130/CsaV3_5G005010/CsaV3_2G006800
CC	GO:0000502	proteasome complex	16/1280	20/2095	0.0611843	0.727119	CsaV3_4G031710/CsaV3_1G046270/CsaV3_4G032560/CsaV3_3G009670/CsaV3_3G000690/CsaV3_4G025500/CsaV3_7G001120/CsaV3_7G034340/CsaV3_3G013100/CsaV3_6G021700/CsaV3_6G047290/CsaV3_6G032330/CsaV3_6G006240/novel.211/CsaV3_2G028900/CsaV3_2G031230	CsaV3_4G031710/CsaV3_1G046270/CsaV3_4G032560/CsaV3_3G009670/CsaV3_3G000690/CsaV3_4G025500/CsaV3_7G001120/CsaV3_7G034340/CsaV3_3G013100/CsaV3_6G021700/CsaV3_6G047290/CsaV3_6G032330/CsaV3_6G006240/-/CsaV3_2G028900/CsaV3_2G031230	16	0		16	CsaV3_4G031710/CsaV3_1G046270/CsaV3_4G032560/CsaV3_3G009670/CsaV3_3G000690/CsaV3_4G025500/CsaV3_7G001120/CsaV3_7G034340/CsaV3_3G013100/CsaV3_6G021700/CsaV3_6G047290/CsaV3_6G032330/CsaV3_6G006240/novel.211/CsaV3_2G028900/CsaV3_2G031230
CC	GO:1905369	endopeptidase complex	16/1280	20/2095	0.0611843	0.727119	CsaV3_4G031710/CsaV3_1G046270/CsaV3_4G032560/CsaV3_3G009670/CsaV3_3G000690/CsaV3_4G025500/CsaV3_7G001120/CsaV3_7G034340/CsaV3_3G013100/CsaV3_6G021700/CsaV3_6G047290/CsaV3_6G032330/CsaV3_6G006240/novel.211/CsaV3_2G028900/CsaV3_2G031230	CsaV3_4G031710/CsaV3_1G046270/CsaV3_4G032560/CsaV3_3G009670/CsaV3_3G000690/CsaV3_4G025500/CsaV3_7G001120/CsaV3_7G034340/CsaV3_3G013100/CsaV3_6G021700/CsaV3_6G047290/CsaV3_6G032330/CsaV3_6G006240/-/CsaV3_2G028900/CsaV3_2G031230	16	0		16	CsaV3_4G031710/CsaV3_1G046270/CsaV3_4G032560/CsaV3_3G009670/CsaV3_3G000690/CsaV3_4G025500/CsaV3_7G001120/CsaV3_7G034340/CsaV3_3G013100/CsaV3_6G021700/CsaV3_6G047290/CsaV3_6G032330/CsaV3_6G006240/novel.211/CsaV3_2G028900/CsaV3_2G031230
MF	GO:0005198	structural molecule activity	156/5086	212/8671	3.26761e-06	0.000921467	CsaV3_4G004440/CsaV3_5G029770/CsaV3_4G004050/CsaV3_5G008790/CsaV3_3G037470/CsaV3_1G038800/CsaV3_3G037450/CsaV3_3G012600/CsaV3_3G003150/CsaV3_2G013510/CsaV3_3G032360/CsaV3_6G051400/CsaV3_6G002550/CsaV3_5G004330/CsaV3_4G007420/CsaV3_7G031330/CsaV3_3G015690/CsaV3_2G019510/CsaV3_6G021530/CsaV3_5G001930/CsaV3_6G002260/CsaV3_3G022680/CsaV3_5G026230/CsaV3_4G026140/CsaV3_2G004340/CsaV3_4G034910/CsaV3_1G0…	CsaV3_4G004440/CsaV3_5G029770/CsaV3_4G004050/CsaV3_5G008790/CsaV3_3G037470/CsaV3_1G038800/CsaV3_3G037450/CsaV3_3G012600/CsaV3_3G003150/CsaV3_2G013510/CsaV3_3G032360/CsaV3_6G051400/CsaV3_6G002550/CsaV3_5G004330/CsaV3_4G007420/CsaV3_7G031330/CsaV3_3G015690/CsaV3_2G019510/CsaV3_6G021530/CsaV3_5G001930/CsaV3_6G002260/CsaV3_3G022680/CsaV3_5G026230/CsaV3_4G026140/CsaV3_2G004340/CsaV3_4G034910/CsaV3_1G0…	156	10	CsaV3_4G026140/CsaV3_5G038360/CsaV3_UNG209180/CsaV3_4G031980/CsaV3_6G038790/CsaV3_4G002110/CsaV3_6G050000/CsaV3_7G008490/CsaV3_6G013470/CsaV3_4G001790	146	CsaV3_4G004440/CsaV3_5G029770/CsaV3_4G004050/CsaV3_5G008790/CsaV3_3G037470/CsaV3_1G038800/CsaV3_3G037450/CsaV3_3G012600/CsaV3_3G003150/CsaV3_2G013510/CsaV3_3G032360/CsaV3_6G051400/CsaV3_6G002550/CsaV3_5G004330/CsaV3_4G007420/CsaV3_7G031330/CsaV3_3G015690/CsaV3_2G019510/CsaV3_6G021530/CsaV3_5G001930/CsaV3_6G002260/CsaV3_3G022680/CsaV3_5G026230/CsaV3_2G004340/CsaV3_4G034910/CsaV3_1G029200/CsaV3_3G0…
MF	GO:0003735	structural constituent of ribosome	145/5086	198/8671	1.11895e-05	0.00157771	CsaV3_4G004440/CsaV3_5G029770/CsaV3_4G004050/CsaV3_5G008790/CsaV3_3G037470/CsaV3_1G038800/CsaV3_3G037450/CsaV3_3G012600/CsaV3_3G003150/CsaV3_2G013510/CsaV3_3G032360/CsaV3_6G051400/CsaV3_6G002550/CsaV3_5G004330/CsaV3_4G007420/CsaV3_7G031330/CsaV3_3G015690/CsaV3_2G019510/CsaV3_6G021530/CsaV3_5G001930/CsaV3_6G002260/CsaV3_3G022680/CsaV3_5G026230/CsaV3_2G004340/CsaV3_4G034910/CsaV3_1G029200/CsaV3_3G0…	CsaV3_4G004440/CsaV3_5G029770/CsaV3_4G004050/CsaV3_5G008790/CsaV3_3G037470/CsaV3_1G038800/CsaV3_3G037450/CsaV3_3G012600/CsaV3_3G003150/CsaV3_2G013510/CsaV3_3G032360/CsaV3_6G051400/CsaV3_6G002550/CsaV3_5G004330/CsaV3_4G007420/CsaV3_7G031330/CsaV3_3G015690/CsaV3_2G019510/CsaV3_6G021530/CsaV3_5G001930/CsaV3_6G002260/CsaV3_3G022680/CsaV3_5G026230/CsaV3_2G004340/CsaV3_4G034910/CsaV3_1G029200/CsaV3_3G0…	145	7	CsaV3_5G038360/CsaV3_UNG209180/CsaV3_4G031980/CsaV3_4G002110/CsaV3_7G008490/CsaV3_6G013470/CsaV3_4G001790	138	CsaV3_4G004440/CsaV3_5G029770/CsaV3_4G004050/CsaV3_5G008790/CsaV3_3G037470/CsaV3_1G038800/CsaV3_3G037450/CsaV3_3G012600/CsaV3_3G003150/CsaV3_2G013510/CsaV3_3G032360/CsaV3_6G051400/CsaV3_6G002550/CsaV3_5G004330/CsaV3_4G007420/CsaV3_7G031330/CsaV3_3G015690/CsaV3_2G019510/CsaV3_6G021530/CsaV3_5G001930/CsaV3_6G002260/CsaV3_3G022680/CsaV3_5G026230/CsaV3_2G004340/CsaV3_4G034910/CsaV3_1G029200/CsaV3_3G0…
MF	GO:0043565	sequence-specific DNA binding	115/5086	168/8671	0.00528944	0.23295	CsaV3_6G044440/CsaV3_1G014770/CsaV3_1G004720/CsaV3_3G033350/CsaV3_2G026630/CsaV3_7G003290/CsaV3_7G008500/CsaV3_2G001400/CsaV3_2G035630/CsaV3_6G048830/CsaV3_3G026920/CsaV3_6G046080/CsaV3_3G042290/CsaV3_3G008170/CsaV3_3G008360/CsaV3_5G037920/CsaV3_3G036820/CsaV3_1G041950/CsaV3_7G031430/CsaV3_5G014520/CsaV3_4G003030/CsaV3_4G005280/CsaV3_7G005750/CsaV3_2G030170/CsaV3_3G016950/CsaV3_2G034600/CsaV3_2G0…	CsaV3_6G044440/CsaV3_1G014770/CsaV3_1G004720/CsaV3_3G033350/CsaV3_2G026630/CsaV3_7G003290/CsaV3_7G008500/CsaV3_2G001400/CsaV3_2G035630/CsaV3_6G048830/CsaV3_3G026920/CsaV3_6G046080/CsaV3_3G042290/CsaV3_3G008170/CsaV3_3G008360/CsaV3_5G037920/CsaV3_3G036820/CsaV3_1G041950/CsaV3_7G031430/CsaV3_5G014520/CsaV3_4G003030/CsaV3_4G005280/CsaV3_7G005750/CsaV3_2G030170/CsaV3_3G016950/CsaV3_2G034600/CsaV3_2G0…	115	80	CsaV3_6G044440/CsaV3_1G014770/CsaV3_1G004720/CsaV3_3G033350/CsaV3_2G026630/CsaV3_7G008500/CsaV3_2G001400/CsaV3_2G035630/CsaV3_6G048830/CsaV3_3G026920/CsaV3_6G046080/CsaV3_3G042290/CsaV3_3G008170/CsaV3_3G008360/CsaV3_5G037920/CsaV3_3G036820/CsaV3_1G041950/CsaV3_7G031430/CsaV3_5G014520/CsaV3_4G003030/CsaV3_7G005750/CsaV3_2G030170/CsaV3_3G016950/CsaV3_2G015250/CsaV3_3G039880/CsaV3_7G000510/CsaV3_6G0…	35	CsaV3_7G003290/CsaV3_4G005280/CsaV3_2G034600/CsaV3_5G032510/CsaV3_1G043540/CsaV3_2G004160/CsaV3_6G004560/CsaV3_6G050950/CsaV3_3G033000/CsaV3_4G035230/CsaV3_6G022580/CsaV3_3G015960/CsaV3_3G023720/CsaV3_7G035390/CsaV3_6G013120/CsaV3_2G025510/CsaV3_3G007560/CsaV3_6G052610/CsaV3_3G048530/CsaV3_4G034470/CsaV3_2G012140/CsaV3_3G049820/CsaV3_2G026600/CsaV3_6G033890/CsaV3_6G046850/CsaV3_4G033330/CsaV3_7G0…
MF	GO:0001883	purine nucleoside binding	101/5086	147/8671	0.007301	0.23295	CsaV3_7G029920/CsaV3_2G002140/CsaV3_2G033270/CsaV3_6G022210/CsaV3_3G042540/CsaV3_3G042530/CsaV3_5G027290/CsaV3_3G012770/CsaV3_7G027900/CsaV3_7G005760/CsaV3_7G021710/CsaV3_1G004280/CsaV3_4G005500/CsaV3_3G006490/CsaV3_4G014740/CsaV3_3G043530/CsaV3_5G003900/CsaV3_6G051030/CsaV3_2G034580/CsaV3_2G007560/CsaV3_3G045540/CsaV3_5G020040/CsaV3_1G001110/CsaV3_2G021030/CsaV3_3G049890/CsaV3_1G044700/CsaV3_4G0…	CsaV3_7G029920/CsaV3_2G002140/CsaV3_2G033270/CsaV3_6G022210/CsaV3_3G042540/CsaV3_3G042530/CsaV3_5G027290/CsaV3_3G012770/CsaV3_7G027900/CsaV3_7G005760/CsaV3_7G021710/CsaV3_1G004280/CsaV3_4G005500/CsaV3_3G006490/CsaV3_4G014740/CsaV3_3G043530/CsaV3_5G003900/CsaV3_6G051030/CsaV3_2G034580/CsaV3_2G007560/CsaV3_3G045540/CsaV3_5G020040/CsaV3_1G001110/CsaV3_2G021030/CsaV3_3G049890/CsaV3_1G044700/CsaV3_4G0…	101	46	CsaV3_7G029920/CsaV3_5G027290/CsaV3_3G012770/CsaV3_7G027900/CsaV3_7G005760/CsaV3_7G021710/CsaV3_4G014740/CsaV3_2G007560/CsaV3_2G021030/CsaV3_3G049890/CsaV3_1G044700/CsaV3_4G001160/CsaV3_2G031840/CsaV3_3G032290/CsaV3_4G030600/CsaV3_7G028150/CsaV3_1G033100/CsaV3_3G027620/CsaV3_6G045420/CsaV3_6G008600/CsaV3_6G050550/CsaV3_4G003850/CsaV3_3G033660/CsaV3_3G036220/CsaV3_4G023560/CsaV3_1G015390/CsaV3_4G0…	55	CsaV3_2G002140/CsaV3_2G033270/CsaV3_6G022210/CsaV3_3G042540/CsaV3_3G042530/CsaV3_1G004280/CsaV3_4G005500/CsaV3_3G006490/CsaV3_3G043530/CsaV3_5G003900/CsaV3_6G051030/CsaV3_2G034580/CsaV3_3G045540/CsaV3_5G020040/CsaV3_1G001110/CsaV3_2G011610/CsaV3_6G032280/CsaV3_4G008100/CsaV3_7G027640/CsaV3_2G016330/CsaV3_6G015750/CsaV3_3G047350/CsaV3_6G050460/CsaV3_2G026130/CsaV3_3G039710/CsaV3_5G031510/CsaV3_6G0…
MF	GO:0005525	GTP binding	101/5086	147/8671	0.007301	0.23295	CsaV3_7G029920/CsaV3_2G002140/CsaV3_2G033270/CsaV3_6G022210/CsaV3_3G042540/CsaV3_3G042530/CsaV3_5G027290/CsaV3_3G012770/CsaV3_7G027900/CsaV3_7G005760/CsaV3_7G021710/CsaV3_1G004280/CsaV3_4G005500/CsaV3_3G006490/CsaV3_4G014740/CsaV3_3G043530/CsaV3_5G003900/CsaV3_6G051030/CsaV3_2G034580/CsaV3_2G007560/CsaV3_3G045540/CsaV3_5G020040/CsaV3_1G001110/CsaV3_2G021030/CsaV3_3G049890/CsaV3_1G044700/CsaV3_4G0…	CsaV3_7G029920/CsaV3_2G002140/CsaV3_2G033270/CsaV3_6G022210/CsaV3_3G042540/CsaV3_3G042530/CsaV3_5G027290/CsaV3_3G012770/CsaV3_7G027900/CsaV3_7G005760/CsaV3_7G021710/CsaV3_1G004280/CsaV3_4G005500/CsaV3_3G006490/CsaV3_4G014740/CsaV3_3G043530/CsaV3_5G003900/CsaV3_6G051030/CsaV3_2G034580/CsaV3_2G007560/CsaV3_3G045540/CsaV3_5G020040/CsaV3_1G001110/CsaV3_2G021030/CsaV3_3G049890/CsaV3_1G044700/CsaV3_4G0…	101	46	CsaV3_7G029920/CsaV3_5G027290/CsaV3_3G012770/CsaV3_7G027900/CsaV3_7G005760/CsaV3_7G021710/CsaV3_4G014740/CsaV3_2G007560/CsaV3_2G021030/CsaV3_3G049890/CsaV3_1G044700/CsaV3_4G001160/CsaV3_2G031840/CsaV3_3G032290/CsaV3_4G030600/CsaV3_7G028150/CsaV3_1G033100/CsaV3_3G027620/CsaV3_6G045420/CsaV3_6G008600/CsaV3_6G050550/CsaV3_4G003850/CsaV3_3G033660/CsaV3_3G036220/CsaV3_4G023560/CsaV3_1G015390/CsaV3_4G0…	55	CsaV3_2G002140/CsaV3_2G033270/CsaV3_6G022210/CsaV3_3G042540/CsaV3_3G042530/CsaV3_1G004280/CsaV3_4G005500/CsaV3_3G006490/CsaV3_3G043530/CsaV3_5G003900/CsaV3_6G051030/CsaV3_2G034580/CsaV3_3G045540/CsaV3_5G020040/CsaV3_1G001110/CsaV3_2G011610/CsaV3_6G032280/CsaV3_4G008100/CsaV3_7G027640/CsaV3_2G016330/CsaV3_6G015750/CsaV3_3G047350/CsaV3_6G050460/CsaV3_2G026130/CsaV3_3G039710/CsaV3_5G031510/CsaV3_6G0…
MF	GO:0032549	ribonucleoside binding	101/5086	147/8671	0.007301	0.23295	CsaV3_7G029920/CsaV3_2G002140/CsaV3_2G033270/CsaV3_6G022210/CsaV3_3G042540/CsaV3_3G042530/CsaV3_5G027290/CsaV3_3G012770/CsaV3_7G027900/CsaV3_7G005760/CsaV3_7G021710/CsaV3_1G004280/CsaV3_4G005500/CsaV3_3G006490/CsaV3_4G014740/CsaV3_3G043530/CsaV3_5G003900/CsaV3_6G051030/CsaV3_2G034580/CsaV3_2G007560/CsaV3_3G045540/CsaV3_5G020040/CsaV3_1G001110/CsaV3_2G021030/CsaV3_3G049890/CsaV3_1G044700/CsaV3_4G0…	CsaV3_7G029920/CsaV3_2G002140/CsaV3_2G033270/CsaV3_6G022210/CsaV3_3G042540/CsaV3_3G042530/CsaV3_5G027290/CsaV3_3G012770/CsaV3_7G027900/CsaV3_7G005760/CsaV3_7G021710/CsaV3_1G004280/CsaV3_4G005500/CsaV3_3G006490/CsaV3_4G014740/CsaV3_3G043530/CsaV3_5G003900/CsaV3_6G051030/CsaV3_2G034580/CsaV3_2G007560/CsaV3_3G045540/CsaV3_5G020040/CsaV3_1G001110/CsaV3_2G021030/CsaV3_3G049890/CsaV3_1G044700/CsaV3_4G0…	101	46	CsaV3_7G029920/CsaV3_5G027290/CsaV3_3G012770/CsaV3_7G027900/CsaV3_7G005760/CsaV3_7G021710/CsaV3_4G014740/CsaV3_2G007560/CsaV3_2G021030/CsaV3_3G049890/CsaV3_1G044700/CsaV3_4G001160/CsaV3_2G031840/CsaV3_3G032290/CsaV3_4G030600/CsaV3_7G028150/CsaV3_1G033100/CsaV3_3G027620/CsaV3_6G045420/CsaV3_6G008600/CsaV3_6G050550/CsaV3_4G003850/CsaV3_3G033660/CsaV3_3G036220/CsaV3_4G023560/CsaV3_1G015390/CsaV3_4G0…	55	CsaV3_2G002140/CsaV3_2G033270/CsaV3_6G022210/CsaV3_3G042540/CsaV3_3G042530/CsaV3_1G004280/CsaV3_4G005500/CsaV3_3G006490/CsaV3_3G043530/CsaV3_5G003900/CsaV3_6G051030/CsaV3_2G034580/CsaV3_3G045540/CsaV3_5G020040/CsaV3_1G001110/CsaV3_2G011610/CsaV3_6G032280/CsaV3_4G008100/CsaV3_7G027640/CsaV3_2G016330/CsaV3_6G015750/CsaV3_3G047350/CsaV3_6G050460/CsaV3_2G026130/CsaV3_3G039710/CsaV3_5G031510/CsaV3_6G0…
MF	GO:0032550	purine ribonucleoside binding	101/5086	147/8671	0.007301	0.23295	CsaV3_7G029920/CsaV3_2G002140/CsaV3_2G033270/CsaV3_6G022210/CsaV3_3G042540/CsaV3_3G042530/CsaV3_5G027290/CsaV3_3G012770/CsaV3_7G027900/CsaV3_7G005760/CsaV3_7G021710/CsaV3_1G004280/CsaV3_4G005500/CsaV3_3G006490/CsaV3_4G014740/CsaV3_3G043530/CsaV3_5G003900/CsaV3_6G051030/CsaV3_2G034580/CsaV3_2G007560/CsaV3_3G045540/CsaV3_5G020040/CsaV3_1G001110/CsaV3_2G021030/CsaV3_3G049890/CsaV3_1G044700/CsaV3_4G0…	CsaV3_7G029920/CsaV3_2G002140/CsaV3_2G033270/CsaV3_6G022210/CsaV3_3G042540/CsaV3_3G042530/CsaV3_5G027290/CsaV3_3G012770/CsaV3_7G027900/CsaV3_7G005760/CsaV3_7G021710/CsaV3_1G004280/CsaV3_4G005500/CsaV3_3G006490/CsaV3_4G014740/CsaV3_3G043530/CsaV3_5G003900/CsaV3_6G051030/CsaV3_2G034580/CsaV3_2G007560/CsaV3_3G045540/CsaV3_5G020040/CsaV3_1G001110/CsaV3_2G021030/CsaV3_3G049890/CsaV3_1G044700/CsaV3_4G0…	101	46	CsaV3_7G029920/CsaV3_5G027290/CsaV3_3G012770/CsaV3_7G027900/CsaV3_7G005760/CsaV3_7G021710/CsaV3_4G014740/CsaV3_2G007560/CsaV3_2G021030/CsaV3_3G049890/CsaV3_1G044700/CsaV3_4G001160/CsaV3_2G031840/CsaV3_3G032290/CsaV3_4G030600/CsaV3_7G028150/CsaV3_1G033100/CsaV3_3G027620/CsaV3_6G045420/CsaV3_6G008600/CsaV3_6G050550/CsaV3_4G003850/CsaV3_3G033660/CsaV3_3G036220/CsaV3_4G023560/CsaV3_1G015390/CsaV3_4G0…	55	CsaV3_2G002140/CsaV3_2G033270/CsaV3_6G022210/CsaV3_3G042540/CsaV3_3G042530/CsaV3_1G004280/CsaV3_4G005500/CsaV3_3G006490/CsaV3_3G043530/CsaV3_5G003900/CsaV3_6G051030/CsaV3_2G034580/CsaV3_3G045540/CsaV3_5G020040/CsaV3_1G001110/CsaV3_2G011610/CsaV3_6G032280/CsaV3_4G008100/CsaV3_7G027640/CsaV3_2G016330/CsaV3_6G015750/CsaV3_3G047350/CsaV3_6G050460/CsaV3_2G026130/CsaV3_3G039710/CsaV3_5G031510/CsaV3_6G0…
MF	GO:0032561	guanyl ribonucleotide binding	101/5086	147/8671	0.007301	0.23295	CsaV3_7G029920/CsaV3_2G002140/CsaV3_2G033270/CsaV3_6G022210/CsaV3_3G042540/CsaV3_3G042530/CsaV3_5G027290/CsaV3_3G012770/CsaV3_7G027900/CsaV3_7G005760/CsaV3_7G021710/CsaV3_1G004280/CsaV3_4G005500/CsaV3_3G006490/CsaV3_4G014740/CsaV3_3G043530/CsaV3_5G003900/CsaV3_6G051030/CsaV3_2G034580/CsaV3_2G007560/CsaV3_3G045540/CsaV3_5G020040/CsaV3_1G001110/CsaV3_2G021030/CsaV3_3G049890/CsaV3_1G044700/CsaV3_4G0…	CsaV3_7G029920/CsaV3_2G002140/CsaV3_2G033270/CsaV3_6G022210/CsaV3_3G042540/CsaV3_3G042530/CsaV3_5G027290/CsaV3_3G012770/CsaV3_7G027900/CsaV3_7G005760/CsaV3_7G021710/CsaV3_1G004280/CsaV3_4G005500/CsaV3_3G006490/CsaV3_4G014740/CsaV3_3G043530/CsaV3_5G003900/CsaV3_6G051030/CsaV3_2G034580/CsaV3_2G007560/CsaV3_3G045540/CsaV3_5G020040/CsaV3_1G001110/CsaV3_2G021030/CsaV3_3G049890/CsaV3_1G044700/CsaV3_4G0…	101	46	CsaV3_7G029920/CsaV3_5G027290/CsaV3_3G012770/CsaV3_7G027900/CsaV3_7G005760/CsaV3_7G021710/CsaV3_4G014740/CsaV3_2G007560/CsaV3_2G021030/CsaV3_3G049890/CsaV3_1G044700/CsaV3_4G001160/CsaV3_2G031840/CsaV3_3G032290/CsaV3_4G030600/CsaV3_7G028150/CsaV3_1G033100/CsaV3_3G027620/CsaV3_6G045420/CsaV3_6G008600/CsaV3_6G050550/CsaV3_4G003850/CsaV3_3G033660/CsaV3_3G036220/CsaV3_4G023560/CsaV3_1G015390/CsaV3_4G0…	55	CsaV3_2G002140/CsaV3_2G033270/CsaV3_6G022210/CsaV3_3G042540/CsaV3_3G042530/CsaV3_1G004280/CsaV3_4G005500/CsaV3_3G006490/CsaV3_3G043530/CsaV3_5G003900/CsaV3_6G051030/CsaV3_2G034580/CsaV3_3G045540/CsaV3_5G020040/CsaV3_1G001110/CsaV3_2G011610/CsaV3_6G032280/CsaV3_4G008100/CsaV3_7G027640/CsaV3_2G016330/CsaV3_6G015750/CsaV3_3G047350/CsaV3_6G050460/CsaV3_2G026130/CsaV3_3G039710/CsaV3_5G031510/CsaV3_6G0…
MF	GO:0003774	motor activity	42/5086	56/8671	0.00794404	0.23295	CsaV3_1G033760/CsaV3_2G015170/CsaV3_7G000280/CsaV3_4G005820/CsaV3_7G033280/CsaV3_1G024160/CsaV3_2G014220/CsaV3_4G034600/CsaV3_7G000390/CsaV3_6G000140/CsaV3_4G001020/CsaV3_7G031590/CsaV3_6G034290/CsaV3_5G002790/CsaV3_2G025940/CsaV3_3G004460/CsaV3_3G047980/CsaV3_7G021510/CsaV3_3G044360/CsaV3_1G003530/CsaV3_3G037420/CsaV3_2G029620/CsaV3_6G007240/CsaV3_3G015910/CsaV3_6G045040/CsaV3_2G005260/CsaV3_5G0…	CsaV3_1G033760/CsaV3_2G015170/CsaV3_7G000280/CsaV3_4G005820/CsaV3_7G033280/CsaV3_1G024160/CsaV3_2G014220/CsaV3_4G034600/CsaV3_7G000390/CsaV3_6G000140/CsaV3_4G001020/CsaV3_7G031590/CsaV3_6G034290/CsaV3_5G002790/CsaV3_2G025940/CsaV3_3G004460/CsaV3_3G047980/CsaV3_7G021510/CsaV3_3G044360/CsaV3_1G003530/CsaV3_3G037420/CsaV3_2G029620/CsaV3_6G007240/CsaV3_3G015910/CsaV3_6G045040/CsaV3_2G005260/CsaV3_5G0…	42	7	CsaV3_7G000390/CsaV3_7G031590/CsaV3_6G007240/CsaV3_5G029000/CsaV3_6G031920/CsaV3_5G000730/CsaV3_4G022100	35	CsaV3_1G033760/CsaV3_2G015170/CsaV3_7G000280/CsaV3_4G005820/CsaV3_7G033280/CsaV3_1G024160/CsaV3_2G014220/CsaV3_4G034600/CsaV3_6G000140/CsaV3_4G001020/CsaV3_6G034290/CsaV3_5G002790/CsaV3_2G025940/CsaV3_3G004460/CsaV3_3G047980/CsaV3_7G021510/CsaV3_3G044360/CsaV3_1G003530/CsaV3_3G037420/CsaV3_2G029620/CsaV3_3G015910/CsaV3_6G045040/CsaV3_2G005260/CsaV3_1G011320/CsaV3_1G006890/CsaV3_4G007670/CsaV3_4G0…
MF	GO:0008092	cytoskeletal protein binding	61/5086	85/8671	0.00826064	0.23295	CsaV3_6G016270/CsaV3_4G011660/CsaV3_1G033760/CsaV3_2G015170/CsaV3_2G008570/CsaV3_7G000280/CsaV3_4G029360/CsaV3_4G005820/CsaV3_7G033280/CsaV3_1G024160/CsaV3_2G013610/CsaV3_2G014220/CsaV3_4G034600/CsaV3_7G000390/CsaV3_6G000140/CsaV3_1G041970/CsaV3_7G027820/CsaV3_4G001020/CsaV3_6G034290/CsaV3_5G002790/CsaV3_2G025940/CsaV3_3G004460/CsaV3_3G047980/CsaV3_7G021510/CsaV3_5G015790/CsaV3_1G003530/CsaV3_3G0…	CsaV3_6G016270/CsaV3_4G011660/CsaV3_1G033760/CsaV3_2G015170/CsaV3_2G008570/CsaV3_7G000280/CsaV3_4G029360/CsaV3_4G005820/CsaV3_7G033280/CsaV3_1G024160/CsaV3_2G013610/CsaV3_2G014220/CsaV3_4G034600/CsaV3_7G000390/CsaV3_6G000140/CsaV3_1G041970/CsaV3_7G027820/CsaV3_4G001020/CsaV3_6G034290/CsaV3_5G002790/CsaV3_2G025940/CsaV3_3G004460/CsaV3_3G047980/CsaV3_7G021510/CsaV3_5G015790/CsaV3_1G003530/CsaV3_3G0…	61	12	CsaV3_4G011660/CsaV3_2G008570/CsaV3_7G000390/CsaV3_1G041970/CsaV3_7G027820/CsaV3_3G009000/CsaV3_4G024760/CsaV3_1G004810/CsaV3_3G035040/CsaV3_4G022100/CsaV3_3G022330/CsaV3_1G033580	49	CsaV3_6G016270/CsaV3_1G033760/CsaV3_2G015170/CsaV3_7G000280/CsaV3_4G029360/CsaV3_4G005820/CsaV3_7G033280/CsaV3_1G024160/CsaV3_2G013610/CsaV3_2G014220/CsaV3_4G034600/CsaV3_6G000140/CsaV3_4G001020/CsaV3_6G034290/CsaV3_5G002790/CsaV3_2G025940/CsaV3_3G004460/CsaV3_3G047980/CsaV3_7G021510/CsaV3_5G015790/CsaV3_1G003530/CsaV3_3G037420/CsaV3_4G036380/CsaV3_2G029620/CsaV3_5G039300/CsaV3_3G015910/CsaV3_6G0…
MF	GO:0001882	nucleoside binding	101/5086	148/8671	0.0098583	0.233854	CsaV3_7G029920/CsaV3_2G002140/CsaV3_2G033270/CsaV3_6G022210/CsaV3_3G042540/CsaV3_3G042530/CsaV3_5G027290/CsaV3_3G012770/CsaV3_7G027900/CsaV3_7G005760/CsaV3_7G021710/CsaV3_1G004280/CsaV3_4G005500/CsaV3_3G006490/CsaV3_4G014740/CsaV3_3G043530/CsaV3_5G003900/CsaV3_6G051030/CsaV3_2G034580/CsaV3_2G007560/CsaV3_3G045540/CsaV3_5G020040/CsaV3_1G001110/CsaV3_2G021030/CsaV3_3G049890/CsaV3_1G044700/CsaV3_4G0…	CsaV3_7G029920/CsaV3_2G002140/CsaV3_2G033270/CsaV3_6G022210/CsaV3_3G042540/CsaV3_3G042530/CsaV3_5G027290/CsaV3_3G012770/CsaV3_7G027900/CsaV3_7G005760/CsaV3_7G021710/CsaV3_1G004280/CsaV3_4G005500/CsaV3_3G006490/CsaV3_4G014740/CsaV3_3G043530/CsaV3_5G003900/CsaV3_6G051030/CsaV3_2G034580/CsaV3_2G007560/CsaV3_3G045540/CsaV3_5G020040/CsaV3_1G001110/CsaV3_2G021030/CsaV3_3G049890/CsaV3_1G044700/CsaV3_4G0…	101	46	CsaV3_7G029920/CsaV3_5G027290/CsaV3_3G012770/CsaV3_7G027900/CsaV3_7G005760/CsaV3_7G021710/CsaV3_4G014740/CsaV3_2G007560/CsaV3_2G021030/CsaV3_3G049890/CsaV3_1G044700/CsaV3_4G001160/CsaV3_2G031840/CsaV3_3G032290/CsaV3_4G030600/CsaV3_7G028150/CsaV3_1G033100/CsaV3_3G027620/CsaV3_6G045420/CsaV3_6G008600/CsaV3_6G050550/CsaV3_4G003850/CsaV3_3G033660/CsaV3_3G036220/CsaV3_4G023560/CsaV3_1G015390/CsaV3_4G0…	55	CsaV3_2G002140/CsaV3_2G033270/CsaV3_6G022210/CsaV3_3G042540/CsaV3_3G042530/CsaV3_1G004280/CsaV3_4G005500/CsaV3_3G006490/CsaV3_3G043530/CsaV3_5G003900/CsaV3_6G051030/CsaV3_2G034580/CsaV3_3G045540/CsaV3_5G020040/CsaV3_1G001110/CsaV3_2G011610/CsaV3_6G032280/CsaV3_4G008100/CsaV3_7G027640/CsaV3_2G016330/CsaV3_6G015750/CsaV3_3G047350/CsaV3_6G050460/CsaV3_2G026130/CsaV3_3G039710/CsaV3_5G031510/CsaV3_6G0…
MF	GO:0016874	ligase activity	58/5086	81/8671	0.0106452	0.233854	CsaV3_3G013840/CsaV3_5G002730/CsaV3_3G021030/CsaV3_5G023920/CsaV3_2G008510/CsaV3_7G030560/CsaV3_1G000670/CsaV3_1G038230/CsaV3_3G048470/CsaV3_5G002770/CsaV3_4G010360/CsaV3_3G009890/CsaV3_2G016280/CsaV3_6G008710/CsaV3_6G016090/CsaV3_1G009770/CsaV3_6G040130/CsaV3_1G039630/CsaV3_1G042270/CsaV3_1G012830/CsaV3_3G002020/CsaV3_1G039910/CsaV3_2G034930/CsaV3_2G011140/CsaV3_3G033280/CsaV3_5G026430/CsaV3_6G0…	CsaV3_3G013840/CsaV3_5G002730/CsaV3_3G021030/CsaV3_5G023920/CsaV3_2G008510/CsaV3_7G030560/CsaV3_1G000670/CsaV3_1G038230/CsaV3_3G048470/CsaV3_5G002770/CsaV3_4G010360/CsaV3_3G009890/CsaV3_2G016280/CsaV3_6G008710/CsaV3_6G016090/CsaV3_1G009770/CsaV3_6G040130/CsaV3_1G039630/CsaV3_1G042270/CsaV3_1G012830/CsaV3_3G002020/CsaV3_1G039910/CsaV3_2G034930/CsaV3_2G011140/CsaV3_3G033280/CsaV3_5G026430/CsaV3_6G0…	58	11	CsaV3_3G021030/CsaV3_5G023920/CsaV3_7G030560/CsaV3_1G000670/CsaV3_4G010360/CsaV3_3G033280/CsaV3_5G026430/CsaV3_5G037300/CsaV3_2G015050/CsaV3_7G002750/CsaV3_6G036910	47	CsaV3_3G013840/CsaV3_5G002730/CsaV3_2G008510/CsaV3_1G038230/CsaV3_3G048470/CsaV3_5G002770/CsaV3_3G009890/CsaV3_2G016280/CsaV3_6G008710/CsaV3_6G016090/CsaV3_1G009770/CsaV3_6G040130/CsaV3_1G039630/CsaV3_1G042270/CsaV3_1G012830/CsaV3_3G002020/CsaV3_1G039910/CsaV3_2G034930/CsaV3_2G011140/CsaV3_6G015970/CsaV3_4G025950/CsaV3_1G003150/CsaV3_3G021950/CsaV3_4G011730/CsaV3_2G012380/CsaV3_7G023220/CsaV3_7G0…
MF	GO:0016836	hydro-lyase activity	22/5086	27/8671	0.0107805	0.233854	CsaV3_5G031570/CsaV3_6G042130/CsaV3_2G030320/CsaV3_6G021500/CsaV3_6G040390/CsaV3_2G013730/CsaV3_1G043650/CsaV3_1G035920/CsaV3_6G014760/CsaV3_2G017780/CsaV3_1G003090/CsaV3_2G033150/CsaV3_6G048980/CsaV3_7G022530/CsaV3_1G028580/CsaV3_2G002430/CsaV3_4G031950/CsaV3_3G013610/CsaV3_2G028140/CsaV3_5G004930/CsaV3_4G014780/CsaV3_3G010140	CsaV3_5G031570/CsaV3_6G042130/CsaV3_2G030320/CsaV3_6G021500/CsaV3_6G040390/CsaV3_2G013730/CsaV3_1G043650/CsaV3_1G035920/CsaV3_6G014760/CsaV3_2G017780/CsaV3_1G003090/CsaV3_2G033150/CsaV3_6G048980/CsaV3_7G022530/CsaV3_1G028580/CsaV3_2G002430/CsaV3_4G031950/CsaV3_3G013610/CsaV3_2G028140/CsaV3_5G004930/CsaV3_4G014780/CsaV3_3G010140	22	4	CsaV3_5G031570/CsaV3_2G030320/CsaV3_6G021500/CsaV3_3G010140	18	CsaV3_6G042130/CsaV3_6G040390/CsaV3_2G013730/CsaV3_1G043650/CsaV3_1G035920/CsaV3_6G014760/CsaV3_2G017780/CsaV3_1G003090/CsaV3_2G033150/CsaV3_6G048980/CsaV3_7G022530/CsaV3_1G028580/CsaV3_2G002430/CsaV3_4G031950/CsaV3_3G013610/CsaV3_2G028140/CsaV3_5G004930/CsaV3_4G014780
MF	GO:0019001	guanyl nucleotide binding	103/5086	152/8671	0.0125113	0.252014	CsaV3_7G029920/CsaV3_2G002140/CsaV3_2G033270/CsaV3_6G022210/CsaV3_3G042540/CsaV3_3G042530/CsaV3_5G027290/CsaV3_3G012770/CsaV3_7G027900/CsaV3_7G005760/CsaV3_7G021710/CsaV3_1G004280/CsaV3_4G005500/CsaV3_3G006490/CsaV3_4G014740/CsaV3_3G043530/CsaV3_5G003900/CsaV3_6G051030/CsaV3_2G034580/CsaV3_2G007560/CsaV3_3G045540/CsaV3_5G020040/CsaV3_1G001110/CsaV3_2G021030/CsaV3_3G049890/CsaV3_1G044700/CsaV3_4G0…	CsaV3_7G029920/CsaV3_2G002140/CsaV3_2G033270/CsaV3_6G022210/CsaV3_3G042540/CsaV3_3G042530/CsaV3_5G027290/CsaV3_3G012770/CsaV3_7G027900/CsaV3_7G005760/CsaV3_7G021710/CsaV3_1G004280/CsaV3_4G005500/CsaV3_3G006490/CsaV3_4G014740/CsaV3_3G043530/CsaV3_5G003900/CsaV3_6G051030/CsaV3_2G034580/CsaV3_2G007560/CsaV3_3G045540/CsaV3_5G020040/CsaV3_1G001110/CsaV3_2G021030/CsaV3_3G049890/CsaV3_1G044700/CsaV3_4G0…	103	48	CsaV3_7G029920/CsaV3_5G027290/CsaV3_3G012770/CsaV3_7G027900/CsaV3_7G005760/CsaV3_7G021710/CsaV3_4G014740/CsaV3_2G007560/CsaV3_2G021030/CsaV3_3G049890/CsaV3_1G044700/CsaV3_4G001160/CsaV3_2G031840/CsaV3_3G032290/CsaV3_4G030600/CsaV3_7G028150/CsaV3_1G033100/CsaV3_3G027620/CsaV3_6G045420/CsaV3_6G008600/CsaV3_2G014330/CsaV3_6G050550/CsaV3_4G003850/CsaV3_3G033660/CsaV3_3G036220/CsaV3_4G023560/CsaV3_1G0…	55	CsaV3_2G002140/CsaV3_2G033270/CsaV3_6G022210/CsaV3_3G042540/CsaV3_3G042530/CsaV3_1G004280/CsaV3_4G005500/CsaV3_3G006490/CsaV3_3G043530/CsaV3_5G003900/CsaV3_6G051030/CsaV3_2G034580/CsaV3_3G045540/CsaV3_5G020040/CsaV3_1G001110/CsaV3_2G011610/CsaV3_6G032280/CsaV3_4G008100/CsaV3_7G027640/CsaV3_2G016330/CsaV3_6G015750/CsaV3_3G047350/CsaV3_6G050460/CsaV3_2G026130/CsaV3_3G039710/CsaV3_5G031510/CsaV3_6G0…
MF	GO:0016861	intramolecular oxidoreductase activity, interconverting aldoses and ketoses	1163969	2473393	0.0156321	0.293883	CsaV3_5G004970/CsaV3_4G031770/CsaV3_5G028490/CsaV3_2G004240/CsaV3_1G037750/CsaV3_2G015690/CsaV3_5G010220/CsaV3_2G030420/CsaV3_2G028640/CsaV3_5G034910/CsaV3_6G016850	CsaV3_5G004970/CsaV3_4G031770/CsaV3_5G028490/CsaV3_2G004240/CsaV3_1G037750/CsaV3_2G015690/CsaV3_5G010220/CsaV3_2G030420/CsaV3_2G028640/CsaV3_5G034910/CsaV3_6G016850	11	2	CsaV3_5G028490/CsaV3_5G034910	9	CsaV3_5G004970/CsaV3_4G031770/CsaV3_2G004240/CsaV3_1G037750/CsaV3_2G015690/CsaV3_5G010220/CsaV3_2G030420/CsaV3_2G028640/CsaV3_6G016850
MF	GO:0016817	hydrolase activity, acting on acid anhydrides	162/5086	249/8671	0.0211583	0.331444	CsaV3_5G037960/CsaV3_3G037240/CsaV3_2G029570/CsaV3_1G043560/CsaV3_1G033760/CsaV3_2G015170/CsaV3_2G033270/CsaV3_4G000720/CsaV3_7G000280/CsaV3_5G040540/CsaV3_5G034810/CsaV3_3G004580/CsaV3_2G009630/CsaV3_3G023620/CsaV3_6G014210/CsaV3_7G007250/CsaV3_4G005820/CsaV3_7G032840/CsaV3_6G038990/CsaV3_7G033280/CsaV3_3G012370/CsaV3_1G024160/CsaV3_4G014740/CsaV3_3G035990/CsaV3_4G024730/CsaV3_3G030270/CsaV3_7G0…	CsaV3_5G037960/CsaV3_3G037240/CsaV3_2G029570/CsaV3_1G043560/CsaV3_1G033760/CsaV3_2G015170/CsaV3_2G033270/CsaV3_4G000720/CsaV3_7G000280/CsaV3_5G040540/CsaV3_5G034810/CsaV3_3G004580/CsaV3_2G009630/CsaV3_3G023620/CsaV3_6G014210/CsaV3_7G007250/CsaV3_4G005820/CsaV3_7G032840/CsaV3_6G038990/CsaV3_7G033280/CsaV3_3G012370/CsaV3_1G024160/CsaV3_4G014740/CsaV3_3G035990/CsaV3_4G024730/CsaV3_3G030270/CsaV3_7G0…	162	69	CsaV3_4G000720/CsaV3_5G040540/CsaV3_2G009630/CsaV3_3G023620/CsaV3_6G014210/CsaV3_6G038990/CsaV3_4G014740/CsaV3_4G024730/CsaV3_7G027360/CsaV3_5G026260/CsaV3_2G007560/CsaV3_6G038660/CsaV3_7G000390/CsaV3_1G002210/CsaV3_6G008400/CsaV3_3G043190/CsaV3_3G038310/CsaV3_3G021800/CsaV3_6G052230/CsaV3_6G000630/novel.401/CsaV3_7G031590/CsaV3_3G010260/CsaV3_2G014330/CsaV3_5G034720/CsaV3_3G002090/CsaV3_4G008940…	93	CsaV3_5G037960/CsaV3_3G037240/CsaV3_2G029570/CsaV3_1G043560/CsaV3_1G033760/CsaV3_2G015170/CsaV3_2G033270/CsaV3_7G000280/CsaV3_5G034810/CsaV3_3G004580/CsaV3_7G007250/CsaV3_4G005820/CsaV3_7G032840/CsaV3_7G033280/CsaV3_3G012370/CsaV3_1G024160/CsaV3_3G035990/CsaV3_3G030270/CsaV3_7G033300/CsaV3_7G029170/CsaV3_2G014220/CsaV3_4G034600/CsaV3_6G035790/CsaV3_1G005960/CsaV3_6G000140/CsaV3_1G031660/CsaV3_6G0…
MF	GO:0016462	pyrophosphatase activity	158/5086	243/8671	0.0232747	0.331444	CsaV3_5G037960/CsaV3_3G037240/CsaV3_2G029570/CsaV3_1G043560/CsaV3_1G033760/CsaV3_2G015170/CsaV3_2G033270/CsaV3_4G000720/CsaV3_7G000280/CsaV3_5G040540/CsaV3_5G034810/CsaV3_3G004580/CsaV3_2G009630/CsaV3_3G023620/CsaV3_6G014210/CsaV3_7G007250/CsaV3_4G005820/CsaV3_7G032840/CsaV3_6G038990/CsaV3_7G033280/CsaV3_1G024160/CsaV3_4G014740/CsaV3_3G035990/CsaV3_4G024730/CsaV3_3G030270/CsaV3_7G027360/CsaV3_7G0…	CsaV3_5G037960/CsaV3_3G037240/CsaV3_2G029570/CsaV3_1G043560/CsaV3_1G033760/CsaV3_2G015170/CsaV3_2G033270/CsaV3_4G000720/CsaV3_7G000280/CsaV3_5G040540/CsaV3_5G034810/CsaV3_3G004580/CsaV3_2G009630/CsaV3_3G023620/CsaV3_6G014210/CsaV3_7G007250/CsaV3_4G005820/CsaV3_7G032840/CsaV3_6G038990/CsaV3_7G033280/CsaV3_1G024160/CsaV3_4G014740/CsaV3_3G035990/CsaV3_4G024730/CsaV3_3G030270/CsaV3_7G027360/CsaV3_7G0…	158	67	CsaV3_4G000720/CsaV3_5G040540/CsaV3_2G009630/CsaV3_3G023620/CsaV3_6G014210/CsaV3_6G038990/CsaV3_4G014740/CsaV3_4G024730/CsaV3_7G027360/CsaV3_5G026260/CsaV3_2G007560/CsaV3_6G038660/CsaV3_7G000390/CsaV3_1G002210/CsaV3_6G008400/CsaV3_3G043190/CsaV3_3G038310/CsaV3_3G021800/CsaV3_6G052230/novel.401/CsaV3_7G031590/CsaV3_3G010260/CsaV3_2G014330/CsaV3_5G034720/CsaV3_3G002090/CsaV3_4G008940/CsaV3_3G019320…	91	CsaV3_5G037960/CsaV3_3G037240/CsaV3_2G029570/CsaV3_1G043560/CsaV3_1G033760/CsaV3_2G015170/CsaV3_2G033270/CsaV3_7G000280/CsaV3_5G034810/CsaV3_3G004580/CsaV3_7G007250/CsaV3_4G005820/CsaV3_7G032840/CsaV3_7G033280/CsaV3_1G024160/CsaV3_3G035990/CsaV3_3G030270/CsaV3_7G033300/CsaV3_7G029170/CsaV3_2G014220/CsaV3_4G034600/CsaV3_6G035790/CsaV3_1G005960/CsaV3_6G000140/CsaV3_1G031660/CsaV3_6G040670/CsaV3_6G0…
MF	GO:0016818	hydrolase activity, acting on acid anhydrides, in phosphorus-containing anhydrides	161/5086	248/8671	0.0238877	0.331444	CsaV3_5G037960/CsaV3_3G037240/CsaV3_2G029570/CsaV3_1G043560/CsaV3_1G033760/CsaV3_2G015170/CsaV3_2G033270/CsaV3_4G000720/CsaV3_7G000280/CsaV3_5G040540/CsaV3_5G034810/CsaV3_3G004580/CsaV3_2G009630/CsaV3_3G023620/CsaV3_6G014210/CsaV3_7G007250/CsaV3_4G005820/CsaV3_7G032840/CsaV3_6G038990/CsaV3_7G033280/CsaV3_3G012370/CsaV3_1G024160/CsaV3_4G014740/CsaV3_3G035990/CsaV3_4G024730/CsaV3_3G030270/CsaV3_7G0…	CsaV3_5G037960/CsaV3_3G037240/CsaV3_2G029570/CsaV3_1G043560/CsaV3_1G033760/CsaV3_2G015170/CsaV3_2G033270/CsaV3_4G000720/CsaV3_7G000280/CsaV3_5G040540/CsaV3_5G034810/CsaV3_3G004580/CsaV3_2G009630/CsaV3_3G023620/CsaV3_6G014210/CsaV3_7G007250/CsaV3_4G005820/CsaV3_7G032840/CsaV3_6G038990/CsaV3_7G033280/CsaV3_3G012370/CsaV3_1G024160/CsaV3_4G014740/CsaV3_3G035990/CsaV3_4G024730/CsaV3_3G030270/CsaV3_7G0…	161	68	CsaV3_4G000720/CsaV3_5G040540/CsaV3_2G009630/CsaV3_3G023620/CsaV3_6G014210/CsaV3_6G038990/CsaV3_4G014740/CsaV3_4G024730/CsaV3_7G027360/CsaV3_5G026260/CsaV3_2G007560/CsaV3_6G038660/CsaV3_7G000390/CsaV3_1G002210/CsaV3_6G008400/CsaV3_3G043190/CsaV3_3G038310/CsaV3_3G021800/CsaV3_6G052230/novel.401/CsaV3_7G031590/CsaV3_3G010260/CsaV3_2G014330/CsaV3_5G034720/CsaV3_3G002090/CsaV3_4G008940/CsaV3_3G019320…	93	CsaV3_5G037960/CsaV3_3G037240/CsaV3_2G029570/CsaV3_1G043560/CsaV3_1G033760/CsaV3_2G015170/CsaV3_2G033270/CsaV3_7G000280/CsaV3_5G034810/CsaV3_3G004580/CsaV3_7G007250/CsaV3_4G005820/CsaV3_7G032840/CsaV3_7G033280/CsaV3_3G012370/CsaV3_1G024160/CsaV3_3G035990/CsaV3_3G030270/CsaV3_7G033300/CsaV3_7G029170/CsaV3_2G014220/CsaV3_4G034600/CsaV3_6G035790/CsaV3_1G005960/CsaV3_6G000140/CsaV3_1G031660/CsaV3_6G0…
MF	GO:0003854	3-beta-hydroxy-delta5-steroid dehydrogenase activity	1163938	2473363	0.024682	0.331444	CsaV3_3G008190/CsaV3_1G029290/CsaV3_4G037630/CsaV3_3G008180/CsaV3_5G027330/CsaV3_6G006190/CsaV3_6G031840/CsaV3_3G015980/CsaV3_2G036590/CsaV3_3G042490	CsaV3_3G008190/CsaV3_1G029290/CsaV3_4G037630/CsaV3_3G008180/CsaV3_5G027330/CsaV3_6G006190/CsaV3_6G031840/CsaV3_3G015980/CsaV3_2G036590/CsaV3_3G042490	10	7	CsaV3_3G008190/CsaV3_1G029290/CsaV3_3G008180/CsaV3_5G027330/CsaV3_6G006190/CsaV3_3G015980/CsaV3_3G042490	3	CsaV3_4G037630/CsaV3_6G031840/CsaV3_2G036590
MF	GO:0016229	steroid dehydrogenase activity	1163938	2473363	0.024682	0.331444	CsaV3_3G008190/CsaV3_1G029290/CsaV3_4G037630/CsaV3_3G008180/CsaV3_5G027330/CsaV3_6G006190/CsaV3_6G031840/CsaV3_3G015980/CsaV3_2G036590/CsaV3_3G042490	CsaV3_3G008190/CsaV3_1G029290/CsaV3_4G037630/CsaV3_3G008180/CsaV3_5G027330/CsaV3_6G006190/CsaV3_6G031840/CsaV3_3G015980/CsaV3_2G036590/CsaV3_3G042490	10	7	CsaV3_3G008190/CsaV3_1G029290/CsaV3_3G008180/CsaV3_5G027330/CsaV3_6G006190/CsaV3_3G015980/CsaV3_3G042490	3	CsaV3_4G037630/CsaV3_6G031840/CsaV3_2G036590
MF	GO:0033764	steroid dehydrogenase activity, acting on the CH-OH group of donors, NAD or NADP as acceptor	1163938	2473363	0.024682	0.331444	CsaV3_3G008190/CsaV3_1G029290/CsaV3_4G037630/CsaV3_3G008180/CsaV3_5G027330/CsaV3_6G006190/CsaV3_6G031840/CsaV3_3G015980/CsaV3_2G036590/CsaV3_3G042490	CsaV3_3G008190/CsaV3_1G029290/CsaV3_4G037630/CsaV3_3G008180/CsaV3_5G027330/CsaV3_6G006190/CsaV3_6G031840/CsaV3_3G015980/CsaV3_2G036590/CsaV3_3G042490	10	7	CsaV3_3G008190/CsaV3_1G029290/CsaV3_3G008180/CsaV3_5G027330/CsaV3_6G006190/CsaV3_3G015980/CsaV3_3G042490	3	CsaV3_4G037630/CsaV3_6G031840/CsaV3_2G036590
MF	GO:0008017	microtubule binding	41/5086	57/8671	0.0264134	0.338572	CsaV3_1G033760/CsaV3_2G015170/CsaV3_7G000280/CsaV3_4G005820/CsaV3_7G033280/CsaV3_1G024160/CsaV3_2G014220/CsaV3_4G034600/CsaV3_7G000390/CsaV3_6G000140/CsaV3_4G001020/CsaV3_6G034290/CsaV3_5G002790/CsaV3_2G025940/CsaV3_3G004460/CsaV3_3G047980/CsaV3_7G021510/CsaV3_5G015790/CsaV3_1G003530/CsaV3_3G037420/CsaV3_4G036380/CsaV3_2G029620/CsaV3_3G015910/CsaV3_6G045040/CsaV3_2G005260/CsaV3_1G005310/CsaV3_1G0…	CsaV3_1G033760/CsaV3_2G015170/CsaV3_7G000280/CsaV3_4G005820/CsaV3_7G033280/CsaV3_1G024160/CsaV3_2G014220/CsaV3_4G034600/CsaV3_7G000390/CsaV3_6G000140/CsaV3_4G001020/CsaV3_6G034290/CsaV3_5G002790/CsaV3_2G025940/CsaV3_3G004460/CsaV3_3G047980/CsaV3_7G021510/CsaV3_5G015790/CsaV3_1G003530/CsaV3_3G037420/CsaV3_4G036380/CsaV3_2G029620/CsaV3_3G015910/CsaV3_6G045040/CsaV3_2G005260/CsaV3_1G005310/CsaV3_1G0…	41	2	CsaV3_7G000390/CsaV3_4G022100	39	CsaV3_1G033760/CsaV3_2G015170/CsaV3_7G000280/CsaV3_4G005820/CsaV3_7G033280/CsaV3_1G024160/CsaV3_2G014220/CsaV3_4G034600/CsaV3_6G000140/CsaV3_4G001020/CsaV3_6G034290/CsaV3_5G002790/CsaV3_2G025940/CsaV3_3G004460/CsaV3_3G047980/CsaV3_7G021510/CsaV3_5G015790/CsaV3_1G003530/CsaV3_3G037420/CsaV3_4G036380/CsaV3_2G029620/CsaV3_3G015910/CsaV3_6G045040/CsaV3_2G005260/CsaV3_1G005310/CsaV3_1G011320/CsaV3_1G0…
MF	GO:0003779	actin binding	19/5086	24/8671	0.0297596	0.364879	CsaV3_6G016270/CsaV3_4G011660/CsaV3_2G008570/CsaV3_4G029360/CsaV3_2G013610/CsaV3_1G041970/CsaV3_7G027820/CsaV3_3G009000/CsaV3_5G039300/CsaV3_4G024760/CsaV3_1G004810/CsaV3_3G035040/CsaV3_3G039310/CsaV3_3G013000/CsaV3_2G015980/CsaV3_3G022330/CsaV3_5G026390/CsaV3_7G023520/CsaV3_1G033580	CsaV3_6G016270/CsaV3_4G011660/CsaV3_2G008570/CsaV3_4G029360/CsaV3_2G013610/CsaV3_1G041970/CsaV3_7G027820/CsaV3_3G009000/CsaV3_5G039300/CsaV3_4G024760/CsaV3_1G004810/CsaV3_3G035040/CsaV3_3G039310/CsaV3_3G013000/CsaV3_2G015980/CsaV3_3G022330/CsaV3_5G026390/CsaV3_7G023520/CsaV3_1G033580	19	10	CsaV3_4G011660/CsaV3_2G008570/CsaV3_1G041970/CsaV3_7G027820/CsaV3_3G009000/CsaV3_4G024760/CsaV3_1G004810/CsaV3_3G035040/CsaV3_3G022330/CsaV3_1G033580	9	CsaV3_6G016270/CsaV3_4G029360/CsaV3_2G013610/CsaV3_5G039300/CsaV3_3G039310/CsaV3_3G013000/CsaV3_2G015980/CsaV3_5G026390/CsaV3_7G023520
MF	GO:0017111	nucleoside-triphosphatase activity	153/5086	237/8671	0.0348661	0.402252	CsaV3_5G037960/CsaV3_3G037240/CsaV3_2G029570/CsaV3_1G043560/CsaV3_1G033760/CsaV3_2G015170/CsaV3_2G033270/CsaV3_4G000720/CsaV3_7G000280/CsaV3_5G040540/CsaV3_5G034810/CsaV3_3G004580/CsaV3_2G009630/CsaV3_3G023620/CsaV3_6G014210/CsaV3_4G005820/CsaV3_7G032840/CsaV3_6G038990/CsaV3_7G033280/CsaV3_1G024160/CsaV3_4G014740/CsaV3_3G035990/CsaV3_3G030270/CsaV3_7G027360/CsaV3_7G033300/CsaV3_7G029170/CsaV3_2G0…	CsaV3_5G037960/CsaV3_3G037240/CsaV3_2G029570/CsaV3_1G043560/CsaV3_1G033760/CsaV3_2G015170/CsaV3_2G033270/CsaV3_4G000720/CsaV3_7G000280/CsaV3_5G040540/CsaV3_5G034810/CsaV3_3G004580/CsaV3_2G009630/CsaV3_3G023620/CsaV3_6G014210/CsaV3_4G005820/CsaV3_7G032840/CsaV3_6G038990/CsaV3_7G033280/CsaV3_1G024160/CsaV3_4G014740/CsaV3_3G035990/CsaV3_3G030270/CsaV3_7G027360/CsaV3_7G033300/CsaV3_7G029170/CsaV3_2G0…	153	64	CsaV3_4G000720/CsaV3_5G040540/CsaV3_2G009630/CsaV3_3G023620/CsaV3_6G014210/CsaV3_6G038990/CsaV3_4G014740/CsaV3_7G027360/CsaV3_5G026260/CsaV3_2G007560/CsaV3_6G038660/CsaV3_7G000390/CsaV3_1G002210/CsaV3_3G043190/CsaV3_3G038310/CsaV3_3G021800/CsaV3_6G052230/novel.401/CsaV3_7G031590/CsaV3_3G010260/CsaV3_2G014330/CsaV3_5G034720/CsaV3_3G002090/CsaV3_4G008940/CsaV3_3G019320/CsaV3_1G002200/CsaV3_6G007240…	89	CsaV3_5G037960/CsaV3_3G037240/CsaV3_2G029570/CsaV3_1G043560/CsaV3_1G033760/CsaV3_2G015170/CsaV3_2G033270/CsaV3_7G000280/CsaV3_5G034810/CsaV3_3G004580/CsaV3_4G005820/CsaV3_7G032840/CsaV3_7G033280/CsaV3_1G024160/CsaV3_3G035990/CsaV3_3G030270/CsaV3_7G033300/CsaV3_7G029170/CsaV3_2G014220/CsaV3_4G034600/CsaV3_6G035790/CsaV3_1G005960/CsaV3_6G000140/CsaV3_1G031660/CsaV3_6G040670/CsaV3_6G044510/CsaV3_4G0…
MF	GO:0003777	microtubule motor activity	36/5086	50/8671	0.0356606	0.402252	CsaV3_1G033760/CsaV3_2G015170/CsaV3_7G000280/CsaV3_4G005820/CsaV3_7G033280/CsaV3_1G024160/CsaV3_2G014220/CsaV3_4G034600/CsaV3_7G000390/CsaV3_6G000140/CsaV3_4G001020/CsaV3_6G034290/CsaV3_5G002790/CsaV3_2G025940/CsaV3_3G004460/CsaV3_3G047980/CsaV3_7G021510/CsaV3_1G003530/CsaV3_3G037420/CsaV3_2G029620/CsaV3_3G015910/CsaV3_6G045040/CsaV3_2G005260/CsaV3_1G011320/CsaV3_1G006890/CsaV3_4G007670/CsaV3_4G0…	CsaV3_1G033760/CsaV3_2G015170/CsaV3_7G000280/CsaV3_4G005820/CsaV3_7G033280/CsaV3_1G024160/CsaV3_2G014220/CsaV3_4G034600/CsaV3_7G000390/CsaV3_6G000140/CsaV3_4G001020/CsaV3_6G034290/CsaV3_5G002790/CsaV3_2G025940/CsaV3_3G004460/CsaV3_3G047980/CsaV3_7G021510/CsaV3_1G003530/CsaV3_3G037420/CsaV3_2G029620/CsaV3_3G015910/CsaV3_6G045040/CsaV3_2G005260/CsaV3_1G011320/CsaV3_1G006890/CsaV3_4G007670/CsaV3_4G0…	36	2	CsaV3_7G000390/CsaV3_4G022100	34	CsaV3_1G033760/CsaV3_2G015170/CsaV3_7G000280/CsaV3_4G005820/CsaV3_7G033280/CsaV3_1G024160/CsaV3_2G014220/CsaV3_4G034600/CsaV3_6G000140/CsaV3_4G001020/CsaV3_6G034290/CsaV3_5G002790/CsaV3_2G025940/CsaV3_3G004460/CsaV3_3G047980/CsaV3_7G021510/CsaV3_1G003530/CsaV3_3G037420/CsaV3_2G029620/CsaV3_3G015910/CsaV3_6G045040/CsaV3_2G005260/CsaV3_1G011320/CsaV3_1G006890/CsaV3_4G007670/CsaV3_4G024680/CsaV3_1G0…
MF	GO:0016903	oxidoreductase activity, acting on the aldehyde or oxo group of donors	16/5086	20/8671	0.0394422	0.421455	CsaV3_3G020110/CsaV3_4G037480/CsaV3_2G014210/CsaV3_6G001210/CsaV3_6G013490/CsaV3_2G030530/CsaV3_5G014440/CsaV3_5G031990/CsaV3_6G034530/CsaV3_5G026370/CsaV3_6G041570/CsaV3_6G014940/CsaV3_5G007980/CsaV3_6G036340/CsaV3_1G009410/CsaV3_6G014930	CsaV3_3G020110/CsaV3_4G037480/CsaV3_2G014210/CsaV3_6G001210/CsaV3_6G013490/CsaV3_2G030530/CsaV3_5G014440/CsaV3_5G031990/CsaV3_6G034530/CsaV3_5G026370/CsaV3_6G041570/CsaV3_6G014940/CsaV3_5G007980/CsaV3_6G036340/CsaV3_1G009410/CsaV3_6G014930	16	4	CsaV3_6G034530/CsaV3_5G026370/CsaV3_6G041570/CsaV3_6G014930	12	CsaV3_3G020110/CsaV3_4G037480/CsaV3_2G014210/CsaV3_6G001210/CsaV3_6G013490/CsaV3_2G030530/CsaV3_5G014440/CsaV3_5G031990/CsaV3_6G014940/CsaV3_5G007980/CsaV3_6G036340/CsaV3_1G009410
MF	GO:0046982	protein heterodimerization activity	39/5086	55/8671	0.0413437	0.421455	CsaV3_1G012840/CsaV3_6G002190/CsaV3_7G031310/CsaV3_6G017110/CsaV3_1G014090/CsaV3_1G042610/CsaV3_6G003690/CsaV3_6G017030/CsaV3_7G028400/CsaV3_1G014110/CsaV3_6G017120/CsaV3_2G006590/CsaV3_6G040150/CsaV3_6G017050/CsaV3_7G006030/CsaV3_2G013770/CsaV3_1G000520/CsaV3_7G003000/CsaV3_1G033640/CsaV3_7G025320/CsaV3_3G035090/CsaV3_6G022220/CsaV3_1G014150/CsaV3_6G040610/CsaV3_6G017040/CsaV3_1G038920/CsaV3_7G0…	CsaV3_1G012840/CsaV3_6G002190/CsaV3_7G031310/CsaV3_6G017110/CsaV3_1G014090/CsaV3_1G042610/CsaV3_6G003690/CsaV3_6G017030/CsaV3_7G028400/CsaV3_1G014110/CsaV3_6G017120/CsaV3_2G006590/CsaV3_6G040150/CsaV3_6G017050/CsaV3_7G006030/CsaV3_2G013770/CsaV3_1G000520/CsaV3_7G003000/CsaV3_1G033640/CsaV3_7G025320/CsaV3_3G035090/CsaV3_6G022220/CsaV3_1G014150/CsaV3_6G040610/CsaV3_6G017040/CsaV3_1G038920/CsaV3_7G0…	39	10	CsaV3_7G006030/CsaV3_7G029840/CsaV3_1G039060/CsaV3_6G038390/CsaV3_5G029530/CsaV3_5G006310/CsaV3_6G021790/CsaV3_6G009670/CsaV3_3G035490/CsaV3_7G028980	29	CsaV3_1G012840/CsaV3_6G002190/CsaV3_7G031310/CsaV3_6G017110/CsaV3_1G014090/CsaV3_1G042610/CsaV3_6G003690/CsaV3_6G017030/CsaV3_7G028400/CsaV3_1G014110/CsaV3_6G017120/CsaV3_2G006590/CsaV3_6G040150/CsaV3_6G017050/CsaV3_2G013770/CsaV3_1G000520/CsaV3_7G003000/CsaV3_1G033640/CsaV3_7G025320/CsaV3_3G035090/CsaV3_6G022220/CsaV3_1G014150/CsaV3_6G040610/CsaV3_6G017040/CsaV3_1G038920/CsaV3_7G034500/CsaV3_7G0…
MF	GO:0016879	ligase activity, forming carbon-nitrogen bonds	20/5086	26/8671	0.0418466	0.421455	CsaV3_3G013840/CsaV3_3G021030/CsaV3_5G023920/CsaV3_7G030560/CsaV3_1G000670/CsaV3_5G002770/CsaV3_6G016090/CsaV3_6G040130/CsaV3_1G042270/CsaV3_3G033280/CsaV3_7G023220/CsaV3_7G029810/CsaV3_3G013600/CsaV3_6G045440/CsaV3_2G012390/CsaV3_3G006560/CsaV3_4G031360/CsaV3_1G009540/CsaV3_6G036910/CsaV3_1G009560	CsaV3_3G013840/CsaV3_3G021030/CsaV3_5G023920/CsaV3_7G030560/CsaV3_1G000670/CsaV3_5G002770/CsaV3_6G016090/CsaV3_6G040130/CsaV3_1G042270/CsaV3_3G033280/CsaV3_7G023220/CsaV3_7G029810/CsaV3_3G013600/CsaV3_6G045440/CsaV3_2G012390/CsaV3_3G006560/CsaV3_4G031360/CsaV3_1G009540/CsaV3_6G036910/CsaV3_1G009560	20	6	CsaV3_3G021030/CsaV3_5G023920/CsaV3_7G030560/CsaV3_1G000670/CsaV3_3G033280/CsaV3_6G036910	14	CsaV3_3G013840/CsaV3_5G002770/CsaV3_6G016090/CsaV3_6G040130/CsaV3_1G042270/CsaV3_7G023220/CsaV3_7G029810/CsaV3_3G013600/CsaV3_6G045440/CsaV3_2G012390/CsaV3_3G006560/CsaV3_4G031360/CsaV3_1G009540/CsaV3_1G009560
MF	GO:0003682	chromatin binding	1163969	13/8671	0.0474631	0.461538	CsaV3_3G001160/CsaV3_1G042250/CsaV3_5G013990/CsaV3_3G042090/CsaV3_3G046180/CsaV3_7G003320/CsaV3_1G046090/CsaV3_6G017380/CsaV3_7G000170/CsaV3_3G048480/CsaV3_3G019600	CsaV3_3G001160/CsaV3_1G042250/CsaV3_5G013990/CsaV3_3G042090/CsaV3_3G046180/CsaV3_7G003320/CsaV3_1G046090/CsaV3_6G017380/CsaV3_7G000170/CsaV3_3G048480/CsaV3_3G019600	11	3	CsaV3_3G042090/CsaV3_7G000170/CsaV3_3G019600	8	CsaV3_3G001160/CsaV3_1G042250/CsaV3_5G013990/CsaV3_3G046180/CsaV3_7G003320/CsaV3_1G046090/CsaV3_6G017380/CsaV3_3G048480

## Sheet: XS_30vsXS_20DAP GO
Category	GOID	Description	GeneRatio	BgRatio	pvalue	padj	geneID	geneName	Count	Up	Up_Gene_id	Down	Down_Gene_id
BP	GO:0008610	lipid biosynthetic process	60/2879	91/5818	0.00104144	0.314854	CsaV3_4G028790/CsaV3_3G006930/CsaV3_3G010290/CsaV3_1G031130/CsaV3_3G017450/CsaV3_3G010300/CsaV3_1G029290/CsaV3_2G028690/CsaV3_5G027330/CsaV3_6G005620/CsaV3_7G010240/CsaV3_4G000740/CsaV3_2G032580/CsaV3_6G051980/CsaV3_5G028680/CsaV3_1G012820/CsaV3_1G030920/CsaV3_4G037630/CsaV3_6G015560/CsaV3_5G033710/CsaV3_2G010670/CsaV3_3G016490/CsaV3_1G042370/CsaV3_4G007960/CsaV3_1G042220/CsaV3_5G034300/CsaV3_4G0…	CsaV3_4G028790/CsaV3_3G006930/CsaV3_3G010290/CsaV3_1G031130/CsaV3_3G017450/CsaV3_3G010300/CsaV3_1G029290/CsaV3_2G028690/CsaV3_5G027330/CsaV3_6G005620/CsaV3_7G010240/CsaV3_4G000740/CsaV3_2G032580/CsaV3_6G051980/CsaV3_5G028680/CsaV3_1G012820/CsaV3_1G030920/CsaV3_4G037630/CsaV3_6G015560/CsaV3_5G033710/CsaV3_2G010670/CsaV3_3G016490/CsaV3_1G042370/CsaV3_4G007960/CsaV3_1G042220/CsaV3_5G034300/CsaV3_4G0…	60	33	CsaV3_4G028790/CsaV3_3G006930/CsaV3_3G010290/CsaV3_3G017450/CsaV3_2G028690/CsaV3_6G005620/CsaV3_7G010240/CsaV3_4G000740/CsaV3_5G028680/CsaV3_1G012820/CsaV3_4G037630/CsaV3_5G033710/CsaV3_2G010670/CsaV3_1G042220/CsaV3_4G022060/CsaV3_2G031800/CsaV3_5G002520/CsaV3_2G014440/CsaV3_6G039300/CsaV3_3G008190/CsaV3_5G024400/CsaV3_4G022080/CsaV3_3G007660/CsaV3_1G033210/CsaV3_1G033910/CsaV3_3G001560/CsaV3_5G0…	27	CsaV3_1G031130/CsaV3_3G010300/CsaV3_1G029290/CsaV3_5G027330/CsaV3_2G032580/CsaV3_6G051980/CsaV3_1G030920/CsaV3_6G015560/CsaV3_3G016490/CsaV3_1G042370/CsaV3_4G007960/CsaV3_5G034300/CsaV3_3G032020/CsaV3_2G003280/CsaV3_5G006440/CsaV3_5G004310/CsaV3_6G006560/CsaV3_5G034740/CsaV3_3G042490/CsaV3_3G043140/CsaV3_3G032010/CsaV3_7G023860/CsaV3_2G001370/CsaV3_7G006180/CsaV3_2G036590/CsaV3_5G015780/CsaV3_7G0…
BP	GO:0016053	organic acid biosynthetic process	74/2879	118/5818	0.00238811	0.314854	CsaV3_4G028790/CsaV3_6G045310/CsaV3_3G010290/CsaV3_1G031130/CsaV3_3G017450/CsaV3_7G021470/CsaV3_3G010300/CsaV3_7G006730/CsaV3_1G042270/CsaV3_2G028690/CsaV3_4G000560/CsaV3_5G026050/CsaV3_3G043020/CsaV3_2G015280/CsaV3_1G030920/CsaV3_1G031480/CsaV3_3G035920/CsaV3_5G025000/CsaV3_1G046070/CsaV3_6G040340/CsaV3_1G038260/CsaV3_2G003300/CsaV3_3G021030/CsaV3_6G036360/CsaV3_7G030560/CsaV3_2G010670/CsaV3_3G0…	CsaV3_4G028790/CsaV3_6G045310/CsaV3_3G010290/CsaV3_1G031130/CsaV3_3G017450/CsaV3_7G021470/CsaV3_3G010300/CsaV3_7G006730/CsaV3_1G042270/CsaV3_2G028690/CsaV3_4G000560/CsaV3_5G026050/CsaV3_3G043020/CsaV3_2G015280/CsaV3_1G030920/CsaV3_1G031480/CsaV3_3G035920/CsaV3_5G025000/CsaV3_1G046070/CsaV3_6G040340/CsaV3_1G038260/CsaV3_2G003300/CsaV3_3G021030/CsaV3_6G036360/CsaV3_7G030560/CsaV3_2G010670/CsaV3_3G0…	74	47	CsaV3_4G028790/CsaV3_3G010290/CsaV3_3G017450/CsaV3_7G006730/CsaV3_1G042270/CsaV3_2G028690/CsaV3_4G000560/CsaV3_5G026050/CsaV3_2G015280/CsaV3_1G031480/CsaV3_3G035920/CsaV3_1G046070/CsaV3_6G040340/CsaV3_1G038260/CsaV3_3G021030/CsaV3_7G030560/CsaV3_2G010670/CsaV3_3G021690/CsaV3_6G048980/CsaV3_6G040130/CsaV3_1G039980/CsaV3_6G048680/CsaV3_6G013500/CsaV3_5G002520/CsaV3_2G034880/CsaV3_5G040040/CsaV3_3G0…	27	CsaV3_6G045310/CsaV3_1G031130/CsaV3_7G021470/CsaV3_3G010300/CsaV3_3G043020/CsaV3_1G030920/CsaV3_5G025000/CsaV3_2G003300/CsaV3_6G036360/CsaV3_3G016490/CsaV3_7G005980/CsaV3_2G030420/CsaV3_5G034300/CsaV3_2G014210/CsaV3_7G018620/CsaV3_7G021780/CsaV3_5G033360/CsaV3_6G006560/CsaV3_4G013530/CsaV3_6G036910/CsaV3_6G021500/CsaV3_4G037690/CsaV3_5G014440/CsaV3_3G043140/CsaV3_3G009100/CsaV3_5G029840/CsaV3_6G0…
BP	GO:0046394	carboxylic acid biosynthetic process	74/2879	118/5818	0.00238811	0.314854	CsaV3_4G028790/CsaV3_6G045310/CsaV3_3G010290/CsaV3_1G031130/CsaV3_3G017450/CsaV3_7G021470/CsaV3_3G010300/CsaV3_7G006730/CsaV3_1G042270/CsaV3_2G028690/CsaV3_4G000560/CsaV3_5G026050/CsaV3_3G043020/CsaV3_2G015280/CsaV3_1G030920/CsaV3_1G031480/CsaV3_3G035920/CsaV3_5G025000/CsaV3_1G046070/CsaV3_6G040340/CsaV3_1G038260/CsaV3_2G003300/CsaV3_3G021030/CsaV3_6G036360/CsaV3_7G030560/CsaV3_2G010670/CsaV3_3G0…	CsaV3_4G028790/CsaV3_6G045310/CsaV3_3G010290/CsaV3_1G031130/CsaV3_3G017450/CsaV3_7G021470/CsaV3_3G010300/CsaV3_7G006730/CsaV3_1G042270/CsaV3_2G028690/CsaV3_4G000560/CsaV3_5G026050/CsaV3_3G043020/CsaV3_2G015280/CsaV3_1G030920/CsaV3_1G031480/CsaV3_3G035920/CsaV3_5G025000/CsaV3_1G046070/CsaV3_6G040340/CsaV3_1G038260/CsaV3_2G003300/CsaV3_3G021030/CsaV3_6G036360/CsaV3_7G030560/CsaV3_2G010670/CsaV3_3G0…	74	47	CsaV3_4G028790/CsaV3_3G010290/CsaV3_3G017450/CsaV3_7G006730/CsaV3_1G042270/CsaV3_2G028690/CsaV3_4G000560/CsaV3_5G026050/CsaV3_2G015280/CsaV3_1G031480/CsaV3_3G035920/CsaV3_1G046070/CsaV3_6G040340/CsaV3_1G038260/CsaV3_3G021030/CsaV3_7G030560/CsaV3_2G010670/CsaV3_3G021690/CsaV3_6G048980/CsaV3_6G040130/CsaV3_1G039980/CsaV3_6G048680/CsaV3_6G013500/CsaV3_5G002520/CsaV3_2G034880/CsaV3_5G040040/CsaV3_3G0…	27	CsaV3_6G045310/CsaV3_1G031130/CsaV3_7G021470/CsaV3_3G010300/CsaV3_3G043020/CsaV3_1G030920/CsaV3_5G025000/CsaV3_2G003300/CsaV3_6G036360/CsaV3_3G016490/CsaV3_7G005980/CsaV3_2G030420/CsaV3_5G034300/CsaV3_2G014210/CsaV3_7G018620/CsaV3_7G021780/CsaV3_5G033360/CsaV3_6G006560/CsaV3_4G013530/CsaV3_6G036910/CsaV3_6G021500/CsaV3_4G037690/CsaV3_5G014440/CsaV3_3G043140/CsaV3_3G009100/CsaV3_5G029840/CsaV3_6G0…
BP	GO:0044255	cellular lipid metabolic process	77/2879	125/5818	0.00394237	0.314854	CsaV3_4G028790/CsaV3_3G006930/CsaV3_6G037410/CsaV3_3G010290/CsaV3_1G031130/CsaV3_3G017450/CsaV3_3G010300/CsaV3_2G028690/CsaV3_6G005620/CsaV3_7G010240/CsaV3_4G000740/CsaV3_2G032580/CsaV3_6G051980/CsaV3_7G033960/CsaV3_5G028680/CsaV3_1G012820/CsaV3_1G030920/CsaV3_5G013590/CsaV3_3G010870/CsaV3_6G015560/CsaV3_7G021690/CsaV3_1G017150/CsaV3_5G033710/CsaV3_2G011410/CsaV3_2G010670/CsaV3_3G016490/CsaV3_1G0…	CsaV3_4G028790/CsaV3_3G006930/CsaV3_6G037410/CsaV3_3G010290/CsaV3_1G031130/CsaV3_3G017450/CsaV3_3G010300/CsaV3_2G028690/CsaV3_6G005620/CsaV3_7G010240/CsaV3_4G000740/CsaV3_2G032580/CsaV3_6G051980/CsaV3_7G033960/CsaV3_5G028680/CsaV3_1G012820/CsaV3_1G030920/CsaV3_5G013590/CsaV3_3G010870/CsaV3_6G015560/CsaV3_7G021690/CsaV3_1G017150/CsaV3_5G033710/CsaV3_2G011410/CsaV3_2G010670/CsaV3_3G016490/CsaV3_1G0…	77	44	CsaV3_4G028790/CsaV3_3G006930/CsaV3_6G037410/CsaV3_3G010290/CsaV3_3G017450/CsaV3_2G028690/CsaV3_6G005620/CsaV3_7G010240/CsaV3_4G000740/CsaV3_7G033960/CsaV3_5G028680/CsaV3_1G012820/CsaV3_3G010870/CsaV3_1G017150/CsaV3_5G033710/CsaV3_2G010670/CsaV3_4G028490/CsaV3_1G042220/CsaV3_4G022060/CsaV3_2G031800/CsaV3_5G002520/CsaV3_2G014440/CsaV3_1G044800/CsaV3_2G015040/CsaV3_UNG137080/CsaV3_5G024400/CsaV3_4G…	33	CsaV3_1G031130/CsaV3_3G010300/CsaV3_2G032580/CsaV3_6G051980/CsaV3_1G030920/CsaV3_5G013590/CsaV3_6G015560/CsaV3_7G021690/CsaV3_2G011410/CsaV3_3G016490/CsaV3_1G042370/CsaV3_4G007960/CsaV3_1G044910/CsaV3_5G036790/CsaV3_3G046520/CsaV3_5G034300/CsaV3_2G003280/CsaV3_5G006440/CsaV3_6G048550/CsaV3_5G004310/CsaV3_6G006560/CsaV3_5G034740/CsaV3_6G049640/CsaV3_3G043140/CsaV3_3G036240/CsaV3_7G023860/CsaV3_2G0…
BP	GO:0006650	glycerophospholipid metabolic process	23/2879	31/5818	0.00443663	0.314854	CsaV3_6G037410/CsaV3_7G033960/CsaV3_5G028680/CsaV3_5G013590/CsaV3_7G021690/CsaV3_1G017150/CsaV3_1G042370/CsaV3_1G044910/CsaV3_4G028490/CsaV3_1G042220/CsaV3_5G036790/CsaV3_3G046520/CsaV3_4G022060/CsaV3_2G015040/CsaV3_1G033210/CsaV3_5G034740/CsaV3_6G048460/CsaV3_3G001560/CsaV3_6G049640/CsaV3_3G036240/CsaV3_3G044460/CsaV3_7G001350/CsaV3_5G023290	CsaV3_6G037410/CsaV3_7G033960/CsaV3_5G028680/CsaV3_5G013590/CsaV3_7G021690/CsaV3_1G017150/CsaV3_1G042370/CsaV3_1G044910/CsaV3_4G028490/CsaV3_1G042220/CsaV3_5G036790/CsaV3_3G046520/CsaV3_4G022060/CsaV3_2G015040/CsaV3_1G033210/CsaV3_5G034740/CsaV3_6G048460/CsaV3_3G001560/CsaV3_6G049640/CsaV3_3G036240/CsaV3_3G044460/CsaV3_7G001350/CsaV3_5G023290	23	12	CsaV3_6G037410/CsaV3_7G033960/CsaV3_5G028680/CsaV3_1G017150/CsaV3_4G028490/CsaV3_1G042220/CsaV3_4G022060/CsaV3_2G015040/CsaV3_1G033210/CsaV3_6G048460/CsaV3_3G001560/CsaV3_3G044460	11	CsaV3_5G013590/CsaV3_7G021690/CsaV3_1G042370/CsaV3_1G044910/CsaV3_5G036790/CsaV3_3G046520/CsaV3_5G034740/CsaV3_6G049640/CsaV3_3G036240/CsaV3_7G001350/CsaV3_5G023290
BP	GO:0006644	phospholipid metabolic process	32/2879	46/5818	0.00450865	0.314854	CsaV3_6G037410/CsaV3_7G010240/CsaV3_7G033960/CsaV3_5G028680/CsaV3_5G013590/CsaV3_6G015560/CsaV3_7G021690/CsaV3_1G017150/CsaV3_5G033710/CsaV3_1G042370/CsaV3_1G044910/CsaV3_4G028490/CsaV3_1G042220/CsaV3_5G036790/CsaV3_3G046520/CsaV3_4G022060/CsaV3_2G014440/CsaV3_2G015040/CsaV3_5G024400/CsaV3_5G006440/CsaV3_5G004310/CsaV3_1G033210/CsaV3_5G034740/CsaV3_6G048460/CsaV3_3G001560/CsaV3_6G049640/CsaV3_3G0…	CsaV3_6G037410/CsaV3_7G010240/CsaV3_7G033960/CsaV3_5G028680/CsaV3_5G013590/CsaV3_6G015560/CsaV3_7G021690/CsaV3_1G017150/CsaV3_5G033710/CsaV3_1G042370/CsaV3_1G044910/CsaV3_4G028490/CsaV3_1G042220/CsaV3_5G036790/CsaV3_3G046520/CsaV3_4G022060/CsaV3_2G014440/CsaV3_2G015040/CsaV3_5G024400/CsaV3_5G006440/CsaV3_5G004310/CsaV3_1G033210/CsaV3_5G034740/CsaV3_6G048460/CsaV3_3G001560/CsaV3_6G049640/CsaV3_3G0…	32	16	CsaV3_6G037410/CsaV3_7G010240/CsaV3_7G033960/CsaV3_5G028680/CsaV3_1G017150/CsaV3_5G033710/CsaV3_4G028490/CsaV3_1G042220/CsaV3_4G022060/CsaV3_2G014440/CsaV3_2G015040/CsaV3_5G024400/CsaV3_1G033210/CsaV3_6G048460/CsaV3_3G001560/CsaV3_3G044460	16	CsaV3_5G013590/CsaV3_6G015560/CsaV3_7G021690/CsaV3_1G042370/CsaV3_1G044910/CsaV3_5G036790/CsaV3_3G046520/CsaV3_5G006440/CsaV3_5G004310/CsaV3_5G034740/CsaV3_6G049640/CsaV3_3G036240/CsaV3_7G006180/CsaV3_5G015780/CsaV3_7G001350/CsaV3_5G023290
BP	GO:0006413	translational initiation	14/2879	17/5818	0.00559435	0.316974	CsaV3_2G015740/CsaV3_7G021830/CsaV3_1G023010/CsaV3_3G005110/CsaV3_3G019240/CsaV3_2G007620/CsaV3_7G003720/CsaV3_1G032830/CsaV3_2G016200/CsaV3_5G010740/CsaV3_1G014460/CsaV3_3G043200/CsaV3_7G003030/CsaV3_2G012490	CsaV3_2G015740/CsaV3_7G021830/CsaV3_1G023010/CsaV3_3G005110/CsaV3_3G019240/CsaV3_2G007620/CsaV3_7G003720/CsaV3_1G032830/CsaV3_2G016200/CsaV3_5G010740/CsaV3_1G014460/CsaV3_3G043200/CsaV3_7G003030/CsaV3_2G012490	14	6	CsaV3_2G015740/CsaV3_1G023010/CsaV3_2G007620/CsaV3_3G043200/CsaV3_7G003030/CsaV3_2G012490	8	CsaV3_7G021830/CsaV3_3G005110/CsaV3_3G019240/CsaV3_7G003720/CsaV3_1G032830/CsaV3_2G016200/CsaV3_5G010740/CsaV3_1G014460
BP	GO:0006082	organic acid metabolic process	130/2879	226/5818	0.00819338	0.316974	CsaV3_4G028790/CsaV3_4G008430/CsaV3_6G045310/CsaV3_3G010290/CsaV3_1G031130/CsaV3_3G017450/CsaV3_7G021470/CsaV3_3G010300/CsaV3_7G006730/CsaV3_4G003400/CsaV3_1G042270/CsaV3_2G028690/CsaV3_7G010240/CsaV3_4G000560/CsaV3_6G008140/CsaV3_5G028880/CsaV3_5G026050/CsaV3_3G043020/CsaV3_1G042050/CsaV3_2G015280/CsaV3_2G033820/CsaV3_7G008280/CsaV3_1G030920/CsaV3_2G011840/CsaV3_2G016280/CsaV3_3G011860/CsaV3_1G0…	CsaV3_4G028790/CsaV3_4G008430/CsaV3_6G045310/CsaV3_3G010290/CsaV3_1G031130/CsaV3_3G017450/CsaV3_7G021470/CsaV3_3G010300/CsaV3_7G006730/CsaV3_4G003400/CsaV3_1G042270/CsaV3_2G028690/CsaV3_7G010240/CsaV3_4G000560/CsaV3_6G008140/CsaV3_5G028880/CsaV3_5G026050/CsaV3_3G043020/CsaV3_1G042050/CsaV3_2G015280/CsaV3_2G033820/CsaV3_7G008280/CsaV3_1G030920/CsaV3_2G011840/CsaV3_2G016280/CsaV3_3G011860/CsaV3_1G0…	130	78	CsaV3_4G028790/CsaV3_4G008430/CsaV3_3G010290/CsaV3_3G017450/CsaV3_7G006730/CsaV3_1G042270/CsaV3_2G028690/CsaV3_7G010240/CsaV3_4G000560/CsaV3_6G008140/CsaV3_5G028880/CsaV3_5G026050/CsaV3_1G042050/CsaV3_2G015280/CsaV3_7G008280/CsaV3_2G016280/CsaV3_3G011860/CsaV3_1G031480/CsaV3_3G035920/CsaV3_1G046070/CsaV3_6G040340/CsaV3_1G038260/CsaV3_3G021030/CsaV3_7G030560/CsaV3_2G010670/CsaV3_3G021690/CsaV3_5G0…	52	CsaV3_6G045310/CsaV3_1G031130/CsaV3_7G021470/CsaV3_3G010300/CsaV3_4G003400/CsaV3_3G043020/CsaV3_2G033820/CsaV3_1G030920/CsaV3_2G011840/CsaV3_5G025000/CsaV3_5G005900/CsaV3_3G044050/CsaV3_1G003150/CsaV3_2G003300/CsaV3_5G013970/CsaV3_5G023370/CsaV3_6G036360/CsaV3_3G016490/CsaV3_7G005980/CsaV3_2G030420/CsaV3_4G004380/CsaV3_3G004920/CsaV3_3G046850/CsaV3_5G034300/CsaV3_5G015730/CsaV3_2G026780/CsaV3_2G0…
BP	GO:0043436	oxoacid metabolic process	129/2879	225/5818	0.0097371	0.316974	CsaV3_4G028790/CsaV3_4G008430/CsaV3_6G045310/CsaV3_3G010290/CsaV3_1G031130/CsaV3_3G017450/CsaV3_7G021470/CsaV3_3G010300/CsaV3_7G006730/CsaV3_4G003400/CsaV3_1G042270/CsaV3_2G028690/CsaV3_7G010240/CsaV3_4G000560/CsaV3_6G008140/CsaV3_5G028880/CsaV3_5G026050/CsaV3_3G043020/CsaV3_1G042050/CsaV3_2G015280/CsaV3_2G033820/CsaV3_7G008280/CsaV3_1G030920/CsaV3_2G011840/CsaV3_2G016280/CsaV3_1G031480/CsaV3_3G0…	CsaV3_4G028790/CsaV3_4G008430/CsaV3_6G045310/CsaV3_3G010290/CsaV3_1G031130/CsaV3_3G017450/CsaV3_7G021470/CsaV3_3G010300/CsaV3_7G006730/CsaV3_4G003400/CsaV3_1G042270/CsaV3_2G028690/CsaV3_7G010240/CsaV3_4G000560/CsaV3_6G008140/CsaV3_5G028880/CsaV3_5G026050/CsaV3_3G043020/CsaV3_1G042050/CsaV3_2G015280/CsaV3_2G033820/CsaV3_7G008280/CsaV3_1G030920/CsaV3_2G011840/CsaV3_2G016280/CsaV3_1G031480/CsaV3_3G0…	129	77	CsaV3_4G028790/CsaV3_4G008430/CsaV3_3G010290/CsaV3_3G017450/CsaV3_7G006730/CsaV3_1G042270/CsaV3_2G028690/CsaV3_7G010240/CsaV3_4G000560/CsaV3_6G008140/CsaV3_5G028880/CsaV3_5G026050/CsaV3_1G042050/CsaV3_2G015280/CsaV3_7G008280/CsaV3_2G016280/CsaV3_1G031480/CsaV3_3G035920/CsaV3_1G046070/CsaV3_6G040340/CsaV3_1G038260/CsaV3_3G021030/CsaV3_7G030560/CsaV3_2G010670/CsaV3_3G021690/CsaV3_5G038370/CsaV3_1G0…	52	CsaV3_6G045310/CsaV3_1G031130/CsaV3_7G021470/CsaV3_3G010300/CsaV3_4G003400/CsaV3_3G043020/CsaV3_2G033820/CsaV3_1G030920/CsaV3_2G011840/CsaV3_5G025000/CsaV3_5G005900/CsaV3_3G044050/CsaV3_1G003150/CsaV3_2G003300/CsaV3_5G013970/CsaV3_5G023370/CsaV3_6G036360/CsaV3_3G016490/CsaV3_7G005980/CsaV3_2G030420/CsaV3_4G004380/CsaV3_3G004920/CsaV3_3G046850/CsaV3_5G034300/CsaV3_5G015730/CsaV3_2G026780/CsaV3_2G0…
BP	GO:0006325	chromatin organization	21/2879	29/5818	0.010276	0.316974	CsaV3_6G046960/CsaV3_6G036780/CsaV3_3G002320/CsaV3_6G007420/CsaV3_3G020800/CsaV3_3G027790/CsaV3_7G035280/CsaV3_5G028310/CsaV3_6G044170/CsaV3_4G000180/CsaV3_4G031740/CsaV3_6G017380/CsaV3_3G015610/CsaV3_5G037970/CsaV3_2G001410/CsaV3_1G005900/CsaV3_6G042640/CsaV3_3G011580/CsaV3_3G043700/novel.310/CsaV3_1G005360	CsaV3_6G046960/CsaV3_6G036780/CsaV3_3G002320/CsaV3_6G007420/CsaV3_3G020800/CsaV3_3G027790/CsaV3_7G035280/CsaV3_5G028310/CsaV3_6G044170/CsaV3_4G000180/CsaV3_4G031740/CsaV3_6G017380/CsaV3_3G015610/CsaV3_5G037970/CsaV3_2G001410/CsaV3_1G005900/CsaV3_6G042640/CsaV3_3G011580/CsaV3_3G043700/-/CsaV3_1G005360	21	11	CsaV3_6G046960/CsaV3_6G036780/CsaV3_3G020800/CsaV3_3G027790/CsaV3_5G028310/CsaV3_6G044170/CsaV3_6G017380/CsaV3_2G001410/CsaV3_1G005900/CsaV3_3G011580/CsaV3_3G043700	10	CsaV3_3G002320/CsaV3_6G007420/CsaV3_7G035280/CsaV3_4G000180/CsaV3_4G031740/CsaV3_3G015610/CsaV3_5G037970/CsaV3_6G042640/novel.310/CsaV3_1G005360
BP	GO:0046488	phosphatidylinositol metabolic process	21/2879	29/5818	0.010276	0.316974	CsaV3_6G037410/CsaV3_7G033960/CsaV3_5G013590/CsaV3_7G021690/CsaV3_1G017150/CsaV3_1G042370/CsaV3_1G044910/CsaV3_4G028490/CsaV3_1G042220/CsaV3_5G036790/CsaV3_3G046520/CsaV3_4G022060/CsaV3_2G015040/CsaV3_1G033210/CsaV3_6G048460/CsaV3_3G001560/CsaV3_6G049640/CsaV3_3G036240/CsaV3_3G044460/CsaV3_7G001350/CsaV3_5G023290	CsaV3_6G037410/CsaV3_7G033960/CsaV3_5G013590/CsaV3_7G021690/CsaV3_1G017150/CsaV3_1G042370/CsaV3_1G044910/CsaV3_4G028490/CsaV3_1G042220/CsaV3_5G036790/CsaV3_3G046520/CsaV3_4G022060/CsaV3_2G015040/CsaV3_1G033210/CsaV3_6G048460/CsaV3_3G001560/CsaV3_6G049640/CsaV3_3G036240/CsaV3_3G044460/CsaV3_7G001350/CsaV3_5G023290	21	11	CsaV3_6G037410/CsaV3_7G033960/CsaV3_1G017150/CsaV3_4G028490/CsaV3_1G042220/CsaV3_4G022060/CsaV3_2G015040/CsaV3_1G033210/CsaV3_6G048460/CsaV3_3G001560/CsaV3_3G044460	10	CsaV3_5G013590/CsaV3_7G021690/CsaV3_1G042370/CsaV3_1G044910/CsaV3_5G036790/CsaV3_3G046520/CsaV3_6G049640/CsaV3_3G036240/CsaV3_7G001350/CsaV3_5G023290
BP	GO:0009108	coenzyme biosynthetic process	36/2879	55/5818	0.012016	0.316974	CsaV3_7G029140/CsaV3_7G021470/CsaV3_1G042270/CsaV3_4G000560/CsaV3_6G039940/CsaV3_6G033760/CsaV3_2G015280/CsaV3_7G030460/CsaV3_3G035920/CsaV3_1G046070/CsaV3_1G008930/CsaV3_6G040340/CsaV3_1G008520/CsaV3_7G030490/CsaV3_3G033790/CsaV3_2G030420/CsaV3_1G042920/CsaV3_1G039980/CsaV3_4G000530/CsaV3_6G048680/CsaV3_6G013500/CsaV3_3G036910/CsaV3_5G029170/CsaV3_6G040390/CsaV3_6G034080/CsaV3_6G048080/CsaV3_4G0…	CsaV3_7G029140/CsaV3_7G021470/CsaV3_1G042270/CsaV3_4G000560/CsaV3_6G039940/CsaV3_6G033760/CsaV3_2G015280/CsaV3_7G030460/CsaV3_3G035920/CsaV3_1G046070/CsaV3_1G008930/CsaV3_6G040340/CsaV3_1G008520/CsaV3_7G030490/CsaV3_3G033790/CsaV3_2G030420/CsaV3_1G042920/CsaV3_1G039980/CsaV3_4G000530/CsaV3_6G048680/CsaV3_6G013500/CsaV3_3G036910/CsaV3_5G029170/CsaV3_6G040390/CsaV3_6G034080/CsaV3_6G048080/CsaV3_4G0…	36	24	CsaV3_1G042270/CsaV3_4G000560/CsaV3_6G033760/CsaV3_2G015280/CsaV3_7G030460/CsaV3_3G035920/CsaV3_1G046070/CsaV3_1G008930/CsaV3_6G040340/CsaV3_1G008520/CsaV3_7G030490/CsaV3_1G042920/CsaV3_1G039980/CsaV3_4G000530/CsaV3_6G048680/CsaV3_6G013500/CsaV3_3G036910/CsaV3_5G029170/CsaV3_6G040390/CsaV3_6G048080/CsaV3_4G004200/CsaV3_4G008960/CsaV3_2G013320/CsaV3_5G008630	12	CsaV3_7G029140/CsaV3_7G021470/CsaV3_6G039940/CsaV3_3G033790/CsaV3_2G030420/CsaV3_6G034080/CsaV3_4G013530/CsaV3_6G036910/CsaV3_4G037690/CsaV3_3G009100/CsaV3_6G038720/CsaV3_6G040430
BP	GO:0006629	lipid metabolic process	132/2879	232/5818	0.0125571	0.316974	CsaV3_4G028790/CsaV3_2G015840/CsaV3_3G006930/CsaV3_7G026640/CsaV3_6G037410/CsaV3_7G027580/CsaV3_3G010290/CsaV3_1G031130/CsaV3_7G027570/CsaV3_3G017450/CsaV3_3G010300/CsaV3_3G028180/CsaV3_1G029290/CsaV3_4G002900/CsaV3_2G028690/CsaV3_5G027330/CsaV3_6G005620/CsaV3_3G030770/CsaV3_7G010240/CsaV3_4G000740/CsaV3_2G032580/CsaV3_3G014240/CsaV3_6G051980/CsaV3_7G033960/CsaV3_5G028680/CsaV3_1G012820/CsaV3_1G0…	CsaV3_4G028790/CsaV3_2G015840/CsaV3_3G006930/CsaV3_7G026640/CsaV3_6G037410/CsaV3_7G027580/CsaV3_3G010290/CsaV3_1G031130/CsaV3_7G027570/CsaV3_3G017450/CsaV3_3G010300/CsaV3_3G028180/CsaV3_1G029290/CsaV3_4G002900/CsaV3_2G028690/CsaV3_5G027330/CsaV3_6G005620/CsaV3_3G030770/CsaV3_7G010240/CsaV3_4G000740/CsaV3_2G032580/CsaV3_3G014240/CsaV3_6G051980/CsaV3_7G033960/CsaV3_5G028680/CsaV3_1G012820/CsaV3_1G0…	132	74	CsaV3_4G028790/CsaV3_2G015840/CsaV3_3G006930/CsaV3_6G037410/CsaV3_7G027580/CsaV3_3G010290/CsaV3_7G027570/CsaV3_3G017450/CsaV3_3G028180/CsaV3_4G002900/CsaV3_2G028690/CsaV3_6G005620/CsaV3_7G010240/CsaV3_4G000740/CsaV3_3G014240/CsaV3_7G033960/CsaV3_5G028680/CsaV3_1G012820/CsaV3_1G036200/CsaV3_4G037630/CsaV3_3G010870/CsaV3_5G026640/CsaV3_1G017150/CsaV3_5G033710/CsaV3_2G010670/CsaV3_1G046370/CsaV3_7G0…	58	CsaV3_7G026640/CsaV3_1G031130/CsaV3_3G010300/CsaV3_1G029290/CsaV3_5G027330/CsaV3_3G030770/CsaV3_2G032580/CsaV3_6G051980/CsaV3_1G030920/CsaV3_6G001840/CsaV3_6G000930/CsaV3_5G013590/CsaV3_6G015560/CsaV3_7G021690/CsaV3_4G001650/CsaV3_6G050780/CsaV3_2G010330/CsaV3_2G011410/CsaV3_3G016490/CsaV3_5G035100/CsaV3_1G042370/CsaV3_4G007960/CsaV3_1G044910/CsaV3_6G000490/CsaV3_5G036790/CsaV3_3G046520/CsaV3_5G0…
BP	GO:0019752	carboxylic acid metabolic process	125/2879	219/5818	0.0130607	0.316974	CsaV3_4G028790/CsaV3_4G008430/CsaV3_6G045310/CsaV3_3G010290/CsaV3_1G031130/CsaV3_3G017450/CsaV3_7G021470/CsaV3_3G010300/CsaV3_7G006730/CsaV3_4G003400/CsaV3_1G042270/CsaV3_2G028690/CsaV3_7G010240/CsaV3_4G000560/CsaV3_6G008140/CsaV3_5G028880/CsaV3_5G026050/CsaV3_3G043020/CsaV3_1G042050/CsaV3_2G015280/CsaV3_2G033820/CsaV3_7G008280/CsaV3_1G030920/CsaV3_2G011840/CsaV3_2G016280/CsaV3_1G031480/CsaV3_3G0…	CsaV3_4G028790/CsaV3_4G008430/CsaV3_6G045310/CsaV3_3G010290/CsaV3_1G031130/CsaV3_3G017450/CsaV3_7G021470/CsaV3_3G010300/CsaV3_7G006730/CsaV3_4G003400/CsaV3_1G042270/CsaV3_2G028690/CsaV3_7G010240/CsaV3_4G000560/CsaV3_6G008140/CsaV3_5G028880/CsaV3_5G026050/CsaV3_3G043020/CsaV3_1G042050/CsaV3_2G015280/CsaV3_2G033820/CsaV3_7G008280/CsaV3_1G030920/CsaV3_2G011840/CsaV3_2G016280/CsaV3_1G031480/CsaV3_3G0…	125	75	CsaV3_4G028790/CsaV3_4G008430/CsaV3_3G010290/CsaV3_3G017450/CsaV3_7G006730/CsaV3_1G042270/CsaV3_2G028690/CsaV3_7G010240/CsaV3_4G000560/CsaV3_6G008140/CsaV3_5G028880/CsaV3_5G026050/CsaV3_1G042050/CsaV3_2G015280/CsaV3_7G008280/CsaV3_2G016280/CsaV3_1G031480/CsaV3_3G035920/CsaV3_1G046070/CsaV3_6G040340/CsaV3_1G038260/CsaV3_3G021030/CsaV3_7G030560/CsaV3_2G010670/CsaV3_3G021690/CsaV3_5G038370/CsaV3_6G0…	50	CsaV3_6G045310/CsaV3_1G031130/CsaV3_7G021470/CsaV3_3G010300/CsaV3_4G003400/CsaV3_3G043020/CsaV3_2G033820/CsaV3_1G030920/CsaV3_2G011840/CsaV3_5G025000/CsaV3_5G005900/CsaV3_3G044050/CsaV3_1G003150/CsaV3_2G003300/CsaV3_5G013970/CsaV3_6G036360/CsaV3_3G016490/CsaV3_7G005980/CsaV3_2G030420/CsaV3_4G004380/CsaV3_3G004920/CsaV3_3G046850/CsaV3_5G034300/CsaV3_5G015730/CsaV3_2G014210/CsaV3_7G018620/CsaV3_4G0…
BP	GO:0006732	coenzyme metabolic process	42/2879	66/5818	0.0139837	0.316974	CsaV3_7G029140/CsaV3_7G021470/CsaV3_1G042270/CsaV3_4G000560/CsaV3_6G039940/CsaV3_2G004240/CsaV3_6G033760/CsaV3_2G015280/CsaV3_7G030460/CsaV3_3G035920/CsaV3_1G046070/CsaV3_1G008930/CsaV3_6G040340/CsaV3_1G008520/CsaV3_7G030490/CsaV3_3G033790/CsaV3_2G030420/CsaV3_1G042920/CsaV3_6G035980/CsaV3_1G039980/CsaV3_4G000530/CsaV3_6G048680/CsaV3_6G013500/CsaV3_3G036910/CsaV3_5G029170/CsaV3_5G038830/CsaV3_6G0…	CsaV3_7G029140/CsaV3_7G021470/CsaV3_1G042270/CsaV3_4G000560/CsaV3_6G039940/CsaV3_2G004240/CsaV3_6G033760/CsaV3_2G015280/CsaV3_7G030460/CsaV3_3G035920/CsaV3_1G046070/CsaV3_1G008930/CsaV3_6G040340/CsaV3_1G008520/CsaV3_7G030490/CsaV3_3G033790/CsaV3_2G030420/CsaV3_1G042920/CsaV3_6G035980/CsaV3_1G039980/CsaV3_4G000530/CsaV3_6G048680/CsaV3_6G013500/CsaV3_3G036910/CsaV3_5G029170/CsaV3_5G038830/CsaV3_6G0…	42	29	CsaV3_1G042270/CsaV3_4G000560/CsaV3_2G004240/CsaV3_6G033760/CsaV3_2G015280/CsaV3_7G030460/CsaV3_3G035920/CsaV3_1G046070/CsaV3_1G008930/CsaV3_6G040340/CsaV3_1G008520/CsaV3_7G030490/CsaV3_1G042920/CsaV3_6G035980/CsaV3_1G039980/CsaV3_4G000530/CsaV3_6G048680/CsaV3_6G013500/CsaV3_3G036910/CsaV3_5G029170/CsaV3_5G038830/CsaV3_6G040390/CsaV3_1G041840/CsaV3_6G048080/CsaV3_4G004200/CsaV3_4G008960/CsaV3_2G0…	13	CsaV3_7G029140/CsaV3_7G021470/CsaV3_6G039940/CsaV3_3G033790/CsaV3_2G030420/CsaV3_6G034080/CsaV3_4G013530/CsaV3_6G036910/CsaV3_5G028490/CsaV3_4G037690/CsaV3_3G009100/CsaV3_6G038720/CsaV3_6G040430
BP	GO:0046486	glycerolipid metabolic process	23/2879	33/5818	0.0149072	0.316974	CsaV3_6G037410/CsaV3_7G033960/CsaV3_5G028680/CsaV3_5G013590/CsaV3_7G021690/CsaV3_1G017150/CsaV3_1G042370/CsaV3_1G044910/CsaV3_4G028490/CsaV3_1G042220/CsaV3_5G036790/CsaV3_3G046520/CsaV3_4G022060/CsaV3_2G015040/CsaV3_1G033210/CsaV3_5G034740/CsaV3_6G048460/CsaV3_3G001560/CsaV3_6G049640/CsaV3_3G036240/CsaV3_3G044460/CsaV3_7G001350/CsaV3_5G023290	CsaV3_6G037410/CsaV3_7G033960/CsaV3_5G028680/CsaV3_5G013590/CsaV3_7G021690/CsaV3_1G017150/CsaV3_1G042370/CsaV3_1G044910/CsaV3_4G028490/CsaV3_1G042220/CsaV3_5G036790/CsaV3_3G046520/CsaV3_4G022060/CsaV3_2G015040/CsaV3_1G033210/CsaV3_5G034740/CsaV3_6G048460/CsaV3_3G001560/CsaV3_6G049640/CsaV3_3G036240/CsaV3_3G044460/CsaV3_7G001350/CsaV3_5G023290	23	12	CsaV3_6G037410/CsaV3_7G033960/CsaV3_5G028680/CsaV3_1G017150/CsaV3_4G028490/CsaV3_1G042220/CsaV3_4G022060/CsaV3_2G015040/CsaV3_1G033210/CsaV3_6G048460/CsaV3_3G001560/CsaV3_3G044460	11	CsaV3_5G013590/CsaV3_7G021690/CsaV3_1G042370/CsaV3_1G044910/CsaV3_5G036790/CsaV3_3G046520/CsaV3_5G034740/CsaV3_6G049640/CsaV3_3G036240/CsaV3_7G001350/CsaV3_5G023290
BP	GO:0006334	nucleosome assembly	357848	1431356	0.0175927	0.316974	CsaV3_6G046960/CsaV3_6G036780/CsaV3_3G020800/CsaV3_5G028310/CsaV3_6G044170/CsaV3_4G000180/CsaV3_5G037970/CsaV3_2G001410/CsaV3_3G043700/CsaV3_1G005360	CsaV3_6G046960/CsaV3_6G036780/CsaV3_3G020800/CsaV3_5G028310/CsaV3_6G044170/CsaV3_4G000180/CsaV3_5G037970/CsaV3_2G001410/CsaV3_3G043700/CsaV3_1G005360	10	7	CsaV3_6G046960/CsaV3_6G036780/CsaV3_3G020800/CsaV3_5G028310/CsaV3_6G044170/CsaV3_2G001410/CsaV3_3G043700	3	CsaV3_4G000180/CsaV3_5G037970/CsaV3_1G005360
BP	GO:0009247	glycolipid biosynthetic process	357848	1431356	0.0175927	0.316974	CsaV3_2G032580/CsaV3_6G015560/CsaV3_1G042370/CsaV3_1G042220/CsaV3_4G022060/CsaV3_2G003280/CsaV3_1G033210/CsaV3_3G001560/CsaV3_5G015780/CsaV3_7G001350	CsaV3_2G032580/CsaV3_6G015560/CsaV3_1G042370/CsaV3_1G042220/CsaV3_4G022060/CsaV3_2G003280/CsaV3_1G033210/CsaV3_3G001560/CsaV3_5G015780/CsaV3_7G001350	10	4	CsaV3_1G042220/CsaV3_4G022060/CsaV3_1G033210/CsaV3_3G001560	6	CsaV3_2G032580/CsaV3_6G015560/CsaV3_1G042370/CsaV3_2G003280/CsaV3_5G015780/CsaV3_7G001350
BP	GO:0031497	chromatin assembly	357848	1431356	0.0175927	0.316974	CsaV3_6G046960/CsaV3_6G036780/CsaV3_3G020800/CsaV3_5G028310/CsaV3_6G044170/CsaV3_4G000180/CsaV3_5G037970/CsaV3_2G001410/CsaV3_3G043700/CsaV3_1G005360	CsaV3_6G046960/CsaV3_6G036780/CsaV3_3G020800/CsaV3_5G028310/CsaV3_6G044170/CsaV3_4G000180/CsaV3_5G037970/CsaV3_2G001410/CsaV3_3G043700/CsaV3_1G005360	10	7	CsaV3_6G046960/CsaV3_6G036780/CsaV3_3G020800/CsaV3_5G028310/CsaV3_6G044170/CsaV3_2G001410/CsaV3_3G043700	3	CsaV3_4G000180/CsaV3_5G037970/CsaV3_1G005360
BP	GO:0034728	nucleosome organization	357848	1431356	0.0175927	0.316974	CsaV3_6G046960/CsaV3_6G036780/CsaV3_3G020800/CsaV3_5G028310/CsaV3_6G044170/CsaV3_4G000180/CsaV3_5G037970/CsaV3_2G001410/CsaV3_3G043700/CsaV3_1G005360	CsaV3_6G046960/CsaV3_6G036780/CsaV3_3G020800/CsaV3_5G028310/CsaV3_6G044170/CsaV3_4G000180/CsaV3_5G037970/CsaV3_2G001410/CsaV3_3G043700/CsaV3_1G005360	10	7	CsaV3_6G046960/CsaV3_6G036780/CsaV3_3G020800/CsaV3_5G028310/CsaV3_6G044170/CsaV3_2G001410/CsaV3_3G043700	3	CsaV3_4G000180/CsaV3_5G037970/CsaV3_1G005360
BP	GO:0046467	membrane lipid biosynthetic process	357848	1431356	0.0175927	0.316974	CsaV3_2G032580/CsaV3_6G015560/CsaV3_1G042370/CsaV3_1G042220/CsaV3_4G022060/CsaV3_2G003280/CsaV3_1G033210/CsaV3_3G001560/CsaV3_5G015780/CsaV3_7G001350	CsaV3_2G032580/CsaV3_6G015560/CsaV3_1G042370/CsaV3_1G042220/CsaV3_4G022060/CsaV3_2G003280/CsaV3_1G033210/CsaV3_3G001560/CsaV3_5G015780/CsaV3_7G001350	10	4	CsaV3_1G042220/CsaV3_4G022060/CsaV3_1G033210/CsaV3_3G001560	6	CsaV3_2G032580/CsaV3_6G015560/CsaV3_1G042370/CsaV3_2G003280/CsaV3_5G015780/CsaV3_7G001350
BP	GO:0006643	membrane lipid metabolic process	15/2879	20/5818	0.0183517	0.316974	CsaV3_2G032580/CsaV3_3G010870/CsaV3_6G015560/CsaV3_2G011410/CsaV3_1G042370/CsaV3_1G042220/CsaV3_3G046520/CsaV3_4G022060/CsaV3_2G003280/CsaV3_6G048550/CsaV3_1G033210/CsaV3_3G001560/CsaV3_5G014080/CsaV3_5G015780/CsaV3_7G001350	CsaV3_2G032580/CsaV3_3G010870/CsaV3_6G015560/CsaV3_2G011410/CsaV3_1G042370/CsaV3_1G042220/CsaV3_3G046520/CsaV3_4G022060/CsaV3_2G003280/CsaV3_6G048550/CsaV3_1G033210/CsaV3_3G001560/CsaV3_5G014080/CsaV3_5G015780/CsaV3_7G001350	15	6	CsaV3_3G010870/CsaV3_1G042220/CsaV3_4G022060/CsaV3_1G033210/CsaV3_3G001560/CsaV3_5G014080	9	CsaV3_2G032580/CsaV3_6G015560/CsaV3_2G011410/CsaV3_1G042370/CsaV3_3G046520/CsaV3_2G003280/CsaV3_6G048550/CsaV3_5G015780/CsaV3_7G001350
BP	GO:0015711	organic anion transport	18/2879	25/5818	0.0189126	0.316974	CsaV3_3G030290/CsaV3_6G037030/CsaV3_4G007780/CsaV3_1G043680/CsaV3_6G042760/CsaV3_6G008570/CsaV3_1G043760/CsaV3_1G043750/CsaV3_5G002280/CsaV3_6G004330/CsaV3_1G000720/CsaV3_5G034160/CsaV3_1G037390/CsaV3_1G003740/CsaV3_5G034670/CsaV3_7G007920/CsaV3_1G018420/novel.460	CsaV3_3G030290/CsaV3_6G037030/CsaV3_4G007780/CsaV3_1G043680/CsaV3_6G042760/CsaV3_6G008570/CsaV3_1G043760/CsaV3_1G043750/CsaV3_5G002280/CsaV3_6G004330/CsaV3_1G000720/CsaV3_5G034160/CsaV3_1G037390/CsaV3_1G003740/CsaV3_5G034670/CsaV3_7G007920/CsaV3_1G018420/-	18	14	CsaV3_3G030290/CsaV3_6G037030/CsaV3_4G007780/CsaV3_1G043680/CsaV3_6G042760/CsaV3_6G008570/CsaV3_1G043760/CsaV3_6G004330/CsaV3_5G034160/CsaV3_1G037390/CsaV3_5G034670/CsaV3_7G007920/CsaV3_1G018420/novel.460	4	CsaV3_1G043750/CsaV3_5G002280/CsaV3_1G000720/CsaV3_1G003740
BP	GO:0015849	organic acid transport	18/2879	25/5818	0.0189126	0.316974	CsaV3_3G030290/CsaV3_6G037030/CsaV3_4G007780/CsaV3_1G043680/CsaV3_6G042760/CsaV3_6G008570/CsaV3_1G043760/CsaV3_1G043750/CsaV3_5G002280/CsaV3_6G004330/CsaV3_1G000720/CsaV3_5G034160/CsaV3_1G037390/CsaV3_1G003740/CsaV3_5G034670/CsaV3_7G007920/CsaV3_1G018420/novel.460	CsaV3_3G030290/CsaV3_6G037030/CsaV3_4G007780/CsaV3_1G043680/CsaV3_6G042760/CsaV3_6G008570/CsaV3_1G043760/CsaV3_1G043750/CsaV3_5G002280/CsaV3_6G004330/CsaV3_1G000720/CsaV3_5G034160/CsaV3_1G037390/CsaV3_1G003740/CsaV3_5G034670/CsaV3_7G007920/CsaV3_1G018420/-	18	14	CsaV3_3G030290/CsaV3_6G037030/CsaV3_4G007780/CsaV3_1G043680/CsaV3_6G042760/CsaV3_6G008570/CsaV3_1G043760/CsaV3_6G004330/CsaV3_5G034160/CsaV3_1G037390/CsaV3_5G034670/CsaV3_7G007920/CsaV3_1G018420/novel.460	4	CsaV3_1G043750/CsaV3_5G002280/CsaV3_1G000720/CsaV3_1G003740
BP	GO:0046942	carboxylic acid transport	18/2879	25/5818	0.0189126	0.316974	CsaV3_3G030290/CsaV3_6G037030/CsaV3_4G007780/CsaV3_1G043680/CsaV3_6G042760/CsaV3_6G008570/CsaV3_1G043760/CsaV3_1G043750/CsaV3_5G002280/CsaV3_6G004330/CsaV3_1G000720/CsaV3_5G034160/CsaV3_1G037390/CsaV3_1G003740/CsaV3_5G034670/CsaV3_7G007920/CsaV3_1G018420/novel.460	CsaV3_3G030290/CsaV3_6G037030/CsaV3_4G007780/CsaV3_1G043680/CsaV3_6G042760/CsaV3_6G008570/CsaV3_1G043760/CsaV3_1G043750/CsaV3_5G002280/CsaV3_6G004330/CsaV3_1G000720/CsaV3_5G034160/CsaV3_1G037390/CsaV3_1G003740/CsaV3_5G034670/CsaV3_7G007920/CsaV3_1G018420/-	18	14	CsaV3_3G030290/CsaV3_6G037030/CsaV3_4G007780/CsaV3_1G043680/CsaV3_6G042760/CsaV3_6G008570/CsaV3_1G043760/CsaV3_6G004330/CsaV3_5G034160/CsaV3_1G037390/CsaV3_5G034670/CsaV3_7G007920/CsaV3_1G018420/novel.460	4	CsaV3_1G043750/CsaV3_5G002280/CsaV3_1G000720/CsaV3_1G003740
BP	GO:0044283	small molecule biosynthetic process	82/2879	141/5818	0.02263	0.341961	CsaV3_1G036050/CsaV3_4G028790/CsaV3_6G045310/CsaV3_3G010290/CsaV3_6G003290/CsaV3_1G031130/CsaV3_3G017450/CsaV3_7G021470/CsaV3_3G010300/CsaV3_7G006730/CsaV3_1G042270/CsaV3_2G028690/CsaV3_4G000560/CsaV3_5G026050/CsaV3_6G033760/CsaV3_3G043020/CsaV3_2G015280/CsaV3_3G047700/CsaV3_1G030920/CsaV3_1G031480/CsaV3_3G035920/CsaV3_5G025000/CsaV3_1G046070/CsaV3_6G040340/CsaV3_1G038260/CsaV3_2G003300/CsaV3_3G0…	CsaV3_1G036050/CsaV3_4G028790/CsaV3_6G045310/CsaV3_3G010290/CsaV3_6G003290/CsaV3_1G031130/CsaV3_3G017450/CsaV3_7G021470/CsaV3_3G010300/CsaV3_7G006730/CsaV3_1G042270/CsaV3_2G028690/CsaV3_4G000560/CsaV3_5G026050/CsaV3_6G033760/CsaV3_3G043020/CsaV3_2G015280/CsaV3_3G047700/CsaV3_1G030920/CsaV3_1G031480/CsaV3_3G035920/CsaV3_5G025000/CsaV3_1G046070/CsaV3_6G040340/CsaV3_1G038260/CsaV3_2G003300/CsaV3_3G0…	82	50	CsaV3_1G036050/CsaV3_4G028790/CsaV3_3G010290/CsaV3_3G017450/CsaV3_7G006730/CsaV3_1G042270/CsaV3_2G028690/CsaV3_4G000560/CsaV3_5G026050/CsaV3_6G033760/CsaV3_2G015280/CsaV3_1G031480/CsaV3_3G035920/CsaV3_1G046070/CsaV3_6G040340/CsaV3_1G038260/CsaV3_3G021030/CsaV3_7G030560/CsaV3_2G010670/CsaV3_3G021690/CsaV3_6G048980/CsaV3_6G040130/CsaV3_1G039980/CsaV3_6G048680/CsaV3_6G013500/CsaV3_5G002520/CsaV3_2G0…	32	CsaV3_6G045310/CsaV3_6G003290/CsaV3_1G031130/CsaV3_7G021470/CsaV3_3G010300/CsaV3_3G043020/CsaV3_3G047700/CsaV3_1G030920/CsaV3_5G025000/CsaV3_2G003300/CsaV3_3G033790/CsaV3_6G036360/CsaV3_3G016490/CsaV3_7G005980/CsaV3_2G030420/CsaV3_5G034300/CsaV3_2G014210/CsaV3_7G018620/CsaV3_7G021780/CsaV3_5G033360/CsaV3_6G006560/CsaV3_4G013530/CsaV3_6G036910/CsaV3_6G021500/CsaV3_4G037690/CsaV3_5G014440/CsaV3_2G0…
BP	GO:0006790	sulfur compound metabolic process	19/2879	27/5818	0.0227918	0.341961	CsaV3_1G036050/CsaV3_7G029140/CsaV3_6G039940/CsaV3_3G043020/CsaV3_7G030460/CsaV3_2G011840/CsaV3_6G044100/CsaV3_7G030490/CsaV3_2G001680/CsaV3_6G012280/CsaV3_3G043250/CsaV3_7G018620/CsaV3_7G030190/CsaV3_6G045790/CsaV3_4G000200/CsaV3_3G049370/CsaV3_3G040500/CsaV3_4G030380/CsaV3_5G029830	CsaV3_1G036050/CsaV3_7G029140/CsaV3_6G039940/CsaV3_3G043020/CsaV3_7G030460/CsaV3_2G011840/CsaV3_6G044100/CsaV3_7G030490/CsaV3_2G001680/CsaV3_6G012280/CsaV3_3G043250/CsaV3_7G018620/CsaV3_7G030190/CsaV3_6G045790/CsaV3_4G000200/CsaV3_3G049370/CsaV3_3G040500/CsaV3_4G030380/CsaV3_5G029830	19	9	CsaV3_1G036050/CsaV3_7G030460/CsaV3_7G030490/CsaV3_2G001680/CsaV3_7G030190/CsaV3_6G045790/CsaV3_4G000200/CsaV3_3G049370/CsaV3_3G040500	10	CsaV3_7G029140/CsaV3_6G039940/CsaV3_3G043020/CsaV3_2G011840/CsaV3_6G044100/CsaV3_6G012280/CsaV3_3G043250/CsaV3_7G018620/CsaV3_4G030380/CsaV3_5G029830
BP	GO:0071103	DNA conformation change	16/2879	22/5818	0.0232322	0.341961	CsaV3_6G046960/CsaV3_6G036780/CsaV3_3G020800/CsaV3_5G028310/CsaV3_6G044170/CsaV3_4G029550/CsaV3_4G000180/CsaV3_3G004550/CsaV3_5G037970/CsaV3_3G015890/CsaV3_4G023800/CsaV3_2G001410/CsaV3_3G047220/CsaV3_3G043700/CsaV3_1G005360/novel.387	CsaV3_6G046960/CsaV3_6G036780/CsaV3_3G020800/CsaV3_5G028310/CsaV3_6G044170/CsaV3_4G029550/CsaV3_4G000180/CsaV3_3G004550/CsaV3_5G037970/CsaV3_3G015890/CsaV3_4G023800/CsaV3_2G001410/CsaV3_3G047220/CsaV3_3G043700/CsaV3_1G005360/-	16	9	CsaV3_6G046960/CsaV3_6G036780/CsaV3_3G020800/CsaV3_5G028310/CsaV3_6G044170/CsaV3_3G015890/CsaV3_4G023800/CsaV3_2G001410/CsaV3_3G043700	7	CsaV3_4G029550/CsaV3_4G000180/CsaV3_3G004550/CsaV3_5G037970/CsaV3_3G047220/CsaV3_1G005360/novel.387
BP	GO:0072330	monocarboxylic acid biosynthetic process	41/2879	66/5818	0.0257766	0.341961	CsaV3_4G028790/CsaV3_3G010290/CsaV3_1G031130/CsaV3_3G017450/CsaV3_7G021470/CsaV3_3G010300/CsaV3_2G028690/CsaV3_2G015280/CsaV3_1G030920/CsaV3_3G035920/CsaV3_1G046070/CsaV3_6G040340/CsaV3_2G010670/CsaV3_3G016490/CsaV3_2G030420/CsaV3_1G039980/CsaV3_6G048680/CsaV3_5G034300/CsaV3_6G013500/CsaV3_5G002520/CsaV3_5G033360/CsaV3_3G036910/CsaV3_3G007660/CsaV3_5G029170/CsaV3_6G040390/CsaV3_1G033910/CsaV3_6G0…	CsaV3_4G028790/CsaV3_3G010290/CsaV3_1G031130/CsaV3_3G017450/CsaV3_7G021470/CsaV3_3G010300/CsaV3_2G028690/CsaV3_2G015280/CsaV3_1G030920/CsaV3_3G035920/CsaV3_1G046070/CsaV3_6G040340/CsaV3_2G010670/CsaV3_3G016490/CsaV3_2G030420/CsaV3_1G039980/CsaV3_6G048680/CsaV3_5G034300/CsaV3_6G013500/CsaV3_5G002520/CsaV3_5G033360/CsaV3_3G036910/CsaV3_3G007660/CsaV3_5G029170/CsaV3_6G040390/CsaV3_1G033910/CsaV3_6G0…	41	28	CsaV3_4G028790/CsaV3_3G010290/CsaV3_3G017450/CsaV3_2G028690/CsaV3_2G015280/CsaV3_3G035920/CsaV3_1G046070/CsaV3_6G040340/CsaV3_2G010670/CsaV3_1G039980/CsaV3_6G048680/CsaV3_6G013500/CsaV3_5G002520/CsaV3_3G036910/CsaV3_3G007660/CsaV3_5G029170/CsaV3_6G040390/CsaV3_1G033910/CsaV3_6G048080/CsaV3_4G004200/CsaV3_5G032610/CsaV3_4G008960/CsaV3_1G029420/CsaV3_6G052510/CsaV3_5G003990/CsaV3_4G036210/CsaV3_2G0…	13	CsaV3_1G031130/CsaV3_7G021470/CsaV3_3G010300/CsaV3_1G030920/CsaV3_3G016490/CsaV3_2G030420/CsaV3_5G034300/CsaV3_5G033360/CsaV3_6G006560/CsaV3_6G036910/CsaV3_4G037690/CsaV3_3G043140/CsaV3_6G040430
BP	GO:0006575	cellular modified amino acid metabolic process	357879	14/5818	0.0261164	0.341961	CsaV3_1G042270/CsaV3_4G000560/CsaV3_5G028680/CsaV3_2G001680/CsaV3_6G045790/CsaV3_5G034740/CsaV3_4G013530/CsaV3_6G036910/CsaV3_3G009100/CsaV3_4G030380/CsaV3_5G008630	CsaV3_1G042270/CsaV3_4G000560/CsaV3_5G028680/CsaV3_2G001680/CsaV3_6G045790/CsaV3_5G034740/CsaV3_4G013530/CsaV3_6G036910/CsaV3_3G009100/CsaV3_4G030380/CsaV3_5G008630	11	6	CsaV3_1G042270/CsaV3_4G000560/CsaV3_5G028680/CsaV3_2G001680/CsaV3_6G045790/CsaV3_5G008630	5	CsaV3_5G034740/CsaV3_4G013530/CsaV3_6G036910/CsaV3_3G009100/CsaV3_4G030380
BP	GO:0006664	glycolipid metabolic process	357879	14/5818	0.0261164	0.341961	CsaV3_2G032580/CsaV3_6G015560/CsaV3_1G042370/CsaV3_1G042220/CsaV3_3G046520/CsaV3_4G022060/CsaV3_2G003280/CsaV3_1G033210/CsaV3_3G001560/CsaV3_5G015780/CsaV3_7G001350	CsaV3_2G032580/CsaV3_6G015560/CsaV3_1G042370/CsaV3_1G042220/CsaV3_3G046520/CsaV3_4G022060/CsaV3_2G003280/CsaV3_1G033210/CsaV3_3G001560/CsaV3_5G015780/CsaV3_7G001350	11	4	CsaV3_1G042220/CsaV3_4G022060/CsaV3_1G033210/CsaV3_3G001560	7	CsaV3_2G032580/CsaV3_6G015560/CsaV3_1G042370/CsaV3_3G046520/CsaV3_2G003280/CsaV3_5G015780/CsaV3_7G001350
BP	GO:1903509	liposaccharide metabolic process	357879	14/5818	0.0261164	0.341961	CsaV3_2G032580/CsaV3_6G015560/CsaV3_1G042370/CsaV3_1G042220/CsaV3_3G046520/CsaV3_4G022060/CsaV3_2G003280/CsaV3_1G033210/CsaV3_3G001560/CsaV3_5G015780/CsaV3_7G001350	CsaV3_2G032580/CsaV3_6G015560/CsaV3_1G042370/CsaV3_1G042220/CsaV3_3G046520/CsaV3_4G022060/CsaV3_2G003280/CsaV3_1G033210/CsaV3_3G001560/CsaV3_5G015780/CsaV3_7G001350	11	4	CsaV3_1G042220/CsaV3_4G022060/CsaV3_1G033210/CsaV3_3G001560	7	CsaV3_2G032580/CsaV3_6G015560/CsaV3_1G042370/CsaV3_3G046520/CsaV3_2G003280/CsaV3_5G015780/CsaV3_7G001350
BP	GO:0042398	cellular modified amino acid biosynthetic process	357818	1431326	0.0301791	0.357692	CsaV3_1G042270/CsaV3_4G000560/CsaV3_5G028680/CsaV3_5G034740/CsaV3_4G013530/CsaV3_6G036910/CsaV3_3G009100/CsaV3_5G002830/CsaV3_5G008630	CsaV3_1G042270/CsaV3_4G000560/CsaV3_5G028680/CsaV3_5G034740/CsaV3_4G013530/CsaV3_6G036910/CsaV3_3G009100/CsaV3_5G002830/CsaV3_5G008630	9	5	CsaV3_1G042270/CsaV3_4G000560/CsaV3_5G028680/CsaV3_5G002830/CsaV3_5G008630	4	CsaV3_5G034740/CsaV3_4G013530/CsaV3_6G036910/CsaV3_3G009100
BP	GO:0006633	fatty acid biosynthetic process	21/2879	31/5818	0.0307842	0.357692	CsaV3_4G028790/CsaV3_3G010290/CsaV3_1G031130/CsaV3_3G017450/CsaV3_3G010300/CsaV3_2G028690/CsaV3_1G030920/CsaV3_2G010670/CsaV3_3G016490/CsaV3_5G034300/CsaV3_5G002520/CsaV3_3G007660/CsaV3_1G033910/CsaV3_6G006560/CsaV3_5G032610/CsaV3_1G029420/CsaV3_3G043140/CsaV3_6G052510/CsaV3_5G003990/CsaV3_4G036210/CsaV3_3G012730	CsaV3_4G028790/CsaV3_3G010290/CsaV3_1G031130/CsaV3_3G017450/CsaV3_3G010300/CsaV3_2G028690/CsaV3_1G030920/CsaV3_2G010670/CsaV3_3G016490/CsaV3_5G034300/CsaV3_5G002520/CsaV3_3G007660/CsaV3_1G033910/CsaV3_6G006560/CsaV3_5G032610/CsaV3_1G029420/CsaV3_3G043140/CsaV3_6G052510/CsaV3_5G003990/CsaV3_4G036210/CsaV3_3G012730	21	14	CsaV3_4G028790/CsaV3_3G010290/CsaV3_3G017450/CsaV3_2G028690/CsaV3_2G010670/CsaV3_5G002520/CsaV3_3G007660/CsaV3_1G033910/CsaV3_5G032610/CsaV3_1G029420/CsaV3_6G052510/CsaV3_5G003990/CsaV3_4G036210/CsaV3_3G012730	7	CsaV3_1G031130/CsaV3_3G010300/CsaV3_1G030920/CsaV3_3G016490/CsaV3_5G034300/CsaV3_6G006560/CsaV3_3G043140
BP	GO:0019637	organophosphate metabolic process	86/2879	150/5818	0.0309492	0.357692	CsaV3_6G037410/CsaV3_7G029140/CsaV3_7G021470/CsaV3_7G010240/CsaV3_2G004240/CsaV3_2G036570/CsaV3_2G015280/CsaV3_7G033960/CsaV3_5G028680/CsaV3_6G049050/CsaV3_5G013590/CsaV3_3G035920/CsaV3_6G015560/CsaV3_1G010750/CsaV3_1G046070/CsaV3_1G008930/CsaV3_6G040340/CsaV3_7G021690/CsaV3_1G008520/CsaV3_1G017150/CsaV3_5G033710/CsaV3_3G033790/CsaV3_UNG210320/CsaV3_2G030420/CsaV3_1G042370/CsaV3_1G042920/CsaV3_1G…	CsaV3_6G037410/CsaV3_7G029140/CsaV3_7G021470/CsaV3_7G010240/CsaV3_2G004240/CsaV3_2G036570/CsaV3_2G015280/CsaV3_7G033960/CsaV3_5G028680/CsaV3_6G049050/CsaV3_5G013590/CsaV3_3G035920/CsaV3_6G015560/CsaV3_1G010750/CsaV3_1G046070/CsaV3_1G008930/CsaV3_6G040340/CsaV3_7G021690/CsaV3_1G008520/CsaV3_1G017150/CsaV3_5G033710/CsaV3_3G033790/CsaV3_UNG210320/CsaV3_2G030420/CsaV3_1G042370/CsaV3_1G042920/CsaV3_1G…	86	51	CsaV3_6G037410/CsaV3_7G010240/CsaV3_2G004240/CsaV3_2G036570/CsaV3_2G015280/CsaV3_7G033960/CsaV3_5G028680/CsaV3_6G049050/CsaV3_3G035920/CsaV3_1G010750/CsaV3_1G046070/CsaV3_1G008930/CsaV3_6G040340/CsaV3_1G008520/CsaV3_1G017150/CsaV3_5G033710/CsaV3_1G042920/CsaV3_6G035980/CsaV3_2G036580/CsaV3_4G028490/CsaV3_1G039980/CsaV3_1G042220/CsaV3_4G000530/CsaV3_6G048680/CsaV3_4G022060/CsaV3_6G013500/CsaV3_2G0…	35	CsaV3_7G029140/CsaV3_7G021470/CsaV3_5G013590/CsaV3_6G015560/CsaV3_7G021690/CsaV3_3G033790/CsaV3_UNG210320/CsaV3_2G030420/CsaV3_1G042370/CsaV3_1G044910/CsaV3_5G036790/CsaV3_3G046520/CsaV3_3G015600/CsaV3_UNG210000/CsaV3_5G006440/CsaV3_5G004310/CsaV3_6G034080/CsaV3_1G005960/CsaV3_5G034740/CsaV3_2G028630/CsaV3_5G028490/CsaV3_6G049640/CsaV3_4G037690/CsaV3_3G036240/CsaV3_6G038720/CsaV3_7G006180/CsaV3_5…
BP	GO:0009719	response to endogenous stimulus	30/2879	47/5818	0.033255	0.357692	CsaV3_5G001910/CsaV3_6G047000/CsaV3_6G007970/CsaV3_1G000090/CsaV3_6G040760/CsaV3_6G052060/CsaV3_2G015380/CsaV3_7G025380/CsaV3_5G000180/CsaV3_2G001050/CsaV3_3G030900/CsaV3_6G013600/CsaV3_1G036890/CsaV3_6G050480/CsaV3_5G020230/CsaV3_6G008790/CsaV3_6G036480/CsaV3_7G000560/CsaV3_7G000690/CsaV3_7G022810/CsaV3_6G039750/CsaV3_6G039630/CsaV3_6G021720/CsaV3_6G001030/CsaV3_6G013960/CsaV3_5G015710/CsaV3_3G0…	CsaV3_5G001910/CsaV3_6G047000/CsaV3_6G007970/CsaV3_1G000090/CsaV3_6G040760/CsaV3_6G052060/CsaV3_2G015380/CsaV3_7G025380/CsaV3_5G000180/CsaV3_2G001050/CsaV3_3G030900/CsaV3_6G013600/CsaV3_1G036890/CsaV3_6G050480/CsaV3_5G020230/CsaV3_6G008790/CsaV3_6G036480/CsaV3_7G000560/CsaV3_7G000690/CsaV3_7G022810/CsaV3_6G039750/CsaV3_6G039630/CsaV3_6G021720/CsaV3_6G001030/CsaV3_6G013960/CsaV3_5G015710/CsaV3_3G0…	30	13	CsaV3_6G047000/CsaV3_2G015380/CsaV3_7G025380/CsaV3_5G000180/CsaV3_6G013600/CsaV3_6G008790/CsaV3_7G022810/CsaV3_6G039630/CsaV3_6G001030/CsaV3_6G013960/CsaV3_3G027500/CsaV3_4G031250/CsaV3_2G015370	17	CsaV3_5G001910/CsaV3_6G007970/CsaV3_1G000090/CsaV3_6G040760/CsaV3_6G052060/CsaV3_2G001050/CsaV3_3G030900/CsaV3_1G036890/CsaV3_6G050480/CsaV3_5G020230/CsaV3_6G036480/CsaV3_7G000560/CsaV3_7G000690/CsaV3_6G039750/CsaV3_6G021720/CsaV3_5G015710/CsaV3_3G045710
BP	GO:0009725	response to hormone	30/2879	47/5818	0.033255	0.357692	CsaV3_5G001910/CsaV3_6G047000/CsaV3_6G007970/CsaV3_1G000090/CsaV3_6G040760/CsaV3_6G052060/CsaV3_2G015380/CsaV3_7G025380/CsaV3_5G000180/CsaV3_2G001050/CsaV3_3G030900/CsaV3_6G013600/CsaV3_1G036890/CsaV3_6G050480/CsaV3_5G020230/CsaV3_6G008790/CsaV3_6G036480/CsaV3_7G000560/CsaV3_7G000690/CsaV3_7G022810/CsaV3_6G039750/CsaV3_6G039630/CsaV3_6G021720/CsaV3_6G001030/CsaV3_6G013960/CsaV3_5G015710/CsaV3_3G0…	CsaV3_5G001910/CsaV3_6G047000/CsaV3_6G007970/CsaV3_1G000090/CsaV3_6G040760/CsaV3_6G052060/CsaV3_2G015380/CsaV3_7G025380/CsaV3_5G000180/CsaV3_2G001050/CsaV3_3G030900/CsaV3_6G013600/CsaV3_1G036890/CsaV3_6G050480/CsaV3_5G020230/CsaV3_6G008790/CsaV3_6G036480/CsaV3_7G000560/CsaV3_7G000690/CsaV3_7G022810/CsaV3_6G039750/CsaV3_6G039630/CsaV3_6G021720/CsaV3_6G001030/CsaV3_6G013960/CsaV3_5G015710/CsaV3_3G0…	30	13	CsaV3_6G047000/CsaV3_2G015380/CsaV3_7G025380/CsaV3_5G000180/CsaV3_6G013600/CsaV3_6G008790/CsaV3_7G022810/CsaV3_6G039630/CsaV3_6G001030/CsaV3_6G013960/CsaV3_3G027500/CsaV3_4G031250/CsaV3_2G015370	17	CsaV3_5G001910/CsaV3_6G007970/CsaV3_1G000090/CsaV3_6G040760/CsaV3_6G052060/CsaV3_2G001050/CsaV3_3G030900/CsaV3_1G036890/CsaV3_6G050480/CsaV3_5G020230/CsaV3_6G036480/CsaV3_7G000560/CsaV3_7G000690/CsaV3_6G039750/CsaV3_6G021720/CsaV3_5G015710/CsaV3_3G045710
BP	GO:0010033	response to organic substance	30/2879	47/5818	0.033255	0.357692	CsaV3_5G001910/CsaV3_6G047000/CsaV3_6G007970/CsaV3_1G000090/CsaV3_6G040760/CsaV3_6G052060/CsaV3_2G015380/CsaV3_7G025380/CsaV3_5G000180/CsaV3_2G001050/CsaV3_3G030900/CsaV3_6G013600/CsaV3_1G036890/CsaV3_6G050480/CsaV3_5G020230/CsaV3_6G008790/CsaV3_6G036480/CsaV3_7G000560/CsaV3_7G000690/CsaV3_7G022810/CsaV3_6G039750/CsaV3_6G039630/CsaV3_6G021720/CsaV3_6G001030/CsaV3_6G013960/CsaV3_5G015710/CsaV3_3G0…	CsaV3_5G001910/CsaV3_6G047000/CsaV3_6G007970/CsaV3_1G000090/CsaV3_6G040760/CsaV3_6G052060/CsaV3_2G015380/CsaV3_7G025380/CsaV3_5G000180/CsaV3_2G001050/CsaV3_3G030900/CsaV3_6G013600/CsaV3_1G036890/CsaV3_6G050480/CsaV3_5G020230/CsaV3_6G008790/CsaV3_6G036480/CsaV3_7G000560/CsaV3_7G000690/CsaV3_7G022810/CsaV3_6G039750/CsaV3_6G039630/CsaV3_6G021720/CsaV3_6G001030/CsaV3_6G013960/CsaV3_5G015710/CsaV3_3G0…	30	13	CsaV3_6G047000/CsaV3_2G015380/CsaV3_7G025380/CsaV3_5G000180/CsaV3_6G013600/CsaV3_6G008790/CsaV3_7G022810/CsaV3_6G039630/CsaV3_6G001030/CsaV3_6G013960/CsaV3_3G027500/CsaV3_4G031250/CsaV3_2G015370	17	CsaV3_5G001910/CsaV3_6G007970/CsaV3_1G000090/CsaV3_6G040760/CsaV3_6G052060/CsaV3_2G001050/CsaV3_3G030900/CsaV3_1G036890/CsaV3_6G050480/CsaV3_5G020230/CsaV3_6G036480/CsaV3_7G000560/CsaV3_7G000690/CsaV3_6G039750/CsaV3_6G021720/CsaV3_5G015710/CsaV3_3G045710
BP	GO:0051188	cofactor biosynthetic process	40/2879	65/5818	0.033296	0.357692	CsaV3_7G029140/CsaV3_7G021470/CsaV3_1G042270/CsaV3_4G000560/CsaV3_6G039940/CsaV3_2G025670/CsaV3_6G033760/CsaV3_1G000080/CsaV3_2G015280/CsaV3_7G030460/CsaV3_3G035920/CsaV3_1G046070/CsaV3_1G008930/CsaV3_6G040340/CsaV3_1G008520/CsaV3_6G013410/CsaV3_7G030490/CsaV3_3G033790/CsaV3_2G030420/CsaV3_1G042920/CsaV3_1G039980/CsaV3_4G000530/CsaV3_6G048680/CsaV3_6G013500/CsaV3_3G036910/CsaV3_5G029170/CsaV3_6G0…	CsaV3_7G029140/CsaV3_7G021470/CsaV3_1G042270/CsaV3_4G000560/CsaV3_6G039940/CsaV3_2G025670/CsaV3_6G033760/CsaV3_1G000080/CsaV3_2G015280/CsaV3_7G030460/CsaV3_3G035920/CsaV3_1G046070/CsaV3_1G008930/CsaV3_6G040340/CsaV3_1G008520/CsaV3_6G013410/CsaV3_7G030490/CsaV3_3G033790/CsaV3_2G030420/CsaV3_1G042920/CsaV3_1G039980/CsaV3_4G000530/CsaV3_6G048680/CsaV3_6G013500/CsaV3_3G036910/CsaV3_5G029170/CsaV3_6G0…	40	27	CsaV3_1G042270/CsaV3_4G000560/CsaV3_6G033760/CsaV3_1G000080/CsaV3_2G015280/CsaV3_7G030460/CsaV3_3G035920/CsaV3_1G046070/CsaV3_1G008930/CsaV3_6G040340/CsaV3_1G008520/CsaV3_6G013410/CsaV3_7G030490/CsaV3_1G042920/CsaV3_1G039980/CsaV3_4G000530/CsaV3_6G048680/CsaV3_6G013500/CsaV3_3G036910/CsaV3_5G029170/CsaV3_6G040390/CsaV3_1G041840/CsaV3_6G048080/CsaV3_4G004200/CsaV3_4G008960/CsaV3_2G013320/CsaV3_5G0…	13	CsaV3_7G029140/CsaV3_7G021470/CsaV3_6G039940/CsaV3_2G025670/CsaV3_3G033790/CsaV3_2G030420/CsaV3_6G034080/CsaV3_4G013530/CsaV3_6G036910/CsaV3_4G037690/CsaV3_3G009100/CsaV3_6G038720/CsaV3_6G040430
BP	GO:0006396	RNA processing	66/2879	113/5818	0.0341472	0.357692	CsaV3_3G017360/CsaV3_2G014840/CsaV3_3G042650/CsaV3_2G009090/CsaV3_5G040300/novel.1028/CsaV3_2G030670/CsaV3_5G005710/CsaV3_3G002270/CsaV3_7G033540/CsaV3_1G001270/CsaV3_5G002870/CsaV3_1G000640/CsaV3_1G037130/CsaV3_7G029310/CsaV3_3G047700/CsaV3_1G044420/CsaV3_3G032240/CsaV3_6G041220/CsaV3_3G035920/CsaV3_6G013880/CsaV3_3G000350/CsaV3_2G001320/CsaV3_5G027420/CsaV3_7G035250/CsaV3_4G025970/CsaV3_4G01212…	CsaV3_3G017360/CsaV3_2G014840/CsaV3_3G042650/CsaV3_2G009090/CsaV3_5G040300/-/CsaV3_2G030670/CsaV3_5G005710/CsaV3_3G002270/CsaV3_7G033540/CsaV3_1G001270/CsaV3_5G002870/CsaV3_1G000640/CsaV3_1G037130/CsaV3_7G029310/CsaV3_3G047700/CsaV3_1G044420/CsaV3_3G032240/CsaV3_6G041220/CsaV3_3G035920/CsaV3_6G013880/CsaV3_3G000350/CsaV3_2G001320/CsaV3_5G027420/CsaV3_7G035250/CsaV3_4G025970/CsaV3_4G012120/CsaV3_2…	66	23	CsaV3_5G040300/novel.1028/CsaV3_2G030670/CsaV3_5G005710/CsaV3_5G002870/CsaV3_3G035920/CsaV3_5G027420/CsaV3_7G035250/CsaV3_4G012120/CsaV3_3G009910/CsaV3_6G031860/CsaV3_3G004310/CsaV3_2G017010/CsaV3_3G007100/CsaV3_3G006990/CsaV3_3G007360/CsaV3_2G008750/CsaV3_6G003310/CsaV3_7G024240/CsaV3_6G021540/CsaV3_7G028650/CsaV3_6G008590/CsaV3_3G009050	43	CsaV3_3G017360/CsaV3_2G014840/CsaV3_3G042650/CsaV3_2G009090/CsaV3_3G002270/CsaV3_7G033540/CsaV3_1G001270/CsaV3_1G000640/CsaV3_1G037130/CsaV3_7G029310/CsaV3_3G047700/CsaV3_1G044420/CsaV3_3G032240/CsaV3_6G041220/CsaV3_6G013880/CsaV3_3G000350/CsaV3_2G001320/CsaV3_4G025970/CsaV3_2G036420/CsaV3_3G041040/CsaV3_2G032530/CsaV3_2G032600/CsaV3_6G042090/CsaV3_3G035590/CsaV3_UNG210420/CsaV3_3G048450/CsaV3_5G…
BP	GO:0006323	DNA packaging	357848	13/5818	0.0424794	0.40649	CsaV3_6G046960/CsaV3_6G036780/CsaV3_3G020800/CsaV3_5G028310/CsaV3_6G044170/CsaV3_4G000180/CsaV3_5G037970/CsaV3_2G001410/CsaV3_3G043700/CsaV3_1G005360	CsaV3_6G046960/CsaV3_6G036780/CsaV3_3G020800/CsaV3_5G028310/CsaV3_6G044170/CsaV3_4G000180/CsaV3_5G037970/CsaV3_2G001410/CsaV3_3G043700/CsaV3_1G005360	10	7	CsaV3_6G046960/CsaV3_6G036780/CsaV3_3G020800/CsaV3_5G028310/CsaV3_6G044170/CsaV3_2G001410/CsaV3_3G043700	3	CsaV3_4G000180/CsaV3_5G037970/CsaV3_1G005360
BP	GO:0065004	protein-DNA complex assembly	357848	13/5818	0.0424794	0.40649	CsaV3_6G046960/CsaV3_6G036780/CsaV3_3G020800/CsaV3_5G028310/CsaV3_6G044170/CsaV3_4G000180/CsaV3_5G037970/CsaV3_2G001410/CsaV3_3G043700/CsaV3_1G005360	CsaV3_6G046960/CsaV3_6G036780/CsaV3_3G020800/CsaV3_5G028310/CsaV3_6G044170/CsaV3_4G000180/CsaV3_5G037970/CsaV3_2G001410/CsaV3_3G043700/CsaV3_1G005360	10	7	CsaV3_6G046960/CsaV3_6G036780/CsaV3_3G020800/CsaV3_5G028310/CsaV3_6G044170/CsaV3_2G001410/CsaV3_3G043700	3	CsaV3_4G000180/CsaV3_5G037970/CsaV3_1G005360
BP	GO:0071824	protein-DNA complex subunit organization	357848	13/5818	0.0424794	0.40649	CsaV3_6G046960/CsaV3_6G036780/CsaV3_3G020800/CsaV3_5G028310/CsaV3_6G044170/CsaV3_4G000180/CsaV3_5G037970/CsaV3_2G001410/CsaV3_3G043700/CsaV3_1G005360	CsaV3_6G046960/CsaV3_6G036780/CsaV3_3G020800/CsaV3_5G028310/CsaV3_6G044170/CsaV3_4G000180/CsaV3_5G037970/CsaV3_2G001410/CsaV3_3G043700/CsaV3_1G005360	10	7	CsaV3_6G046960/CsaV3_6G036780/CsaV3_3G020800/CsaV3_5G028310/CsaV3_6G044170/CsaV3_2G001410/CsaV3_3G043700	3	CsaV3_4G000180/CsaV3_5G037970/CsaV3_1G005360
BP	GO:0006090	pyruvate metabolic process	20/2879	30/5818	0.0434527	0.40649	CsaV3_7G021470/CsaV3_7G010240/CsaV3_2G015280/CsaV3_3G035920/CsaV3_1G046070/CsaV3_6G040340/CsaV3_2G030420/CsaV3_1G039980/CsaV3_6G048680/CsaV3_6G013500/CsaV3_2G014440/CsaV3_3G036910/CsaV3_5G029170/CsaV3_6G040390/CsaV3_6G048080/CsaV3_4G004200/CsaV3_4G037690/CsaV3_4G008960/CsaV3_2G013320/CsaV3_6G040430	CsaV3_7G021470/CsaV3_7G010240/CsaV3_2G015280/CsaV3_3G035920/CsaV3_1G046070/CsaV3_6G040340/CsaV3_2G030420/CsaV3_1G039980/CsaV3_6G048680/CsaV3_6G013500/CsaV3_2G014440/CsaV3_3G036910/CsaV3_5G029170/CsaV3_6G040390/CsaV3_6G048080/CsaV3_4G004200/CsaV3_4G037690/CsaV3_4G008960/CsaV3_2G013320/CsaV3_6G040430	20	16	CsaV3_7G010240/CsaV3_2G015280/CsaV3_3G035920/CsaV3_1G046070/CsaV3_6G040340/CsaV3_1G039980/CsaV3_6G048680/CsaV3_6G013500/CsaV3_2G014440/CsaV3_3G036910/CsaV3_5G029170/CsaV3_6G040390/CsaV3_6G048080/CsaV3_4G004200/CsaV3_4G008960/CsaV3_2G013320	4	CsaV3_7G021470/CsaV3_2G030420/CsaV3_4G037690/CsaV3_6G040430
BP	GO:0009312	oligosaccharide biosynthetic process	13/2879	18/5818	0.0436565	0.40649	CsaV3_3G003030/CsaV3_5G035080/CsaV3_3G038290/CsaV3_6G015560/CsaV3_5G031700/CsaV3_6G045560/CsaV3_6G051060/CsaV3_3G016150/CsaV3_1G032890/CsaV3_1G001640/CsaV3_7G002510/CsaV3_5G015780/CsaV3_3G001510	CsaV3_3G003030/CsaV3_5G035080/CsaV3_3G038290/CsaV3_6G015560/CsaV3_5G031700/CsaV3_6G045560/CsaV3_6G051060/CsaV3_3G016150/CsaV3_1G032890/CsaV3_1G001640/CsaV3_7G002510/CsaV3_5G015780/CsaV3_3G001510	13	2	CsaV3_3G038290/CsaV3_7G002510	11	CsaV3_3G003030/CsaV3_5G035080/CsaV3_6G015560/CsaV3_5G031700/CsaV3_6G045560/CsaV3_6G051060/CsaV3_3G016150/CsaV3_1G032890/CsaV3_1G001640/CsaV3_5G015780/CsaV3_3G001510
BP	GO:0008654	phospholipid biosynthetic process	17/2879	25/5818	0.0480968	0.438099	CsaV3_7G010240/CsaV3_5G028680/CsaV3_6G015560/CsaV3_5G033710/CsaV3_1G042370/CsaV3_1G042220/CsaV3_4G022060/CsaV3_2G014440/CsaV3_5G024400/CsaV3_5G006440/CsaV3_5G004310/CsaV3_1G033210/CsaV3_5G034740/CsaV3_3G001560/CsaV3_7G006180/CsaV3_5G015780/CsaV3_7G001350	CsaV3_7G010240/CsaV3_5G028680/CsaV3_6G015560/CsaV3_5G033710/CsaV3_1G042370/CsaV3_1G042220/CsaV3_4G022060/CsaV3_2G014440/CsaV3_5G024400/CsaV3_5G006440/CsaV3_5G004310/CsaV3_1G033210/CsaV3_5G034740/CsaV3_3G001560/CsaV3_7G006180/CsaV3_5G015780/CsaV3_7G001350	17	9	CsaV3_7G010240/CsaV3_5G028680/CsaV3_5G033710/CsaV3_1G042220/CsaV3_4G022060/CsaV3_2G014440/CsaV3_5G024400/CsaV3_1G033210/CsaV3_3G001560	8	CsaV3_6G015560/CsaV3_1G042370/CsaV3_5G006440/CsaV3_5G004310/CsaV3_5G034740/CsaV3_7G006180/CsaV3_5G015780/CsaV3_7G001350
CC	GO:0000785	chromatin	8/1006	74419	0.040685	0.998144	CsaV3_6G046960/CsaV3_6G036780/CsaV3_3G020800/CsaV3_5G028310/CsaV3_7G030020/CsaV3_6G044170/CsaV3_4G000180/CsaV3_3G043700	CsaV3_6G046960/CsaV3_6G036780/CsaV3_3G020800/CsaV3_5G028310/CsaV3_7G030020/CsaV3_6G044170/CsaV3_4G000180/CsaV3_3G043700	8	6	CsaV3_6G046960/CsaV3_6G036780/CsaV3_3G020800/CsaV3_5G028310/CsaV3_6G044170/CsaV3_3G043700	2	CsaV3_7G030020/CsaV3_4G000180
MF	GO:0042393	histone binding	13/4335	14/8696	0.000876049	0.24617	CsaV3_3G002320/CsaV3_3G027790/CsaV3_3G033750/CsaV3_4G031740/CsaV3_4G030410/CsaV3_5G010160/novel.1073/CsaV3_3G014070/CsaV3_6G032020/CsaV3_3G006760/CsaV3_3G011580/CsaV3_6G038290/CsaV3_7G034590	CsaV3_3G002320/CsaV3_3G027790/CsaV3_3G033750/CsaV3_4G031740/CsaV3_4G030410/CsaV3_5G010160/-/CsaV3_3G014070/CsaV3_6G032020/CsaV3_3G006760/CsaV3_3G011580/CsaV3_6G038290/CsaV3_7G034590	13	4	CsaV3_3G027790/CsaV3_6G032020/CsaV3_3G006760/CsaV3_3G011580	9	CsaV3_3G002320/CsaV3_3G033750/CsaV3_4G031740/CsaV3_4G030410/CsaV3_5G010160/novel.1073/CsaV3_3G014070/CsaV3_6G038290/CsaV3_7G034590
MF	GO:0003743	translation initiation factor activity	18/4335	23/8696	0.00505075	0.709631	CsaV3_2G015740/CsaV3_7G021830/CsaV3_1G023010/CsaV3_3G005110/CsaV3_3G019240/CsaV3_2G007620/CsaV3_7G022370/CsaV3_7G003720/CsaV3_1G032830/CsaV3_2G016200/CsaV3_5G010740/CsaV3_2G024990/CsaV3_5G024250/CsaV3_1G014460/CsaV3_3G043200/CsaV3_7G003030/CsaV3_3G048680/CsaV3_2G012490	CsaV3_2G015740/CsaV3_7G021830/CsaV3_1G023010/CsaV3_3G005110/CsaV3_3G019240/CsaV3_2G007620/CsaV3_7G022370/CsaV3_7G003720/CsaV3_1G032830/CsaV3_2G016200/CsaV3_5G010740/CsaV3_2G024990/CsaV3_5G024250/CsaV3_1G014460/CsaV3_3G043200/CsaV3_7G003030/CsaV3_3G048680/CsaV3_2G012490	18	6	CsaV3_2G015740/CsaV3_1G023010/CsaV3_2G007620/CsaV3_3G043200/CsaV3_7G003030/CsaV3_2G012490	12	CsaV3_7G021830/CsaV3_3G005110/CsaV3_3G019240/CsaV3_7G022370/CsaV3_7G003720/CsaV3_1G032830/CsaV3_2G016200/CsaV3_5G010740/CsaV3_2G024990/CsaV3_5G024250/CsaV3_1G014460/CsaV3_3G048680
MF	GO:0008135	translation factor activity, RNA binding	28/4335	40/8696	0.0077607	0.726919	CsaV3_5G029740/CsaV3_2G015740/CsaV3_6G002420/CsaV3_7G021830/CsaV3_1G023010/CsaV3_3G005110/CsaV3_3G017730/CsaV3_3G019240/CsaV3_3G006530/CsaV3_2G007620/CsaV3_7G022370/CsaV3_1G009580/CsaV3_7G003720/CsaV3_1G032830/CsaV3_2G016200/CsaV3_1G038310/CsaV3_5G010740/CsaV3_4G036580/CsaV3_2G024990/CsaV3_1G028950/CsaV3_5G024250/CsaV3_3G006520/CsaV3_1G014460/CsaV3_3G043200/CsaV3_7G003030/novel.619/CsaV3_3G048680…	CsaV3_5G029740/CsaV3_2G015740/CsaV3_6G002420/CsaV3_7G021830/CsaV3_1G023010/CsaV3_3G005110/CsaV3_3G017730/CsaV3_3G019240/CsaV3_3G006530/CsaV3_2G007620/CsaV3_7G022370/CsaV3_1G009580/CsaV3_7G003720/CsaV3_1G032830/CsaV3_2G016200/CsaV3_1G038310/CsaV3_5G010740/CsaV3_4G036580/CsaV3_2G024990/CsaV3_1G028950/CsaV3_5G024250/CsaV3_3G006520/CsaV3_1G014460/CsaV3_3G043200/CsaV3_7G003030/-/CsaV3_3G048680/CsaV3_2…	28	9	CsaV3_2G015740/CsaV3_1G023010/CsaV3_2G007620/CsaV3_4G036580/CsaV3_1G028950/CsaV3_3G043200/CsaV3_7G003030/novel.619/CsaV3_2G012490	19	CsaV3_5G029740/CsaV3_6G002420/CsaV3_7G021830/CsaV3_3G005110/CsaV3_3G017730/CsaV3_3G019240/CsaV3_3G006530/CsaV3_7G022370/CsaV3_1G009580/CsaV3_7G003720/CsaV3_1G032830/CsaV3_2G016200/CsaV3_1G038310/CsaV3_5G010740/CsaV3_2G024990/CsaV3_5G024250/CsaV3_3G006520/CsaV3_1G014460/CsaV3_3G048680
MF	GO:0044877	protein-containing complex binding	889671	13/8696	0.0108738	0.763887	CsaV3_2G019580/CsaV3_1G004920/CsaV3_4G036110/CsaV3_3G001260/CsaV3_2G014330/CsaV3_1G038920/CsaV3_6G042800/CsaV3_6G017380/CsaV3_4G036580/CsaV3_1G028950/CsaV3_2G007560	CsaV3_2G019580/CsaV3_1G004920/CsaV3_4G036110/CsaV3_3G001260/CsaV3_2G014330/CsaV3_1G038920/CsaV3_6G042800/CsaV3_6G017380/CsaV3_4G036580/CsaV3_1G028950/CsaV3_2G007560	11	6	CsaV3_1G004920/CsaV3_3G001260/CsaV3_1G038920/CsaV3_6G017380/CsaV3_4G036580/CsaV3_1G028950	5	CsaV3_2G019580/CsaV3_4G036110/CsaV3_2G014330/CsaV3_6G042800/CsaV3_2G007560
MF	GO:0016903	oxidoreductase activity, acting on the aldehyde or oxo group of donors	15/4335	20/8696	0.0199281	0.999026	CsaV3_6G013490/CsaV3_3G020110/CsaV3_6G008320/CsaV3_6G041570/CsaV3_6G036340/CsaV3_6G001210/CsaV3_1G009420/CsaV3_5G007980/CsaV3_2G014210/CsaV3_5G031990/CsaV3_6G014930/CsaV3_5G026370/CsaV3_5G014440/CsaV3_6G014940/CsaV3_7G022960	CsaV3_6G013490/CsaV3_3G020110/CsaV3_6G008320/CsaV3_6G041570/CsaV3_6G036340/CsaV3_6G001210/CsaV3_1G009420/CsaV3_5G007980/CsaV3_2G014210/CsaV3_5G031990/CsaV3_6G014930/CsaV3_5G026370/CsaV3_5G014440/CsaV3_6G014940/CsaV3_7G022960	15	5	CsaV3_6G013490/CsaV3_3G020110/CsaV3_6G041570/CsaV3_5G026370/CsaV3_7G022960	10	CsaV3_6G008320/CsaV3_6G036340/CsaV3_6G001210/CsaV3_1G009420/CsaV3_5G007980/CsaV3_2G014210/CsaV3_5G031990/CsaV3_6G014930/CsaV3_5G014440/CsaV3_6G014940
MF	GO:0003779	actin binding	17/4335	24/8696	0.0307449	0.999026	CsaV3_1G031760/CsaV3_4G011660/CsaV3_5G026390/CsaV3_4G024760/CsaV3_2G015980/CsaV3_3G022330/CsaV3_1G033580/CsaV3_4G029360/CsaV3_2G008570/CsaV3_1G004810/CsaV3_3G013000/CsaV3_3G009000/CsaV3_3G048010/CsaV3_6G016270/CsaV3_7G027820/CsaV3_1G041970/CsaV3_3G039310	CsaV3_1G031760/CsaV3_4G011660/CsaV3_5G026390/CsaV3_4G024760/CsaV3_2G015980/CsaV3_3G022330/CsaV3_1G033580/CsaV3_4G029360/CsaV3_2G008570/CsaV3_1G004810/CsaV3_3G013000/CsaV3_3G009000/CsaV3_3G048010/CsaV3_6G016270/CsaV3_7G027820/CsaV3_1G041970/CsaV3_3G039310	17	10	CsaV3_5G026390/CsaV3_2G015980/CsaV3_3G022330/CsaV3_1G033580/CsaV3_4G029360/CsaV3_3G009000/CsaV3_3G048010/CsaV3_6G016270/CsaV3_1G041970/CsaV3_3G039310	7	CsaV3_1G031760/CsaV3_4G011660/CsaV3_4G024760/CsaV3_2G008570/CsaV3_1G004810/CsaV3_3G013000/CsaV3_7G027820
MF	GO:0031072	heat shock protein binding	889640	13/8696	0.0449891	0.999026	CsaV3_4G008850/CsaV3_2G002680/CsaV3_5G035180/CsaV3_3G046470/CsaV3_2G030000/CsaV3_1G044020/CsaV3_7G031320/CsaV3_2G002870/CsaV3_6G006540/CsaV3_4G001970	CsaV3_4G008850/CsaV3_2G002680/CsaV3_5G035180/CsaV3_3G046470/CsaV3_2G030000/CsaV3_1G044020/CsaV3_7G031320/CsaV3_2G002870/CsaV3_6G006540/CsaV3_4G001970	10	5	CsaV3_2G002680/CsaV3_5G035180/CsaV3_3G046470/CsaV3_2G002870/CsaV3_6G006540	5	CsaV3_4G008850/CsaV3_2G030000/CsaV3_1G044020/CsaV3_7G031320/CsaV3_4G001970

## Sheet: XS_40vsXS_30DAP GO
Category	GOID	Description	GeneRatio	BgRatio	pvalue	padj	geneID	geneName	Count	Up	Up_Gene_id	Down	Down_Gene_id
BP	GO:0043604	amide biosynthetic process	160/2759	283/5804	0.00115562	0.213004	CsaV3_3G031360/CsaV3_4G007890/CsaV3_7G021830/CsaV3_1G009580/CsaV3_4G031980/CsaV3_4G005150/CsaV3_1G023010/CsaV3_1G039910/CsaV3_3G018830/CsaV3_6G022450/CsaV3_3G005110/CsaV3_3G035560/CsaV3_3G012980/CsaV3_5G031430/CsaV3_7G021070/CsaV3_5G013970/CsaV3_1G028950/CsaV3_5G008630/CsaV3_2G012470/CsaV3_3G007620/CsaV3_5G038460/CsaV3_7G026620/CsaV3_7G007910/CsaV3_3G039740/CsaV3_4G008470/novel.376/CsaV3_6G002260…	CsaV3_3G031360/CsaV3_4G007890/CsaV3_7G021830/CsaV3_1G009580/CsaV3_4G031980/CsaV3_4G005150/CsaV3_1G023010/CsaV3_1G039910/CsaV3_3G018830/CsaV3_6G022450/CsaV3_3G005110/CsaV3_3G035560/CsaV3_3G012980/CsaV3_5G031430/CsaV3_7G021070/CsaV3_5G013970/CsaV3_1G028950/CsaV3_5G008630/CsaV3_2G012470/CsaV3_3G007620/CsaV3_5G038460/CsaV3_7G026620/CsaV3_7G007910/CsaV3_3G039740/CsaV3_4G008470/-/CsaV3_6G002260/CsaV3_3…	160	45	CsaV3_7G021830/CsaV3_1G039910/CsaV3_3G018830/CsaV3_3G005110/CsaV3_5G013970/CsaV3_1G028950/CsaV3_7G026620/CsaV3_3G044840/CsaV3_6G041770/CsaV3_5G005900/CsaV3_4G003400/CsaV3_3G040630/CsaV3_2G011140/CsaV3_7G003720/CsaV3_3G028630/CsaV3_6G050190/CsaV3_4G000020/CsaV3_3G017730/CsaV3_4G001790/CsaV3_2G033280/CsaV3_5G001160/CsaV3_2G016200/CsaV3_4G034910/CsaV3_5G001490/CsaV3_5G001820/CsaV3_2G008470/CsaV3_4G0…	115	CsaV3_3G031360/CsaV3_4G007890/CsaV3_1G009580/CsaV3_4G031980/CsaV3_4G005150/CsaV3_1G023010/CsaV3_6G022450/CsaV3_3G035560/CsaV3_3G012980/CsaV3_5G031430/CsaV3_7G021070/CsaV3_5G008630/CsaV3_2G012470/CsaV3_3G007620/CsaV3_5G038460/CsaV3_7G007910/CsaV3_3G039740/CsaV3_4G008470/novel.376/CsaV3_6G002260/CsaV3_2G032240/CsaV3_4G036580/CsaV3_6G046990/CsaV3_6G007430/CsaV3_4G011770/CsaV3_6G032270/CsaV3_7G031330…
BP	GO:0006412	translation	152/2759	269/5804	0.0015724	0.213004	CsaV3_3G031360/CsaV3_4G007890/CsaV3_7G021830/CsaV3_1G009580/CsaV3_4G031980/CsaV3_4G005150/CsaV3_1G023010/CsaV3_1G039910/CsaV3_3G018830/CsaV3_6G022450/CsaV3_3G005110/CsaV3_3G035560/CsaV3_3G012980/CsaV3_5G031430/CsaV3_7G021070/CsaV3_5G013970/CsaV3_1G028950/CsaV3_2G012470/CsaV3_3G007620/CsaV3_5G038460/CsaV3_7G026620/CsaV3_7G007910/CsaV3_3G039740/CsaV3_4G008470/novel.376/CsaV3_6G002260/CsaV3_3G044840…	CsaV3_3G031360/CsaV3_4G007890/CsaV3_7G021830/CsaV3_1G009580/CsaV3_4G031980/CsaV3_4G005150/CsaV3_1G023010/CsaV3_1G039910/CsaV3_3G018830/CsaV3_6G022450/CsaV3_3G005110/CsaV3_3G035560/CsaV3_3G012980/CsaV3_5G031430/CsaV3_7G021070/CsaV3_5G013970/CsaV3_1G028950/CsaV3_2G012470/CsaV3_3G007620/CsaV3_5G038460/CsaV3_7G026620/CsaV3_7G007910/CsaV3_3G039740/CsaV3_4G008470/-/CsaV3_6G002260/CsaV3_3G044840/CsaV3_2…	152	43	CsaV3_7G021830/CsaV3_1G039910/CsaV3_3G018830/CsaV3_3G005110/CsaV3_5G013970/CsaV3_1G028950/CsaV3_7G026620/CsaV3_3G044840/CsaV3_6G041770/CsaV3_5G005900/CsaV3_4G003400/CsaV3_3G040630/CsaV3_2G011140/CsaV3_7G003720/CsaV3_3G028630/CsaV3_6G050190/CsaV3_4G000020/CsaV3_3G017730/CsaV3_4G001790/CsaV3_2G033280/CsaV3_5G001160/CsaV3_2G016200/CsaV3_4G034910/CsaV3_5G001490/CsaV3_5G001820/CsaV3_2G008470/CsaV3_4G0…	109	CsaV3_3G031360/CsaV3_4G007890/CsaV3_1G009580/CsaV3_4G031980/CsaV3_4G005150/CsaV3_1G023010/CsaV3_6G022450/CsaV3_3G035560/CsaV3_3G012980/CsaV3_5G031430/CsaV3_7G021070/CsaV3_2G012470/CsaV3_3G007620/CsaV3_5G038460/CsaV3_7G007910/CsaV3_3G039740/CsaV3_4G008470/novel.376/CsaV3_6G002260/CsaV3_2G032240/CsaV3_4G036580/CsaV3_6G046990/CsaV3_6G007430/CsaV3_4G011770/CsaV3_6G032270/CsaV3_7G031330/CsaV3_3G037470…
BP	GO:0043043	peptide biosynthetic process	153/2759	271/5804	0.00159433	0.213004	CsaV3_3G031360/CsaV3_4G007890/CsaV3_7G021830/CsaV3_1G009580/CsaV3_4G031980/CsaV3_4G005150/CsaV3_1G023010/CsaV3_1G039910/CsaV3_3G018830/CsaV3_6G022450/CsaV3_3G005110/CsaV3_3G035560/CsaV3_3G012980/CsaV3_5G031430/CsaV3_7G021070/CsaV3_5G013970/CsaV3_1G028950/CsaV3_2G012470/CsaV3_3G007620/CsaV3_5G038460/CsaV3_7G026620/CsaV3_7G007910/CsaV3_3G039740/CsaV3_4G008470/novel.376/CsaV3_6G002260/CsaV3_3G044840…	CsaV3_3G031360/CsaV3_4G007890/CsaV3_7G021830/CsaV3_1G009580/CsaV3_4G031980/CsaV3_4G005150/CsaV3_1G023010/CsaV3_1G039910/CsaV3_3G018830/CsaV3_6G022450/CsaV3_3G005110/CsaV3_3G035560/CsaV3_3G012980/CsaV3_5G031430/CsaV3_7G021070/CsaV3_5G013970/CsaV3_1G028950/CsaV3_2G012470/CsaV3_3G007620/CsaV3_5G038460/CsaV3_7G026620/CsaV3_7G007910/CsaV3_3G039740/CsaV3_4G008470/-/CsaV3_6G002260/CsaV3_3G044840/CsaV3_2…	153	43	CsaV3_7G021830/CsaV3_1G039910/CsaV3_3G018830/CsaV3_3G005110/CsaV3_5G013970/CsaV3_1G028950/CsaV3_7G026620/CsaV3_3G044840/CsaV3_6G041770/CsaV3_5G005900/CsaV3_4G003400/CsaV3_3G040630/CsaV3_2G011140/CsaV3_7G003720/CsaV3_3G028630/CsaV3_6G050190/CsaV3_4G000020/CsaV3_3G017730/CsaV3_4G001790/CsaV3_2G033280/CsaV3_5G001160/CsaV3_2G016200/CsaV3_4G034910/CsaV3_5G001490/CsaV3_5G001820/CsaV3_2G008470/CsaV3_4G0…	110	CsaV3_3G031360/CsaV3_4G007890/CsaV3_1G009580/CsaV3_4G031980/CsaV3_4G005150/CsaV3_1G023010/CsaV3_6G022450/CsaV3_3G035560/CsaV3_3G012980/CsaV3_5G031430/CsaV3_7G021070/CsaV3_2G012470/CsaV3_3G007620/CsaV3_5G038460/CsaV3_7G007910/CsaV3_3G039740/CsaV3_4G008470/novel.376/CsaV3_6G002260/CsaV3_2G032240/CsaV3_4G036580/CsaV3_6G046990/CsaV3_6G007430/CsaV3_4G011770/CsaV3_6G032270/CsaV3_7G031330/CsaV3_3G037470…
BP	GO:0006518	peptide metabolic process	156/2759	278/5804	0.00203345	0.213004	CsaV3_3G031360/CsaV3_4G007890/CsaV3_7G021830/CsaV3_1G009580/CsaV3_4G031980/CsaV3_4G005150/CsaV3_1G023010/CsaV3_1G039910/CsaV3_3G018830/CsaV3_6G022450/CsaV3_3G005110/CsaV3_3G035560/CsaV3_3G012980/CsaV3_5G031430/CsaV3_7G021070/CsaV3_5G013970/CsaV3_1G028950/CsaV3_2G012470/CsaV3_3G007620/CsaV3_5G038460/CsaV3_7G026620/CsaV3_7G007910/CsaV3_3G039740/CsaV3_4G008470/novel.376/CsaV3_6G002260/CsaV3_3G044840…	CsaV3_3G031360/CsaV3_4G007890/CsaV3_7G021830/CsaV3_1G009580/CsaV3_4G031980/CsaV3_4G005150/CsaV3_1G023010/CsaV3_1G039910/CsaV3_3G018830/CsaV3_6G022450/CsaV3_3G005110/CsaV3_3G035560/CsaV3_3G012980/CsaV3_5G031430/CsaV3_7G021070/CsaV3_5G013970/CsaV3_1G028950/CsaV3_2G012470/CsaV3_3G007620/CsaV3_5G038460/CsaV3_7G026620/CsaV3_7G007910/CsaV3_3G039740/CsaV3_4G008470/-/CsaV3_6G002260/CsaV3_3G044840/CsaV3_2…	156	43	CsaV3_7G021830/CsaV3_1G039910/CsaV3_3G018830/CsaV3_3G005110/CsaV3_5G013970/CsaV3_1G028950/CsaV3_7G026620/CsaV3_3G044840/CsaV3_6G041770/CsaV3_5G005900/CsaV3_4G003400/CsaV3_3G040630/CsaV3_2G011140/CsaV3_7G003720/CsaV3_3G028630/CsaV3_6G050190/CsaV3_4G000020/CsaV3_3G017730/CsaV3_4G001790/CsaV3_2G033280/CsaV3_5G001160/CsaV3_2G016200/CsaV3_4G034910/CsaV3_5G001490/CsaV3_5G001820/CsaV3_2G008470/CsaV3_4G0…	113	CsaV3_3G031360/CsaV3_4G007890/CsaV3_1G009580/CsaV3_4G031980/CsaV3_4G005150/CsaV3_1G023010/CsaV3_6G022450/CsaV3_3G035560/CsaV3_3G012980/CsaV3_5G031430/CsaV3_7G021070/CsaV3_2G012470/CsaV3_3G007620/CsaV3_5G038460/CsaV3_7G007910/CsaV3_3G039740/CsaV3_4G008470/novel.376/CsaV3_6G002260/CsaV3_2G032240/CsaV3_4G036580/CsaV3_6G046990/CsaV3_6G007430/CsaV3_4G011770/CsaV3_6G032270/CsaV3_7G031330/CsaV3_3G037470…
BP	GO:0043603	cellular amide metabolic process	164/2759	295/5804	0.00269071	0.225482	CsaV3_3G031360/CsaV3_4G007890/CsaV3_7G021830/CsaV3_1G009580/CsaV3_4G031980/CsaV3_4G005150/CsaV3_1G023010/CsaV3_1G039910/CsaV3_3G018830/CsaV3_6G022450/CsaV3_3G005110/CsaV3_3G035560/CsaV3_3G012980/CsaV3_5G031430/CsaV3_7G021070/CsaV3_5G013970/CsaV3_1G028950/CsaV3_5G008630/CsaV3_2G012470/CsaV3_3G007620/CsaV3_5G038460/CsaV3_7G026620/CsaV3_7G007910/CsaV3_3G039740/CsaV3_4G008470/novel.376/CsaV3_6G002260…	CsaV3_3G031360/CsaV3_4G007890/CsaV3_7G021830/CsaV3_1G009580/CsaV3_4G031980/CsaV3_4G005150/CsaV3_1G023010/CsaV3_1G039910/CsaV3_3G018830/CsaV3_6G022450/CsaV3_3G005110/CsaV3_3G035560/CsaV3_3G012980/CsaV3_5G031430/CsaV3_7G021070/CsaV3_5G013970/CsaV3_1G028950/CsaV3_5G008630/CsaV3_2G012470/CsaV3_3G007620/CsaV3_5G038460/CsaV3_7G026620/CsaV3_7G007910/CsaV3_3G039740/CsaV3_4G008470/-/CsaV3_6G002260/CsaV3_3…	164	45	CsaV3_7G021830/CsaV3_1G039910/CsaV3_3G018830/CsaV3_3G005110/CsaV3_5G013970/CsaV3_1G028950/CsaV3_7G026620/CsaV3_3G044840/CsaV3_6G041770/CsaV3_5G005900/CsaV3_4G003400/CsaV3_3G040630/CsaV3_2G011140/CsaV3_7G003720/CsaV3_3G028630/CsaV3_6G050190/CsaV3_4G000020/CsaV3_3G017730/CsaV3_4G001790/CsaV3_2G033280/CsaV3_5G001160/CsaV3_2G016200/CsaV3_4G034910/CsaV3_5G001490/CsaV3_5G001820/CsaV3_2G008470/CsaV3_4G0…	119	CsaV3_3G031360/CsaV3_4G007890/CsaV3_1G009580/CsaV3_4G031980/CsaV3_4G005150/CsaV3_1G023010/CsaV3_6G022450/CsaV3_3G035560/CsaV3_3G012980/CsaV3_5G031430/CsaV3_7G021070/CsaV3_5G008630/CsaV3_2G012470/CsaV3_3G007620/CsaV3_5G038460/CsaV3_7G007910/CsaV3_3G039740/CsaV3_4G008470/novel.376/CsaV3_6G002260/CsaV3_2G032240/CsaV3_4G036580/CsaV3_6G046990/CsaV3_6G007430/CsaV3_4G011770/CsaV3_6G032270/CsaV3_7G031330…
BP	GO:1901566	organonitrogen compound biosynthetic process	257/2759	483/5804	0.00525992	0.367318	CsaV3_1G036050/CsaV3_3G031360/CsaV3_3G033790/CsaV3_4G007890/CsaV3_1G000080/CsaV3_5G028680/CsaV3_7G021830/CsaV3_6G040120/CsaV3_7G018620/CsaV3_1G009580/CsaV3_6G053210/CsaV3_4G031980/CsaV3_4G005150/CsaV3_1G023010/CsaV3_3G021030/CsaV3_1G039910/CsaV3_1G003170/CsaV3_3G018830/CsaV3_6G049050/CsaV3_6G022450/CsaV3_1G038260/CsaV3_1G000670/CsaV3_2G030530/CsaV3_3G005110/CsaV3_3G035920/CsaV3_5G039400/CsaV3_3G0…	CsaV3_1G036050/CsaV3_3G031360/CsaV3_3G033790/CsaV3_4G007890/CsaV3_1G000080/CsaV3_5G028680/CsaV3_7G021830/CsaV3_6G040120/CsaV3_7G018620/CsaV3_1G009580/CsaV3_6G053210/CsaV3_4G031980/CsaV3_4G005150/CsaV3_1G023010/CsaV3_3G021030/CsaV3_1G039910/CsaV3_1G003170/CsaV3_3G018830/CsaV3_6G049050/CsaV3_6G022450/CsaV3_1G038260/CsaV3_1G000670/CsaV3_2G030530/CsaV3_3G005110/CsaV3_3G035920/CsaV3_5G039400/CsaV3_3G0…	257	92	CsaV3_3G033790/CsaV3_7G021830/CsaV3_6G040120/CsaV3_7G018620/CsaV3_1G039910/CsaV3_3G018830/CsaV3_1G038260/CsaV3_3G005110/CsaV3_5G039400/CsaV3_3G001560/CsaV3_3G023460/CsaV3_4G028630/CsaV3_4G008960/CsaV3_6G036360/CsaV3_4G004200/CsaV3_5G013970/CsaV3_1G028950/CsaV3_4G022060/CsaV3_3G013880/CsaV3_5G002830/CsaV3_7G026620/CsaV3_2G025670/CsaV3_3G044840/CsaV3_6G041770/CsaV3_5G005900/CsaV3_6G003290/CsaV3_6G0…	165	CsaV3_1G036050/CsaV3_3G031360/CsaV3_4G007890/CsaV3_1G000080/CsaV3_5G028680/CsaV3_1G009580/CsaV3_6G053210/CsaV3_4G031980/CsaV3_4G005150/CsaV3_1G023010/CsaV3_3G021030/CsaV3_1G003170/CsaV3_6G049050/CsaV3_6G022450/CsaV3_1G000670/CsaV3_2G030530/CsaV3_3G035920/CsaV3_3G035560/CsaV3_7G003550/CsaV3_3G012980/CsaV3_5G031430/CsaV3_3G041590/CsaV3_1G031480/CsaV3_7G021070/CsaV3_6G040390/CsaV3_5G035760/CsaV3_6G0…
BP	GO:0016053	organic acid biosynthetic process	69/2759	117/5804	0.00797289	0.416775	CsaV3_6G040120/CsaV3_7G018620/CsaV3_3G021030/CsaV3_6G006560/CsaV3_1G029420/CsaV3_3G017450/CsaV3_1G038260/CsaV3_5G003990/CsaV3_5G002520/CsaV3_1G000670/CsaV3_3G035920/CsaV3_3G023460/CsaV3_3G041590/CsaV3_4G008960/CsaV3_1G031480/CsaV3_6G036360/CsaV3_6G040390/CsaV3_4G004200/CsaV3_6G014760/CsaV3_5G008630/CsaV3_6G040430/CsaV3_2G015280/CsaV3_7G021470/CsaV3_6G048080/CsaV3_5G028690/CsaV3_4G024670/CsaV3_6G0…	CsaV3_6G040120/CsaV3_7G018620/CsaV3_3G021030/CsaV3_6G006560/CsaV3_1G029420/CsaV3_3G017450/CsaV3_1G038260/CsaV3_5G003990/CsaV3_5G002520/CsaV3_1G000670/CsaV3_3G035920/CsaV3_3G023460/CsaV3_3G041590/CsaV3_4G008960/CsaV3_1G031480/CsaV3_6G036360/CsaV3_6G040390/CsaV3_4G004200/CsaV3_6G014760/CsaV3_5G008630/CsaV3_6G040430/CsaV3_2G015280/CsaV3_7G021470/CsaV3_6G048080/CsaV3_5G028690/CsaV3_4G024670/CsaV3_6G0…	69	32	CsaV3_6G040120/CsaV3_7G018620/CsaV3_1G029420/CsaV3_3G017450/CsaV3_1G038260/CsaV3_5G003990/CsaV3_3G023460/CsaV3_4G008960/CsaV3_6G036360/CsaV3_4G004200/CsaV3_6G048080/CsaV3_5G028690/CsaV3_4G024670/CsaV3_4G025950/CsaV3_2G007090/CsaV3_6G048980/CsaV3_1G009560/CsaV3_7G005980/CsaV3_7G022530/CsaV3_4G000040/CsaV3_6G013500/CsaV3_2G028690/CsaV3_1G014500/CsaV3_3G043140/CsaV3_2G003300/CsaV3_6G045310/CsaV3_5G0…	37	CsaV3_3G021030/CsaV3_6G006560/CsaV3_5G002520/CsaV3_1G000670/CsaV3_3G035920/CsaV3_3G041590/CsaV3_1G031480/CsaV3_6G040390/CsaV3_6G014760/CsaV3_5G008630/CsaV3_6G040430/CsaV3_2G015280/CsaV3_7G021470/CsaV3_6G040340/CsaV3_1G033910/CsaV3_6G052510/CsaV3_3G021690/CsaV3_5G023610/CsaV3_3G003250/CsaV3_3G016820/CsaV3_4G036210/CsaV3_1G042270/CsaV3_5G014440/CsaV3_6G016090/CsaV3_1G046070/CsaV3_4G037690/CsaV3_3G0…
BP	GO:0046394	carboxylic acid biosynthetic process	69/2759	117/5804	0.00797289	0.416775	CsaV3_6G040120/CsaV3_7G018620/CsaV3_3G021030/CsaV3_6G006560/CsaV3_1G029420/CsaV3_3G017450/CsaV3_1G038260/CsaV3_5G003990/CsaV3_5G002520/CsaV3_1G000670/CsaV3_3G035920/CsaV3_3G023460/CsaV3_3G041590/CsaV3_4G008960/CsaV3_1G031480/CsaV3_6G036360/CsaV3_6G040390/CsaV3_4G004200/CsaV3_6G014760/CsaV3_5G008630/CsaV3_6G040430/CsaV3_2G015280/CsaV3_7G021470/CsaV3_6G048080/CsaV3_5G028690/CsaV3_4G024670/CsaV3_6G0…	CsaV3_6G040120/CsaV3_7G018620/CsaV3_3G021030/CsaV3_6G006560/CsaV3_1G029420/CsaV3_3G017450/CsaV3_1G038260/CsaV3_5G003990/CsaV3_5G002520/CsaV3_1G000670/CsaV3_3G035920/CsaV3_3G023460/CsaV3_3G041590/CsaV3_4G008960/CsaV3_1G031480/CsaV3_6G036360/CsaV3_6G040390/CsaV3_4G004200/CsaV3_6G014760/CsaV3_5G008630/CsaV3_6G040430/CsaV3_2G015280/CsaV3_7G021470/CsaV3_6G048080/CsaV3_5G028690/CsaV3_4G024670/CsaV3_6G0…	69	32	CsaV3_6G040120/CsaV3_7G018620/CsaV3_1G029420/CsaV3_3G017450/CsaV3_1G038260/CsaV3_5G003990/CsaV3_3G023460/CsaV3_4G008960/CsaV3_6G036360/CsaV3_4G004200/CsaV3_6G048080/CsaV3_5G028690/CsaV3_4G024670/CsaV3_4G025950/CsaV3_2G007090/CsaV3_6G048980/CsaV3_1G009560/CsaV3_7G005980/CsaV3_7G022530/CsaV3_4G000040/CsaV3_6G013500/CsaV3_2G028690/CsaV3_1G014500/CsaV3_3G043140/CsaV3_2G003300/CsaV3_6G045310/CsaV3_5G0…	37	CsaV3_3G021030/CsaV3_6G006560/CsaV3_5G002520/CsaV3_1G000670/CsaV3_3G035920/CsaV3_3G041590/CsaV3_1G031480/CsaV3_6G040390/CsaV3_6G014760/CsaV3_5G008630/CsaV3_6G040430/CsaV3_2G015280/CsaV3_7G021470/CsaV3_6G040340/CsaV3_1G033910/CsaV3_6G052510/CsaV3_3G021690/CsaV3_5G023610/CsaV3_3G003250/CsaV3_3G016820/CsaV3_4G036210/CsaV3_1G042270/CsaV3_5G014440/CsaV3_6G016090/CsaV3_1G046070/CsaV3_4G037690/CsaV3_3G0…
BP	GO:0015698	inorganic anion transport	17/2759	23/5804	0.00933223	0.416775	CsaV3_7G027830/CsaV3_7G033120/CsaV3_2G003210/CsaV3_1G030670/CsaV3_6G043870/CsaV3_7G032820/CsaV3_3G006610/CsaV3_2G031590/CsaV3_6G052220/CsaV3_5G026240/CsaV3_1G030710/CsaV3_5G000350/CsaV3_UNG188490/CsaV3_5G013270/CsaV3_4G004820/CsaV3_6G009920/CsaV3_3G003830	CsaV3_7G027830/CsaV3_7G033120/CsaV3_2G003210/CsaV3_1G030670/CsaV3_6G043870/CsaV3_7G032820/CsaV3_3G006610/CsaV3_2G031590/CsaV3_6G052220/CsaV3_5G026240/CsaV3_1G030710/CsaV3_5G000350/CsaV3_UNG188490/CsaV3_5G013270/CsaV3_4G004820/CsaV3_6G009920/CsaV3_3G003830	17	9	CsaV3_7G033120/CsaV3_6G043870/CsaV3_3G006610/CsaV3_2G031590/CsaV3_6G052220/CsaV3_5G026240/CsaV3_UNG188490/CsaV3_4G004820/CsaV3_3G003830	8	CsaV3_7G027830/CsaV3_2G003210/CsaV3_1G030670/CsaV3_7G032820/CsaV3_1G030710/CsaV3_5G000350/CsaV3_5G013270/CsaV3_6G009920
BP	GO:0032787	monocarboxylic acid metabolic process	51/2759	84/5804	0.0099469	0.416775	CsaV3_3G019500/CsaV3_2G002170/CsaV3_7G010240/CsaV3_6G006560/CsaV3_1G029420/CsaV3_3G017450/CsaV3_5G003990/CsaV3_5G002520/CsaV3_2G025420/CsaV3_3G035920/CsaV3_3G023460/CsaV3_4G008960/CsaV3_6G040390/CsaV3_4G004200/CsaV3_2G034560/CsaV3_6G040430/CsaV3_2G015280/CsaV3_7G021470/CsaV3_6G048080/CsaV3_1G009520/CsaV3_5G028690/CsaV3_6G040340/CsaV3_4G025950/CsaV3_1G033910/CsaV3_6G052510/CsaV3_6G030990/CsaV3_2G0…	CsaV3_3G019500/CsaV3_2G002170/CsaV3_7G010240/CsaV3_6G006560/CsaV3_1G029420/CsaV3_3G017450/CsaV3_5G003990/CsaV3_5G002520/CsaV3_2G025420/CsaV3_3G035920/CsaV3_3G023460/CsaV3_4G008960/CsaV3_6G040390/CsaV3_4G004200/CsaV3_2G034560/CsaV3_6G040430/CsaV3_2G015280/CsaV3_7G021470/CsaV3_6G048080/CsaV3_1G009520/CsaV3_5G028690/CsaV3_6G040340/CsaV3_4G025950/CsaV3_1G033910/CsaV3_6G052510/CsaV3_6G030990/CsaV3_2G0…	51	23	CsaV3_3G019500/CsaV3_2G002170/CsaV3_7G010240/CsaV3_1G029420/CsaV3_3G017450/CsaV3_5G003990/CsaV3_2G025420/CsaV3_3G023460/CsaV3_4G008960/CsaV3_4G004200/CsaV3_6G048080/CsaV3_5G028690/CsaV3_4G025950/CsaV3_4G000040/CsaV3_6G024070/CsaV3_6G013500/CsaV3_6G023910/CsaV3_2G028690/CsaV3_3G043140/CsaV3_6G045440/CsaV3_1G039980/CsaV3_2G030420/CsaV3_3G007660	28	CsaV3_6G006560/CsaV3_5G002520/CsaV3_3G035920/CsaV3_6G040390/CsaV3_2G034560/CsaV3_6G040430/CsaV3_2G015280/CsaV3_7G021470/CsaV3_1G009520/CsaV3_6G040340/CsaV3_1G033910/CsaV3_6G052510/CsaV3_6G030990/CsaV3_2G014440/CsaV3_5G023610/CsaV3_3G003250/CsaV3_4G036210/CsaV3_6G016090/CsaV3_1G046070/CsaV3_4G037690/CsaV3_3G010290/CsaV3_1G031130/CsaV3_7G025860/CsaV3_3G010310/CsaV3_6G040330/CsaV3_3G010300/CsaV3_6G0…
BP	GO:0019752	carboxylic acid metabolic process	120/2759	218/5804	0.0141527	0.440535	CsaV3_3G019500/CsaV3_4G013270/CsaV3_2G002170/CsaV3_7G010240/CsaV3_6G040120/CsaV3_7G018620/CsaV3_3G021030/CsaV3_1G039910/CsaV3_4G030380/CsaV3_3G044050/CsaV3_3G018830/CsaV3_6G006560/CsaV3_1G029420/CsaV3_3G017450/CsaV3_1G038260/CsaV3_5G003990/CsaV3_5G002520/CsaV3_2G025420/CsaV3_1G000670/CsaV3_3G035920/CsaV3_3G023460/CsaV3_3G041590/CsaV3_4G008960/CsaV3_1G031480/CsaV3_6G036360/CsaV3_6G040390/CsaV3_4G0…	CsaV3_3G019500/CsaV3_4G013270/CsaV3_2G002170/CsaV3_7G010240/CsaV3_6G040120/CsaV3_7G018620/CsaV3_3G021030/CsaV3_1G039910/CsaV3_4G030380/CsaV3_3G044050/CsaV3_3G018830/CsaV3_6G006560/CsaV3_1G029420/CsaV3_3G017450/CsaV3_1G038260/CsaV3_5G003990/CsaV3_5G002520/CsaV3_2G025420/CsaV3_1G000670/CsaV3_3G035920/CsaV3_3G023460/CsaV3_3G041590/CsaV3_4G008960/CsaV3_1G031480/CsaV3_6G036360/CsaV3_6G040390/CsaV3_4G0…	120	65	CsaV3_3G019500/CsaV3_4G013270/CsaV3_2G002170/CsaV3_7G010240/CsaV3_6G040120/CsaV3_7G018620/CsaV3_1G039910/CsaV3_3G044050/CsaV3_3G018830/CsaV3_1G029420/CsaV3_3G017450/CsaV3_1G038260/CsaV3_5G003990/CsaV3_2G025420/CsaV3_3G023460/CsaV3_4G008960/CsaV3_6G036360/CsaV3_4G004200/CsaV3_5G013970/CsaV3_2G013730/CsaV3_7G026620/CsaV3_4G001010/CsaV3_5G005900/CsaV3_7G005670/CsaV3_6G048080/CsaV3_4G003400/CsaV3_2G0…	55	CsaV3_3G021030/CsaV3_4G030380/CsaV3_6G006560/CsaV3_5G002520/CsaV3_1G000670/CsaV3_3G035920/CsaV3_3G041590/CsaV3_1G031480/CsaV3_6G040390/CsaV3_6G014760/CsaV3_5G008630/CsaV3_2G034560/CsaV3_6G040430/CsaV3_2G015280/CsaV3_7G021470/CsaV3_1G009520/CsaV3_6G005330/CsaV3_6G040340/CsaV3_1G033910/CsaV3_2G003740/CsaV3_6G052510/CsaV3_5G005130/CsaV3_6G030990/CsaV3_3G021690/CsaV3_2G014440/CsaV3_1G036910/CsaV3_5G0…
BP	GO:0072330	monocarboxylic acid biosynthetic process	40/2759	65/5804	0.015741	0.440535	CsaV3_6G006560/CsaV3_1G029420/CsaV3_3G017450/CsaV3_5G003990/CsaV3_5G002520/CsaV3_3G035920/CsaV3_3G023460/CsaV3_4G008960/CsaV3_6G040390/CsaV3_4G004200/CsaV3_6G040430/CsaV3_2G015280/CsaV3_7G021470/CsaV3_6G048080/CsaV3_5G028690/CsaV3_6G040340/CsaV3_4G025950/CsaV3_1G033910/CsaV3_6G052510/CsaV3_5G023610/CsaV3_3G003250/CsaV3_4G036210/CsaV3_4G000040/CsaV3_6G013500/CsaV3_6G016090/CsaV3_1G046070/CsaV3_4G0…	CsaV3_6G006560/CsaV3_1G029420/CsaV3_3G017450/CsaV3_5G003990/CsaV3_5G002520/CsaV3_3G035920/CsaV3_3G023460/CsaV3_4G008960/CsaV3_6G040390/CsaV3_4G004200/CsaV3_6G040430/CsaV3_2G015280/CsaV3_7G021470/CsaV3_6G048080/CsaV3_5G028690/CsaV3_6G040340/CsaV3_4G025950/CsaV3_1G033910/CsaV3_6G052510/CsaV3_5G023610/CsaV3_3G003250/CsaV3_4G036210/CsaV3_4G000040/CsaV3_6G013500/CsaV3_6G016090/CsaV3_1G046070/CsaV3_4G0…	40	17	CsaV3_1G029420/CsaV3_3G017450/CsaV3_5G003990/CsaV3_3G023460/CsaV3_4G008960/CsaV3_4G004200/CsaV3_6G048080/CsaV3_5G028690/CsaV3_4G025950/CsaV3_4G000040/CsaV3_6G013500/CsaV3_2G028690/CsaV3_3G043140/CsaV3_6G045440/CsaV3_1G039980/CsaV3_2G030420/CsaV3_3G007660	23	CsaV3_6G006560/CsaV3_5G002520/CsaV3_3G035920/CsaV3_6G040390/CsaV3_6G040430/CsaV3_2G015280/CsaV3_7G021470/CsaV3_6G040340/CsaV3_1G033910/CsaV3_6G052510/CsaV3_5G023610/CsaV3_3G003250/CsaV3_4G036210/CsaV3_6G016090/CsaV3_1G046070/CsaV3_4G037690/CsaV3_3G010290/CsaV3_1G031130/CsaV3_7G025860/CsaV3_3G010310/CsaV3_6G040330/CsaV3_3G010300/CsaV3_5G032610
BP	GO:0006090	pyruvate metabolic process	20/2759	29/5804	0.0161277	0.440535	CsaV3_7G010240/CsaV3_3G035920/CsaV3_3G023460/CsaV3_4G008960/CsaV3_6G040390/CsaV3_4G004200/CsaV3_6G040430/CsaV3_2G015280/CsaV3_7G021470/CsaV3_6G048080/CsaV3_5G028690/CsaV3_6G040340/CsaV3_2G014440/CsaV3_4G000040/CsaV3_6G013500/CsaV3_1G046070/CsaV3_4G037690/CsaV3_6G040330/CsaV3_1G039980/CsaV3_2G030420	CsaV3_7G010240/CsaV3_3G035920/CsaV3_3G023460/CsaV3_4G008960/CsaV3_6G040390/CsaV3_4G004200/CsaV3_6G040430/CsaV3_2G015280/CsaV3_7G021470/CsaV3_6G048080/CsaV3_5G028690/CsaV3_6G040340/CsaV3_2G014440/CsaV3_4G000040/CsaV3_6G013500/CsaV3_1G046070/CsaV3_4G037690/CsaV3_6G040330/CsaV3_1G039980/CsaV3_2G030420	20	10	CsaV3_7G010240/CsaV3_3G023460/CsaV3_4G008960/CsaV3_4G004200/CsaV3_6G048080/CsaV3_5G028690/CsaV3_4G000040/CsaV3_6G013500/CsaV3_1G039980/CsaV3_2G030420	10	CsaV3_3G035920/CsaV3_6G040390/CsaV3_6G040430/CsaV3_2G015280/CsaV3_7G021470/CsaV3_6G040340/CsaV3_2G014440/CsaV3_1G046070/CsaV3_4G037690/CsaV3_6G040330
BP	GO:0043436	oxoacid metabolic process	122/2759	224/5804	0.0202646	0.440535	CsaV3_3G019500/CsaV3_4G013270/CsaV3_2G002170/CsaV3_7G010240/CsaV3_6G040120/CsaV3_7G018620/CsaV3_3G021030/CsaV3_1G039910/CsaV3_4G030380/CsaV3_3G044050/CsaV3_3G018830/CsaV3_6G006560/CsaV3_1G029420/CsaV3_3G017450/CsaV3_1G038260/CsaV3_5G003990/CsaV3_5G002520/CsaV3_2G025420/CsaV3_1G000670/CsaV3_3G035920/CsaV3_3G023460/CsaV3_3G041590/CsaV3_4G008960/CsaV3_1G031480/CsaV3_6G036360/CsaV3_6G040390/CsaV3_4G0…	CsaV3_3G019500/CsaV3_4G013270/CsaV3_2G002170/CsaV3_7G010240/CsaV3_6G040120/CsaV3_7G018620/CsaV3_3G021030/CsaV3_1G039910/CsaV3_4G030380/CsaV3_3G044050/CsaV3_3G018830/CsaV3_6G006560/CsaV3_1G029420/CsaV3_3G017450/CsaV3_1G038260/CsaV3_5G003990/CsaV3_5G002520/CsaV3_2G025420/CsaV3_1G000670/CsaV3_3G035920/CsaV3_3G023460/CsaV3_3G041590/CsaV3_4G008960/CsaV3_1G031480/CsaV3_6G036360/CsaV3_6G040390/CsaV3_4G0…	122	66	CsaV3_3G019500/CsaV3_4G013270/CsaV3_2G002170/CsaV3_7G010240/CsaV3_6G040120/CsaV3_7G018620/CsaV3_1G039910/CsaV3_3G044050/CsaV3_3G018830/CsaV3_1G029420/CsaV3_3G017450/CsaV3_1G038260/CsaV3_5G003990/CsaV3_2G025420/CsaV3_3G023460/CsaV3_4G008960/CsaV3_6G036360/CsaV3_4G004200/CsaV3_5G013970/CsaV3_2G013730/CsaV3_7G026620/CsaV3_4G001010/CsaV3_5G005900/CsaV3_7G005670/CsaV3_6G048080/CsaV3_4G003400/CsaV3_2G0…	56	CsaV3_3G021030/CsaV3_4G030380/CsaV3_6G006560/CsaV3_5G002520/CsaV3_1G000670/CsaV3_3G035920/CsaV3_3G041590/CsaV3_1G031480/CsaV3_6G040390/CsaV3_6G014760/CsaV3_5G008630/CsaV3_2G034560/CsaV3_6G040430/CsaV3_2G015280/CsaV3_7G021470/CsaV3_1G009520/CsaV3_6G005330/CsaV3_6G040340/CsaV3_1G033910/CsaV3_2G003740/CsaV3_6G052510/CsaV3_5G005130/CsaV3_6G030990/CsaV3_3G021690/CsaV3_2G014440/CsaV3_1G036910/CsaV3_5G0…
BP	GO:0006081	cellular aldehyde metabolic process	313988	1426213	0.0223438	0.440535	CsaV3_3G033790/CsaV3_7G010240/CsaV3_5G028490/CsaV3_5G034910/CsaV3_1G009520/CsaV3_1G037750/CsaV3_2G014440/CsaV3_6G013840/CsaV3_2G004240	CsaV3_3G033790/CsaV3_7G010240/CsaV3_5G028490/CsaV3_5G034910/CsaV3_1G009520/CsaV3_1G037750/CsaV3_2G014440/CsaV3_6G013840/CsaV3_2G004240	9	3	CsaV3_3G033790/CsaV3_7G010240/CsaV3_5G028490	6	CsaV3_5G034910/CsaV3_1G009520/CsaV3_1G037750/CsaV3_2G014440/CsaV3_6G013840/CsaV3_2G004240
BP	GO:0006082	organic acid metabolic process	122/2759	225/5804	0.0238949	0.440535	CsaV3_3G019500/CsaV3_4G013270/CsaV3_2G002170/CsaV3_7G010240/CsaV3_6G040120/CsaV3_7G018620/CsaV3_3G021030/CsaV3_1G039910/CsaV3_4G030380/CsaV3_3G044050/CsaV3_3G018830/CsaV3_6G006560/CsaV3_1G029420/CsaV3_3G017450/CsaV3_1G038260/CsaV3_5G003990/CsaV3_5G002520/CsaV3_2G025420/CsaV3_1G000670/CsaV3_3G035920/CsaV3_3G023460/CsaV3_3G041590/CsaV3_4G008960/CsaV3_1G031480/CsaV3_6G036360/CsaV3_6G040390/CsaV3_4G0…	CsaV3_3G019500/CsaV3_4G013270/CsaV3_2G002170/CsaV3_7G010240/CsaV3_6G040120/CsaV3_7G018620/CsaV3_3G021030/CsaV3_1G039910/CsaV3_4G030380/CsaV3_3G044050/CsaV3_3G018830/CsaV3_6G006560/CsaV3_1G029420/CsaV3_3G017450/CsaV3_1G038260/CsaV3_5G003990/CsaV3_5G002520/CsaV3_2G025420/CsaV3_1G000670/CsaV3_3G035920/CsaV3_3G023460/CsaV3_3G041590/CsaV3_4G008960/CsaV3_1G031480/CsaV3_6G036360/CsaV3_6G040390/CsaV3_4G0…	122	66	CsaV3_3G019500/CsaV3_4G013270/CsaV3_2G002170/CsaV3_7G010240/CsaV3_6G040120/CsaV3_7G018620/CsaV3_1G039910/CsaV3_3G044050/CsaV3_3G018830/CsaV3_1G029420/CsaV3_3G017450/CsaV3_1G038260/CsaV3_5G003990/CsaV3_2G025420/CsaV3_3G023460/CsaV3_4G008960/CsaV3_6G036360/CsaV3_4G004200/CsaV3_5G013970/CsaV3_2G013730/CsaV3_7G026620/CsaV3_4G001010/CsaV3_5G005900/CsaV3_7G005670/CsaV3_6G048080/CsaV3_4G003400/CsaV3_2G0…	56	CsaV3_3G021030/CsaV3_4G030380/CsaV3_6G006560/CsaV3_5G002520/CsaV3_1G000670/CsaV3_3G035920/CsaV3_3G041590/CsaV3_1G031480/CsaV3_6G040390/CsaV3_6G014760/CsaV3_5G008630/CsaV3_2G034560/CsaV3_6G040430/CsaV3_2G015280/CsaV3_7G021470/CsaV3_1G009520/CsaV3_6G005330/CsaV3_6G040340/CsaV3_1G033910/CsaV3_2G003740/CsaV3_6G052510/CsaV3_5G005130/CsaV3_6G030990/CsaV3_3G021690/CsaV3_2G014440/CsaV3_1G036910/CsaV3_5G0…
BP	GO:0030163	protein catabolic process	30/2759	48/5804	0.026059	0.440535	CsaV3_3G041900/CsaV3_6G006240/CsaV3_5G037190/CsaV3_2G031230/CsaV3_3G002450/CsaV3_2G028900/CsaV3_5G036070/CsaV3_3G013100/CsaV3_6G017300/CsaV3_6G001760/novel.211/CsaV3_1G032400/CsaV3_2G024370/CsaV3_3G000690/CsaV3_1G006510/CsaV3_6G007200/CsaV3_3G000620/CsaV3_4G025500/CsaV3_3G019900/CsaV3_7G001120/CsaV3_4G031710/CsaV3_3G041070/CsaV3_7G025230/CsaV3_3G009670/CsaV3_7G003400/CsaV3_1G046270/CsaV3_6G034220…	CsaV3_3G041900/CsaV3_6G006240/CsaV3_5G037190/CsaV3_2G031230/CsaV3_3G002450/CsaV3_2G028900/CsaV3_5G036070/CsaV3_3G013100/CsaV3_6G017300/CsaV3_6G001760/-/CsaV3_1G032400/CsaV3_2G024370/CsaV3_3G000690/CsaV3_1G006510/CsaV3_6G007200/CsaV3_3G000620/CsaV3_4G025500/CsaV3_3G019900/CsaV3_7G001120/CsaV3_4G031710/CsaV3_3G041070/CsaV3_7G025230/CsaV3_3G009670/CsaV3_7G003400/CsaV3_1G046270/CsaV3_6G034220/CsaV3_5…	30	25	CsaV3_3G041900/CsaV3_6G006240/CsaV3_5G037190/CsaV3_2G031230/CsaV3_3G002450/CsaV3_2G028900/CsaV3_3G013100/CsaV3_6G017300/novel.211/CsaV3_1G032400/CsaV3_3G000690/CsaV3_1G006510/CsaV3_3G000620/CsaV3_4G025500/CsaV3_7G001120/CsaV3_4G031710/CsaV3_3G041070/CsaV3_7G025230/CsaV3_3G009670/CsaV3_7G003400/CsaV3_1G046270/CsaV3_6G034220/CsaV3_5G001180/CsaV3_3G041550/CsaV3_3G017700	5	CsaV3_5G036070/CsaV3_6G001760/CsaV3_2G024370/CsaV3_6G007200/CsaV3_3G019900
BP	GO:0008104	protein localization	67/2759	118/5804	0.026321	0.440535	CsaV3_6G003390/CsaV3_2G025100/CsaV3_6G040720/CsaV3_3G019110/CsaV3_6G002880/CsaV3_1G034030/CsaV3_6G048860/CsaV3_6G013060/CsaV3_2G015650/CsaV3_UNG052420/CsaV3_4G006570/CsaV3_6G036710/CsaV3_1G043340/CsaV3_2G012310/CsaV3_2G006860/CsaV3_3G004800/CsaV3_3G041240/CsaV3_2G007560/CsaV3_2G007540/CsaV3_1G037990/CsaV3_3G033250/CsaV3_2G012420/CsaV3_5G000380/CsaV3_6G037090/CsaV3_4G008230/CsaV3_1G030500/CsaV3_3G…	CsaV3_6G003390/CsaV3_2G025100/CsaV3_6G040720/CsaV3_3G019110/CsaV3_6G002880/CsaV3_1G034030/CsaV3_6G048860/CsaV3_6G013060/CsaV3_2G015650/CsaV3_UNG052420/CsaV3_4G006570/CsaV3_6G036710/CsaV3_1G043340/CsaV3_2G012310/CsaV3_2G006860/CsaV3_3G004800/CsaV3_3G041240/CsaV3_2G007560/CsaV3_2G007540/CsaV3_1G037990/CsaV3_3G033250/CsaV3_2G012420/CsaV3_5G000380/CsaV3_6G037090/CsaV3_4G008230/CsaV3_1G030500/CsaV3_3G…	67	52	CsaV3_6G003390/CsaV3_2G025100/CsaV3_3G019110/CsaV3_6G002880/CsaV3_1G034030/CsaV3_6G013060/CsaV3_UNG052420/CsaV3_4G006570/CsaV3_6G036710/CsaV3_1G043340/CsaV3_2G012310/CsaV3_3G004800/CsaV3_3G041240/CsaV3_2G007560/CsaV3_2G007540/CsaV3_1G037990/CsaV3_3G033250/CsaV3_6G037090/CsaV3_4G008230/CsaV3_1G030500/CsaV3_3G026240/CsaV3_3G015830/CsaV3_2G014650/CsaV3_7G033100/CsaV3_1G014360/CsaV3_3G029980/CsaV3_7G…	15	CsaV3_6G040720/CsaV3_6G048860/CsaV3_2G015650/CsaV3_2G006860/CsaV3_2G012420/CsaV3_5G000380/CsaV3_2G016250/CsaV3_4G026140/CsaV3_5G000410/CsaV3_3G045990/CsaV3_6G031210/CsaV3_5G008320/CsaV3_6G006480/CsaV3_3G020580/CsaV3_3G007340
BP	GO:0072524	pyridine-containing compound metabolic process	26/2759	41/5804	0.0294211	0.440535	CsaV3_3G033790/CsaV3_3G035920/CsaV3_3G023460/CsaV3_5G028490/CsaV3_4G008960/CsaV3_6G040390/CsaV3_4G004200/CsaV3_6G040430/CsaV3_2G015280/CsaV3_5G034910/CsaV3_7G021470/CsaV3_6G048080/CsaV3_1G037750/CsaV3_5G028690/CsaV3_6G040340/CsaV3_1G008930/CsaV3_4G000040/CsaV3_6G013500/CsaV3_6G013840/CsaV3_1G046070/CsaV3_4G037690/CsaV3_2G004240/CsaV3_1G042920/CsaV3_6G040330/CsaV3_1G039980/CsaV3_2G030420	CsaV3_3G033790/CsaV3_3G035920/CsaV3_3G023460/CsaV3_5G028490/CsaV3_4G008960/CsaV3_6G040390/CsaV3_4G004200/CsaV3_6G040430/CsaV3_2G015280/CsaV3_5G034910/CsaV3_7G021470/CsaV3_6G048080/CsaV3_1G037750/CsaV3_5G028690/CsaV3_6G040340/CsaV3_1G008930/CsaV3_4G000040/CsaV3_6G013500/CsaV3_6G013840/CsaV3_1G046070/CsaV3_4G037690/CsaV3_2G004240/CsaV3_1G042920/CsaV3_6G040330/CsaV3_1G039980/CsaV3_2G030420	26	12	CsaV3_3G033790/CsaV3_3G023460/CsaV3_5G028490/CsaV3_4G008960/CsaV3_4G004200/CsaV3_6G048080/CsaV3_5G028690/CsaV3_1G008930/CsaV3_4G000040/CsaV3_6G013500/CsaV3_1G039980/CsaV3_2G030420	14	CsaV3_3G035920/CsaV3_6G040390/CsaV3_6G040430/CsaV3_2G015280/CsaV3_5G034910/CsaV3_7G021470/CsaV3_1G037750/CsaV3_6G040340/CsaV3_6G013840/CsaV3_1G046070/CsaV3_4G037690/CsaV3_2G004240/CsaV3_1G042920/CsaV3_6G040330
BP	GO:0016569	covalent chromatin modification	314018	13/5804	0.0311715	0.440535	CsaV3_1G005900/CsaV3_3G011580/CsaV3_4G031740/CsaV3_3G027790/CsaV3_7G035280/CsaV3_6G042640/CsaV3_3G002320/CsaV3_6G007420/CsaV3_3G000040/CsaV3_3G040650	CsaV3_1G005900/CsaV3_3G011580/CsaV3_4G031740/CsaV3_3G027790/CsaV3_7G035280/CsaV3_6G042640/CsaV3_3G002320/CsaV3_6G007420/CsaV3_3G000040/CsaV3_3G040650	10	6	CsaV3_1G005900/CsaV3_4G031740/CsaV3_7G035280/CsaV3_6G042640/CsaV3_3G002320/CsaV3_6G007420	4	CsaV3_3G011580/CsaV3_3G027790/CsaV3_3G000040/CsaV3_3G040650
BP	GO:0016570	histone modification	314018	13/5804	0.0311715	0.440535	CsaV3_1G005900/CsaV3_3G011580/CsaV3_4G031740/CsaV3_3G027790/CsaV3_7G035280/CsaV3_6G042640/CsaV3_3G002320/CsaV3_6G007420/CsaV3_3G000040/CsaV3_3G040650	CsaV3_1G005900/CsaV3_3G011580/CsaV3_4G031740/CsaV3_3G027790/CsaV3_7G035280/CsaV3_6G042640/CsaV3_3G002320/CsaV3_6G007420/CsaV3_3G000040/CsaV3_3G040650	10	6	CsaV3_1G005900/CsaV3_4G031740/CsaV3_7G035280/CsaV3_6G042640/CsaV3_3G002320/CsaV3_6G007420	4	CsaV3_3G011580/CsaV3_3G027790/CsaV3_3G000040/CsaV3_3G040650
BP	GO:0051246	regulation of protein metabolic process	314018	13/5804	0.0311715	0.440535	CsaV3_6G006470/CsaV3_7G028110/CsaV3_6G006240/CsaV3_1G028950/CsaV3_4G036580/CsaV3_5G005730/CsaV3_6G003670/CsaV3_7G001120/CsaV3_4G004350/CsaV3_2G035200	CsaV3_6G006470/CsaV3_7G028110/CsaV3_6G006240/CsaV3_1G028950/CsaV3_4G036580/CsaV3_5G005730/CsaV3_6G003670/CsaV3_7G001120/CsaV3_4G004350/CsaV3_2G035200	10	4	CsaV3_6G006240/CsaV3_1G028950/CsaV3_5G005730/CsaV3_7G001120	6	CsaV3_6G006470/CsaV3_7G028110/CsaV3_4G036580/CsaV3_6G003670/CsaV3_4G004350/CsaV3_2G035200
BP	GO:0033036	macromolecule localization	70/2759	125/5804	0.0340405	0.440535	CsaV3_6G003390/CsaV3_2G025100/CsaV3_6G040720/CsaV3_3G019110/CsaV3_6G002880/CsaV3_1G034030/CsaV3_6G048860/CsaV3_6G013060/CsaV3_2G015650/CsaV3_UNG052420/CsaV3_4G006570/CsaV3_6G036710/CsaV3_1G043340/CsaV3_2G012310/CsaV3_5G034220/CsaV3_2G006860/CsaV3_3G004800/CsaV3_3G041240/CsaV3_2G007560/CsaV3_2G007540/CsaV3_1G037990/CsaV3_3G033250/CsaV3_2G012420/CsaV3_5G000380/CsaV3_6G037090/CsaV3_4G008230/CsaV3_6G…	CsaV3_6G003390/CsaV3_2G025100/CsaV3_6G040720/CsaV3_3G019110/CsaV3_6G002880/CsaV3_1G034030/CsaV3_6G048860/CsaV3_6G013060/CsaV3_2G015650/CsaV3_UNG052420/CsaV3_4G006570/CsaV3_6G036710/CsaV3_1G043340/CsaV3_2G012310/CsaV3_5G034220/CsaV3_2G006860/CsaV3_3G004800/CsaV3_3G041240/CsaV3_2G007560/CsaV3_2G007540/CsaV3_1G037990/CsaV3_3G033250/CsaV3_2G012420/CsaV3_5G000380/CsaV3_6G037090/CsaV3_4G008230/CsaV3_6G…	70	53	CsaV3_6G003390/CsaV3_2G025100/CsaV3_3G019110/CsaV3_6G002880/CsaV3_1G034030/CsaV3_6G013060/CsaV3_UNG052420/CsaV3_4G006570/CsaV3_6G036710/CsaV3_1G043340/CsaV3_2G012310/CsaV3_5G034220/CsaV3_3G004800/CsaV3_3G041240/CsaV3_2G007560/CsaV3_2G007540/CsaV3_1G037990/CsaV3_3G033250/CsaV3_6G037090/CsaV3_4G008230/CsaV3_1G030500/CsaV3_3G026240/CsaV3_3G015830/CsaV3_2G014650/CsaV3_7G033100/CsaV3_1G014360/CsaV3_3G…	17	CsaV3_6G040720/CsaV3_6G048860/CsaV3_2G015650/CsaV3_2G006860/CsaV3_2G012420/CsaV3_5G000380/CsaV3_6G051160/CsaV3_2G016250/CsaV3_4G026140/CsaV3_5G000410/CsaV3_6G030920/CsaV3_3G045990/CsaV3_6G031210/CsaV3_5G008320/CsaV3_6G006480/CsaV3_3G020580/CsaV3_3G007340
BP	GO:0006096	glycolytic process	18/2759	27/5804	0.035357	0.440535	CsaV3_3G035920/CsaV3_3G023460/CsaV3_4G008960/CsaV3_6G040390/CsaV3_4G004200/CsaV3_6G040430/CsaV3_2G015280/CsaV3_7G021470/CsaV3_6G048080/CsaV3_5G028690/CsaV3_6G040340/CsaV3_4G000040/CsaV3_6G013500/CsaV3_1G046070/CsaV3_4G037690/CsaV3_6G040330/CsaV3_1G039980/CsaV3_2G030420	CsaV3_3G035920/CsaV3_3G023460/CsaV3_4G008960/CsaV3_6G040390/CsaV3_4G004200/CsaV3_6G040430/CsaV3_2G015280/CsaV3_7G021470/CsaV3_6G048080/CsaV3_5G028690/CsaV3_6G040340/CsaV3_4G000040/CsaV3_6G013500/CsaV3_1G046070/CsaV3_4G037690/CsaV3_6G040330/CsaV3_1G039980/CsaV3_2G030420	18	9	CsaV3_3G023460/CsaV3_4G008960/CsaV3_4G004200/CsaV3_6G048080/CsaV3_5G028690/CsaV3_4G000040/CsaV3_6G013500/CsaV3_1G039980/CsaV3_2G030420	9	CsaV3_3G035920/CsaV3_6G040390/CsaV3_6G040430/CsaV3_2G015280/CsaV3_7G021470/CsaV3_6G040340/CsaV3_1G046070/CsaV3_4G037690/CsaV3_6G040330
BP	GO:0006757	ATP generation from ADP	18/2759	27/5804	0.035357	0.440535	CsaV3_3G035920/CsaV3_3G023460/CsaV3_4G008960/CsaV3_6G040390/CsaV3_4G004200/CsaV3_6G040430/CsaV3_2G015280/CsaV3_7G021470/CsaV3_6G048080/CsaV3_5G028690/CsaV3_6G040340/CsaV3_4G000040/CsaV3_6G013500/CsaV3_1G046070/CsaV3_4G037690/CsaV3_6G040330/CsaV3_1G039980/CsaV3_2G030420	CsaV3_3G035920/CsaV3_3G023460/CsaV3_4G008960/CsaV3_6G040390/CsaV3_4G004200/CsaV3_6G040430/CsaV3_2G015280/CsaV3_7G021470/CsaV3_6G048080/CsaV3_5G028690/CsaV3_6G040340/CsaV3_4G000040/CsaV3_6G013500/CsaV3_1G046070/CsaV3_4G037690/CsaV3_6G040330/CsaV3_1G039980/CsaV3_2G030420	18	9	CsaV3_3G023460/CsaV3_4G008960/CsaV3_4G004200/CsaV3_6G048080/CsaV3_5G028690/CsaV3_4G000040/CsaV3_6G013500/CsaV3_1G039980/CsaV3_2G030420	9	CsaV3_3G035920/CsaV3_6G040390/CsaV3_6G040430/CsaV3_2G015280/CsaV3_7G021470/CsaV3_6G040340/CsaV3_1G046070/CsaV3_4G037690/CsaV3_6G040330
BP	GO:0009135	purine nucleoside diphosphate metabolic process	18/2759	27/5804	0.035357	0.440535	CsaV3_3G035920/CsaV3_3G023460/CsaV3_4G008960/CsaV3_6G040390/CsaV3_4G004200/CsaV3_6G040430/CsaV3_2G015280/CsaV3_7G021470/CsaV3_6G048080/CsaV3_5G028690/CsaV3_6G040340/CsaV3_4G000040/CsaV3_6G013500/CsaV3_1G046070/CsaV3_4G037690/CsaV3_6G040330/CsaV3_1G039980/CsaV3_2G030420	CsaV3_3G035920/CsaV3_3G023460/CsaV3_4G008960/CsaV3_6G040390/CsaV3_4G004200/CsaV3_6G040430/CsaV3_2G015280/CsaV3_7G021470/CsaV3_6G048080/CsaV3_5G028690/CsaV3_6G040340/CsaV3_4G000040/CsaV3_6G013500/CsaV3_1G046070/CsaV3_4G037690/CsaV3_6G040330/CsaV3_1G039980/CsaV3_2G030420	18	9	CsaV3_3G023460/CsaV3_4G008960/CsaV3_4G004200/CsaV3_6G048080/CsaV3_5G028690/CsaV3_4G000040/CsaV3_6G013500/CsaV3_1G039980/CsaV3_2G030420	9	CsaV3_3G035920/CsaV3_6G040390/CsaV3_6G040430/CsaV3_2G015280/CsaV3_7G021470/CsaV3_6G040340/CsaV3_1G046070/CsaV3_4G037690/CsaV3_6G040330
BP	GO:0009179	purine ribonucleoside diphosphate metabolic process	18/2759	27/5804	0.035357	0.440535	CsaV3_3G035920/CsaV3_3G023460/CsaV3_4G008960/CsaV3_6G040390/CsaV3_4G004200/CsaV3_6G040430/CsaV3_2G015280/CsaV3_7G021470/CsaV3_6G048080/CsaV3_5G028690/CsaV3_6G040340/CsaV3_4G000040/CsaV3_6G013500/CsaV3_1G046070/CsaV3_4G037690/CsaV3_6G040330/CsaV3_1G039980/CsaV3_2G030420	CsaV3_3G035920/CsaV3_3G023460/CsaV3_4G008960/CsaV3_6G040390/CsaV3_4G004200/CsaV3_6G040430/CsaV3_2G015280/CsaV3_7G021470/CsaV3_6G048080/CsaV3_5G028690/CsaV3_6G040340/CsaV3_4G000040/CsaV3_6G013500/CsaV3_1G046070/CsaV3_4G037690/CsaV3_6G040330/CsaV3_1G039980/CsaV3_2G030420	18	9	CsaV3_3G023460/CsaV3_4G008960/CsaV3_4G004200/CsaV3_6G048080/CsaV3_5G028690/CsaV3_4G000040/CsaV3_6G013500/CsaV3_1G039980/CsaV3_2G030420	9	CsaV3_3G035920/CsaV3_6G040390/CsaV3_6G040430/CsaV3_2G015280/CsaV3_7G021470/CsaV3_6G040340/CsaV3_1G046070/CsaV3_4G037690/CsaV3_6G040330
BP	GO:0009185	ribonucleoside diphosphate metabolic process	18/2759	27/5804	0.035357	0.440535	CsaV3_3G035920/CsaV3_3G023460/CsaV3_4G008960/CsaV3_6G040390/CsaV3_4G004200/CsaV3_6G040430/CsaV3_2G015280/CsaV3_7G021470/CsaV3_6G048080/CsaV3_5G028690/CsaV3_6G040340/CsaV3_4G000040/CsaV3_6G013500/CsaV3_1G046070/CsaV3_4G037690/CsaV3_6G040330/CsaV3_1G039980/CsaV3_2G030420	CsaV3_3G035920/CsaV3_3G023460/CsaV3_4G008960/CsaV3_6G040390/CsaV3_4G004200/CsaV3_6G040430/CsaV3_2G015280/CsaV3_7G021470/CsaV3_6G048080/CsaV3_5G028690/CsaV3_6G040340/CsaV3_4G000040/CsaV3_6G013500/CsaV3_1G046070/CsaV3_4G037690/CsaV3_6G040330/CsaV3_1G039980/CsaV3_2G030420	18	9	CsaV3_3G023460/CsaV3_4G008960/CsaV3_4G004200/CsaV3_6G048080/CsaV3_5G028690/CsaV3_4G000040/CsaV3_6G013500/CsaV3_1G039980/CsaV3_2G030420	9	CsaV3_3G035920/CsaV3_6G040390/CsaV3_6G040430/CsaV3_2G015280/CsaV3_7G021470/CsaV3_6G040340/CsaV3_1G046070/CsaV3_4G037690/CsaV3_6G040330
BP	GO:0042866	pyruvate biosynthetic process	18/2759	27/5804	0.035357	0.440535	CsaV3_3G035920/CsaV3_3G023460/CsaV3_4G008960/CsaV3_6G040390/CsaV3_4G004200/CsaV3_6G040430/CsaV3_2G015280/CsaV3_7G021470/CsaV3_6G048080/CsaV3_5G028690/CsaV3_6G040340/CsaV3_4G000040/CsaV3_6G013500/CsaV3_1G046070/CsaV3_4G037690/CsaV3_6G040330/CsaV3_1G039980/CsaV3_2G030420	CsaV3_3G035920/CsaV3_3G023460/CsaV3_4G008960/CsaV3_6G040390/CsaV3_4G004200/CsaV3_6G040430/CsaV3_2G015280/CsaV3_7G021470/CsaV3_6G048080/CsaV3_5G028690/CsaV3_6G040340/CsaV3_4G000040/CsaV3_6G013500/CsaV3_1G046070/CsaV3_4G037690/CsaV3_6G040330/CsaV3_1G039980/CsaV3_2G030420	18	9	CsaV3_3G023460/CsaV3_4G008960/CsaV3_4G004200/CsaV3_6G048080/CsaV3_5G028690/CsaV3_4G000040/CsaV3_6G013500/CsaV3_1G039980/CsaV3_2G030420	9	CsaV3_3G035920/CsaV3_6G040390/CsaV3_6G040430/CsaV3_2G015280/CsaV3_7G021470/CsaV3_6G040340/CsaV3_1G046070/CsaV3_4G037690/CsaV3_6G040330
BP	GO:0046031	ADP metabolic process	18/2759	27/5804	0.035357	0.440535	CsaV3_3G035920/CsaV3_3G023460/CsaV3_4G008960/CsaV3_6G040390/CsaV3_4G004200/CsaV3_6G040430/CsaV3_2G015280/CsaV3_7G021470/CsaV3_6G048080/CsaV3_5G028690/CsaV3_6G040340/CsaV3_4G000040/CsaV3_6G013500/CsaV3_1G046070/CsaV3_4G037690/CsaV3_6G040330/CsaV3_1G039980/CsaV3_2G030420	CsaV3_3G035920/CsaV3_3G023460/CsaV3_4G008960/CsaV3_6G040390/CsaV3_4G004200/CsaV3_6G040430/CsaV3_2G015280/CsaV3_7G021470/CsaV3_6G048080/CsaV3_5G028690/CsaV3_6G040340/CsaV3_4G000040/CsaV3_6G013500/CsaV3_1G046070/CsaV3_4G037690/CsaV3_6G040330/CsaV3_1G039980/CsaV3_2G030420	18	9	CsaV3_3G023460/CsaV3_4G008960/CsaV3_4G004200/CsaV3_6G048080/CsaV3_5G028690/CsaV3_4G000040/CsaV3_6G013500/CsaV3_1G039980/CsaV3_2G030420	9	CsaV3_3G035920/CsaV3_6G040390/CsaV3_6G040430/CsaV3_2G015280/CsaV3_7G021470/CsaV3_6G040340/CsaV3_1G046070/CsaV3_4G037690/CsaV3_6G040330
BP	GO:0044283	small molecule biosynthetic process	78/2759	141/5804	0.0369355	0.440535	CsaV3_1G036050/CsaV3_3G033790/CsaV3_6G040120/CsaV3_7G018620/CsaV3_3G021030/CsaV3_6G006560/CsaV3_1G029420/CsaV3_3G017450/CsaV3_1G038260/CsaV3_5G003990/CsaV3_5G002520/CsaV3_1G000670/CsaV3_3G035920/CsaV3_3G023460/CsaV3_3G041590/CsaV3_4G008960/CsaV3_1G031480/CsaV3_6G036360/CsaV3_6G040390/CsaV3_4G004200/CsaV3_6G014760/CsaV3_5G008630/CsaV3_6G040430/CsaV3_5G002770/CsaV3_2G015280/CsaV3_6G003290/CsaV3_7G0…	CsaV3_1G036050/CsaV3_3G033790/CsaV3_6G040120/CsaV3_7G018620/CsaV3_3G021030/CsaV3_6G006560/CsaV3_1G029420/CsaV3_3G017450/CsaV3_1G038260/CsaV3_5G003990/CsaV3_5G002520/CsaV3_1G000670/CsaV3_3G035920/CsaV3_3G023460/CsaV3_3G041590/CsaV3_4G008960/CsaV3_1G031480/CsaV3_6G036360/CsaV3_6G040390/CsaV3_4G004200/CsaV3_6G014760/CsaV3_5G008630/CsaV3_6G040430/CsaV3_5G002770/CsaV3_2G015280/CsaV3_6G003290/CsaV3_7G0…	78	35	CsaV3_3G033790/CsaV3_6G040120/CsaV3_7G018620/CsaV3_1G029420/CsaV3_3G017450/CsaV3_1G038260/CsaV3_5G003990/CsaV3_3G023460/CsaV3_4G008960/CsaV3_6G036360/CsaV3_4G004200/CsaV3_6G003290/CsaV3_6G048080/CsaV3_5G028690/CsaV3_4G024670/CsaV3_4G025950/CsaV3_2G007090/CsaV3_6G048980/CsaV3_1G009560/CsaV3_7G005980/CsaV3_7G022530/CsaV3_4G000040/CsaV3_6G013500/CsaV3_2G028690/CsaV3_1G014500/CsaV3_6G044640/CsaV3_3G0…	43	CsaV3_1G036050/CsaV3_3G021030/CsaV3_6G006560/CsaV3_5G002520/CsaV3_1G000670/CsaV3_3G035920/CsaV3_3G041590/CsaV3_1G031480/CsaV3_6G040390/CsaV3_6G014760/CsaV3_5G008630/CsaV3_6G040430/CsaV3_5G002770/CsaV3_2G015280/CsaV3_7G021470/CsaV3_6G040340/CsaV3_1G033910/CsaV3_6G052510/CsaV3_3G021690/CsaV3_6G051460/CsaV3_5G023610/CsaV3_3G003250/CsaV3_3G016820/CsaV3_4G036210/CsaV3_1G042270/CsaV3_5G014440/CsaV3_6G0…
BP	GO:0006888	ER to Golgi vesicle-mediated transport	313957	1426182	0.0392586	0.440535	CsaV3_2G012310/CsaV3_1G037990/CsaV3_3G015830/CsaV3_2G007260/CsaV3_5G029690/CsaV3_5G000990/CsaV3_6G006480/CsaV3_2G013200	CsaV3_2G012310/CsaV3_1G037990/CsaV3_3G015830/CsaV3_2G007260/CsaV3_5G029690/CsaV3_5G000990/CsaV3_6G006480/CsaV3_2G013200	8	5	CsaV3_2G012310/CsaV3_1G037990/CsaV3_3G015830/CsaV3_5G029690/CsaV3_2G013200	3	CsaV3_2G007260/CsaV3_5G000990/CsaV3_6G006480
BP	GO:0046434	organophosphate catabolic process	20/2759	31/5804	0.0426253	0.440535	CsaV3_3G035920/CsaV3_3G023460/CsaV3_4G008960/CsaV3_6G040390/CsaV3_4G004200/CsaV3_6G040430/CsaV3_2G015280/CsaV3_7G021470/CsaV3_6G048080/CsaV3_5G028690/CsaV3_6G040340/CsaV3_5G024850/CsaV3_4G000040/CsaV3_6G013500/CsaV3_1G046070/CsaV3_4G037690/CsaV3_5G026900/CsaV3_6G040330/CsaV3_1G039980/CsaV3_2G030420	CsaV3_3G035920/CsaV3_3G023460/CsaV3_4G008960/CsaV3_6G040390/CsaV3_4G004200/CsaV3_6G040430/CsaV3_2G015280/CsaV3_7G021470/CsaV3_6G048080/CsaV3_5G028690/CsaV3_6G040340/CsaV3_5G024850/CsaV3_4G000040/CsaV3_6G013500/CsaV3_1G046070/CsaV3_4G037690/CsaV3_5G026900/CsaV3_6G040330/CsaV3_1G039980/CsaV3_2G030420	20	11	CsaV3_3G023460/CsaV3_4G008960/CsaV3_4G004200/CsaV3_6G048080/CsaV3_5G028690/CsaV3_5G024850/CsaV3_4G000040/CsaV3_6G013500/CsaV3_5G026900/CsaV3_1G039980/CsaV3_2G030420	9	CsaV3_3G035920/CsaV3_6G040390/CsaV3_6G040430/CsaV3_2G015280/CsaV3_7G021470/CsaV3_6G040340/CsaV3_1G046070/CsaV3_4G037690/CsaV3_6G040330
BP	GO:0045184	establishment of protein localization	63/2759	113/5804	0.047414	0.440535	CsaV3_6G003390/CsaV3_2G025100/CsaV3_6G040720/CsaV3_3G019110/CsaV3_6G002880/CsaV3_1G034030/CsaV3_6G048860/CsaV3_6G013060/CsaV3_UNG052420/CsaV3_4G006570/CsaV3_6G036710/CsaV3_1G043340/CsaV3_2G012310/CsaV3_2G006860/CsaV3_3G004800/CsaV3_3G041240/CsaV3_2G007560/CsaV3_2G007540/CsaV3_1G037990/CsaV3_3G033250/CsaV3_2G012420/CsaV3_5G000380/CsaV3_6G037090/CsaV3_4G008230/CsaV3_1G030500/CsaV3_3G026240/CsaV3_2G…	CsaV3_6G003390/CsaV3_2G025100/CsaV3_6G040720/CsaV3_3G019110/CsaV3_6G002880/CsaV3_1G034030/CsaV3_6G048860/CsaV3_6G013060/CsaV3_UNG052420/CsaV3_4G006570/CsaV3_6G036710/CsaV3_1G043340/CsaV3_2G012310/CsaV3_2G006860/CsaV3_3G004800/CsaV3_3G041240/CsaV3_2G007560/CsaV3_2G007540/CsaV3_1G037990/CsaV3_3G033250/CsaV3_2G012420/CsaV3_5G000380/CsaV3_6G037090/CsaV3_4G008230/CsaV3_1G030500/CsaV3_3G026240/CsaV3_2G…	63	49	CsaV3_6G003390/CsaV3_2G025100/CsaV3_3G019110/CsaV3_6G002880/CsaV3_1G034030/CsaV3_6G013060/CsaV3_UNG052420/CsaV3_4G006570/CsaV3_6G036710/CsaV3_1G043340/CsaV3_2G012310/CsaV3_3G004800/CsaV3_3G041240/CsaV3_2G007560/CsaV3_2G007540/CsaV3_1G037990/CsaV3_3G033250/CsaV3_6G037090/CsaV3_4G008230/CsaV3_1G030500/CsaV3_3G026240/CsaV3_3G015830/CsaV3_2G014650/CsaV3_7G033100/CsaV3_1G014360/CsaV3_7G000230/CsaV3_5G…	14	CsaV3_6G040720/CsaV3_6G048860/CsaV3_2G006860/CsaV3_2G012420/CsaV3_5G000380/CsaV3_2G016250/CsaV3_4G026140/CsaV3_5G000410/CsaV3_3G045990/CsaV3_6G031210/CsaV3_5G008320/CsaV3_6G006480/CsaV3_3G020580/CsaV3_3G007340
BP	GO:0006413	translational initiation	314079	17/5804	0.0474675	0.440535	CsaV3_7G021830/CsaV3_1G023010/CsaV3_3G005110/CsaV3_7G003720/CsaV3_1G040520/CsaV3_2G012490/CsaV3_2G015740/CsaV3_2G033280/CsaV3_1G014460/CsaV3_2G016200/CsaV3_4G033730/CsaV3_7G003030	CsaV3_7G021830/CsaV3_1G023010/CsaV3_3G005110/CsaV3_7G003720/CsaV3_1G040520/CsaV3_2G012490/CsaV3_2G015740/CsaV3_2G033280/CsaV3_1G014460/CsaV3_2G016200/CsaV3_4G033730/CsaV3_7G003030	12	7	CsaV3_7G021830/CsaV3_3G005110/CsaV3_7G003720/CsaV3_2G033280/CsaV3_2G016200/CsaV3_4G033730/CsaV3_7G003030	5	CsaV3_1G023010/CsaV3_1G040520/CsaV3_2G012490/CsaV3_2G015740/CsaV3_1G014460
BP	GO:0007165	signal transduction	94/2759	174/5804	0.0482715	0.440535	CsaV3_6G000230/CsaV3_5G000090/CsaV3_7G029600/CsaV3_6G022600/CsaV3_4G003850/CsaV3_3G002400/CsaV3_3G007720/CsaV3_5G037660/CsaV3_2G009260/CsaV3_3G014010/CsaV3_6G050960/CsaV3_5G039660/CsaV3_2G002330/CsaV3_6G001840/CsaV3_2G033620/CsaV3_2G016070/CsaV3_2G025170/CsaV3_1G028820/CsaV3_6G005590/CsaV3_1G015390/CsaV3_3G015190/CsaV3_3G036220/CsaV3_3G049890/CsaV3_3G031710/CsaV3_5G039650/CsaV3_3G002030/CsaV3_4G0…	CsaV3_6G000230/CsaV3_5G000090/CsaV3_7G029600/CsaV3_6G022600/CsaV3_4G003850/CsaV3_3G002400/CsaV3_3G007720/CsaV3_5G037660/CsaV3_2G009260/CsaV3_3G014010/CsaV3_6G050960/CsaV3_5G039660/CsaV3_2G002330/CsaV3_6G001840/CsaV3_2G033620/CsaV3_2G016070/CsaV3_2G025170/CsaV3_1G028820/CsaV3_6G005590/CsaV3_1G015390/CsaV3_3G015190/CsaV3_3G036220/CsaV3_3G049890/CsaV3_3G031710/CsaV3_5G039650/CsaV3_3G002030/CsaV3_4G0…	94	52	CsaV3_6G000230/CsaV3_5G000090/CsaV3_7G029600/CsaV3_6G022600/CsaV3_3G002400/CsaV3_5G037660/CsaV3_2G009260/CsaV3_6G050960/CsaV3_2G002330/CsaV3_6G001840/CsaV3_2G033620/CsaV3_2G025170/CsaV3_1G015390/CsaV3_3G036220/CsaV3_3G049890/CsaV3_4G036110/CsaV3_6G009450/CsaV3_2G003670/CsaV3_7G002160/CsaV3_1G044700/CsaV3_3G010020/CsaV3_5G005730/CsaV3_7G021710/CsaV3_1G036820/CsaV3_1G033100/CsaV3_2G014330/CsaV3_6G0…	42	CsaV3_4G003850/CsaV3_3G007720/CsaV3_3G014010/CsaV3_5G039660/CsaV3_2G016070/CsaV3_1G028820/CsaV3_6G005590/CsaV3_3G015190/CsaV3_3G031710/CsaV3_5G039650/CsaV3_3G002030/CsaV3_2G004890/CsaV3_2G030700/CsaV3_6G008270/CsaV3_3G007670/CsaV3_4G024430/CsaV3_4G004290/CsaV3_4G036630/CsaV3_2G034580/CsaV3_1G004280/CsaV3_6G002680/CsaV3_3G003260/CsaV3_1G001860/novel.1211/CsaV3_5G036740/CsaV3_5G011030/CsaV3_1G02869…
BP	GO:0023052	signaling	94/2759	174/5804	0.0482715	0.440535	CsaV3_6G000230/CsaV3_5G000090/CsaV3_7G029600/CsaV3_6G022600/CsaV3_4G003850/CsaV3_3G002400/CsaV3_3G007720/CsaV3_5G037660/CsaV3_2G009260/CsaV3_3G014010/CsaV3_6G050960/CsaV3_5G039660/CsaV3_2G002330/CsaV3_6G001840/CsaV3_2G033620/CsaV3_2G016070/CsaV3_2G025170/CsaV3_1G028820/CsaV3_6G005590/CsaV3_1G015390/CsaV3_3G015190/CsaV3_3G036220/CsaV3_3G049890/CsaV3_3G031710/CsaV3_5G039650/CsaV3_3G002030/CsaV3_4G0…	CsaV3_6G000230/CsaV3_5G000090/CsaV3_7G029600/CsaV3_6G022600/CsaV3_4G003850/CsaV3_3G002400/CsaV3_3G007720/CsaV3_5G037660/CsaV3_2G009260/CsaV3_3G014010/CsaV3_6G050960/CsaV3_5G039660/CsaV3_2G002330/CsaV3_6G001840/CsaV3_2G033620/CsaV3_2G016070/CsaV3_2G025170/CsaV3_1G028820/CsaV3_6G005590/CsaV3_1G015390/CsaV3_3G015190/CsaV3_3G036220/CsaV3_3G049890/CsaV3_3G031710/CsaV3_5G039650/CsaV3_3G002030/CsaV3_4G0…	94	52	CsaV3_6G000230/CsaV3_5G000090/CsaV3_7G029600/CsaV3_6G022600/CsaV3_3G002400/CsaV3_5G037660/CsaV3_2G009260/CsaV3_6G050960/CsaV3_2G002330/CsaV3_6G001840/CsaV3_2G033620/CsaV3_2G025170/CsaV3_1G015390/CsaV3_3G036220/CsaV3_3G049890/CsaV3_4G036110/CsaV3_6G009450/CsaV3_2G003670/CsaV3_7G002160/CsaV3_1G044700/CsaV3_3G010020/CsaV3_5G005730/CsaV3_7G021710/CsaV3_1G036820/CsaV3_1G033100/CsaV3_2G014330/CsaV3_6G0…	42	CsaV3_4G003850/CsaV3_3G007720/CsaV3_3G014010/CsaV3_5G039660/CsaV3_2G016070/CsaV3_1G028820/CsaV3_6G005590/CsaV3_3G015190/CsaV3_3G031710/CsaV3_5G039650/CsaV3_3G002030/CsaV3_2G004890/CsaV3_2G030700/CsaV3_6G008270/CsaV3_3G007670/CsaV3_4G024430/CsaV3_4G004290/CsaV3_4G036630/CsaV3_2G034580/CsaV3_1G004280/CsaV3_6G002680/CsaV3_3G003260/CsaV3_1G001860/novel.1211/CsaV3_5G036740/CsaV3_5G011030/CsaV3_1G02869…
BP	GO:0072525	pyridine-containing compound biosynthetic process	22/2759	35/5804	0.0492035	0.440535	CsaV3_3G033790/CsaV3_3G035920/CsaV3_3G023460/CsaV3_4G008960/CsaV3_6G040390/CsaV3_4G004200/CsaV3_6G040430/CsaV3_2G015280/CsaV3_7G021470/CsaV3_6G048080/CsaV3_5G028690/CsaV3_6G040340/CsaV3_1G008930/CsaV3_4G000040/CsaV3_6G013500/CsaV3_6G013840/CsaV3_1G046070/CsaV3_4G037690/CsaV3_1G042920/CsaV3_6G040330/CsaV3_1G039980/CsaV3_2G030420	CsaV3_3G033790/CsaV3_3G035920/CsaV3_3G023460/CsaV3_4G008960/CsaV3_6G040390/CsaV3_4G004200/CsaV3_6G040430/CsaV3_2G015280/CsaV3_7G021470/CsaV3_6G048080/CsaV3_5G028690/CsaV3_6G040340/CsaV3_1G008930/CsaV3_4G000040/CsaV3_6G013500/CsaV3_6G013840/CsaV3_1G046070/CsaV3_4G037690/CsaV3_1G042920/CsaV3_6G040330/CsaV3_1G039980/CsaV3_2G030420	22	11	CsaV3_3G033790/CsaV3_3G023460/CsaV3_4G008960/CsaV3_4G004200/CsaV3_6G048080/CsaV3_5G028690/CsaV3_1G008930/CsaV3_4G000040/CsaV3_6G013500/CsaV3_1G039980/CsaV3_2G030420	11	CsaV3_3G035920/CsaV3_6G040390/CsaV3_6G040430/CsaV3_2G015280/CsaV3_7G021470/CsaV3_6G040340/CsaV3_6G013840/CsaV3_1G046070/CsaV3_4G037690/CsaV3_1G042920/CsaV3_6G040330
CC	GO:0005840	ribosome	116/980	195/2093	0.000133047	0.014236	CsaV3_3G031360/CsaV3_4G007890/CsaV3_4G031980/CsaV3_4G005150/CsaV3_6G022450/CsaV3_3G035560/CsaV3_3G012980/CsaV3_5G031430/CsaV3_7G021070/CsaV3_2G012470/CsaV3_3G007620/CsaV3_5G038460/CsaV3_7G007910/CsaV3_3G039740/CsaV3_4G008470/novel.376/CsaV3_6G002260/CsaV3_3G044840/CsaV3_2G032240/CsaV3_6G041770/CsaV3_6G046990/CsaV3_6G007430/CsaV3_4G011770/CsaV3_6G032270/CsaV3_7G031330/CsaV3_3G037470/CsaV3_3G035780…	CsaV3_3G031360/CsaV3_4G007890/CsaV3_4G031980/CsaV3_4G005150/CsaV3_6G022450/CsaV3_3G035560/CsaV3_3G012980/CsaV3_5G031430/CsaV3_7G021070/CsaV3_2G012470/CsaV3_3G007620/CsaV3_5G038460/CsaV3_7G007910/CsaV3_3G039740/CsaV3_4G008470/-/CsaV3_6G002260/CsaV3_3G044840/CsaV3_2G032240/CsaV3_6G041770/CsaV3_6G046990/CsaV3_6G007430/CsaV3_4G011770/CsaV3_6G032270/CsaV3_7G031330/CsaV3_3G037470/CsaV3_3G035780/CsaV3_3…	116	20	CsaV3_3G044840/CsaV3_6G041770/CsaV3_3G040630/CsaV3_6G050190/CsaV3_6G031500/CsaV3_4G001790/CsaV3_5G001160/CsaV3_4G034910/CsaV3_5G001490/CsaV3_2G008470/CsaV3_2G004560/CsaV3_6G002760/CsaV3_6G006340/CsaV3_4G009970/CsaV3_2G018130/CsaV3_6G016380/CsaV3_5G001000/CsaV3_7G003660/CsaV3_4G031960/CsaV3_3G030390	96	CsaV3_3G031360/CsaV3_4G007890/CsaV3_4G031980/CsaV3_4G005150/CsaV3_6G022450/CsaV3_3G035560/CsaV3_3G012980/CsaV3_5G031430/CsaV3_7G021070/CsaV3_2G012470/CsaV3_3G007620/CsaV3_5G038460/CsaV3_7G007910/CsaV3_3G039740/CsaV3_4G008470/novel.376/CsaV3_6G002260/CsaV3_2G032240/CsaV3_6G046990/CsaV3_6G007430/CsaV3_4G011770/CsaV3_6G032270/CsaV3_7G031330/CsaV3_3G037470/CsaV3_3G035780/CsaV3_3G011980/CsaV3_7G008490…
CC	GO:1990904	ribonucleoprotein complex	127/980	221/2093	0.000519699	0.0278039	CsaV3_3G031360/CsaV3_6G040720/CsaV3_4G007890/CsaV3_4G031980/CsaV3_4G005150/CsaV3_6G022450/CsaV3_3G035560/CsaV3_3G012980/CsaV3_5G031430/CsaV3_5G005710/CsaV3_7G021070/CsaV3_2G012470/CsaV3_3G007620/CsaV3_1G043340/CsaV3_5G038460/CsaV3_7G007910/CsaV3_3G039740/CsaV3_4G008470/novel.376/CsaV3_6G002260/CsaV3_3G044840/CsaV3_2G032240/CsaV3_6G041770/CsaV3_6G046990/CsaV3_6G007430/CsaV3_4G011770/CsaV3_6G032270…	CsaV3_3G031360/CsaV3_6G040720/CsaV3_4G007890/CsaV3_4G031980/CsaV3_4G005150/CsaV3_6G022450/CsaV3_3G035560/CsaV3_3G012980/CsaV3_5G031430/CsaV3_5G005710/CsaV3_7G021070/CsaV3_2G012470/CsaV3_3G007620/CsaV3_1G043340/CsaV3_5G038460/CsaV3_7G007910/CsaV3_3G039740/CsaV3_4G008470/-/CsaV3_6G002260/CsaV3_3G044840/CsaV3_2G032240/CsaV3_6G041770/CsaV3_6G046990/CsaV3_6G007430/CsaV3_4G011770/CsaV3_6G032270/CsaV3_7…	127	27	CsaV3_1G043340/CsaV3_3G044840/CsaV3_6G041770/CsaV3_3G040630/CsaV3_6G050190/CsaV3_3G004310/CsaV3_2G009090/CsaV3_6G031500/CsaV3_4G001790/CsaV3_5G001160/CsaV3_4G034910/CsaV3_5G001490/CsaV3_2G008470/CsaV3_2G004560/CsaV3_6G033830/CsaV3_6G002760/CsaV3_1G037130/CsaV3_6G006340/CsaV3_4G009970/CsaV3_2G018130/CsaV3_6G016380/CsaV3_5G001000/CsaV3_7G003660/CsaV3_7G029310/CsaV3_1G000640/CsaV3_4G031960/CsaV3_3G0…	100	CsaV3_3G031360/CsaV3_6G040720/CsaV3_4G007890/CsaV3_4G031980/CsaV3_4G005150/CsaV3_6G022450/CsaV3_3G035560/CsaV3_3G012980/CsaV3_5G031430/CsaV3_5G005710/CsaV3_7G021070/CsaV3_2G012470/CsaV3_3G007620/CsaV3_5G038460/CsaV3_7G007910/CsaV3_3G039740/CsaV3_4G008470/novel.376/CsaV3_6G002260/CsaV3_2G032240/CsaV3_6G046990/CsaV3_6G007430/CsaV3_4G011770/CsaV3_6G032270/CsaV3_7G031330/CsaV3_3G037470/CsaV3_3G035780…
CC	GO:0005798	Golgi-associated vesicle	13/980	16/2093	0.00516309	0.0424962	CsaV3_2G012310/CsaV3_1G037990/CsaV3_3G015830/CsaV3_2G014650/CsaV3_7G000230/CsaV3_4G026140/CsaV3_5G029690/CsaV3_3G031230/CsaV3_6G006480/CsaV3_2G013200/CsaV3_6G001890/CsaV3_7G023500/CsaV3_6G050000	CsaV3_2G012310/CsaV3_1G037990/CsaV3_3G015830/CsaV3_2G014650/CsaV3_7G000230/CsaV3_4G026140/CsaV3_5G029690/CsaV3_3G031230/CsaV3_6G006480/CsaV3_2G013200/CsaV3_6G001890/CsaV3_7G023500/CsaV3_6G050000	13	11	CsaV3_2G012310/CsaV3_1G037990/CsaV3_3G015830/CsaV3_2G014650/CsaV3_7G000230/CsaV3_5G029690/CsaV3_3G031230/CsaV3_2G013200/CsaV3_6G001890/CsaV3_7G023500/CsaV3_6G050000	2	CsaV3_4G026140/CsaV3_6G006480
CC	GO:0012506	vesicle membrane	13/980	16/2093	0.00516309	0.0424962	CsaV3_2G012310/CsaV3_1G037990/CsaV3_3G015830/CsaV3_2G014650/CsaV3_7G000230/CsaV3_4G026140/CsaV3_5G029690/CsaV3_3G031230/CsaV3_6G006480/CsaV3_2G013200/CsaV3_6G001890/CsaV3_7G023500/CsaV3_6G050000	CsaV3_2G012310/CsaV3_1G037990/CsaV3_3G015830/CsaV3_2G014650/CsaV3_7G000230/CsaV3_4G026140/CsaV3_5G029690/CsaV3_3G031230/CsaV3_6G006480/CsaV3_2G013200/CsaV3_6G001890/CsaV3_7G023500/CsaV3_6G050000	13	11	CsaV3_2G012310/CsaV3_1G037990/CsaV3_3G015830/CsaV3_2G014650/CsaV3_7G000230/CsaV3_5G029690/CsaV3_3G031230/CsaV3_2G013200/CsaV3_6G001890/CsaV3_7G023500/CsaV3_6G050000	2	CsaV3_4G026140/CsaV3_6G006480
CC	GO:0030120	vesicle coat	13/980	16/2093	0.00516309	0.0424962	CsaV3_2G012310/CsaV3_1G037990/CsaV3_3G015830/CsaV3_2G014650/CsaV3_7G000230/CsaV3_4G026140/CsaV3_5G029690/CsaV3_3G031230/CsaV3_6G006480/CsaV3_2G013200/CsaV3_6G001890/CsaV3_7G023500/CsaV3_6G050000	CsaV3_2G012310/CsaV3_1G037990/CsaV3_3G015830/CsaV3_2G014650/CsaV3_7G000230/CsaV3_4G026140/CsaV3_5G029690/CsaV3_3G031230/CsaV3_6G006480/CsaV3_2G013200/CsaV3_6G001890/CsaV3_7G023500/CsaV3_6G050000	13	11	CsaV3_2G012310/CsaV3_1G037990/CsaV3_3G015830/CsaV3_2G014650/CsaV3_7G000230/CsaV3_5G029690/CsaV3_3G031230/CsaV3_2G013200/CsaV3_6G001890/CsaV3_7G023500/CsaV3_6G050000	2	CsaV3_4G026140/CsaV3_6G006480
CC	GO:0030135	coated vesicle	13/980	16/2093	0.00516309	0.0424962	CsaV3_2G012310/CsaV3_1G037990/CsaV3_3G015830/CsaV3_2G014650/CsaV3_7G000230/CsaV3_4G026140/CsaV3_5G029690/CsaV3_3G031230/CsaV3_6G006480/CsaV3_2G013200/CsaV3_6G001890/CsaV3_7G023500/CsaV3_6G050000	CsaV3_2G012310/CsaV3_1G037990/CsaV3_3G015830/CsaV3_2G014650/CsaV3_7G000230/CsaV3_4G026140/CsaV3_5G029690/CsaV3_3G031230/CsaV3_6G006480/CsaV3_2G013200/CsaV3_6G001890/CsaV3_7G023500/CsaV3_6G050000	13	11	CsaV3_2G012310/CsaV3_1G037990/CsaV3_3G015830/CsaV3_2G014650/CsaV3_7G000230/CsaV3_5G029690/CsaV3_3G031230/CsaV3_2G013200/CsaV3_6G001890/CsaV3_7G023500/CsaV3_6G050000	2	CsaV3_4G026140/CsaV3_6G006480
CC	GO:0030659	cytoplasmic vesicle membrane	13/980	16/2093	0.00516309	0.0424962	CsaV3_2G012310/CsaV3_1G037990/CsaV3_3G015830/CsaV3_2G014650/CsaV3_7G000230/CsaV3_4G026140/CsaV3_5G029690/CsaV3_3G031230/CsaV3_6G006480/CsaV3_2G013200/CsaV3_6G001890/CsaV3_7G023500/CsaV3_6G050000	CsaV3_2G012310/CsaV3_1G037990/CsaV3_3G015830/CsaV3_2G014650/CsaV3_7G000230/CsaV3_4G026140/CsaV3_5G029690/CsaV3_3G031230/CsaV3_6G006480/CsaV3_2G013200/CsaV3_6G001890/CsaV3_7G023500/CsaV3_6G050000	13	11	CsaV3_2G012310/CsaV3_1G037990/CsaV3_3G015830/CsaV3_2G014650/CsaV3_7G000230/CsaV3_5G029690/CsaV3_3G031230/CsaV3_2G013200/CsaV3_6G001890/CsaV3_7G023500/CsaV3_6G050000	2	CsaV3_4G026140/CsaV3_6G006480
CC	GO:0030660	Golgi-associated vesicle membrane	13/980	16/2093	0.00516309	0.0424962	CsaV3_2G012310/CsaV3_1G037990/CsaV3_3G015830/CsaV3_2G014650/CsaV3_7G000230/CsaV3_4G026140/CsaV3_5G029690/CsaV3_3G031230/CsaV3_6G006480/CsaV3_2G013200/CsaV3_6G001890/CsaV3_7G023500/CsaV3_6G050000	CsaV3_2G012310/CsaV3_1G037990/CsaV3_3G015830/CsaV3_2G014650/CsaV3_7G000230/CsaV3_4G026140/CsaV3_5G029690/CsaV3_3G031230/CsaV3_6G006480/CsaV3_2G013200/CsaV3_6G001890/CsaV3_7G023500/CsaV3_6G050000	13	11	CsaV3_2G012310/CsaV3_1G037990/CsaV3_3G015830/CsaV3_2G014650/CsaV3_7G000230/CsaV3_5G029690/CsaV3_3G031230/CsaV3_2G013200/CsaV3_6G001890/CsaV3_7G023500/CsaV3_6G050000	2	CsaV3_4G026140/CsaV3_6G006480
CC	GO:0030662	coated vesicle membrane	13/980	16/2093	0.00516309	0.0424962	CsaV3_2G012310/CsaV3_1G037990/CsaV3_3G015830/CsaV3_2G014650/CsaV3_7G000230/CsaV3_4G026140/CsaV3_5G029690/CsaV3_3G031230/CsaV3_6G006480/CsaV3_2G013200/CsaV3_6G001890/CsaV3_7G023500/CsaV3_6G050000	CsaV3_2G012310/CsaV3_1G037990/CsaV3_3G015830/CsaV3_2G014650/CsaV3_7G000230/CsaV3_4G026140/CsaV3_5G029690/CsaV3_3G031230/CsaV3_6G006480/CsaV3_2G013200/CsaV3_6G001890/CsaV3_7G023500/CsaV3_6G050000	13	11	CsaV3_2G012310/CsaV3_1G037990/CsaV3_3G015830/CsaV3_2G014650/CsaV3_7G000230/CsaV3_5G029690/CsaV3_3G031230/CsaV3_2G013200/CsaV3_6G001890/CsaV3_7G023500/CsaV3_6G050000	2	CsaV3_4G026140/CsaV3_6G006480
CC	GO:0031410	cytoplasmic vesicle	13/980	16/2093	0.00516309	0.0424962	CsaV3_2G012310/CsaV3_1G037990/CsaV3_3G015830/CsaV3_2G014650/CsaV3_7G000230/CsaV3_4G026140/CsaV3_5G029690/CsaV3_3G031230/CsaV3_6G006480/CsaV3_2G013200/CsaV3_6G001890/CsaV3_7G023500/CsaV3_6G050000	CsaV3_2G012310/CsaV3_1G037990/CsaV3_3G015830/CsaV3_2G014650/CsaV3_7G000230/CsaV3_4G026140/CsaV3_5G029690/CsaV3_3G031230/CsaV3_6G006480/CsaV3_2G013200/CsaV3_6G001890/CsaV3_7G023500/CsaV3_6G050000	13	11	CsaV3_2G012310/CsaV3_1G037990/CsaV3_3G015830/CsaV3_2G014650/CsaV3_7G000230/CsaV3_5G029690/CsaV3_3G031230/CsaV3_2G013200/CsaV3_6G001890/CsaV3_7G023500/CsaV3_6G050000	2	CsaV3_4G026140/CsaV3_6G006480
CC	GO:0031982	vesicle	13/980	16/2093	0.00516309	0.0424962	CsaV3_2G012310/CsaV3_1G037990/CsaV3_3G015830/CsaV3_2G014650/CsaV3_7G000230/CsaV3_4G026140/CsaV3_5G029690/CsaV3_3G031230/CsaV3_6G006480/CsaV3_2G013200/CsaV3_6G001890/CsaV3_7G023500/CsaV3_6G050000	CsaV3_2G012310/CsaV3_1G037990/CsaV3_3G015830/CsaV3_2G014650/CsaV3_7G000230/CsaV3_4G026140/CsaV3_5G029690/CsaV3_3G031230/CsaV3_6G006480/CsaV3_2G013200/CsaV3_6G001890/CsaV3_7G023500/CsaV3_6G050000	13	11	CsaV3_2G012310/CsaV3_1G037990/CsaV3_3G015830/CsaV3_2G014650/CsaV3_7G000230/CsaV3_5G029690/CsaV3_3G031230/CsaV3_2G013200/CsaV3_6G001890/CsaV3_7G023500/CsaV3_6G050000	2	CsaV3_4G026140/CsaV3_6G006480
CC	GO:0044433	cytoplasmic vesicle part	13/980	16/2093	0.00516309	0.0424962	CsaV3_2G012310/CsaV3_1G037990/CsaV3_3G015830/CsaV3_2G014650/CsaV3_7G000230/CsaV3_4G026140/CsaV3_5G029690/CsaV3_3G031230/CsaV3_6G006480/CsaV3_2G013200/CsaV3_6G001890/CsaV3_7G023500/CsaV3_6G050000	CsaV3_2G012310/CsaV3_1G037990/CsaV3_3G015830/CsaV3_2G014650/CsaV3_7G000230/CsaV3_4G026140/CsaV3_5G029690/CsaV3_3G031230/CsaV3_6G006480/CsaV3_2G013200/CsaV3_6G001890/CsaV3_7G023500/CsaV3_6G050000	13	11	CsaV3_2G012310/CsaV3_1G037990/CsaV3_3G015830/CsaV3_2G014650/CsaV3_7G000230/CsaV3_5G029690/CsaV3_3G031230/CsaV3_2G013200/CsaV3_6G001890/CsaV3_7G023500/CsaV3_6G050000	2	CsaV3_4G026140/CsaV3_6G006480
CC	GO:0097708	intracellular vesicle	13/980	16/2093	0.00516309	0.0424962	CsaV3_2G012310/CsaV3_1G037990/CsaV3_3G015830/CsaV3_2G014650/CsaV3_7G000230/CsaV3_4G026140/CsaV3_5G029690/CsaV3_3G031230/CsaV3_6G006480/CsaV3_2G013200/CsaV3_6G001890/CsaV3_7G023500/CsaV3_6G050000	CsaV3_2G012310/CsaV3_1G037990/CsaV3_3G015830/CsaV3_2G014650/CsaV3_7G000230/CsaV3_4G026140/CsaV3_5G029690/CsaV3_3G031230/CsaV3_6G006480/CsaV3_2G013200/CsaV3_6G001890/CsaV3_7G023500/CsaV3_6G050000	13	11	CsaV3_2G012310/CsaV3_1G037990/CsaV3_3G015830/CsaV3_2G014650/CsaV3_7G000230/CsaV3_5G029690/CsaV3_3G031230/CsaV3_2G013200/CsaV3_6G001890/CsaV3_7G023500/CsaV3_6G050000	2	CsaV3_4G026140/CsaV3_6G006480
CC	GO:0030133	transport vesicle	9/980	70768	0.00615907	0.0439347	CsaV3_2G012310/CsaV3_1G037990/CsaV3_3G015830/CsaV3_4G026140/CsaV3_5G029690/CsaV3_6G006480/CsaV3_2G013200/CsaV3_6G001890/CsaV3_6G050000	CsaV3_2G012310/CsaV3_1G037990/CsaV3_3G015830/CsaV3_4G026140/CsaV3_5G029690/CsaV3_6G006480/CsaV3_2G013200/CsaV3_6G001890/CsaV3_6G050000	9	7	CsaV3_2G012310/CsaV3_1G037990/CsaV3_3G015830/CsaV3_5G029690/CsaV3_2G013200/CsaV3_6G001890/CsaV3_6G050000	2	CsaV3_4G026140/CsaV3_6G006480
CC	GO:0030658	transport vesicle membrane	9/980	70768	0.00615907	0.0439347	CsaV3_2G012310/CsaV3_1G037990/CsaV3_3G015830/CsaV3_4G026140/CsaV3_5G029690/CsaV3_6G006480/CsaV3_2G013200/CsaV3_6G001890/CsaV3_6G050000	CsaV3_2G012310/CsaV3_1G037990/CsaV3_3G015830/CsaV3_4G026140/CsaV3_5G029690/CsaV3_6G006480/CsaV3_2G013200/CsaV3_6G001890/CsaV3_6G050000	9	7	CsaV3_2G012310/CsaV3_1G037990/CsaV3_3G015830/CsaV3_5G029690/CsaV3_2G013200/CsaV3_6G001890/CsaV3_6G050000	2	CsaV3_4G026140/CsaV3_6G006480
CC	GO:0030117	membrane coat	19/980	27/2093	0.0111209	0.069996	CsaV3_2G012310/CsaV3_1G037990/CsaV3_3G026240/CsaV3_3G015830/CsaV3_2G014650/CsaV3_7G033100/CsaV3_7G000230/CsaV3_4G026140/CsaV3_4G014930/CsaV3_5G029690/CsaV3_3G031230/CsaV3_5G031710/CsaV3_5G002640/CsaV3_6G006480/CsaV3_2G013200/CsaV3_6G014610/CsaV3_6G001890/CsaV3_7G023500/CsaV3_6G050000	CsaV3_2G012310/CsaV3_1G037990/CsaV3_3G026240/CsaV3_3G015830/CsaV3_2G014650/CsaV3_7G033100/CsaV3_7G000230/CsaV3_4G026140/CsaV3_4G014930/CsaV3_5G029690/CsaV3_3G031230/CsaV3_5G031710/CsaV3_5G002640/CsaV3_6G006480/CsaV3_2G013200/CsaV3_6G014610/CsaV3_6G001890/CsaV3_7G023500/CsaV3_6G050000	19	17	CsaV3_2G012310/CsaV3_1G037990/CsaV3_3G026240/CsaV3_3G015830/CsaV3_2G014650/CsaV3_7G033100/CsaV3_7G000230/CsaV3_4G014930/CsaV3_5G029690/CsaV3_3G031230/CsaV3_5G031710/CsaV3_5G002640/CsaV3_2G013200/CsaV3_6G014610/CsaV3_6G001890/CsaV3_7G023500/CsaV3_6G050000	2	CsaV3_4G026140/CsaV3_6G006480
CC	GO:0048475	coated membrane	19/980	27/2093	0.0111209	0.069996	CsaV3_2G012310/CsaV3_1G037990/CsaV3_3G026240/CsaV3_3G015830/CsaV3_2G014650/CsaV3_7G033100/CsaV3_7G000230/CsaV3_4G026140/CsaV3_4G014930/CsaV3_5G029690/CsaV3_3G031230/CsaV3_5G031710/CsaV3_5G002640/CsaV3_6G006480/CsaV3_2G013200/CsaV3_6G014610/CsaV3_6G001890/CsaV3_7G023500/CsaV3_6G050000	CsaV3_2G012310/CsaV3_1G037990/CsaV3_3G026240/CsaV3_3G015830/CsaV3_2G014650/CsaV3_7G033100/CsaV3_7G000230/CsaV3_4G026140/CsaV3_4G014930/CsaV3_5G029690/CsaV3_3G031230/CsaV3_5G031710/CsaV3_5G002640/CsaV3_6G006480/CsaV3_2G013200/CsaV3_6G014610/CsaV3_6G001890/CsaV3_7G023500/CsaV3_6G050000	19	17	CsaV3_2G012310/CsaV3_1G037990/CsaV3_3G026240/CsaV3_3G015830/CsaV3_2G014650/CsaV3_7G033100/CsaV3_7G000230/CsaV3_4G014930/CsaV3_5G029690/CsaV3_3G031230/CsaV3_5G031710/CsaV3_5G002640/CsaV3_2G013200/CsaV3_6G014610/CsaV3_6G001890/CsaV3_7G023500/CsaV3_6G050000	2	CsaV3_4G026140/CsaV3_6G006480
CC	GO:1905368	peptidase complex	18/980	26/2093	0.0172073	0.101281	CsaV3_7G034240/CsaV3_6G006240/CsaV3_5G037190/CsaV3_2G031230/CsaV3_2G028900/CsaV3_3G013100/CsaV3_1G039080/novel.211/CsaV3_3G000690/CsaV3_5G030350/CsaV3_4G025500/CsaV3_7G001120/CsaV3_4G031710/CsaV3_3G047480/CsaV3_7G025230/CsaV3_3G009670/CsaV3_1G046270/CsaV3_6G034220	CsaV3_7G034240/CsaV3_6G006240/CsaV3_5G037190/CsaV3_2G031230/CsaV3_2G028900/CsaV3_3G013100/CsaV3_1G039080/-/CsaV3_3G000690/CsaV3_5G030350/CsaV3_4G025500/CsaV3_7G001120/CsaV3_4G031710/CsaV3_3G047480/CsaV3_7G025230/CsaV3_3G009670/CsaV3_1G046270/CsaV3_6G034220	18	15	CsaV3_7G034240/CsaV3_6G006240/CsaV3_5G037190/CsaV3_2G031230/CsaV3_2G028900/CsaV3_3G013100/novel.211/CsaV3_3G000690/CsaV3_4G025500/CsaV3_7G001120/CsaV3_4G031710/CsaV3_7G025230/CsaV3_3G009670/CsaV3_1G046270/CsaV3_6G034220	3	CsaV3_1G039080/CsaV3_5G030350/CsaV3_3G047480
CC	GO:0005794	Golgi apparatus	15/980	21/2093	0.0195759	0.101281	CsaV3_6G003740/CsaV3_2G014650/CsaV3_7G000230/CsaV3_4G026140/CsaV3_2G007260/CsaV3_3G031230/CsaV3_5G027040/CsaV3_5G000990/CsaV3_7G002510/CsaV3_6G045430/CsaV3_6G001890/CsaV3_4G035800/CsaV3_7G023500/CsaV3_6G050000/CsaV3_5G037140	CsaV3_6G003740/CsaV3_2G014650/CsaV3_7G000230/CsaV3_4G026140/CsaV3_2G007260/CsaV3_3G031230/CsaV3_5G027040/CsaV3_5G000990/CsaV3_7G002510/CsaV3_6G045430/CsaV3_6G001890/CsaV3_4G035800/CsaV3_7G023500/CsaV3_6G050000/CsaV3_5G037140	15	10	CsaV3_6G003740/CsaV3_2G014650/CsaV3_7G000230/CsaV3_3G031230/CsaV3_5G027040/CsaV3_6G001890/CsaV3_4G035800/CsaV3_7G023500/CsaV3_6G050000/CsaV3_5G037140	5	CsaV3_4G026140/CsaV3_2G007260/CsaV3_5G000990/CsaV3_7G002510/CsaV3_6G045430
CC	GO:0044431	Golgi apparatus part	15/980	21/2093	0.0195759	0.101281	CsaV3_6G003740/CsaV3_2G014650/CsaV3_7G000230/CsaV3_4G026140/CsaV3_2G007260/CsaV3_3G031230/CsaV3_5G027040/CsaV3_5G000990/CsaV3_7G002510/CsaV3_6G045430/CsaV3_6G001890/CsaV3_4G035800/CsaV3_7G023500/CsaV3_6G050000/CsaV3_5G037140	CsaV3_6G003740/CsaV3_2G014650/CsaV3_7G000230/CsaV3_4G026140/CsaV3_2G007260/CsaV3_3G031230/CsaV3_5G027040/CsaV3_5G000990/CsaV3_7G002510/CsaV3_6G045430/CsaV3_6G001890/CsaV3_4G035800/CsaV3_7G023500/CsaV3_6G050000/CsaV3_5G037140	15	10	CsaV3_6G003740/CsaV3_2G014650/CsaV3_7G000230/CsaV3_3G031230/CsaV3_5G027040/CsaV3_6G001890/CsaV3_4G035800/CsaV3_7G023500/CsaV3_6G050000/CsaV3_5G037140	5	CsaV3_4G026140/CsaV3_2G007260/CsaV3_5G000990/CsaV3_7G002510/CsaV3_6G045430
CC	GO:0098588	bounding membrane of organelle	24/980	37/2093	0.0198775	0.101281	CsaV3_2G012310/CsaV3_2G007560/CsaV3_6G003740/CsaV3_1G037990/CsaV3_2G012420/CsaV3_3G015830/CsaV3_2G014650/CsaV3_1G004130/CsaV3_7G000230/CsaV3_4G026140/CsaV3_3G009270/CsaV3_5G029690/CsaV3_2G016770/CsaV3_3G031230/CsaV3_6G005800/CsaV3_5G027040/CsaV3_6G006480/CsaV3_6G045430/CsaV3_2G013200/CsaV3_6G001890/CsaV3_7G023500/CsaV3_6G036180/CsaV3_6G050000/CsaV3_3G041720	CsaV3_2G012310/CsaV3_2G007560/CsaV3_6G003740/CsaV3_1G037990/CsaV3_2G012420/CsaV3_3G015830/CsaV3_2G014650/CsaV3_1G004130/CsaV3_7G000230/CsaV3_4G026140/CsaV3_3G009270/CsaV3_5G029690/CsaV3_2G016770/CsaV3_3G031230/CsaV3_6G005800/CsaV3_5G027040/CsaV3_6G006480/CsaV3_6G045430/CsaV3_2G013200/CsaV3_6G001890/CsaV3_7G023500/CsaV3_6G036180/CsaV3_6G050000/CsaV3_3G041720	24	19	CsaV3_2G012310/CsaV3_2G007560/CsaV3_6G003740/CsaV3_1G037990/CsaV3_3G015830/CsaV3_2G014650/CsaV3_1G004130/CsaV3_7G000230/CsaV3_5G029690/CsaV3_2G016770/CsaV3_3G031230/CsaV3_6G005800/CsaV3_5G027040/CsaV3_2G013200/CsaV3_6G001890/CsaV3_7G023500/CsaV3_6G036180/CsaV3_6G050000/CsaV3_3G041720	5	CsaV3_2G012420/CsaV3_4G026140/CsaV3_3G009270/CsaV3_6G006480/CsaV3_6G045430
CC	GO:0098805	whole membrane	20/980	30/2093	0.0219691	0.10685	CsaV3_2G012310/CsaV3_1G037990/CsaV3_2G012420/CsaV3_3G015830/CsaV3_2G014650/CsaV3_1G004130/CsaV3_7G000230/CsaV3_4G026140/CsaV3_3G009270/CsaV3_5G029690/CsaV3_2G016770/CsaV3_3G031230/CsaV3_6G005800/CsaV3_6G006480/CsaV3_2G013200/CsaV3_6G001890/CsaV3_7G023500/CsaV3_6G036180/CsaV3_6G050000/CsaV3_3G041720	CsaV3_2G012310/CsaV3_1G037990/CsaV3_2G012420/CsaV3_3G015830/CsaV3_2G014650/CsaV3_1G004130/CsaV3_7G000230/CsaV3_4G026140/CsaV3_3G009270/CsaV3_5G029690/CsaV3_2G016770/CsaV3_3G031230/CsaV3_6G005800/CsaV3_6G006480/CsaV3_2G013200/CsaV3_6G001890/CsaV3_7G023500/CsaV3_6G036180/CsaV3_6G050000/CsaV3_3G041720	20	16	CsaV3_2G012310/CsaV3_1G037990/CsaV3_3G015830/CsaV3_2G014650/CsaV3_1G004130/CsaV3_7G000230/CsaV3_5G029690/CsaV3_2G016770/CsaV3_3G031230/CsaV3_6G005800/CsaV3_2G013200/CsaV3_6G001890/CsaV3_7G023500/CsaV3_6G036180/CsaV3_6G050000/CsaV3_3G041720	4	CsaV3_2G012420/CsaV3_4G026140/CsaV3_3G009270/CsaV3_6G006480
MF	GO:0005198	structural molecule activity	127/4104	212/8681	0.000125282	0.0349536	CsaV3_3G031360/CsaV3_4G007890/CsaV3_4G031980/CsaV3_4G005150/CsaV3_6G022450/CsaV3_3G035560/CsaV3_3G012980/CsaV3_5G031430/CsaV3_7G021070/CsaV3_2G012470/CsaV3_3G007620/CsaV3_6G038790/CsaV3_5G038460/CsaV3_7G007910/CsaV3_3G039740/CsaV3_4G008470/novel.376/CsaV3_6G002260/CsaV3_3G044840/CsaV3_2G032240/CsaV3_6G041770/CsaV3_6G046990/CsaV3_6G007430/CsaV3_4G011770/CsaV3_6G032270/CsaV3_7G031330/CsaV3_3G037470…	CsaV3_3G031360/CsaV3_4G007890/CsaV3_4G031980/CsaV3_4G005150/CsaV3_6G022450/CsaV3_3G035560/CsaV3_3G012980/CsaV3_5G031430/CsaV3_7G021070/CsaV3_2G012470/CsaV3_3G007620/CsaV3_6G038790/CsaV3_5G038460/CsaV3_7G007910/CsaV3_3G039740/CsaV3_4G008470/-/CsaV3_6G002260/CsaV3_3G044840/CsaV3_2G032240/CsaV3_6G041770/CsaV3_6G046990/CsaV3_6G007430/CsaV3_4G011770/CsaV3_6G032270/CsaV3_7G031330/CsaV3_3G037470/CsaV3_3…	127	29	CsaV3_6G038790/CsaV3_3G044840/CsaV3_6G041770/CsaV3_3G040630/CsaV3_3G028630/CsaV3_6G050190/CsaV3_3G026240/CsaV3_2G014650/CsaV3_7G033100/CsaV3_7G000230/CsaV3_4G001790/CsaV3_5G001160/CsaV3_3G031230/CsaV3_4G034910/CsaV3_5G001490/CsaV3_2G008470/CsaV3_2G004560/CsaV3_6G002760/CsaV3_6G006340/CsaV3_6G001890/CsaV3_4G009970/CsaV3_2G018130/CsaV3_6G016380/CsaV3_7G023500/CsaV3_6G050000/CsaV3_5G001000/CsaV3_7G0…	98	CsaV3_3G031360/CsaV3_4G007890/CsaV3_4G031980/CsaV3_4G005150/CsaV3_6G022450/CsaV3_3G035560/CsaV3_3G012980/CsaV3_5G031430/CsaV3_7G021070/CsaV3_2G012470/CsaV3_3G007620/CsaV3_5G038460/CsaV3_7G007910/CsaV3_3G039740/CsaV3_4G008470/novel.376/CsaV3_6G002260/CsaV3_2G032240/CsaV3_6G046990/CsaV3_6G007430/CsaV3_4G011770/CsaV3_6G032270/CsaV3_7G031330/CsaV3_3G037470/CsaV3_3G035780/CsaV3_3G011980/CsaV3_7G008490…
MF	GO:0003735	structural constituent of ribosome	117/4104	198/8681	0.000487774	0.0680444	CsaV3_3G031360/CsaV3_4G007890/CsaV3_4G031980/CsaV3_4G005150/CsaV3_6G022450/CsaV3_3G035560/CsaV3_3G012980/CsaV3_5G031430/CsaV3_7G021070/CsaV3_2G012470/CsaV3_3G007620/CsaV3_5G038460/CsaV3_7G007910/CsaV3_3G039740/CsaV3_4G008470/novel.376/CsaV3_6G002260/CsaV3_3G044840/CsaV3_2G032240/CsaV3_6G041770/CsaV3_6G046990/CsaV3_6G007430/CsaV3_4G011770/CsaV3_6G032270/CsaV3_7G031330/CsaV3_3G037470/CsaV3_3G035780…	CsaV3_3G031360/CsaV3_4G007890/CsaV3_4G031980/CsaV3_4G005150/CsaV3_6G022450/CsaV3_3G035560/CsaV3_3G012980/CsaV3_5G031430/CsaV3_7G021070/CsaV3_2G012470/CsaV3_3G007620/CsaV3_5G038460/CsaV3_7G007910/CsaV3_3G039740/CsaV3_4G008470/-/CsaV3_6G002260/CsaV3_3G044840/CsaV3_2G032240/CsaV3_6G041770/CsaV3_6G046990/CsaV3_6G007430/CsaV3_4G011770/CsaV3_6G032270/CsaV3_7G031330/CsaV3_3G037470/CsaV3_3G035780/CsaV3_3…	117	20	CsaV3_3G044840/CsaV3_6G041770/CsaV3_3G040630/CsaV3_3G028630/CsaV3_6G050190/CsaV3_4G001790/CsaV3_5G001160/CsaV3_4G034910/CsaV3_5G001490/CsaV3_2G008470/CsaV3_2G004560/CsaV3_6G002760/CsaV3_6G006340/CsaV3_4G009970/CsaV3_2G018130/CsaV3_6G016380/CsaV3_5G001000/CsaV3_7G003660/CsaV3_4G031960/CsaV3_3G030390	97	CsaV3_3G031360/CsaV3_4G007890/CsaV3_4G031980/CsaV3_4G005150/CsaV3_6G022450/CsaV3_3G035560/CsaV3_3G012980/CsaV3_5G031430/CsaV3_7G021070/CsaV3_2G012470/CsaV3_3G007620/CsaV3_5G038460/CsaV3_7G007910/CsaV3_3G039740/CsaV3_4G008470/novel.376/CsaV3_6G002260/CsaV3_2G032240/CsaV3_6G046990/CsaV3_6G007430/CsaV3_4G011770/CsaV3_6G032270/CsaV3_7G031330/CsaV3_3G037470/CsaV3_3G035780/CsaV3_3G011980/CsaV3_7G008490…
MF	GO:0003743	translation initiation factor activity	18/4104	23/8681	0.00242223	0.225268	CsaV3_7G021830/CsaV3_1G023010/CsaV3_3G005110/CsaV3_7G000840/CsaV3_7G003720/CsaV3_1G040520/CsaV3_2G012490/CsaV3_7G022370/CsaV3_2G015740/CsaV3_2G024990/CsaV3_2G033280/CsaV3_1G014460/CsaV3_2G015760/CsaV3_2G016200/CsaV3_5G024250/CsaV3_4G033730/CsaV3_7G003030/CsaV3_3G048680	CsaV3_7G021830/CsaV3_1G023010/CsaV3_3G005110/CsaV3_7G000840/CsaV3_7G003720/CsaV3_1G040520/CsaV3_2G012490/CsaV3_7G022370/CsaV3_2G015740/CsaV3_2G024990/CsaV3_2G033280/CsaV3_1G014460/CsaV3_2G015760/CsaV3_2G016200/CsaV3_5G024250/CsaV3_4G033730/CsaV3_7G003030/CsaV3_3G048680	18	10	CsaV3_7G021830/CsaV3_3G005110/CsaV3_7G003720/CsaV3_7G022370/CsaV3_2G033280/CsaV3_2G016200/CsaV3_5G024250/CsaV3_4G033730/CsaV3_7G003030/CsaV3_3G048680	8	CsaV3_1G023010/CsaV3_7G000840/CsaV3_1G040520/CsaV3_2G012490/CsaV3_2G015740/CsaV3_2G024990/CsaV3_1G014460/CsaV3_2G015760
MF	GO:0015103	inorganic anion transmembrane transporter activity	17/4104	22/8681	0.00407517	0.284243	CsaV3_7G027830/CsaV3_7G033120/CsaV3_2G003210/CsaV3_1G030670/CsaV3_6G043870/CsaV3_7G032820/CsaV3_3G006610/CsaV3_2G031590/CsaV3_6G052220/CsaV3_5G026240/CsaV3_1G030710/CsaV3_5G000350/CsaV3_UNG188490/CsaV3_5G013270/CsaV3_4G004820/CsaV3_6G009920/CsaV3_3G003830	CsaV3_7G027830/CsaV3_7G033120/CsaV3_2G003210/CsaV3_1G030670/CsaV3_6G043870/CsaV3_7G032820/CsaV3_3G006610/CsaV3_2G031590/CsaV3_6G052220/CsaV3_5G026240/CsaV3_1G030710/CsaV3_5G000350/CsaV3_UNG188490/CsaV3_5G013270/CsaV3_4G004820/CsaV3_6G009920/CsaV3_3G003830	17	9	CsaV3_7G033120/CsaV3_6G043870/CsaV3_3G006610/CsaV3_2G031590/CsaV3_6G052220/CsaV3_5G026240/CsaV3_UNG188490/CsaV3_4G004820/CsaV3_3G003830	8	CsaV3_7G027830/CsaV3_2G003210/CsaV3_1G030670/CsaV3_7G032820/CsaV3_1G030710/CsaV3_5G000350/CsaV3_5G013270/CsaV3_6G009920
MF	GO:0004175	endopeptidase activity	60/4104	102/8681	0.0122172	0.68172	CsaV3_3G043370/CsaV3_3G016510/CsaV3_6G043840/CsaV3_4G037130/CsaV3_5G013690/CsaV3_7G034030/CsaV3_4G008810/CsaV3_1G041110/CsaV3_4G037050/CsaV3_4G030510/CsaV3_4G006700/CsaV3_3G046020/CsaV3_7G005790/CsaV3_5G037190/CsaV3_5G004660/CsaV3_6G016700/CsaV3_2G031230/CsaV3_4G025100/CsaV3_2G028900/CsaV3_7G002320/CsaV3_1G046090/CsaV3_3G048450/CsaV3_2G026250/CsaV3_3G013100/CsaV3_4G012000/CsaV3_5G008530/novel.211…	CsaV3_3G043370/CsaV3_3G016510/CsaV3_6G043840/CsaV3_4G037130/CsaV3_5G013690/CsaV3_7G034030/CsaV3_4G008810/CsaV3_1G041110/CsaV3_4G037050/CsaV3_4G030510/CsaV3_4G006700/CsaV3_3G046020/CsaV3_7G005790/CsaV3_5G037190/CsaV3_5G004660/CsaV3_6G016700/CsaV3_2G031230/CsaV3_4G025100/CsaV3_2G028900/CsaV3_7G002320/CsaV3_1G046090/CsaV3_3G048450/CsaV3_2G026250/CsaV3_3G013100/CsaV3_4G012000/CsaV3_5G008530/-/CsaV3_4…	60	33	CsaV3_4G037130/CsaV3_5G013690/CsaV3_4G037050/CsaV3_4G030510/CsaV3_4G006700/CsaV3_3G046020/CsaV3_7G005790/CsaV3_5G037190/CsaV3_6G016700/CsaV3_2G031230/CsaV3_4G025100/CsaV3_2G028900/CsaV3_3G048450/CsaV3_3G013100/novel.211/CsaV3_3G008710/CsaV3_3G000690/CsaV3_3G002090/CsaV3_4G025500/CsaV3_4G031710/CsaV3_4G008500/CsaV3_1G036040/CsaV3_7G025230/CsaV3_1G045170/CsaV3_7G021370/CsaV3_3G009670/CsaV3_2G007040…	27	CsaV3_3G043370/CsaV3_3G016510/CsaV3_6G043840/CsaV3_7G034030/CsaV3_4G008810/CsaV3_1G041110/CsaV3_5G004660/CsaV3_7G002320/CsaV3_1G046090/CsaV3_2G026250/CsaV3_4G012000/CsaV3_5G008530/CsaV3_4G029070/CsaV3_3G016260/CsaV3_2G026160/CsaV3_7G034370/CsaV3_2G034890/CsaV3_6G000590/CsaV3_5G000640/CsaV3_2G015990/CsaV3_6G006800/CsaV3_4G005900/CsaV3_5G025440/CsaV3_6G035840/CsaV3_6G003030/CsaV3_3G047430/CsaV3_3G0…
MF	GO:0008483	transaminase activity	805240	2477016	0.0214685	0.855675	CsaV3_7G032040/CsaV3_4G026970/CsaV3_1G031330/CsaV3_7G007260/CsaV3_UNG183400/CsaV3_3G033240/CsaV3_4G007370/CsaV3_4G004900/CsaV3_4G007380	CsaV3_7G032040/CsaV3_4G026970/CsaV3_1G031330/CsaV3_7G007260/CsaV3_UNG183400/CsaV3_3G033240/CsaV3_4G007370/CsaV3_4G004900/CsaV3_4G007380	9	6	CsaV3_7G032040/CsaV3_4G026970/CsaV3_1G031330/CsaV3_7G007260/CsaV3_4G007370/CsaV3_4G007380	3	CsaV3_UNG183400/CsaV3_3G033240/CsaV3_4G004900
MF	GO:0016769	transferase activity, transferring nitrogenous groups	805240	2477016	0.0214685	0.855675	CsaV3_7G032040/CsaV3_4G026970/CsaV3_1G031330/CsaV3_7G007260/CsaV3_UNG183400/CsaV3_3G033240/CsaV3_4G007370/CsaV3_4G004900/CsaV3_4G007380	CsaV3_7G032040/CsaV3_4G026970/CsaV3_1G031330/CsaV3_7G007260/CsaV3_UNG183400/CsaV3_3G033240/CsaV3_4G007370/CsaV3_4G004900/CsaV3_4G007380	9	6	CsaV3_7G032040/CsaV3_4G026970/CsaV3_1G031330/CsaV3_7G007260/CsaV3_4G007370/CsaV3_4G007380	3	CsaV3_UNG183400/CsaV3_3G033240/CsaV3_4G004900
MF	GO:0008171	O-methyltransferase activity	13/4104	18/8681	0.0288967	0.927249	CsaV3_7G025280/CsaV3_3G004010/CsaV3_1G000080/CsaV3_3G004020/CsaV3_6G013080/CsaV3_1G000930/CsaV3_7G003200/CsaV3_7G001400/CsaV3_5G030330/CsaV3_3G004000/CsaV3_4G008590/CsaV3_7G003180/CsaV3_2G034540	CsaV3_7G025280/CsaV3_3G004010/CsaV3_1G000080/CsaV3_3G004020/CsaV3_6G013080/CsaV3_1G000930/CsaV3_7G003200/CsaV3_7G001400/CsaV3_5G030330/CsaV3_3G004000/CsaV3_4G008590/CsaV3_7G003180/CsaV3_2G034540	13	7	CsaV3_7G025280/CsaV3_3G004010/CsaV3_3G004020/CsaV3_1G000930/CsaV3_5G030330/CsaV3_3G004000/CsaV3_7G003180	6	CsaV3_1G000080/CsaV3_6G013080/CsaV3_7G003200/CsaV3_7G001400/CsaV3_4G008590/CsaV3_2G034540
MF	GO:0031072	heat shock protein binding	805270	13/8681	0.0299113	0.927249	CsaV3_4G008850/CsaV3_1G044020/CsaV3_4G001970/CsaV3_2G002680/CsaV3_7G031320/CsaV3_6G006540/CsaV3_5G035180/CsaV3_4G023550/CsaV3_2G002870/CsaV3_3G046470	CsaV3_4G008850/CsaV3_1G044020/CsaV3_4G001970/CsaV3_2G002680/CsaV3_7G031320/CsaV3_6G006540/CsaV3_5G035180/CsaV3_4G023550/CsaV3_2G002870/CsaV3_3G046470	10	5	CsaV3_4G008850/CsaV3_1G044020/CsaV3_4G001970/CsaV3_7G031320/CsaV3_6G006540	5	CsaV3_2G002680/CsaV3_5G035180/CsaV3_4G023550/CsaV3_2G002870/CsaV3_3G046470
MF	GO:0008135	translation factor activity, RNA binding	25/4104	40/8681	0.0378636	0.961449	CsaV3_7G021830/CsaV3_1G009580/CsaV3_1G023010/CsaV3_3G005110/CsaV3_1G028950/CsaV3_7G000840/CsaV3_4G036580/CsaV3_7G003720/CsaV3_1G040520/CsaV3_2G012490/CsaV3_7G022370/CsaV3_2G015740/CsaV3_3G017730/CsaV3_2G024990/CsaV3_2G033280/CsaV3_1G014460/CsaV3_2G015760/CsaV3_2G016200/CsaV3_5G024250/CsaV3_4G033730/CsaV3_3G033100/CsaV3_3G006520/CsaV3_7G003030/CsaV3_3G006530/CsaV3_3G048680	CsaV3_7G021830/CsaV3_1G009580/CsaV3_1G023010/CsaV3_3G005110/CsaV3_1G028950/CsaV3_7G000840/CsaV3_4G036580/CsaV3_7G003720/CsaV3_1G040520/CsaV3_2G012490/CsaV3_7G022370/CsaV3_2G015740/CsaV3_3G017730/CsaV3_2G024990/CsaV3_2G033280/CsaV3_1G014460/CsaV3_2G015760/CsaV3_2G016200/CsaV3_5G024250/CsaV3_4G033730/CsaV3_3G033100/CsaV3_3G006520/CsaV3_7G003030/CsaV3_3G006530/CsaV3_3G048680	25	14	CsaV3_7G021830/CsaV3_3G005110/CsaV3_1G028950/CsaV3_7G003720/CsaV3_7G022370/CsaV3_3G017730/CsaV3_2G033280/CsaV3_2G016200/CsaV3_5G024250/CsaV3_4G033730/CsaV3_3G033100/CsaV3_7G003030/CsaV3_3G006530/CsaV3_3G048680	11	CsaV3_1G009580/CsaV3_1G023010/CsaV3_7G000840/CsaV3_4G036580/CsaV3_1G040520/CsaV3_2G012490/CsaV3_2G015740/CsaV3_2G024990/CsaV3_1G014460/CsaV3_2G015760/CsaV3_3G006520
MF	GO:0008276	protein methyltransferase activity	805209	2476985	0.0379066	0.961449	CsaV3_3G011580/CsaV3_4G031740/CsaV3_3G027790/CsaV3_1G000930/CsaV3_6G042640/CsaV3_3G002320/CsaV3_6G007420/CsaV3_3G040650	CsaV3_3G011580/CsaV3_4G031740/CsaV3_3G027790/CsaV3_1G000930/CsaV3_6G042640/CsaV3_3G002320/CsaV3_6G007420/CsaV3_3G040650	8	5	CsaV3_4G031740/CsaV3_1G000930/CsaV3_6G042640/CsaV3_3G002320/CsaV3_6G007420	3	CsaV3_3G011580/CsaV3_3G027790/CsaV3_3G040650
MF	GO:0010181	FMN binding	805331	17/8681	0.0454358	0.995258	CsaV3_5G037490/CsaV3_3G010780/CsaV3_4G037360/CsaV3_5G017240/CsaV3_3G007930/CsaV3_3G017550/CsaV3_5G026510/CsaV3_2G008410/CsaV3_3G047810/CsaV3_1G040870/CsaV3_1G031610/CsaV3_7G006670	CsaV3_5G037490/CsaV3_3G010780/CsaV3_4G037360/CsaV3_5G017240/CsaV3_3G007930/CsaV3_3G017550/CsaV3_5G026510/CsaV3_2G008410/CsaV3_3G047810/CsaV3_1G040870/CsaV3_1G031610/CsaV3_7G006670	12	7	CsaV3_3G010780/CsaV3_5G017240/CsaV3_3G007930/CsaV3_3G017550/CsaV3_5G026510/CsaV3_3G047810/CsaV3_1G031610	5	CsaV3_5G037490/CsaV3_4G037360/CsaV3_2G008410/CsaV3_1G040870/CsaV3_7G006670
MF	GO:0016879	ligase activity, forming carbon-nitrogen bonds	17/4104	26/8681	0.0486134	0.995258	CsaV3_6G040120/CsaV3_6G053210/CsaV3_3G021030/CsaV3_1G000670/CsaV3_5G002830/CsaV3_5G002770/CsaV3_7G023220/CsaV3_4G031360/CsaV3_2G012390/CsaV3_3G033280/CsaV3_1G009560/CsaV3_1G042270/CsaV3_6G016090/CsaV3_5G023920/CsaV3_6G045440/CsaV3_3G006560/CsaV3_1G009540	CsaV3_6G040120/CsaV3_6G053210/CsaV3_3G021030/CsaV3_1G000670/CsaV3_5G002830/CsaV3_5G002770/CsaV3_7G023220/CsaV3_4G031360/CsaV3_2G012390/CsaV3_3G033280/CsaV3_1G009560/CsaV3_1G042270/CsaV3_6G016090/CsaV3_5G023920/CsaV3_6G045440/CsaV3_3G006560/CsaV3_1G009540	17	8	CsaV3_6G040120/CsaV3_5G002830/CsaV3_4G031360/CsaV3_3G033280/CsaV3_1G009560/CsaV3_5G023920/CsaV3_6G045440/CsaV3_3G006560	9	CsaV3_6G053210/CsaV3_3G021030/CsaV3_1G000670/CsaV3_5G002770/CsaV3_7G023220/CsaV3_2G012390/CsaV3_1G042270/CsaV3_6G016090/CsaV3_1G009540
MF	GO:0008138	protein tyrosine/serine/threonine phosphatase activity	805240	2477046	0.0499434	0.995258	CsaV3_5G010760/CsaV3_1G000110/CsaV3_2G001720/CsaV3_4G025970/CsaV3_5G006730/CsaV3_6G037850/CsaV3_6G018610/CsaV3_5G030970/CsaV3_3G042460	CsaV3_5G010760/CsaV3_1G000110/CsaV3_2G001720/CsaV3_4G025970/CsaV3_5G006730/CsaV3_6G037850/CsaV3_6G018610/CsaV3_5G030970/CsaV3_3G042460	9	6	CsaV3_5G010760/CsaV3_1G000110/CsaV3_4G025970/CsaV3_6G037850/CsaV3_5G030970/CsaV3_3G042460	3	CsaV3_2G001720/CsaV3_5G006730/CsaV3_6G018610

## Sheet: XS_common GO
Category	GOID	Description	GeneRatio	BgRatio	pvalue	padj	geneID	geneName	Count
BP	GO:0006412	translation	152/2174	271/6278	1.26887e-13	3.6831e-11	CsaV3_1G002290/CsaV3_1G002460/CsaV3_1G003150/CsaV3_1G003660/CsaV3_1G003930/CsaV3_1G006670/CsaV3_1G009300/CsaV3_1G012830/CsaV3_1G014020/CsaV3_1G021840/CsaV3_1G023010/CsaV3_1G028950/CsaV3_1G029200/CsaV3_1G032610/CsaV3_1G032670/CsaV3_1G032790/CsaV3_1G033650/CsaV3_1G038230/CsaV3_1G038800/CsaV3_1G039630/CsaV3_1G045700/CsaV3_2G001240/CsaV3_2G001620/CsaV3_2G004340/CsaV3_2G008510/CsaV3_2G012470/CsaV3_2G0…	CsaV3_1G002290/CsaV3_1G002460/CsaV3_1G003150/CsaV3_1G003660/CsaV3_1G003930/CsaV3_1G006670/CsaV3_1G009300/CsaV3_1G012830/CsaV3_1G014020/CsaV3_1G021840/CsaV3_1G023010/CsaV3_1G028950/CsaV3_1G029200/CsaV3_1G032610/CsaV3_1G032670/CsaV3_1G032790/CsaV3_1G033650/CsaV3_1G038230/CsaV3_1G038800/CsaV3_1G039630/CsaV3_1G045700/CsaV3_2G001240/CsaV3_2G001620/CsaV3_2G004340/CsaV3_2G008510/CsaV3_2G012470/CsaV3_2G0…	152
BP	GO:0043043	peptide biosynthetic process	153/2174	274/6278	1.73322e-13	3.6831e-11	CsaV3_1G002290/CsaV3_1G002460/CsaV3_1G003150/CsaV3_1G003660/CsaV3_1G003930/CsaV3_1G006670/CsaV3_1G009300/CsaV3_1G012830/CsaV3_1G014020/CsaV3_1G021840/CsaV3_1G023010/CsaV3_1G028950/CsaV3_1G029200/CsaV3_1G032610/CsaV3_1G032670/CsaV3_1G032790/CsaV3_1G033650/CsaV3_1G038230/CsaV3_1G038800/CsaV3_1G039630/CsaV3_1G045700/CsaV3_2G001240/CsaV3_2G001620/CsaV3_2G004340/CsaV3_2G008510/CsaV3_2G012470/CsaV3_2G0…	CsaV3_1G002290/CsaV3_1G002460/CsaV3_1G003150/CsaV3_1G003660/CsaV3_1G003930/CsaV3_1G006670/CsaV3_1G009300/CsaV3_1G012830/CsaV3_1G014020/CsaV3_1G021840/CsaV3_1G023010/CsaV3_1G028950/CsaV3_1G029200/CsaV3_1G032610/CsaV3_1G032670/CsaV3_1G032790/CsaV3_1G033650/CsaV3_1G038230/CsaV3_1G038800/CsaV3_1G039630/CsaV3_1G045700/CsaV3_2G001240/CsaV3_2G001620/CsaV3_2G004340/CsaV3_2G008510/CsaV3_2G012470/CsaV3_2G0…	153
BP	GO:0006518	peptide metabolic process	155/2174	281/6278	4.71629e-13	6.009e-11	CsaV3_1G002290/CsaV3_1G002460/CsaV3_1G003150/CsaV3_1G003660/CsaV3_1G003930/CsaV3_1G006670/CsaV3_1G009300/CsaV3_1G012830/CsaV3_1G014020/CsaV3_1G021840/CsaV3_1G023010/CsaV3_1G028950/CsaV3_1G029200/CsaV3_1G032610/CsaV3_1G032670/CsaV3_1G032790/CsaV3_1G033650/CsaV3_1G038230/CsaV3_1G038800/CsaV3_1G039630/CsaV3_1G045700/CsaV3_2G001240/CsaV3_2G001620/CsaV3_2G001680/CsaV3_2G004340/CsaV3_2G008510/CsaV3_2G0…	CsaV3_1G002290/CsaV3_1G002460/CsaV3_1G003150/CsaV3_1G003660/CsaV3_1G003930/CsaV3_1G006670/CsaV3_1G009300/CsaV3_1G012830/CsaV3_1G014020/CsaV3_1G021840/CsaV3_1G023010/CsaV3_1G028950/CsaV3_1G029200/CsaV3_1G032610/CsaV3_1G032670/CsaV3_1G032790/CsaV3_1G033650/CsaV3_1G038230/CsaV3_1G038800/CsaV3_1G039630/CsaV3_1G045700/CsaV3_2G001240/CsaV3_2G001620/CsaV3_2G001680/CsaV3_2G004340/CsaV3_2G008510/CsaV3_2G0…	155
BP	GO:0043604	amide biosynthetic process	157/2174	286/6278	5.65553e-13	6.009e-11	CsaV3_1G002290/CsaV3_1G002460/CsaV3_1G003150/CsaV3_1G003660/CsaV3_1G003930/CsaV3_1G006670/CsaV3_1G009300/CsaV3_1G012830/CsaV3_1G014020/CsaV3_1G021840/CsaV3_1G023010/CsaV3_1G028950/CsaV3_1G029200/CsaV3_1G032610/CsaV3_1G032670/CsaV3_1G032790/CsaV3_1G033650/CsaV3_1G038230/CsaV3_1G038800/CsaV3_1G039630/CsaV3_1G045700/CsaV3_2G001240/CsaV3_2G001620/CsaV3_2G004340/CsaV3_2G008510/CsaV3_2G012470/CsaV3_2G0…	CsaV3_1G002290/CsaV3_1G002460/CsaV3_1G003150/CsaV3_1G003660/CsaV3_1G003930/CsaV3_1G006670/CsaV3_1G009300/CsaV3_1G012830/CsaV3_1G014020/CsaV3_1G021840/CsaV3_1G023010/CsaV3_1G028950/CsaV3_1G029200/CsaV3_1G032610/CsaV3_1G032670/CsaV3_1G032790/CsaV3_1G033650/CsaV3_1G038230/CsaV3_1G038800/CsaV3_1G039630/CsaV3_1G045700/CsaV3_2G001240/CsaV3_2G001620/CsaV3_2G004340/CsaV3_2G008510/CsaV3_2G012470/CsaV3_2G0…	157
BP	GO:0043603	cellular amide metabolic process	160/2174	297/6278	2.70834e-12	2.30209e-10	CsaV3_1G002290/CsaV3_1G002460/CsaV3_1G003150/CsaV3_1G003660/CsaV3_1G003930/CsaV3_1G006670/CsaV3_1G009300/CsaV3_1G012830/CsaV3_1G014020/CsaV3_1G021840/CsaV3_1G023010/CsaV3_1G028950/CsaV3_1G029200/CsaV3_1G032610/CsaV3_1G032670/CsaV3_1G032790/CsaV3_1G033650/CsaV3_1G038230/CsaV3_1G038800/CsaV3_1G039630/CsaV3_1G045700/CsaV3_2G001240/CsaV3_2G001620/CsaV3_2G001680/CsaV3_2G004340/CsaV3_2G008510/CsaV3_2G0…	CsaV3_1G002290/CsaV3_1G002460/CsaV3_1G003150/CsaV3_1G003660/CsaV3_1G003930/CsaV3_1G006670/CsaV3_1G009300/CsaV3_1G012830/CsaV3_1G014020/CsaV3_1G021840/CsaV3_1G023010/CsaV3_1G028950/CsaV3_1G029200/CsaV3_1G032610/CsaV3_1G032670/CsaV3_1G032790/CsaV3_1G033650/CsaV3_1G038230/CsaV3_1G038800/CsaV3_1G039630/CsaV3_1G045700/CsaV3_2G001240/CsaV3_2G001620/CsaV3_2G001680/CsaV3_2G004340/CsaV3_2G008510/CsaV3_2G0…	160
BP	GO:1901566	organonitrogen compound biosynthetic process	239/2174	488/6278	7.80317e-12	5.52725e-10	CsaV3_1G000080/CsaV3_1G000670/CsaV3_1G002290/CsaV3_1G002460/CsaV3_1G003090/CsaV3_1G003150/CsaV3_1G003170/CsaV3_1G003660/CsaV3_1G003930/CsaV3_1G005960/CsaV3_1G006670/CsaV3_1G008060/CsaV3_1G008930/CsaV3_1G009300/CsaV3_1G010170/CsaV3_1G010720/CsaV3_1G012830/CsaV3_1G014020/CsaV3_1G021840/CsaV3_1G022990/CsaV3_1G023010/CsaV3_1G024100/CsaV3_1G028580/CsaV3_1G028950/CsaV3_1G029200/CsaV3_1G031480/CsaV3_1G0…	CsaV3_1G000080/CsaV3_1G000670/CsaV3_1G002290/CsaV3_1G002460/CsaV3_1G003090/CsaV3_1G003150/CsaV3_1G003170/CsaV3_1G003660/CsaV3_1G003930/CsaV3_1G005960/CsaV3_1G006670/CsaV3_1G008060/CsaV3_1G008930/CsaV3_1G009300/CsaV3_1G010170/CsaV3_1G010720/CsaV3_1G012830/CsaV3_1G014020/CsaV3_1G021840/CsaV3_1G022990/CsaV3_1G023010/CsaV3_1G024100/CsaV3_1G028580/CsaV3_1G028950/CsaV3_1G029200/CsaV3_1G031480/CsaV3_1G0…	239
BP	GO:0006260	DNA replication	35/2174	46/6278	9.88641e-09	6.00247e-07	CsaV3_1G002970/CsaV3_1G006150/CsaV3_2G003500/CsaV3_2G003690/CsaV3_2G010800/CsaV3_2G016060/CsaV3_2G028020/CsaV3_2G031090/CsaV3_3G001070/CsaV3_3G003530/CsaV3_3G006750/CsaV3_3G019190/CsaV3_3G037350/CsaV3_3G038830/CsaV3_4G007230/CsaV3_4G012080/CsaV3_4G012090/CsaV3_4G012100/CsaV3_4G028050/CsaV3_4G031600/CsaV3_4G033030/CsaV3_5G005010/CsaV3_5G005690/CsaV3_5G035370/CsaV3_5G039570/CsaV3_6G008170/CsaV3_6G0…	CsaV3_1G002970/CsaV3_1G006150/CsaV3_2G003500/CsaV3_2G003690/CsaV3_2G010800/CsaV3_2G016060/CsaV3_2G028020/CsaV3_2G031090/CsaV3_3G001070/CsaV3_3G003530/CsaV3_3G006750/CsaV3_3G019190/CsaV3_3G037350/CsaV3_3G038830/CsaV3_4G007230/CsaV3_4G012080/CsaV3_4G012090/CsaV3_4G012100/CsaV3_4G028050/CsaV3_4G031600/CsaV3_4G033030/CsaV3_5G005010/CsaV3_5G005690/CsaV3_5G035370/CsaV3_5G039570/CsaV3_6G008170/CsaV3_6G0…	35
BP	GO:0006259	DNA metabolic process	68/2174	126/6278	5.48027e-06	0.000291139	CsaV3_1G002970/CsaV3_1G003630/CsaV3_1G006150/CsaV3_1G008250/CsaV3_1G032850/CsaV3_1G038240/CsaV3_2G001430/CsaV3_2G002320/CsaV3_2G003500/CsaV3_2G003690/CsaV3_2G009350/CsaV3_2G010800/CsaV3_2G016060/CsaV3_2G022190/CsaV3_2G028020/CsaV3_2G031090/CsaV3_2G031500/CsaV3_3G000200/CsaV3_3G001070/CsaV3_3G003530/CsaV3_3G006750/CsaV3_3G009680/CsaV3_3G019190/CsaV3_3G032050/CsaV3_3G032680/CsaV3_3G033440/CsaV3_3G0…	CsaV3_1G002970/CsaV3_1G003630/CsaV3_1G006150/CsaV3_1G008250/CsaV3_1G032850/CsaV3_1G038240/CsaV3_2G001430/CsaV3_2G002320/CsaV3_2G003500/CsaV3_2G003690/CsaV3_2G009350/CsaV3_2G010800/CsaV3_2G016060/CsaV3_2G022190/CsaV3_2G028020/CsaV3_2G031090/CsaV3_2G031500/CsaV3_3G000200/CsaV3_3G001070/CsaV3_3G003530/CsaV3_3G006750/CsaV3_3G009680/CsaV3_3G019190/CsaV3_3G032050/CsaV3_3G032680/CsaV3_3G033440/CsaV3_3G0…	68
BP	GO:0007017	microtubule-based process	38/2174	64/6278	4.18475e-05	0.00197613	CsaV3_1G003530/CsaV3_1G004510/CsaV3_1G006890/CsaV3_1G008070/CsaV3_1G011320/CsaV3_1G024160/CsaV3_1G033760/CsaV3_1G043050/CsaV3_2G005260/CsaV3_2G012640/CsaV3_2G014220/CsaV3_2G015170/CsaV3_2G025940/CsaV3_2G029620/CsaV3_3G003930/CsaV3_3G004460/CsaV3_3G015910/CsaV3_3G034500/CsaV3_3G037420/CsaV3_3G047980/CsaV3_4G001020/CsaV3_4G005820/CsaV3_4G007670/CsaV3_4G010070/CsaV3_4G031280/CsaV3_4G034600/CsaV3_5G0…	CsaV3_1G003530/CsaV3_1G004510/CsaV3_1G006890/CsaV3_1G008070/CsaV3_1G011320/CsaV3_1G024160/CsaV3_1G033760/CsaV3_1G043050/CsaV3_2G005260/CsaV3_2G012640/CsaV3_2G014220/CsaV3_2G015170/CsaV3_2G025940/CsaV3_2G029620/CsaV3_3G003930/CsaV3_3G004460/CsaV3_3G015910/CsaV3_3G034500/CsaV3_3G037420/CsaV3_3G047980/CsaV3_4G001020/CsaV3_4G005820/CsaV3_4G007670/CsaV3_4G010070/CsaV3_4G031280/CsaV3_4G034600/CsaV3_5G0…	38
BP	GO:0006928	movement of cell or subcellular component	29/2174	48/6278	0.000221123	0.00854337	CsaV3_1G003530/CsaV3_1G004510/CsaV3_1G006890/CsaV3_1G011320/CsaV3_1G024160/CsaV3_1G033760/CsaV3_2G005260/CsaV3_2G012640/CsaV3_2G014220/CsaV3_2G015170/CsaV3_2G025940/CsaV3_2G029620/CsaV3_3G004460/CsaV3_3G015910/CsaV3_3G037420/CsaV3_3G047980/CsaV3_4G001020/CsaV3_4G005820/CsaV3_4G007670/CsaV3_4G034600/CsaV3_5G002790/CsaV3_5G003600/CsaV3_5G004730/CsaV3_6G000140/CsaV3_6G034290/CsaV3_6G045040/CsaV3_7G0…	CsaV3_1G003530/CsaV3_1G004510/CsaV3_1G006890/CsaV3_1G011320/CsaV3_1G024160/CsaV3_1G033760/CsaV3_2G005260/CsaV3_2G012640/CsaV3_2G014220/CsaV3_2G015170/CsaV3_2G025940/CsaV3_2G029620/CsaV3_3G004460/CsaV3_3G015910/CsaV3_3G037420/CsaV3_3G047980/CsaV3_4G001020/CsaV3_4G005820/CsaV3_4G007670/CsaV3_4G034600/CsaV3_5G002790/CsaV3_5G003600/CsaV3_5G004730/CsaV3_6G000140/CsaV3_6G034290/CsaV3_6G045040/CsaV3_7G0…	29
BP	GO:0007018	microtubule-based movement	29/2174	48/6278	0.000221123	0.00854337	CsaV3_1G003530/CsaV3_1G004510/CsaV3_1G006890/CsaV3_1G011320/CsaV3_1G024160/CsaV3_1G033760/CsaV3_2G005260/CsaV3_2G012640/CsaV3_2G014220/CsaV3_2G015170/CsaV3_2G025940/CsaV3_2G029620/CsaV3_3G004460/CsaV3_3G015910/CsaV3_3G037420/CsaV3_3G047980/CsaV3_4G001020/CsaV3_4G005820/CsaV3_4G007670/CsaV3_4G034600/CsaV3_5G002790/CsaV3_5G003600/CsaV3_5G004730/CsaV3_6G000140/CsaV3_6G034290/CsaV3_6G045040/CsaV3_7G0…	CsaV3_1G003530/CsaV3_1G004510/CsaV3_1G006890/CsaV3_1G011320/CsaV3_1G024160/CsaV3_1G033760/CsaV3_2G005260/CsaV3_2G012640/CsaV3_2G014220/CsaV3_2G015170/CsaV3_2G025940/CsaV3_2G029620/CsaV3_3G004460/CsaV3_3G015910/CsaV3_3G037420/CsaV3_3G047980/CsaV3_4G001020/CsaV3_4G005820/CsaV3_4G007670/CsaV3_4G034600/CsaV3_5G002790/CsaV3_5G003600/CsaV3_5G004730/CsaV3_6G000140/CsaV3_6G034290/CsaV3_6G045040/CsaV3_7G0…	29
BP	GO:0006974	cellular response to DNA damage stimulus	35/2174	65/6278	0.00108573	0.0354949	CsaV3_1G003630/CsaV3_1G008250/CsaV3_1G032850/CsaV3_1G038240/CsaV3_2G001430/CsaV3_2G002320/CsaV3_2G003690/CsaV3_2G009350/CsaV3_2G022190/CsaV3_2G031500/CsaV3_3G000200/CsaV3_3G009680/CsaV3_3G019190/CsaV3_3G032680/CsaV3_3G033440/CsaV3_3G037350/CsaV3_3G044350/CsaV3_3G044900/CsaV3_3G045200/CsaV3_4G010360/CsaV3_4G012030/CsaV3_4G012080/CsaV3_4G012090/CsaV3_4G012100/CsaV3_4G027610/CsaV3_5G033540/CsaV3_5G0…	CsaV3_1G003630/CsaV3_1G008250/CsaV3_1G032850/CsaV3_1G038240/CsaV3_2G001430/CsaV3_2G002320/CsaV3_2G003690/CsaV3_2G009350/CsaV3_2G022190/CsaV3_2G031500/CsaV3_3G000200/CsaV3_3G009680/CsaV3_3G019190/CsaV3_3G032680/CsaV3_3G033440/CsaV3_3G037350/CsaV3_3G044350/CsaV3_3G044900/CsaV3_3G045200/CsaV3_4G010360/CsaV3_4G012030/CsaV3_4G012080/CsaV3_4G012090/CsaV3_4G012100/CsaV3_4G027610/CsaV3_5G033540/CsaV3_5G0…	35
BP	GO:0033554	cellular response to stress	35/2174	65/6278	0.00108573	0.0354949	CsaV3_1G003630/CsaV3_1G008250/CsaV3_1G032850/CsaV3_1G038240/CsaV3_2G001430/CsaV3_2G002320/CsaV3_2G003690/CsaV3_2G009350/CsaV3_2G022190/CsaV3_2G031500/CsaV3_3G000200/CsaV3_3G009680/CsaV3_3G019190/CsaV3_3G032680/CsaV3_3G033440/CsaV3_3G037350/CsaV3_3G044350/CsaV3_3G044900/CsaV3_3G045200/CsaV3_4G010360/CsaV3_4G012030/CsaV3_4G012080/CsaV3_4G012090/CsaV3_4G012100/CsaV3_4G027610/CsaV3_5G033540/CsaV3_5G0…	CsaV3_1G003630/CsaV3_1G008250/CsaV3_1G032850/CsaV3_1G038240/CsaV3_2G001430/CsaV3_2G002320/CsaV3_2G003690/CsaV3_2G009350/CsaV3_2G022190/CsaV3_2G031500/CsaV3_3G000200/CsaV3_3G009680/CsaV3_3G019190/CsaV3_3G032680/CsaV3_3G033440/CsaV3_3G037350/CsaV3_3G044350/CsaV3_3G044900/CsaV3_3G045200/CsaV3_4G010360/CsaV3_4G012030/CsaV3_4G012080/CsaV3_4G012090/CsaV3_4G012100/CsaV3_4G027610/CsaV3_5G033540/CsaV3_5G0…	35
BP	GO:0006281	DNA repair	34/2174	63/6278	0.00120817	0.0366764	CsaV3_1G003630/CsaV3_1G008250/CsaV3_1G032850/CsaV3_1G038240/CsaV3_2G001430/CsaV3_2G002320/CsaV3_2G009350/CsaV3_2G022190/CsaV3_2G031500/CsaV3_3G000200/CsaV3_3G009680/CsaV3_3G019190/CsaV3_3G032680/CsaV3_3G033440/CsaV3_3G037350/CsaV3_3G044350/CsaV3_3G044900/CsaV3_3G045200/CsaV3_4G010360/CsaV3_4G012030/CsaV3_4G012080/CsaV3_4G012090/CsaV3_4G012100/CsaV3_4G027610/CsaV3_5G033540/CsaV3_5G034230/CsaV3_5G0…	CsaV3_1G003630/CsaV3_1G008250/CsaV3_1G032850/CsaV3_1G038240/CsaV3_2G001430/CsaV3_2G002320/CsaV3_2G009350/CsaV3_2G022190/CsaV3_2G031500/CsaV3_3G000200/CsaV3_3G009680/CsaV3_3G019190/CsaV3_3G032680/CsaV3_3G033440/CsaV3_3G037350/CsaV3_3G044350/CsaV3_3G044900/CsaV3_3G045200/CsaV3_4G010360/CsaV3_4G012030/CsaV3_4G012080/CsaV3_4G012090/CsaV3_4G012100/CsaV3_4G027610/CsaV3_5G033540/CsaV3_5G034230/CsaV3_5G0…	34
BP	GO:0005996	monosaccharide metabolic process	100352	13/6278	0.00227159	0.0643618	CsaV3_2G030420/CsaV3_2G036620/CsaV3_3G039800/CsaV3_4G013550/CsaV3_4G029990/CsaV3_4G031080/CsaV3_5G024900/CsaV3_6G016080/CsaV3_6G044640/CsaV3_6G047280	CsaV3_2G030420/CsaV3_2G036620/CsaV3_3G039800/CsaV3_4G013550/CsaV3_4G029990/CsaV3_4G031080/CsaV3_5G024900/CsaV3_6G016080/CsaV3_6G044640/CsaV3_6G047280	10
BP	GO:0019318	hexose metabolic process	100322	1599368	0.0051323	0.136327	CsaV3_2G030420/CsaV3_2G036620/CsaV3_4G013550/CsaV3_4G029990/CsaV3_4G031080/CsaV3_5G024900/CsaV3_6G016080/CsaV3_6G044640/CsaV3_6G047280	CsaV3_2G030420/CsaV3_2G036620/CsaV3_4G013550/CsaV3_4G029990/CsaV3_4G031080/CsaV3_5G024900/CsaV3_6G016080/CsaV3_6G044640/CsaV3_6G047280	9
BP	GO:0007010	cytoskeleton organization	14/2174	23/6278	0.00893669	0.223417	CsaV3_1G043050/CsaV3_2G006740/CsaV3_2G008570/CsaV3_3G003930/CsaV3_4G010070/CsaV3_4G011660/CsaV3_4G029590/CsaV3_4G031280/CsaV3_5G015790/CsaV3_6G004830/CsaV3_6G015340/CsaV3_6G016270/CsaV3_7G021840/CsaV3_7G023520	CsaV3_1G043050/CsaV3_2G006740/CsaV3_2G008570/CsaV3_3G003930/CsaV3_4G010070/CsaV3_4G011660/CsaV3_4G029590/CsaV3_4G031280/CsaV3_5G015790/CsaV3_6G004830/CsaV3_6G015340/CsaV3_6G016270/CsaV3_7G021840/CsaV3_7G023520	14
BP	GO:0008652	cellular amino acid biosynthetic process	23/2174	45/6278	0.0164463	0.388314	CsaV3_1G000670/CsaV3_1G037190/CsaV3_2G014210/CsaV3_3G004760/CsaV3_3G013840/CsaV3_3G021030/CsaV3_3G027930/CsaV3_3G040500/CsaV3_3G041590/CsaV3_3G043020/CsaV3_4G024670/CsaV3_5G014440/CsaV3_5G023920/CsaV3_5G029840/CsaV3_6G014760/CsaV3_6G016090/CsaV3_6G045310/CsaV3_6G047800/CsaV3_7G005980/CsaV3_7G006730/CsaV3_7G018620/CsaV3_7G021780/CsaV3_7G030560	CsaV3_1G000670/CsaV3_1G037190/CsaV3_2G014210/CsaV3_3G004760/CsaV3_3G013840/CsaV3_3G021030/CsaV3_3G027930/CsaV3_3G040500/CsaV3_3G041590/CsaV3_3G043020/CsaV3_4G024670/CsaV3_5G014440/CsaV3_5G023920/CsaV3_5G029840/CsaV3_6G014760/CsaV3_6G016090/CsaV3_6G045310/CsaV3_6G047800/CsaV3_7G005980/CsaV3_7G006730/CsaV3_7G018620/CsaV3_7G021780/CsaV3_7G030560	23
BP	GO:0044281	small molecule metabolic process	141/2174	353/6278	0.0184552	0.412813	CsaV3_1G000670/CsaV3_1G003090/CsaV3_1G003150/CsaV3_1G004890/CsaV3_1G005000/CsaV3_1G005960/CsaV3_1G008930/CsaV3_1G009520/CsaV3_1G010170/CsaV3_1G012640/CsaV3_1G012830/CsaV3_1G016970/CsaV3_1G030920/CsaV3_1G031480/CsaV3_1G035920/CsaV3_1G037190/CsaV3_1G037750/CsaV3_1G038230/CsaV3_1G039630/CsaV3_1G041450/CsaV3_1G042920/CsaV3_1G045800/CsaV3_2G001570/CsaV3_2G001660/CsaV3_2G003740/CsaV3_2G008510/CsaV3_2G0…	CsaV3_1G000670/CsaV3_1G003090/CsaV3_1G003150/CsaV3_1G004890/CsaV3_1G005000/CsaV3_1G005960/CsaV3_1G008930/CsaV3_1G009520/CsaV3_1G010170/CsaV3_1G012640/CsaV3_1G012830/CsaV3_1G016970/CsaV3_1G030920/CsaV3_1G031480/CsaV3_1G035920/CsaV3_1G037190/CsaV3_1G037750/CsaV3_1G038230/CsaV3_1G039630/CsaV3_1G041450/CsaV3_1G042920/CsaV3_1G045800/CsaV3_2G001570/CsaV3_2G001660/CsaV3_2G003740/CsaV3_2G008510/CsaV3_2G0…	141
BP	GO:0044262	cellular carbohydrate metabolic process	43/2174	96/6278	0.0241282	0.512723	CsaV3_1G001640/CsaV3_1G003390/CsaV3_1G004890/CsaV3_1G005170/CsaV3_1G009520/CsaV3_1G022900/CsaV3_1G031420/CsaV3_1G031430/CsaV3_1G031460/CsaV3_1G031470/CsaV3_1G041400/CsaV3_1G042280/CsaV3_1G042290/CsaV3_2G001660/CsaV3_2G018300/CsaV3_2G033300/CsaV3_2G034720/CsaV3_2G036170/CsaV3_3G016150/CsaV3_3G023420/CsaV3_3G036070/CsaV3_3G038290/CsaV3_3G046510/CsaV3_3G048830/CsaV3_4G001040/CsaV3_4G006800/CsaV3_4G0…	CsaV3_1G001640/CsaV3_1G003390/CsaV3_1G004890/CsaV3_1G005170/CsaV3_1G009520/CsaV3_1G022900/CsaV3_1G031420/CsaV3_1G031430/CsaV3_1G031460/CsaV3_1G031470/CsaV3_1G041400/CsaV3_1G042280/CsaV3_1G042290/CsaV3_2G001660/CsaV3_2G018300/CsaV3_2G033300/CsaV3_2G034720/CsaV3_2G036170/CsaV3_3G016150/CsaV3_3G023420/CsaV3_3G036070/CsaV3_3G038290/CsaV3_3G046510/CsaV3_3G048830/CsaV3_4G001040/CsaV3_4G006800/CsaV3_4G0…	43
BP	GO:0006996	organelle organization	38/2174	84/6278	0.0276365	0.55931	CsaV3_1G004130/CsaV3_1G005360/CsaV3_1G043050/CsaV3_2G006740/CsaV3_2G008570/CsaV3_2G034670/CsaV3_3G003930/CsaV3_3G009270/CsaV3_3G011580/CsaV3_3G016100/CsaV3_3G027790/CsaV3_3G032050/CsaV3_3G040650/CsaV3_3G043520/CsaV3_3G047220/CsaV3_4G000180/CsaV3_4G010070/CsaV3_4G011660/CsaV3_4G029590/CsaV3_4G031280/CsaV3_4G034020/CsaV3_5G015790/CsaV3_5G027630/CsaV3_5G028310/CsaV3_5G028660/CsaV3_5G037970/CsaV3_6G0…	CsaV3_1G004130/CsaV3_1G005360/CsaV3_1G043050/CsaV3_2G006740/CsaV3_2G008570/CsaV3_2G034670/CsaV3_3G003930/CsaV3_3G009270/CsaV3_3G011580/CsaV3_3G016100/CsaV3_3G027790/CsaV3_3G032050/CsaV3_3G040650/CsaV3_3G043520/CsaV3_3G047220/CsaV3_4G000180/CsaV3_4G010070/CsaV3_4G011660/CsaV3_4G029590/CsaV3_4G031280/CsaV3_4G034020/CsaV3_5G015790/CsaV3_5G027630/CsaV3_5G028310/CsaV3_5G028660/CsaV3_5G037970/CsaV3_6G0…	38
BP	GO:0006790	sulfur compound metabolic process	15/2174	28/6278	0.0303	0.585341	CsaV3_1G008530/CsaV3_1G010840/CsaV3_2G001680/CsaV3_2G008550/CsaV3_2G011840/CsaV3_3G040500/CsaV3_3G043020/CsaV3_3G043250/CsaV3_5G012850/CsaV3_5G029830/CsaV3_6G004170/CsaV3_6G044100/CsaV3_6G047800/CsaV3_7G018620/CsaV3_7G029140	CsaV3_1G008530/CsaV3_1G010840/CsaV3_2G001680/CsaV3_2G008550/CsaV3_2G011840/CsaV3_3G040500/CsaV3_3G043020/CsaV3_3G043250/CsaV3_5G012850/CsaV3_5G029830/CsaV3_6G004170/CsaV3_6G044100/CsaV3_6G047800/CsaV3_7G018620/CsaV3_7G029140	15
BP	GO:0016053	organic acid biosynthetic process	51/2174	120/6278	0.0429983	0.671646	CsaV3_1G000670/CsaV3_1G003090/CsaV3_1G030920/CsaV3_1G031480/CsaV3_1G035920/CsaV3_1G037190/CsaV3_2G013320/CsaV3_2G014210/CsaV3_2G028690/CsaV3_2G030420/CsaV3_3G003250/CsaV3_3G004760/CsaV3_3G009100/CsaV3_3G010300/CsaV3_3G013840/CsaV3_3G016490/CsaV3_3G017450/CsaV3_3G021030/CsaV3_3G021780/CsaV3_3G027930/CsaV3_3G035920/CsaV3_3G040500/CsaV3_3G041590/CsaV3_3G043020/CsaV3_4G013530/CsaV3_4G024670/CsaV3_4G0…	CsaV3_1G000670/CsaV3_1G003090/CsaV3_1G030920/CsaV3_1G031480/CsaV3_1G035920/CsaV3_1G037190/CsaV3_2G013320/CsaV3_2G014210/CsaV3_2G028690/CsaV3_2G030420/CsaV3_3G003250/CsaV3_3G004760/CsaV3_3G009100/CsaV3_3G010300/CsaV3_3G013840/CsaV3_3G016490/CsaV3_3G017450/CsaV3_3G021030/CsaV3_3G021780/CsaV3_3G027930/CsaV3_3G035920/CsaV3_3G040500/CsaV3_3G041590/CsaV3_3G043020/CsaV3_4G013530/CsaV3_4G024670/CsaV3_4G0…	51
BP	GO:0046394	carboxylic acid biosynthetic process	51/2174	120/6278	0.0429983	0.671646	CsaV3_1G000670/CsaV3_1G003090/CsaV3_1G030920/CsaV3_1G031480/CsaV3_1G035920/CsaV3_1G037190/CsaV3_2G013320/CsaV3_2G014210/CsaV3_2G028690/CsaV3_2G030420/CsaV3_3G003250/CsaV3_3G004760/CsaV3_3G009100/CsaV3_3G010300/CsaV3_3G013840/CsaV3_3G016490/CsaV3_3G017450/CsaV3_3G021030/CsaV3_3G021780/CsaV3_3G027930/CsaV3_3G035920/CsaV3_3G040500/CsaV3_3G041590/CsaV3_3G043020/CsaV3_4G013530/CsaV3_4G024670/CsaV3_4G0…	CsaV3_1G000670/CsaV3_1G003090/CsaV3_1G030920/CsaV3_1G031480/CsaV3_1G035920/CsaV3_1G037190/CsaV3_2G013320/CsaV3_2G014210/CsaV3_2G028690/CsaV3_2G030420/CsaV3_3G003250/CsaV3_3G004760/CsaV3_3G009100/CsaV3_3G010300/CsaV3_3G013840/CsaV3_3G016490/CsaV3_3G017450/CsaV3_3G021030/CsaV3_3G021780/CsaV3_3G027930/CsaV3_3G035920/CsaV3_3G040500/CsaV3_3G041590/CsaV3_3G043020/CsaV3_4G013530/CsaV3_4G024670/CsaV3_4G0…	51
BP	GO:0006066	alcohol metabolic process	100291	13/6278	0.0432467	0.671646	CsaV3_1G004890/CsaV3_2G001660/CsaV3_2G036580/CsaV3_3G001540/CsaV3_3G023420/CsaV3_3G048980/CsaV3_5G004930/CsaV3_UNG190490	CsaV3_1G004890/CsaV3_2G001660/CsaV3_2G036580/CsaV3_3G001540/CsaV3_3G023420/CsaV3_3G048980/CsaV3_5G004930/CsaV3_UNG190490	8
BP	GO:0006694	steroid biosynthetic process	100291	13/6278	0.0432467	0.671646	CsaV3_1G029290/CsaV3_3G008180/CsaV3_3G008190/CsaV3_3G015980/CsaV3_3G032020/CsaV3_4G037630/CsaV3_6G006190/CsaV3_6G031840	CsaV3_1G029290/CsaV3_3G008180/CsaV3_3G008190/CsaV3_3G015980/CsaV3_3G032020/CsaV3_4G037630/CsaV3_6G006190/CsaV3_6G031840	8
BP	GO:0019751	polyol metabolic process	100291	13/6278	0.0432467	0.671646	CsaV3_1G004890/CsaV3_2G001660/CsaV3_2G036580/CsaV3_3G001540/CsaV3_3G023420/CsaV3_3G048980/CsaV3_5G004930/CsaV3_UNG190490	CsaV3_1G004890/CsaV3_2G001660/CsaV3_2G036580/CsaV3_3G001540/CsaV3_3G023420/CsaV3_3G048980/CsaV3_5G004930/CsaV3_UNG190490	8
BP	GO:0007264	small GTPase mediated signal transduction	28/2174	61/6278	0.0442496	0.671646	CsaV3_1G004280/CsaV3_1G015390/CsaV3_1G029700/CsaV3_1G029790/CsaV3_1G044700/CsaV3_2G002140/CsaV3_2G016070/CsaV3_2G017730/CsaV3_2G021030/CsaV3_2G024270/CsaV3_2G031840/CsaV3_2G034580/CsaV3_3G002400/CsaV3_3G006490/CsaV3_3G009610/CsaV3_3G010020/CsaV3_3G031710/CsaV3_3G036220/CsaV3_3G049890/CsaV3_4G003850/CsaV3_4G008100/CsaV3_4G027660/CsaV3_5G008330/CsaV3_6G002680/CsaV3_6G022210/CsaV3_6G045420/CsaV3_7G0…	CsaV3_1G004280/CsaV3_1G015390/CsaV3_1G029700/CsaV3_1G029790/CsaV3_1G044700/CsaV3_2G002140/CsaV3_2G016070/CsaV3_2G017730/CsaV3_2G021030/CsaV3_2G024270/CsaV3_2G031840/CsaV3_2G034580/CsaV3_3G002400/CsaV3_3G006490/CsaV3_3G009610/CsaV3_3G010020/CsaV3_3G031710/CsaV3_3G036220/CsaV3_3G049890/CsaV3_4G003850/CsaV3_4G008100/CsaV3_4G027660/CsaV3_5G008330/CsaV3_6G002680/CsaV3_6G022210/CsaV3_6G045420/CsaV3_7G0…	28
BP	GO:0019752	carboxylic acid metabolic process	89/2174	222/6278	0.048589	0.71208	CsaV3_1G000670/CsaV3_1G003090/CsaV3_1G003150/CsaV3_1G005000/CsaV3_1G009520/CsaV3_1G012640/CsaV3_1G012830/CsaV3_1G030920/CsaV3_1G031480/CsaV3_1G035920/CsaV3_1G037190/CsaV3_1G038230/CsaV3_1G039630/CsaV3_2G003740/CsaV3_2G008510/CsaV3_2G011840/CsaV3_2G013320/CsaV3_2G014210/CsaV3_2G028690/CsaV3_2G030420/CsaV3_2G033820/CsaV3_2G035120/CsaV3_3G002020/CsaV3_3G003250/CsaV3_3G004760/CsaV3_3G009100/CsaV3_3G0…	CsaV3_1G000670/CsaV3_1G003090/CsaV3_1G003150/CsaV3_1G005000/CsaV3_1G009520/CsaV3_1G012640/CsaV3_1G012830/CsaV3_1G030920/CsaV3_1G031480/CsaV3_1G035920/CsaV3_1G037190/CsaV3_1G038230/CsaV3_1G039630/CsaV3_2G003740/CsaV3_2G008510/CsaV3_2G011840/CsaV3_2G013320/CsaV3_2G014210/CsaV3_2G028690/CsaV3_2G030420/CsaV3_2G033820/CsaV3_2G035120/CsaV3_3G002020/CsaV3_3G003250/CsaV3_3G004760/CsaV3_3G009100/CsaV3_3G0…	89
BP	GO:0044283	small molecule biosynthetic process	60/2174	145/6278	0.0517922	0.722725	CsaV3_1G000670/CsaV3_1G003090/CsaV3_1G030920/CsaV3_1G031480/CsaV3_1G035920/CsaV3_1G037190/CsaV3_1G041450/CsaV3_2G013320/CsaV3_2G014210/CsaV3_2G028690/CsaV3_2G030420/CsaV3_2G036620/CsaV3_3G003250/CsaV3_3G004760/CsaV3_3G007170/CsaV3_3G009100/CsaV3_3G010300/CsaV3_3G013840/CsaV3_3G016490/CsaV3_3G017450/CsaV3_3G021030/CsaV3_3G021780/CsaV3_3G027930/CsaV3_3G035920/CsaV3_3G040500/CsaV3_3G041590/CsaV3_3G0…	CsaV3_1G000670/CsaV3_1G003090/CsaV3_1G030920/CsaV3_1G031480/CsaV3_1G035920/CsaV3_1G037190/CsaV3_1G041450/CsaV3_2G013320/CsaV3_2G014210/CsaV3_2G028690/CsaV3_2G030420/CsaV3_2G036620/CsaV3_3G003250/CsaV3_3G004760/CsaV3_3G007170/CsaV3_3G009100/CsaV3_3G010300/CsaV3_3G013840/CsaV3_3G016490/CsaV3_3G017450/CsaV3_3G021030/CsaV3_3G021780/CsaV3_3G027930/CsaV3_3G035920/CsaV3_3G040500/CsaV3_3G041590/CsaV3_3G0…	60
BP	GO:0022607	cellular component assembly	31/2174	70/6278	0.0586666	0.722725	CsaV3_1G003410/CsaV3_1G005360/CsaV3_1G008530/CsaV3_1G010840/CsaV3_1G028940/CsaV3_1G042700/CsaV3_1G043050/CsaV3_2G006740/CsaV3_2G008550/CsaV3_3G003930/CsaV3_3G005970/CsaV3_3G043520/CsaV3_4G000180/CsaV3_4G010070/CsaV3_4G031280/CsaV3_5G025150/CsaV3_5G028310/CsaV3_5G029830/CsaV3_5G033110/CsaV3_5G037970/CsaV3_6G004170/CsaV3_6G004830/CsaV3_6G006410/CsaV3_6G015340/CsaV3_6G036780/CsaV3_6G038790/CsaV3_6G0…	CsaV3_1G003410/CsaV3_1G005360/CsaV3_1G008530/CsaV3_1G010840/CsaV3_1G028940/CsaV3_1G042700/CsaV3_1G043050/CsaV3_2G006740/CsaV3_2G008550/CsaV3_3G003930/CsaV3_3G005970/CsaV3_3G043520/CsaV3_4G000180/CsaV3_4G010070/CsaV3_4G031280/CsaV3_5G025150/CsaV3_5G028310/CsaV3_5G029830/CsaV3_5G033110/CsaV3_5G037970/CsaV3_6G004170/CsaV3_6G004830/CsaV3_6G006410/CsaV3_6G015340/CsaV3_6G036780/CsaV3_6G038790/CsaV3_6G0…	31
BP	GO:0005984	disaccharide metabolic process	100413	23/6278	0.0629398	0.722725	CsaV3_1G001640/CsaV3_1G005170/CsaV3_1G022900/CsaV3_1G041400/CsaV3_2G033300/CsaV3_3G016150/CsaV3_3G038290/CsaV3_5G002020/CsaV3_5G020420/CsaV3_5G031700/CsaV3_6G045560/CsaV3_6G051060	CsaV3_1G001640/CsaV3_1G005170/CsaV3_1G022900/CsaV3_1G041400/CsaV3_2G033300/CsaV3_3G016150/CsaV3_3G038290/CsaV3_5G002020/CsaV3_5G020420/CsaV3_5G031700/CsaV3_6G045560/CsaV3_6G051060	12
BP	GO:0008202	steroid metabolic process	100291	14/6278	0.0708812	0.722725	CsaV3_1G029290/CsaV3_3G008180/CsaV3_3G008190/CsaV3_3G015980/CsaV3_3G032020/CsaV3_4G037630/CsaV3_6G006190/CsaV3_6G031840	CsaV3_1G029290/CsaV3_3G008180/CsaV3_3G008190/CsaV3_3G015980/CsaV3_3G032020/CsaV3_4G037630/CsaV3_6G006190/CsaV3_6G031840	8
BP	GO:0009311	oligosaccharide metabolic process	13/2174	26/6278	0.0766537	0.722725	CsaV3_1G001640/CsaV3_1G005170/CsaV3_1G022900/CsaV3_1G041400/CsaV3_2G033300/CsaV3_3G016150/CsaV3_3G038290/CsaV3_5G002020/CsaV3_5G020420/CsaV3_5G031700/CsaV3_6G045560/CsaV3_6G051060/CsaV3_7G002510	CsaV3_1G001640/CsaV3_1G005170/CsaV3_1G022900/CsaV3_1G041400/CsaV3_2G033300/CsaV3_3G016150/CsaV3_3G038290/CsaV3_5G002020/CsaV3_5G020420/CsaV3_5G031700/CsaV3_6G045560/CsaV3_6G051060/CsaV3_7G002510	13
BP	GO:0009132	nucleoside diphosphate metabolic process	15/2174	31/6278	0.0792346	0.722725	CsaV3_1G003090/CsaV3_1G035920/CsaV3_2G013320/CsaV3_2G030420/CsaV3_3G007170/CsaV3_3G021780/CsaV3_3G027630/CsaV3_3G035920/CsaV3_4G037690/CsaV3_5G029170/CsaV3_6G040330/CsaV3_6G040390/CsaV3_6G040430/CsaV3_6G048680/CsaV3_7G022930	CsaV3_1G003090/CsaV3_1G035920/CsaV3_2G013320/CsaV3_2G030420/CsaV3_3G007170/CsaV3_3G021780/CsaV3_3G027630/CsaV3_3G035920/CsaV3_4G037690/CsaV3_5G029170/CsaV3_6G040330/CsaV3_6G040390/CsaV3_6G040430/CsaV3_6G048680/CsaV3_7G022930	15
BP	GO:0006357	regulation of transcription by RNA polymerase II	100260	1599368	0.0801208	0.722725	CsaV3_2G001190/CsaV3_3G000870/CsaV3_3G028740/CsaV3_4G024350/CsaV3_4G031690/CsaV3_7G005510/CsaV3_7G027100	CsaV3_2G001190/CsaV3_3G000870/CsaV3_3G028740/CsaV3_4G024350/CsaV3_4G031690/CsaV3_7G005510/CsaV3_7G027100	7
BP	GO:0006778	porphyrin-containing compound metabolic process	100260	1599368	0.0801208	0.722725	CsaV3_1G000080/CsaV3_2G013440/CsaV3_4G007220/CsaV3_4G008050/CsaV3_4G034140/CsaV3_5G025230/CsaV3_6G013410	CsaV3_1G000080/CsaV3_2G013440/CsaV3_4G007220/CsaV3_4G008050/CsaV3_4G034140/CsaV3_5G025230/CsaV3_6G013410	7
BP	GO:0042440	pigment metabolic process	100260	1599368	0.0801208	0.722725	CsaV3_1G000080/CsaV3_2G001370/CsaV3_2G013440/CsaV3_4G022080/CsaV3_4G034140/CsaV3_5G025230/CsaV3_6G013410	CsaV3_1G000080/CsaV3_2G001370/CsaV3_2G013440/CsaV3_4G022080/CsaV3_4G034140/CsaV3_5G025230/CsaV3_6G013410	7
BP	GO:0033013	tetrapyrrole metabolic process	100352	19/6278	0.0816814	0.722725	CsaV3_1G000080/CsaV3_1G028580/CsaV3_2G013440/CsaV3_2G028140/CsaV3_2G030530/CsaV3_4G007220/CsaV3_4G008050/CsaV3_4G034140/CsaV3_5G025230/CsaV3_6G013410	CsaV3_1G000080/CsaV3_1G028580/CsaV3_2G013440/CsaV3_2G028140/CsaV3_2G030530/CsaV3_4G007220/CsaV3_4G008050/CsaV3_4G034140/CsaV3_5G025230/CsaV3_6G013410	10
BP	GO:0043436	oxoacid metabolic process	90/2174	230/6278	0.0829209	0.722725	CsaV3_1G000670/CsaV3_1G003090/CsaV3_1G003150/CsaV3_1G005000/CsaV3_1G009520/CsaV3_1G012640/CsaV3_1G012830/CsaV3_1G030920/CsaV3_1G031480/CsaV3_1G035920/CsaV3_1G037190/CsaV3_1G038230/CsaV3_1G039630/CsaV3_2G003740/CsaV3_2G008510/CsaV3_2G011840/CsaV3_2G013320/CsaV3_2G014210/CsaV3_2G028690/CsaV3_2G030420/CsaV3_2G033820/CsaV3_2G035120/CsaV3_3G002020/CsaV3_3G003250/CsaV3_3G004760/CsaV3_3G009100/CsaV3_3G0…	CsaV3_1G000670/CsaV3_1G003090/CsaV3_1G003150/CsaV3_1G005000/CsaV3_1G009520/CsaV3_1G012640/CsaV3_1G012830/CsaV3_1G030920/CsaV3_1G031480/CsaV3_1G035920/CsaV3_1G037190/CsaV3_1G038230/CsaV3_1G039630/CsaV3_2G003740/CsaV3_2G008510/CsaV3_2G011840/CsaV3_2G013320/CsaV3_2G014210/CsaV3_2G028690/CsaV3_2G030420/CsaV3_2G033820/CsaV3_2G035120/CsaV3_3G002020/CsaV3_3G003250/CsaV3_3G004760/CsaV3_3G009100/CsaV3_3G0…	90
BP	GO:0009166	nucleotide catabolic process	14/2174	29/6278	0.090035	0.722725	CsaV3_1G003090/CsaV3_1G035920/CsaV3_1G041450/CsaV3_2G013320/CsaV3_2G030420/CsaV3_3G021780/CsaV3_3G035920/CsaV3_4G037690/CsaV3_5G029170/CsaV3_6G040330/CsaV3_6G040390/CsaV3_6G040430/CsaV3_6G048680/CsaV3_7G022930	CsaV3_1G003090/CsaV3_1G035920/CsaV3_1G041450/CsaV3_2G013320/CsaV3_2G030420/CsaV3_3G021780/CsaV3_3G035920/CsaV3_4G037690/CsaV3_5G029170/CsaV3_6G040330/CsaV3_6G040390/CsaV3_6G040430/CsaV3_6G048680/CsaV3_7G022930	14
BP	GO:1901292	nucleoside phosphate catabolic process	14/2174	29/6278	0.090035	0.722725	CsaV3_1G003090/CsaV3_1G035920/CsaV3_1G041450/CsaV3_2G013320/CsaV3_2G030420/CsaV3_3G021780/CsaV3_3G035920/CsaV3_4G037690/CsaV3_5G029170/CsaV3_6G040330/CsaV3_6G040390/CsaV3_6G040430/CsaV3_6G048680/CsaV3_7G022930	CsaV3_1G003090/CsaV3_1G035920/CsaV3_1G041450/CsaV3_2G013320/CsaV3_2G030420/CsaV3_3G021780/CsaV3_3G035920/CsaV3_4G037690/CsaV3_5G029170/CsaV3_6G040330/CsaV3_6G040390/CsaV3_6G040430/CsaV3_6G048680/CsaV3_7G022930	14
BP	GO:0006904	vesicle docking involved in exocytosis	100230	1599307	0.0904438	0.722725	CsaV3_5G036050/CsaV3_6G006180/CsaV3_6G030940/CsaV3_6G036710/CsaV3_7G001760/CsaV3_7G029390	CsaV3_5G036050/CsaV3_6G006180/CsaV3_6G030940/CsaV3_6G036710/CsaV3_7G001760/CsaV3_7G029390	6
BP	GO:0009066	aspartate family amino acid metabolic process	100230	1599307	0.0904438	0.722725	CsaV3_2G011840/CsaV3_3G040500/CsaV3_3G043020/CsaV3_4G024670/CsaV3_6G016090/CsaV3_7G021780	CsaV3_2G011840/CsaV3_3G040500/CsaV3_3G043020/CsaV3_4G024670/CsaV3_6G016090/CsaV3_7G021780	6
BP	GO:0140029	exocytic process	100230	1599307	0.0904438	0.722725	CsaV3_5G036050/CsaV3_6G006180/CsaV3_6G030940/CsaV3_6G036710/CsaV3_7G001760/CsaV3_7G029390	CsaV3_5G036050/CsaV3_6G006180/CsaV3_6G030940/CsaV3_6G036710/CsaV3_7G001760/CsaV3_7G029390	6
BP	GO:0034404	nucleobase-containing small molecule biosynthetic process	16/2174	34/6278	0.0908431	0.722725	CsaV3_1G003090/CsaV3_1G035920/CsaV3_1G041450/CsaV3_2G013320/CsaV3_2G030420/CsaV3_3G007170/CsaV3_3G021780/CsaV3_3G035920/CsaV3_4G037690/CsaV3_5G002770/CsaV3_5G029170/CsaV3_6G040330/CsaV3_6G040390/CsaV3_6G040430/CsaV3_6G048680/CsaV3_7G022930	CsaV3_1G003090/CsaV3_1G035920/CsaV3_1G041450/CsaV3_2G013320/CsaV3_2G030420/CsaV3_3G007170/CsaV3_3G021780/CsaV3_3G035920/CsaV3_4G037690/CsaV3_5G002770/CsaV3_5G029170/CsaV3_6G040330/CsaV3_6G040390/CsaV3_6G040430/CsaV3_6G048680/CsaV3_7G022930	16
BP	GO:0006082	organic acid metabolic process	90/2174	231/6278	0.0909629	0.722725	CsaV3_1G000670/CsaV3_1G003090/CsaV3_1G003150/CsaV3_1G005000/CsaV3_1G009520/CsaV3_1G012640/CsaV3_1G012830/CsaV3_1G030920/CsaV3_1G031480/CsaV3_1G035920/CsaV3_1G037190/CsaV3_1G038230/CsaV3_1G039630/CsaV3_2G003740/CsaV3_2G008510/CsaV3_2G011840/CsaV3_2G013320/CsaV3_2G014210/CsaV3_2G028690/CsaV3_2G030420/CsaV3_2G033820/CsaV3_2G035120/CsaV3_3G002020/CsaV3_3G003250/CsaV3_3G004760/CsaV3_3G009100/CsaV3_3G0…	CsaV3_1G000670/CsaV3_1G003090/CsaV3_1G003150/CsaV3_1G005000/CsaV3_1G009520/CsaV3_1G012640/CsaV3_1G012830/CsaV3_1G030920/CsaV3_1G031480/CsaV3_1G035920/CsaV3_1G037190/CsaV3_1G038230/CsaV3_1G039630/CsaV3_2G003740/CsaV3_2G008510/CsaV3_2G011840/CsaV3_2G013320/CsaV3_2G014210/CsaV3_2G028690/CsaV3_2G030420/CsaV3_2G033820/CsaV3_2G035120/CsaV3_3G002020/CsaV3_3G003250/CsaV3_3G004760/CsaV3_3G009100/CsaV3_3G0…	90
BP	GO:0006520	cellular amino acid metabolic process	45/2174	110/6278	0.0985589	0.722725	CsaV3_1G000670/CsaV3_1G003150/CsaV3_1G012640/CsaV3_1G012830/CsaV3_1G037190/CsaV3_1G038230/CsaV3_1G039630/CsaV3_2G003740/CsaV3_2G008510/CsaV3_2G011840/CsaV3_2G014210/CsaV3_2G033820/CsaV3_3G002020/CsaV3_3G004760/CsaV3_3G013840/CsaV3_3G014640/CsaV3_3G021030/CsaV3_3G027930/CsaV3_3G031480/CsaV3_3G040500/CsaV3_3G041590/CsaV3_3G043020/CsaV3_3G045350/CsaV3_3G048470/CsaV3_4G003190/CsaV3_4G024670/CsaV3_5G0…	CsaV3_1G000670/CsaV3_1G003150/CsaV3_1G012640/CsaV3_1G012830/CsaV3_1G037190/CsaV3_1G038230/CsaV3_1G039630/CsaV3_2G003740/CsaV3_2G008510/CsaV3_2G011840/CsaV3_2G014210/CsaV3_2G033820/CsaV3_3G002020/CsaV3_3G004760/CsaV3_3G013840/CsaV3_3G014640/CsaV3_3G021030/CsaV3_3G027930/CsaV3_3G031480/CsaV3_3G040500/CsaV3_3G041590/CsaV3_3G043020/CsaV3_3G045350/CsaV3_3G048470/CsaV3_4G003190/CsaV3_4G024670/CsaV3_5G0…	45
BP	GO:0051716	cellular response to stimulus	96/2174	249/6278	0.104356	0.722725	CsaV3_1G001860/CsaV3_1G003630/CsaV3_1G004280/CsaV3_1G008250/CsaV3_1G015390/CsaV3_1G029700/CsaV3_1G029790/CsaV3_1G032850/CsaV3_1G036200/CsaV3_1G038240/CsaV3_1G039330/CsaV3_1G043470/CsaV3_1G044700/CsaV3_2G001430/CsaV3_2G002140/CsaV3_2G002320/CsaV3_2G003690/CsaV3_2G004870/CsaV3_2G004890/CsaV3_2G009260/CsaV3_2G009350/CsaV3_2G013330/CsaV3_2G016070/CsaV3_2G017730/CsaV3_2G021030/CsaV3_2G022190/CsaV3_2G0…	CsaV3_1G001860/CsaV3_1G003630/CsaV3_1G004280/CsaV3_1G008250/CsaV3_1G015390/CsaV3_1G029700/CsaV3_1G029790/CsaV3_1G032850/CsaV3_1G036200/CsaV3_1G038240/CsaV3_1G039330/CsaV3_1G043470/CsaV3_1G044700/CsaV3_2G001430/CsaV3_2G002140/CsaV3_2G002320/CsaV3_2G003690/CsaV3_2G004870/CsaV3_2G004890/CsaV3_2G009260/CsaV3_2G009350/CsaV3_2G013330/CsaV3_2G016070/CsaV3_2G017730/CsaV3_2G021030/CsaV3_2G022190/CsaV3_2G0…	96
BP	GO:0016052	carbohydrate catabolic process	18/2174	40/6278	0.113107	0.722725	CsaV3_1G003090/CsaV3_1G035920/CsaV3_2G001660/CsaV3_2G013320/CsaV3_2G030420/CsaV3_3G002150/CsaV3_3G011520/CsaV3_3G021780/CsaV3_3G023420/CsaV3_3G035920/CsaV3_4G013550/CsaV3_4G037690/CsaV3_5G029170/CsaV3_6G040330/CsaV3_6G040390/CsaV3_6G040430/CsaV3_6G048680/CsaV3_7G022930	CsaV3_1G003090/CsaV3_1G035920/CsaV3_2G001660/CsaV3_2G013320/CsaV3_2G030420/CsaV3_3G002150/CsaV3_3G011520/CsaV3_3G021780/CsaV3_3G023420/CsaV3_3G035920/CsaV3_4G013550/CsaV3_4G037690/CsaV3_5G029170/CsaV3_6G040330/CsaV3_6G040390/CsaV3_6G040430/CsaV3_6G048680/CsaV3_7G022930	18
BP	GO:0019362	pyridine nucleotide metabolic process	18/2174	40/6278	0.113107	0.722725	CsaV3_1G003090/CsaV3_1G008930/CsaV3_1G035920/CsaV3_1G037750/CsaV3_1G042920/CsaV3_2G013320/CsaV3_2G030420/CsaV3_3G021780/CsaV3_3G035920/CsaV3_4G006330/CsaV3_4G037690/CsaV3_5G028490/CsaV3_5G029170/CsaV3_6G040330/CsaV3_6G040390/CsaV3_6G040430/CsaV3_6G048680/CsaV3_7G022930	CsaV3_1G003090/CsaV3_1G008930/CsaV3_1G035920/CsaV3_1G037750/CsaV3_1G042920/CsaV3_2G013320/CsaV3_2G030420/CsaV3_3G021780/CsaV3_3G035920/CsaV3_4G006330/CsaV3_4G037690/CsaV3_5G028490/CsaV3_5G029170/CsaV3_6G040330/CsaV3_6G040390/CsaV3_6G040430/CsaV3_6G048680/CsaV3_7G022930	18
BP	GO:0046496	nicotinamide nucleotide metabolic process	18/2174	40/6278	0.113107	0.722725	CsaV3_1G003090/CsaV3_1G008930/CsaV3_1G035920/CsaV3_1G037750/CsaV3_1G042920/CsaV3_2G013320/CsaV3_2G030420/CsaV3_3G021780/CsaV3_3G035920/CsaV3_4G006330/CsaV3_4G037690/CsaV3_5G028490/CsaV3_5G029170/CsaV3_6G040330/CsaV3_6G040390/CsaV3_6G040430/CsaV3_6G048680/CsaV3_7G022930	CsaV3_1G003090/CsaV3_1G008930/CsaV3_1G035920/CsaV3_1G037750/CsaV3_1G042920/CsaV3_2G013320/CsaV3_2G030420/CsaV3_3G021780/CsaV3_3G035920/CsaV3_4G006330/CsaV3_4G037690/CsaV3_5G028490/CsaV3_5G029170/CsaV3_6G040330/CsaV3_6G040390/CsaV3_6G040430/CsaV3_6G048680/CsaV3_7G022930	18
BP	GO:0006090	pyruvate metabolic process	14/2174	30/6278	0.116898	0.722725	CsaV3_1G003090/CsaV3_1G035920/CsaV3_2G013320/CsaV3_2G030420/CsaV3_3G021780/CsaV3_3G035920/CsaV3_4G037690/CsaV3_5G029170/CsaV3_6G040330/CsaV3_6G040390/CsaV3_6G040430/CsaV3_6G048680/CsaV3_7G010240/CsaV3_7G022930	CsaV3_1G003090/CsaV3_1G035920/CsaV3_2G013320/CsaV3_2G030420/CsaV3_3G021780/CsaV3_3G035920/CsaV3_4G037690/CsaV3_5G029170/CsaV3_6G040330/CsaV3_6G040390/CsaV3_6G040430/CsaV3_6G048680/CsaV3_7G010240/CsaV3_7G022930	14
BP	GO:0006165	nucleoside diphosphate phosphorylation	14/2174	30/6278	0.116898	0.722725	CsaV3_1G003090/CsaV3_1G035920/CsaV3_2G013320/CsaV3_2G030420/CsaV3_3G007170/CsaV3_3G021780/CsaV3_3G035920/CsaV3_4G037690/CsaV3_5G029170/CsaV3_6G040330/CsaV3_6G040390/CsaV3_6G040430/CsaV3_6G048680/CsaV3_7G022930	CsaV3_1G003090/CsaV3_1G035920/CsaV3_2G013320/CsaV3_2G030420/CsaV3_3G007170/CsaV3_3G021780/CsaV3_3G035920/CsaV3_4G037690/CsaV3_5G029170/CsaV3_6G040330/CsaV3_6G040390/CsaV3_6G040430/CsaV3_6G048680/CsaV3_7G022930	14
BP	GO:0046939	nucleotide phosphorylation	14/2174	30/6278	0.116898	0.722725	CsaV3_1G003090/CsaV3_1G035920/CsaV3_2G013320/CsaV3_2G030420/CsaV3_3G007170/CsaV3_3G021780/CsaV3_3G035920/CsaV3_4G037690/CsaV3_5G029170/CsaV3_6G040330/CsaV3_6G040390/CsaV3_6G040430/CsaV3_6G048680/CsaV3_7G022930	CsaV3_1G003090/CsaV3_1G035920/CsaV3_2G013320/CsaV3_2G030420/CsaV3_3G007170/CsaV3_3G021780/CsaV3_3G035920/CsaV3_4G037690/CsaV3_5G029170/CsaV3_6G040330/CsaV3_6G040390/CsaV3_6G040430/CsaV3_6G048680/CsaV3_7G022930	14
BP	GO:0009142	nucleoside triphosphate biosynthetic process	21/2174	48/6278	0.119733	0.722725	CsaV3_1G003090/CsaV3_1G005960/CsaV3_1G035920/CsaV3_2G001570/CsaV3_2G013320/CsaV3_2G030420/CsaV3_3G007170/CsaV3_3G007840/CsaV3_3G010470/CsaV3_3G021780/CsaV3_3G035920/CsaV3_4G037690/CsaV3_5G029170/CsaV3_5G034810/CsaV3_5G036470/CsaV3_6G040330/CsaV3_6G040390/CsaV3_6G040430/CsaV3_6G048680/CsaV3_6G049050/CsaV3_7G022930	CsaV3_1G003090/CsaV3_1G005960/CsaV3_1G035920/CsaV3_2G001570/CsaV3_2G013320/CsaV3_2G030420/CsaV3_3G007170/CsaV3_3G007840/CsaV3_3G010470/CsaV3_3G021780/CsaV3_3G035920/CsaV3_4G037690/CsaV3_5G029170/CsaV3_5G034810/CsaV3_5G036470/CsaV3_6G040330/CsaV3_6G040390/CsaV3_6G040430/CsaV3_6G048680/CsaV3_6G049050/CsaV3_7G022930	21
BP	GO:0009145	purine nucleoside triphosphate biosynthetic process	21/2174	48/6278	0.119733	0.722725	CsaV3_1G003090/CsaV3_1G005960/CsaV3_1G035920/CsaV3_2G001570/CsaV3_2G013320/CsaV3_2G030420/CsaV3_3G007170/CsaV3_3G007840/CsaV3_3G010470/CsaV3_3G021780/CsaV3_3G035920/CsaV3_4G037690/CsaV3_5G029170/CsaV3_5G034810/CsaV3_5G036470/CsaV3_6G040330/CsaV3_6G040390/CsaV3_6G040430/CsaV3_6G048680/CsaV3_6G049050/CsaV3_7G022930	CsaV3_1G003090/CsaV3_1G005960/CsaV3_1G035920/CsaV3_2G001570/CsaV3_2G013320/CsaV3_2G030420/CsaV3_3G007170/CsaV3_3G007840/CsaV3_3G010470/CsaV3_3G021780/CsaV3_3G035920/CsaV3_4G037690/CsaV3_5G029170/CsaV3_5G034810/CsaV3_5G036470/CsaV3_6G040330/CsaV3_6G040390/CsaV3_6G040430/CsaV3_6G048680/CsaV3_6G049050/CsaV3_7G022930	21
BP	GO:0009201	ribonucleoside triphosphate biosynthetic process	21/2174	48/6278	0.119733	0.722725	CsaV3_1G003090/CsaV3_1G005960/CsaV3_1G035920/CsaV3_2G001570/CsaV3_2G013320/CsaV3_2G030420/CsaV3_3G007170/CsaV3_3G007840/CsaV3_3G010470/CsaV3_3G021780/CsaV3_3G035920/CsaV3_4G037690/CsaV3_5G029170/CsaV3_5G034810/CsaV3_5G036470/CsaV3_6G040330/CsaV3_6G040390/CsaV3_6G040430/CsaV3_6G048680/CsaV3_6G049050/CsaV3_7G022930	CsaV3_1G003090/CsaV3_1G005960/CsaV3_1G035920/CsaV3_2G001570/CsaV3_2G013320/CsaV3_2G030420/CsaV3_3G007170/CsaV3_3G007840/CsaV3_3G010470/CsaV3_3G021780/CsaV3_3G035920/CsaV3_4G037690/CsaV3_5G029170/CsaV3_5G034810/CsaV3_5G036470/CsaV3_6G040330/CsaV3_6G040390/CsaV3_6G040430/CsaV3_6G048680/CsaV3_6G049050/CsaV3_7G022930	21
BP	GO:0009206	purine ribonucleoside triphosphate biosynthetic process	21/2174	48/6278	0.119733	0.722725	CsaV3_1G003090/CsaV3_1G005960/CsaV3_1G035920/CsaV3_2G001570/CsaV3_2G013320/CsaV3_2G030420/CsaV3_3G007170/CsaV3_3G007840/CsaV3_3G010470/CsaV3_3G021780/CsaV3_3G035920/CsaV3_4G037690/CsaV3_5G029170/CsaV3_5G034810/CsaV3_5G036470/CsaV3_6G040330/CsaV3_6G040390/CsaV3_6G040430/CsaV3_6G048680/CsaV3_6G049050/CsaV3_7G022930	CsaV3_1G003090/CsaV3_1G005960/CsaV3_1G035920/CsaV3_2G001570/CsaV3_2G013320/CsaV3_2G030420/CsaV3_3G007170/CsaV3_3G007840/CsaV3_3G010470/CsaV3_3G021780/CsaV3_3G035920/CsaV3_4G037690/CsaV3_5G029170/CsaV3_5G034810/CsaV3_5G036470/CsaV3_6G040330/CsaV3_6G040390/CsaV3_6G040430/CsaV3_6G048680/CsaV3_6G049050/CsaV3_7G022930	21
BP	GO:0006284	base-excision repair	100260	13/6278	0.123141	0.722725	CsaV3_1G008250/CsaV3_3G044900/CsaV3_3G045200/CsaV3_5G033540/CsaV3_6G034200/CsaV3_6G046270/CsaV3_7G031900	CsaV3_1G008250/CsaV3_3G044900/CsaV3_3G045200/CsaV3_5G033540/CsaV3_6G034200/CsaV3_6G046270/CsaV3_7G031900	7
BP	GO:0006323	DNA packaging	100260	13/6278	0.123141	0.722725	CsaV3_1G005360/CsaV3_2G034670/CsaV3_4G000180/CsaV3_5G028310/CsaV3_5G037970/CsaV3_6G036780/CsaV3_6G044170	CsaV3_1G005360/CsaV3_2G034670/CsaV3_4G000180/CsaV3_5G028310/CsaV3_5G037970/CsaV3_6G036780/CsaV3_6G044170	7
BP	GO:0006720	isoprenoid metabolic process	100322	18/6278	0.131283	0.722725	CsaV3_2G001370/CsaV3_3G003490/CsaV3_3G006740/CsaV3_3G006930/CsaV3_4G022080/CsaV3_6G002810/CsaV3_6G005620/CsaV3_6G042470/CsaV3_7G010240	CsaV3_2G001370/CsaV3_3G003490/CsaV3_3G006740/CsaV3_3G006930/CsaV3_4G022080/CsaV3_6G002810/CsaV3_6G005620/CsaV3_6G042470/CsaV3_7G010240	9
BP	GO:0008299	isoprenoid biosynthetic process	100322	18/6278	0.131283	0.722725	CsaV3_2G001370/CsaV3_3G003490/CsaV3_3G006740/CsaV3_3G006930/CsaV3_4G022080/CsaV3_6G002810/CsaV3_6G005620/CsaV3_6G042470/CsaV3_7G010240	CsaV3_2G001370/CsaV3_3G003490/CsaV3_3G006740/CsaV3_3G006930/CsaV3_4G022080/CsaV3_6G002810/CsaV3_6G005620/CsaV3_6G042470/CsaV3_7G010240	9
BP	GO:0006096	glycolytic process	13/2174	28/6278	0.132893	0.722725	CsaV3_1G003090/CsaV3_1G035920/CsaV3_2G013320/CsaV3_2G030420/CsaV3_3G021780/CsaV3_3G035920/CsaV3_4G037690/CsaV3_5G029170/CsaV3_6G040330/CsaV3_6G040390/CsaV3_6G040430/CsaV3_6G048680/CsaV3_7G022930	CsaV3_1G003090/CsaV3_1G035920/CsaV3_2G013320/CsaV3_2G030420/CsaV3_3G021780/CsaV3_3G035920/CsaV3_4G037690/CsaV3_5G029170/CsaV3_6G040330/CsaV3_6G040390/CsaV3_6G040430/CsaV3_6G048680/CsaV3_7G022930	13
BP	GO:0006757	ATP generation from ADP	13/2174	28/6278	0.132893	0.722725	CsaV3_1G003090/CsaV3_1G035920/CsaV3_2G013320/CsaV3_2G030420/CsaV3_3G021780/CsaV3_3G035920/CsaV3_4G037690/CsaV3_5G029170/CsaV3_6G040330/CsaV3_6G040390/CsaV3_6G040430/CsaV3_6G048680/CsaV3_7G022930	CsaV3_1G003090/CsaV3_1G035920/CsaV3_2G013320/CsaV3_2G030420/CsaV3_3G021780/CsaV3_3G035920/CsaV3_4G037690/CsaV3_5G029170/CsaV3_6G040330/CsaV3_6G040390/CsaV3_6G040430/CsaV3_6G048680/CsaV3_7G022930	13
BP	GO:0009135	purine nucleoside diphosphate metabolic process	13/2174	28/6278	0.132893	0.722725	CsaV3_1G003090/CsaV3_1G035920/CsaV3_2G013320/CsaV3_2G030420/CsaV3_3G021780/CsaV3_3G035920/CsaV3_4G037690/CsaV3_5G029170/CsaV3_6G040330/CsaV3_6G040390/CsaV3_6G040430/CsaV3_6G048680/CsaV3_7G022930	CsaV3_1G003090/CsaV3_1G035920/CsaV3_2G013320/CsaV3_2G030420/CsaV3_3G021780/CsaV3_3G035920/CsaV3_4G037690/CsaV3_5G029170/CsaV3_6G040330/CsaV3_6G040390/CsaV3_6G040430/CsaV3_6G048680/CsaV3_7G022930	13
BP	GO:0009179	purine ribonucleoside diphosphate metabolic process	13/2174	28/6278	0.132893	0.722725	CsaV3_1G003090/CsaV3_1G035920/CsaV3_2G013320/CsaV3_2G030420/CsaV3_3G021780/CsaV3_3G035920/CsaV3_4G037690/CsaV3_5G029170/CsaV3_6G040330/CsaV3_6G040390/CsaV3_6G040430/CsaV3_6G048680/CsaV3_7G022930	CsaV3_1G003090/CsaV3_1G035920/CsaV3_2G013320/CsaV3_2G030420/CsaV3_3G021780/CsaV3_3G035920/CsaV3_4G037690/CsaV3_5G029170/CsaV3_6G040330/CsaV3_6G040390/CsaV3_6G040430/CsaV3_6G048680/CsaV3_7G022930	13
BP	GO:0009185	ribonucleoside diphosphate metabolic process	13/2174	28/6278	0.132893	0.722725	CsaV3_1G003090/CsaV3_1G035920/CsaV3_2G013320/CsaV3_2G030420/CsaV3_3G021780/CsaV3_3G035920/CsaV3_4G037690/CsaV3_5G029170/CsaV3_6G040330/CsaV3_6G040390/CsaV3_6G040430/CsaV3_6G048680/CsaV3_7G022930	CsaV3_1G003090/CsaV3_1G035920/CsaV3_2G013320/CsaV3_2G030420/CsaV3_3G021780/CsaV3_3G035920/CsaV3_4G037690/CsaV3_5G029170/CsaV3_6G040330/CsaV3_6G040390/CsaV3_6G040430/CsaV3_6G048680/CsaV3_7G022930	13
BP	GO:0042866	pyruvate biosynthetic process	13/2174	28/6278	0.132893	0.722725	CsaV3_1G003090/CsaV3_1G035920/CsaV3_2G013320/CsaV3_2G030420/CsaV3_3G021780/CsaV3_3G035920/CsaV3_4G037690/CsaV3_5G029170/CsaV3_6G040330/CsaV3_6G040390/CsaV3_6G040430/CsaV3_6G048680/CsaV3_7G022930	CsaV3_1G003090/CsaV3_1G035920/CsaV3_2G013320/CsaV3_2G030420/CsaV3_3G021780/CsaV3_3G035920/CsaV3_4G037690/CsaV3_5G029170/CsaV3_6G040330/CsaV3_6G040390/CsaV3_6G040430/CsaV3_6G048680/CsaV3_7G022930	13
BP	GO:0046031	ADP metabolic process	13/2174	28/6278	0.132893	0.722725	CsaV3_1G003090/CsaV3_1G035920/CsaV3_2G013320/CsaV3_2G030420/CsaV3_3G021780/CsaV3_3G035920/CsaV3_4G037690/CsaV3_5G029170/CsaV3_6G040330/CsaV3_6G040390/CsaV3_6G040430/CsaV3_6G048680/CsaV3_7G022930	CsaV3_1G003090/CsaV3_1G035920/CsaV3_2G013320/CsaV3_2G030420/CsaV3_3G021780/CsaV3_3G035920/CsaV3_4G037690/CsaV3_5G029170/CsaV3_6G040330/CsaV3_6G040390/CsaV3_6G040430/CsaV3_6G048680/CsaV3_7G022930	13
BP	GO:0006754	ATP biosynthetic process	20/2174	46/6278	0.133951	0.722725	CsaV3_1G003090/CsaV3_1G005960/CsaV3_1G035920/CsaV3_2G001570/CsaV3_2G013320/CsaV3_2G030420/CsaV3_3G007840/CsaV3_3G010470/CsaV3_3G021780/CsaV3_3G035920/CsaV3_4G037690/CsaV3_5G029170/CsaV3_5G034810/CsaV3_5G036470/CsaV3_6G040330/CsaV3_6G040390/CsaV3_6G040430/CsaV3_6G048680/CsaV3_6G049050/CsaV3_7G022930	CsaV3_1G003090/CsaV3_1G005960/CsaV3_1G035920/CsaV3_2G001570/CsaV3_2G013320/CsaV3_2G030420/CsaV3_3G007840/CsaV3_3G010470/CsaV3_3G021780/CsaV3_3G035920/CsaV3_4G037690/CsaV3_5G029170/CsaV3_5G034810/CsaV3_5G036470/CsaV3_6G040330/CsaV3_6G040390/CsaV3_6G040430/CsaV3_6G048680/CsaV3_6G049050/CsaV3_7G022930	20
BP	GO:0006733	oxidoreduction coenzyme metabolic process	18/2174	41/6278	0.138883	0.722725	CsaV3_1G003090/CsaV3_1G008930/CsaV3_1G035920/CsaV3_1G037750/CsaV3_1G042920/CsaV3_2G013320/CsaV3_2G030420/CsaV3_3G021780/CsaV3_3G035920/CsaV3_4G006330/CsaV3_4G037690/CsaV3_5G028490/CsaV3_5G029170/CsaV3_6G040330/CsaV3_6G040390/CsaV3_6G040430/CsaV3_6G048680/CsaV3_7G022930	CsaV3_1G003090/CsaV3_1G008930/CsaV3_1G035920/CsaV3_1G037750/CsaV3_1G042920/CsaV3_2G013320/CsaV3_2G030420/CsaV3_3G021780/CsaV3_3G035920/CsaV3_4G006330/CsaV3_4G037690/CsaV3_5G028490/CsaV3_5G029170/CsaV3_6G040330/CsaV3_6G040390/CsaV3_6G040430/CsaV3_6G048680/CsaV3_7G022930	18
BP	GO:0009084	glutamine family amino acid biosynthetic process	100230	1599338	0.142289	0.722725	CsaV3_1G000670/CsaV3_3G013840/CsaV3_3G021030/CsaV3_3G027930/CsaV3_5G023920/CsaV3_7G030560	CsaV3_1G000670/CsaV3_3G013840/CsaV3_3G021030/CsaV3_3G027930/CsaV3_5G023920/CsaV3_7G030560	6
BP	GO:0022406	membrane docking	100230	1599338	0.142289	0.722725	CsaV3_5G036050/CsaV3_6G006180/CsaV3_6G030940/CsaV3_6G036710/CsaV3_7G001760/CsaV3_7G029390	CsaV3_5G036050/CsaV3_6G006180/CsaV3_6G030940/CsaV3_6G036710/CsaV3_7G001760/CsaV3_7G029390	6
BP	GO:0048278	vesicle docking	100230	1599338	0.142289	0.722725	CsaV3_5G036050/CsaV3_6G006180/CsaV3_6G030940/CsaV3_6G036710/CsaV3_7G001760/CsaV3_7G029390	CsaV3_5G036050/CsaV3_6G006180/CsaV3_6G030940/CsaV3_6G036710/CsaV3_7G001760/CsaV3_7G029390	6
BP	GO:0051640	organelle localization	100230	1599338	0.142289	0.722725	CsaV3_5G036050/CsaV3_6G006180/CsaV3_6G030940/CsaV3_6G036710/CsaV3_7G001760/CsaV3_7G029390	CsaV3_5G036050/CsaV3_6G006180/CsaV3_6G030940/CsaV3_6G036710/CsaV3_7G001760/CsaV3_7G029390	6
BP	GO:0140056	organelle localization by membrane tethering	100230	1599338	0.142289	0.722725	CsaV3_5G036050/CsaV3_6G006180/CsaV3_6G030940/CsaV3_6G036710/CsaV3_7G001760/CsaV3_7G029390	CsaV3_5G036050/CsaV3_6G006180/CsaV3_6G030940/CsaV3_6G036710/CsaV3_7G001760/CsaV3_7G029390	6
BP	GO:1901607	alpha-amino acid biosynthetic process	16/2174	36/6278	0.14362	0.722725	CsaV3_1G000670/CsaV3_1G037190/CsaV3_3G013840/CsaV3_3G021030/CsaV3_3G027930/CsaV3_3G040500/CsaV3_3G043020/CsaV3_4G024670/CsaV3_5G023920/CsaV3_5G029840/CsaV3_6G014760/CsaV3_6G016090/CsaV3_6G047800/CsaV3_7G018620/CsaV3_7G021780/CsaV3_7G030560	CsaV3_1G000670/CsaV3_1G037190/CsaV3_3G013840/CsaV3_3G021030/CsaV3_3G027930/CsaV3_3G040500/CsaV3_3G043020/CsaV3_4G024670/CsaV3_5G023920/CsaV3_5G029840/CsaV3_6G014760/CsaV3_6G016090/CsaV3_6G047800/CsaV3_7G018620/CsaV3_7G021780/CsaV3_7G030560	16
BP	GO:0009127	purine nucleoside monophosphate biosynthetic process	21/2174	49/6278	0.143835	0.722725	CsaV3_1G003090/CsaV3_1G005960/CsaV3_1G035920/CsaV3_2G001570/CsaV3_2G013320/CsaV3_2G030420/CsaV3_3G007840/CsaV3_3G010470/CsaV3_3G021780/CsaV3_3G035920/CsaV3_4G037690/CsaV3_5G002770/CsaV3_5G029170/CsaV3_5G034810/CsaV3_5G036470/CsaV3_6G040330/CsaV3_6G040390/CsaV3_6G040430/CsaV3_6G048680/CsaV3_6G049050/CsaV3_7G022930	CsaV3_1G003090/CsaV3_1G005960/CsaV3_1G035920/CsaV3_2G001570/CsaV3_2G013320/CsaV3_2G030420/CsaV3_3G007840/CsaV3_3G010470/CsaV3_3G021780/CsaV3_3G035920/CsaV3_4G037690/CsaV3_5G002770/CsaV3_5G029170/CsaV3_5G034810/CsaV3_5G036470/CsaV3_6G040330/CsaV3_6G040390/CsaV3_6G040430/CsaV3_6G048680/CsaV3_6G049050/CsaV3_7G022930	21
BP	GO:0009156	ribonucleoside monophosphate biosynthetic process	21/2174	49/6278	0.143835	0.722725	CsaV3_1G003090/CsaV3_1G005960/CsaV3_1G035920/CsaV3_2G001570/CsaV3_2G013320/CsaV3_2G030420/CsaV3_3G007840/CsaV3_3G010470/CsaV3_3G021780/CsaV3_3G035920/CsaV3_4G037690/CsaV3_5G002770/CsaV3_5G029170/CsaV3_5G034810/CsaV3_5G036470/CsaV3_6G040330/CsaV3_6G040390/CsaV3_6G040430/CsaV3_6G048680/CsaV3_6G049050/CsaV3_7G022930	CsaV3_1G003090/CsaV3_1G005960/CsaV3_1G035920/CsaV3_2G001570/CsaV3_2G013320/CsaV3_2G030420/CsaV3_3G007840/CsaV3_3G010470/CsaV3_3G021780/CsaV3_3G035920/CsaV3_4G037690/CsaV3_5G002770/CsaV3_5G029170/CsaV3_5G034810/CsaV3_5G036470/CsaV3_6G040330/CsaV3_6G040390/CsaV3_6G040430/CsaV3_6G048680/CsaV3_6G049050/CsaV3_7G022930	21
BP	GO:0009168	purine ribonucleoside monophosphate biosynthetic process	21/2174	49/6278	0.143835	0.722725	CsaV3_1G003090/CsaV3_1G005960/CsaV3_1G035920/CsaV3_2G001570/CsaV3_2G013320/CsaV3_2G030420/CsaV3_3G007840/CsaV3_3G010470/CsaV3_3G021780/CsaV3_3G035920/CsaV3_4G037690/CsaV3_5G002770/CsaV3_5G029170/CsaV3_5G034810/CsaV3_5G036470/CsaV3_6G040330/CsaV3_6G040390/CsaV3_6G040430/CsaV3_6G048680/CsaV3_6G049050/CsaV3_7G022930	CsaV3_1G003090/CsaV3_1G005960/CsaV3_1G035920/CsaV3_2G001570/CsaV3_2G013320/CsaV3_2G030420/CsaV3_3G007840/CsaV3_3G010470/CsaV3_3G021780/CsaV3_3G035920/CsaV3_4G037690/CsaV3_5G002770/CsaV3_5G029170/CsaV3_5G034810/CsaV3_5G036470/CsaV3_6G040330/CsaV3_6G040390/CsaV3_6G040430/CsaV3_6G048680/CsaV3_6G049050/CsaV3_7G022930	21
BP	GO:0044085	cellular component biogenesis	42/2174	105/6278	0.144091	0.722725	CsaV3_1G000640/CsaV3_1G003410/CsaV3_1G005360/CsaV3_1G008530/CsaV3_1G010840/CsaV3_1G028940/CsaV3_1G042700/CsaV3_1G043050/CsaV3_2G006740/CsaV3_2G008550/CsaV3_2G014840/CsaV3_2G015360/CsaV3_3G003930/CsaV3_3G005970/CsaV3_3G017360/CsaV3_3G043520/CsaV3_3G046940/CsaV3_4G000180/CsaV3_4G010070/CsaV3_4G031280/CsaV3_5G005970/CsaV3_5G006380/CsaV3_5G008980/CsaV3_5G025150/CsaV3_5G028310/CsaV3_5G029830/CsaV3_5G0…	CsaV3_1G000640/CsaV3_1G003410/CsaV3_1G005360/CsaV3_1G008530/CsaV3_1G010840/CsaV3_1G028940/CsaV3_1G042700/CsaV3_1G043050/CsaV3_2G006740/CsaV3_2G008550/CsaV3_2G014840/CsaV3_2G015360/CsaV3_3G003930/CsaV3_3G005970/CsaV3_3G017360/CsaV3_3G043520/CsaV3_3G046940/CsaV3_4G000180/CsaV3_4G010070/CsaV3_4G031280/CsaV3_5G005970/CsaV3_5G006380/CsaV3_5G008980/CsaV3_5G025150/CsaV3_5G028310/CsaV3_5G029830/CsaV3_5G0…	42
BP	GO:0071103	DNA conformation change	100352	21/6278	0.153055	0.722725	CsaV3_1G005360/CsaV3_2G034670/CsaV3_3G032050/CsaV3_3G047220/CsaV3_4G000180/CsaV3_5G028310/CsaV3_5G037970/CsaV3_6G035790/CsaV3_6G036780/CsaV3_6G044170	CsaV3_1G005360/CsaV3_2G034670/CsaV3_3G032050/CsaV3_3G047220/CsaV3_4G000180/CsaV3_5G028310/CsaV3_5G037970/CsaV3_6G035790/CsaV3_6G036780/CsaV3_6G044170	10
BP	GO:0016051	carbohydrate biosynthetic process	28/2174	68/6278	0.155568	0.722725	CsaV3_1G001640/CsaV3_1G003390/CsaV3_1G022900/CsaV3_1G042280/CsaV3_1G042290/CsaV3_2G018300/CsaV3_2G030420/CsaV3_2G034720/CsaV3_2G036170/CsaV3_2G036620/CsaV3_3G016150/CsaV3_3G038290/CsaV3_3G046510/CsaV3_4G001040/CsaV3_4G006800/CsaV3_4G011810/CsaV3_5G031700/CsaV3_6G002560/CsaV3_6G033720/CsaV3_6G044640/CsaV3_6G045560/CsaV3_6G051060/CsaV3_7G002510/CsaV3_7G011470/CsaV3_7G011490/CsaV3_7G031050/CsaV3_7G0…	CsaV3_1G001640/CsaV3_1G003390/CsaV3_1G022900/CsaV3_1G042280/CsaV3_1G042290/CsaV3_2G018300/CsaV3_2G030420/CsaV3_2G034720/CsaV3_2G036170/CsaV3_2G036620/CsaV3_3G016150/CsaV3_3G038290/CsaV3_3G046510/CsaV3_4G001040/CsaV3_4G006800/CsaV3_4G011810/CsaV3_5G031700/CsaV3_6G002560/CsaV3_6G033720/CsaV3_6G044640/CsaV3_6G045560/CsaV3_6G051060/CsaV3_7G002510/CsaV3_7G011470/CsaV3_7G011490/CsaV3_7G031050/CsaV3_7G0…	28
BP	GO:0019359	nicotinamide nucleotide biosynthetic process	15/2174	34/6278	0.161999	0.722725	CsaV3_1G003090/CsaV3_1G008930/CsaV3_1G035920/CsaV3_1G042920/CsaV3_2G013320/CsaV3_2G030420/CsaV3_3G021780/CsaV3_3G035920/CsaV3_4G037690/CsaV3_5G029170/CsaV3_6G040330/CsaV3_6G040390/CsaV3_6G040430/CsaV3_6G048680/CsaV3_7G022930	CsaV3_1G003090/CsaV3_1G008930/CsaV3_1G035920/CsaV3_1G042920/CsaV3_2G013320/CsaV3_2G030420/CsaV3_3G021780/CsaV3_3G035920/CsaV3_4G037690/CsaV3_5G029170/CsaV3_6G040330/CsaV3_6G040390/CsaV3_6G040430/CsaV3_6G048680/CsaV3_7G022930	15
BP	GO:0019363	pyridine nucleotide biosynthetic process	15/2174	34/6278	0.161999	0.722725	CsaV3_1G003090/CsaV3_1G008930/CsaV3_1G035920/CsaV3_1G042920/CsaV3_2G013320/CsaV3_2G030420/CsaV3_3G021780/CsaV3_3G035920/CsaV3_4G037690/CsaV3_5G029170/CsaV3_6G040330/CsaV3_6G040390/CsaV3_6G040430/CsaV3_6G048680/CsaV3_7G022930	CsaV3_1G003090/CsaV3_1G008930/CsaV3_1G035920/CsaV3_1G042920/CsaV3_2G013320/CsaV3_2G030420/CsaV3_3G021780/CsaV3_3G035920/CsaV3_4G037690/CsaV3_5G029170/CsaV3_6G040330/CsaV3_6G040390/CsaV3_6G040430/CsaV3_6G048680/CsaV3_7G022930	15
BP	GO:0009124	nucleoside monophosphate biosynthetic process	21/2174	50/6278	0.170482	0.722725	CsaV3_1G003090/CsaV3_1G005960/CsaV3_1G035920/CsaV3_2G001570/CsaV3_2G013320/CsaV3_2G030420/CsaV3_3G007840/CsaV3_3G010470/CsaV3_3G021780/CsaV3_3G035920/CsaV3_4G037690/CsaV3_5G002770/CsaV3_5G029170/CsaV3_5G034810/CsaV3_5G036470/CsaV3_6G040330/CsaV3_6G040390/CsaV3_6G040430/CsaV3_6G048680/CsaV3_6G049050/CsaV3_7G022930	CsaV3_1G003090/CsaV3_1G005960/CsaV3_1G035920/CsaV3_2G001570/CsaV3_2G013320/CsaV3_2G030420/CsaV3_3G007840/CsaV3_3G010470/CsaV3_3G021780/CsaV3_3G035920/CsaV3_4G037690/CsaV3_5G002770/CsaV3_5G029170/CsaV3_5G034810/CsaV3_5G036470/CsaV3_6G040330/CsaV3_6G040390/CsaV3_6G040430/CsaV3_6G048680/CsaV3_6G049050/CsaV3_7G022930	21
BP	GO:0006333	chromatin assembly or disassembly	100260	14/6278	0.1754	0.722725	CsaV3_1G005360/CsaV3_4G000180/CsaV3_5G028310/CsaV3_5G028660/CsaV3_5G037970/CsaV3_6G036780/CsaV3_6G044170	CsaV3_1G005360/CsaV3_4G000180/CsaV3_5G028310/CsaV3_5G028660/CsaV3_5G037970/CsaV3_6G036780/CsaV3_6G044170	7
BP	GO:0022402	cell cycle process	100260	14/6278	0.1754	0.722725	CsaV3_2G034670/CsaV3_4G010070/CsaV3_5G025150/CsaV3_5G033110/CsaV3_6G015340/CsaV3_7G008680/CsaV3_7G021840	CsaV3_2G034670/CsaV3_4G010070/CsaV3_5G025150/CsaV3_5G033110/CsaV3_6G015340/CsaV3_7G008680/CsaV3_7G021840	7
BP	GO:0033014	tetrapyrrole biosynthetic process	100260	14/6278	0.1754	0.722725	CsaV3_1G000080/CsaV3_1G028580/CsaV3_2G028140/CsaV3_2G030530/CsaV3_4G007220/CsaV3_4G008050/CsaV3_6G013410	CsaV3_1G000080/CsaV3_1G028580/CsaV3_2G028140/CsaV3_2G030530/CsaV3_4G007220/CsaV3_4G008050/CsaV3_6G013410	7
BP	GO:0044087	regulation of cellular component biogenesis	100260	14/6278	0.1754	0.722725	CsaV3_1G043050/CsaV3_2G006740/CsaV3_3G003930/CsaV3_4G031280/CsaV3_5G025150/CsaV3_5G033110/CsaV3_6G004830	CsaV3_1G043050/CsaV3_2G006740/CsaV3_3G003930/CsaV3_4G031280/CsaV3_5G025150/CsaV3_5G033110/CsaV3_6G004830	7
BP	GO:0051128	regulation of cellular component organization	100322	19/6278	0.175924	0.722725	CsaV3_1G028950/CsaV3_1G043050/CsaV3_2G006740/CsaV3_3G003930/CsaV3_4G031280/CsaV3_5G025150/CsaV3_5G033100/CsaV3_5G033110/CsaV3_6G004830	CsaV3_1G028950/CsaV3_1G043050/CsaV3_2G006740/CsaV3_3G003930/CsaV3_4G031280/CsaV3_5G025150/CsaV3_5G033100/CsaV3_5G033110/CsaV3_6G004830	9
BP	GO:0046434	organophosphate catabolic process	14/2174	32/6278	0.182863	0.722725	CsaV3_1G003090/CsaV3_1G035920/CsaV3_1G041450/CsaV3_2G013320/CsaV3_2G030420/CsaV3_3G021780/CsaV3_3G035920/CsaV3_4G037690/CsaV3_5G029170/CsaV3_6G040330/CsaV3_6G040390/CsaV3_6G040430/CsaV3_6G048680/CsaV3_7G022930	CsaV3_1G003090/CsaV3_1G035920/CsaV3_1G041450/CsaV3_2G013320/CsaV3_2G030420/CsaV3_3G021780/CsaV3_3G035920/CsaV3_4G037690/CsaV3_5G029170/CsaV3_6G040330/CsaV3_6G040390/CsaV3_6G040430/CsaV3_6G048680/CsaV3_7G022930	14
BP	GO:0035556	intracellular signal transduction	43/2174	110/6278	0.185855	0.722725	CsaV3_1G001860/CsaV3_1G004280/CsaV3_1G015390/CsaV3_1G029700/CsaV3_1G029790/CsaV3_1G036200/CsaV3_1G039330/CsaV3_1G044700/CsaV3_2G002140/CsaV3_2G009260/CsaV3_2G016070/CsaV3_2G017730/CsaV3_2G021030/CsaV3_2G024270/CsaV3_2G025170/CsaV3_2G031840/CsaV3_2G033620/CsaV3_2G034580/CsaV3_3G002400/CsaV3_3G006490/CsaV3_3G009610/CsaV3_3G010020/CsaV3_3G023600/CsaV3_3G031710/CsaV3_3G036220/CsaV3_3G040330/CsaV3_3G0…	CsaV3_1G001860/CsaV3_1G004280/CsaV3_1G015390/CsaV3_1G029700/CsaV3_1G029790/CsaV3_1G036200/CsaV3_1G039330/CsaV3_1G044700/CsaV3_2G002140/CsaV3_2G009260/CsaV3_2G016070/CsaV3_2G017730/CsaV3_2G021030/CsaV3_2G024270/CsaV3_2G025170/CsaV3_2G031840/CsaV3_2G033620/CsaV3_2G034580/CsaV3_3G002400/CsaV3_3G006490/CsaV3_3G009610/CsaV3_3G010020/CsaV3_3G023600/CsaV3_3G031710/CsaV3_3G036220/CsaV3_3G040330/CsaV3_3G0…	43
BP	GO:0006164	purine nucleotide biosynthetic process	23/2174	56/6278	0.189431	0.722725	CsaV3_1G003090/CsaV3_1G005960/CsaV3_1G010170/CsaV3_1G035920/CsaV3_2G001570/CsaV3_2G013320/CsaV3_2G030420/CsaV3_3G007170/CsaV3_3G007840/CsaV3_3G010470/CsaV3_3G021780/CsaV3_3G035920/CsaV3_4G037690/CsaV3_5G002770/CsaV3_5G029170/CsaV3_5G034810/CsaV3_5G036470/CsaV3_6G040330/CsaV3_6G040390/CsaV3_6G040430/CsaV3_6G048680/CsaV3_6G049050/CsaV3_7G022930	CsaV3_1G003090/CsaV3_1G005960/CsaV3_1G010170/CsaV3_1G035920/CsaV3_2G001570/CsaV3_2G013320/CsaV3_2G030420/CsaV3_3G007170/CsaV3_3G007840/CsaV3_3G010470/CsaV3_3G021780/CsaV3_3G035920/CsaV3_4G037690/CsaV3_5G002770/CsaV3_5G029170/CsaV3_5G034810/CsaV3_5G036470/CsaV3_6G040330/CsaV3_6G040390/CsaV3_6G040430/CsaV3_6G048680/CsaV3_6G049050/CsaV3_7G022930	23
BP	GO:0016192	vesicle-mediated transport	45/2174	116/6278	0.196117	0.722725	CsaV3_1G005990/CsaV3_1G006710/CsaV3_1G009630/CsaV3_1G014870/CsaV3_1G027860/CsaV3_1G031570/CsaV3_1G033630/CsaV3_2G014650/CsaV3_2G015150/CsaV3_2G019650/CsaV3_2G035100/CsaV3_3G001490/CsaV3_3G028850/CsaV3_3G030800/CsaV3_3G038070/CsaV3_3G041240/CsaV3_3G046300/CsaV3_3G047380/CsaV3_4G003550/CsaV3_4G013350/CsaV3_4G026140/CsaV3_5G000990/CsaV3_5G010240/CsaV3_5G025750/CsaV3_5G036050/CsaV3_5G038260/CsaV3_6G0…	CsaV3_1G005990/CsaV3_1G006710/CsaV3_1G009630/CsaV3_1G014870/CsaV3_1G027860/CsaV3_1G031570/CsaV3_1G033630/CsaV3_2G014650/CsaV3_2G015150/CsaV3_2G019650/CsaV3_2G035100/CsaV3_3G001490/CsaV3_3G028850/CsaV3_3G030800/CsaV3_3G038070/CsaV3_3G041240/CsaV3_3G046300/CsaV3_3G047380/CsaV3_4G003550/CsaV3_4G013350/CsaV3_4G026140/CsaV3_5G000990/CsaV3_5G010240/CsaV3_5G025750/CsaV3_5G036050/CsaV3_5G038260/CsaV3_6G0…	45
BP	GO:0018193	peptidyl-amino acid modification	15/2174	35/6278	0.196913	0.722725	CsaV3_2G010590/CsaV3_2G014400/CsaV3_2G015950/CsaV3_2G031860/CsaV3_3G006070/CsaV3_3G010660/CsaV3_3G011580/CsaV3_3G027790/CsaV3_3G040650/CsaV3_3G042370/CsaV3_5G018650/CsaV3_5G036900/CsaV3_6G007420/CsaV3_6G007990/CsaV3_7G030050	CsaV3_2G010590/CsaV3_2G014400/CsaV3_2G015950/CsaV3_2G031860/CsaV3_3G006070/CsaV3_3G010660/CsaV3_3G011580/CsaV3_3G027790/CsaV3_3G040650/CsaV3_3G042370/CsaV3_5G018650/CsaV3_5G036900/CsaV3_6G007420/CsaV3_6G007990/CsaV3_7G030050	15
BP	GO:0009116	nucleoside metabolic process	100352	22/6278	0.197443	0.722725	CsaV3_1G045800/CsaV3_2G032170/CsaV3_3G002990/CsaV3_3G007170/CsaV3_3G015600/CsaV3_4G000980/CsaV3_4G008710/CsaV3_5G002770/CsaV3_6G004900/CsaV3_6G038100	CsaV3_1G045800/CsaV3_2G032170/CsaV3_3G002990/CsaV3_3G007170/CsaV3_3G015600/CsaV3_4G000980/CsaV3_4G008710/CsaV3_5G002770/CsaV3_6G004900/CsaV3_6G038100	10
BP	GO:1901657	glycosyl compound metabolic process	100352	22/6278	0.197443	0.722725	CsaV3_1G045800/CsaV3_2G032170/CsaV3_3G002990/CsaV3_3G007170/CsaV3_3G015600/CsaV3_4G000980/CsaV3_4G008710/CsaV3_5G002770/CsaV3_6G004900/CsaV3_6G038100	CsaV3_1G045800/CsaV3_2G032170/CsaV3_3G002990/CsaV3_3G007170/CsaV3_3G015600/CsaV3_4G000980/CsaV3_4G008710/CsaV3_5G002770/CsaV3_6G004900/CsaV3_6G038100	10
BP	GO:0072524	pyridine-containing compound metabolic process	18/2174	43/6278	0.199367	0.722725	CsaV3_1G003090/CsaV3_1G008930/CsaV3_1G035920/CsaV3_1G037750/CsaV3_1G042920/CsaV3_2G013320/CsaV3_2G030420/CsaV3_3G021780/CsaV3_3G035920/CsaV3_4G006330/CsaV3_4G037690/CsaV3_5G028490/CsaV3_5G029170/CsaV3_6G040330/CsaV3_6G040390/CsaV3_6G040430/CsaV3_6G048680/CsaV3_7G022930	CsaV3_1G003090/CsaV3_1G008930/CsaV3_1G035920/CsaV3_1G037750/CsaV3_1G042920/CsaV3_2G013320/CsaV3_2G030420/CsaV3_3G021780/CsaV3_3G035920/CsaV3_4G006330/CsaV3_4G037690/CsaV3_5G028490/CsaV3_5G029170/CsaV3_6G040330/CsaV3_6G040390/CsaV3_6G040430/CsaV3_6G048680/CsaV3_7G022930	18
BP	GO:0006091	generation of precursor metabolites and energy	21/2174	51/6278	0.199542	0.722725	CsaV3_1G003090/CsaV3_1G035920/CsaV3_2G013320/CsaV3_2G030420/CsaV3_3G017590/CsaV3_3G021780/CsaV3_3G035920/CsaV3_4G001010/CsaV3_4G033150/CsaV3_4G037690/CsaV3_5G029170/CsaV3_5G030320/CsaV3_6G040330/CsaV3_6G040390/CsaV3_6G040430/CsaV3_6G044180/CsaV3_6G048680/CsaV3_7G004070/CsaV3_7G004300/CsaV3_7G005670/CsaV3_7G022930	CsaV3_1G003090/CsaV3_1G035920/CsaV3_2G013320/CsaV3_2G030420/CsaV3_3G017590/CsaV3_3G021780/CsaV3_3G035920/CsaV3_4G001010/CsaV3_4G033150/CsaV3_4G037690/CsaV3_5G029170/CsaV3_5G030320/CsaV3_6G040330/CsaV3_6G040390/CsaV3_6G040430/CsaV3_6G044180/CsaV3_6G048680/CsaV3_7G004070/CsaV3_7G004300/CsaV3_7G005670/CsaV3_7G022930	21
BP	GO:0044270	cellular nitrogen compound catabolic process	21/2174	51/6278	0.199542	0.722725	CsaV3_1G003090/CsaV3_1G035920/CsaV3_1G041450/CsaV3_2G013320/CsaV3_2G013440/CsaV3_2G030420/CsaV3_3G021780/CsaV3_3G035920/CsaV3_4G034140/CsaV3_4G037690/CsaV3_5G025230/CsaV3_5G029170/CsaV3_5G030450/CsaV3_5G034420/CsaV3_6G014380/CsaV3_6G040330/CsaV3_6G040390/CsaV3_6G040430/CsaV3_6G048680/CsaV3_7G008280/CsaV3_7G022930	CsaV3_1G003090/CsaV3_1G035920/CsaV3_1G041450/CsaV3_2G013320/CsaV3_2G013440/CsaV3_2G030420/CsaV3_3G021780/CsaV3_3G035920/CsaV3_4G034140/CsaV3_4G037690/CsaV3_5G025230/CsaV3_5G029170/CsaV3_5G030450/CsaV3_5G034420/CsaV3_6G014380/CsaV3_6G040330/CsaV3_6G040390/CsaV3_6G040430/CsaV3_6G048680/CsaV3_7G008280/CsaV3_7G022930	21
BP	GO:1901615	organic hydroxy compound metabolic process	100291	17/6278	0.20296	0.722725	CsaV3_1G004890/CsaV3_2G001660/CsaV3_2G036580/CsaV3_3G001540/CsaV3_3G023420/CsaV3_3G048980/CsaV3_5G004930/CsaV3_UNG190490	CsaV3_1G004890/CsaV3_2G001660/CsaV3_2G036580/CsaV3_3G001540/CsaV3_3G023420/CsaV3_3G048980/CsaV3_5G004930/CsaV3_UNG190490	8
BP	GO:0009165	nucleotide biosynthetic process	28/2174	70/6278	0.204003	0.722725	CsaV3_1G003090/CsaV3_1G005960/CsaV3_1G008930/CsaV3_1G010170/CsaV3_1G016970/CsaV3_1G035920/CsaV3_1G042920/CsaV3_2G001570/CsaV3_2G013320/CsaV3_2G030420/CsaV3_3G007170/CsaV3_3G007840/CsaV3_3G010470/CsaV3_3G021780/CsaV3_3G035920/CsaV3_4G037690/CsaV3_5G002770/CsaV3_5G029170/CsaV3_5G034810/CsaV3_5G036470/CsaV3_6G040330/CsaV3_6G040390/CsaV3_6G040430/CsaV3_6G048680/CsaV3_6G049050/CsaV3_7G022930/CsaV3_7G0…	CsaV3_1G003090/CsaV3_1G005960/CsaV3_1G008930/CsaV3_1G010170/CsaV3_1G016970/CsaV3_1G035920/CsaV3_1G042920/CsaV3_2G001570/CsaV3_2G013320/CsaV3_2G030420/CsaV3_3G007170/CsaV3_3G007840/CsaV3_3G010470/CsaV3_3G021780/CsaV3_3G035920/CsaV3_4G037690/CsaV3_5G002770/CsaV3_5G029170/CsaV3_5G034810/CsaV3_5G036470/CsaV3_6G040330/CsaV3_6G040390/CsaV3_6G040430/CsaV3_6G048680/CsaV3_6G049050/CsaV3_7G022930/CsaV3_7G0…	28
BP	GO:1901293	nucleoside phosphate biosynthetic process	28/2174	70/6278	0.204003	0.722725	CsaV3_1G003090/CsaV3_1G005960/CsaV3_1G008930/CsaV3_1G010170/CsaV3_1G016970/CsaV3_1G035920/CsaV3_1G042920/CsaV3_2G001570/CsaV3_2G013320/CsaV3_2G030420/CsaV3_3G007170/CsaV3_3G007840/CsaV3_3G010470/CsaV3_3G021780/CsaV3_3G035920/CsaV3_4G037690/CsaV3_5G002770/CsaV3_5G029170/CsaV3_5G034810/CsaV3_5G036470/CsaV3_6G040330/CsaV3_6G040390/CsaV3_6G040430/CsaV3_6G048680/CsaV3_6G049050/CsaV3_7G022930/CsaV3_7G0…	CsaV3_1G003090/CsaV3_1G005960/CsaV3_1G008930/CsaV3_1G010170/CsaV3_1G016970/CsaV3_1G035920/CsaV3_1G042920/CsaV3_2G001570/CsaV3_2G013320/CsaV3_2G030420/CsaV3_3G007170/CsaV3_3G007840/CsaV3_3G010470/CsaV3_3G021780/CsaV3_3G035920/CsaV3_4G037690/CsaV3_5G002770/CsaV3_5G029170/CsaV3_5G034810/CsaV3_5G036470/CsaV3_6G040330/CsaV3_6G040390/CsaV3_6G040430/CsaV3_6G048680/CsaV3_6G049050/CsaV3_7G022930/CsaV3_7G0…	28
BP	GO:0006334	nucleosome assembly	100230	1599368	0.204457	0.722725	CsaV3_1G005360/CsaV3_4G000180/CsaV3_5G028310/CsaV3_5G037970/CsaV3_6G036780/CsaV3_6G044170	CsaV3_1G005360/CsaV3_4G000180/CsaV3_5G028310/CsaV3_5G037970/CsaV3_6G036780/CsaV3_6G044170	6
BP	GO:0031497	chromatin assembly	100230	1599368	0.204457	0.722725	CsaV3_1G005360/CsaV3_4G000180/CsaV3_5G028310/CsaV3_5G037970/CsaV3_6G036780/CsaV3_6G044170	CsaV3_1G005360/CsaV3_4G000180/CsaV3_5G028310/CsaV3_5G037970/CsaV3_6G036780/CsaV3_6G044170	6
BP	GO:0034728	nucleosome organization	100230	1599368	0.204457	0.722725	CsaV3_1G005360/CsaV3_4G000180/CsaV3_5G028310/CsaV3_5G037970/CsaV3_6G036780/CsaV3_6G044170	CsaV3_1G005360/CsaV3_4G000180/CsaV3_5G028310/CsaV3_5G037970/CsaV3_6G036780/CsaV3_6G044170	6
BP	GO:0044272	sulfur compound biosynthetic process	100230	1599368	0.204457	0.722725	CsaV3_3G040500/CsaV3_3G043020/CsaV3_5G012850/CsaV3_6G047800/CsaV3_7G018620/CsaV3_7G029140	CsaV3_3G040500/CsaV3_3G043020/CsaV3_5G012850/CsaV3_6G047800/CsaV3_7G018620/CsaV3_7G029140	6
BP	GO:0055086	nucleobase-containing small molecule metabolic process	43/2174	111/6278	0.205888	0.722725	CsaV3_1G003090/CsaV3_1G005960/CsaV3_1G008930/CsaV3_1G010170/CsaV3_1G016970/CsaV3_1G035920/CsaV3_1G037750/CsaV3_1G041450/CsaV3_1G042920/CsaV3_1G045800/CsaV3_2G001570/CsaV3_2G013320/CsaV3_2G028630/CsaV3_2G030420/CsaV3_2G032170/CsaV3_3G002990/CsaV3_3G007170/CsaV3_3G007840/CsaV3_3G010470/CsaV3_3G015600/CsaV3_3G021780/CsaV3_3G027630/CsaV3_3G035920/CsaV3_4G000980/CsaV3_4G006330/CsaV3_4G008710/CsaV3_4G0…	CsaV3_1G003090/CsaV3_1G005960/CsaV3_1G008930/CsaV3_1G010170/CsaV3_1G016970/CsaV3_1G035920/CsaV3_1G037750/CsaV3_1G041450/CsaV3_1G042920/CsaV3_1G045800/CsaV3_2G001570/CsaV3_2G013320/CsaV3_2G028630/CsaV3_2G030420/CsaV3_2G032170/CsaV3_3G002990/CsaV3_3G007170/CsaV3_3G007840/CsaV3_3G010470/CsaV3_3G015600/CsaV3_3G021780/CsaV3_3G027630/CsaV3_3G035920/CsaV3_4G000980/CsaV3_4G006330/CsaV3_4G008710/CsaV3_4G0…	43
BP	GO:0009152	purine ribonucleotide biosynthetic process	22/2174	54/6278	0.209176	0.722725	CsaV3_1G003090/CsaV3_1G005960/CsaV3_1G035920/CsaV3_2G001570/CsaV3_2G013320/CsaV3_2G030420/CsaV3_3G007170/CsaV3_3G007840/CsaV3_3G010470/CsaV3_3G021780/CsaV3_3G035920/CsaV3_4G037690/CsaV3_5G002770/CsaV3_5G029170/CsaV3_5G034810/CsaV3_5G036470/CsaV3_6G040330/CsaV3_6G040390/CsaV3_6G040430/CsaV3_6G048680/CsaV3_6G049050/CsaV3_7G022930	CsaV3_1G003090/CsaV3_1G005960/CsaV3_1G035920/CsaV3_2G001570/CsaV3_2G013320/CsaV3_2G030420/CsaV3_3G007170/CsaV3_3G007840/CsaV3_3G010470/CsaV3_3G021780/CsaV3_3G035920/CsaV3_4G037690/CsaV3_5G002770/CsaV3_5G029170/CsaV3_5G034810/CsaV3_5G036470/CsaV3_6G040330/CsaV3_6G040390/CsaV3_6G040430/CsaV3_6G048680/CsaV3_6G049050/CsaV3_7G022930	22
BP	GO:0009260	ribonucleotide biosynthetic process	22/2174	54/6278	0.209176	0.722725	CsaV3_1G003090/CsaV3_1G005960/CsaV3_1G035920/CsaV3_2G001570/CsaV3_2G013320/CsaV3_2G030420/CsaV3_3G007170/CsaV3_3G007840/CsaV3_3G010470/CsaV3_3G021780/CsaV3_3G035920/CsaV3_4G037690/CsaV3_5G002770/CsaV3_5G029170/CsaV3_5G034810/CsaV3_5G036470/CsaV3_6G040330/CsaV3_6G040390/CsaV3_6G040430/CsaV3_6G048680/CsaV3_6G049050/CsaV3_7G022930	CsaV3_1G003090/CsaV3_1G005960/CsaV3_1G035920/CsaV3_2G001570/CsaV3_2G013320/CsaV3_2G030420/CsaV3_3G007170/CsaV3_3G007840/CsaV3_3G010470/CsaV3_3G021780/CsaV3_3G035920/CsaV3_4G037690/CsaV3_5G002770/CsaV3_5G029170/CsaV3_5G034810/CsaV3_5G036470/CsaV3_6G040330/CsaV3_6G040390/CsaV3_6G040430/CsaV3_6G048680/CsaV3_6G049050/CsaV3_7G022930	22
BP	GO:0046390	ribose phosphate biosynthetic process	22/2174	54/6278	0.209176	0.722725	CsaV3_1G003090/CsaV3_1G005960/CsaV3_1G035920/CsaV3_2G001570/CsaV3_2G013320/CsaV3_2G030420/CsaV3_3G007170/CsaV3_3G007840/CsaV3_3G010470/CsaV3_3G021780/CsaV3_3G035920/CsaV3_4G037690/CsaV3_5G002770/CsaV3_5G029170/CsaV3_5G034810/CsaV3_5G036470/CsaV3_6G040330/CsaV3_6G040390/CsaV3_6G040430/CsaV3_6G048680/CsaV3_6G049050/CsaV3_7G022930	CsaV3_1G003090/CsaV3_1G005960/CsaV3_1G035920/CsaV3_2G001570/CsaV3_2G013320/CsaV3_2G030420/CsaV3_3G007170/CsaV3_3G007840/CsaV3_3G010470/CsaV3_3G021780/CsaV3_3G035920/CsaV3_4G037690/CsaV3_5G002770/CsaV3_5G029170/CsaV3_5G034810/CsaV3_5G036470/CsaV3_6G040330/CsaV3_6G040390/CsaV3_6G040430/CsaV3_6G048680/CsaV3_6G049050/CsaV3_7G022930	22
BP	GO:0051186	cofactor metabolic process	36/2174	92/6278	0.209667	0.722725	CsaV3_1G000080/CsaV3_1G003090/CsaV3_1G008530/CsaV3_1G008930/CsaV3_1G010840/CsaV3_1G035920/CsaV3_1G037750/CsaV3_1G042920/CsaV3_2G001680/CsaV3_2G008550/CsaV3_2G013320/CsaV3_2G013440/CsaV3_2G030420/CsaV3_3G009100/CsaV3_3G021780/CsaV3_3G035920/CsaV3_4G006330/CsaV3_4G007220/CsaV3_4G008050/CsaV3_4G013530/CsaV3_4G034140/CsaV3_4G037690/CsaV3_5G004930/CsaV3_5G008630/CsaV3_5G025230/CsaV3_5G028490/CsaV3_5G0…	CsaV3_1G000080/CsaV3_1G003090/CsaV3_1G008530/CsaV3_1G008930/CsaV3_1G010840/CsaV3_1G035920/CsaV3_1G037750/CsaV3_1G042920/CsaV3_2G001680/CsaV3_2G008550/CsaV3_2G013320/CsaV3_2G013440/CsaV3_2G030420/CsaV3_3G009100/CsaV3_3G021780/CsaV3_3G035920/CsaV3_4G006330/CsaV3_4G007220/CsaV3_4G008050/CsaV3_4G013530/CsaV3_4G034140/CsaV3_4G037690/CsaV3_5G004930/CsaV3_5G008630/CsaV3_5G025230/CsaV3_5G028490/CsaV3_5G0…	36
BP	GO:0043038	amino acid activation	16/2174	38/6278	0.209988	0.722725	CsaV3_1G003150/CsaV3_1G012830/CsaV3_1G038230/CsaV3_1G039630/CsaV3_2G008510/CsaV3_3G002020/CsaV3_3G014640/CsaV3_3G031480/CsaV3_3G048470/CsaV3_4G003190/CsaV3_5G002780/CsaV3_5G013970/CsaV3_5G015730/CsaV3_5G026430/CsaV3_6G008710/CsaV3_6G048760	CsaV3_1G003150/CsaV3_1G012830/CsaV3_1G038230/CsaV3_1G039630/CsaV3_2G008510/CsaV3_3G002020/CsaV3_3G014640/CsaV3_3G031480/CsaV3_3G048470/CsaV3_4G003190/CsaV3_5G002780/CsaV3_5G013970/CsaV3_5G015730/CsaV3_5G026430/CsaV3_6G008710/CsaV3_6G048760	16
BP	GO:0043039	tRNA aminoacylation	16/2174	38/6278	0.209988	0.722725	CsaV3_1G003150/CsaV3_1G012830/CsaV3_1G038230/CsaV3_1G039630/CsaV3_2G008510/CsaV3_3G002020/CsaV3_3G014640/CsaV3_3G031480/CsaV3_3G048470/CsaV3_4G003190/CsaV3_5G002780/CsaV3_5G013970/CsaV3_5G015730/CsaV3_5G026430/CsaV3_6G008710/CsaV3_6G048760	CsaV3_1G003150/CsaV3_1G012830/CsaV3_1G038230/CsaV3_1G039630/CsaV3_2G008510/CsaV3_3G002020/CsaV3_3G014640/CsaV3_3G031480/CsaV3_3G048470/CsaV3_4G003190/CsaV3_5G002780/CsaV3_5G013970/CsaV3_5G015730/CsaV3_5G026430/CsaV3_6G008710/CsaV3_6G048760	16
BP	GO:0072522	purine-containing compound biosynthetic process	23/2174	57/6278	0.21838	0.722725	CsaV3_1G003090/CsaV3_1G005960/CsaV3_1G010170/CsaV3_1G035920/CsaV3_2G001570/CsaV3_2G013320/CsaV3_2G030420/CsaV3_3G007170/CsaV3_3G007840/CsaV3_3G010470/CsaV3_3G021780/CsaV3_3G035920/CsaV3_4G037690/CsaV3_5G002770/CsaV3_5G029170/CsaV3_5G034810/CsaV3_5G036470/CsaV3_6G040330/CsaV3_6G040390/CsaV3_6G040430/CsaV3_6G048680/CsaV3_6G049050/CsaV3_7G022930	CsaV3_1G003090/CsaV3_1G005960/CsaV3_1G010170/CsaV3_1G035920/CsaV3_2G001570/CsaV3_2G013320/CsaV3_2G030420/CsaV3_3G007170/CsaV3_3G007840/CsaV3_3G010470/CsaV3_3G021780/CsaV3_3G035920/CsaV3_4G037690/CsaV3_5G002770/CsaV3_5G029170/CsaV3_5G034810/CsaV3_5G036470/CsaV3_6G040330/CsaV3_6G040390/CsaV3_6G040430/CsaV3_6G048680/CsaV3_6G049050/CsaV3_7G022930	23
BP	GO:1901605	alpha-amino acid metabolic process	20/2174	49/6278	0.220895	0.722725	CsaV3_1G000670/CsaV3_1G012640/CsaV3_1G037190/CsaV3_2G011840/CsaV3_2G033820/CsaV3_3G013840/CsaV3_3G021030/CsaV3_3G027930/CsaV3_3G040500/CsaV3_3G043020/CsaV3_4G024670/CsaV3_5G023920/CsaV3_5G029840/CsaV3_6G014760/CsaV3_6G016090/CsaV3_6G047800/CsaV3_7G008280/CsaV3_7G018620/CsaV3_7G021780/CsaV3_7G030560	CsaV3_1G000670/CsaV3_1G012640/CsaV3_1G037190/CsaV3_2G011840/CsaV3_2G033820/CsaV3_3G013840/CsaV3_3G021030/CsaV3_3G027930/CsaV3_3G040500/CsaV3_3G043020/CsaV3_4G024670/CsaV3_5G023920/CsaV3_5G029840/CsaV3_6G014760/CsaV3_6G016090/CsaV3_6G047800/CsaV3_7G008280/CsaV3_7G018620/CsaV3_7G021780/CsaV3_7G030560	20
BP	GO:0034622	cellular protein-containing complex assembly	17/2174	41/6278	0.222197	0.722725	CsaV3_1G005360/CsaV3_1G042700/CsaV3_1G043050/CsaV3_2G006740/CsaV3_3G003930/CsaV3_3G005970/CsaV3_4G000180/CsaV3_4G031280/CsaV3_5G028310/CsaV3_5G037970/CsaV3_6G004830/CsaV3_6G006410/CsaV3_6G036780/CsaV3_6G038790/CsaV3_6G044170/CsaV3_7G004070/CsaV3_7G004300	CsaV3_1G005360/CsaV3_1G042700/CsaV3_1G043050/CsaV3_2G006740/CsaV3_3G003930/CsaV3_3G005970/CsaV3_4G000180/CsaV3_4G031280/CsaV3_5G028310/CsaV3_5G037970/CsaV3_6G004830/CsaV3_6G006410/CsaV3_6G036780/CsaV3_6G038790/CsaV3_6G044170/CsaV3_7G004070/CsaV3_7G004300	17
BP	GO:0016579	protein deubiquitination	100322	20/6278	0.22636	0.722725	CsaV3_1G002070/CsaV3_1G017170/CsaV3_2G007460/CsaV3_2G031540/CsaV3_3G001680/CsaV3_3G047940/CsaV3_4G008890/CsaV3_4G036280/CsaV3_5G006240	CsaV3_1G002070/CsaV3_1G017170/CsaV3_2G007460/CsaV3_2G031540/CsaV3_3G001680/CsaV3_3G047940/CsaV3_4G008890/CsaV3_4G036280/CsaV3_5G006240	9
BP	GO:0070646	protein modification by small protein removal	100322	20/6278	0.22636	0.722725	CsaV3_1G002070/CsaV3_1G017170/CsaV3_2G007460/CsaV3_2G031540/CsaV3_3G001680/CsaV3_3G047940/CsaV3_4G008890/CsaV3_4G036280/CsaV3_5G006240	CsaV3_1G002070/CsaV3_1G017170/CsaV3_2G007460/CsaV3_2G031540/CsaV3_3G001680/CsaV3_3G047940/CsaV3_4G008890/CsaV3_4G036280/CsaV3_5G006240	9
BP	GO:0019439	aromatic compound catabolic process	21/2174	52/6278	0.230819	0.722725	CsaV3_1G003090/CsaV3_1G035920/CsaV3_1G041450/CsaV3_1G043980/CsaV3_2G013320/CsaV3_2G013440/CsaV3_2G030420/CsaV3_3G021780/CsaV3_3G035920/CsaV3_4G034140/CsaV3_4G037690/CsaV3_5G025230/CsaV3_5G029170/CsaV3_5G034420/CsaV3_6G014380/CsaV3_6G040330/CsaV3_6G040390/CsaV3_6G040430/CsaV3_6G048680/CsaV3_7G008280/CsaV3_7G022930	CsaV3_1G003090/CsaV3_1G035920/CsaV3_1G041450/CsaV3_1G043980/CsaV3_2G013320/CsaV3_2G013440/CsaV3_2G030420/CsaV3_3G021780/CsaV3_3G035920/CsaV3_4G034140/CsaV3_4G037690/CsaV3_5G025230/CsaV3_5G029170/CsaV3_5G034420/CsaV3_6G014380/CsaV3_6G040330/CsaV3_6G040390/CsaV3_6G040430/CsaV3_6G048680/CsaV3_7G008280/CsaV3_7G022930	21
BP	GO:0006855	drug transmembrane transport	18/2174	44/6278	0.233633	0.722725	CsaV3_1G001040/CsaV3_1G001050/CsaV3_1G004170/CsaV3_1G004180/CsaV3_1G011510/CsaV3_1G039850/CsaV3_2G015200/CsaV3_2G029970/CsaV3_2G030540/CsaV3_4G024250/CsaV3_4G033600/CsaV3_5G003620/CsaV3_5G031190/CsaV3_5G040020/CsaV3_7G001750/CsaV3_7G003640/CsaV3_7G003650/CsaV3_7G024260	CsaV3_1G001040/CsaV3_1G001050/CsaV3_1G004170/CsaV3_1G004180/CsaV3_1G011510/CsaV3_1G039850/CsaV3_2G015200/CsaV3_2G029970/CsaV3_2G030540/CsaV3_4G024250/CsaV3_4G033600/CsaV3_5G003620/CsaV3_5G031190/CsaV3_5G040020/CsaV3_7G001750/CsaV3_7G003640/CsaV3_7G003650/CsaV3_7G024260	18
BP	GO:0015893	drug transport	18/2174	44/6278	0.233633	0.722725	CsaV3_1G001040/CsaV3_1G001050/CsaV3_1G004170/CsaV3_1G004180/CsaV3_1G011510/CsaV3_1G039850/CsaV3_2G015200/CsaV3_2G029970/CsaV3_2G030540/CsaV3_4G024250/CsaV3_4G033600/CsaV3_5G003620/CsaV3_5G031190/CsaV3_5G040020/CsaV3_7G001750/CsaV3_7G003640/CsaV3_7G003650/CsaV3_7G024260	CsaV3_1G001040/CsaV3_1G001050/CsaV3_1G004170/CsaV3_1G004180/CsaV3_1G011510/CsaV3_1G039850/CsaV3_2G015200/CsaV3_2G029970/CsaV3_2G030540/CsaV3_4G024250/CsaV3_4G033600/CsaV3_5G003620/CsaV3_5G031190/CsaV3_5G040020/CsaV3_7G001750/CsaV3_7G003640/CsaV3_7G003650/CsaV3_7G024260	18
BP	GO:0042493	response to drug	18/2174	44/6278	0.233633	0.722725	CsaV3_1G001040/CsaV3_1G001050/CsaV3_1G004170/CsaV3_1G004180/CsaV3_1G011510/CsaV3_1G039850/CsaV3_2G015200/CsaV3_2G029970/CsaV3_2G030540/CsaV3_4G024250/CsaV3_4G033600/CsaV3_5G003620/CsaV3_5G031190/CsaV3_5G040020/CsaV3_7G001750/CsaV3_7G003640/CsaV3_7G003650/CsaV3_7G024260	CsaV3_1G001040/CsaV3_1G001050/CsaV3_1G004170/CsaV3_1G004180/CsaV3_1G011510/CsaV3_1G039850/CsaV3_2G015200/CsaV3_2G029970/CsaV3_2G030540/CsaV3_4G024250/CsaV3_4G033600/CsaV3_5G003620/CsaV3_5G031190/CsaV3_5G040020/CsaV3_7G001750/CsaV3_7G003640/CsaV3_7G003650/CsaV3_7G024260	18
BP	GO:0006418	tRNA aminoacylation for protein translation	15/2174	36/6278	0.23498	0.722725	CsaV3_1G003150/CsaV3_1G012830/CsaV3_1G038230/CsaV3_1G039630/CsaV3_2G008510/CsaV3_3G014640/CsaV3_3G031480/CsaV3_3G048470/CsaV3_4G003190/CsaV3_5G002780/CsaV3_5G013970/CsaV3_5G015730/CsaV3_5G026430/CsaV3_6G008710/CsaV3_6G048760	CsaV3_1G003150/CsaV3_1G012830/CsaV3_1G038230/CsaV3_1G039630/CsaV3_2G008510/CsaV3_3G014640/CsaV3_3G031480/CsaV3_3G048470/CsaV3_4G003190/CsaV3_5G002780/CsaV3_5G013970/CsaV3_5G015730/CsaV3_5G026430/CsaV3_6G008710/CsaV3_6G048760	15
BP	GO:0005991	trehalose metabolic process	100260	15/6278	0.235216	0.722725	CsaV3_1G001640/CsaV3_1G022900/CsaV3_3G016150/CsaV3_5G002020/CsaV3_5G031700/CsaV3_6G045560/CsaV3_6G051060	CsaV3_1G001640/CsaV3_1G022900/CsaV3_3G016150/CsaV3_5G002020/CsaV3_5G031700/CsaV3_6G045560/CsaV3_6G051060	7
BP	GO:0006605	protein targeting	100260	15/6278	0.235216	0.722725	CsaV3_1G036760/CsaV3_2G007560/CsaV3_2G013670/CsaV3_5G030580/CsaV3_6G004490/CsaV3_6G040720/CsaV3_7G001160	CsaV3_1G036760/CsaV3_2G007560/CsaV3_2G013670/CsaV3_5G030580/CsaV3_6G004490/CsaV3_6G040720/CsaV3_7G001160	7
BP	GO:0009064	glutamine family amino acid metabolic process	100260	15/6278	0.235216	0.722725	CsaV3_1G000670/CsaV3_2G033820/CsaV3_3G013840/CsaV3_3G021030/CsaV3_3G027930/CsaV3_5G023920/CsaV3_7G030560	CsaV3_1G000670/CsaV3_2G033820/CsaV3_3G013840/CsaV3_3G021030/CsaV3_3G027930/CsaV3_5G023920/CsaV3_7G030560	7
BP	GO:0006457	protein folding	25/2174	63/6278	0.235619	0.722725	CsaV3_1G007990/CsaV3_1G038690/CsaV3_1G038710/CsaV3_1G041320/CsaV3_1G044020/CsaV3_2G010590/CsaV3_2G015950/CsaV3_2G031860/CsaV3_3G004810/CsaV3_3G006070/CsaV3_3G010660/CsaV3_3G015840/CsaV3_3G016330/CsaV3_3G042370/CsaV3_4G008850/CsaV3_5G018650/CsaV3_5G018740/CsaV3_5G035180/CsaV3_5G036900/CsaV3_5G038350/CsaV3_6G006410/CsaV3_6G006710/CsaV3_6G007990/CsaV3_6G050390/CsaV3_7G030050	CsaV3_1G007990/CsaV3_1G038690/CsaV3_1G038710/CsaV3_1G041320/CsaV3_1G044020/CsaV3_2G010590/CsaV3_2G015950/CsaV3_2G031860/CsaV3_3G004810/CsaV3_3G006070/CsaV3_3G010660/CsaV3_3G015840/CsaV3_3G016330/CsaV3_3G042370/CsaV3_4G008850/CsaV3_5G018650/CsaV3_5G018740/CsaV3_5G035180/CsaV3_5G036900/CsaV3_5G038350/CsaV3_6G006410/CsaV3_6G006710/CsaV3_6G007990/CsaV3_6G050390/CsaV3_7G030050	25
BP	GO:0006753	nucleoside phosphate metabolic process	37/2174	96/6278	0.239132	0.722725	CsaV3_1G003090/CsaV3_1G005960/CsaV3_1G008930/CsaV3_1G010170/CsaV3_1G016970/CsaV3_1G035920/CsaV3_1G037750/CsaV3_1G041450/CsaV3_1G042920/CsaV3_2G001570/CsaV3_2G013320/CsaV3_2G028630/CsaV3_2G030420/CsaV3_3G007170/CsaV3_3G007840/CsaV3_3G010470/CsaV3_3G015600/CsaV3_3G021780/CsaV3_3G027630/CsaV3_3G035920/CsaV3_4G000980/CsaV3_4G006330/CsaV3_4G008710/CsaV3_4G037690/CsaV3_5G002770/CsaV3_5G028490/CsaV3_5G0…	CsaV3_1G003090/CsaV3_1G005960/CsaV3_1G008930/CsaV3_1G010170/CsaV3_1G016970/CsaV3_1G035920/CsaV3_1G037750/CsaV3_1G041450/CsaV3_1G042920/CsaV3_2G001570/CsaV3_2G013320/CsaV3_2G028630/CsaV3_2G030420/CsaV3_3G007170/CsaV3_3G007840/CsaV3_3G010470/CsaV3_3G015600/CsaV3_3G021780/CsaV3_3G027630/CsaV3_3G035920/CsaV3_4G000980/CsaV3_4G006330/CsaV3_4G008710/CsaV3_4G037690/CsaV3_5G002770/CsaV3_5G028490/CsaV3_5G0…	37
BP	GO:0006541	glutamine metabolic process	100199	1599307	0.240267	0.722725	CsaV3_2G033820/CsaV3_3G013840/CsaV3_3G021030/CsaV3_5G023920/CsaV3_7G030560	CsaV3_2G033820/CsaV3_3G013840/CsaV3_3G021030/CsaV3_5G023920/CsaV3_7G030560	5
BP	GO:0006612	protein targeting to membrane	100199	1599307	0.240267	0.722725	CsaV3_1G036760/CsaV3_2G007560/CsaV3_2G013670/CsaV3_5G030580/CsaV3_6G040720	CsaV3_1G036760/CsaV3_2G007560/CsaV3_2G013670/CsaV3_5G030580/CsaV3_6G040720	5
BP	GO:0006613	cotranslational protein targeting to membrane	100199	1599307	0.240267	0.722725	CsaV3_1G036760/CsaV3_2G007560/CsaV3_2G013670/CsaV3_5G030580/CsaV3_6G040720	CsaV3_1G036760/CsaV3_2G007560/CsaV3_2G013670/CsaV3_5G030580/CsaV3_6G040720	5
BP	GO:0006614	SRP-dependent cotranslational protein targeting to membrane	100199	1599307	0.240267	0.722725	CsaV3_1G036760/CsaV3_2G007560/CsaV3_2G013670/CsaV3_5G030580/CsaV3_6G040720	CsaV3_1G036760/CsaV3_2G007560/CsaV3_2G013670/CsaV3_5G030580/CsaV3_6G040720	5
BP	GO:0022411	cellular component disassembly	100199	1599307	0.240267	0.722725	CsaV3_1G028950/CsaV3_2G006740/CsaV3_5G029740/CsaV3_5G033100/CsaV3_6G004830	CsaV3_1G028950/CsaV3_2G006740/CsaV3_5G029740/CsaV3_5G033100/CsaV3_6G004830	5
BP	GO:0032984	protein-containing complex disassembly	100199	1599307	0.240267	0.722725	CsaV3_1G028950/CsaV3_2G006740/CsaV3_5G029740/CsaV3_5G033100/CsaV3_6G004830	CsaV3_1G028950/CsaV3_2G006740/CsaV3_5G029740/CsaV3_5G033100/CsaV3_6G004830	5
BP	GO:0043624	cellular protein complex disassembly	100199	1599307	0.240267	0.722725	CsaV3_1G028950/CsaV3_2G006740/CsaV3_5G029740/CsaV3_5G033100/CsaV3_6G004830	CsaV3_1G028950/CsaV3_2G006740/CsaV3_5G029740/CsaV3_5G033100/CsaV3_6G004830	5
BP	GO:0045047	protein targeting to ER	100199	1599307	0.240267	0.722725	CsaV3_1G036760/CsaV3_2G007560/CsaV3_2G013670/CsaV3_5G030580/CsaV3_6G040720	CsaV3_1G036760/CsaV3_2G007560/CsaV3_2G013670/CsaV3_5G030580/CsaV3_6G040720	5
BP	GO:0072599	establishment of protein localization to endoplasmic reticulum	100199	1599307	0.240267	0.722725	CsaV3_1G036760/CsaV3_2G007560/CsaV3_2G013670/CsaV3_5G030580/CsaV3_6G040720	CsaV3_1G036760/CsaV3_2G007560/CsaV3_2G013670/CsaV3_5G030580/CsaV3_6G040720	5
BP	GO:0006073	cellular glucan metabolic process	26/2174	66/6278	0.243709	0.722725	CsaV3_1G003390/CsaV3_1G031420/CsaV3_1G031430/CsaV3_1G031460/CsaV3_1G031470/CsaV3_1G042280/CsaV3_1G042290/CsaV3_2G018300/CsaV3_2G034720/CsaV3_2G036170/CsaV3_3G036070/CsaV3_3G046510/CsaV3_3G048830/CsaV3_4G001040/CsaV3_4G006800/CsaV3_4G011810/CsaV3_5G015380/CsaV3_5G027790/CsaV3_6G002560/CsaV3_6G014280/CsaV3_6G033720/CsaV3_7G003920/CsaV3_7G011470/CsaV3_7G011490/CsaV3_7G031050/CsaV3_7G031450	CsaV3_1G003390/CsaV3_1G031420/CsaV3_1G031430/CsaV3_1G031460/CsaV3_1G031470/CsaV3_1G042280/CsaV3_1G042290/CsaV3_2G018300/CsaV3_2G034720/CsaV3_2G036170/CsaV3_3G036070/CsaV3_3G046510/CsaV3_3G048830/CsaV3_4G001040/CsaV3_4G006800/CsaV3_4G011810/CsaV3_5G015380/CsaV3_5G027790/CsaV3_6G002560/CsaV3_6G014280/CsaV3_6G033720/CsaV3_7G003920/CsaV3_7G011470/CsaV3_7G011490/CsaV3_7G031050/CsaV3_7G031450	26
BP	GO:0044042	glucan metabolic process	26/2174	66/6278	0.243709	0.722725	CsaV3_1G003390/CsaV3_1G031420/CsaV3_1G031430/CsaV3_1G031460/CsaV3_1G031470/CsaV3_1G042280/CsaV3_1G042290/CsaV3_2G018300/CsaV3_2G034720/CsaV3_2G036170/CsaV3_3G036070/CsaV3_3G046510/CsaV3_3G048830/CsaV3_4G001040/CsaV3_4G006800/CsaV3_4G011810/CsaV3_5G015380/CsaV3_5G027790/CsaV3_6G002560/CsaV3_6G014280/CsaV3_6G033720/CsaV3_7G003920/CsaV3_7G011470/CsaV3_7G011490/CsaV3_7G031050/CsaV3_7G031450	CsaV3_1G003390/CsaV3_1G031420/CsaV3_1G031430/CsaV3_1G031460/CsaV3_1G031470/CsaV3_1G042280/CsaV3_1G042290/CsaV3_2G018300/CsaV3_2G034720/CsaV3_2G036170/CsaV3_3G036070/CsaV3_3G046510/CsaV3_3G048830/CsaV3_4G001040/CsaV3_4G006800/CsaV3_4G011810/CsaV3_5G015380/CsaV3_5G027790/CsaV3_6G002560/CsaV3_6G014280/CsaV3_6G033720/CsaV3_7G003920/CsaV3_7G011470/CsaV3_7G011490/CsaV3_7G031050/CsaV3_7G031450	26
BP	GO:0044264	cellular polysaccharide metabolic process	26/2174	66/6278	0.243709	0.722725	CsaV3_1G003390/CsaV3_1G031420/CsaV3_1G031430/CsaV3_1G031460/CsaV3_1G031470/CsaV3_1G042280/CsaV3_1G042290/CsaV3_2G018300/CsaV3_2G034720/CsaV3_2G036170/CsaV3_3G036070/CsaV3_3G046510/CsaV3_3G048830/CsaV3_4G001040/CsaV3_4G006800/CsaV3_4G011810/CsaV3_5G015380/CsaV3_5G027790/CsaV3_6G002560/CsaV3_6G014280/CsaV3_6G033720/CsaV3_7G003920/CsaV3_7G011470/CsaV3_7G011490/CsaV3_7G031050/CsaV3_7G031450	CsaV3_1G003390/CsaV3_1G031420/CsaV3_1G031430/CsaV3_1G031460/CsaV3_1G031470/CsaV3_1G042280/CsaV3_1G042290/CsaV3_2G018300/CsaV3_2G034720/CsaV3_2G036170/CsaV3_3G036070/CsaV3_3G046510/CsaV3_3G048830/CsaV3_4G001040/CsaV3_4G006800/CsaV3_4G011810/CsaV3_5G015380/CsaV3_5G027790/CsaV3_6G002560/CsaV3_6G014280/CsaV3_6G033720/CsaV3_7G003920/CsaV3_7G011470/CsaV3_7G011490/CsaV3_7G031050/CsaV3_7G031450	26
BP	GO:0000413	protein peptidyl-prolyl isomerization	100352	23/6278	0.246577	0.722725	CsaV3_2G010590/CsaV3_2G015950/CsaV3_2G031860/CsaV3_3G006070/CsaV3_3G010660/CsaV3_3G042370/CsaV3_5G018650/CsaV3_5G036900/CsaV3_6G007990/CsaV3_7G030050	CsaV3_2G010590/CsaV3_2G015950/CsaV3_2G031860/CsaV3_3G006070/CsaV3_3G010660/CsaV3_3G042370/CsaV3_5G018650/CsaV3_5G036900/CsaV3_6G007990/CsaV3_7G030050	10
BP	GO:0018208	peptidyl-proline modification	100352	23/6278	0.246577	0.722725	CsaV3_2G010590/CsaV3_2G015950/CsaV3_2G031860/CsaV3_3G006070/CsaV3_3G010660/CsaV3_3G042370/CsaV3_5G018650/CsaV3_5G036900/CsaV3_6G007990/CsaV3_7G030050	CsaV3_2G010590/CsaV3_2G015950/CsaV3_2G031860/CsaV3_3G006070/CsaV3_3G010660/CsaV3_3G042370/CsaV3_5G018650/CsaV3_5G036900/CsaV3_6G007990/CsaV3_7G030050	10
BP	GO:0007049	cell cycle	13/2174	31/6278	0.248943	0.724663	CsaV3_2G003690/CsaV3_2G005220/CsaV3_2G006500/CsaV3_2G009520/CsaV3_2G034670/CsaV3_4G010070/CsaV3_5G025150/CsaV3_5G033110/CsaV3_5G036930/CsaV3_6G015340/CsaV3_7G008680/CsaV3_7G021840/CsaV3_7G028110	CsaV3_2G003690/CsaV3_2G005220/CsaV3_2G006500/CsaV3_2G009520/CsaV3_2G034670/CsaV3_4G010070/CsaV3_5G025150/CsaV3_5G033110/CsaV3_5G036930/CsaV3_6G015340/CsaV3_7G008680/CsaV3_7G021840/CsaV3_7G028110	13
BP	GO:0046700	heterocycle catabolic process	20/2174	50/6278	0.254503	0.73039	CsaV3_1G003090/CsaV3_1G035920/CsaV3_1G041450/CsaV3_2G013320/CsaV3_2G013440/CsaV3_2G030420/CsaV3_3G021780/CsaV3_3G035920/CsaV3_4G034140/CsaV3_4G037690/CsaV3_5G025230/CsaV3_5G029170/CsaV3_5G034420/CsaV3_6G014380/CsaV3_6G040330/CsaV3_6G040390/CsaV3_6G040430/CsaV3_6G048680/CsaV3_7G008280/CsaV3_7G022930	CsaV3_1G003090/CsaV3_1G035920/CsaV3_1G041450/CsaV3_2G013320/CsaV3_2G013440/CsaV3_2G030420/CsaV3_3G021780/CsaV3_3G035920/CsaV3_4G034140/CsaV3_4G037690/CsaV3_5G025230/CsaV3_5G029170/CsaV3_5G034420/CsaV3_6G014380/CsaV3_6G040330/CsaV3_6G040390/CsaV3_6G040430/CsaV3_6G048680/CsaV3_7G008280/CsaV3_7G022930	20
BP	GO:0019637	organophosphate metabolic process	58/2174	155/6278	0.255108	0.73039	CsaV3_1G003090/CsaV3_1G005960/CsaV3_1G008930/CsaV3_1G010170/CsaV3_1G016970/CsaV3_1G035920/CsaV3_1G037750/CsaV3_1G041450/CsaV3_1G042920/CsaV3_2G001570/CsaV3_2G013320/CsaV3_2G028630/CsaV3_2G030420/CsaV3_2G036580/CsaV3_3G001540/CsaV3_3G007170/CsaV3_3G007840/CsaV3_3G008320/CsaV3_3G010470/CsaV3_3G015600/CsaV3_3G021780/CsaV3_3G027630/CsaV3_3G035920/CsaV3_3G036240/CsaV3_3G048980/CsaV3_4G000980/CsaV3_4G0…	CsaV3_1G003090/CsaV3_1G005960/CsaV3_1G008930/CsaV3_1G010170/CsaV3_1G016970/CsaV3_1G035920/CsaV3_1G037750/CsaV3_1G041450/CsaV3_1G042920/CsaV3_2G001570/CsaV3_2G013320/CsaV3_2G028630/CsaV3_2G030420/CsaV3_2G036580/CsaV3_3G001540/CsaV3_3G007170/CsaV3_3G007840/CsaV3_3G008320/CsaV3_3G010470/CsaV3_3G015600/CsaV3_3G021780/CsaV3_3G027630/CsaV3_3G035920/CsaV3_3G036240/CsaV3_3G048980/CsaV3_4G000980/CsaV3_4G0…	58
BP	GO:0016043	cellular component organization	68/2174	183/6278	0.256123	0.73039	CsaV3_1G003410/CsaV3_1G004130/CsaV3_1G005360/CsaV3_1G008530/CsaV3_1G009070/CsaV3_1G010840/CsaV3_1G028940/CsaV3_1G028950/CsaV3_1G034030/CsaV3_1G038620/CsaV3_1G042700/CsaV3_1G043050/CsaV3_2G006740/CsaV3_2G008550/CsaV3_2G008570/CsaV3_2G018180/CsaV3_2G018190/CsaV3_2G034670/CsaV3_3G003930/CsaV3_3G005970/CsaV3_3G009270/CsaV3_3G011580/CsaV3_3G016100/CsaV3_3G019940/CsaV3_3G027790/CsaV3_3G032050/CsaV3_3G0…	CsaV3_1G003410/CsaV3_1G004130/CsaV3_1G005360/CsaV3_1G008530/CsaV3_1G009070/CsaV3_1G010840/CsaV3_1G028940/CsaV3_1G028950/CsaV3_1G034030/CsaV3_1G038620/CsaV3_1G042700/CsaV3_1G043050/CsaV3_2G006740/CsaV3_2G008550/CsaV3_2G008570/CsaV3_2G018180/CsaV3_2G018190/CsaV3_2G034670/CsaV3_3G003930/CsaV3_3G005970/CsaV3_3G009270/CsaV3_3G011580/CsaV3_3G016100/CsaV3_3G019940/CsaV3_3G027790/CsaV3_3G032050/CsaV3_3G0…	68
BP	GO:0034637	cellular carbohydrate biosynthetic process	24/2174	61/6278	0.257785	0.73039	CsaV3_1G001640/CsaV3_1G003390/CsaV3_1G022900/CsaV3_1G042280/CsaV3_1G042290/CsaV3_2G018300/CsaV3_2G034720/CsaV3_2G036170/CsaV3_3G016150/CsaV3_3G038290/CsaV3_3G046510/CsaV3_4G001040/CsaV3_4G006800/CsaV3_4G011810/CsaV3_5G031700/CsaV3_6G002560/CsaV3_6G033720/CsaV3_6G045560/CsaV3_6G051060/CsaV3_7G011470/CsaV3_7G011490/CsaV3_7G031050/CsaV3_7G031450/CsaV3_UNG190490	CsaV3_1G001640/CsaV3_1G003390/CsaV3_1G022900/CsaV3_1G042280/CsaV3_1G042290/CsaV3_2G018300/CsaV3_2G034720/CsaV3_2G036170/CsaV3_3G016150/CsaV3_3G038290/CsaV3_3G046510/CsaV3_4G001040/CsaV3_4G006800/CsaV3_4G011810/CsaV3_5G031700/CsaV3_6G002560/CsaV3_6G033720/CsaV3_6G045560/CsaV3_6G051060/CsaV3_7G011470/CsaV3_7G011490/CsaV3_7G031050/CsaV3_7G031450/CsaV3_UNG190490	24
BP	GO:0051276	chromosome organization	18/2174	45/6278	0.270162	0.76039	CsaV3_1G005360/CsaV3_2G034670/CsaV3_3G011580/CsaV3_3G016100/CsaV3_3G027790/CsaV3_3G032050/CsaV3_3G040650/CsaV3_3G047220/CsaV3_4G000180/CsaV3_4G034020/CsaV3_5G027630/CsaV3_5G028310/CsaV3_5G028660/CsaV3_5G037970/CsaV3_6G007420/CsaV3_6G035790/CsaV3_6G036780/CsaV3_6G044170	CsaV3_1G005360/CsaV3_2G034670/CsaV3_3G011580/CsaV3_3G016100/CsaV3_3G027790/CsaV3_3G032050/CsaV3_3G040650/CsaV3_3G047220/CsaV3_4G000180/CsaV3_4G034020/CsaV3_5G027630/CsaV3_5G028310/CsaV3_5G028660/CsaV3_5G037970/CsaV3_6G007420/CsaV3_6G035790/CsaV3_6G036780/CsaV3_6G044170	18
BP	GO:0065004	protein-DNA complex assembly	100230	13/6278	0.274158	0.760929	CsaV3_1G005360/CsaV3_4G000180/CsaV3_5G028310/CsaV3_5G037970/CsaV3_6G036780/CsaV3_6G044170	CsaV3_1G005360/CsaV3_4G000180/CsaV3_5G028310/CsaV3_5G037970/CsaV3_6G036780/CsaV3_6G044170	6
BP	GO:0071824	protein-DNA complex subunit organization	100230	13/6278	0.274158	0.760929	CsaV3_1G005360/CsaV3_4G000180/CsaV3_5G028310/CsaV3_5G037970/CsaV3_6G036780/CsaV3_6G044170	CsaV3_1G005360/CsaV3_4G000180/CsaV3_5G028310/CsaV3_5G037970/CsaV3_6G036780/CsaV3_6G044170	6
BP	GO:0072525	pyridine-containing compound biosynthetic process	15/2174	37/6278	0.275725	0.760929	CsaV3_1G003090/CsaV3_1G008930/CsaV3_1G035920/CsaV3_1G042920/CsaV3_2G013320/CsaV3_2G030420/CsaV3_3G021780/CsaV3_3G035920/CsaV3_4G037690/CsaV3_5G029170/CsaV3_6G040330/CsaV3_6G040390/CsaV3_6G040430/CsaV3_6G048680/CsaV3_7G022930	CsaV3_1G003090/CsaV3_1G008930/CsaV3_1G035920/CsaV3_1G042920/CsaV3_2G013320/CsaV3_2G030420/CsaV3_3G021780/CsaV3_3G035920/CsaV3_4G037690/CsaV3_5G029170/CsaV3_6G040330/CsaV3_6G040390/CsaV3_6G040430/CsaV3_6G048680/CsaV3_7G022930	15
BP	GO:0009117	nucleotide metabolic process	36/2174	95/6278	0.28347	0.777258	CsaV3_1G003090/CsaV3_1G005960/CsaV3_1G008930/CsaV3_1G010170/CsaV3_1G016970/CsaV3_1G035920/CsaV3_1G037750/CsaV3_1G041450/CsaV3_1G042920/CsaV3_2G001570/CsaV3_2G013320/CsaV3_2G028630/CsaV3_2G030420/CsaV3_3G007170/CsaV3_3G007840/CsaV3_3G010470/CsaV3_3G015600/CsaV3_3G021780/CsaV3_3G035920/CsaV3_4G000980/CsaV3_4G006330/CsaV3_4G008710/CsaV3_4G037690/CsaV3_5G002770/CsaV3_5G028490/CsaV3_5G029170/CsaV3_5G0…	CsaV3_1G003090/CsaV3_1G005960/CsaV3_1G008930/CsaV3_1G010170/CsaV3_1G016970/CsaV3_1G035920/CsaV3_1G037750/CsaV3_1G041450/CsaV3_1G042920/CsaV3_2G001570/CsaV3_2G013320/CsaV3_2G028630/CsaV3_2G030420/CsaV3_3G007170/CsaV3_3G007840/CsaV3_3G010470/CsaV3_3G015600/CsaV3_3G021780/CsaV3_3G035920/CsaV3_4G000980/CsaV3_4G006330/CsaV3_4G008710/CsaV3_4G037690/CsaV3_5G002770/CsaV3_5G028490/CsaV3_5G029170/CsaV3_5G0…	36
BP	GO:1901361	organic cyclic compound catabolic process	20/2174	51/6278	0.289963	0.789962	CsaV3_1G003090/CsaV3_1G035920/CsaV3_1G041450/CsaV3_2G013320/CsaV3_2G013440/CsaV3_2G030420/CsaV3_3G021780/CsaV3_3G035920/CsaV3_4G034140/CsaV3_4G037690/CsaV3_5G025230/CsaV3_5G029170/CsaV3_5G034420/CsaV3_6G014380/CsaV3_6G040330/CsaV3_6G040390/CsaV3_6G040430/CsaV3_6G048680/CsaV3_7G008280/CsaV3_7G022930	CsaV3_1G003090/CsaV3_1G035920/CsaV3_1G041450/CsaV3_2G013320/CsaV3_2G013440/CsaV3_2G030420/CsaV3_3G021780/CsaV3_3G035920/CsaV3_4G034140/CsaV3_4G037690/CsaV3_5G025230/CsaV3_5G029170/CsaV3_5G034420/CsaV3_6G014380/CsaV3_6G040330/CsaV3_6G040390/CsaV3_6G040430/CsaV3_6G048680/CsaV3_7G008280/CsaV3_7G022930	20
BP	GO:0043933	protein-containing complex subunit organization	21/2174	54/6278	0.299002	0.808078	CsaV3_1G005360/CsaV3_1G028940/CsaV3_1G028950/CsaV3_1G042700/CsaV3_1G043050/CsaV3_2G006740/CsaV3_3G003930/CsaV3_3G005970/CsaV3_4G000180/CsaV3_4G031280/CsaV3_5G028310/CsaV3_5G029740/CsaV3_5G033100/CsaV3_5G037970/CsaV3_6G004830/CsaV3_6G006410/CsaV3_6G036780/CsaV3_6G038790/CsaV3_6G044170/CsaV3_7G004070/CsaV3_7G004300	CsaV3_1G005360/CsaV3_1G028940/CsaV3_1G028950/CsaV3_1G042700/CsaV3_1G043050/CsaV3_2G006740/CsaV3_3G003930/CsaV3_3G005970/CsaV3_4G000180/CsaV3_4G031280/CsaV3_5G028310/CsaV3_5G029740/CsaV3_5G033100/CsaV3_5G037970/CsaV3_6G004830/CsaV3_6G006410/CsaV3_6G036780/CsaV3_6G038790/CsaV3_6G044170/CsaV3_7G004070/CsaV3_7G004300	21
BP	GO:0046351	disaccharide biosynthetic process	100260	16/6278	0.300415	0.808078	CsaV3_1G001640/CsaV3_1G022900/CsaV3_3G016150/CsaV3_3G038290/CsaV3_5G031700/CsaV3_6G045560/CsaV3_6G051060	CsaV3_1G001640/CsaV3_1G022900/CsaV3_3G016150/CsaV3_3G038290/CsaV3_5G031700/CsaV3_6G045560/CsaV3_6G051060	7
BP	GO:0065003	protein-containing complex assembly	18/2174	46/6278	0.308562	0.824774	CsaV3_1G005360/CsaV3_1G028940/CsaV3_1G042700/CsaV3_1G043050/CsaV3_2G006740/CsaV3_3G003930/CsaV3_3G005970/CsaV3_4G000180/CsaV3_4G031280/CsaV3_5G028310/CsaV3_5G037970/CsaV3_6G004830/CsaV3_6G006410/CsaV3_6G036780/CsaV3_6G038790/CsaV3_6G044170/CsaV3_7G004070/CsaV3_7G004300	CsaV3_1G005360/CsaV3_1G028940/CsaV3_1G042700/CsaV3_1G043050/CsaV3_2G006740/CsaV3_3G003930/CsaV3_3G005970/CsaV3_4G000180/CsaV3_4G031280/CsaV3_5G028310/CsaV3_5G037970/CsaV3_6G004830/CsaV3_6G006410/CsaV3_6G036780/CsaV3_6G038790/CsaV3_6G044170/CsaV3_7G004070/CsaV3_7G004300	18
BP	GO:0005976	polysaccharide metabolic process	28/2174	74/6278	0.31915	0.82524	CsaV3_1G003390/CsaV3_1G031420/CsaV3_1G031430/CsaV3_1G031460/CsaV3_1G031470/CsaV3_1G042280/CsaV3_1G042290/CsaV3_2G018300/CsaV3_2G034720/CsaV3_2G036170/CsaV3_3G002150/CsaV3_3G011520/CsaV3_3G036070/CsaV3_3G046510/CsaV3_3G048830/CsaV3_4G001040/CsaV3_4G006800/CsaV3_4G011810/CsaV3_5G015380/CsaV3_5G027790/CsaV3_6G002560/CsaV3_6G014280/CsaV3_6G033720/CsaV3_7G003920/CsaV3_7G011470/CsaV3_7G011490/CsaV3_7G0…	CsaV3_1G003390/CsaV3_1G031420/CsaV3_1G031430/CsaV3_1G031460/CsaV3_1G031470/CsaV3_1G042280/CsaV3_1G042290/CsaV3_2G018300/CsaV3_2G034720/CsaV3_2G036170/CsaV3_3G002150/CsaV3_3G011520/CsaV3_3G036070/CsaV3_3G046510/CsaV3_3G048830/CsaV3_4G001040/CsaV3_4G006800/CsaV3_4G011810/CsaV3_5G015380/CsaV3_5G027790/CsaV3_6G002560/CsaV3_6G014280/CsaV3_6G033720/CsaV3_7G003920/CsaV3_7G011470/CsaV3_7G011490/CsaV3_7G0…	28
BP	GO:0009312	oligosaccharide biosynthetic process	100291	19/6278	0.321667	0.82524	CsaV3_1G001640/CsaV3_1G022900/CsaV3_3G016150/CsaV3_3G038290/CsaV3_5G031700/CsaV3_6G045560/CsaV3_6G051060/CsaV3_7G002510	CsaV3_1G001640/CsaV3_1G022900/CsaV3_3G016150/CsaV3_3G038290/CsaV3_5G031700/CsaV3_6G045560/CsaV3_6G051060/CsaV3_7G002510	8
BP	GO:0006298	mismatch repair	100199	1599338	0.321915	0.82524	CsaV3_1G003630/CsaV3_2G002320/CsaV3_3G000200/CsaV3_7G029150/CsaV3_7G029930	CsaV3_1G003630/CsaV3_2G002320/CsaV3_3G000200/CsaV3_7G029150/CsaV3_7G029930	5
BP	GO:0006414	translational elongation	100199	1599338	0.321915	0.82524	CsaV3_1G021840/CsaV3_1G028950/CsaV3_3G033100/CsaV3_5G033100/CsaV3_6G002420	CsaV3_1G021840/CsaV3_1G028950/CsaV3_3G033100/CsaV3_5G033100/CsaV3_6G002420	5
BP	GO:0046907	intracellular transport	34/2174	91/6278	0.326441	0.82524	CsaV3_1G006710/CsaV3_1G014870/CsaV3_1G023100/CsaV3_1G036760/CsaV3_2G007560/CsaV3_2G012420/CsaV3_2G013670/CsaV3_2G014650/CsaV3_2G015150/CsaV3_2G031010/CsaV3_3G033250/CsaV3_3G041240/CsaV3_3G047380/CsaV3_3G048660/CsaV3_4G026140/CsaV3_5G000990/CsaV3_5G003280/CsaV3_5G030580/CsaV3_5G033760/CsaV3_5G038260/CsaV3_6G001890/CsaV3_6G004490/CsaV3_6G006390/CsaV3_6G014610/CsaV3_6G040720/CsaV3_6G048860/CsaV3_6G0…	CsaV3_1G006710/CsaV3_1G014870/CsaV3_1G023100/CsaV3_1G036760/CsaV3_2G007560/CsaV3_2G012420/CsaV3_2G013670/CsaV3_2G014650/CsaV3_2G015150/CsaV3_2G031010/CsaV3_3G033250/CsaV3_3G041240/CsaV3_3G047380/CsaV3_3G048660/CsaV3_4G026140/CsaV3_5G000990/CsaV3_5G003280/CsaV3_5G030580/CsaV3_5G033760/CsaV3_5G038260/CsaV3_6G001890/CsaV3_6G004490/CsaV3_6G006390/CsaV3_6G014610/CsaV3_6G040720/CsaV3_6G048860/CsaV3_6G0…	34
BP	GO:0051649	establishment of localization in cell	34/2174	91/6278	0.326441	0.82524	CsaV3_1G006710/CsaV3_1G014870/CsaV3_1G023100/CsaV3_1G036760/CsaV3_2G007560/CsaV3_2G012420/CsaV3_2G013670/CsaV3_2G014650/CsaV3_2G015150/CsaV3_2G031010/CsaV3_3G033250/CsaV3_3G041240/CsaV3_3G047380/CsaV3_3G048660/CsaV3_4G026140/CsaV3_5G000990/CsaV3_5G003280/CsaV3_5G030580/CsaV3_5G033760/CsaV3_5G038260/CsaV3_6G001890/CsaV3_6G004490/CsaV3_6G006390/CsaV3_6G014610/CsaV3_6G040720/CsaV3_6G048860/CsaV3_6G0…	CsaV3_1G006710/CsaV3_1G014870/CsaV3_1G023100/CsaV3_1G036760/CsaV3_2G007560/CsaV3_2G012420/CsaV3_2G013670/CsaV3_2G014650/CsaV3_2G015150/CsaV3_2G031010/CsaV3_3G033250/CsaV3_3G041240/CsaV3_3G047380/CsaV3_3G048660/CsaV3_4G026140/CsaV3_5G000990/CsaV3_5G003280/CsaV3_5G030580/CsaV3_5G033760/CsaV3_5G038260/CsaV3_6G001890/CsaV3_6G004490/CsaV3_6G006390/CsaV3_6G014610/CsaV3_6G040720/CsaV3_6G048860/CsaV3_6G0…	34
BP	GO:0006887	exocytosis	100413	30/6278	0.329012	0.82524	CsaV3_1G005990/CsaV3_1G009630/CsaV3_1G033630/CsaV3_3G030800/CsaV3_5G036050/CsaV3_6G004750/CsaV3_6G006180/CsaV3_6G022100/CsaV3_6G030940/CsaV3_6G036710/CsaV3_7G001760/CsaV3_7G029390	CsaV3_1G005990/CsaV3_1G009630/CsaV3_1G033630/CsaV3_3G030800/CsaV3_5G036050/CsaV3_6G004750/CsaV3_6G006180/CsaV3_6G022100/CsaV3_6G030940/CsaV3_6G036710/CsaV3_7G001760/CsaV3_7G029390	12
BP	GO:0032940	secretion by cell	100413	30/6278	0.329012	0.82524	CsaV3_1G005990/CsaV3_1G009630/CsaV3_1G033630/CsaV3_3G030800/CsaV3_5G036050/CsaV3_6G004750/CsaV3_6G006180/CsaV3_6G022100/CsaV3_6G030940/CsaV3_6G036710/CsaV3_7G001760/CsaV3_7G029390	CsaV3_1G005990/CsaV3_1G009630/CsaV3_1G033630/CsaV3_3G030800/CsaV3_5G036050/CsaV3_6G004750/CsaV3_6G006180/CsaV3_6G022100/CsaV3_6G030940/CsaV3_6G036710/CsaV3_7G001760/CsaV3_7G029390	12
BP	GO:0046903	secretion	100413	30/6278	0.329012	0.82524	CsaV3_1G005990/CsaV3_1G009630/CsaV3_1G033630/CsaV3_3G030800/CsaV3_5G036050/CsaV3_6G004750/CsaV3_6G006180/CsaV3_6G022100/CsaV3_6G030940/CsaV3_6G036710/CsaV3_7G001760/CsaV3_7G029390	CsaV3_1G005990/CsaV3_1G009630/CsaV3_1G033630/CsaV3_3G030800/CsaV3_5G036050/CsaV3_6G004750/CsaV3_6G006180/CsaV3_6G022100/CsaV3_6G030940/CsaV3_6G036710/CsaV3_7G001760/CsaV3_7G029390	12
BP	GO:0071840	cellular component organization or biogenesis	79/2174	218/6278	0.329442	0.82524	CsaV3_1G000640/CsaV3_1G003410/CsaV3_1G004130/CsaV3_1G005360/CsaV3_1G008530/CsaV3_1G009070/CsaV3_1G010840/CsaV3_1G028940/CsaV3_1G028950/CsaV3_1G034030/CsaV3_1G038620/CsaV3_1G042700/CsaV3_1G043050/CsaV3_2G006740/CsaV3_2G008550/CsaV3_2G008570/CsaV3_2G014840/CsaV3_2G015360/CsaV3_2G018180/CsaV3_2G018190/CsaV3_2G034670/CsaV3_3G003930/CsaV3_3G005970/CsaV3_3G009270/CsaV3_3G011580/CsaV3_3G016100/CsaV3_3G0…	CsaV3_1G000640/CsaV3_1G003410/CsaV3_1G004130/CsaV3_1G005360/CsaV3_1G008530/CsaV3_1G009070/CsaV3_1G010840/CsaV3_1G028940/CsaV3_1G028950/CsaV3_1G034030/CsaV3_1G038620/CsaV3_1G042700/CsaV3_1G043050/CsaV3_2G006740/CsaV3_2G008550/CsaV3_2G008570/CsaV3_2G014840/CsaV3_2G015360/CsaV3_2G018180/CsaV3_2G018190/CsaV3_2G034670/CsaV3_3G003930/CsaV3_3G005970/CsaV3_3G009270/CsaV3_3G011580/CsaV3_3G016100/CsaV3_3G0…	79
BP	GO:0006886	intracellular protein transport	30/2174	80/6278	0.332028	0.82524	CsaV3_1G006710/CsaV3_1G014870/CsaV3_1G023100/CsaV3_1G036760/CsaV3_2G007560/CsaV3_2G012420/CsaV3_2G013670/CsaV3_2G014650/CsaV3_2G015150/CsaV3_2G031010/CsaV3_3G033250/CsaV3_3G041240/CsaV3_3G047380/CsaV3_3G048660/CsaV3_4G026140/CsaV3_5G030580/CsaV3_5G033760/CsaV3_5G038260/CsaV3_6G001890/CsaV3_6G004490/CsaV3_6G006390/CsaV3_6G014610/CsaV3_6G040720/CsaV3_6G048860/CsaV3_6G050000/CsaV3_7G001160/CsaV3_7G0…	CsaV3_1G006710/CsaV3_1G014870/CsaV3_1G023100/CsaV3_1G036760/CsaV3_2G007560/CsaV3_2G012420/CsaV3_2G013670/CsaV3_2G014650/CsaV3_2G015150/CsaV3_2G031010/CsaV3_3G033250/CsaV3_3G041240/CsaV3_3G047380/CsaV3_3G048660/CsaV3_4G026140/CsaV3_5G030580/CsaV3_5G033760/CsaV3_5G038260/CsaV3_6G001890/CsaV3_6G004490/CsaV3_6G006390/CsaV3_6G014610/CsaV3_6G040720/CsaV3_6G048860/CsaV3_6G050000/CsaV3_7G001160/CsaV3_7G0…	30
BP	GO:0008610	lipid biosynthetic process	35/2174	94/6278	0.332038	0.82524	CsaV3_1G029290/CsaV3_1G030920/CsaV3_2G001370/CsaV3_2G028690/CsaV3_3G003250/CsaV3_3G003490/CsaV3_3G006740/CsaV3_3G006930/CsaV3_3G008180/CsaV3_3G008190/CsaV3_3G010300/CsaV3_3G015980/CsaV3_3G016490/CsaV3_3G017450/CsaV3_3G032020/CsaV3_4G022060/CsaV3_4G022080/CsaV3_4G028790/CsaV3_4G037630/CsaV3_5G002520/CsaV3_5G003990/CsaV3_5G023610/CsaV3_5G028680/CsaV3_5G033710/CsaV3_6G002810/CsaV3_6G005620/CsaV3_6G0…	CsaV3_1G029290/CsaV3_1G030920/CsaV3_2G001370/CsaV3_2G028690/CsaV3_3G003250/CsaV3_3G003490/CsaV3_3G006740/CsaV3_3G006930/CsaV3_3G008180/CsaV3_3G008190/CsaV3_3G010300/CsaV3_3G015980/CsaV3_3G016490/CsaV3_3G017450/CsaV3_3G032020/CsaV3_4G022060/CsaV3_4G022080/CsaV3_4G028790/CsaV3_4G037630/CsaV3_5G002520/CsaV3_5G003990/CsaV3_5G023610/CsaV3_5G028680/CsaV3_5G033710/CsaV3_6G002810/CsaV3_6G005620/CsaV3_6G0…	35
BP	GO:0006352	DNA-templated transcription, initiation	100322	22/6278	0.339421	0.825949	CsaV3_1G041520/CsaV3_2G033370/CsaV3_2G035830/CsaV3_3G028740/CsaV3_3G031970/CsaV3_4G006050/CsaV3_6G039830/CsaV3_6G040610/CsaV3_7G003000	CsaV3_1G041520/CsaV3_2G033370/CsaV3_2G035830/CsaV3_3G028740/CsaV3_3G031970/CsaV3_4G006050/CsaV3_6G039830/CsaV3_6G040610/CsaV3_7G003000	9
BP	GO:0009141	nucleoside triphosphate metabolic process	22/2174	58/6278	0.343186	0.825949	CsaV3_1G003090/CsaV3_1G005960/CsaV3_1G035920/CsaV3_2G001570/CsaV3_2G013320/CsaV3_2G028630/CsaV3_2G030420/CsaV3_3G007170/CsaV3_3G007840/CsaV3_3G010470/CsaV3_3G021780/CsaV3_3G035920/CsaV3_4G037690/CsaV3_5G029170/CsaV3_5G034810/CsaV3_5G036470/CsaV3_6G040330/CsaV3_6G040390/CsaV3_6G040430/CsaV3_6G048680/CsaV3_6G049050/CsaV3_7G022930	CsaV3_1G003090/CsaV3_1G005960/CsaV3_1G035920/CsaV3_2G001570/CsaV3_2G013320/CsaV3_2G028630/CsaV3_2G030420/CsaV3_3G007170/CsaV3_3G007840/CsaV3_3G010470/CsaV3_3G021780/CsaV3_3G035920/CsaV3_4G037690/CsaV3_5G029170/CsaV3_5G034810/CsaV3_5G036470/CsaV3_6G040330/CsaV3_6G040390/CsaV3_6G040430/CsaV3_6G048680/CsaV3_6G049050/CsaV3_7G022930	22
BP	GO:0003333	amino acid transmembrane transport	100230	14/6278	0.348226	0.825949	CsaV3_4G007780/CsaV3_4G011960/CsaV3_5G034670/CsaV3_6G004330/CsaV3_6G036380/CsaV3_7G007920	CsaV3_4G007780/CsaV3_4G011960/CsaV3_5G034670/CsaV3_6G004330/CsaV3_6G036380/CsaV3_7G007920	6
BP	GO:0005992	trehalose biosynthetic process	100230	14/6278	0.348226	0.825949	CsaV3_1G001640/CsaV3_1G022900/CsaV3_3G016150/CsaV3_5G031700/CsaV3_6G045560/CsaV3_6G051060	CsaV3_1G001640/CsaV3_1G022900/CsaV3_3G016150/CsaV3_5G031700/CsaV3_6G045560/CsaV3_6G051060	6
BP	GO:0006576	cellular biogenic amine metabolic process	100230	14/6278	0.348226	0.825949	CsaV3_1G003170/CsaV3_1G031480/CsaV3_2G007750/CsaV3_3G020560/CsaV3_6G005510/CsaV3_7G008280	CsaV3_1G003170/CsaV3_1G031480/CsaV3_2G007750/CsaV3_3G020560/CsaV3_6G005510/CsaV3_7G008280	6
BP	GO:0006865	amino acid transport	100230	14/6278	0.348226	0.825949	CsaV3_4G007780/CsaV3_4G011960/CsaV3_5G034670/CsaV3_6G004330/CsaV3_6G036380/CsaV3_7G007920	CsaV3_4G007780/CsaV3_4G011960/CsaV3_5G034670/CsaV3_6G004330/CsaV3_6G036380/CsaV3_7G007920	6
BP	GO:0044106	cellular amine metabolic process	100230	14/6278	0.348226	0.825949	CsaV3_1G003170/CsaV3_1G031480/CsaV3_2G007750/CsaV3_3G020560/CsaV3_6G005510/CsaV3_7G008280	CsaV3_1G003170/CsaV3_1G031480/CsaV3_2G007750/CsaV3_3G020560/CsaV3_6G005510/CsaV3_7G008280	6
BP	GO:0072527	pyrimidine-containing compound metabolic process	100230	14/6278	0.348226	0.825949	CsaV3_2G028630/CsaV3_3G007170/CsaV3_5G012850/CsaV3_7G023220/CsaV3_7G029140/CsaV3_7G029810	CsaV3_2G028630/CsaV3_3G007170/CsaV3_5G012850/CsaV3_7G023220/CsaV3_7G029140/CsaV3_7G029810	6
BP	GO:0070647	protein modification by small protein conjugation or removal	24/2174	64/6278	0.357757	0.825949	CsaV3_1G002070/CsaV3_1G008240/CsaV3_1G008380/CsaV3_1G017170/CsaV3_1G034080/CsaV3_1G043840/CsaV3_1G043860/CsaV3_1G045780/CsaV3_2G007460/CsaV3_2G025400/CsaV3_2G031540/CsaV3_3G001680/CsaV3_3G017250/CsaV3_3G018440/CsaV3_3G021120/CsaV3_3G047940/CsaV3_4G008890/CsaV3_4G036280/CsaV3_5G006240/CsaV3_5G031630/CsaV3_5G033570/CsaV3_6G000580/CsaV3_6G010170/CsaV3_6G041810	CsaV3_1G002070/CsaV3_1G008240/CsaV3_1G008380/CsaV3_1G017170/CsaV3_1G034080/CsaV3_1G043840/CsaV3_1G043860/CsaV3_1G045780/CsaV3_2G007460/CsaV3_2G025400/CsaV3_2G031540/CsaV3_3G001680/CsaV3_3G017250/CsaV3_3G018440/CsaV3_3G021120/CsaV3_3G047940/CsaV3_4G008890/CsaV3_4G036280/CsaV3_5G006240/CsaV3_5G031630/CsaV3_5G033570/CsaV3_6G000580/CsaV3_6G010170/CsaV3_6G041810	24
BP	GO:0006325	chromatin organization	100383	28/6278	0.367858	0.825949	CsaV3_1G005360/CsaV3_3G011580/CsaV3_3G027790/CsaV3_3G040650/CsaV3_4G000180/CsaV3_5G028310/CsaV3_5G028660/CsaV3_5G037970/CsaV3_6G007420/CsaV3_6G036780/CsaV3_6G044170	CsaV3_1G005360/CsaV3_3G011580/CsaV3_3G027790/CsaV3_3G040650/CsaV3_4G000180/CsaV3_5G028310/CsaV3_5G028660/CsaV3_5G037970/CsaV3_6G007420/CsaV3_6G036780/CsaV3_6G044170	11
BP	GO:0098656	anion transmembrane transport	100260	17/6278	0.368634	0.825949	CsaV3_1G000720/CsaV3_4G007780/CsaV3_4G011960/CsaV3_5G034670/CsaV3_6G004330/CsaV3_6G036380/CsaV3_7G007920	CsaV3_1G000720/CsaV3_4G007780/CsaV3_4G011960/CsaV3_5G034670/CsaV3_6G004330/CsaV3_6G036380/CsaV3_7G007920	7
BP	GO:1903825	organic acid transmembrane transport	100260	17/6278	0.368634	0.825949	CsaV3_1G000720/CsaV3_4G007780/CsaV3_4G011960/CsaV3_5G034670/CsaV3_6G004330/CsaV3_6G036380/CsaV3_7G007920	CsaV3_1G000720/CsaV3_4G007780/CsaV3_4G011960/CsaV3_5G034670/CsaV3_6G004330/CsaV3_6G036380/CsaV3_7G007920	7
BP	GO:1905039	carboxylic acid transmembrane transport	100260	17/6278	0.368634	0.825949	CsaV3_1G000720/CsaV3_4G007780/CsaV3_4G011960/CsaV3_5G034670/CsaV3_6G004330/CsaV3_6G036380/CsaV3_7G007920	CsaV3_1G000720/CsaV3_4G007780/CsaV3_4G011960/CsaV3_5G034670/CsaV3_6G004330/CsaV3_6G036380/CsaV3_7G007920	7
BP	GO:0070085	glycosylation	16/2174	42/6278	0.372416	0.825949	CsaV3_1G008060/CsaV3_1G010720/CsaV3_1G022990/CsaV3_1G024100/CsaV3_1G044800/CsaV3_2G014400/CsaV3_3G019150/CsaV3_5G001510/CsaV3_5G027050/CsaV3_5G031040/CsaV3_5G032120/CsaV3_5G032750/CsaV3_5G036240/CsaV3_6G031390/CsaV3_7G008560/CsaV3_7G025750	CsaV3_1G008060/CsaV3_1G010720/CsaV3_1G022990/CsaV3_1G024100/CsaV3_1G044800/CsaV3_2G014400/CsaV3_3G019150/CsaV3_5G001510/CsaV3_5G027050/CsaV3_5G031040/CsaV3_5G032120/CsaV3_5G032750/CsaV3_5G036240/CsaV3_6G031390/CsaV3_7G008560/CsaV3_7G025750	16
BP	GO:0006650	glycerophospholipid metabolic process	100413	31/6278	0.379582	0.825949	CsaV3_3G008320/CsaV3_3G036240/CsaV3_4G022060/CsaV3_4G028490/CsaV3_5G013590/CsaV3_5G024510/CsaV3_5G028680/CsaV3_5G036790/CsaV3_6G006390/CsaV3_6G037410/CsaV3_6G041580/CsaV3_7G021690	CsaV3_3G008320/CsaV3_3G036240/CsaV3_4G022060/CsaV3_4G028490/CsaV3_5G013590/CsaV3_5G024510/CsaV3_5G028680/CsaV3_5G036790/CsaV3_6G006390/CsaV3_6G037410/CsaV3_6G041580/CsaV3_7G021690	12
BP	GO:0051641	cellular localization	41/2174	113/6278	0.388902	0.825949	CsaV3_1G006710/CsaV3_1G014870/CsaV3_1G023100/CsaV3_1G034030/CsaV3_1G036760/CsaV3_2G007560/CsaV3_2G012420/CsaV3_2G013670/CsaV3_2G014650/CsaV3_2G015150/CsaV3_2G031010/CsaV3_3G033250/CsaV3_3G041240/CsaV3_3G047380/CsaV3_3G048660/CsaV3_4G026140/CsaV3_5G000990/CsaV3_5G003280/CsaV3_5G030580/CsaV3_5G033760/CsaV3_5G036050/CsaV3_5G038260/CsaV3_6G001890/CsaV3_6G004490/CsaV3_6G006180/CsaV3_6G006390/CsaV3_6G0…	CsaV3_1G006710/CsaV3_1G014870/CsaV3_1G023100/CsaV3_1G034030/CsaV3_1G036760/CsaV3_2G007560/CsaV3_2G012420/CsaV3_2G013670/CsaV3_2G014650/CsaV3_2G015150/CsaV3_2G031010/CsaV3_3G033250/CsaV3_3G041240/CsaV3_3G047380/CsaV3_3G048660/CsaV3_4G026140/CsaV3_5G000990/CsaV3_5G003280/CsaV3_5G030580/CsaV3_5G033760/CsaV3_5G036050/CsaV3_5G038260/CsaV3_6G001890/CsaV3_6G004490/CsaV3_6G006180/CsaV3_6G006390/CsaV3_6G0…	41
BP	GO:0006366	transcription by RNA polymerase II	100322	23/6278	0.399106	0.825949	CsaV3_2G001190/CsaV3_2G033370/CsaV3_3G000870/CsaV3_3G028740/CsaV3_4G006050/CsaV3_4G024350/CsaV3_4G031690/CsaV3_7G005510/CsaV3_7G027100	CsaV3_2G001190/CsaV3_2G033370/CsaV3_3G000870/CsaV3_3G028740/CsaV3_4G006050/CsaV3_4G024350/CsaV3_4G031690/CsaV3_7G005510/CsaV3_7G027100	9
BP	GO:0046034	ATP metabolic process	20/2174	54/6278	0.403858	0.825949	CsaV3_1G003090/CsaV3_1G005960/CsaV3_1G035920/CsaV3_2G001570/CsaV3_2G013320/CsaV3_2G030420/CsaV3_3G007840/CsaV3_3G010470/CsaV3_3G021780/CsaV3_3G035920/CsaV3_4G037690/CsaV3_5G029170/CsaV3_5G034810/CsaV3_5G036470/CsaV3_6G040330/CsaV3_6G040390/CsaV3_6G040430/CsaV3_6G048680/CsaV3_6G049050/CsaV3_7G022930	CsaV3_1G003090/CsaV3_1G005960/CsaV3_1G035920/CsaV3_2G001570/CsaV3_2G013320/CsaV3_2G030420/CsaV3_3G007840/CsaV3_3G010470/CsaV3_3G021780/CsaV3_3G035920/CsaV3_4G037690/CsaV3_5G029170/CsaV3_5G034810/CsaV3_5G036470/CsaV3_6G040330/CsaV3_6G040390/CsaV3_6G040430/CsaV3_6G048680/CsaV3_6G049050/CsaV3_7G022930	20
BP	GO:0006081	cellular aldehyde metabolic process	100199	1599368	0.405813	0.825949	CsaV3_1G009520/CsaV3_1G037750/CsaV3_4G006330/CsaV3_5G028490/CsaV3_7G010240	CsaV3_1G009520/CsaV3_1G037750/CsaV3_4G006330/CsaV3_5G028490/CsaV3_7G010240	5
BP	GO:0009073	aromatic amino acid family biosynthetic process	100199	1599368	0.405813	0.825949	CsaV3_3G004760/CsaV3_3G041590/CsaV3_6G014760/CsaV3_6G045310/CsaV3_7G006730	CsaV3_3G004760/CsaV3_3G041590/CsaV3_6G014760/CsaV3_6G045310/CsaV3_7G006730	5
BP	GO:0009119	ribonucleoside metabolic process	100199	1599368	0.405813	0.825949	CsaV3_3G007170/CsaV3_3G015600/CsaV3_4G000980/CsaV3_4G008710/CsaV3_5G002770	CsaV3_3G007170/CsaV3_3G015600/CsaV3_4G000980/CsaV3_4G008710/CsaV3_5G002770	5
BP	GO:0032271	regulation of protein polymerization	100199	1599368	0.405813	0.825949	CsaV3_1G043050/CsaV3_2G006740/CsaV3_3G003930/CsaV3_4G031280/CsaV3_6G004830	CsaV3_1G043050/CsaV3_2G006740/CsaV3_3G003930/CsaV3_4G031280/CsaV3_6G004830	5
BP	GO:0043254	regulation of protein complex assembly	100199	1599368	0.405813	0.825949	CsaV3_1G043050/CsaV3_2G006740/CsaV3_3G003930/CsaV3_4G031280/CsaV3_6G004830	CsaV3_1G043050/CsaV3_2G006740/CsaV3_3G003930/CsaV3_4G031280/CsaV3_6G004830	5
BP	GO:0048583	regulation of response to stimulus	100199	1599368	0.405813	0.825949	CsaV3_3G009610/CsaV3_3G010020/CsaV3_3G031710/CsaV3_5G008330/CsaV3_7G002160	CsaV3_3G009610/CsaV3_3G010020/CsaV3_3G031710/CsaV3_5G008330/CsaV3_7G002160	5
BP	GO:0051258	protein polymerization	100199	1599368	0.405813	0.825949	CsaV3_1G043050/CsaV3_2G006740/CsaV3_3G003930/CsaV3_4G031280/CsaV3_6G004830	CsaV3_1G043050/CsaV3_2G006740/CsaV3_3G003930/CsaV3_4G031280/CsaV3_6G004830	5
BP	GO:0051493	regulation of cytoskeleton organization	100199	1599368	0.405813	0.825949	CsaV3_1G043050/CsaV3_2G006740/CsaV3_3G003930/CsaV3_4G031280/CsaV3_6G004830	CsaV3_1G043050/CsaV3_2G006740/CsaV3_3G003930/CsaV3_4G031280/CsaV3_6G004830	5
BP	GO:0072528	pyrimidine-containing compound biosynthetic process	100199	1599368	0.405813	0.825949	CsaV3_3G007170/CsaV3_5G012850/CsaV3_7G023220/CsaV3_7G029140/CsaV3_7G029810	CsaV3_3G007170/CsaV3_5G012850/CsaV3_7G023220/CsaV3_7G029140/CsaV3_7G029810	5
BP	GO:0097435	supramolecular fiber organization	100199	1599368	0.405813	0.825949	CsaV3_1G043050/CsaV3_2G006740/CsaV3_3G003930/CsaV3_4G031280/CsaV3_6G004830	CsaV3_1G043050/CsaV3_2G006740/CsaV3_3G003930/CsaV3_4G031280/CsaV3_6G004830	5
BP	GO:1902903	regulation of supramolecular fiber organization	100199	1599368	0.405813	0.825949	CsaV3_1G043050/CsaV3_2G006740/CsaV3_3G003930/CsaV3_4G031280/CsaV3_6G004830	CsaV3_1G043050/CsaV3_2G006740/CsaV3_3G003930/CsaV3_4G031280/CsaV3_6G004830	5
BP	GO:0009126	purine nucleoside monophosphate metabolic process	21/2174	57/6278	0.410527	0.825949	CsaV3_1G003090/CsaV3_1G005960/CsaV3_1G035920/CsaV3_2G001570/CsaV3_2G013320/CsaV3_2G030420/CsaV3_3G007840/CsaV3_3G010470/CsaV3_3G021780/CsaV3_3G035920/CsaV3_4G037690/CsaV3_5G002770/CsaV3_5G029170/CsaV3_5G034810/CsaV3_5G036470/CsaV3_6G040330/CsaV3_6G040390/CsaV3_6G040430/CsaV3_6G048680/CsaV3_6G049050/CsaV3_7G022930	CsaV3_1G003090/CsaV3_1G005960/CsaV3_1G035920/CsaV3_2G001570/CsaV3_2G013320/CsaV3_2G030420/CsaV3_3G007840/CsaV3_3G010470/CsaV3_3G021780/CsaV3_3G035920/CsaV3_4G037690/CsaV3_5G002770/CsaV3_5G029170/CsaV3_5G034810/CsaV3_5G036470/CsaV3_6G040330/CsaV3_6G040390/CsaV3_6G040430/CsaV3_6G048680/CsaV3_6G049050/CsaV3_7G022930	21
BP	GO:0009144	purine nucleoside triphosphate metabolic process	21/2174	57/6278	0.410527	0.825949	CsaV3_1G003090/CsaV3_1G005960/CsaV3_1G035920/CsaV3_2G001570/CsaV3_2G013320/CsaV3_2G030420/CsaV3_3G007170/CsaV3_3G007840/CsaV3_3G010470/CsaV3_3G021780/CsaV3_3G035920/CsaV3_4G037690/CsaV3_5G029170/CsaV3_5G034810/CsaV3_5G036470/CsaV3_6G040330/CsaV3_6G040390/CsaV3_6G040430/CsaV3_6G048680/CsaV3_6G049050/CsaV3_7G022930	CsaV3_1G003090/CsaV3_1G005960/CsaV3_1G035920/CsaV3_2G001570/CsaV3_2G013320/CsaV3_2G030420/CsaV3_3G007170/CsaV3_3G007840/CsaV3_3G010470/CsaV3_3G021780/CsaV3_3G035920/CsaV3_4G037690/CsaV3_5G029170/CsaV3_5G034810/CsaV3_5G036470/CsaV3_6G040330/CsaV3_6G040390/CsaV3_6G040430/CsaV3_6G048680/CsaV3_6G049050/CsaV3_7G022930	21
BP	GO:0009161	ribonucleoside monophosphate metabolic process	21/2174	57/6278	0.410527	0.825949	CsaV3_1G003090/CsaV3_1G005960/CsaV3_1G035920/CsaV3_2G001570/CsaV3_2G013320/CsaV3_2G030420/CsaV3_3G007840/CsaV3_3G010470/CsaV3_3G021780/CsaV3_3G035920/CsaV3_4G037690/CsaV3_5G002770/CsaV3_5G029170/CsaV3_5G034810/CsaV3_5G036470/CsaV3_6G040330/CsaV3_6G040390/CsaV3_6G040430/CsaV3_6G048680/CsaV3_6G049050/CsaV3_7G022930	CsaV3_1G003090/CsaV3_1G005960/CsaV3_1G035920/CsaV3_2G001570/CsaV3_2G013320/CsaV3_2G030420/CsaV3_3G007840/CsaV3_3G010470/CsaV3_3G021780/CsaV3_3G035920/CsaV3_4G037690/CsaV3_5G002770/CsaV3_5G029170/CsaV3_5G034810/CsaV3_5G036470/CsaV3_6G040330/CsaV3_6G040390/CsaV3_6G040430/CsaV3_6G048680/CsaV3_6G049050/CsaV3_7G022930	21
BP	GO:0009167	purine ribonucleoside monophosphate metabolic process	21/2174	57/6278	0.410527	0.825949	CsaV3_1G003090/CsaV3_1G005960/CsaV3_1G035920/CsaV3_2G001570/CsaV3_2G013320/CsaV3_2G030420/CsaV3_3G007840/CsaV3_3G010470/CsaV3_3G021780/CsaV3_3G035920/CsaV3_4G037690/CsaV3_5G002770/CsaV3_5G029170/CsaV3_5G034810/CsaV3_5G036470/CsaV3_6G040330/CsaV3_6G040390/CsaV3_6G040430/CsaV3_6G048680/CsaV3_6G049050/CsaV3_7G022930	CsaV3_1G003090/CsaV3_1G005960/CsaV3_1G035920/CsaV3_2G001570/CsaV3_2G013320/CsaV3_2G030420/CsaV3_3G007840/CsaV3_3G010470/CsaV3_3G021780/CsaV3_3G035920/CsaV3_4G037690/CsaV3_5G002770/CsaV3_5G029170/CsaV3_5G034810/CsaV3_5G036470/CsaV3_6G040330/CsaV3_6G040390/CsaV3_6G040430/CsaV3_6G048680/CsaV3_6G049050/CsaV3_7G022930	21
BP	GO:0009199	ribonucleoside triphosphate metabolic process	21/2174	57/6278	0.410527	0.825949	CsaV3_1G003090/CsaV3_1G005960/CsaV3_1G035920/CsaV3_2G001570/CsaV3_2G013320/CsaV3_2G030420/CsaV3_3G007170/CsaV3_3G007840/CsaV3_3G010470/CsaV3_3G021780/CsaV3_3G035920/CsaV3_4G037690/CsaV3_5G029170/CsaV3_5G034810/CsaV3_5G036470/CsaV3_6G040330/CsaV3_6G040390/CsaV3_6G040430/CsaV3_6G048680/CsaV3_6G049050/CsaV3_7G022930	CsaV3_1G003090/CsaV3_1G005960/CsaV3_1G035920/CsaV3_2G001570/CsaV3_2G013320/CsaV3_2G030420/CsaV3_3G007170/CsaV3_3G007840/CsaV3_3G010470/CsaV3_3G021780/CsaV3_3G035920/CsaV3_4G037690/CsaV3_5G029170/CsaV3_5G034810/CsaV3_5G036470/CsaV3_6G040330/CsaV3_6G040390/CsaV3_6G040430/CsaV3_6G048680/CsaV3_6G049050/CsaV3_7G022930	21
BP	GO:0009205	purine ribonucleoside triphosphate metabolic process	21/2174	57/6278	0.410527	0.825949	CsaV3_1G003090/CsaV3_1G005960/CsaV3_1G035920/CsaV3_2G001570/CsaV3_2G013320/CsaV3_2G030420/CsaV3_3G007170/CsaV3_3G007840/CsaV3_3G010470/CsaV3_3G021780/CsaV3_3G035920/CsaV3_4G037690/CsaV3_5G029170/CsaV3_5G034810/CsaV3_5G036470/CsaV3_6G040330/CsaV3_6G040390/CsaV3_6G040430/CsaV3_6G048680/CsaV3_6G049050/CsaV3_7G022930	CsaV3_1G003090/CsaV3_1G005960/CsaV3_1G035920/CsaV3_2G001570/CsaV3_2G013320/CsaV3_2G030420/CsaV3_3G007170/CsaV3_3G007840/CsaV3_3G010470/CsaV3_3G021780/CsaV3_3G035920/CsaV3_4G037690/CsaV3_5G029170/CsaV3_5G034810/CsaV3_5G036470/CsaV3_6G040330/CsaV3_6G040390/CsaV3_6G040430/CsaV3_6G048680/CsaV3_6G049050/CsaV3_7G022930	21
BP	GO:0019693	ribose phosphate metabolic process	28/2174	77/6278	0.415732	0.825949	CsaV3_1G003090/CsaV3_1G005960/CsaV3_1G035920/CsaV3_1G037750/CsaV3_2G001570/CsaV3_2G013320/CsaV3_2G030420/CsaV3_3G007170/CsaV3_3G007840/CsaV3_3G010470/CsaV3_3G015600/CsaV3_3G021780/CsaV3_3G035920/CsaV3_4G000980/CsaV3_4G006330/CsaV3_4G008710/CsaV3_4G037690/CsaV3_5G002770/CsaV3_5G028490/CsaV3_5G029170/CsaV3_5G034810/CsaV3_5G036470/CsaV3_6G040330/CsaV3_6G040390/CsaV3_6G040430/CsaV3_6G048680/CsaV3_6G0…	CsaV3_1G003090/CsaV3_1G005960/CsaV3_1G035920/CsaV3_1G037750/CsaV3_2G001570/CsaV3_2G013320/CsaV3_2G030420/CsaV3_3G007170/CsaV3_3G007840/CsaV3_3G010470/CsaV3_3G015600/CsaV3_3G021780/CsaV3_3G035920/CsaV3_4G000980/CsaV3_4G006330/CsaV3_4G008710/CsaV3_4G037690/CsaV3_5G002770/CsaV3_5G028490/CsaV3_5G029170/CsaV3_5G034810/CsaV3_5G036470/CsaV3_6G040330/CsaV3_6G040390/CsaV3_6G040430/CsaV3_6G048680/CsaV3_6G0…	28
BP	GO:0000271	polysaccharide biosynthetic process	16/2174	43/6278	0.416268	0.825949	CsaV3_1G003390/CsaV3_1G042280/CsaV3_1G042290/CsaV3_2G018300/CsaV3_2G034720/CsaV3_2G036170/CsaV3_3G046510/CsaV3_4G001040/CsaV3_4G006800/CsaV3_4G011810/CsaV3_6G002560/CsaV3_6G033720/CsaV3_7G011470/CsaV3_7G011490/CsaV3_7G031050/CsaV3_7G031450	CsaV3_1G003390/CsaV3_1G042280/CsaV3_1G042290/CsaV3_2G018300/CsaV3_2G034720/CsaV3_2G036170/CsaV3_3G046510/CsaV3_4G001040/CsaV3_4G006800/CsaV3_4G011810/CsaV3_6G002560/CsaV3_6G033720/CsaV3_7G011470/CsaV3_7G011490/CsaV3_7G031050/CsaV3_7G031450	16
BP	GO:0009250	glucan biosynthetic process	16/2174	43/6278	0.416268	0.825949	CsaV3_1G003390/CsaV3_1G042280/CsaV3_1G042290/CsaV3_2G018300/CsaV3_2G034720/CsaV3_2G036170/CsaV3_3G046510/CsaV3_4G001040/CsaV3_4G006800/CsaV3_4G011810/CsaV3_6G002560/CsaV3_6G033720/CsaV3_7G011470/CsaV3_7G011490/CsaV3_7G031050/CsaV3_7G031450	CsaV3_1G003390/CsaV3_1G042280/CsaV3_1G042290/CsaV3_2G018300/CsaV3_2G034720/CsaV3_2G036170/CsaV3_3G046510/CsaV3_4G001040/CsaV3_4G006800/CsaV3_4G011810/CsaV3_6G002560/CsaV3_6G033720/CsaV3_7G011470/CsaV3_7G011490/CsaV3_7G031050/CsaV3_7G031450	16
BP	GO:0033692	cellular polysaccharide biosynthetic process	16/2174	43/6278	0.416268	0.825949	CsaV3_1G003390/CsaV3_1G042280/CsaV3_1G042290/CsaV3_2G018300/CsaV3_2G034720/CsaV3_2G036170/CsaV3_3G046510/CsaV3_4G001040/CsaV3_4G006800/CsaV3_4G011810/CsaV3_6G002560/CsaV3_6G033720/CsaV3_7G011470/CsaV3_7G011490/CsaV3_7G031050/CsaV3_7G031450	CsaV3_1G003390/CsaV3_1G042280/CsaV3_1G042290/CsaV3_2G018300/CsaV3_2G034720/CsaV3_2G036170/CsaV3_3G046510/CsaV3_4G001040/CsaV3_4G006800/CsaV3_4G011810/CsaV3_6G002560/CsaV3_6G033720/CsaV3_7G011470/CsaV3_7G011490/CsaV3_7G031050/CsaV3_7G031450	16
BP	GO:0034655	nucleobase-containing compound catabolic process	16/2174	43/6278	0.416268	0.825949	CsaV3_1G003090/CsaV3_1G035920/CsaV3_1G041450/CsaV3_2G013320/CsaV3_2G030420/CsaV3_3G021780/CsaV3_3G035920/CsaV3_4G037690/CsaV3_5G029170/CsaV3_5G034420/CsaV3_6G014380/CsaV3_6G040330/CsaV3_6G040390/CsaV3_6G040430/CsaV3_6G048680/CsaV3_7G022930	CsaV3_1G003090/CsaV3_1G035920/CsaV3_1G041450/CsaV3_2G013320/CsaV3_2G030420/CsaV3_3G021780/CsaV3_3G035920/CsaV3_4G037690/CsaV3_5G029170/CsaV3_5G034420/CsaV3_6G014380/CsaV3_6G040330/CsaV3_6G040390/CsaV3_6G040430/CsaV3_6G048680/CsaV3_7G022930	16
BP	GO:0051273	beta-glucan metabolic process	16/2174	43/6278	0.416268	0.825949	CsaV3_1G003390/CsaV3_1G042280/CsaV3_1G042290/CsaV3_2G018300/CsaV3_2G034720/CsaV3_2G036170/CsaV3_3G046510/CsaV3_4G001040/CsaV3_4G006800/CsaV3_4G011810/CsaV3_6G002560/CsaV3_6G033720/CsaV3_7G011470/CsaV3_7G011490/CsaV3_7G031050/CsaV3_7G031450	CsaV3_1G003390/CsaV3_1G042280/CsaV3_1G042290/CsaV3_2G018300/CsaV3_2G034720/CsaV3_2G036170/CsaV3_3G046510/CsaV3_4G001040/CsaV3_4G006800/CsaV3_4G011810/CsaV3_6G002560/CsaV3_6G033720/CsaV3_7G011470/CsaV3_7G011490/CsaV3_7G031050/CsaV3_7G031450	16
BP	GO:0051274	beta-glucan biosynthetic process	16/2174	43/6278	0.416268	0.825949	CsaV3_1G003390/CsaV3_1G042280/CsaV3_1G042290/CsaV3_2G018300/CsaV3_2G034720/CsaV3_2G036170/CsaV3_3G046510/CsaV3_4G001040/CsaV3_4G006800/CsaV3_4G011810/CsaV3_6G002560/CsaV3_6G033720/CsaV3_7G011470/CsaV3_7G011490/CsaV3_7G031050/CsaV3_7G031450	CsaV3_1G003390/CsaV3_1G042280/CsaV3_1G042290/CsaV3_2G018300/CsaV3_2G034720/CsaV3_2G036170/CsaV3_3G046510/CsaV3_4G001040/CsaV3_4G006800/CsaV3_4G011810/CsaV3_6G002560/CsaV3_6G033720/CsaV3_7G011470/CsaV3_7G011490/CsaV3_7G031050/CsaV3_7G031450	16
BP	GO:0046488	phosphatidylinositol metabolic process	100383	29/6278	0.421526	0.825949	CsaV3_3G008320/CsaV3_3G036240/CsaV3_4G022060/CsaV3_4G028490/CsaV3_5G013590/CsaV3_5G024510/CsaV3_5G036790/CsaV3_6G006390/CsaV3_6G037410/CsaV3_6G041580/CsaV3_7G021690	CsaV3_3G008320/CsaV3_3G036240/CsaV3_4G022060/CsaV3_4G028490/CsaV3_5G013590/CsaV3_5G024510/CsaV3_5G036790/CsaV3_6G006390/CsaV3_6G037410/CsaV3_6G041580/CsaV3_7G021690	11
BP	GO:0048522	positive regulation of cellular process	100230	15/6278	0.423566	0.825949	CsaV3_1G028950/CsaV3_1G043050/CsaV3_3G003930/CsaV3_3G028740/CsaV3_4G031280/CsaV3_5G033100	CsaV3_1G028950/CsaV3_1G043050/CsaV3_3G003930/CsaV3_3G028740/CsaV3_4G031280/CsaV3_5G033100	6
BP	GO:0048523	negative regulation of cellular process	100230	15/6278	0.423566	0.825949	CsaV3_2G003690/CsaV3_2G006740/CsaV3_6G003670/CsaV3_6G004830/CsaV3_7G008680/CsaV3_7G030200	CsaV3_2G003690/CsaV3_2G006740/CsaV3_6G003670/CsaV3_6G004830/CsaV3_7G008680/CsaV3_7G030200	6
BP	GO:0051246	regulation of protein metabolic process	100230	15/6278	0.423566	0.825949	CsaV3_1G028950/CsaV3_2G005220/CsaV3_5G033100/CsaV3_6G003670/CsaV3_6G006240/CsaV3_7G028110	CsaV3_1G028950/CsaV3_2G005220/CsaV3_5G033100/CsaV3_6G003670/CsaV3_6G006240/CsaV3_7G028110	6
BP	GO:0006644	phospholipid metabolic process	17/2174	46/6278	0.423663	0.825949	CsaV3_3G008320/CsaV3_3G036240/CsaV3_4G022060/CsaV3_4G028490/CsaV3_5G013590/CsaV3_5G024510/CsaV3_5G028680/CsaV3_5G033710/CsaV3_5G036790/CsaV3_6G006390/CsaV3_6G037410/CsaV3_6G041580/CsaV3_6G049130/CsaV3_7G006180/CsaV3_7G010240/CsaV3_7G021690/CsaV3_UNG190490	CsaV3_3G008320/CsaV3_3G036240/CsaV3_4G022060/CsaV3_4G028490/CsaV3_5G013590/CsaV3_5G024510/CsaV3_5G028680/CsaV3_5G033710/CsaV3_5G036790/CsaV3_6G006390/CsaV3_6G037410/CsaV3_6G041580/CsaV3_6G049130/CsaV3_7G006180/CsaV3_7G010240/CsaV3_7G021690/CsaV3_UNG190490	17
BP	GO:0051188	cofactor biosynthetic process	24/2174	66/6278	0.428465	0.828424	CsaV3_1G000080/CsaV3_1G003090/CsaV3_1G008930/CsaV3_1G035920/CsaV3_1G042920/CsaV3_2G013320/CsaV3_2G030420/CsaV3_3G009100/CsaV3_3G021780/CsaV3_3G035920/CsaV3_4G007220/CsaV3_4G008050/CsaV3_4G013530/CsaV3_4G037690/CsaV3_5G004930/CsaV3_5G008630/CsaV3_5G029170/CsaV3_6G013410/CsaV3_6G040330/CsaV3_6G040390/CsaV3_6G040430/CsaV3_6G048680/CsaV3_7G022930/CsaV3_7G029140	CsaV3_1G000080/CsaV3_1G003090/CsaV3_1G008930/CsaV3_1G035920/CsaV3_1G042920/CsaV3_2G013320/CsaV3_2G030420/CsaV3_3G009100/CsaV3_3G021780/CsaV3_3G035920/CsaV3_4G007220/CsaV3_4G008050/CsaV3_4G013530/CsaV3_4G037690/CsaV3_5G004930/CsaV3_5G008630/CsaV3_5G029170/CsaV3_6G013410/CsaV3_6G040330/CsaV3_6G040390/CsaV3_6G040430/CsaV3_6G048680/CsaV3_7G022930/CsaV3_7G029140	24
BP	GO:0006629	lipid metabolic process	88/2174	249/6278	0.428831	0.828424	CsaV3_1G001870/CsaV3_1G006500/CsaV3_1G010600/CsaV3_1G010910/CsaV3_1G012180/CsaV3_1G029290/CsaV3_1G030920/CsaV3_1G036200/CsaV3_1G036250/CsaV3_1G044800/CsaV3_2G001370/CsaV3_2G010330/CsaV3_2G011410/CsaV3_2G028690/CsaV3_3G003250/CsaV3_3G003490/CsaV3_3G004650/CsaV3_3G006740/CsaV3_3G006930/CsaV3_3G008180/CsaV3_3G008190/CsaV3_3G008320/CsaV3_3G010300/CsaV3_3G015980/CsaV3_3G016490/CsaV3_3G017450/CsaV3_3G0…	CsaV3_1G001870/CsaV3_1G006500/CsaV3_1G010600/CsaV3_1G010910/CsaV3_1G012180/CsaV3_1G029290/CsaV3_1G030920/CsaV3_1G036200/CsaV3_1G036250/CsaV3_1G044800/CsaV3_2G001370/CsaV3_2G010330/CsaV3_2G011410/CsaV3_2G028690/CsaV3_3G003250/CsaV3_3G003490/CsaV3_3G004650/CsaV3_3G006740/CsaV3_3G006930/CsaV3_3G008180/CsaV3_3G008190/CsaV3_3G008320/CsaV3_3G010300/CsaV3_3G015980/CsaV3_3G016490/CsaV3_3G017450/CsaV3_3G0…	88
BP	GO:0072330	monocarboxylic acid biosynthetic process	25/2174	69/6278	0.433868	0.834361	CsaV3_1G003090/CsaV3_1G030920/CsaV3_1G035920/CsaV3_2G013320/CsaV3_2G028690/CsaV3_2G030420/CsaV3_3G003250/CsaV3_3G010300/CsaV3_3G016490/CsaV3_3G017450/CsaV3_3G021780/CsaV3_3G035920/CsaV3_4G028790/CsaV3_4G037690/CsaV3_5G002520/CsaV3_5G003990/CsaV3_5G023610/CsaV3_5G029170/CsaV3_6G016090/CsaV3_6G040330/CsaV3_6G040390/CsaV3_6G040430/CsaV3_6G048680/CsaV3_6G052510/CsaV3_7G022930	CsaV3_1G003090/CsaV3_1G030920/CsaV3_1G035920/CsaV3_2G013320/CsaV3_2G028690/CsaV3_2G030420/CsaV3_3G003250/CsaV3_3G010300/CsaV3_3G016490/CsaV3_3G017450/CsaV3_3G021780/CsaV3_3G035920/CsaV3_4G028790/CsaV3_4G037690/CsaV3_5G002520/CsaV3_5G003990/CsaV3_5G023610/CsaV3_5G029170/CsaV3_6G016090/CsaV3_6G040330/CsaV3_6G040390/CsaV3_6G040430/CsaV3_6G048680/CsaV3_6G052510/CsaV3_7G022930	25
BP	GO:0046486	glycerolipid metabolic process	13/2174	35/6278	0.439221	0.834988	CsaV3_3G008320/CsaV3_3G036240/CsaV3_4G022060/CsaV3_4G028490/CsaV3_5G013590/CsaV3_5G024510/CsaV3_5G028680/CsaV3_5G036790/CsaV3_6G006390/CsaV3_6G037410/CsaV3_6G041580/CsaV3_7G008480/CsaV3_7G021690	CsaV3_3G008320/CsaV3_3G036240/CsaV3_4G022060/CsaV3_4G028490/CsaV3_5G013590/CsaV3_5G024510/CsaV3_5G028680/CsaV3_5G036790/CsaV3_6G006390/CsaV3_6G037410/CsaV3_6G041580/CsaV3_7G008480/CsaV3_7G021690	13
BP	GO:0006486	protein glycosylation	14/2174	38/6278	0.446846	0.834988	CsaV3_1G008060/CsaV3_1G010720/CsaV3_1G022990/CsaV3_1G024100/CsaV3_2G014400/CsaV3_3G019150/CsaV3_5G001510/CsaV3_5G027050/CsaV3_5G031040/CsaV3_5G032120/CsaV3_5G032750/CsaV3_5G036240/CsaV3_6G031390/CsaV3_7G008560	CsaV3_1G008060/CsaV3_1G010720/CsaV3_1G022990/CsaV3_1G024100/CsaV3_2G014400/CsaV3_3G019150/CsaV3_5G001510/CsaV3_5G027050/CsaV3_5G031040/CsaV3_5G032120/CsaV3_5G032750/CsaV3_5G036240/CsaV3_6G031390/CsaV3_7G008560	14
BP	GO:0043413	macromolecule glycosylation	14/2174	38/6278	0.446846	0.834988	CsaV3_1G008060/CsaV3_1G010720/CsaV3_1G022990/CsaV3_1G024100/CsaV3_2G014400/CsaV3_3G019150/CsaV3_5G001510/CsaV3_5G027050/CsaV3_5G031040/CsaV3_5G032120/CsaV3_5G032750/CsaV3_5G036240/CsaV3_6G031390/CsaV3_7G008560	CsaV3_1G008060/CsaV3_1G010720/CsaV3_1G022990/CsaV3_1G024100/CsaV3_2G014400/CsaV3_3G019150/CsaV3_5G001510/CsaV3_5G027050/CsaV3_5G031040/CsaV3_5G032120/CsaV3_5G032750/CsaV3_5G036240/CsaV3_6G031390/CsaV3_7G008560	14
BP	GO:0009123	nucleoside monophosphate metabolic process	21/2174	58/6278	0.448748	0.834988	CsaV3_1G003090/CsaV3_1G005960/CsaV3_1G035920/CsaV3_2G001570/CsaV3_2G013320/CsaV3_2G030420/CsaV3_3G007840/CsaV3_3G010470/CsaV3_3G021780/CsaV3_3G035920/CsaV3_4G037690/CsaV3_5G002770/CsaV3_5G029170/CsaV3_5G034810/CsaV3_5G036470/CsaV3_6G040330/CsaV3_6G040390/CsaV3_6G040430/CsaV3_6G048680/CsaV3_6G049050/CsaV3_7G022930	CsaV3_1G003090/CsaV3_1G005960/CsaV3_1G035920/CsaV3_2G001570/CsaV3_2G013320/CsaV3_2G030420/CsaV3_3G007840/CsaV3_3G010470/CsaV3_3G021780/CsaV3_3G035920/CsaV3_4G037690/CsaV3_5G002770/CsaV3_5G029170/CsaV3_5G034810/CsaV3_5G036470/CsaV3_6G040330/CsaV3_6G040390/CsaV3_6G040430/CsaV3_6G048680/CsaV3_6G049050/CsaV3_7G022930	21
BP	GO:0007275	multicellular organism development	100291	21/6278	0.449122	0.834988	CsaV3_2G024750/CsaV3_3G001850/CsaV3_3G019890/CsaV3_3G019900/CsaV3_3G038880/CsaV3_4G030630/CsaV3_6G007200/CsaV3_6G042260	CsaV3_2G024750/CsaV3_3G001850/CsaV3_3G019890/CsaV3_3G019900/CsaV3_3G038880/CsaV3_4G030630/CsaV3_6G007200/CsaV3_6G042260	8
BP	GO:0032502	developmental process	100291	21/6278	0.449122	0.834988	CsaV3_2G024750/CsaV3_3G001850/CsaV3_3G019890/CsaV3_3G019900/CsaV3_3G038880/CsaV3_4G030630/CsaV3_6G007200/CsaV3_6G042260	CsaV3_2G024750/CsaV3_3G001850/CsaV3_3G019890/CsaV3_3G019900/CsaV3_3G038880/CsaV3_4G030630/CsaV3_6G007200/CsaV3_6G042260	8
BP	GO:0048856	anatomical structure development	100291	21/6278	0.449122	0.834988	CsaV3_2G024750/CsaV3_3G001850/CsaV3_3G019890/CsaV3_3G019900/CsaV3_3G038880/CsaV3_4G030630/CsaV3_6G007200/CsaV3_6G042260	CsaV3_2G024750/CsaV3_3G001850/CsaV3_3G019890/CsaV3_3G019900/CsaV3_3G038880/CsaV3_4G030630/CsaV3_6G007200/CsaV3_6G042260	8
BP	GO:0090407	organophosphate biosynthetic process	36/2174	101/6278	0.451871	0.834988	CsaV3_1G003090/CsaV3_1G005960/CsaV3_1G008930/CsaV3_1G010170/CsaV3_1G016970/CsaV3_1G035920/CsaV3_1G042920/CsaV3_2G001570/CsaV3_2G013320/CsaV3_2G030420/CsaV3_3G007170/CsaV3_3G007840/CsaV3_3G010470/CsaV3_3G021780/CsaV3_3G035920/CsaV3_4G022060/CsaV3_4G037690/CsaV3_5G002770/CsaV3_5G028680/CsaV3_5G029170/CsaV3_5G033710/CsaV3_5G034810/CsaV3_5G036470/CsaV3_6G040330/CsaV3_6G040390/CsaV3_6G040430/CsaV3_6G0…	CsaV3_1G003090/CsaV3_1G005960/CsaV3_1G008930/CsaV3_1G010170/CsaV3_1G016970/CsaV3_1G035920/CsaV3_1G042920/CsaV3_2G001570/CsaV3_2G013320/CsaV3_2G030420/CsaV3_3G007170/CsaV3_3G007840/CsaV3_3G010470/CsaV3_3G021780/CsaV3_3G035920/CsaV3_4G022060/CsaV3_4G037690/CsaV3_5G002770/CsaV3_5G028680/CsaV3_5G029170/CsaV3_5G033710/CsaV3_5G034810/CsaV3_5G036470/CsaV3_6G040330/CsaV3_6G040390/CsaV3_6G040430/CsaV3_6G0…	36
BP	GO:0009100	glycoprotein metabolic process	15/2174	41/6278	0.453841	0.834988	CsaV3_1G008060/CsaV3_1G010720/CsaV3_1G022990/CsaV3_1G024100/CsaV3_2G014400/CsaV3_3G019150/CsaV3_5G001510/CsaV3_5G027050/CsaV3_5G031040/CsaV3_5G032120/CsaV3_5G032750/CsaV3_5G035760/CsaV3_5G036240/CsaV3_6G031390/CsaV3_7G008560	CsaV3_1G008060/CsaV3_1G010720/CsaV3_1G022990/CsaV3_1G024100/CsaV3_2G014400/CsaV3_3G019150/CsaV3_5G001510/CsaV3_5G027050/CsaV3_5G031040/CsaV3_5G032120/CsaV3_5G032750/CsaV3_5G035760/CsaV3_5G036240/CsaV3_6G031390/CsaV3_7G008560	15
BP	GO:0009101	glycoprotein biosynthetic process	15/2174	41/6278	0.453841	0.834988	CsaV3_1G008060/CsaV3_1G010720/CsaV3_1G022990/CsaV3_1G024100/CsaV3_2G014400/CsaV3_3G019150/CsaV3_5G001510/CsaV3_5G027050/CsaV3_5G031040/CsaV3_5G032120/CsaV3_5G032750/CsaV3_5G035760/CsaV3_5G036240/CsaV3_6G031390/CsaV3_7G008560	CsaV3_1G008060/CsaV3_1G010720/CsaV3_1G022990/CsaV3_1G024100/CsaV3_2G014400/CsaV3_3G019150/CsaV3_5G001510/CsaV3_5G027050/CsaV3_5G031040/CsaV3_5G032120/CsaV3_5G032750/CsaV3_5G035760/CsaV3_5G036240/CsaV3_6G031390/CsaV3_7G008560	15
BP	GO:0015698	inorganic anion transport	100352	27/6278	0.467503	0.85367	CsaV3_3G006610/CsaV3_3G012960/CsaV3_4G028730/CsaV3_5G000350/CsaV3_6G038240/CsaV3_6G043870/CsaV3_6G052220/CsaV3_7G027830/CsaV3_7G032820/CsaV3_7G033120	CsaV3_3G006610/CsaV3_3G012960/CsaV3_4G028730/CsaV3_5G000350/CsaV3_6G038240/CsaV3_6G043870/CsaV3_6G052220/CsaV3_7G027830/CsaV3_7G032820/CsaV3_7G033120	10
BP	GO:0006163	purine nucleotide metabolic process	26/2174	73/6278	0.47328	0.85367	CsaV3_1G003090/CsaV3_1G005960/CsaV3_1G010170/CsaV3_1G035920/CsaV3_2G001570/CsaV3_2G013320/CsaV3_2G030420/CsaV3_3G007170/CsaV3_3G007840/CsaV3_3G010470/CsaV3_3G015600/CsaV3_3G021780/CsaV3_3G035920/CsaV3_4G000980/CsaV3_4G008710/CsaV3_4G037690/CsaV3_5G002770/CsaV3_5G029170/CsaV3_5G034810/CsaV3_5G036470/CsaV3_6G040330/CsaV3_6G040390/CsaV3_6G040430/CsaV3_6G048680/CsaV3_6G049050/CsaV3_7G022930	CsaV3_1G003090/CsaV3_1G005960/CsaV3_1G010170/CsaV3_1G035920/CsaV3_2G001570/CsaV3_2G013320/CsaV3_2G030420/CsaV3_3G007170/CsaV3_3G007840/CsaV3_3G010470/CsaV3_3G015600/CsaV3_3G021780/CsaV3_3G035920/CsaV3_4G000980/CsaV3_4G008710/CsaV3_4G037690/CsaV3_5G002770/CsaV3_5G029170/CsaV3_5G034810/CsaV3_5G036470/CsaV3_6G040330/CsaV3_6G040390/CsaV3_6G040430/CsaV3_6G048680/CsaV3_6G049050/CsaV3_7G022930	26
BP	GO:0000041	transition metal ion transport	100169	1599307	0.476106	0.85367	CsaV3_3G034410/CsaV3_4G025720/CsaV3_4G026660/CsaV3_6G031870	CsaV3_3G034410/CsaV3_4G025720/CsaV3_4G026660/CsaV3_6G031870	4
BP	GO:0006074	(1->3)-beta-D-glucan metabolic process	100169	1599307	0.476106	0.85367	CsaV3_1G042280/CsaV3_1G042290/CsaV3_2G018300/CsaV3_7G031450	CsaV3_1G042280/CsaV3_1G042290/CsaV3_2G018300/CsaV3_7G031450	4
BP	GO:0006075	(1->3)-beta-D-glucan biosynthetic process	100169	1599307	0.476106	0.85367	CsaV3_1G042280/CsaV3_1G042290/CsaV3_2G018300/CsaV3_7G031450	CsaV3_1G042280/CsaV3_1G042290/CsaV3_2G018300/CsaV3_7G031450	4
BP	GO:0030243	cellulose metabolic process	100413	33/6278	0.481907	0.85367	CsaV3_1G003390/CsaV3_2G034720/CsaV3_2G036170/CsaV3_3G046510/CsaV3_4G001040/CsaV3_4G006800/CsaV3_4G011810/CsaV3_6G002560/CsaV3_6G033720/CsaV3_7G011470/CsaV3_7G011490/CsaV3_7G031050	CsaV3_1G003390/CsaV3_2G034720/CsaV3_2G036170/CsaV3_3G046510/CsaV3_4G001040/CsaV3_4G006800/CsaV3_4G011810/CsaV3_6G002560/CsaV3_6G033720/CsaV3_7G011470/CsaV3_7G011490/CsaV3_7G031050	12
BP	GO:0030244	cellulose biosynthetic process	100413	33/6278	0.481907	0.85367	CsaV3_1G003390/CsaV3_2G034720/CsaV3_2G036170/CsaV3_3G046510/CsaV3_4G001040/CsaV3_4G006800/CsaV3_4G011810/CsaV3_6G002560/CsaV3_6G033720/CsaV3_7G011470/CsaV3_7G011490/CsaV3_7G031050	CsaV3_1G003390/CsaV3_2G034720/CsaV3_2G036170/CsaV3_3G046510/CsaV3_4G001040/CsaV3_4G006800/CsaV3_4G011810/CsaV3_6G002560/CsaV3_6G033720/CsaV3_7G011470/CsaV3_7G011490/CsaV3_7G031050	12
BP	GO:0009108	coenzyme biosynthetic process	20/2174	56/6278	0.482181	0.85367	CsaV3_1G003090/CsaV3_1G008930/CsaV3_1G035920/CsaV3_1G042920/CsaV3_2G013320/CsaV3_2G030420/CsaV3_3G009100/CsaV3_3G021780/CsaV3_3G035920/CsaV3_4G013530/CsaV3_4G037690/CsaV3_5G004930/CsaV3_5G008630/CsaV3_5G029170/CsaV3_6G040330/CsaV3_6G040390/CsaV3_6G040430/CsaV3_6G048680/CsaV3_7G022930/CsaV3_7G029140	CsaV3_1G003090/CsaV3_1G008930/CsaV3_1G035920/CsaV3_1G042920/CsaV3_2G013320/CsaV3_2G030420/CsaV3_3G009100/CsaV3_3G021780/CsaV3_3G035920/CsaV3_4G013530/CsaV3_4G037690/CsaV3_5G004930/CsaV3_5G008630/CsaV3_5G029170/CsaV3_6G040330/CsaV3_6G040390/CsaV3_6G040430/CsaV3_6G048680/CsaV3_7G022930/CsaV3_7G029140	20
BP	GO:0009892	negative regulation of metabolic process	100199	13/6278	0.488098	0.85367	CsaV3_2G003690/CsaV3_5G008130/CsaV3_6G003670/CsaV3_6G014380/CsaV3_7G030200	CsaV3_2G003690/CsaV3_5G008130/CsaV3_6G003670/CsaV3_6G014380/CsaV3_7G030200	5
BP	GO:0010605	negative regulation of macromolecule metabolic process	100199	13/6278	0.488098	0.85367	CsaV3_2G003690/CsaV3_5G008130/CsaV3_6G003670/CsaV3_6G014380/CsaV3_7G030200	CsaV3_2G003690/CsaV3_5G008130/CsaV3_6G003670/CsaV3_6G014380/CsaV3_7G030200	5
BP	GO:0032268	regulation of cellular protein metabolic process	100199	13/6278	0.488098	0.85367	CsaV3_1G028950/CsaV3_2G005220/CsaV3_5G033100/CsaV3_6G003670/CsaV3_7G028110	CsaV3_1G028950/CsaV3_2G005220/CsaV3_5G033100/CsaV3_6G003670/CsaV3_7G028110	5
BP	GO:0051130	positive regulation of cellular component organization	100199	13/6278	0.488098	0.85367	CsaV3_1G028950/CsaV3_1G043050/CsaV3_3G003930/CsaV3_4G031280/CsaV3_5G033100	CsaV3_1G028950/CsaV3_1G043050/CsaV3_3G003930/CsaV3_4G031280/CsaV3_5G033100	5
BP	GO:1901137	carbohydrate derivative biosynthetic process	39/2174	111/6278	0.491043	0.853829	CsaV3_1G003090/CsaV3_1G005960/CsaV3_1G008060/CsaV3_1G010720/CsaV3_1G022990/CsaV3_1G024100/CsaV3_1G035920/CsaV3_2G001570/CsaV3_2G013320/CsaV3_2G014400/CsaV3_2G030420/CsaV3_3G007170/CsaV3_3G007840/CsaV3_3G010470/CsaV3_3G019150/CsaV3_3G021780/CsaV3_3G035920/CsaV3_4G022060/CsaV3_4G037690/CsaV3_5G001510/CsaV3_5G002770/CsaV3_5G014110/CsaV3_5G027050/CsaV3_5G029170/CsaV3_5G031040/CsaV3_5G032120/CsaV3_5G0…	CsaV3_1G003090/CsaV3_1G005960/CsaV3_1G008060/CsaV3_1G010720/CsaV3_1G022990/CsaV3_1G024100/CsaV3_1G035920/CsaV3_2G001570/CsaV3_2G013320/CsaV3_2G014400/CsaV3_2G030420/CsaV3_3G007170/CsaV3_3G007840/CsaV3_3G010470/CsaV3_3G019150/CsaV3_3G021780/CsaV3_3G035920/CsaV3_4G022060/CsaV3_4G037690/CsaV3_5G001510/CsaV3_5G002770/CsaV3_5G014110/CsaV3_5G027050/CsaV3_5G029170/CsaV3_5G031040/CsaV3_5G032120/CsaV3_5G0…	39
BP	GO:0071705	nitrogen compound transport	48/2174	137/6278	0.492207	0.853829	CsaV3_1G006710/CsaV3_1G014870/CsaV3_1G023100/CsaV3_1G036760/CsaV3_2G007560/CsaV3_2G012160/CsaV3_2G012420/CsaV3_2G013670/CsaV3_2G014650/CsaV3_2G015150/CsaV3_2G031010/CsaV3_3G033250/CsaV3_3G033490/CsaV3_3G041240/CsaV3_3G047380/CsaV3_3G048660/CsaV3_4G006230/CsaV3_4G007780/CsaV3_4G011960/CsaV3_4G026140/CsaV3_5G029500/CsaV3_5G030580/CsaV3_5G033300/CsaV3_5G033310/CsaV3_5G033760/CsaV3_5G034670/CsaV3_5G0…	CsaV3_1G006710/CsaV3_1G014870/CsaV3_1G023100/CsaV3_1G036760/CsaV3_2G007560/CsaV3_2G012160/CsaV3_2G012420/CsaV3_2G013670/CsaV3_2G014650/CsaV3_2G015150/CsaV3_2G031010/CsaV3_3G033250/CsaV3_3G033490/CsaV3_3G041240/CsaV3_3G047380/CsaV3_3G048660/CsaV3_4G006230/CsaV3_4G007780/CsaV3_4G011960/CsaV3_4G026140/CsaV3_5G029500/CsaV3_5G030580/CsaV3_5G033300/CsaV3_5G033310/CsaV3_5G033760/CsaV3_5G034670/CsaV3_5G0…	48
BP	GO:0048518	positive regulation of biological process	100230	16/6278	0.497456	0.859427	CsaV3_1G028950/CsaV3_1G043050/CsaV3_3G003930/CsaV3_3G028740/CsaV3_4G031280/CsaV3_5G033100	CsaV3_1G028950/CsaV3_1G043050/CsaV3_3G003930/CsaV3_3G028740/CsaV3_4G031280/CsaV3_5G033100	6
BP	GO:0009150	purine ribonucleotide metabolic process	25/2174	71/6278	0.5036	0.863024	CsaV3_1G003090/CsaV3_1G005960/CsaV3_1G035920/CsaV3_2G001570/CsaV3_2G013320/CsaV3_2G030420/CsaV3_3G007170/CsaV3_3G007840/CsaV3_3G010470/CsaV3_3G015600/CsaV3_3G021780/CsaV3_3G035920/CsaV3_4G000980/CsaV3_4G008710/CsaV3_4G037690/CsaV3_5G002770/CsaV3_5G029170/CsaV3_5G034810/CsaV3_5G036470/CsaV3_6G040330/CsaV3_6G040390/CsaV3_6G040430/CsaV3_6G048680/CsaV3_6G049050/CsaV3_7G022930	CsaV3_1G003090/CsaV3_1G005960/CsaV3_1G035920/CsaV3_2G001570/CsaV3_2G013320/CsaV3_2G030420/CsaV3_3G007170/CsaV3_3G007840/CsaV3_3G010470/CsaV3_3G015600/CsaV3_3G021780/CsaV3_3G035920/CsaV3_4G000980/CsaV3_4G008710/CsaV3_4G037690/CsaV3_5G002770/CsaV3_5G029170/CsaV3_5G034810/CsaV3_5G036470/CsaV3_6G040330/CsaV3_6G040390/CsaV3_6G040430/CsaV3_6G048680/CsaV3_6G049050/CsaV3_7G022930	25
BP	GO:0009259	ribonucleotide metabolic process	25/2174	71/6278	0.5036	0.863024	CsaV3_1G003090/CsaV3_1G005960/CsaV3_1G035920/CsaV3_2G001570/CsaV3_2G013320/CsaV3_2G030420/CsaV3_3G007170/CsaV3_3G007840/CsaV3_3G010470/CsaV3_3G015600/CsaV3_3G021780/CsaV3_3G035920/CsaV3_4G000980/CsaV3_4G008710/CsaV3_4G037690/CsaV3_5G002770/CsaV3_5G029170/CsaV3_5G034810/CsaV3_5G036470/CsaV3_6G040330/CsaV3_6G040390/CsaV3_6G040430/CsaV3_6G048680/CsaV3_6G049050/CsaV3_7G022930	CsaV3_1G003090/CsaV3_1G005960/CsaV3_1G035920/CsaV3_2G001570/CsaV3_2G013320/CsaV3_2G030420/CsaV3_3G007170/CsaV3_3G007840/CsaV3_3G010470/CsaV3_3G015600/CsaV3_3G021780/CsaV3_3G035920/CsaV3_4G000980/CsaV3_4G008710/CsaV3_4G037690/CsaV3_5G002770/CsaV3_5G029170/CsaV3_5G034810/CsaV3_5G036470/CsaV3_6G040330/CsaV3_6G040390/CsaV3_6G040430/CsaV3_6G048680/CsaV3_6G049050/CsaV3_7G022930	25
BP	GO:0072521	purine-containing compound metabolic process	26/2174	74/6278	0.507342	0.865944	CsaV3_1G003090/CsaV3_1G005960/CsaV3_1G010170/CsaV3_1G035920/CsaV3_2G001570/CsaV3_2G013320/CsaV3_2G030420/CsaV3_3G007170/CsaV3_3G007840/CsaV3_3G010470/CsaV3_3G015600/CsaV3_3G021780/CsaV3_3G035920/CsaV3_4G000980/CsaV3_4G008710/CsaV3_4G037690/CsaV3_5G002770/CsaV3_5G029170/CsaV3_5G034810/CsaV3_5G036470/CsaV3_6G040330/CsaV3_6G040390/CsaV3_6G040430/CsaV3_6G048680/CsaV3_6G049050/CsaV3_7G022930	CsaV3_1G003090/CsaV3_1G005960/CsaV3_1G010170/CsaV3_1G035920/CsaV3_2G001570/CsaV3_2G013320/CsaV3_2G030420/CsaV3_3G007170/CsaV3_3G007840/CsaV3_3G010470/CsaV3_3G015600/CsaV3_3G021780/CsaV3_3G035920/CsaV3_4G000980/CsaV3_4G008710/CsaV3_4G037690/CsaV3_5G002770/CsaV3_5G029170/CsaV3_5G034810/CsaV3_5G036470/CsaV3_6G040330/CsaV3_6G040390/CsaV3_6G040430/CsaV3_6G048680/CsaV3_6G049050/CsaV3_7G022930	26
BP	GO:0009308	amine metabolic process	100352	28/6278	0.522861	0.888863	CsaV3_1G003170/CsaV3_1G031480/CsaV3_2G007750/CsaV3_3G020560/CsaV3_5G003790/CsaV3_5G003800/CsaV3_6G005510/CsaV3_6G038140/CsaV3_6G038150/CsaV3_7G008280	CsaV3_1G003170/CsaV3_1G031480/CsaV3_2G007750/CsaV3_3G020560/CsaV3_5G003790/CsaV3_5G003800/CsaV3_6G005510/CsaV3_6G038140/CsaV3_6G038150/CsaV3_7G008280	10
BP	GO:0006511	ubiquitin-dependent protein catabolic process	100413	34/6278	0.531991	0.89366	CsaV3_1G046270/CsaV3_2G024370/CsaV3_2G028900/CsaV3_3G019890/CsaV3_3G019900/CsaV3_3G032680/CsaV3_3G041550/CsaV3_4G032560/CsaV3_5G034230/CsaV3_6G007200/CsaV3_6G047290/CsaV3_7G003400	CsaV3_1G046270/CsaV3_2G024370/CsaV3_2G028900/CsaV3_3G019890/CsaV3_3G019900/CsaV3_3G032680/CsaV3_3G041550/CsaV3_4G032560/CsaV3_5G034230/CsaV3_6G007200/CsaV3_6G047290/CsaV3_7G003400	12
BP	GO:0019941	modification-dependent protein catabolic process	100413	34/6278	0.531991	0.89366	CsaV3_1G046270/CsaV3_2G024370/CsaV3_2G028900/CsaV3_3G019890/CsaV3_3G019900/CsaV3_3G032680/CsaV3_3G041550/CsaV3_4G032560/CsaV3_5G034230/CsaV3_6G007200/CsaV3_6G047290/CsaV3_7G003400	CsaV3_1G046270/CsaV3_2G024370/CsaV3_2G028900/CsaV3_3G019890/CsaV3_3G019900/CsaV3_3G032680/CsaV3_3G041550/CsaV3_4G032560/CsaV3_5G034230/CsaV3_6G007200/CsaV3_6G047290/CsaV3_7G003400	12
BP	GO:0043632	modification-dependent macromolecule catabolic process	100413	34/6278	0.531991	0.89366	CsaV3_1G046270/CsaV3_2G024370/CsaV3_2G028900/CsaV3_3G019890/CsaV3_3G019900/CsaV3_3G032680/CsaV3_3G041550/CsaV3_4G032560/CsaV3_5G034230/CsaV3_6G007200/CsaV3_6G047290/CsaV3_7G003400	CsaV3_1G046270/CsaV3_2G024370/CsaV3_2G028900/CsaV3_3G019890/CsaV3_3G019900/CsaV3_3G032680/CsaV3_3G041550/CsaV3_4G032560/CsaV3_5G034230/CsaV3_6G007200/CsaV3_6G047290/CsaV3_7G003400	12
BP	GO:0016567	protein ubiquitination	15/2174	43/6278	0.543438	0.89696	CsaV3_1G008240/CsaV3_1G008380/CsaV3_1G034080/CsaV3_1G043840/CsaV3_1G043860/CsaV3_1G045780/CsaV3_2G025400/CsaV3_3G017250/CsaV3_3G018440/CsaV3_3G021120/CsaV3_5G031630/CsaV3_5G033570/CsaV3_6G000580/CsaV3_6G010170/CsaV3_6G041810	CsaV3_1G008240/CsaV3_1G008380/CsaV3_1G034080/CsaV3_1G043840/CsaV3_1G043860/CsaV3_1G045780/CsaV3_2G025400/CsaV3_3G017250/CsaV3_3G018440/CsaV3_3G021120/CsaV3_5G031630/CsaV3_5G033570/CsaV3_6G000580/CsaV3_6G010170/CsaV3_6G041810	15
BP	GO:0015031	protein transport	38/2174	110/6278	0.543652	0.89696	CsaV3_1G006710/CsaV3_1G014870/CsaV3_1G023100/CsaV3_1G036760/CsaV3_2G007560/CsaV3_2G012420/CsaV3_2G013670/CsaV3_2G014650/CsaV3_2G015150/CsaV3_2G031010/CsaV3_3G033250/CsaV3_3G041240/CsaV3_3G047380/CsaV3_3G048660/CsaV3_4G006230/CsaV3_4G026140/CsaV3_5G029500/CsaV3_5G030580/CsaV3_5G033760/CsaV3_5G038260/CsaV3_6G001890/CsaV3_6G002880/CsaV3_6G003390/CsaV3_6G004490/CsaV3_6G006390/CsaV3_6G013060/CsaV3_6G0…	CsaV3_1G006710/CsaV3_1G014870/CsaV3_1G023100/CsaV3_1G036760/CsaV3_2G007560/CsaV3_2G012420/CsaV3_2G013670/CsaV3_2G014650/CsaV3_2G015150/CsaV3_2G031010/CsaV3_3G033250/CsaV3_3G041240/CsaV3_3G047380/CsaV3_3G048660/CsaV3_4G006230/CsaV3_4G026140/CsaV3_5G029500/CsaV3_5G030580/CsaV3_5G033760/CsaV3_5G038260/CsaV3_6G001890/CsaV3_6G002880/CsaV3_6G003390/CsaV3_6G004490/CsaV3_6G006390/CsaV3_6G013060/CsaV3_6G0…	38
BP	GO:0015833	peptide transport	38/2174	110/6278	0.543652	0.89696	CsaV3_1G006710/CsaV3_1G014870/CsaV3_1G023100/CsaV3_1G036760/CsaV3_2G007560/CsaV3_2G012420/CsaV3_2G013670/CsaV3_2G014650/CsaV3_2G015150/CsaV3_2G031010/CsaV3_3G033250/CsaV3_3G041240/CsaV3_3G047380/CsaV3_3G048660/CsaV3_4G006230/CsaV3_4G026140/CsaV3_5G029500/CsaV3_5G030580/CsaV3_5G033760/CsaV3_5G038260/CsaV3_6G001890/CsaV3_6G002880/CsaV3_6G003390/CsaV3_6G004490/CsaV3_6G006390/CsaV3_6G013060/CsaV3_6G0…	CsaV3_1G006710/CsaV3_1G014870/CsaV3_1G023100/CsaV3_1G036760/CsaV3_2G007560/CsaV3_2G012420/CsaV3_2G013670/CsaV3_2G014650/CsaV3_2G015150/CsaV3_2G031010/CsaV3_3G033250/CsaV3_3G041240/CsaV3_3G047380/CsaV3_3G048660/CsaV3_4G006230/CsaV3_4G026140/CsaV3_5G029500/CsaV3_5G030580/CsaV3_5G033760/CsaV3_5G038260/CsaV3_6G001890/CsaV3_6G002880/CsaV3_6G003390/CsaV3_6G004490/CsaV3_6G006390/CsaV3_6G013060/CsaV3_6G0…	38
BP	GO:0042886	amide transport	38/2174	110/6278	0.543652	0.89696	CsaV3_1G006710/CsaV3_1G014870/CsaV3_1G023100/CsaV3_1G036760/CsaV3_2G007560/CsaV3_2G012420/CsaV3_2G013670/CsaV3_2G014650/CsaV3_2G015150/CsaV3_2G031010/CsaV3_3G033250/CsaV3_3G041240/CsaV3_3G047380/CsaV3_3G048660/CsaV3_4G006230/CsaV3_4G026140/CsaV3_5G029500/CsaV3_5G030580/CsaV3_5G033760/CsaV3_5G038260/CsaV3_6G001890/CsaV3_6G002880/CsaV3_6G003390/CsaV3_6G004490/CsaV3_6G006390/CsaV3_6G013060/CsaV3_6G0…	CsaV3_1G006710/CsaV3_1G014870/CsaV3_1G023100/CsaV3_1G036760/CsaV3_2G007560/CsaV3_2G012420/CsaV3_2G013670/CsaV3_2G014650/CsaV3_2G015150/CsaV3_2G031010/CsaV3_3G033250/CsaV3_3G041240/CsaV3_3G047380/CsaV3_3G048660/CsaV3_4G006230/CsaV3_4G026140/CsaV3_5G029500/CsaV3_5G030580/CsaV3_5G033760/CsaV3_5G038260/CsaV3_6G001890/CsaV3_6G002880/CsaV3_6G003390/CsaV3_6G004490/CsaV3_6G006390/CsaV3_6G013060/CsaV3_6G0…	38
BP	GO:0044255	cellular lipid metabolic process	44/2174	128/6278	0.557917	0.89696	CsaV3_1G030920/CsaV3_1G044800/CsaV3_2G001370/CsaV3_2G011410/CsaV3_2G028690/CsaV3_3G003250/CsaV3_3G003490/CsaV3_3G006740/CsaV3_3G006930/CsaV3_3G008320/CsaV3_3G010300/CsaV3_3G016490/CsaV3_3G017450/CsaV3_3G019500/CsaV3_3G036240/CsaV3_4G022060/CsaV3_4G022080/CsaV3_4G028490/CsaV3_4G028790/CsaV3_5G002520/CsaV3_5G003990/CsaV3_5G013590/CsaV3_5G014080/CsaV3_5G023610/CsaV3_5G024510/CsaV3_5G028680/CsaV3_5G0…	CsaV3_1G030920/CsaV3_1G044800/CsaV3_2G001370/CsaV3_2G011410/CsaV3_2G028690/CsaV3_3G003250/CsaV3_3G003490/CsaV3_3G006740/CsaV3_3G006930/CsaV3_3G008320/CsaV3_3G010300/CsaV3_3G016490/CsaV3_3G017450/CsaV3_3G019500/CsaV3_3G036240/CsaV3_4G022060/CsaV3_4G022080/CsaV3_4G028490/CsaV3_4G028790/CsaV3_5G002520/CsaV3_5G003990/CsaV3_5G013590/CsaV3_5G014080/CsaV3_5G023610/CsaV3_5G024510/CsaV3_5G028680/CsaV3_5G0…	44
BP	GO:0018205	peptidyl-lysine modification	100169	1599338	0.564215	0.89696	CsaV3_3G011580/CsaV3_3G027790/CsaV3_3G040650/CsaV3_6G007420	CsaV3_3G011580/CsaV3_3G027790/CsaV3_3G040650/CsaV3_6G007420	4
BP	GO:0042398	cellular modified amino acid biosynthetic process	100169	1599338	0.564215	0.89696	CsaV3_3G009100/CsaV3_4G013530/CsaV3_5G008630/CsaV3_5G028680	CsaV3_3G009100/CsaV3_4G013530/CsaV3_5G008630/CsaV3_5G028680	4
BP	GO:0043414	macromolecule methylation	100169	1599338	0.564215	0.89696	CsaV3_3G011580/CsaV3_3G027790/CsaV3_3G040650/CsaV3_6G007420	CsaV3_3G011580/CsaV3_3G027790/CsaV3_3G040650/CsaV3_6G007420	4
BP	GO:0006575	cellular modified amino acid metabolic process	100199	14/6278	0.565805	0.89696	CsaV3_2G001680/CsaV3_3G009100/CsaV3_4G013530/CsaV3_5G008630/CsaV3_5G028680	CsaV3_2G001680/CsaV3_3G009100/CsaV3_4G013530/CsaV3_5G008630/CsaV3_5G028680	5
BP	GO:0033043	regulation of organelle organization	100199	14/6278	0.565805	0.89696	CsaV3_1G043050/CsaV3_2G006740/CsaV3_3G003930/CsaV3_4G031280/CsaV3_6G004830	CsaV3_1G043050/CsaV3_2G006740/CsaV3_3G003930/CsaV3_4G031280/CsaV3_6G004830	5
BP	GO:0006732	coenzyme metabolic process	23/2174	67/6278	0.566782	0.89696	CsaV3_1G003090/CsaV3_1G008930/CsaV3_1G035920/CsaV3_1G037750/CsaV3_1G042920/CsaV3_2G013320/CsaV3_2G030420/CsaV3_3G009100/CsaV3_3G021780/CsaV3_3G035920/CsaV3_4G006330/CsaV3_4G013530/CsaV3_4G037690/CsaV3_5G004930/CsaV3_5G008630/CsaV3_5G028490/CsaV3_5G029170/CsaV3_6G040330/CsaV3_6G040390/CsaV3_6G040430/CsaV3_6G048680/CsaV3_7G022930/CsaV3_7G029140	CsaV3_1G003090/CsaV3_1G008930/CsaV3_1G035920/CsaV3_1G037750/CsaV3_1G042920/CsaV3_2G013320/CsaV3_2G030420/CsaV3_3G009100/CsaV3_3G021780/CsaV3_3G035920/CsaV3_4G006330/CsaV3_4G013530/CsaV3_4G037690/CsaV3_5G004930/CsaV3_5G008630/CsaV3_5G028490/CsaV3_5G029170/CsaV3_6G040330/CsaV3_6G040390/CsaV3_6G040430/CsaV3_6G048680/CsaV3_7G022930/CsaV3_7G029140	23
BP	GO:0015985	energy coupled proton transport, down electrochemical gradient	100230	17/6278	0.567723	0.89696	CsaV3_1G005960/CsaV3_2G001570/CsaV3_3G007840/CsaV3_3G010470/CsaV3_5G036470/CsaV3_6G049050	CsaV3_1G005960/CsaV3_2G001570/CsaV3_3G007840/CsaV3_3G010470/CsaV3_5G036470/CsaV3_6G049050	6
BP	GO:0015986	ATP synthesis coupled proton transport	100230	17/6278	0.567723	0.89696	CsaV3_1G005960/CsaV3_2G001570/CsaV3_3G007840/CsaV3_3G010470/CsaV3_5G036470/CsaV3_6G049050	CsaV3_1G005960/CsaV3_2G001570/CsaV3_3G007840/CsaV3_3G010470/CsaV3_5G036470/CsaV3_6G049050	6
BP	GO:0072594	establishment of protein localization to organelle	100230	17/6278	0.567723	0.89696	CsaV3_1G036760/CsaV3_2G007560/CsaV3_2G013670/CsaV3_5G030580/CsaV3_6G004490/CsaV3_6G040720	CsaV3_1G036760/CsaV3_2G007560/CsaV3_2G013670/CsaV3_5G030580/CsaV3_6G004490/CsaV3_6G040720	6
BP	GO:0072657	protein localization to membrane	100230	17/6278	0.567723	0.89696	CsaV3_1G034030/CsaV3_1G036760/CsaV3_2G007560/CsaV3_2G013670/CsaV3_5G030580/CsaV3_6G040720	CsaV3_1G034030/CsaV3_1G036760/CsaV3_2G007560/CsaV3_2G013670/CsaV3_5G030580/CsaV3_6G040720	6
BP	GO:0090150	establishment of protein localization to membrane	100230	17/6278	0.567723	0.89696	CsaV3_1G034030/CsaV3_1G036760/CsaV3_2G007560/CsaV3_2G013670/CsaV3_5G030580/CsaV3_6G040720	CsaV3_1G034030/CsaV3_1G036760/CsaV3_2G007560/CsaV3_2G013670/CsaV3_5G030580/CsaV3_6G040720	6
BP	GO:0048519	negative regulation of biological process	100291	23/6278	0.571916	0.900238	CsaV3_2G003690/CsaV3_2G006740/CsaV3_5G008130/CsaV3_6G003670/CsaV3_6G004830/CsaV3_6G014380/CsaV3_7G008680/CsaV3_7G030200	CsaV3_2G003690/CsaV3_2G006740/CsaV3_5G008130/CsaV3_6G003670/CsaV3_6G004830/CsaV3_6G014380/CsaV3_7G008680/CsaV3_7G030200	8
BP	GO:0032787	monocarboxylic acid metabolic process	30/2174	88/6278	0.58264	0.909622	CsaV3_1G003090/CsaV3_1G009520/CsaV3_1G030920/CsaV3_1G035920/CsaV3_2G013320/CsaV3_2G028690/CsaV3_2G030420/CsaV3_3G003250/CsaV3_3G010300/CsaV3_3G016490/CsaV3_3G017450/CsaV3_3G019500/CsaV3_3G021780/CsaV3_3G035920/CsaV3_4G028790/CsaV3_4G037690/CsaV3_5G002520/CsaV3_5G003990/CsaV3_5G023610/CsaV3_5G029170/CsaV3_6G016090/CsaV3_6G022310/CsaV3_6G030990/CsaV3_6G040330/CsaV3_6G040390/CsaV3_6G040430/CsaV3_6G0…	CsaV3_1G003090/CsaV3_1G009520/CsaV3_1G030920/CsaV3_1G035920/CsaV3_2G013320/CsaV3_2G028690/CsaV3_2G030420/CsaV3_3G003250/CsaV3_3G010300/CsaV3_3G016490/CsaV3_3G017450/CsaV3_3G019500/CsaV3_3G021780/CsaV3_3G035920/CsaV3_4G028790/CsaV3_4G037690/CsaV3_5G002520/CsaV3_5G003990/CsaV3_5G023610/CsaV3_5G029170/CsaV3_6G016090/CsaV3_6G022310/CsaV3_6G030990/CsaV3_6G040330/CsaV3_6G040390/CsaV3_6G040430/CsaV3_6G0…	30
BP	GO:0034613	cellular protein localization	31/2174	91/6278	0.584686	0.909622	CsaV3_1G006710/CsaV3_1G014870/CsaV3_1G023100/CsaV3_1G034030/CsaV3_1G036760/CsaV3_2G007560/CsaV3_2G012420/CsaV3_2G013670/CsaV3_2G014650/CsaV3_2G015150/CsaV3_2G031010/CsaV3_3G033250/CsaV3_3G041240/CsaV3_3G047380/CsaV3_3G048660/CsaV3_4G026140/CsaV3_5G030580/CsaV3_5G033760/CsaV3_5G038260/CsaV3_6G001890/CsaV3_6G004490/CsaV3_6G006390/CsaV3_6G014610/CsaV3_6G040720/CsaV3_6G048860/CsaV3_6G050000/CsaV3_7G0…	CsaV3_1G006710/CsaV3_1G014870/CsaV3_1G023100/CsaV3_1G034030/CsaV3_1G036760/CsaV3_2G007560/CsaV3_2G012420/CsaV3_2G013670/CsaV3_2G014650/CsaV3_2G015150/CsaV3_2G031010/CsaV3_3G033250/CsaV3_3G041240/CsaV3_3G047380/CsaV3_3G048660/CsaV3_4G026140/CsaV3_5G030580/CsaV3_5G033760/CsaV3_5G038260/CsaV3_6G001890/CsaV3_6G004490/CsaV3_6G006390/CsaV3_6G014610/CsaV3_6G040720/CsaV3_6G048860/CsaV3_6G050000/CsaV3_7G0…	31
BP	GO:0070727	cellular macromolecule localization	31/2174	91/6278	0.584686	0.909622	CsaV3_1G006710/CsaV3_1G014870/CsaV3_1G023100/CsaV3_1G034030/CsaV3_1G036760/CsaV3_2G007560/CsaV3_2G012420/CsaV3_2G013670/CsaV3_2G014650/CsaV3_2G015150/CsaV3_2G031010/CsaV3_3G033250/CsaV3_3G041240/CsaV3_3G047380/CsaV3_3G048660/CsaV3_4G026140/CsaV3_5G030580/CsaV3_5G033760/CsaV3_5G038260/CsaV3_6G001890/CsaV3_6G004490/CsaV3_6G006390/CsaV3_6G014610/CsaV3_6G040720/CsaV3_6G048860/CsaV3_6G050000/CsaV3_7G0…	CsaV3_1G006710/CsaV3_1G014870/CsaV3_1G023100/CsaV3_1G034030/CsaV3_1G036760/CsaV3_2G007560/CsaV3_2G012420/CsaV3_2G013670/CsaV3_2G014650/CsaV3_2G015150/CsaV3_2G031010/CsaV3_3G033250/CsaV3_3G041240/CsaV3_3G047380/CsaV3_3G048660/CsaV3_4G026140/CsaV3_5G030580/CsaV3_5G033760/CsaV3_5G038260/CsaV3_6G001890/CsaV3_6G004490/CsaV3_6G006390/CsaV3_6G014610/CsaV3_6G040720/CsaV3_6G048860/CsaV3_6G050000/CsaV3_7G0…	31
BP	GO:0032446	protein modification by small protein conjugation	15/2174	44/6278	0.586439	0.909622	CsaV3_1G008240/CsaV3_1G008380/CsaV3_1G034080/CsaV3_1G043840/CsaV3_1G043860/CsaV3_1G045780/CsaV3_2G025400/CsaV3_3G017250/CsaV3_3G018440/CsaV3_3G021120/CsaV3_5G031630/CsaV3_5G033570/CsaV3_6G000580/CsaV3_6G010170/CsaV3_6G041810	CsaV3_1G008240/CsaV3_1G008380/CsaV3_1G034080/CsaV3_1G043840/CsaV3_1G043860/CsaV3_1G045780/CsaV3_2G025400/CsaV3_3G017250/CsaV3_3G018440/CsaV3_3G021120/CsaV3_5G031630/CsaV3_5G033570/CsaV3_6G000580/CsaV3_6G010170/CsaV3_6G041810	15
BP	GO:0045184	establishment of protein localization	39/2174	115/6278	0.599637	0.926712	CsaV3_1G006710/CsaV3_1G014870/CsaV3_1G023100/CsaV3_1G034030/CsaV3_1G036760/CsaV3_2G007560/CsaV3_2G012420/CsaV3_2G013670/CsaV3_2G014650/CsaV3_2G015150/CsaV3_2G031010/CsaV3_3G033250/CsaV3_3G041240/CsaV3_3G047380/CsaV3_3G048660/CsaV3_4G006230/CsaV3_4G026140/CsaV3_5G029500/CsaV3_5G030580/CsaV3_5G033760/CsaV3_5G038260/CsaV3_6G001890/CsaV3_6G002880/CsaV3_6G003390/CsaV3_6G004490/CsaV3_6G006390/CsaV3_6G0…	CsaV3_1G006710/CsaV3_1G014870/CsaV3_1G023100/CsaV3_1G034030/CsaV3_1G036760/CsaV3_2G007560/CsaV3_2G012420/CsaV3_2G013670/CsaV3_2G014650/CsaV3_2G015150/CsaV3_2G031010/CsaV3_3G033250/CsaV3_3G041240/CsaV3_3G047380/CsaV3_3G048660/CsaV3_4G006230/CsaV3_4G026140/CsaV3_5G029500/CsaV3_5G030580/CsaV3_5G033760/CsaV3_5G038260/CsaV3_6G001890/CsaV3_6G002880/CsaV3_6G003390/CsaV3_6G004490/CsaV3_6G006390/CsaV3_6G0…	39
BP	GO:1901135	carbohydrate derivative metabolic process	55/2174	163/6278	0.62438	0.956125	CsaV3_1G003090/CsaV3_1G005960/CsaV3_1G008060/CsaV3_1G010720/CsaV3_1G022990/CsaV3_1G024100/CsaV3_1G035920/CsaV3_1G037750/CsaV3_1G041450/CsaV3_1G045800/CsaV3_2G001570/CsaV3_2G013320/CsaV3_2G014400/CsaV3_2G028630/CsaV3_2G030420/CsaV3_2G032170/CsaV3_3G002990/CsaV3_3G007170/CsaV3_3G007840/CsaV3_3G010470/CsaV3_3G015600/CsaV3_3G019150/CsaV3_3G021780/CsaV3_3G035920/CsaV3_4G000980/CsaV3_4G006330/CsaV3_4G0…	CsaV3_1G003090/CsaV3_1G005960/CsaV3_1G008060/CsaV3_1G010720/CsaV3_1G022990/CsaV3_1G024100/CsaV3_1G035920/CsaV3_1G037750/CsaV3_1G041450/CsaV3_1G045800/CsaV3_2G001570/CsaV3_2G013320/CsaV3_2G014400/CsaV3_2G028630/CsaV3_2G030420/CsaV3_2G032170/CsaV3_3G002990/CsaV3_3G007170/CsaV3_3G007840/CsaV3_3G010470/CsaV3_3G015600/CsaV3_3G019150/CsaV3_3G021780/CsaV3_3G035920/CsaV3_4G000980/CsaV3_4G006330/CsaV3_4G0…	55
BP	GO:0006364	rRNA processing	100260	21/6278	0.630123	0.956125	CsaV3_1G000640/CsaV3_2G014840/CsaV3_2G015360/CsaV3_3G017360/CsaV3_3G046940/CsaV3_5G005970/CsaV3_7G007700	CsaV3_1G000640/CsaV3_2G014840/CsaV3_2G015360/CsaV3_3G017360/CsaV3_3G046940/CsaV3_5G005970/CsaV3_7G007700	7
BP	GO:0016072	rRNA metabolic process	100260	21/6278	0.630123	0.956125	CsaV3_1G000640/CsaV3_2G014840/CsaV3_2G015360/CsaV3_3G017360/CsaV3_3G046940/CsaV3_5G005970/CsaV3_7G007700	CsaV3_1G000640/CsaV3_2G014840/CsaV3_2G015360/CsaV3_3G017360/CsaV3_3G046940/CsaV3_5G005970/CsaV3_7G007700	7
BP	GO:0044282	small molecule catabolic process	100230	18/6278	0.632798	0.956125	CsaV3_1G012640/CsaV3_2G001660/CsaV3_3G023420/CsaV3_4G013550/CsaV3_5G030450/CsaV3_7G008280	CsaV3_1G012640/CsaV3_2G001660/CsaV3_3G023420/CsaV3_4G013550/CsaV3_5G030450/CsaV3_7G008280	6
BP	GO:0006470	protein dephosphorylation	100199	15/6278	0.636925	0.956125	CsaV3_2G001720/CsaV3_4G025970/CsaV3_5G035770/CsaV3_6G018610/CsaV3_6G037850	CsaV3_2G001720/CsaV3_4G025970/CsaV3_5G035770/CsaV3_6G018610/CsaV3_6G037850	5
BP	GO:0016311	dephosphorylation	100199	15/6278	0.636925	0.956125	CsaV3_2G001720/CsaV3_4G025970/CsaV3_5G035770/CsaV3_6G018610/CsaV3_6G037850	CsaV3_2G001720/CsaV3_4G025970/CsaV3_5G035770/CsaV3_6G018610/CsaV3_6G037850	5
BP	GO:0071804	cellular potassium ion transport	100199	15/6278	0.636925	0.956125	CsaV3_1G010210/CsaV3_1G010220/CsaV3_1G036370/CsaV3_3G042200/CsaV3_5G010840	CsaV3_1G010210/CsaV3_1G010220/CsaV3_1G036370/CsaV3_3G042200/CsaV3_5G010840	5
BP	GO:0071805	potassium ion transmembrane transport	100199	15/6278	0.636925	0.956125	CsaV3_1G010210/CsaV3_1G010220/CsaV3_1G036370/CsaV3_3G042200/CsaV3_5G010840	CsaV3_1G010210/CsaV3_1G010220/CsaV3_1G036370/CsaV3_3G042200/CsaV3_5G010840	5
BP	GO:0010629	negative regulation of gene expression	100169	1599368	0.643416	0.956125	CsaV3_5G008130/CsaV3_6G003670/CsaV3_6G014380/CsaV3_7G030200	CsaV3_5G008130/CsaV3_6G003670/CsaV3_6G014380/CsaV3_7G030200	4
BP	GO:0016569	covalent chromatin modification	100169	1599368	0.643416	0.956125	CsaV3_3G011580/CsaV3_3G027790/CsaV3_3G040650/CsaV3_6G007420	CsaV3_3G011580/CsaV3_3G027790/CsaV3_3G040650/CsaV3_6G007420	4
BP	GO:0016570	histone modification	100169	1599368	0.643416	0.956125	CsaV3_3G011580/CsaV3_3G027790/CsaV3_3G040650/CsaV3_6G007420	CsaV3_3G011580/CsaV3_3G027790/CsaV3_3G040650/CsaV3_6G007420	4
BP	GO:0005975	carbohydrate metabolic process	151/2174	446/6278	0.656699	0.972107	CsaV3_1G001640/CsaV3_1G003090/CsaV3_1G003390/CsaV3_1G004410/CsaV3_1G004550/CsaV3_1G004890/CsaV3_1G005170/CsaV3_1G007040/CsaV3_1G008020/CsaV3_1G009520/CsaV3_1G010680/CsaV3_1G010960/CsaV3_1G014850/CsaV3_1G022900/CsaV3_1G028640/CsaV3_1G031420/CsaV3_1G031430/CsaV3_1G031460/CsaV3_1G031470/CsaV3_1G032200/CsaV3_1G032410/CsaV3_1G034270/CsaV3_1G035920/CsaV3_1G038970/CsaV3_1G039930/CsaV3_1G041400/CsaV3_1G0…	CsaV3_1G001640/CsaV3_1G003090/CsaV3_1G003390/CsaV3_1G004410/CsaV3_1G004550/CsaV3_1G004890/CsaV3_1G005170/CsaV3_1G007040/CsaV3_1G008020/CsaV3_1G009520/CsaV3_1G010680/CsaV3_1G010960/CsaV3_1G014850/CsaV3_1G022900/CsaV3_1G028640/CsaV3_1G031420/CsaV3_1G031430/CsaV3_1G031460/CsaV3_1G031470/CsaV3_1G032200/CsaV3_1G032410/CsaV3_1G034270/CsaV3_1G035920/CsaV3_1G038970/CsaV3_1G039930/CsaV3_1G041400/CsaV3_1G0…	151
BP	GO:0009056	catabolic process	47/2174	141/6278	0.658745	0.972107	CsaV3_1G003090/CsaV3_1G012640/CsaV3_1G035920/CsaV3_1G041450/CsaV3_1G043980/CsaV3_1G046270/CsaV3_2G001660/CsaV3_2G013320/CsaV3_2G013440/CsaV3_2G024370/CsaV3_2G028900/CsaV3_2G030420/CsaV3_2G031230/CsaV3_3G002150/CsaV3_3G011520/CsaV3_3G019890/CsaV3_3G019900/CsaV3_3G020970/CsaV3_3G021780/CsaV3_3G023420/CsaV3_3G032680/CsaV3_3G035920/CsaV3_3G041550/CsaV3_3G043520/CsaV3_4G013550/CsaV3_4G032560/CsaV3_4G0…	CsaV3_1G003090/CsaV3_1G012640/CsaV3_1G035920/CsaV3_1G041450/CsaV3_1G043980/CsaV3_1G046270/CsaV3_2G001660/CsaV3_2G013320/CsaV3_2G013440/CsaV3_2G024370/CsaV3_2G028900/CsaV3_2G030420/CsaV3_2G031230/CsaV3_3G002150/CsaV3_3G011520/CsaV3_3G019890/CsaV3_3G019900/CsaV3_3G020970/CsaV3_3G021780/CsaV3_3G023420/CsaV3_3G032680/CsaV3_3G035920/CsaV3_3G041550/CsaV3_3G043520/CsaV3_4G013550/CsaV3_4G032560/CsaV3_4G0…	47
BP	GO:0006820	anion transport	20/2174	61/6278	0.665468	0.977176	CsaV3_1G000720/CsaV3_1G008550/CsaV3_1G043750/CsaV3_3G006610/CsaV3_3G012960/CsaV3_3G031650/CsaV3_4G007780/CsaV3_4G011960/CsaV3_4G028730/CsaV3_5G000350/CsaV3_5G034670/CsaV3_6G004330/CsaV3_6G036380/CsaV3_6G038240/CsaV3_6G043870/CsaV3_6G052220/CsaV3_7G007920/CsaV3_7G027830/CsaV3_7G032820/CsaV3_7G033120	CsaV3_1G000720/CsaV3_1G008550/CsaV3_1G043750/CsaV3_3G006610/CsaV3_3G012960/CsaV3_3G031650/CsaV3_4G007780/CsaV3_4G011960/CsaV3_4G028730/CsaV3_5G000350/CsaV3_5G034670/CsaV3_6G004330/CsaV3_6G036380/CsaV3_6G038240/CsaV3_6G043870/CsaV3_6G052220/CsaV3_7G007920/CsaV3_7G027830/CsaV3_7G032820/CsaV3_7G033120	20
BP	GO:0015979	photosynthesis	15/2174	46/6278	0.666779	0.977176	CsaV3_1G011330/CsaV3_1G013070/CsaV3_1G040810/CsaV3_2G004030/CsaV3_2G010090/CsaV3_2G031600/CsaV3_3G004330/CsaV3_4G007600/CsaV3_5G026220/CsaV3_5G030320/CsaV3_5G030690/CsaV3_6G035930/CsaV3_7G004070/CsaV3_7G004300/CsaV3_7G027520	CsaV3_1G011330/CsaV3_1G013070/CsaV3_1G040810/CsaV3_2G004030/CsaV3_2G010090/CsaV3_2G031600/CsaV3_3G004330/CsaV3_4G007600/CsaV3_5G026220/CsaV3_5G030320/CsaV3_5G030690/CsaV3_6G035930/CsaV3_7G004070/CsaV3_7G004300/CsaV3_7G027520	15
BP	GO:0006633	fatty acid biosynthetic process	100383	34/6278	0.671713	0.981024	CsaV3_1G030920/CsaV3_2G028690/CsaV3_3G003250/CsaV3_3G010300/CsaV3_3G016490/CsaV3_3G017450/CsaV3_4G028790/CsaV3_5G002520/CsaV3_5G003990/CsaV3_5G023610/CsaV3_6G052510	CsaV3_1G030920/CsaV3_2G028690/CsaV3_3G003250/CsaV3_3G010300/CsaV3_3G016490/CsaV3_3G017450/CsaV3_4G028790/CsaV3_5G002520/CsaV3_5G003990/CsaV3_5G023610/CsaV3_6G052510	11
BP	GO:0044248	cellular catabolic process	40/2174	121/6278	0.67561	0.983336	CsaV3_1G003090/CsaV3_1G012640/CsaV3_1G035920/CsaV3_1G041450/CsaV3_1G043980/CsaV3_1G046270/CsaV3_2G001660/CsaV3_2G013320/CsaV3_2G013440/CsaV3_2G024370/CsaV3_2G028900/CsaV3_2G030420/CsaV3_2G031230/CsaV3_3G019890/CsaV3_3G019900/CsaV3_3G021780/CsaV3_3G023420/CsaV3_3G032680/CsaV3_3G035920/CsaV3_3G041550/CsaV3_3G043520/CsaV3_4G032560/CsaV3_4G034140/CsaV3_4G037690/CsaV3_5G025230/CsaV3_5G029170/CsaV3_5G0…	CsaV3_1G003090/CsaV3_1G012640/CsaV3_1G035920/CsaV3_1G041450/CsaV3_1G043980/CsaV3_1G046270/CsaV3_2G001660/CsaV3_2G013320/CsaV3_2G013440/CsaV3_2G024370/CsaV3_2G028900/CsaV3_2G030420/CsaV3_2G031230/CsaV3_3G019890/CsaV3_3G019900/CsaV3_3G021780/CsaV3_3G023420/CsaV3_3G032680/CsaV3_3G035920/CsaV3_3G041550/CsaV3_3G043520/CsaV3_4G032560/CsaV3_4G034140/CsaV3_4G037690/CsaV3_5G025230/CsaV3_5G029170/CsaV3_5G0…	40
BP	GO:1901575	organic substance catabolic process	45/2174	136/6278	0.679276	0.985298	CsaV3_1G003090/CsaV3_1G012640/CsaV3_1G035920/CsaV3_1G041450/CsaV3_1G046270/CsaV3_2G001660/CsaV3_2G013320/CsaV3_2G013440/CsaV3_2G024370/CsaV3_2G028900/CsaV3_2G030420/CsaV3_2G031230/CsaV3_3G002150/CsaV3_3G011520/CsaV3_3G019890/CsaV3_3G019900/CsaV3_3G020970/CsaV3_3G021780/CsaV3_3G023420/CsaV3_3G032680/CsaV3_3G035920/CsaV3_3G041550/CsaV3_4G013550/CsaV3_4G032560/CsaV3_4G034140/CsaV3_4G037690/CsaV3_5G0…	CsaV3_1G003090/CsaV3_1G012640/CsaV3_1G035920/CsaV3_1G041450/CsaV3_1G046270/CsaV3_2G001660/CsaV3_2G013320/CsaV3_2G013440/CsaV3_2G024370/CsaV3_2G028900/CsaV3_2G030420/CsaV3_2G031230/CsaV3_3G002150/CsaV3_3G011520/CsaV3_3G019890/CsaV3_3G019900/CsaV3_3G020970/CsaV3_3G021780/CsaV3_3G023420/CsaV3_3G032680/CsaV3_3G035920/CsaV3_3G041550/CsaV3_4G013550/CsaV3_4G032560/CsaV3_4G034140/CsaV3_4G037690/CsaV3_5G0…	45
BP	GO:0007165	signal transduction	61/2174	184/6278	0.691499	0.989803	CsaV3_1G001860/CsaV3_1G004280/CsaV3_1G015390/CsaV3_1G029700/CsaV3_1G029790/CsaV3_1G036200/CsaV3_1G039330/CsaV3_1G043470/CsaV3_1G044700/CsaV3_2G002140/CsaV3_2G004870/CsaV3_2G004890/CsaV3_2G009260/CsaV3_2G013330/CsaV3_2G016070/CsaV3_2G017730/CsaV3_2G021030/CsaV3_2G024270/CsaV3_2G025170/CsaV3_2G031840/CsaV3_2G033620/CsaV3_2G034580/CsaV3_3G002400/CsaV3_3G003810/CsaV3_3G005860/CsaV3_3G006490/CsaV3_3G0…	CsaV3_1G001860/CsaV3_1G004280/CsaV3_1G015390/CsaV3_1G029700/CsaV3_1G029790/CsaV3_1G036200/CsaV3_1G039330/CsaV3_1G043470/CsaV3_1G044700/CsaV3_2G002140/CsaV3_2G004870/CsaV3_2G004890/CsaV3_2G009260/CsaV3_2G013330/CsaV3_2G016070/CsaV3_2G017730/CsaV3_2G021030/CsaV3_2G024270/CsaV3_2G025170/CsaV3_2G031840/CsaV3_2G033620/CsaV3_2G034580/CsaV3_3G002400/CsaV3_3G003810/CsaV3_3G005860/CsaV3_3G006490/CsaV3_3G0…	61
BP	GO:0023052	signaling	61/2174	184/6278	0.691499	0.989803	CsaV3_1G001860/CsaV3_1G004280/CsaV3_1G015390/CsaV3_1G029700/CsaV3_1G029790/CsaV3_1G036200/CsaV3_1G039330/CsaV3_1G043470/CsaV3_1G044700/CsaV3_2G002140/CsaV3_2G004870/CsaV3_2G004890/CsaV3_2G009260/CsaV3_2G013330/CsaV3_2G016070/CsaV3_2G017730/CsaV3_2G021030/CsaV3_2G024270/CsaV3_2G025170/CsaV3_2G031840/CsaV3_2G033620/CsaV3_2G034580/CsaV3_3G002400/CsaV3_3G003810/CsaV3_3G005860/CsaV3_3G006490/CsaV3_3G0…	CsaV3_1G001860/CsaV3_1G004280/CsaV3_1G015390/CsaV3_1G029700/CsaV3_1G029790/CsaV3_1G036200/CsaV3_1G039330/CsaV3_1G043470/CsaV3_1G044700/CsaV3_2G002140/CsaV3_2G004870/CsaV3_2G004890/CsaV3_2G009260/CsaV3_2G013330/CsaV3_2G016070/CsaV3_2G017730/CsaV3_2G021030/CsaV3_2G024270/CsaV3_2G025170/CsaV3_2G031840/CsaV3_2G033620/CsaV3_2G034580/CsaV3_3G002400/CsaV3_3G003810/CsaV3_3G005860/CsaV3_3G006490/CsaV3_3G0…	61
BP	GO:0009072	aromatic amino acid family metabolic process	100230	19/6278	0.691697	0.989803	CsaV3_3G004760/CsaV3_3G041590/CsaV3_6G014760/CsaV3_6G045310/CsaV3_7G006730/CsaV3_7G008280	CsaV3_3G004760/CsaV3_3G041590/CsaV3_6G014760/CsaV3_6G045310/CsaV3_7G006730/CsaV3_7G008280	6
BP	GO:0051726	regulation of cell cycle	100230	19/6278	0.691697	0.989803	CsaV3_2G005220/CsaV3_5G025150/CsaV3_5G033110/CsaV3_5G036930/CsaV3_7G008680/CsaV3_7G028110	CsaV3_2G005220/CsaV3_5G025150/CsaV3_5G033110/CsaV3_5G036930/CsaV3_7G008680/CsaV3_7G028110	6
BP	GO:0006399	tRNA metabolic process	22/2174	68/6278	0.696664	0.990554	CsaV3_1G003150/CsaV3_1G012830/CsaV3_1G038230/CsaV3_1G039630/CsaV3_2G008510/CsaV3_2G031130/CsaV3_2G035640/CsaV3_3G002020/CsaV3_3G009910/CsaV3_3G014640/CsaV3_3G017360/CsaV3_3G031480/CsaV3_3G035920/CsaV3_3G048470/CsaV3_4G003190/CsaV3_5G002780/CsaV3_5G005970/CsaV3_5G013970/CsaV3_5G015730/CsaV3_5G026430/CsaV3_6G008710/CsaV3_6G048760	CsaV3_1G003150/CsaV3_1G012830/CsaV3_1G038230/CsaV3_1G039630/CsaV3_2G008510/CsaV3_2G031130/CsaV3_2G035640/CsaV3_3G002020/CsaV3_3G009910/CsaV3_3G014640/CsaV3_3G017360/CsaV3_3G031480/CsaV3_3G035920/CsaV3_3G048470/CsaV3_4G003190/CsaV3_5G002780/CsaV3_5G005970/CsaV3_5G013970/CsaV3_5G015730/CsaV3_5G026430/CsaV3_6G008710/CsaV3_6G048760	22
BP	GO:0042221	response to chemical	35/2174	107/6278	0.696884	0.990554	CsaV3_1G001040/CsaV3_1G001050/CsaV3_1G004170/CsaV3_1G004180/CsaV3_1G011510/CsaV3_1G039850/CsaV3_2G015200/CsaV3_2G015370/CsaV3_2G015380/CsaV3_2G029970/CsaV3_2G030540/CsaV3_3G007730/CsaV3_3G045690/CsaV3_3G045710/CsaV3_4G024250/CsaV3_4G033600/CsaV3_5G000180/CsaV3_5G003620/CsaV3_5G031190/CsaV3_5G040020/CsaV3_6G007500/CsaV3_6G013600/CsaV3_6G021720/CsaV3_6G031720/CsaV3_6G050480/CsaV3_6G052060/CsaV3_7G0…	CsaV3_1G001040/CsaV3_1G001050/CsaV3_1G004170/CsaV3_1G004180/CsaV3_1G011510/CsaV3_1G039850/CsaV3_2G015200/CsaV3_2G015370/CsaV3_2G015380/CsaV3_2G029970/CsaV3_2G030540/CsaV3_3G007730/CsaV3_3G045690/CsaV3_3G045710/CsaV3_4G024250/CsaV3_4G033600/CsaV3_5G000180/CsaV3_5G003620/CsaV3_5G031190/CsaV3_5G040020/CsaV3_6G007500/CsaV3_6G013600/CsaV3_6G021720/CsaV3_6G031720/CsaV3_6G050480/CsaV3_6G052060/CsaV3_7G0…	35
BP	GO:0070972	protein localization to endoplasmic reticulum	100199	16/6278	0.70032	0.99212	CsaV3_1G036760/CsaV3_2G007560/CsaV3_2G013670/CsaV3_5G030580/CsaV3_6G040720	CsaV3_1G036760/CsaV3_2G007560/CsaV3_2G013670/CsaV3_5G030580/CsaV3_6G040720	5
BP	GO:0010638	positive regulation of organelle organization	100138	1599307	0.73049	0.999749	CsaV3_1G043050/CsaV3_3G003930/CsaV3_4G031280	CsaV3_1G043050/CsaV3_3G003930/CsaV3_4G031280	3
BP	GO:0016485	protein processing	100138	1599307	0.73049	0.999749	CsaV3_1G006000/CsaV3_3G017820/CsaV3_5G008920	CsaV3_1G006000/CsaV3_3G017820/CsaV3_5G008920	3
BP	GO:0031334	positive regulation of protein complex assembly	100138	1599307	0.73049	0.999749	CsaV3_1G043050/CsaV3_3G003930/CsaV3_4G031280	CsaV3_1G043050/CsaV3_3G003930/CsaV3_4G031280	3
BP	GO:0032273	positive regulation of protein polymerization	100138	1599307	0.73049	0.999749	CsaV3_1G043050/CsaV3_3G003930/CsaV3_4G031280	CsaV3_1G043050/CsaV3_3G003930/CsaV3_4G031280	3
BP	GO:0044089	positive regulation of cellular component biogenesis	100138	1599307	0.73049	0.999749	CsaV3_1G043050/CsaV3_3G003930/CsaV3_4G031280	CsaV3_1G043050/CsaV3_3G003930/CsaV3_4G031280	3
BP	GO:0051495	positive regulation of cytoskeleton organization	100138	1599307	0.73049	0.999749	CsaV3_1G043050/CsaV3_3G003930/CsaV3_4G031280	CsaV3_1G043050/CsaV3_3G003930/CsaV3_4G031280	3
BP	GO:1902905	positive regulation of supramolecular fiber organization	100138	1599307	0.73049	0.999749	CsaV3_1G043050/CsaV3_3G003930/CsaV3_4G031280	CsaV3_1G043050/CsaV3_3G003930/CsaV3_4G031280	3
BP	GO:0008104	protein localization	39/2174	121/6278	0.742304	0.999749	CsaV3_1G006710/CsaV3_1G014870/CsaV3_1G023100/CsaV3_1G034030/CsaV3_1G036760/CsaV3_2G007560/CsaV3_2G012420/CsaV3_2G013670/CsaV3_2G014650/CsaV3_2G015150/CsaV3_2G031010/CsaV3_3G033250/CsaV3_3G041240/CsaV3_3G047380/CsaV3_3G048660/CsaV3_4G006230/CsaV3_4G026140/CsaV3_5G029500/CsaV3_5G030580/CsaV3_5G033760/CsaV3_5G038260/CsaV3_6G001890/CsaV3_6G002880/CsaV3_6G003390/CsaV3_6G004490/CsaV3_6G006390/CsaV3_6G0…	CsaV3_1G006710/CsaV3_1G014870/CsaV3_1G023100/CsaV3_1G034030/CsaV3_1G036760/CsaV3_2G007560/CsaV3_2G012420/CsaV3_2G013670/CsaV3_2G014650/CsaV3_2G015150/CsaV3_2G031010/CsaV3_3G033250/CsaV3_3G041240/CsaV3_3G047380/CsaV3_3G048660/CsaV3_4G006230/CsaV3_4G026140/CsaV3_5G029500/CsaV3_5G030580/CsaV3_5G033760/CsaV3_5G038260/CsaV3_6G001890/CsaV3_6G002880/CsaV3_6G003390/CsaV3_6G004490/CsaV3_6G006390/CsaV3_6G0…	39
BP	GO:0017144	drug metabolic process	32/2174	100/6278	0.744303	0.999749	CsaV3_1G003090/CsaV3_1G005960/CsaV3_1G031480/CsaV3_1G035920/CsaV3_2G001570/CsaV3_2G007750/CsaV3_2G013320/CsaV3_2G030420/CsaV3_3G007840/CsaV3_3G010470/CsaV3_3G020560/CsaV3_3G021780/CsaV3_3G035920/CsaV3_4G001010/CsaV3_4G033150/CsaV3_4G037690/CsaV3_5G004930/CsaV3_5G012850/CsaV3_5G029170/CsaV3_5G034810/CsaV3_5G036470/CsaV3_6G003290/CsaV3_6G005510/CsaV3_6G014760/CsaV3_6G040330/CsaV3_6G040390/CsaV3_6G0…	CsaV3_1G003090/CsaV3_1G005960/CsaV3_1G031480/CsaV3_1G035920/CsaV3_2G001570/CsaV3_2G007750/CsaV3_2G013320/CsaV3_2G030420/CsaV3_3G007840/CsaV3_3G010470/CsaV3_3G020560/CsaV3_3G021780/CsaV3_3G035920/CsaV3_4G001010/CsaV3_4G033150/CsaV3_4G037690/CsaV3_5G004930/CsaV3_5G012850/CsaV3_5G029170/CsaV3_5G034810/CsaV3_5G036470/CsaV3_6G003290/CsaV3_6G005510/CsaV3_6G014760/CsaV3_6G040330/CsaV3_6G040390/CsaV3_6G0…	32
BP	GO:0034220	ion transmembrane transport	24/2174	76/6278	0.750667	0.999749	CsaV3_1G000720/CsaV3_1G005960/CsaV3_1G010210/CsaV3_1G010220/CsaV3_1G036370/CsaV3_2G001570/CsaV3_2G031740/CsaV3_3G007840/CsaV3_3G010470/CsaV3_3G034410/CsaV3_3G042200/CsaV3_4G007780/CsaV3_4G011960/CsaV3_4G025720/CsaV3_4G026660/CsaV3_5G010840/CsaV3_5G034670/CsaV3_5G034810/CsaV3_5G036470/CsaV3_6G004330/CsaV3_6G031870/CsaV3_6G036380/CsaV3_6G049050/CsaV3_7G007920	CsaV3_1G000720/CsaV3_1G005960/CsaV3_1G010210/CsaV3_1G010220/CsaV3_1G036370/CsaV3_2G001570/CsaV3_2G031740/CsaV3_3G007840/CsaV3_3G010470/CsaV3_3G034410/CsaV3_3G042200/CsaV3_4G007780/CsaV3_4G011960/CsaV3_4G025720/CsaV3_4G026660/CsaV3_5G010840/CsaV3_5G034670/CsaV3_5G034810/CsaV3_5G036470/CsaV3_6G004330/CsaV3_6G031870/CsaV3_6G036380/CsaV3_6G049050/CsaV3_7G007920	24
BP	GO:0006813	potassium ion transport	100199	17/6278	0.755569	0.999749	CsaV3_1G010210/CsaV3_1G010220/CsaV3_1G036370/CsaV3_3G042200/CsaV3_5G010840	CsaV3_1G010210/CsaV3_1G010220/CsaV3_1G036370/CsaV3_3G042200/CsaV3_5G010840	5
BP	GO:0032259	methylation	100199	17/6278	0.755569	0.999749	CsaV3_2G014840/CsaV3_3G011580/CsaV3_3G027790/CsaV3_3G040650/CsaV3_6G007420	CsaV3_2G014840/CsaV3_3G011580/CsaV3_3G027790/CsaV3_3G040650/CsaV3_6G007420	5
BP	GO:0007186	G-protein coupled receptor signaling pathway	100169	14/6278	0.771102	0.999749	CsaV3_2G013330/CsaV3_3G005860/CsaV3_3G012780/CsaV3_3G046910	CsaV3_2G013330/CsaV3_3G005860/CsaV3_3G012780/CsaV3_3G046910	4
BP	GO:0008380	RNA splicing	100169	14/6278	0.771102	0.999749	CsaV3_2G008750/CsaV3_6G008590/CsaV3_7G025770/CsaV3_7G028060	CsaV3_2G008750/CsaV3_6G008590/CsaV3_7G025770/CsaV3_7G028060	4
BP	GO:0034660	ncRNA metabolic process	27/2174	86/6278	0.771369	0.999749	CsaV3_1G000640/CsaV3_1G003150/CsaV3_1G012830/CsaV3_1G038230/CsaV3_1G039630/CsaV3_2G008510/CsaV3_2G014840/CsaV3_2G015360/CsaV3_2G031130/CsaV3_2G035640/CsaV3_3G002020/CsaV3_3G009910/CsaV3_3G014640/CsaV3_3G017360/CsaV3_3G031480/CsaV3_3G035920/CsaV3_3G046940/CsaV3_3G048470/CsaV3_4G003190/CsaV3_5G002780/CsaV3_5G005970/CsaV3_5G013970/CsaV3_5G015730/CsaV3_5G026430/CsaV3_6G008710/CsaV3_6G048760/CsaV3_7G0…	CsaV3_1G000640/CsaV3_1G003150/CsaV3_1G012830/CsaV3_1G038230/CsaV3_1G039630/CsaV3_2G008510/CsaV3_2G014840/CsaV3_2G015360/CsaV3_2G031130/CsaV3_2G035640/CsaV3_3G002020/CsaV3_3G009910/CsaV3_3G014640/CsaV3_3G017360/CsaV3_3G031480/CsaV3_3G035920/CsaV3_3G046940/CsaV3_3G048470/CsaV3_4G003190/CsaV3_5G002780/CsaV3_5G005970/CsaV3_5G013970/CsaV3_5G015730/CsaV3_5G026430/CsaV3_6G008710/CsaV3_6G048760/CsaV3_7G0…	27
BP	GO:0042592	homeostatic process	26/2174	83/6278	0.772629	0.999749	CsaV3_1G011310/CsaV3_1G012800/CsaV3_1G032050/CsaV3_1G032060/CsaV3_1G044160/CsaV3_2G009510/CsaV3_2G027800/CsaV3_2G033620/CsaV3_2G035050/CsaV3_3G038140/CsaV3_3G040410/CsaV3_3G043360/CsaV3_4G033180/CsaV3_4G034020/CsaV3_5G001610/CsaV3_5G008640/CsaV3_5G010460/CsaV3_5G017500/CsaV3_5G027260/CsaV3_5G036690/CsaV3_5G039280/CsaV3_6G015540/CsaV3_6G042720/CsaV3_6G051900/CsaV3_7G008540/CsaV3_7G029820	CsaV3_1G011310/CsaV3_1G012800/CsaV3_1G032050/CsaV3_1G032060/CsaV3_1G044160/CsaV3_2G009510/CsaV3_2G027800/CsaV3_2G033620/CsaV3_2G035050/CsaV3_3G038140/CsaV3_3G040410/CsaV3_3G043360/CsaV3_4G033180/CsaV3_4G034020/CsaV3_5G001610/CsaV3_5G008640/CsaV3_5G010460/CsaV3_5G017500/CsaV3_5G027260/CsaV3_5G036690/CsaV3_5G039280/CsaV3_6G015540/CsaV3_6G042720/CsaV3_6G051900/CsaV3_7G008540/CsaV3_7G029820	26
BP	GO:0030163	protein catabolic process	14/2174	46/6278	0.772805	0.999749	CsaV3_1G046270/CsaV3_2G024370/CsaV3_2G028900/CsaV3_2G031230/CsaV3_3G019890/CsaV3_3G019900/CsaV3_3G032680/CsaV3_3G041550/CsaV3_4G032560/CsaV3_5G034230/CsaV3_6G006240/CsaV3_6G007200/CsaV3_6G047290/CsaV3_7G003400	CsaV3_1G046270/CsaV3_2G024370/CsaV3_2G028900/CsaV3_2G031230/CsaV3_3G019890/CsaV3_3G019900/CsaV3_3G032680/CsaV3_3G041550/CsaV3_4G032560/CsaV3_5G034230/CsaV3_6G006240/CsaV3_6G007200/CsaV3_6G047290/CsaV3_7G003400	14
BP	GO:0044257	cellular protein catabolic process	13/2174	43/6278	0.776792	0.999749	CsaV3_1G046270/CsaV3_2G024370/CsaV3_2G028900/CsaV3_2G031230/CsaV3_3G019890/CsaV3_3G019900/CsaV3_3G032680/CsaV3_3G041550/CsaV3_4G032560/CsaV3_5G034230/CsaV3_6G007200/CsaV3_6G047290/CsaV3_7G003400	CsaV3_1G046270/CsaV3_2G024370/CsaV3_2G028900/CsaV3_2G031230/CsaV3_3G019890/CsaV3_3G019900/CsaV3_3G032680/CsaV3_3G041550/CsaV3_4G032560/CsaV3_5G034230/CsaV3_6G007200/CsaV3_6G047290/CsaV3_7G003400	13
BP	GO:0051603	proteolysis involved in cellular protein catabolic process	13/2174	43/6278	0.776792	0.999749	CsaV3_1G046270/CsaV3_2G024370/CsaV3_2G028900/CsaV3_2G031230/CsaV3_3G019890/CsaV3_3G019900/CsaV3_3G032680/CsaV3_3G041550/CsaV3_4G032560/CsaV3_5G034230/CsaV3_6G007200/CsaV3_6G047290/CsaV3_7G003400	CsaV3_1G046270/CsaV3_2G024370/CsaV3_2G028900/CsaV3_2G031230/CsaV3_3G019890/CsaV3_3G019900/CsaV3_3G032680/CsaV3_3G041550/CsaV3_4G032560/CsaV3_5G034230/CsaV3_6G007200/CsaV3_6G047290/CsaV3_7G003400	13
BP	GO:0071702	organic substance transport	48/2174	150/6278	0.778813	0.999749	CsaV3_1G000720/CsaV3_1G006710/CsaV3_1G014870/CsaV3_1G023100/CsaV3_1G036760/CsaV3_1G043750/CsaV3_2G007560/CsaV3_2G012420/CsaV3_2G013670/CsaV3_2G014650/CsaV3_2G015150/CsaV3_2G031010/CsaV3_3G033250/CsaV3_3G041240/CsaV3_3G047380/CsaV3_3G048660/CsaV3_4G006230/CsaV3_4G007780/CsaV3_4G011960/CsaV3_4G026140/CsaV3_5G029500/CsaV3_5G030580/CsaV3_5G033760/CsaV3_5G034670/CsaV3_5G038260/CsaV3_6G001890/CsaV3_6G0…	CsaV3_1G000720/CsaV3_1G006710/CsaV3_1G014870/CsaV3_1G023100/CsaV3_1G036760/CsaV3_1G043750/CsaV3_2G007560/CsaV3_2G012420/CsaV3_2G013670/CsaV3_2G014650/CsaV3_2G015150/CsaV3_2G031010/CsaV3_3G033250/CsaV3_3G041240/CsaV3_3G047380/CsaV3_3G048660/CsaV3_4G006230/CsaV3_4G007780/CsaV3_4G011960/CsaV3_4G026140/CsaV3_5G029500/CsaV3_5G030580/CsaV3_5G033760/CsaV3_5G034670/CsaV3_5G038260/CsaV3_6G001890/CsaV3_6G0…	48
BP	GO:1901565	organonitrogen compound catabolic process	21/2174	68/6278	0.781004	0.999749	CsaV3_1G012640/CsaV3_1G046270/CsaV3_2G013440/CsaV3_2G024370/CsaV3_2G028900/CsaV3_2G031230/CsaV3_3G019890/CsaV3_3G019900/CsaV3_3G032680/CsaV3_3G041550/CsaV3_4G032560/CsaV3_4G034140/CsaV3_5G025230/CsaV3_5G030450/CsaV3_5G034230/CsaV3_6G006240/CsaV3_6G007200/CsaV3_6G047290/CsaV3_6G047720/CsaV3_7G003400/CsaV3_7G008280	CsaV3_1G012640/CsaV3_1G046270/CsaV3_2G013440/CsaV3_2G024370/CsaV3_2G028900/CsaV3_2G031230/CsaV3_3G019890/CsaV3_3G019900/CsaV3_3G032680/CsaV3_3G041550/CsaV3_4G032560/CsaV3_4G034140/CsaV3_5G025230/CsaV3_5G030450/CsaV3_5G034230/CsaV3_6G006240/CsaV3_6G007200/CsaV3_6G047290/CsaV3_6G047720/CsaV3_7G003400/CsaV3_7G008280	21
BP	GO:0033036	macromolecule localization	41/2174	129/6278	0.78117	0.999749	CsaV3_1G006710/CsaV3_1G014870/CsaV3_1G023100/CsaV3_1G034030/CsaV3_1G036760/CsaV3_1G044520/CsaV3_2G007560/CsaV3_2G012420/CsaV3_2G013670/CsaV3_2G014650/CsaV3_2G015150/CsaV3_2G031010/CsaV3_3G033250/CsaV3_3G041240/CsaV3_3G047380/CsaV3_3G048660/CsaV3_4G006230/CsaV3_4G026140/CsaV3_5G029500/CsaV3_5G030580/CsaV3_5G033760/CsaV3_5G038260/CsaV3_6G001890/CsaV3_6G002880/CsaV3_6G003390/CsaV3_6G004490/CsaV3_6G0…	CsaV3_1G006710/CsaV3_1G014870/CsaV3_1G023100/CsaV3_1G034030/CsaV3_1G036760/CsaV3_1G044520/CsaV3_2G007560/CsaV3_2G012420/CsaV3_2G013670/CsaV3_2G014650/CsaV3_2G015150/CsaV3_2G031010/CsaV3_3G033250/CsaV3_3G041240/CsaV3_3G047380/CsaV3_3G048660/CsaV3_4G006230/CsaV3_4G026140/CsaV3_5G029500/CsaV3_5G030580/CsaV3_5G033760/CsaV3_5G038260/CsaV3_6G001890/CsaV3_6G002880/CsaV3_6G003390/CsaV3_6G004490/CsaV3_6G0…	41
BP	GO:0009451	RNA modification	100352	34/6278	0.792482	0.999749	CsaV3_1G000320/CsaV3_1G010950/CsaV3_2G031130/CsaV3_3G009910/CsaV3_3G035920/CsaV3_4G037020/CsaV3_4G037060/CsaV3_5G040460/CsaV3_6G004840/CsaV3_6G037280	CsaV3_1G000320/CsaV3_1G010950/CsaV3_2G031130/CsaV3_3G009910/CsaV3_3G035920/CsaV3_4G037020/CsaV3_4G037060/CsaV3_5G040460/CsaV3_6G004840/CsaV3_6G037280	10
BP	GO:0042254	ribosome biogenesis	100352	34/6278	0.792482	0.999749	CsaV3_1G000640/CsaV3_2G014840/CsaV3_2G015360/CsaV3_3G017360/CsaV3_3G046940/CsaV3_5G005970/CsaV3_5G006380/CsaV3_5G008980/CsaV3_7G007700/CsaV3_7G021630	CsaV3_1G000640/CsaV3_2G014840/CsaV3_2G015360/CsaV3_3G017360/CsaV3_3G046940/CsaV3_5G005970/CsaV3_5G006380/CsaV3_5G008980/CsaV3_7G007700/CsaV3_7G021630	10
BP	GO:0000375	RNA splicing, via transesterification reactions	100138	1599338	0.792843	0.999749	CsaV3_2G008750/CsaV3_6G008590/CsaV3_7G025770	CsaV3_2G008750/CsaV3_6G008590/CsaV3_7G025770	3
BP	GO:0000377	RNA splicing, via transesterification reactions with bulged adenosine as nucleophile	100138	1599338	0.792843	0.999749	CsaV3_2G008750/CsaV3_6G008590/CsaV3_7G025770	CsaV3_2G008750/CsaV3_6G008590/CsaV3_7G025770	3
BP	GO:0000398	mRNA splicing, via spliceosome	100138	1599338	0.792843	0.999749	CsaV3_2G008750/CsaV3_6G008590/CsaV3_7G025770	CsaV3_2G008750/CsaV3_6G008590/CsaV3_7G025770	3
BP	GO:0016042	lipid catabolic process	100138	1599338	0.792843	0.999749	CsaV3_3G020970/CsaV3_6G000490/CsaV3_6G022670	CsaV3_3G020970/CsaV3_6G000490/CsaV3_6G022670	3
BP	GO:0019684	photosynthesis, light reaction	100138	1599338	0.792843	0.999749	CsaV3_5G030320/CsaV3_7G004070/CsaV3_7G004300	CsaV3_5G030320/CsaV3_7G004070/CsaV3_7G004300	3
BP	GO:0033865	nucleoside bisphosphate metabolic process	100138	1599338	0.792843	0.999749	CsaV3_3G015600/CsaV3_4G000980/CsaV3_4G008710	CsaV3_3G015600/CsaV3_4G000980/CsaV3_4G008710	3
BP	GO:0033875	ribonucleoside bisphosphate metabolic process	100138	1599338	0.792843	0.999749	CsaV3_3G015600/CsaV3_4G000980/CsaV3_4G008710	CsaV3_3G015600/CsaV3_4G000980/CsaV3_4G008710	3
BP	GO:0034032	purine nucleoside bisphosphate metabolic process	100138	1599338	0.792843	0.999749	CsaV3_3G015600/CsaV3_4G000980/CsaV3_4G008710	CsaV3_3G015600/CsaV3_4G000980/CsaV3_4G008710	3
BP	GO:0051604	protein maturation	100138	1599338	0.792843	0.999749	CsaV3_1G006000/CsaV3_3G017820/CsaV3_5G008920	CsaV3_1G006000/CsaV3_3G017820/CsaV3_5G008920	3
BP	GO:0055085	transmembrane transport	134/2174	409/6278	0.80865	0.999749	CsaV3_1G000720/CsaV3_1G001040/CsaV3_1G001050/CsaV3_1G001720/CsaV3_1G002020/CsaV3_1G004170/CsaV3_1G004180/CsaV3_1G004690/CsaV3_1G005960/CsaV3_1G010210/CsaV3_1G010220/CsaV3_1G011510/CsaV3_1G014520/CsaV3_1G015650/CsaV3_1G030110/CsaV3_1G036370/CsaV3_1G039070/CsaV3_1G039850/CsaV3_1G040300/CsaV3_1G042260/CsaV3_2G001570/CsaV3_2G003310/CsaV3_2G007530/CsaV3_2G010960/CsaV3_2G015200/CsaV3_2G016770/CsaV3_2G0…	CsaV3_1G000720/CsaV3_1G001040/CsaV3_1G001050/CsaV3_1G001720/CsaV3_1G002020/CsaV3_1G004170/CsaV3_1G004180/CsaV3_1G004690/CsaV3_1G005960/CsaV3_1G010210/CsaV3_1G010220/CsaV3_1G011510/CsaV3_1G014520/CsaV3_1G015650/CsaV3_1G030110/CsaV3_1G036370/CsaV3_1G039070/CsaV3_1G039850/CsaV3_1G040300/CsaV3_1G042260/CsaV3_2G001570/CsaV3_2G003310/CsaV3_2G007530/CsaV3_2G010960/CsaV3_2G015200/CsaV3_2G016770/CsaV3_2G0…	134
BP	GO:0008654	phospholipid biosynthetic process	100260	25/6278	0.817064	0.999749	CsaV3_4G022060/CsaV3_5G028680/CsaV3_5G033710/CsaV3_6G049130/CsaV3_7G006180/CsaV3_7G010240/CsaV3_UNG190490	CsaV3_4G022060/CsaV3_5G028680/CsaV3_5G033710/CsaV3_6G049130/CsaV3_7G006180/CsaV3_7G010240/CsaV3_UNG190490	7
BP	GO:0019725	cellular homeostasis	25/2174	82/6278	0.818078	0.999749	CsaV3_1G011310/CsaV3_1G012800/CsaV3_1G032050/CsaV3_1G032060/CsaV3_1G044160/CsaV3_2G009510/CsaV3_2G027800/CsaV3_2G033620/CsaV3_2G035050/CsaV3_3G038140/CsaV3_3G040410/CsaV3_3G043360/CsaV3_4G033180/CsaV3_5G001610/CsaV3_5G008640/CsaV3_5G010460/CsaV3_5G017500/CsaV3_5G027260/CsaV3_5G036690/CsaV3_5G039280/CsaV3_6G015540/CsaV3_6G042720/CsaV3_6G051900/CsaV3_7G008540/CsaV3_7G029820	CsaV3_1G011310/CsaV3_1G012800/CsaV3_1G032050/CsaV3_1G032060/CsaV3_1G044160/CsaV3_2G009510/CsaV3_2G027800/CsaV3_2G033620/CsaV3_2G035050/CsaV3_3G038140/CsaV3_3G040410/CsaV3_3G043360/CsaV3_4G033180/CsaV3_5G001610/CsaV3_5G008640/CsaV3_5G010460/CsaV3_5G017500/CsaV3_5G027260/CsaV3_5G036690/CsaV3_5G039280/CsaV3_6G015540/CsaV3_6G042720/CsaV3_6G051900/CsaV3_7G008540/CsaV3_7G029820	25
BP	GO:0008272	sulfate transport	100169	15/6278	0.819894	0.999749	CsaV3_3G012960/CsaV3_4G028730/CsaV3_7G027830/CsaV3_7G033120	CsaV3_3G012960/CsaV3_4G028730/CsaV3_7G027830/CsaV3_7G033120	4
BP	GO:0072348	sulfur compound transport	100169	15/6278	0.819894	0.999749	CsaV3_3G012960/CsaV3_4G028730/CsaV3_7G027830/CsaV3_7G033120	CsaV3_3G012960/CsaV3_4G028730/CsaV3_7G027830/CsaV3_7G033120	4
BP	GO:0098655	cation transmembrane transport	17/2174	58/6278	0.839867	0.999749	CsaV3_1G005960/CsaV3_1G010210/CsaV3_1G010220/CsaV3_1G036370/CsaV3_2G001570/CsaV3_2G031740/CsaV3_3G007840/CsaV3_3G010470/CsaV3_3G034410/CsaV3_3G042200/CsaV3_4G025720/CsaV3_4G026660/CsaV3_5G010840/CsaV3_5G034810/CsaV3_5G036470/CsaV3_6G031870/CsaV3_6G049050	CsaV3_1G005960/CsaV3_1G010210/CsaV3_1G010220/CsaV3_1G036370/CsaV3_2G001570/CsaV3_2G031740/CsaV3_3G007840/CsaV3_3G010470/CsaV3_3G034410/CsaV3_3G042200/CsaV3_4G025720/CsaV3_4G026660/CsaV3_5G010840/CsaV3_5G034810/CsaV3_5G036470/CsaV3_6G031870/CsaV3_6G049050	17
BP	GO:0098660	inorganic ion transmembrane transport	17/2174	58/6278	0.839867	0.999749	CsaV3_1G005960/CsaV3_1G010210/CsaV3_1G010220/CsaV3_1G036370/CsaV3_2G001570/CsaV3_2G031740/CsaV3_3G007840/CsaV3_3G010470/CsaV3_3G034410/CsaV3_3G042200/CsaV3_4G025720/CsaV3_4G026660/CsaV3_5G010840/CsaV3_5G034810/CsaV3_5G036470/CsaV3_6G031870/CsaV3_6G049050	CsaV3_1G005960/CsaV3_1G010210/CsaV3_1G010220/CsaV3_1G036370/CsaV3_2G001570/CsaV3_2G031740/CsaV3_3G007840/CsaV3_3G010470/CsaV3_3G034410/CsaV3_3G042200/CsaV3_4G025720/CsaV3_4G026660/CsaV3_5G010840/CsaV3_5G034810/CsaV3_5G036470/CsaV3_6G031870/CsaV3_6G049050	17
BP	GO:0098662	inorganic cation transmembrane transport	17/2174	58/6278	0.839867	0.999749	CsaV3_1G005960/CsaV3_1G010210/CsaV3_1G010220/CsaV3_1G036370/CsaV3_2G001570/CsaV3_2G031740/CsaV3_3G007840/CsaV3_3G010470/CsaV3_3G034410/CsaV3_3G042200/CsaV3_4G025720/CsaV3_4G026660/CsaV3_5G010840/CsaV3_5G034810/CsaV3_5G036470/CsaV3_6G031870/CsaV3_6G049050	CsaV3_1G005960/CsaV3_1G010210/CsaV3_1G010220/CsaV3_1G036370/CsaV3_2G001570/CsaV3_2G031740/CsaV3_3G007840/CsaV3_3G010470/CsaV3_3G034410/CsaV3_3G042200/CsaV3_4G025720/CsaV3_4G026660/CsaV3_5G010840/CsaV3_5G034810/CsaV3_5G036470/CsaV3_6G031870/CsaV3_6G049050	17
BP	GO:0042546	cell wall biogenesis	100138	1599368	0.842652	0.999749	CsaV3_1G003410/CsaV3_5G032970/CsaV3_7G000770	CsaV3_1G003410/CsaV3_5G032970/CsaV3_7G000770	3
BP	GO:0022613	ribonucleoprotein complex biogenesis	100352	36/6278	0.85181	0.999749	CsaV3_1G000640/CsaV3_2G014840/CsaV3_2G015360/CsaV3_3G017360/CsaV3_3G046940/CsaV3_5G005970/CsaV3_5G006380/CsaV3_5G008980/CsaV3_7G007700/CsaV3_7G021630	CsaV3_1G000640/CsaV3_2G014840/CsaV3_2G015360/CsaV3_3G017360/CsaV3_3G046940/CsaV3_5G005970/CsaV3_5G006380/CsaV3_5G008980/CsaV3_7G007700/CsaV3_7G021630	10
BP	GO:0030001	metal ion transport	35/2174	115/6278	0.854126	0.999749	CsaV3_1G000430/CsaV3_1G010210/CsaV3_1G010220/CsaV3_1G015440/CsaV3_1G036370/CsaV3_1G039090/CsaV3_1G043220/CsaV3_2G006610/CsaV3_2G008620/CsaV3_2G025560/CsaV3_3G013710/CsaV3_3G032740/CsaV3_3G034410/CsaV3_3G035980/CsaV3_3G042200/CsaV3_3G049960/CsaV3_4G012010/CsaV3_4G024620/CsaV3_4G025720/CsaV3_4G026660/CsaV3_4G032400/CsaV3_5G001440/CsaV3_5G002910/CsaV3_5G010840/CsaV3_5G023740/CsaV3_5G029850/CsaV3_6G0…	CsaV3_1G000430/CsaV3_1G010210/CsaV3_1G010220/CsaV3_1G015440/CsaV3_1G036370/CsaV3_1G039090/CsaV3_1G043220/CsaV3_2G006610/CsaV3_2G008620/CsaV3_2G025560/CsaV3_3G013710/CsaV3_3G032740/CsaV3_3G034410/CsaV3_3G035980/CsaV3_3G042200/CsaV3_3G049960/CsaV3_4G012010/CsaV3_4G024620/CsaV3_4G025720/CsaV3_4G026660/CsaV3_4G032400/CsaV3_5G001440/CsaV3_5G002910/CsaV3_5G010840/CsaV3_5G023740/CsaV3_5G029850/CsaV3_6G0…	35
BP	GO:0007154	cell communication	70/2174	222/6278	0.855508	0.999749	CsaV3_1G001860/CsaV3_1G004280/CsaV3_1G011640/CsaV3_1G011650/CsaV3_1G015390/CsaV3_1G029700/CsaV3_1G029790/CsaV3_1G036200/CsaV3_1G039330/CsaV3_1G043470/CsaV3_1G044700/CsaV3_2G001430/CsaV3_2G002140/CsaV3_2G004870/CsaV3_2G004890/CsaV3_2G009260/CsaV3_2G013330/CsaV3_2G016070/CsaV3_2G017730/CsaV3_2G021030/CsaV3_2G022190/CsaV3_2G024270/CsaV3_2G025170/CsaV3_2G031840/CsaV3_2G033620/CsaV3_2G034580/CsaV3_3G0…	CsaV3_1G001860/CsaV3_1G004280/CsaV3_1G011640/CsaV3_1G011650/CsaV3_1G015390/CsaV3_1G029700/CsaV3_1G029790/CsaV3_1G036200/CsaV3_1G039330/CsaV3_1G043470/CsaV3_1G044700/CsaV3_2G001430/CsaV3_2G002140/CsaV3_2G004870/CsaV3_2G004890/CsaV3_2G009260/CsaV3_2G013330/CsaV3_2G016070/CsaV3_2G017730/CsaV3_2G021030/CsaV3_2G022190/CsaV3_2G024270/CsaV3_2G025170/CsaV3_2G031840/CsaV3_2G033620/CsaV3_2G034580/CsaV3_3G0…	70
BP	GO:0045454	cell redox homeostasis	24/2174	81/6278	0.858011	0.999749	CsaV3_1G011310/CsaV3_1G012800/CsaV3_1G032050/CsaV3_1G032060/CsaV3_1G044160/CsaV3_2G009510/CsaV3_2G027800/CsaV3_2G033620/CsaV3_2G035050/CsaV3_3G038140/CsaV3_3G040410/CsaV3_3G043360/CsaV3_4G033180/CsaV3_5G001610/CsaV3_5G008640/CsaV3_5G017500/CsaV3_5G027260/CsaV3_5G036690/CsaV3_5G039280/CsaV3_6G015540/CsaV3_6G042720/CsaV3_6G051900/CsaV3_7G008540/CsaV3_7G029820	CsaV3_1G011310/CsaV3_1G012800/CsaV3_1G032050/CsaV3_1G032060/CsaV3_1G044160/CsaV3_2G009510/CsaV3_2G027800/CsaV3_2G033620/CsaV3_2G035050/CsaV3_3G038140/CsaV3_3G040410/CsaV3_3G043360/CsaV3_4G033180/CsaV3_5G001610/CsaV3_5G008640/CsaV3_5G017500/CsaV3_5G027260/CsaV3_5G036690/CsaV3_5G039280/CsaV3_6G015540/CsaV3_6G042720/CsaV3_6G051900/CsaV3_7G008540/CsaV3_7G029820	24
BP	GO:0015711	organic anion transport	100291	30/6278	0.868038	0.999749	CsaV3_1G000720/CsaV3_1G043750/CsaV3_4G007780/CsaV3_4G011960/CsaV3_5G034670/CsaV3_6G004330/CsaV3_6G036380/CsaV3_7G007920	CsaV3_1G000720/CsaV3_1G043750/CsaV3_4G007780/CsaV3_4G011960/CsaV3_5G034670/CsaV3_6G004330/CsaV3_6G036380/CsaV3_7G007920	8
BP	GO:0015849	organic acid transport	100291	30/6278	0.868038	0.999749	CsaV3_1G000720/CsaV3_1G043750/CsaV3_4G007780/CsaV3_4G011960/CsaV3_5G034670/CsaV3_6G004330/CsaV3_6G036380/CsaV3_7G007920	CsaV3_1G000720/CsaV3_1G043750/CsaV3_4G007780/CsaV3_4G011960/CsaV3_5G034670/CsaV3_6G004330/CsaV3_6G036380/CsaV3_7G007920	8
BP	GO:0046942	carboxylic acid transport	100291	30/6278	0.868038	0.999749	CsaV3_1G000720/CsaV3_1G043750/CsaV3_4G007780/CsaV3_4G011960/CsaV3_5G034670/CsaV3_6G004330/CsaV3_6G036380/CsaV3_7G007920	CsaV3_1G000720/CsaV3_1G043750/CsaV3_4G007780/CsaV3_4G011960/CsaV3_5G034670/CsaV3_6G004330/CsaV3_6G036380/CsaV3_7G007920	8
BP	GO:0000160	phosphorelay signal transduction system	100383	40/6278	0.869223	0.999749	CsaV3_1G001860/CsaV3_1G039330/CsaV3_2G009260/CsaV3_2G025170/CsaV3_3G023600/CsaV3_3G040330/CsaV3_5G024480/CsaV3_5G028750/CsaV3_6G005590/CsaV3_6G008270/CsaV3_6G009450	CsaV3_1G001860/CsaV3_1G039330/CsaV3_2G009260/CsaV3_2G025170/CsaV3_3G023600/CsaV3_3G040330/CsaV3_5G024480/CsaV3_5G028750/CsaV3_6G005590/CsaV3_6G008270/CsaV3_6G009450	11
BP	GO:0009733	response to auxin	100383	40/6278	0.869223	0.999749	CsaV3_2G015370/CsaV3_2G015380/CsaV3_3G007730/CsaV3_3G045710/CsaV3_5G000180/CsaV3_6G013600/CsaV3_7G000650/CsaV3_7G000680/CsaV3_7G000690/CsaV3_7G000710/CsaV3_7G000720	CsaV3_2G015370/CsaV3_2G015380/CsaV3_3G007730/CsaV3_3G045710/CsaV3_5G000180/CsaV3_6G013600/CsaV3_7G000650/CsaV3_7G000680/CsaV3_7G000690/CsaV3_7G000710/CsaV3_7G000720	11
BP	GO:0006631	fatty acid metabolic process	14/2174	50/6278	0.873666	0.999749	CsaV3_1G030920/CsaV3_2G028690/CsaV3_3G003250/CsaV3_3G010300/CsaV3_3G016490/CsaV3_3G017450/CsaV3_3G019500/CsaV3_4G028790/CsaV3_5G002520/CsaV3_5G003990/CsaV3_5G023610/CsaV3_6G022310/CsaV3_6G030990/CsaV3_6G052510	CsaV3_1G030920/CsaV3_2G028690/CsaV3_3G003250/CsaV3_3G010300/CsaV3_3G016490/CsaV3_3G017450/CsaV3_3G019500/CsaV3_4G028790/CsaV3_5G002520/CsaV3_5G003990/CsaV3_5G023610/CsaV3_6G022310/CsaV3_6G030990/CsaV3_6G052510	14
BP	GO:0048193	Golgi vesicle transport	100199	20/6278	0.875303	0.999749	CsaV3_1G014870/CsaV3_1G031570/CsaV3_5G000990/CsaV3_5G025750/CsaV3_6G006300	CsaV3_1G014870/CsaV3_1G031570/CsaV3_5G000990/CsaV3_5G025750/CsaV3_6G006300	5
BP	GO:0033365	protein localization to organelle	100230	24/6278	0.889118	0.999749	CsaV3_1G036760/CsaV3_2G007560/CsaV3_2G013670/CsaV3_5G030580/CsaV3_6G004490/CsaV3_6G040720	CsaV3_1G036760/CsaV3_2G007560/CsaV3_2G013670/CsaV3_5G030580/CsaV3_6G004490/CsaV3_6G040720	6
BP	GO:0006413	translational initiation	100169	17/6278	0.891808	0.999749	CsaV3_1G023010/CsaV3_3G019240/CsaV3_7G003030/CsaV3_7G003720	CsaV3_1G023010/CsaV3_3G019240/CsaV3_7G003030/CsaV3_7G003720	4
BP	GO:0009719	response to endogenous stimulus	15/2174	55/6278	0.904219	0.999749	CsaV3_2G015370/CsaV3_2G015380/CsaV3_3G007730/CsaV3_3G045690/CsaV3_3G045710/CsaV3_5G000180/CsaV3_6G013600/CsaV3_6G021720/CsaV3_6G050480/CsaV3_6G052060/CsaV3_7G000650/CsaV3_7G000680/CsaV3_7G000690/CsaV3_7G000710/CsaV3_7G000720	CsaV3_2G015370/CsaV3_2G015380/CsaV3_3G007730/CsaV3_3G045690/CsaV3_3G045710/CsaV3_5G000180/CsaV3_6G013600/CsaV3_6G021720/CsaV3_6G050480/CsaV3_6G052060/CsaV3_7G000650/CsaV3_7G000680/CsaV3_7G000690/CsaV3_7G000710/CsaV3_7G000720	15
BP	GO:0009725	response to hormone	15/2174	55/6278	0.904219	0.999749	CsaV3_2G015370/CsaV3_2G015380/CsaV3_3G007730/CsaV3_3G045690/CsaV3_3G045710/CsaV3_5G000180/CsaV3_6G013600/CsaV3_6G021720/CsaV3_6G050480/CsaV3_6G052060/CsaV3_7G000650/CsaV3_7G000680/CsaV3_7G000690/CsaV3_7G000710/CsaV3_7G000720	CsaV3_2G015370/CsaV3_2G015380/CsaV3_3G007730/CsaV3_3G045690/CsaV3_3G045710/CsaV3_5G000180/CsaV3_6G013600/CsaV3_6G021720/CsaV3_6G050480/CsaV3_6G052060/CsaV3_7G000650/CsaV3_7G000680/CsaV3_7G000690/CsaV3_7G000710/CsaV3_7G000720	15
BP	GO:0010033	response to organic substance	15/2174	55/6278	0.904219	0.999749	CsaV3_2G015370/CsaV3_2G015380/CsaV3_3G007730/CsaV3_3G045690/CsaV3_3G045710/CsaV3_5G000180/CsaV3_6G013600/CsaV3_6G021720/CsaV3_6G050480/CsaV3_6G052060/CsaV3_7G000650/CsaV3_7G000680/CsaV3_7G000690/CsaV3_7G000710/CsaV3_7G000720	CsaV3_2G015370/CsaV3_2G015380/CsaV3_3G007730/CsaV3_3G045690/CsaV3_3G045710/CsaV3_5G000180/CsaV3_6G013600/CsaV3_6G021720/CsaV3_6G050480/CsaV3_6G052060/CsaV3_7G000650/CsaV3_7G000680/CsaV3_7G000690/CsaV3_7G000710/CsaV3_7G000720	15
BP	GO:0006505	GPI anchor metabolic process	100110	1599307	0.91043	0.999749	CsaV3_4G022060/CsaV3_6G006390	CsaV3_4G022060/CsaV3_6G006390	2
BP	GO:0006888	ER to Golgi vesicle-mediated transport	100110	1599307	0.91043	0.999749	CsaV3_1G014870/CsaV3_5G000990	CsaV3_1G014870/CsaV3_5G000990	2
BP	GO:0046474	glycerophospholipid biosynthetic process	100110	1599307	0.91043	0.999749	CsaV3_4G022060/CsaV3_5G028680	CsaV3_4G022060/CsaV3_5G028680	2
BP	GO:0070838	divalent metal ion transport	100110	1599307	0.91043	0.999749	CsaV3_1G043220/CsaV3_5G029850	CsaV3_1G043220/CsaV3_5G029850	2
BP	GO:0072511	divalent inorganic cation transport	100110	1599307	0.91043	0.999749	CsaV3_1G043220/CsaV3_5G029850	CsaV3_1G043220/CsaV3_5G029850	2
BP	GO:0006950	response to stress	90/2174	289/6278	0.910533	0.999749	CsaV3_1G003630/CsaV3_1G008250/CsaV3_1G010780/CsaV3_1G012650/CsaV3_1G031390/CsaV3_1G032850/CsaV3_1G033510/CsaV3_1G038240/CsaV3_1G038390/CsaV3_1G038400/CsaV3_1G038550/CsaV3_1G038690/CsaV3_1G038710/CsaV3_1G045200/CsaV3_2G001430/CsaV3_2G002320/CsaV3_2G003690/CsaV3_2G009350/CsaV3_2G014160/CsaV3_2G014760/CsaV3_2G019550/CsaV3_2G022190/CsaV3_2G030360/CsaV3_2G031500/CsaV3_2G035150/CsaV3_2G036450/CsaV3_3G0…	CsaV3_1G003630/CsaV3_1G008250/CsaV3_1G010780/CsaV3_1G012650/CsaV3_1G031390/CsaV3_1G032850/CsaV3_1G033510/CsaV3_1G038240/CsaV3_1G038390/CsaV3_1G038400/CsaV3_1G038550/CsaV3_1G038690/CsaV3_1G038710/CsaV3_1G045200/CsaV3_2G001430/CsaV3_2G002320/CsaV3_2G003690/CsaV3_2G009350/CsaV3_2G014160/CsaV3_2G014760/CsaV3_2G019550/CsaV3_2G022190/CsaV3_2G030360/CsaV3_2G031500/CsaV3_2G035150/CsaV3_2G036450/CsaV3_3G0…	90
BP	GO:0022900	electron transport chain	100138	14/6278	0.911881	0.999749	CsaV3_3G017590/CsaV3_5G030320/CsaV3_6G044180	CsaV3_3G017590/CsaV3_5G030320/CsaV3_6G044180	3
BP	GO:0045017	glycerolipid biosynthetic process	100138	14/6278	0.911881	0.999749	CsaV3_4G022060/CsaV3_5G028680/CsaV3_7G008480	CsaV3_4G022060/CsaV3_5G028680/CsaV3_7G008480	3
BP	GO:0065009	regulation of molecular function	100138	14/6278	0.911881	0.999749	CsaV3_2G005220/CsaV3_7G003000/CsaV3_7G028110	CsaV3_2G005220/CsaV3_7G003000/CsaV3_7G028110	3
BP	GO:0044265	cellular macromolecule catabolic process	15/2174	56/6278	0.918674	0.999749	CsaV3_1G046270/CsaV3_2G024370/CsaV3_2G028900/CsaV3_2G031230/CsaV3_3G019890/CsaV3_3G019900/CsaV3_3G032680/CsaV3_3G041550/CsaV3_4G032560/CsaV3_5G034230/CsaV3_5G034420/CsaV3_6G007200/CsaV3_6G014380/CsaV3_6G047290/CsaV3_7G003400	CsaV3_1G046270/CsaV3_2G024370/CsaV3_2G028900/CsaV3_2G031230/CsaV3_3G019890/CsaV3_3G019900/CsaV3_3G032680/CsaV3_3G041550/CsaV3_4G032560/CsaV3_5G034230/CsaV3_5G034420/CsaV3_6G007200/CsaV3_6G014380/CsaV3_6G047290/CsaV3_7G003400	15
BP	GO:0065008	regulation of biological quality	31/2174	109/6278	0.93126	0.999749	CsaV3_1G011310/CsaV3_1G012800/CsaV3_1G032050/CsaV3_1G032060/CsaV3_1G044160/CsaV3_1G044520/CsaV3_2G006740/CsaV3_2G009510/CsaV3_2G027800/CsaV3_2G033620/CsaV3_2G035050/CsaV3_3G038140/CsaV3_3G040410/CsaV3_3G043360/CsaV3_3G048400/CsaV3_4G033180/CsaV3_4G034020/CsaV3_5G001610/CsaV3_5G008640/CsaV3_5G010460/CsaV3_5G017500/CsaV3_5G027260/CsaV3_5G036690/CsaV3_5G039280/CsaV3_6G004830/CsaV3_6G015540/CsaV3_6G0…	CsaV3_1G011310/CsaV3_1G012800/CsaV3_1G032050/CsaV3_1G032060/CsaV3_1G044160/CsaV3_1G044520/CsaV3_2G006740/CsaV3_2G009510/CsaV3_2G027800/CsaV3_2G033620/CsaV3_2G035050/CsaV3_3G038140/CsaV3_3G040410/CsaV3_3G043360/CsaV3_3G048400/CsaV3_4G033180/CsaV3_4G034020/CsaV3_5G001610/CsaV3_5G008640/CsaV3_5G010460/CsaV3_5G017500/CsaV3_5G027260/CsaV3_5G036690/CsaV3_5G039280/CsaV3_6G004830/CsaV3_6G015540/CsaV3_6G0…	31
BP	GO:0009605	response to external stimulus	100138	15/6278	0.934878	0.999749	CsaV3_2G001430/CsaV3_2G022190/CsaV3_4G027610	CsaV3_2G001430/CsaV3_2G022190/CsaV3_4G027610	3
BP	GO:0009664	plant-type cell wall organization	100110	1599338	0.93656	0.999749	CsaV3_1G003410/CsaV3_7G000770	CsaV3_1G003410/CsaV3_7G000770	2
BP	GO:0050790	regulation of catalytic activity	100110	1599338	0.93656	0.999749	CsaV3_2G005220/CsaV3_7G028110	CsaV3_2G005220/CsaV3_7G028110	2
BP	GO:0071669	plant-type cell wall organization or biogenesis	100110	1599338	0.93656	0.999749	CsaV3_1G003410/CsaV3_7G000770	CsaV3_1G003410/CsaV3_7G000770	2
BP	GO:0006643	membrane lipid metabolic process	100169	19/6278	0.937184	0.999749	CsaV3_2G011410/CsaV3_4G022060/CsaV3_5G014080/CsaV3_6G006390	CsaV3_2G011410/CsaV3_4G022060/CsaV3_5G014080/CsaV3_6G006390	4
BP	GO:0001522	pseudouridine synthesis	100199	23/6278	0.941057	0.999749	CsaV3_1G000320/CsaV3_1G010950/CsaV3_4G037020/CsaV3_4G037060/CsaV3_6G004840	CsaV3_1G000320/CsaV3_1G010950/CsaV3_4G037020/CsaV3_4G037060/CsaV3_6G004840	5
BP	GO:0032501	multicellular organismal process	14/2174	55/6278	0.945863	0.999749	CsaV3_1G011640/CsaV3_1G011650/CsaV3_2G024750/CsaV3_3G001850/CsaV3_3G019890/CsaV3_3G019900/CsaV3_3G021760/CsaV3_3G038880/CsaV3_3G044200/CsaV3_4G030630/CsaV3_6G004740/CsaV3_6G007200/CsaV3_6G042260/CsaV3_6G049550	CsaV3_1G011640/CsaV3_1G011650/CsaV3_2G024750/CsaV3_3G001850/CsaV3_3G019890/CsaV3_3G019900/CsaV3_3G021760/CsaV3_3G038880/CsaV3_3G044200/CsaV3_4G030630/CsaV3_6G004740/CsaV3_6G007200/CsaV3_6G042260/CsaV3_6G049550	14
BP	GO:0006397	mRNA processing	100260	31/6278	0.949985	0.999749	CsaV3_1G004910/CsaV3_2G008750/CsaV3_4G025970/CsaV3_4G031200/CsaV3_6G008590/CsaV3_6G047890/CsaV3_7G025770	CsaV3_1G004910/CsaV3_2G008750/CsaV3_4G025970/CsaV3_4G031200/CsaV3_6G008590/CsaV3_6G047890/CsaV3_7G025770	7
BP	GO:0016071	mRNA metabolic process	100291	35/6278	0.954347	0.999749	CsaV3_1G004910/CsaV3_2G008750/CsaV3_4G025970/CsaV3_4G031200/CsaV3_6G008590/CsaV3_6G014380/CsaV3_6G047890/CsaV3_7G025770	CsaV3_1G004910/CsaV3_2G008750/CsaV3_4G025970/CsaV3_4G031200/CsaV3_6G008590/CsaV3_6G014380/CsaV3_6G047890/CsaV3_7G025770	8
BP	GO:1902600	proton transmembrane transport	100291	35/6278	0.954347	0.999749	CsaV3_1G005960/CsaV3_2G001570/CsaV3_2G031740/CsaV3_3G007840/CsaV3_3G010470/CsaV3_5G034810/CsaV3_5G036470/CsaV3_6G049050	CsaV3_1G005960/CsaV3_2G001570/CsaV3_2G031740/CsaV3_3G007840/CsaV3_3G010470/CsaV3_5G034810/CsaV3_5G036470/CsaV3_6G049050	8
BP	GO:0006022	aminoglycan metabolic process	100110	1599368	0.955342	0.999749	CsaV3_5G035760/CsaV3_6G047720	CsaV3_5G035760/CsaV3_6G047720	2
BP	GO:0016054	organic acid catabolic process	100110	1599368	0.955342	0.999749	CsaV3_1G012640/CsaV3_7G008280	CsaV3_1G012640/CsaV3_7G008280	2
BP	GO:0046395	carboxylic acid catabolic process	100110	1599368	0.955342	0.999749	CsaV3_1G012640/CsaV3_7G008280	CsaV3_1G012640/CsaV3_7G008280	2
BP	GO:0030258	lipid modification	100138	17/6278	0.965159	0.999749	CsaV3_1G044800/CsaV3_6G041580/CsaV3_7G025750	CsaV3_1G044800/CsaV3_6G041580/CsaV3_7G025750	3
BP	GO:0015672	monovalent inorganic cation transport	13/2174	55/6278	0.971962	0.999749	CsaV3_1G005960/CsaV3_1G010210/CsaV3_1G010220/CsaV3_1G036370/CsaV3_2G001570/CsaV3_2G031740/CsaV3_3G007840/CsaV3_3G010470/CsaV3_3G042200/CsaV3_5G010840/CsaV3_5G034810/CsaV3_5G036470/CsaV3_6G049050	CsaV3_1G005960/CsaV3_1G010210/CsaV3_1G010220/CsaV3_1G036370/CsaV3_2G001570/CsaV3_2G031740/CsaV3_3G007840/CsaV3_3G010470/CsaV3_3G042200/CsaV3_5G010840/CsaV3_5G034810/CsaV3_5G036470/CsaV3_6G049050	13
BP	GO:0034470	ncRNA processing	100383	48/6278	0.972319	0.999749	CsaV3_1G000640/CsaV3_2G014840/CsaV3_2G015360/CsaV3_2G031130/CsaV3_2G035640/CsaV3_3G009910/CsaV3_3G017360/CsaV3_3G035920/CsaV3_3G046940/CsaV3_5G005970/CsaV3_7G007700	CsaV3_1G000640/CsaV3_2G014840/CsaV3_2G015360/CsaV3_2G031130/CsaV3_2G035640/CsaV3_3G009910/CsaV3_3G017360/CsaV3_3G035920/CsaV3_3G046940/CsaV3_5G005970/CsaV3_7G007700	11
BP	GO:0009057	macromolecule catabolic process	19/2174	76/6278	0.973601	0.999749	CsaV3_1G046270/CsaV3_2G024370/CsaV3_2G028900/CsaV3_2G031230/CsaV3_3G002150/CsaV3_3G011520/CsaV3_3G019890/CsaV3_3G019900/CsaV3_3G032680/CsaV3_3G041550/CsaV3_4G032560/CsaV3_5G034230/CsaV3_5G034420/CsaV3_6G006240/CsaV3_6G007200/CsaV3_6G014380/CsaV3_6G047290/CsaV3_6G047720/CsaV3_7G003400	CsaV3_1G046270/CsaV3_2G024370/CsaV3_2G028900/CsaV3_2G031230/CsaV3_3G002150/CsaV3_3G011520/CsaV3_3G019890/CsaV3_3G019900/CsaV3_3G032680/CsaV3_3G041550/CsaV3_4G032560/CsaV3_5G034230/CsaV3_5G034420/CsaV3_6G006240/CsaV3_6G007200/CsaV3_6G014380/CsaV3_6G047290/CsaV3_6G047720/CsaV3_7G003400	19
BP	GO:0008033	tRNA processing	100230	30/6278	0.974663	0.999749	CsaV3_2G031130/CsaV3_2G035640/CsaV3_3G009910/CsaV3_3G017360/CsaV3_3G035920/CsaV3_5G005970	CsaV3_2G031130/CsaV3_2G035640/CsaV3_3G009910/CsaV3_3G017360/CsaV3_3G035920/CsaV3_5G005970	6
BP	GO:0006664	glycolipid metabolic process	100110	14/6278	0.978203	0.999749	CsaV3_4G022060/CsaV3_6G006390	CsaV3_4G022060/CsaV3_6G006390	2
BP	GO:1901136	carbohydrate derivative catabolic process	100110	14/6278	0.978203	0.999749	CsaV3_1G041450/CsaV3_6G047720	CsaV3_1G041450/CsaV3_6G047720	2
BP	GO:1903509	liposaccharide metabolic process	100110	14/6278	0.978203	0.999749	CsaV3_4G022060/CsaV3_6G006390	CsaV3_4G022060/CsaV3_6G006390	2
BP	GO:0042545	cell wall modification	100352	46/6278	0.98057	0.999749	CsaV3_1G009070/CsaV3_1G038620/CsaV3_2G018180/CsaV3_2G018190/CsaV3_3G019940/CsaV3_4G007260/CsaV3_5G004220/CsaV3_7G026200/CsaV3_7G029580/CsaV3_7G030240	CsaV3_1G009070/CsaV3_1G038620/CsaV3_2G018180/CsaV3_2G018190/CsaV3_3G019940/CsaV3_4G007260/CsaV3_5G004220/CsaV3_7G026200/CsaV3_7G029580/CsaV3_7G030240	10
BP	GO:0006979	response to oxidative stress	22/2174	88/6278	0.98073	0.999749	CsaV3_1G010780/CsaV3_1G012650/CsaV3_1G033510/CsaV3_2G014160/CsaV3_2G035150/CsaV3_3G035690/CsaV3_3G042040/CsaV3_3G042120/CsaV3_3G042140/CsaV3_3G047080/CsaV3_4G004610/CsaV3_4G023590/CsaV3_4G023640/CsaV3_4G023660/CsaV3_5G002900/CsaV3_6G002170/CsaV3_6G028510/CsaV3_6G034310/CsaV3_6G047320/CsaV3_6G047430/CsaV3_7G000930/CsaV3_7G028610	CsaV3_1G010780/CsaV3_1G012650/CsaV3_1G033510/CsaV3_2G014160/CsaV3_2G035150/CsaV3_3G035690/CsaV3_3G042040/CsaV3_3G042120/CsaV3_3G042140/CsaV3_3G047080/CsaV3_4G004610/CsaV3_4G023590/CsaV3_4G023640/CsaV3_4G023660/CsaV3_5G002900/CsaV3_6G002170/CsaV3_6G028510/CsaV3_6G034310/CsaV3_6G047320/CsaV3_6G047430/CsaV3_7G000930/CsaV3_7G028610	22
BP	GO:0006812	cation transport	55/2174	197/6278	0.982837	0.999749	CsaV3_1G000430/CsaV3_1G005960/CsaV3_1G010210/CsaV3_1G010220/CsaV3_1G015440/CsaV3_1G036370/CsaV3_1G039090/CsaV3_1G040300/CsaV3_1G042260/CsaV3_1G043220/CsaV3_2G001570/CsaV3_2G006610/CsaV3_2G008620/CsaV3_2G012160/CsaV3_2G018310/CsaV3_2G025560/CsaV3_2G031740/CsaV3_3G007840/CsaV3_3G010470/CsaV3_3G013710/CsaV3_3G032740/CsaV3_3G033490/CsaV3_3G034410/CsaV3_3G035980/CsaV3_3G042200/CsaV3_3G049960/CsaV3_4G0…	CsaV3_1G000430/CsaV3_1G005960/CsaV3_1G010210/CsaV3_1G010220/CsaV3_1G015440/CsaV3_1G036370/CsaV3_1G039090/CsaV3_1G040300/CsaV3_1G042260/CsaV3_1G043220/CsaV3_2G001570/CsaV3_2G006610/CsaV3_2G008620/CsaV3_2G012160/CsaV3_2G018310/CsaV3_2G025560/CsaV3_2G031740/CsaV3_3G007840/CsaV3_3G010470/CsaV3_3G013710/CsaV3_3G032740/CsaV3_3G033490/CsaV3_3G034410/CsaV3_3G035980/CsaV3_3G042200/CsaV3_3G049960/CsaV3_4G0…	55
[truncated: 429 more rows]

## Sheet: XN_20vsXN_10DAP GO
Category	GOID	Description	GeneRatio	BgRatio	pvalue	padj	geneID	geneName	Count	Up	Up_Gene_id	Down	Down_Gene_id
BP	GO:0046351	disaccharide biosynthetic process	6/366	15/5902	0.000169158	0.0458419	CsaV3_6G045560/CsaV3_3G001510/CsaV3_4G004750/CsaV3_UNG144090/CsaV3_1G001640/CsaV3_5G035080	CsaV3_6G045560/CsaV3_3G001510/CsaV3_4G004750/CsaV3_UNG144090/CsaV3_1G001640/CsaV3_5G035080	6	2	CsaV3_3G001510/CsaV3_5G035080	4	CsaV3_6G045560/CsaV3_4G004750/CsaV3_UNG144090/CsaV3_1G001640
[truncated: 42 more rows]

## Sheet: XN_30vsXN_20DAP GO
Category	GOID	Description	GeneRatio	BgRatio	pvalue	padj	geneID	geneName	Count	Up	Up_Gene_id	Down	Down_Gene_id
[truncated: 21 more rows]

## Sheet: XN_40vsXN_30DAP GO
Category	GOID	Description	GeneRatio	BgRatio	pvalue	padj	geneID	geneName	Count	Up	Up_Gene_id	Down	Down_Gene_id
[truncated: 33 more rows]

[truncated: 1 more sheets: COMMON shared XN GO]
