# Supplementary material for: Transcriptomic and Physiological Analyses Reveal Potential Genes Involved in Photoperiod-Regulated β-Carotene Accumulation Mechanisms in the Endocarp of Cucumber (Cucumis sativus L.) Fruit
Source: Int J Mol Sci. 2022 Oct 21;23(20):12650. doi: 10.3390/ijms232012650 (PMC9604348; doi:10.3390/ijms232012650)
Supplement: Supplementary file 1 [file ijms-23-12650-s001.zip › Supplementary Datasheet S4_KEGG enrichment analysis of differentially expressed genes between XS_vs XN pairwise comparisons.xlsx]

## Sheet: XS_10vsXN_10DAP KEGG
KEGGID	Description	GeneRatio	BgRatio	pvalue	padj	geneID	geneName	keggID	Count	Up	Up_Gene_names	Down	Down_Gene_names
csv03010	Ribosome	199/1838	281/4193	2.79548e-21	3.18685e-19	CsaV3_5G006380/CsaV3_6G016780/CsaV3_6G034270/CsaV3_1G013140/CsaV3_3G015690/CsaV3_4G004050/CsaV3_1G010160/CsaV3_4G032830/CsaV3_5G039260/CsaV3_6G050830/CsaV3_UNG232200/CsaV3_7G030740/CsaV3_1G014590/CsaV3_3G040630/CsaV3_2G030730/CsaV3_4G009970/CsaV3_3G032940/CsaV3_3G004770/CsaV3_5G005100/CsaV3_6G016380/CsaV3_6G048740/CsaV3_6G046990/CsaV3_5G031180/CsaV3_7G003660/CsaV3_2G035950/CsaV3_2G032350/CsaV3_4G…	CsaV3_5G006380/CsaV3_6G016780/CsaV3_6G034270/CsaV3_1G013140/CsaV3_3G015690/CsaV3_4G004050/CsaV3_1G010160/CsaV3_4G032830/CsaV3_5G039260/CsaV3_6G050830/CsaV3_UNG232200/CsaV3_7G030740/CsaV3_1G014590/CsaV3_3G040630/CsaV3_2G030730/CsaV3_4G009970/CsaV3_3G032940/CsaV3_3G004770/CsaV3_5G005100/CsaV3_6G016380/CsaV3_6G048740/CsaV3_6G046990/CsaV3_5G031180/CsaV3_7G003660/CsaV3_2G035950/CsaV3_2G032350/CsaV3_4G…	csv:101222172/csv:3429316/csv:101216990/csv:101216586/csv:101207433/csv:101223231/csv:101218390/csv:101204726/csv:101216482/csv:101216704/csv:101209853/csv:101210498/csv:3429295/csv:101205251/csv:101210722/csv:101209916/csv:101220973/csv:101218568/csv:101218701/csv:101210440/csv:101223158/csv:101204269/csv:101221117/csv:101220690/csv:101205390/csv:101220340/csv:101220655/csv:101213502/csv:1012085…	199	197	CsaV3_5G006380/CsaV3_6G016780/CsaV3_6G034270/CsaV3_1G013140/CsaV3_3G015690/CsaV3_4G004050/CsaV3_1G010160/CsaV3_4G032830/CsaV3_5G039260/CsaV3_6G050830/CsaV3_UNG232200/CsaV3_7G030740/CsaV3_1G014590/CsaV3_3G040630/CsaV3_2G030730/CsaV3_4G009970/CsaV3_3G032940/CsaV3_3G004770/CsaV3_5G005100/CsaV3_6G016380/CsaV3_6G048740/CsaV3_6G046990/CsaV3_5G031180/CsaV3_7G003660/CsaV3_2G035950/CsaV3_2G032350/CsaV3_4G…	2	CsaV3_3G031960/novel.992
csv03050	Proteasome	36/1838	48/4193	1.04065e-05	0.000593168	CsaV3_2G002590/CsaV3_4G025500/CsaV3_7G034340/CsaV3_7G003090/CsaV3_7G001120/CsaV3_1G009320/CsaV3_6G032330/CsaV3_3G013100/CsaV3_2G029040/CsaV3_3G000720/CsaV3_6G047290/CsaV3_4G032560/CsaV3_3G001250/CsaV3_4G031710/CsaV3_2G029050/CsaV3_5G039100/CsaV3_6G034220/CsaV3_1G046270/CsaV3_6G016920/CsaV3_3G000690/CsaV3_3G028620/CsaV3_3G034050/CsaV3_6G013170/CsaV3_2G028900/CsaV3_7G031810/CsaV3_6G021700/CsaV3_2G0…	CsaV3_2G002590/CsaV3_4G025500/CsaV3_7G034340/CsaV3_7G003090/CsaV3_7G001120/CsaV3_1G009320/CsaV3_6G032330/CsaV3_3G013100/CsaV3_2G029040/CsaV3_3G000720/CsaV3_6G047290/CsaV3_4G032560/CsaV3_3G001250/CsaV3_4G031710/CsaV3_2G029050/CsaV3_5G039100/CsaV3_6G034220/CsaV3_1G046270/CsaV3_6G016920/CsaV3_3G000690/CsaV3_3G028620/CsaV3_3G034050/CsaV3_6G013170/CsaV3_2G028900/CsaV3_7G031810/CsaV3_6G021700/CsaV3_2G0…	csv:101204697/csv:101209201/csv:101206046/csv:101206940/csv:101210117/csv:101212349/csv:101205512/csv:105434835/csv:101212516/csv:101217295/csv:101221038/csv:101221238/csv:101208086/csv:101219417/csv:101212754/csv:101212869/csv:101218171/csv:101218476/csv:101222090/csv:101218002/csv:101206724/csv:101215586/csv:101221619/csv:101215076/csv:101215578/csv:101212741/csv:101213616/csv:101213159/csv:101…	36	34	CsaV3_2G002590/CsaV3_4G025500/CsaV3_7G034340/CsaV3_7G003090/CsaV3_7G001120/CsaV3_1G009320/CsaV3_6G032330/CsaV3_3G013100/CsaV3_2G029040/CsaV3_3G000720/CsaV3_6G047290/CsaV3_4G032560/CsaV3_4G031710/CsaV3_2G029050/CsaV3_5G039100/CsaV3_6G034220/CsaV3_1G046270/CsaV3_6G016920/CsaV3_3G000690/CsaV3_3G028620/CsaV3_3G034050/CsaV3_6G013170/CsaV3_2G028900/CsaV3_7G031810/CsaV3_6G021700/CsaV3_2G017820/CsaV3_3G0…	2	CsaV3_3G001250/CsaV3_2G007490
csv03030	DNA replication	29/1838	41/4193	0.00042895	0.0163001	CsaV3_6G041210/CsaV3_6G014890/CsaV3_6G014300/CsaV3_4G031600/CsaV3_1G002970/CsaV3_6G016510/CsaV3_2G031270/CsaV3_1G006450/CsaV3_4G028050/CsaV3_4G033030/CsaV3_3G038830/CsaV3_2G016500/CsaV3_4G010360/CsaV3_3G046980/CsaV3_6G053180/CsaV3_6G051630/CsaV3_6G008170/CsaV3_5G005690/CsaV3_1G006150/CsaV3_5G008820/CsaV3_2G003500/CsaV3_3G003530/CsaV3_6G038660/CsaV3_5G039570/CsaV3_3G032880/CsaV3_5G035370/CsaV3_1G0…	CsaV3_6G041210/CsaV3_6G014890/CsaV3_6G014300/CsaV3_4G031600/CsaV3_1G002970/CsaV3_6G016510/CsaV3_2G031270/CsaV3_1G006450/CsaV3_4G028050/CsaV3_4G033030/CsaV3_3G038830/CsaV3_2G016500/CsaV3_4G010360/CsaV3_3G046980/CsaV3_6G053180/CsaV3_6G051630/CsaV3_6G008170/CsaV3_5G005690/CsaV3_1G006150/CsaV3_5G008820/CsaV3_2G003500/CsaV3_3G003530/CsaV3_6G038660/CsaV3_5G039570/CsaV3_3G032880/CsaV3_5G035370/CsaV3_1G0…	csv:101219332/csv:101208568/csv:101213447/csv:101221072/csv:101208545/csv:101208473/csv:101208210/csv:101210420/csv:101221224/csv:101202933/csv:101221438/csv:101211201/csv:101216298/csv:101220176/csv:101219775/csv:101210889/csv:101217274/csv:101209940/csv:101206268/csv:101213310/csv:101211822/csv:101208984/csv:101204361/csv:101203146/csv:101219546/csv:101205315/csv:101204273/csv:101210143/csv:101…	29	26	CsaV3_6G041210/CsaV3_6G014890/CsaV3_6G014300/CsaV3_4G031600/CsaV3_1G002970/CsaV3_6G016510/CsaV3_2G031270/CsaV3_1G006450/CsaV3_4G028050/CsaV3_4G033030/CsaV3_3G038830/CsaV3_2G016500/CsaV3_3G046980/CsaV3_6G053180/CsaV3_6G051630/CsaV3_6G008170/CsaV3_1G006150/CsaV3_5G008820/CsaV3_2G003500/CsaV3_3G003530/CsaV3_6G038660/CsaV3_5G039570/CsaV3_3G032880/CsaV3_5G035370/CsaV3_1G038240/CsaV3_4G003460	3	CsaV3_4G010360/CsaV3_5G005690/CsaV3_6G046400
csv03430	Mismatch repair	22/1838	32/4193	0.00378775	0.0966517	CsaV3_6G041210/CsaV3_6G014300/CsaV3_4G031600/CsaV3_1G002970/CsaV3_6G016510/CsaV3_1G006450/CsaV3_1G032850/CsaV3_4G028050/CsaV3_4G033030/CsaV3_3G038830/CsaV3_4G010360/CsaV3_3G046980/CsaV3_2G002320/CsaV3_5G005690/CsaV3_5G008820/CsaV3_3G003530/CsaV3_3G000200/CsaV3_6G038660/CsaV3_1G003630/CsaV3_7G029150/CsaV3_5G035370/CsaV3_6G046400	CsaV3_6G041210/CsaV3_6G014300/CsaV3_4G031600/CsaV3_1G002970/CsaV3_6G016510/CsaV3_1G006450/CsaV3_1G032850/CsaV3_4G028050/CsaV3_4G033030/CsaV3_3G038830/CsaV3_4G010360/CsaV3_3G046980/CsaV3_2G002320/CsaV3_5G005690/CsaV3_5G008820/CsaV3_3G003530/CsaV3_3G000200/CsaV3_6G038660/CsaV3_1G003630/CsaV3_7G029150/CsaV3_5G035370/CsaV3_6G046400	csv:101219332/csv:101213447/csv:101221072/csv:101208545/csv:101208473/csv:101210420/csv:101214177/csv:101221224/csv:101202933/csv:101221438/csv:101216298/csv:101220176/csv:101210755/csv:101209940/csv:101213310/csv:101208984/csv:101213777/csv:101204361/csv:101215589/csv:101210654/csv:101205315/csv:101218071	22	19	CsaV3_6G041210/CsaV3_6G014300/CsaV3_4G031600/CsaV3_1G002970/CsaV3_6G016510/CsaV3_1G006450/CsaV3_1G032850/CsaV3_4G028050/CsaV3_4G033030/CsaV3_3G038830/CsaV3_3G046980/CsaV3_2G002320/CsaV3_5G008820/CsaV3_3G003530/CsaV3_3G000200/CsaV3_6G038660/CsaV3_1G003630/CsaV3_7G029150/CsaV3_5G035370	3	CsaV3_4G010360/CsaV3_5G005690/CsaV3_6G046400
csv00061	Fatty acid biosynthesis	23/1838	34/4193	0.00423911	0.0966517	CsaV3_6G030990/CsaV3_3G043300/CsaV3_4G028240/CsaV3_4G023750/CsaV3_1G036540/CsaV3_5G002040/CsaV3_3G005890/CsaV3_1G032580/CsaV3_4G029830/CsaV3_2G010260/CsaV3_4G025950/CsaV3_5G003990/CsaV3_3G005880/CsaV3_1G041340/CsaV3_2G025310/CsaV3_6G015580/CsaV3_4G004790/CsaV3_1G030920/CsaV3_5G023610/CsaV3_6G001070/CsaV3_4G008750/CsaV3_2G003700/CsaV3_1G042350	CsaV3_6G030990/CsaV3_3G043300/CsaV3_4G028240/CsaV3_4G023750/CsaV3_1G036540/CsaV3_5G002040/CsaV3_3G005890/CsaV3_1G032580/CsaV3_4G029830/CsaV3_2G010260/CsaV3_4G025950/CsaV3_5G003990/CsaV3_3G005880/CsaV3_1G041340/CsaV3_2G025310/CsaV3_6G015580/CsaV3_4G004790/CsaV3_1G030920/CsaV3_5G023610/CsaV3_6G001070/CsaV3_4G008750/CsaV3_2G003700/CsaV3_1G042350	csv:101204316/csv:101205498/csv:101218462/csv:101210519/csv:101205913/csv:101209130/csv:101208501/csv:101210781/csv:101221707/csv:101217109/csv:101210209/csv:101215700/csv:101208501/csv:101213530/csv:101221932/csv:101220594/csv:101207195/csv:101210955/csv:101212380/csv:101212704/csv:101222930/csv:101207970/csv:101217385	23	19	CsaV3_6G030990/CsaV3_4G028240/CsaV3_4G023750/CsaV3_1G036540/CsaV3_3G005890/CsaV3_1G032580/CsaV3_4G029830/CsaV3_2G010260/CsaV3_4G025950/CsaV3_5G003990/CsaV3_3G005880/CsaV3_1G041340/CsaV3_2G025310/CsaV3_6G015580/CsaV3_4G004790/CsaV3_5G023610/CsaV3_4G008750/CsaV3_2G003700/CsaV3_1G042350	4	CsaV3_3G043300/CsaV3_5G002040/CsaV3_1G030920/CsaV3_6G001070
csv00780	Biotin metabolism	10/1838	837838	0.00621595	0.118103	CsaV3_1G031330/CsaV3_3G043300/CsaV3_4G023750/CsaV3_1G032580/CsaV3_1G041340/CsaV3_2G025310/CsaV3_6G015580/CsaV3_4G004790/CsaV3_5G001240/CsaV3_1G042350	CsaV3_1G031330/CsaV3_3G043300/CsaV3_4G023750/CsaV3_1G032580/CsaV3_1G041340/CsaV3_2G025310/CsaV3_6G015580/CsaV3_4G004790/CsaV3_5G001240/CsaV3_1G042350	csv:101216016/csv:101205498/csv:101210519/csv:101210781/csv:101213530/csv:101221932/csv:101220594/csv:101207195/csv:101213297/csv:101217385	10	9	CsaV3_1G031330/CsaV3_4G023750/CsaV3_1G032580/CsaV3_1G041340/CsaV3_2G025310/CsaV3_6G015580/CsaV3_4G004790/CsaV3_5G001240/CsaV3_1G042350	1	CsaV3_3G043300
csv04016	MAPK signaling pathway - plant	67/1838	123/4193	0.0103935	0.169266	CsaV3_3G008140/CsaV3_1G033530/CsaV3_4G030060/CsaV3_2G032070/CsaV3_3G022000/CsaV3_4G036080/CsaV3_1G004720/CsaV3_3G033350/CsaV3_1G042150/CsaV3_3G049190/CsaV3_5G000620/CsaV3_4G006090/CsaV3_4G026530/CsaV3_7G026460/CsaV3_3G001710/CsaV3_1G009350/CsaV3_2G005240/CsaV3_1G034580/CsaV3_6G052820/CsaV3_3G016530/CsaV3_3G033450/CsaV3_5G004750/CsaV3_3G031180/CsaV3_2G012870/CsaV3_6G004660/CsaV3_3G043720/CsaV3_6G0…	CsaV3_3G008140/CsaV3_1G033530/CsaV3_4G030060/CsaV3_2G032070/CsaV3_3G022000/CsaV3_4G036080/CsaV3_1G004720/CsaV3_3G033350/CsaV3_1G042150/CsaV3_3G049190/CsaV3_5G000620/CsaV3_4G006090/CsaV3_4G026530/CsaV3_7G026460/CsaV3_3G001710/CsaV3_1G009350/CsaV3_2G005240/CsaV3_1G034580/CsaV3_6G052820/CsaV3_3G016530/CsaV3_3G033450/CsaV3_5G004750/CsaV3_3G031180/CsaV3_2G012870/CsaV3_6G004660/CsaV3_3G043720/CsaV3_6G0…	csv:101211059/csv:101202796/csv:101209540/csv:101216639/csv:101208823/csv:101214398/csv:101207158/csv:101205651/csv:101206055/csv:101218875/csv:101221554/csv:101212728/csv:101216106/csv:101223223/csv:101205372/csv:101212831/csv:101209358/csv:101206871/csv:101205642/csv:101206634/csv:101206842/csv:101222716/csv:101219669/csv:101206564/csv:101215276/csv:101203499/csv:101217515/csv:101214396/csv:101…	67	13	CsaV3_4G036080/CsaV3_5G000620/CsaV3_1G009350/CsaV3_2G005240/CsaV3_5G002350/CsaV3_4G035580/CsaV3_5G002510/CsaV3_4G027680/CsaV3_2G002930/CsaV3_5G014240/CsaV3_3G007170/CsaV3_2G014200/CsaV3_7G007580	54	CsaV3_3G008140/CsaV3_1G033530/CsaV3_4G030060/CsaV3_2G032070/CsaV3_3G022000/CsaV3_1G004720/CsaV3_3G033350/CsaV3_1G042150/CsaV3_3G049190/CsaV3_4G006090/CsaV3_4G026530/CsaV3_7G026460/CsaV3_3G001710/CsaV3_1G034580/CsaV3_6G052820/CsaV3_3G016530/CsaV3_3G033450/CsaV3_5G004750/CsaV3_3G031180/CsaV3_2G012870/CsaV3_6G004660/CsaV3_3G043720/CsaV3_6G039650/CsaV3_6G004610/CsaV3_5G023410/CsaV3_7G006290/CsaV3_3G0…
csv04075	Plant hormone signal transduction	110/1838	216/4193	0.0187623	0.267362	CsaV3_1G031430/CsaV3_3G018080/CsaV3_1G031460/CsaV3_2G015370/CsaV3_3G008140/CsaV3_1G041270/CsaV3_4G030060/CsaV3_2G032070/CsaV3_5G024130/CsaV3_3G022000/CsaV3_7G022810/CsaV3_3G030830/CsaV3_7G000560/CsaV3_1G042150/CsaV3_3G049190/CsaV3_5G000620/CsaV3_4G026530/CsaV3_7G034270/CsaV3_6G003360/CsaV3_3G001710/CsaV3_1G034580/CsaV3_5G009010/CsaV3_1G014770/CsaV3_4G004890/CsaV3_5G024480/CsaV3_1G007260/CsaV3_4G0…	CsaV3_1G031430/CsaV3_3G018080/CsaV3_1G031460/CsaV3_2G015370/CsaV3_3G008140/CsaV3_1G041270/CsaV3_4G030060/CsaV3_2G032070/CsaV3_5G024130/CsaV3_3G022000/CsaV3_7G022810/CsaV3_3G030830/CsaV3_7G000560/CsaV3_1G042150/CsaV3_3G049190/CsaV3_5G000620/CsaV3_4G026530/CsaV3_7G034270/CsaV3_6G003360/CsaV3_3G001710/CsaV3_1G034580/CsaV3_5G009010/CsaV3_1G014770/CsaV3_4G004890/CsaV3_5G024480/CsaV3_1G007260/CsaV3_4G0…	csv:101217606/csv:101203475/csv:101217842/csv:101222974/csv:101211059/csv:101212154/csv:101209540/csv:101216639/csv:101213911/csv:101208823/csv:101213583/csv:101204473/csv:101203091/csv:101206055/csv:101218875/csv:101221554/csv:101216106/csv:101207496/csv:101210308/csv:101205372/csv:101206871/csv:101216829/csv:101204604/csv:101208419/csv:101210839/csv:101222222/csv:101211110/csv:101208419/csv:101…	110	22	CsaV3_2G015370/CsaV3_7G000560/CsaV3_5G000620/CsaV3_3G045710/CsaV3_4G002460/CsaV3_6G043720/CsaV3_2G027990/CsaV3_1G030930/CsaV3_7G025380/CsaV3_4G034710/CsaV3_3G045730/CsaV3_7G000710/CsaV3_7G000720/CsaV3_2G002930/CsaV3_6G004560/CsaV3_6G044680/CsaV3_2G015380/CsaV3_5G023170/CsaV3_7G000680/CsaV3_3G010190/CsaV3_2G014200/CsaV3_7G007580	88	CsaV3_1G031430/CsaV3_3G018080/CsaV3_1G031460/CsaV3_3G008140/CsaV3_1G041270/CsaV3_4G030060/CsaV3_2G032070/CsaV3_5G024130/CsaV3_3G022000/CsaV3_7G022810/CsaV3_3G030830/CsaV3_1G042150/CsaV3_3G049190/CsaV3_4G026530/CsaV3_7G034270/CsaV3_6G003360/CsaV3_3G001710/CsaV3_1G034580/CsaV3_5G009010/CsaV3_1G014770/CsaV3_4G004890/CsaV3_5G024480/CsaV3_1G007260/CsaV3_4G005980/CsaV3_UNG183410/CsaV3_3G016530/CsaV3_6G…
csv04626	Plant-pathogen interaction	76/1838	146/4193	0.0258005	0.301811	CsaV3_3G021210/CsaV3_1G033530/CsaV3_1G004290/CsaV3_3G032970/CsaV3_5G033780/CsaV3_1G004720/CsaV3_3G033350/CsaV3_5G037010/CsaV3_3G012800/CsaV3_4G003420/CsaV3_5G028160/CsaV3_7G026140/CsaV3_6G039330/CsaV3_1G000650/CsaV3_3G005930/CsaV3_7G008650/CsaV3_4G011890/CsaV3_3G003840/CsaV3_3G040820/CsaV3_3G031180/CsaV3_6G009480/CsaV3_1G014860/CsaV3_4G006200/CsaV3_2G029630/CsaV3_7G028550/novel.399/CsaV3_5G002350…	CsaV3_3G021210/CsaV3_1G033530/CsaV3_1G004290/CsaV3_3G032970/CsaV3_5G033780/CsaV3_1G004720/CsaV3_3G033350/CsaV3_5G037010/CsaV3_3G012800/CsaV3_4G003420/CsaV3_5G028160/CsaV3_7G026140/CsaV3_6G039330/CsaV3_1G000650/CsaV3_3G005930/CsaV3_7G008650/CsaV3_4G011890/CsaV3_3G003840/CsaV3_3G040820/CsaV3_3G031180/CsaV3_6G009480/CsaV3_1G014860/CsaV3_4G006200/CsaV3_2G029630/CsaV3_7G028550/-/CsaV3_5G002350/CsaV3_5…	csv:101218237/csv:101202796/csv:101220025/csv:101220738/csv:101207390/csv:101207158/csv:101205651/csv:101214558/csv:101220878/csv:101210877/csv:101212098/csv:101221990/csv:101212721/csv:101215508/csv:101207531/csv:101219869/csv:101208990/csv:101207853/csv:101207567/csv:101219669/csv:101220822/csv:101206440/csv:101213932/csv:101203607/csv:101217959/csv:101206736/csv:101212879/csv:101218538/csv:101…	76	23	CsaV3_5G028160/CsaV3_6G039330/CsaV3_3G003840/CsaV3_6G009480/CsaV3_4G006200/CsaV3_2G029630/CsaV3_7G028550/CsaV3_5G002350/CsaV3_1G001110/CsaV3_5G018740/CsaV3_1G038710/CsaV3_4G036210/CsaV3_5G005200/CsaV3_1G001870/CsaV3_5G002510/CsaV3_4G027680/CsaV3_1G038690/CsaV3_3G041910/CsaV3_4G027870/CsaV3_3G007660/CsaV3_3G043140/CsaV3_7G007580/CsaV3_3G028070	53	CsaV3_3G021210/CsaV3_1G033530/CsaV3_1G004290/CsaV3_3G032970/CsaV3_5G033780/CsaV3_1G004720/CsaV3_3G033350/CsaV3_5G037010/CsaV3_3G012800/CsaV3_4G003420/CsaV3_7G026140/CsaV3_1G000650/CsaV3_3G005930/CsaV3_7G008650/CsaV3_4G011890/CsaV3_3G040820/CsaV3_3G031180/CsaV3_1G014860/novel.399/CsaV3_5G023410/CsaV3_4G003590/CsaV3_3G027200/CsaV3_7G006290/CsaV3_5G028580/CsaV3_3G028060/CsaV3_3G043480/CsaV3_5G000590…
csv00030	Pentose phosphate pathway	28/1838	48/4193	0.0298512	0.301811	CsaV3_5G034910/CsaV3_6G006270/CsaV3_5G000220/CsaV3_5G033390/CsaV3_4G006330/CsaV3_3G009790/CsaV3_6G004010/CsaV3_3G036910/CsaV3_1G046070/CsaV3_6G048080/CsaV3_5G028690/CsaV3_4G002210/CsaV3_1G037750/CsaV3_5G005570/CsaV3_3G023460/CsaV3_4G037690/CsaV3_5G003980/CsaV3_6G040430/CsaV3_2G003650/CsaV3_1G016980/CsaV3_2G028640/CsaV3_5G038830/CsaV3_4G029990/CsaV3_6G048090/CsaV3_2G030420/CsaV3_2G004240/CsaV3_6G0…	CsaV3_5G034910/CsaV3_6G006270/CsaV3_5G000220/CsaV3_5G033390/CsaV3_4G006330/CsaV3_3G009790/CsaV3_6G004010/CsaV3_3G036910/CsaV3_1G046070/CsaV3_6G048080/CsaV3_5G028690/CsaV3_4G002210/CsaV3_1G037750/CsaV3_5G005570/CsaV3_3G023460/CsaV3_4G037690/CsaV3_5G003980/CsaV3_6G040430/CsaV3_2G003650/CsaV3_1G016980/CsaV3_2G028640/CsaV3_5G038830/CsaV3_4G029990/CsaV3_6G048090/CsaV3_2G030420/CsaV3_2G004240/CsaV3_6G0…	csv:101211316/csv:101206943/csv:101208410/csv:101210739/csv:101206171/csv:101215805/csv:101205576/csv:101209429/csv:101215219/csv:101211230/csv:101218080/csv:101205302/csv:101214374/csv:101209451/csv:101220704/csv:101208728/csv:101215470/csv:101209044/csv:101208699/csv:101223065/csv:101217944/csv:101209197/csv:101203574/csv:101211230/csv:101222586/csv:101221375/csv:101203616/csv:101211447	28	18	CsaV3_6G006270/CsaV3_4G006330/CsaV3_3G009790/CsaV3_3G036910/CsaV3_1G046070/CsaV3_5G028690/CsaV3_4G002210/CsaV3_1G037750/CsaV3_5G005570/CsaV3_4G037690/CsaV3_5G003980/CsaV3_6G040430/CsaV3_2G028640/CsaV3_5G038830/CsaV3_4G029990/CsaV3_2G030420/CsaV3_2G004240/CsaV3_6G048680	10	CsaV3_5G034910/CsaV3_5G000220/CsaV3_5G033390/CsaV3_6G004010/CsaV3_6G048080/CsaV3_3G023460/CsaV3_2G003650/CsaV3_1G016980/CsaV3_6G048090/CsaV3_4G025890
csv00500	Starch and sucrose metabolism	62/1838	118/4193	0.0333361	0.301811	CsaV3_3G044560/CsaV3_5G020420/CsaV3_1G004550/CsaV3_6G051060/CsaV3_2G033300/CsaV3_7G028580/CsaV3_6G031530/CsaV3_3G016150/CsaV3_1G032200/CsaV3_2G001510/CsaV3_3G036980/CsaV3_4G000970/CsaV3_1G001640/CsaV3_1G036000/CsaV3_7G021990/CsaV3_3G043060/CsaV3_6G006740/CsaV3_5G031700/CsaV3_7G005770/CsaV3_4G023300/CsaV3_2G014910/CsaV3_2G017550/CsaV3_6G000500/CsaV3_3G011520/CsaV3_3G021590/CsaV3_3G047730/CsaV3_3G0…	CsaV3_3G044560/CsaV3_5G020420/CsaV3_1G004550/CsaV3_6G051060/CsaV3_2G033300/CsaV3_7G028580/CsaV3_6G031530/CsaV3_3G016150/CsaV3_1G032200/CsaV3_2G001510/CsaV3_3G036980/CsaV3_4G000970/CsaV3_1G001640/CsaV3_1G036000/CsaV3_7G021990/CsaV3_3G043060/CsaV3_6G006740/CsaV3_5G031700/CsaV3_7G005770/CsaV3_4G023300/CsaV3_2G014910/CsaV3_2G017550/CsaV3_6G000500/CsaV3_3G011520/CsaV3_3G021590/CsaV3_3G047730/CsaV3_3G0…	csv:101215384/csv:101211461/csv:101204835/csv:101213082/csv:101220898/csv:101207395/csv:101215687/csv:101212172/csv:101205766/csv:101204456/csv:101210586/csv:101203847/csv:101209676/csv:101214999/csv:101205661/csv:101223112/csv:101213366/csv:101212688/csv:101209914/csv:101219168/csv:101208904/csv:101208819/csv:101203224/csv:101221739/csv:101213621/csv:101209348/csv:101215343/csv:101213925/csv:101…	62	34	CsaV3_1G004550/CsaV3_7G028580/CsaV3_6G031530/CsaV3_1G032200/CsaV3_2G001510/CsaV3_3G036980/CsaV3_4G000970/CsaV3_7G021990/CsaV3_4G023300/CsaV3_2G014910/CsaV3_2G017550/CsaV3_3G021590/CsaV3_3G047730/CsaV3_1G010740/CsaV3_2G024360/CsaV3_5G003450/CsaV3_5G028270/CsaV3_3G001510/CsaV3_4G006540/CsaV3_7G002310/CsaV3_5G005570/CsaV3_5G002050/CsaV3_4G008840/CsaV3_2G011150/CsaV3_3G037440/CsaV3_5G003970/CsaV3_3G0…	28	CsaV3_3G044560/CsaV3_5G020420/CsaV3_6G051060/CsaV3_2G033300/CsaV3_3G016150/CsaV3_1G001640/CsaV3_1G036000/CsaV3_3G043060/CsaV3_6G006740/CsaV3_5G031700/CsaV3_7G005770/CsaV3_6G000500/CsaV3_3G011520/CsaV3_3G040580/CsaV3_4G033920/CsaV3_2G001860/CsaV3_7G003840/CsaV3_5G033210/CsaV3_3G046790/CsaV3_1G022900/CsaV3_1G032890/CsaV3_4G007080/CsaV3_1G042470/CsaV3_6G051510/CsaV3_1G044130/CsaV3_4G037030/CsaV3_UNG…
csv00010	Glycolysis / Gluconeogenesis	61/1838	116/4193	0.0339368	0.301811	CsaV3_3G041600/CsaV3_1G004410/CsaV3_3G021780/CsaV3_4G013550/CsaV3_7G024120/CsaV3_6G013490/CsaV3_7G024950/CsaV3_6G031750/CsaV3_6G013500/CsaV3_1G032330/CsaV3_4G006350/CsaV3_2G013320/CsaV3_2G015690/CsaV3_6G004010/CsaV3_5G010390/CsaV3_3G036910/CsaV3_1G046070/CsaV3_5G031990/CsaV3_6G048080/CsaV3_4G005770/CsaV3_2G001860/CsaV3_5G028690/CsaV3_6G001210/CsaV3_4G026400/CsaV3_7G022930/CsaV3_5G034210/CsaV3_5G0…	CsaV3_3G041600/CsaV3_1G004410/CsaV3_3G021780/CsaV3_4G013550/CsaV3_7G024120/CsaV3_6G013490/CsaV3_7G024950/CsaV3_6G031750/CsaV3_6G013500/CsaV3_1G032330/CsaV3_4G006350/CsaV3_2G013320/CsaV3_2G015690/CsaV3_6G004010/CsaV3_5G010390/CsaV3_3G036910/CsaV3_1G046070/CsaV3_5G031990/CsaV3_6G048080/CsaV3_4G005770/CsaV3_2G001860/CsaV3_5G028690/CsaV3_6G001210/CsaV3_4G026400/CsaV3_7G022930/CsaV3_5G034210/CsaV3_5G0…	csv:101203750/csv:101222545/csv:101206887/csv:101217925/csv:101215151/csv:101203472/csv:101209854/csv:101212881/csv:101215670/csv:101204247/csv:101205699/csv:101218017/csv:101213372/csv:101205576/csv:101221482/csv:101209429/csv:101215219/csv:101208773/csv:101211230/csv:101207518/csv:101218300/csv:101218080/csv:101214545/csv:101217534/csv:101215513/csv:101220730/csv:101209451/csv:101220704/csv:101…	61	45	CsaV3_3G041600/CsaV3_1G004410/CsaV3_3G021780/CsaV3_4G013550/CsaV3_7G024120/CsaV3_6G013490/CsaV3_7G024950/CsaV3_6G013500/CsaV3_1G032330/CsaV3_2G013320/CsaV3_2G015690/CsaV3_5G010390/CsaV3_3G036910/CsaV3_1G046070/CsaV3_5G031990/CsaV3_4G005770/CsaV3_5G028690/CsaV3_6G001210/CsaV3_7G022930/CsaV3_5G034210/CsaV3_5G005570/CsaV3_7G024960/CsaV3_6G040390/CsaV3_4G017590/CsaV3_6G022400/CsaV3_4G037690/CsaV3_4G0…	16	CsaV3_6G031750/CsaV3_4G006350/CsaV3_6G004010/CsaV3_6G048080/CsaV3_2G001860/CsaV3_4G026400/CsaV3_3G023460/CsaV3_4G025310/CsaV3_5G010430/CsaV3_2G003650/CsaV3_3G048280/CsaV3_4G005260/CsaV3_6G048090/CsaV3_4G025890/novel.756/CsaV3_3G013930
csv01230	Biosynthesis of amino acids	103/1838	205/4193	0.034417	0.301811	CsaV3_5G034910/CsaV3_3G043270/CsaV3_6G006270/CsaV3_2G001290/CsaV3_6G001800/CsaV3_7G005980/CsaV3_6G000650/CsaV3_4G028640/CsaV3_5G039900/CsaV3_2G003740/CsaV3_6G014760/CsaV3_2G003300/CsaV3_4G014580/CsaV3_3G021780/CsaV3_4G013550/CsaV3_6G006290/CsaV3_1G014510/CsaV3_2G031570/CsaV3_3G035070/CsaV3_6G013490/CsaV3_2G017660/novel.389/CsaV3_7G018620/CsaV3_3G039680/CsaV3_2G013730/CsaV3_6G013500/CsaV3_6G001400…	CsaV3_5G034910/CsaV3_3G043270/CsaV3_6G006270/CsaV3_2G001290/CsaV3_6G001800/CsaV3_7G005980/CsaV3_6G000650/CsaV3_4G028640/CsaV3_5G039900/CsaV3_2G003740/CsaV3_6G014760/CsaV3_2G003300/CsaV3_4G014580/CsaV3_3G021780/CsaV3_4G013550/CsaV3_6G006290/CsaV3_1G014510/CsaV3_2G031570/CsaV3_3G035070/CsaV3_6G013490/CsaV3_2G017660/-/CsaV3_7G018620/CsaV3_3G039680/CsaV3_2G013730/CsaV3_6G013500/CsaV3_6G001400/CsaV3_5…	csv:101211316/csv:101222321/csv:101206943/csv:101208070/csv:101217107/csv:101213336/csv:101220896/csv:101215287/csv:101202843/csv:101207481/csv:101205753/csv:101214147/csv:101217452/csv:101206887/csv:101217925/csv:101207674/csv:101222151/csv:101203871/csv:101222699/csv:101203472/csv:101210546/csv:101220538/csv:101213467/csv:101212693/csv:101220215/csv:101215670/csv:101210588/csv:101202770/csv:101…	103	77	CsaV3_3G043270/CsaV3_6G006270/CsaV3_6G001800/CsaV3_7G005980/CsaV3_6G000650/CsaV3_5G039900/CsaV3_6G014760/CsaV3_2G003300/CsaV3_4G014580/CsaV3_3G021780/CsaV3_4G013550/CsaV3_6G006290/CsaV3_2G031570/CsaV3_3G035070/CsaV3_6G013490/novel.389/CsaV3_3G039680/CsaV3_2G013730/CsaV3_6G013500/CsaV3_6G001400/CsaV3_5G027250/CsaV3_4G027860/CsaV3_2G013320/CsaV3_2G015690/CsaV3_3G004760/CsaV3_3G009790/CsaV3_3G036910…	26	CsaV3_5G034910/CsaV3_2G001290/CsaV3_4G028640/CsaV3_2G003740/CsaV3_1G014510/CsaV3_2G017660/CsaV3_7G018620/CsaV3_UNG002020/novel.86/CsaV3_6G047800/CsaV3_1G045310/CsaV3_1G010970/CsaV3_6G048080/CsaV3_6G016090/CsaV3_3G023460/CsaV3_1G000550/CsaV3_5G023920/CsaV3_6G045310/CsaV3_5G031200/CsaV3_5G038370/CsaV3_2G017780/CsaV3_1G016980/CsaV3_6G048090/CsaV3_6G021500/CsaV3_2G029790/CsaV3_6G031510
csv00230	Purine metabolism	45/1838	84/4193	0.0445211	0.362529	CsaV3_1G010130/CsaV3_4G026330/CsaV3_4G031360/CsaV3_2G033180/CsaV3_1G009350/CsaV3_2G001510/CsaV3_5G002770/CsaV3_3G021780/CsaV3_5G035210/CsaV3_6G004900/CsaV3_1G042760/CsaV3_6G042080/CsaV3_3G027630/CsaV3_2G013320/CsaV3_6G019130/CsaV3_2G032170/CsaV3_5G003450/CsaV3_3G006560/CsaV3_2G026200/CsaV3_1G009500/CsaV3_5G030450/CsaV3_4G011640/CsaV3_5G001710/CsaV3_5G008870/CsaV3_5G005570/CsaV3_2G003460/CsaV3_2G0…	CsaV3_1G010130/CsaV3_4G026330/CsaV3_4G031360/CsaV3_2G033180/CsaV3_1G009350/CsaV3_2G001510/CsaV3_5G002770/CsaV3_3G021780/CsaV3_5G035210/CsaV3_6G004900/CsaV3_1G042760/CsaV3_6G042080/CsaV3_3G027630/CsaV3_2G013320/CsaV3_6G019130/CsaV3_2G032170/CsaV3_5G003450/CsaV3_3G006560/CsaV3_2G026200/CsaV3_1G009500/CsaV3_5G030450/CsaV3_4G011640/CsaV3_5G001710/CsaV3_5G008870/CsaV3_5G005570/CsaV3_2G003460/CsaV3_2G0…	csv:101218785/csv:101212419/csv:101202854/csv:101220975/csv:101212831/csv:101204456/csv:101217911/csv:101206887/csv:101206975/csv:101219321/csv:101211977/csv:101210105/csv:101222416/csv:101218017/csv:101218429/csv:101215432/csv:101208090/csv:101209253/csv:101208231/csv:101214286/csv:101209590/csv:101212263/csv:101203249/csv:101209967/csv:101209451/csv:101203230/csv:101203551/csv:101216029/csv:101…	45	30	CsaV3_4G031360/CsaV3_2G033180/CsaV3_1G009350/CsaV3_2G001510/CsaV3_5G002770/CsaV3_3G021780/CsaV3_5G035210/CsaV3_6G004900/CsaV3_6G042080/CsaV3_3G027630/CsaV3_2G013320/CsaV3_5G003450/CsaV3_3G006560/CsaV3_2G026200/CsaV3_1G009500/CsaV3_5G030450/CsaV3_5G001710/CsaV3_5G008870/CsaV3_5G005570/CsaV3_4G017590/CsaV3_6G021640/CsaV3_1G016950/CsaV3_5G029170/CsaV3_1G000690/CsaV3_6G040330/CsaV3_5G010490/CsaV3_3G0…	15	CsaV3_1G010130/CsaV3_4G026330/CsaV3_1G042760/CsaV3_6G019130/CsaV3_2G032170/CsaV3_4G011640/CsaV3_2G003460/CsaV3_2G010660/CsaV3_6G053020/CsaV3_UNG227950/CsaV3_5G004020/CsaV3_1G016980/CsaV3_3G012820/CsaV3_3G013810/CsaV3_2G015340
csv03410	Base excision repair	19/1838	33/4193	0.0781877	0.594227	CsaV3_6G041210/CsaV3_6G014890/CsaV3_6G014300/CsaV3_6G034200/CsaV3_6G016510/CsaV3_4G033030/CsaV3_5G031880/CsaV3_3G038830/CsaV3_4G010360/CsaV3_6G013350/CsaV3_5G005690/CsaV3_5G008820/CsaV3_6G046270/CsaV3_3G044900/CsaV3_7G031900/CsaV3_3G038650/CsaV3_1G038240/CsaV3_6G015040/CsaV3_1G008250	CsaV3_6G041210/CsaV3_6G014890/CsaV3_6G014300/CsaV3_6G034200/CsaV3_6G016510/CsaV3_4G033030/CsaV3_5G031880/CsaV3_3G038830/CsaV3_4G010360/CsaV3_6G013350/CsaV3_5G005690/CsaV3_5G008820/CsaV3_6G046270/CsaV3_3G044900/CsaV3_7G031900/CsaV3_3G038650/CsaV3_1G038240/CsaV3_6G015040/CsaV3_1G008250	csv:101219332/csv:101208568/csv:101213447/csv:101219118/csv:101208473/csv:101202933/csv:101209170/csv:101221438/csv:101216298/csv:101218536/csv:101209940/csv:101213310/csv:101219253/csv:101206397/csv:101205558/csv:101219786/csv:101204273/csv:101203672/csv:101219928	19	13	CsaV3_6G041210/CsaV3_6G014890/CsaV3_6G014300/CsaV3_6G034200/CsaV3_6G016510/CsaV3_4G033030/CsaV3_5G031880/CsaV3_3G038830/CsaV3_5G008820/CsaV3_7G031900/CsaV3_3G038650/CsaV3_1G038240/CsaV3_1G008250	6	CsaV3_4G010360/CsaV3_6G013350/CsaV3_5G005690/CsaV3_6G046270/CsaV3_3G044900/CsaV3_6G015040
csv00195	Photosynthesis	27/1838	52/4193	0.148733	0.99997	CsaV3_2G010090/CsaV3_6G042680/CsaV3_6G052330/CsaV3_2G009680/CsaV3_6G041600/CsaV3_3G049310/CsaV3_6G034480/CsaV3_3G013320/CsaV3_1G015100/CsaV3_3G046150/CsaV3_3G013420/CsaV3_6G007340/CsaV3_6G002740/CsaV3_6G052210/CsaV3_1G011330/CsaV3_7G004300/CsaV3_1G010750/CsaV3_1G025480/CsaV3_1G046680/CsaV3_UNG203700/CsaV3_5G026220/CsaV3_4G007520/CsaV3_UNG201530/CsaV3_6G053010/CsaV3_4G007600/CsaV3_3G004330/CsaV3_3…	CsaV3_2G010090/CsaV3_6G042680/CsaV3_6G052330/CsaV3_2G009680/CsaV3_6G041600/CsaV3_3G049310/CsaV3_6G034480/CsaV3_3G013320/CsaV3_1G015100/CsaV3_3G046150/CsaV3_3G013420/CsaV3_6G007340/CsaV3_6G002740/CsaV3_6G052210/CsaV3_1G011330/CsaV3_7G004300/CsaV3_1G010750/CsaV3_1G025480/CsaV3_1G046680/CsaV3_UNG203700/CsaV3_5G026220/CsaV3_4G007520/CsaV3_UNG201530/CsaV3_6G053010/CsaV3_4G007600/CsaV3_3G004330/CsaV3_3…	csv:101203850/csv:101203080/csv:101216935/csv:101208674/csv:101204396/csv:101221013/csv:101206477/csv:101206257/csv:101209111/csv:101211484/csv:101207214/csv:101207167/csv:101211740/csv:101209832/csv:101209135/csv:101204833/csv:101214408/csv:3429275/csv:101215480/csv:3429375/csv:101220312/csv:101214094/csv:3429270/csv:101222612/csv:101215781/csv:101218641/csv:101223219	27	25	CsaV3_2G010090/CsaV3_6G042680/CsaV3_6G052330/CsaV3_2G009680/CsaV3_6G041600/CsaV3_3G049310/CsaV3_6G034480/CsaV3_3G013320/CsaV3_1G015100/CsaV3_3G046150/CsaV3_3G013420/CsaV3_6G007340/CsaV3_6G002740/CsaV3_6G052210/CsaV3_1G011330/CsaV3_7G004300/CsaV3_1G025480/CsaV3_1G046680/CsaV3_UNG203700/CsaV3_5G026220/CsaV3_4G007520/CsaV3_UNG201530/CsaV3_4G007600/CsaV3_3G004330/CsaV3_3G025000	2	CsaV3_1G010750/CsaV3_6G053010
csv00650	Butanoate metabolism	13/1838	23/4193	0.154172	0.99997	CsaV3_4G007380/CsaV3_4G032320/CsaV3_6G013440/CsaV3_4G007370/CsaV3_5G017320/CsaV3_5G014210/CsaV3_5G017290/CsaV3_1G000550/CsaV3_1G044260/CsaV3_1G005000/CsaV3_6G038810/CsaV3_3G003490/CsaV3_5G020650	CsaV3_4G007380/CsaV3_4G032320/CsaV3_6G013440/CsaV3_4G007370/CsaV3_5G017320/CsaV3_5G014210/CsaV3_5G017290/CsaV3_1G000550/CsaV3_1G044260/CsaV3_1G005000/CsaV3_6G038810/CsaV3_3G003490/CsaV3_5G020650	csv:101220932/csv:101219660/csv:101217352/csv:101211530/csv:101214676/csv:101212902/csv:101208026/csv:101213339/csv:101208212/csv:101210903/csv:101203798/csv:101208259/csv:101216119	13	7	CsaV3_6G013440/CsaV3_5G017320/CsaV3_5G014210/CsaV3_1G044260/CsaV3_1G005000/CsaV3_3G003490/CsaV3_5G020650	6	CsaV3_4G007380/CsaV3_4G032320/CsaV3_4G007370/CsaV3_5G017290/CsaV3_1G000550/CsaV3_6G038810
csv00860	Porphyrin and chlorophyll metabolism	23/1838	44/4193	0.163188	0.99997	CsaV3_6G001080/CsaV3_6G050640/CsaV3_4G007220/CsaV3_4G031720/CsaV3_6G012280/CsaV3_5G003370/CsaV3_3G031800/CsaV3_2G025670/CsaV3_5G010770/CsaV3_5G018640/CsaV3_7G007370/CsaV3_4G033870/CsaV3_2G030530/CsaV3_7G007260/CsaV3_1G038230/CsaV3_4G026340/CsaV3_1G002370/CsaV3_2G028140/CsaV3_3G014130/CsaV3_4G008050/CsaV3_7G031380/CsaV3_4G011730/CsaV3_1G000080	CsaV3_6G001080/CsaV3_6G050640/CsaV3_4G007220/CsaV3_4G031720/CsaV3_6G012280/CsaV3_5G003370/CsaV3_3G031800/CsaV3_2G025670/CsaV3_5G010770/CsaV3_5G018640/CsaV3_7G007370/CsaV3_4G033870/CsaV3_2G030530/CsaV3_7G007260/CsaV3_1G038230/CsaV3_4G026340/CsaV3_1G002370/CsaV3_2G028140/CsaV3_3G014130/CsaV3_4G008050/CsaV3_7G031380/CsaV3_4G011730/CsaV3_1G000080	csv:101213181/csv:101217637/csv:101209548/csv:101219179/csv:101210597/csv:101206296/csv:101219749/csv:101216568/csv:101212245/csv:101214667/csv:101208135/csv:101208554/csv:101220615/csv:101207399/csv:101218513/csv:101212175/csv:101221755/csv:101203770/csv:101218189/csv:101212208/csv:101222061/csv:101213619/csv:101206600	23	20	CsaV3_6G001080/CsaV3_6G050640/CsaV3_4G007220/CsaV3_4G031720/CsaV3_6G012280/CsaV3_3G031800/CsaV3_5G010770/CsaV3_5G018640/CsaV3_4G033870/CsaV3_2G030530/CsaV3_7G007260/CsaV3_1G038230/CsaV3_4G026340/CsaV3_1G002370/CsaV3_2G028140/CsaV3_3G014130/CsaV3_4G008050/CsaV3_7G031380/CsaV3_4G011730/CsaV3_1G000080	3	CsaV3_5G003370/CsaV3_2G025670/CsaV3_7G007370
csv04130	SNARE interactions in vesicular transport	18/1838	34/4193	0.183554	0.99997	CsaV3_3G038070/CsaV3_2G035100/CsaV3_3G022610/CsaV3_3G047800/CsaV3_3G046300/CsaV3_3G004560/CsaV3_3G041240/CsaV3_3G030880/CsaV3_1G027860/CsaV3_6G001590/CsaV3_5G008320/CsaV3_7G029670/CsaV3_4G029820/CsaV3_4G002040/CsaV3_4G013350/CsaV3_6G021780/CsaV3_7G034220/CsaV3_5G008990	CsaV3_3G038070/CsaV3_2G035100/CsaV3_3G022610/CsaV3_3G047800/CsaV3_3G046300/CsaV3_3G004560/CsaV3_3G041240/CsaV3_3G030880/CsaV3_1G027860/CsaV3_6G001590/CsaV3_5G008320/CsaV3_7G029670/CsaV3_4G029820/CsaV3_4G002040/CsaV3_4G013350/CsaV3_6G021780/CsaV3_7G034220/CsaV3_5G008990	csv:101208931/csv:101214355/csv:101218891/csv:101207709/csv:101209595/csv:101223140/csv:101213977/csv:101208227/csv:101208350/csv:101207161/csv:101217145/csv:101204192/csv:101221937/csv:101207624/csv:101220775/csv:101211289/csv:101208227/csv:101213786	18	9	CsaV3_2G035100/CsaV3_3G004560/CsaV3_1G027860/CsaV3_6G001590/CsaV3_4G029820/CsaV3_4G013350/CsaV3_6G021780/CsaV3_7G034220/CsaV3_5G008990	9	CsaV3_3G038070/CsaV3_3G022610/CsaV3_3G047800/CsaV3_3G046300/CsaV3_3G041240/CsaV3_3G030880/CsaV3_5G008320/CsaV3_7G029670/CsaV3_4G002040
csv00020	Citrate cycle (TCA cycle)	25/1838	49/4193	0.190537	0.99997	CsaV3_5G026370/CsaV3_7G024120/CsaV3_7G028870/CsaV3_5G027250/CsaV3_1G032330/CsaV3_5G031990/CsaV3_6G031980/CsaV3_1G007500/CsaV3_5G034210/CsaV3_5G007980/CsaV3_6G007490/CsaV3_2G012760/CsaV3_4G001010/CsaV3_6G022400/CsaV3_4G005080/CsaV3_UNG208730/CsaV3_7G003590/CsaV3_6G000070/CsaV3_2G024770/CsaV3_3G048280/CsaV3_4G008360/CsaV3_6G036340/CsaV3_1G002350/CsaV3_1G038000/novel.756	CsaV3_5G026370/CsaV3_7G024120/CsaV3_7G028870/CsaV3_5G027250/CsaV3_1G032330/CsaV3_5G031990/CsaV3_6G031980/CsaV3_1G007500/CsaV3_5G034210/CsaV3_5G007980/CsaV3_6G007490/CsaV3_2G012760/CsaV3_4G001010/CsaV3_6G022400/CsaV3_4G005080/CsaV3_UNG208730/CsaV3_7G003590/CsaV3_6G000070/CsaV3_2G024770/CsaV3_3G048280/CsaV3_4G008360/CsaV3_6G036340/CsaV3_1G002350/CsaV3_1G038000/-	csv:101208883/csv:101215151/csv:101214377/csv:101202770/csv:101204247/csv:101208773/csv:101209539/csv:101206269/csv:101220730/csv:101222022/csv:101205496/csv:101204387/csv:101203115/csv:101209306/csv:101211616/csv:11123870/csv:101221392/csv:101207718/csv:101209126/csv:101222382/csv:101207078/csv:101205918/csv:101213903/csv:101216462/csv:101220981	25	21	CsaV3_7G024120/CsaV3_7G028870/CsaV3_5G027250/CsaV3_1G032330/CsaV3_5G031990/CsaV3_6G031980/CsaV3_1G007500/CsaV3_5G034210/CsaV3_5G007980/CsaV3_6G007490/CsaV3_2G012760/CsaV3_4G001010/CsaV3_6G022400/CsaV3_4G005080/CsaV3_7G003590/CsaV3_6G000070/CsaV3_2G024770/CsaV3_4G008360/CsaV3_6G036340/CsaV3_1G002350/CsaV3_1G038000	4	CsaV3_5G026370/CsaV3_UNG208730/CsaV3_3G048280/novel.756
csv00600	Sphingolipid metabolism	12/1838	22/4193	0.211334	0.99997	CsaV3_6G048550/CsaV3_5G014080/CsaV3_5G039980/CsaV3_2G026490/CsaV3_6G031740/CsaV3_1G035880/CsaV3_5G032610/CsaV3_3G043840/CsaV3_2G010670/CsaV3_5G036760/CsaV3_3G013580/CsaV3_1G000200	CsaV3_6G048550/CsaV3_5G014080/CsaV3_5G039980/CsaV3_2G026490/CsaV3_6G031740/CsaV3_1G035880/CsaV3_5G032610/CsaV3_3G043840/CsaV3_2G010670/CsaV3_5G036760/CsaV3_3G013580/CsaV3_1G000200	csv:101205550/csv:101212019/csv:101204709/csv:101204467/csv:101206698/csv:101209656/csv:101206018/csv:101204972/csv:101203795/csv:101217833/csv:101208848/csv:101209026	12	3	CsaV3_1G035880/CsaV3_3G043840/CsaV3_5G036760	9	CsaV3_6G048550/CsaV3_5G014080/CsaV3_5G039980/CsaV3_2G026490/CsaV3_6G031740/CsaV3_5G032610/CsaV3_2G010670/CsaV3_3G013580/CsaV3_1G000200
csv00250	Alanine, aspartate and glutamate metabolism	27/1838	54/4193	0.216909	0.99997	CsaV3_4G034720/CsaV3_4G007380/CsaV3_4G031360/CsaV3_4G032320/CsaV3_6G013440/CsaV3_3G004920/CsaV3_4G007370/CsaV3_1G043170/CsaV3_1G039010/CsaV3_5G005130/CsaV3_5G017320/CsaV3_4G027010/CsaV3_5G008870/CsaV3_4G013280/CsaV3_2G032340/CsaV3_6G016090/CsaV3_1G007880/CsaV3_5G017290/CsaV3_2G010560/CsaV3_5G023920/CsaV3_5G031200/CsaV3_1G005000/CsaV3_3G031010/CsaV3_3G047990/CsaV3_5G029640/CsaV3_5G020650/CsaV3_2G0…	CsaV3_4G034720/CsaV3_4G007380/CsaV3_4G031360/CsaV3_4G032320/CsaV3_6G013440/CsaV3_3G004920/CsaV3_4G007370/CsaV3_1G043170/CsaV3_1G039010/CsaV3_5G005130/CsaV3_5G017320/CsaV3_4G027010/CsaV3_5G008870/CsaV3_4G013280/CsaV3_2G032340/CsaV3_6G016090/CsaV3_1G007880/CsaV3_5G017290/CsaV3_2G010560/CsaV3_5G023920/CsaV3_5G031200/CsaV3_1G005000/CsaV3_3G031010/CsaV3_3G047990/CsaV3_5G029640/CsaV3_5G020650/CsaV3_2G0…	csv:101218064/csv:101220932/csv:101202854/csv:101219660/csv:101217352/csv:101220705/csv:101211530/csv:101217893/csv:101208927/csv:101218466/csv:101214676/csv:101209562/csv:101209967/csv:101221948/csv:101213342/csv:101214250/csv:101214440/csv:101208026/csv:101222628/csv:101215515/csv:101213570/csv:101210903/csv:101207254/csv:101205167/csv:101222857/csv:101216119/csv:101203840	27	14	CsaV3_4G031360/CsaV3_6G013440/CsaV3_3G004920/CsaV3_5G017320/CsaV3_4G027010/CsaV3_5G008870/CsaV3_4G013280/CsaV3_2G032340/CsaV3_2G010560/CsaV3_1G005000/CsaV3_3G031010/CsaV3_3G047990/CsaV3_5G029640/CsaV3_5G020650	13	CsaV3_4G034720/CsaV3_4G007380/CsaV3_4G032320/CsaV3_4G007370/CsaV3_1G043170/CsaV3_1G039010/CsaV3_5G005130/CsaV3_6G016090/CsaV3_1G007880/CsaV3_5G017290/CsaV3_5G023920/CsaV3_5G031200/CsaV3_2G015340
csv00511	Other glycan degradation	9/1838	16/4193	0.22569	0.99997	CsaV3_5G014080/CsaV3_3G032600/CsaV3_5G039980/CsaV3_2G009420/CsaV3_3G043840/CsaV3_5G036760/CsaV3_5G010510/CsaV3_3G018140/CsaV3_6G047280	CsaV3_5G014080/CsaV3_3G032600/CsaV3_5G039980/CsaV3_2G009420/CsaV3_3G043840/CsaV3_5G036760/CsaV3_5G010510/CsaV3_3G018140/CsaV3_6G047280	csv:101212019/csv:101211123/csv:101204709/csv:101211792/csv:101204972/csv:101217833/csv:101203587/csv:101204534/csv:101221354	9	7	CsaV3_3G032600/CsaV3_2G009420/CsaV3_3G043840/CsaV3_5G036760/CsaV3_5G010510/CsaV3_3G018140/CsaV3_6G047280	2	CsaV3_5G014080/CsaV3_5G039980
csv00300	Lysine biosynthesis	6/1838	837777	0.237087	0.99997	CsaV3_5G039900/CsaV3_4G014580/CsaV3_2G014950/CsaV3_5G014440/CsaV3_7G021780/CsaV3_4G024670	CsaV3_5G039900/CsaV3_4G014580/CsaV3_2G014950/CsaV3_5G014440/CsaV3_7G021780/CsaV3_4G024670	csv:101202843/csv:101217452/csv:101208417/csv:101206329/csv:101222467/csv:101218612	6	6	CsaV3_5G039900/CsaV3_4G014580/CsaV3_2G014950/CsaV3_5G014440/CsaV3_7G021780/CsaV3_4G024670	0
csv01212	Fatty acid metabolism	32/1838	66/4193	0.259514	0.99997	CsaV3_6G030990/CsaV3_3G043300/CsaV3_4G028240/CsaV3_4G023750/CsaV3_1G036540/CsaV3_5G002040/CsaV3_3G005890/CsaV3_1G032580/CsaV3_3G002510/CsaV3_4G029830/CsaV3_2G010260/CsaV3_4G025950/CsaV3_5G003990/CsaV3_3G005880/CsaV3_1G041340/CsaV3_2G025310/CsaV3_6G015580/CsaV3_3G006860/CsaV3_6G022310/CsaV3_4G004790/CsaV3_1G030920/CsaV3_3G028760/CsaV3_3G038870/CsaV3_5G023610/CsaV3_2G011380/CsaV3_5G004490/CsaV3_6G0…	CsaV3_6G030990/CsaV3_3G043300/CsaV3_4G028240/CsaV3_4G023750/CsaV3_1G036540/CsaV3_5G002040/CsaV3_3G005890/CsaV3_1G032580/CsaV3_3G002510/CsaV3_4G029830/CsaV3_2G010260/CsaV3_4G025950/CsaV3_5G003990/CsaV3_3G005880/CsaV3_1G041340/CsaV3_2G025310/CsaV3_6G015580/CsaV3_3G006860/CsaV3_6G022310/CsaV3_4G004790/CsaV3_1G030920/CsaV3_3G028760/CsaV3_3G038870/CsaV3_5G023610/CsaV3_2G011380/CsaV3_5G004490/CsaV3_6G0…	csv:101204316/csv:101205498/csv:101218462/csv:101210519/csv:101205913/csv:101209130/csv:101208501/csv:101210781/csv:101212007/csv:101221707/csv:101217109/csv:101210209/csv:101215700/csv:101208501/csv:101213530/csv:101221932/csv:101220594/csv:101214048/csv:101210295/csv:101207195/csv:101210955/csv:101208182/csv:101222623/csv:101212380/csv:101212301/csv:101222043/csv:101212704/csv:101222930/csv:101…	32	25	CsaV3_6G030990/CsaV3_4G028240/CsaV3_4G023750/CsaV3_1G036540/CsaV3_3G005890/CsaV3_1G032580/CsaV3_4G029830/CsaV3_2G010260/CsaV3_4G025950/CsaV3_5G003990/CsaV3_3G005880/CsaV3_1G041340/CsaV3_2G025310/CsaV3_6G015580/CsaV3_3G006860/CsaV3_4G004790/CsaV3_3G028760/CsaV3_3G038870/CsaV3_5G023610/CsaV3_5G004490/CsaV3_4G008750/CsaV3_6G024070/CsaV3_2G003700/CsaV3_1G042350/CsaV3_5G030680	7	CsaV3_3G043300/CsaV3_5G002040/CsaV3_3G002510/CsaV3_6G022310/CsaV3_1G030920/CsaV3_2G011380/CsaV3_6G001070
csv04712	Circadian rhythm - plant	15/1838	30/4193	0.307487	0.99997	CsaV3_1G044210/CsaV3_3G027830/CsaV3_5G014370/CsaV3_6G008360/CsaV3_3G047490/CsaV3_7G024490/CsaV3_5G002160/CsaV3_7G034990/CsaV3_1G045940/CsaV3_7G002530/CsaV3_3G046530/CsaV3_5G006010/CsaV3_5G000090/CsaV3_6G005020/CsaV3_3G015190	CsaV3_1G044210/CsaV3_3G027830/CsaV3_5G014370/CsaV3_6G008360/CsaV3_3G047490/CsaV3_7G024490/CsaV3_5G002160/CsaV3_7G034990/CsaV3_1G045940/CsaV3_7G002530/CsaV3_3G046530/CsaV3_5G006010/CsaV3_5G000090/CsaV3_6G005020/CsaV3_3G015190	csv:101207969/csv:101205211/csv:101222712/csv:101214878/csv:101213649/csv:101216952/csv:101211350/csv:101208149/csv:101203654/csv:101211915/csv:101205952/csv:101206050/csv:101209788/csv:101220984/csv:101212197	15	6	CsaV3_3G027830/CsaV3_5G014370/CsaV3_7G024490/CsaV3_1G045940/CsaV3_5G000090/CsaV3_3G015190	9	CsaV3_1G044210/CsaV3_6G008360/CsaV3_3G047490/CsaV3_5G002160/CsaV3_7G034990/CsaV3_7G002530/CsaV3_3G046530/CsaV3_5G006010/CsaV3_6G005020
csv00400	Phenylalanine, tyrosine and tryptophan biosynthesis	20/1838	41/4193	0.312995	0.99997	CsaV3_3G043270/CsaV3_6G001800/CsaV3_6G014760/CsaV3_2G003300/CsaV3_1G014510/CsaV3_2G017660/CsaV3_2G013730/CsaV3_3G004760/CsaV3_1G010970/CsaV3_4G027010/CsaV3_2G032340/CsaV3_6G042130/CsaV3_1G044710/CsaV3_6G045310/CsaV3_5G038370/CsaV3_5G010220/CsaV3_2G017780/CsaV3_3G009780/CsaV3_6G021500/CsaV3_2G029790	CsaV3_3G043270/CsaV3_6G001800/CsaV3_6G014760/CsaV3_2G003300/CsaV3_1G014510/CsaV3_2G017660/CsaV3_2G013730/CsaV3_3G004760/CsaV3_1G010970/CsaV3_4G027010/CsaV3_2G032340/CsaV3_6G042130/CsaV3_1G044710/CsaV3_6G045310/CsaV3_5G038370/CsaV3_5G010220/CsaV3_2G017780/CsaV3_3G009780/CsaV3_6G021500/CsaV3_2G029790	csv:101222321/csv:101217107/csv:101205753/csv:101214147/csv:101222151/csv:101210546/csv:101220215/csv:101218330/csv:101208895/csv:101209562/csv:101213342/csv:101209860/csv:101220286/csv:101207177/csv:101203315/csv:101202863/csv:101213380/csv:101215568/csv:101217934/csv:101220636	20	12	CsaV3_3G043270/CsaV3_6G001800/CsaV3_6G014760/CsaV3_2G003300/CsaV3_2G013730/CsaV3_3G004760/CsaV3_4G027010/CsaV3_2G032340/CsaV3_6G042130/CsaV3_1G044710/CsaV3_5G010220/CsaV3_3G009780	8	CsaV3_1G014510/CsaV3_2G017660/CsaV3_1G010970/CsaV3_6G045310/CsaV3_5G038370/CsaV3_2G017780/CsaV3_6G021500/CsaV3_2G029790
csv03420	Nucleotide excision repair	25/1838	52/4193	0.314364	0.99997	CsaV3_6G041210/CsaV3_6G014890/CsaV3_6G014300/CsaV3_4G031600/CsaV3_1G002970/CsaV3_6G016510/CsaV3_5G002620/CsaV3_3G005500/CsaV3_4G028050/CsaV3_4G033030/CsaV3_3G005850/CsaV3_3G038830/CsaV3_6G012270/CsaV3_4G010360/CsaV3_3G046980/CsaV3_5G005690/CsaV3_5G008820/CsaV3_3G032680/CsaV3_3G003530/CsaV3_6G038660/CsaV3_3G022110/CsaV3_5G035370/CsaV3_5G034230/CsaV3_6G046400/CsaV3_2G001130	CsaV3_6G041210/CsaV3_6G014890/CsaV3_6G014300/CsaV3_4G031600/CsaV3_1G002970/CsaV3_6G016510/CsaV3_5G002620/CsaV3_3G005500/CsaV3_4G028050/CsaV3_4G033030/CsaV3_3G005850/CsaV3_3G038830/CsaV3_6G012270/CsaV3_4G010360/CsaV3_3G046980/CsaV3_5G005690/CsaV3_5G008820/CsaV3_3G032680/CsaV3_3G003530/CsaV3_6G038660/CsaV3_3G022110/CsaV3_5G035370/CsaV3_5G034230/CsaV3_6G046400/CsaV3_2G001130	csv:101219332/csv:101208568/csv:101213447/csv:101221072/csv:101208545/csv:101208473/csv:101215293/csv:101209897/csv:101221224/csv:101202933/csv:101209230/csv:101221438/csv:101212709/csv:101216298/csv:101220176/csv:101209940/csv:101213310/csv:101216636/csv:101208984/csv:101204361/csv:101222280/csv:101205315/csv:101220491/csv:101218071/csv:101209687	25	16	CsaV3_6G041210/CsaV3_6G014890/CsaV3_6G014300/CsaV3_4G031600/CsaV3_1G002970/CsaV3_6G016510/CsaV3_5G002620/CsaV3_4G028050/CsaV3_4G033030/CsaV3_3G038830/CsaV3_3G046980/CsaV3_5G008820/CsaV3_3G032680/CsaV3_3G003530/CsaV3_6G038660/CsaV3_5G035370	9	CsaV3_3G005500/CsaV3_3G005850/CsaV3_6G012270/CsaV3_4G010360/CsaV3_5G005690/CsaV3_3G022110/CsaV3_5G034230/CsaV3_6G046400/CsaV3_2G001130
csv00350	Tyrosine metabolism	18/1838	37/4193	0.333198	0.99997	CsaV3_6G038150/CsaV3_1G001170/CsaV3_5G003800/CsaV3_7G022600/CsaV3_7G024950/CsaV3_6G031750/CsaV3_2G019530/CsaV3_6G038140/CsaV3_4G027010/CsaV3_2G032340/CsaV3_1G031900/CsaV3_7G024960/CsaV3_4G032000/CsaV3_2G019500/CsaV3_4G008430/CsaV3_7G024990/CsaV3_6G007280/CsaV3_1G012000	CsaV3_6G038150/CsaV3_1G001170/CsaV3_5G003800/CsaV3_7G022600/CsaV3_7G024950/CsaV3_6G031750/CsaV3_2G019530/CsaV3_6G038140/CsaV3_4G027010/CsaV3_2G032340/CsaV3_1G031900/CsaV3_7G024960/CsaV3_4G032000/CsaV3_2G019500/CsaV3_4G008430/CsaV3_7G024990/CsaV3_6G007280/CsaV3_1G012000	csv:101222468/csv:101204200/csv:101212818/csv:101210998/csv:101209854/csv:101212881/csv:101213302/csv:101222232/csv:101209562/csv:101213342/csv:101203411/csv:101206036/csv:101215051/csv:101213302/csv:101206356/csv:101206036/csv:101208145/csv:101219021	18	11	CsaV3_6G038150/CsaV3_7G024950/CsaV3_6G038140/CsaV3_4G027010/CsaV3_2G032340/CsaV3_1G031900/CsaV3_7G024960/CsaV3_2G019500/CsaV3_7G024990/CsaV3_6G007280/CsaV3_1G012000	7	CsaV3_1G001170/CsaV3_5G003800/CsaV3_7G022600/CsaV3_6G031750/CsaV3_2G019530/CsaV3_4G032000/CsaV3_4G008430
csv00051	Fructose and mannose metabolism	25/1838	53/4193	0.360338	0.99997	CsaV3_3G045360/CsaV3_6G006740/CsaV3_3G020950/CsaV3_3G021590/CsaV3_2G015690/CsaV3_3G016700/CsaV3_6G004010/CsaV3_3G036910/CsaV3_1G046070/CsaV3_3G016710/CsaV3_5G003450/CsaV3_6G001370/CsaV3_6G048080/CsaV3_2G001860/CsaV3_5G028690/CsaV3_3G023460/CsaV3_4G037690/CsaV3_4G031770/CsaV3_6G016080/CsaV3_2G008080/CsaV3_6G040430/CsaV3_6G044550/CsaV3_6G048090/CsaV3_6G048680/CsaV3_4G025890	CsaV3_3G045360/CsaV3_6G006740/CsaV3_3G020950/CsaV3_3G021590/CsaV3_2G015690/CsaV3_3G016700/CsaV3_6G004010/CsaV3_3G036910/CsaV3_1G046070/CsaV3_3G016710/CsaV3_5G003450/CsaV3_6G001370/CsaV3_6G048080/CsaV3_2G001860/CsaV3_5G028690/CsaV3_3G023460/CsaV3_4G037690/CsaV3_4G031770/CsaV3_6G016080/CsaV3_2G008080/CsaV3_6G040430/CsaV3_6G044550/CsaV3_6G048090/CsaV3_6G048680/CsaV3_4G025890	csv:101221789/csv:101213366/csv:101223130/csv:101213621/csv:101213372/csv:101221918/csv:101205576/csv:101209429/csv:101215219/csv:101221690/csv:101208090/csv:101211496/csv:101211230/csv:101218300/csv:101218080/csv:101220704/csv:101208728/csv:101218311/csv:101214487/csv:101209640/csv:101209044/csv:101219491/csv:101211230/csv:101203616/csv:101211447	25	13	CsaV3_3G045360/CsaV3_3G021590/CsaV3_2G015690/CsaV3_3G036910/CsaV3_1G046070/CsaV3_5G003450/CsaV3_5G028690/CsaV3_4G037690/CsaV3_4G031770/CsaV3_6G016080/CsaV3_6G040430/CsaV3_6G044550/CsaV3_6G048680	12	CsaV3_6G006740/CsaV3_3G020950/CsaV3_3G016700/CsaV3_6G004010/CsaV3_3G016710/CsaV3_6G001370/CsaV3_6G048080/CsaV3_2G001860/CsaV3_3G023460/CsaV3_2G008080/CsaV3_6G048090/CsaV3_4G025890
csv00960	Tropane, piperidine and pyridine alkaloid biosynthesis	10/1838	20/4193	0.367612	0.99997	CsaV3_6G038150/CsaV3_1G001170/CsaV3_5G003800/CsaV3_7G022600/CsaV3_5G008370/CsaV3_6G038140/CsaV3_4G027010/CsaV3_2G032340/CsaV3_1G034560/CsaV3_3G034620	CsaV3_6G038150/CsaV3_1G001170/CsaV3_5G003800/CsaV3_7G022600/CsaV3_5G008370/CsaV3_6G038140/CsaV3_4G027010/CsaV3_2G032340/CsaV3_1G034560/CsaV3_3G034620	csv:101222468/csv:101204200/csv:101212818/csv:101210998/csv:101218095/csv:101222232/csv:101209562/csv:101213342/csv:101206180/csv:101205728	10	6	CsaV3_6G038150/CsaV3_5G008370/CsaV3_6G038140/CsaV3_4G027010/CsaV3_2G032340/CsaV3_1G034560	4	CsaV3_1G001170/CsaV3_5G003800/CsaV3_7G022600/CsaV3_3G034620
csv00906	Carotenoid biosynthesis	15/1838	31/4193	0.368109	0.99997	CsaV3_4G007140/CsaV3_4G034320/CsaV3_4G007180/CsaV3_2G001370/CsaV3_6G008730/CsaV3_5G020340/CsaV3_2G026690/CsaV3_4G017450/CsaV3_1G032340/CsaV3_4G022080/CsaV3_1G034470/CsaV3_4G007760/CsaV3_4G023380/CsaV3_2G016630/CsaV3_4G007560	CsaV3_4G007140/CsaV3_4G034320/CsaV3_4G007180/CsaV3_2G001370/CsaV3_6G008730/CsaV3_5G020340/CsaV3_2G026690/CsaV3_4G017450/CsaV3_1G032340/CsaV3_4G022080/CsaV3_1G034470/CsaV3_4G007760/CsaV3_4G023380/CsaV3_2G016630/CsaV3_4G007560	csv:101212508/csv:101213916/csv:101220226/csv:101213753/csv:101218773/csv:101206471/csv:101220320/csv:101219033/csv:101204647/csv:101207778/csv:101216531/csv:101219505/csv:101216484/csv:101212903/csv:101214823	15	5	CsaV3_2G001370/CsaV3_1G032340/CsaV3_4G023380/CsaV3_2G016630/CsaV3_4G007560	10	CsaV3_4G007140/CsaV3_4G034320/CsaV3_4G007180/CsaV3_6G008730/CsaV3_5G020340/CsaV3_2G026690/CsaV3_4G017450/CsaV3_4G022080/CsaV3_1G034470/CsaV3_4G007760
csv00710	Carbon fixation in photosynthetic organisms	35/1838	76/4193	0.389516	0.99997	CsaV3_5G034910/CsaV3_6G006270/CsaV3_6G013490/CsaV3_7G028870/CsaV3_6G013500/CsaV3_3G023610/CsaV3_4G037480/CsaV3_2G015690/CsaV3_3G009790/CsaV3_6G004010/CsaV3_3G036910/CsaV3_4G033150/CsaV3_7G035320/CsaV3_3G001220/CsaV3_4G027010/CsaV3_5G028690/CsaV3_3G020110/CsaV3_6G001210/CsaV3_7G022930/CsaV3_1G037750/CsaV3_2G012760/novel.1201/CsaV3_4G031770/CsaV3_5G034360/CsaV3_1G009410/CsaV3_6G040430/CsaV3_5G03120…	CsaV3_5G034910/CsaV3_6G006270/CsaV3_6G013490/CsaV3_7G028870/CsaV3_6G013500/CsaV3_3G023610/CsaV3_4G037480/CsaV3_2G015690/CsaV3_3G009790/CsaV3_6G004010/CsaV3_3G036910/CsaV3_4G033150/CsaV3_7G035320/CsaV3_3G001220/CsaV3_4G027010/CsaV3_5G028690/CsaV3_3G020110/CsaV3_6G001210/CsaV3_7G022930/CsaV3_1G037750/CsaV3_2G012760/-/CsaV3_4G031770/CsaV3_5G034360/CsaV3_1G009410/CsaV3_6G040430/CsaV3_5G031200/CsaV3_3…	csv:101211316/csv:101206943/csv:101203472/csv:101214377/csv:101215670/csv:101214108/csv:101205112/csv:101213372/csv:101215805/csv:101205576/csv:101209429/csv:101208329/csv:101214072/csv:101208330/csv:101209562/csv:101218080/csv:101202856/csv:101214545/csv:101215513/csv:101214374/csv:101204387/csv:101204181/csv:101218311/csv:101219300/csv:101213074/csv:101209044/csv:101213570/csv:101222382/csv:101…	35	25	CsaV3_6G006270/CsaV3_6G013490/CsaV3_7G028870/CsaV3_6G013500/CsaV3_4G037480/CsaV3_2G015690/CsaV3_3G009790/CsaV3_3G036910/CsaV3_4G033150/CsaV3_3G001220/CsaV3_4G027010/CsaV3_5G028690/CsaV3_3G020110/CsaV3_6G001210/CsaV3_7G022930/CsaV3_1G037750/CsaV3_2G012760/CsaV3_4G031770/CsaV3_1G009410/CsaV3_6G040430/CsaV3_4G008360/CsaV3_3G031010/CsaV3_7G005670/CsaV3_2G004240/CsaV3_1G002350	10	CsaV3_5G034910/CsaV3_3G023610/CsaV3_6G004010/CsaV3_7G035320/novel.1201/CsaV3_5G034360/CsaV3_5G031200/CsaV3_3G048280/CsaV3_4G025890/CsaV3_3G013930
csv00290	Valine, leucine and isoleucine biosynthesis	8/1838	16/4193	0.399679	0.99997	CsaV3_7G005980/CsaV3_6G044420/CsaV3_5G014210/CsaV3_4G001800/CsaV3_1G000550/CsaV3_6G040240/CsaV3_1G044260/CsaV3_5G004400	CsaV3_7G005980/CsaV3_6G044420/CsaV3_5G014210/CsaV3_4G001800/CsaV3_1G000550/CsaV3_6G040240/CsaV3_1G044260/CsaV3_5G004400	csv:101213336/csv:101217437/csv:101212902/csv:101211790/csv:101213339/csv:101205909/csv:101208212/csv:101222997	8	7	CsaV3_7G005980/CsaV3_6G044420/CsaV3_5G014210/CsaV3_4G001800/CsaV3_6G040240/CsaV3_1G044260/CsaV3_5G004400	1	CsaV3_1G000550
csv00950	Isoquinoline alkaloid biosynthesis	8/1838	16/4193	0.399679	0.99997	CsaV3_6G038150/CsaV3_1G001170/CsaV3_5G003800/CsaV3_7G022600/CsaV3_6G038140/CsaV3_4G027010/CsaV3_2G032340/CsaV3_1G012000	CsaV3_6G038150/CsaV3_1G001170/CsaV3_5G003800/CsaV3_7G022600/CsaV3_6G038140/CsaV3_4G027010/CsaV3_2G032340/CsaV3_1G012000	csv:101222468/csv:101204200/csv:101212818/csv:101210998/csv:101222232/csv:101209562/csv:101213342/csv:101219021	8	5	CsaV3_6G038150/CsaV3_6G038140/CsaV3_4G027010/CsaV3_2G032340/CsaV3_1G012000	3	CsaV3_1G001170/CsaV3_5G003800/CsaV3_7G022600
csv03008	Ribosome biogenesis in eukaryotes	38/1838	83/4193	0.39994	0.99997	CsaV3_1G000680/CsaV3_7G024240/CsaV3_7G027900/CsaV3_2G002790/CsaV3_6G042250/CsaV3_3G017360/CsaV3_5G005970/CsaV3_3G040270/CsaV3_6G048920/CsaV3_7G021630/CsaV3_2G009090/CsaV3_UNG096720/CsaV3_4G010040/CsaV3_7G032650/CsaV3_1G043830/CsaV3_1G006340/CsaV3_4G004170/CsaV3_7G028370/CsaV3_7G034610/CsaV3_1G029680/CsaV3_6G021640/CsaV3_2G025380/CsaV3_2G019580/CsaV3_7G029310/CsaV3_7G021670/CsaV3_6G035590/novel.95…	CsaV3_1G000680/CsaV3_7G024240/CsaV3_7G027900/CsaV3_2G002790/CsaV3_6G042250/CsaV3_3G017360/CsaV3_5G005970/CsaV3_3G040270/CsaV3_6G048920/CsaV3_7G021630/CsaV3_2G009090/CsaV3_UNG096720/CsaV3_4G010040/CsaV3_7G032650/CsaV3_1G043830/CsaV3_1G006340/CsaV3_4G004170/CsaV3_7G028370/CsaV3_7G034610/CsaV3_1G029680/CsaV3_6G021640/CsaV3_2G025380/CsaV3_2G019580/CsaV3_7G029310/CsaV3_7G021670/CsaV3_6G035590/-/CsaV3_…	csv:101216223/csv:101220274/csv:101222973/csv:101222939/csv:101208150/csv:101213750/csv:101206527/csv:101219867/csv:101220805/csv:101222795/csv:101216698/csv:101217384/csv:101205153/csv:101221748/csv:101203634/csv:101208691/csv:101214572/csv:101220388/csv:101210104/csv:101211465/csv:101214103/csv:101221227/csv:101212091/csv:101207643/csv:101220903/csv:101215617/csv:101217101/csv:101216502/csv:101…	38	33	CsaV3_1G000680/CsaV3_7G027900/CsaV3_2G002790/CsaV3_6G042250/CsaV3_3G017360/CsaV3_5G005970/CsaV3_3G040270/CsaV3_6G048920/CsaV3_7G021630/CsaV3_2G009090/CsaV3_4G010040/CsaV3_7G032650/CsaV3_1G043830/CsaV3_1G006340/CsaV3_4G004170/CsaV3_7G028370/CsaV3_7G034610/CsaV3_1G029680/CsaV3_6G021640/CsaV3_2G025380/CsaV3_2G019580/CsaV3_7G029310/CsaV3_6G035590/novel.950/CsaV3_4G030490/CsaV3_5G002950/CsaV3_5G024730…	5	CsaV3_7G024240/CsaV3_UNG096720/CsaV3_7G021670/CsaV3_5G037440/CsaV3_1G005910
csv00270	Cysteine and methionine metabolism	46/1838	101/4193	0.400301	0.99997	CsaV3_4G006090/CsaV3_3G000880/CsaV3_6G000650/CsaV3_5G013990/CsaV3_5G039900/CsaV3_6G037780/CsaV3_2G013530/CsaV3_7G028870/CsaV3_7G018620/CsaV3_3G039680/CsaV3_6G015400/CsaV3_2G007750/novel.86/CsaV3_6G047800/CsaV3_2G007760/CsaV3_1G042250/CsaV3_2G011670/CsaV3_6G044420/CsaV3_5G014440/CsaV3_6G005510/CsaV3_4G027010/CsaV3_2G032340/CsaV3_6G048630/CsaV3_5G034310/CsaV3_7G000760/CsaV3_2G012760/CsaV3_4G033640/…	CsaV3_4G006090/CsaV3_3G000880/CsaV3_6G000650/CsaV3_5G013990/CsaV3_5G039900/CsaV3_6G037780/CsaV3_2G013530/CsaV3_7G028870/CsaV3_7G018620/CsaV3_3G039680/CsaV3_6G015400/CsaV3_2G007750/-/CsaV3_6G047800/CsaV3_2G007760/CsaV3_1G042250/CsaV3_2G011670/CsaV3_6G044420/CsaV3_5G014440/CsaV3_6G005510/CsaV3_4G027010/CsaV3_2G032340/CsaV3_6G048630/CsaV3_5G034310/CsaV3_7G000760/CsaV3_2G012760/CsaV3_4G033640/CsaV3_3…	csv:101212728/csv:101214172/csv:101220896/csv:101206078/csv:101202843/csv:101209525/csv:101222725/csv:101214377/csv:101213467/csv:101212693/csv:101221653/csv:101215844/csv:101218979/csv:101214370/csv:101207514/csv:101218956/csv:101215667/csv:101217437/csv:101206329/csv:101216328/csv:101209562/csv:101213342/csv:101204103/csv:101218830/csv:101204791/csv:101204387/csv:101205098/csv:101221689/csv:101…	46	32	CsaV3_6G000650/CsaV3_5G013990/CsaV3_5G039900/CsaV3_7G028870/CsaV3_3G039680/CsaV3_1G042250/CsaV3_2G011670/CsaV3_6G044420/CsaV3_5G014440/CsaV3_6G005510/CsaV3_4G027010/CsaV3_2G032340/CsaV3_5G034310/CsaV3_7G000760/CsaV3_2G012760/CsaV3_4G033640/CsaV3_3G018240/CsaV3_3G028000/CsaV3_1G041720/CsaV3_1G039210/CsaV3_1G005050/CsaV3_6G039940/CsaV3_5G030740/CsaV3_3G000370/CsaV3_3G041150/CsaV3_4G008360/CsaV3_3G0…	14	CsaV3_4G006090/CsaV3_3G000880/CsaV3_6G037780/CsaV3_2G013530/CsaV3_7G018620/CsaV3_6G015400/CsaV3_2G007750/novel.86/CsaV3_6G047800/CsaV3_2G007760/CsaV3_6G048630/CsaV3_2G006550/CsaV3_3G012920/CsaV3_6G031510
csv00073	Cutin, suberine and wax biosynthesis	12/1838	25/4193	0.410583	0.99997	CsaV3_3G010300/CsaV3_6G006560/CsaV3_6G014940/CsaV3_5G002710/CsaV3_6G004090/CsaV3_3G043880/CsaV3_1G030900/CsaV3_7G030640/CsaV3_3G010310/CsaV3_5G035630/CsaV3_2G009920/CsaV3_3G014530	CsaV3_3G010300/CsaV3_6G006560/CsaV3_6G014940/CsaV3_5G002710/CsaV3_6G004090/CsaV3_3G043880/CsaV3_1G030900/CsaV3_7G030640/CsaV3_3G010310/CsaV3_5G035630/CsaV3_2G009920/CsaV3_3G014530	csv:101203441/csv:101222843/csv:101209297/csv:101216733/csv:101206763/csv:101205454/csv:101212905/csv:101212202/csv:101203691/csv:101217068/csv:101205541/csv:101210493	12	8	CsaV3_3G010300/CsaV3_6G006560/CsaV3_6G014940/CsaV3_6G004090/CsaV3_3G043880/CsaV3_3G010310/CsaV3_5G035630/CsaV3_3G014530	4	CsaV3_5G002710/CsaV3_1G030900/CsaV3_7G030640/CsaV3_2G009920
csv00360	Phenylalanine metabolism	20/1838	43/4193	0.418103	0.99997	CsaV3_6G038150/CsaV3_1G001170/CsaV3_5G003800/CsaV3_7G022600/CsaV3_4G002330/CsaV3_4G002320/CsaV3_2G015800/CsaV3_6G039690/CsaV3_4G002310/CsaV3_4G002290/CsaV3_7G000850/CsaV3_4G002300/CsaV3_6G038140/CsaV3_1G040750/CsaV3_6G039680/CsaV3_4G027010/CsaV3_2G032340/CsaV3_6G039700/CsaV3_1G031900/CsaV3_4G032000	CsaV3_6G038150/CsaV3_1G001170/CsaV3_5G003800/CsaV3_7G022600/CsaV3_4G002330/CsaV3_4G002320/CsaV3_2G015800/CsaV3_6G039690/CsaV3_4G002310/CsaV3_4G002290/CsaV3_7G000850/CsaV3_4G002300/CsaV3_6G038140/CsaV3_1G040750/CsaV3_6G039680/CsaV3_4G027010/CsaV3_2G032340/CsaV3_6G039700/CsaV3_1G031900/CsaV3_4G032000	csv:101222468/csv:101204200/csv:101212818/csv:101210998/csv:101203846/csv:101203846/csv:101214819/csv:101218617/csv:101203846/csv:101203846/csv:101205749/csv:101203846/csv:101222232/csv:101205510/csv:101218382/csv:101209562/csv:101213342/csv:101222092/csv:101203411/csv:101215051	20	7	CsaV3_6G038150/CsaV3_2G015800/CsaV3_7G000850/CsaV3_6G038140/CsaV3_4G027010/CsaV3_2G032340/CsaV3_1G031900	13	CsaV3_1G001170/CsaV3_5G003800/CsaV3_7G022600/CsaV3_4G002330/CsaV3_4G002320/CsaV3_6G039690/CsaV3_4G002310/CsaV3_4G002290/CsaV3_4G002300/CsaV3_1G040750/CsaV3_6G039680/CsaV3_6G039700/CsaV3_4G032000
csv03440	Homologous recombination	31/1838	69/4193	0.473327	0.99997	CsaV3_1G041430/CsaV3_6G041210/CsaV3_3G019190/CsaV3_3G033440/CsaV3_4G037380/CsaV3_1G002970/CsaV3_1G006450/CsaV3_4G033030/CsaV3_7G029870/CsaV3_6G052190/CsaV3_3G038830/CsaV3_3G028200/CsaV3_UNG098730/CsaV3_5G036480/CsaV3_3G018560/CsaV3_5G010570/CsaV3_3G046980/CsaV3_3G026510/CsaV3_2G022190/CsaV3_5G005690/CsaV3_UNG178380/CsaV3_4G001390/CsaV3_4G037390/CsaV3_2G001420/CsaV3_3G049740/CsaV3_5G035370/novel.1…	CsaV3_1G041430/CsaV3_6G041210/CsaV3_3G019190/CsaV3_3G033440/CsaV3_4G037380/CsaV3_1G002970/CsaV3_1G006450/CsaV3_4G033030/CsaV3_7G029870/CsaV3_6G052190/CsaV3_3G038830/CsaV3_3G028200/CsaV3_UNG098730/CsaV3_5G036480/CsaV3_3G018560/CsaV3_5G010570/CsaV3_3G046980/CsaV3_3G026510/CsaV3_2G022190/CsaV3_5G005690/CsaV3_UNG178380/CsaV3_4G001390/CsaV3_4G037390/CsaV3_2G001420/CsaV3_3G049740/CsaV3_5G035370/-/CsaV3…	csv:101214733/csv:101219332/csv:101211021/csv:101215906/csv:101217839/csv:101208545/csv:101210420/csv:101202933/csv:101219784/csv:101212120/csv:101221438/csv:101222995/csv:101210305/csv:101219408/csv:101218846/csv:101215377/csv:101220176/csv:101212525/csv:101216994/csv:101209940/csv:101210305/csv:101217628/csv:101218075/csv:101205667/csv:105435045/csv:101205315/csv:101210305/csv:101214977/csv:101…	31	26	CsaV3_1G041430/CsaV3_6G041210/CsaV3_3G019190/CsaV3_3G033440/CsaV3_4G037380/CsaV3_1G002970/CsaV3_1G006450/CsaV3_4G033030/CsaV3_7G029870/CsaV3_6G052190/CsaV3_3G038830/CsaV3_3G028200/CsaV3_5G036480/CsaV3_3G018560/CsaV3_5G010570/CsaV3_3G046980/CsaV3_2G022190/CsaV3_4G001390/CsaV3_4G037390/CsaV3_2G001420/CsaV3_3G049740/CsaV3_5G035370/CsaV3_6G031560/CsaV3_3G039390/CsaV3_3G045910/CsaV3_6G042140	5	CsaV3_UNG098730/CsaV3_3G026510/CsaV3_5G005690/CsaV3_UNG178380/novel.1204
csv00450	Selenocompound metabolism	8/1838	17/4193	0.486579	0.99997	CsaV3_3G000880/CsaV3_2G011140/CsaV3_1G041720/CsaV3_3G041150/CsaV3_3G012820/CsaV3_4G011840/CsaV3_5G026430/CsaV3_6G031510	CsaV3_3G000880/CsaV3_2G011140/CsaV3_1G041720/CsaV3_3G041150/CsaV3_3G012820/CsaV3_4G011840/CsaV3_5G026430/CsaV3_6G031510	csv:101214172/csv:101208697/csv:101218702/csv:101212851/csv:101221111/csv:101211038/csv:101210109/csv:101216175	8	4	CsaV3_2G011140/CsaV3_1G041720/CsaV3_3G041150/CsaV3_4G011840	4	CsaV3_3G000880/CsaV3_3G012820/CsaV3_5G026430/CsaV3_6G031510
csv00460	Cyanoamino acid metabolism	18/1838	40/4193	0.501728	0.99997	CsaV3_3G044560/CsaV3_1G004550/CsaV3_4G034720/CsaV3_6G043980/CsaV3_6G000650/CsaV3_4G028640/CsaV3_1G036000/CsaV3_3G043060/novel.202/CsaV3_2G008170/CsaV3_6G045790/CsaV3_1G039010/CsaV3_3G040580/CsaV3_2G008210/CsaV3_4G033920/CsaV3_1G015110/CsaV3_1G042470/CsaV3_2G001680	CsaV3_3G044560/CsaV3_1G004550/CsaV3_4G034720/CsaV3_6G043980/CsaV3_6G000650/CsaV3_4G028640/CsaV3_1G036000/CsaV3_3G043060/-/CsaV3_2G008170/CsaV3_6G045790/CsaV3_1G039010/CsaV3_3G040580/CsaV3_2G008210/CsaV3_4G033920/CsaV3_1G015110/CsaV3_1G042470/CsaV3_2G001680	csv:101215384/csv:101204835/csv:101218064/csv:101206142/csv:101220896/csv:101215287/csv:101214999/csv:101223112/csv:101210312/csv:101213549/csv:101214973/csv:101208927/csv:101215343/csv:101218493/csv:101220587/csv:101209360/csv:101208027/csv:101221216	18	3	CsaV3_1G004550/CsaV3_6G000650/CsaV3_2G008210	15	CsaV3_3G044560/CsaV3_4G034720/CsaV3_6G043980/CsaV3_4G028640/CsaV3_1G036000/CsaV3_3G043060/novel.202/CsaV3_2G008170/CsaV3_6G045790/CsaV3_1G039010/CsaV3_3G040580/CsaV3_4G033920/CsaV3_1G015110/CsaV3_1G042470/CsaV3_2G001680
csv03013	RNA transport	64/1838	145/4193	0.502818	0.99997	CsaV3_7G021830/CsaV3_5G000410/CsaV3_4G031880/CsaV3_7G024240/CsaV3_2G035660/CsaV3_3G039830/CsaV3_3G019240/CsaV3_3G046890/CsaV3_3G005110/CsaV3_3G041110/CsaV3_1G032830/CsaV3_1G037230/CsaV3_7G021200/CsaV3_4G027730/CsaV3_3G007250/CsaV3_7G025160/CsaV3_1G014700/CsaV3_7G031350/CsaV3_3G023730/CsaV3_7G035410/CsaV3_5G015740/CsaV3_7G003720/CsaV3_6G001680/CsaV3_3G013520/CsaV3_6G037860/CsaV3_6G009050/CsaV3_2G0…	CsaV3_7G021830/CsaV3_5G000410/CsaV3_4G031880/CsaV3_7G024240/CsaV3_2G035660/CsaV3_3G039830/CsaV3_3G019240/CsaV3_3G046890/CsaV3_3G005110/CsaV3_3G041110/CsaV3_1G032830/CsaV3_1G037230/CsaV3_7G021200/CsaV3_4G027730/CsaV3_3G007250/CsaV3_7G025160/CsaV3_1G014700/CsaV3_7G031350/CsaV3_3G023730/CsaV3_7G035410/CsaV3_5G015740/CsaV3_7G003720/CsaV3_6G001680/CsaV3_3G013520/CsaV3_6G037860/CsaV3_6G009050/CsaV3_2G0…	csv:101202908/csv:101203580/csv:101216970/csv:101220274/csv:101208997/csv:101210745/csv:101203990/csv:101221977/csv:101214921/csv:101211648/csv:101206312/csv:101209344/csv:101216475/csv:101205199/csv:101218026/csv:101204360/csv:101221461/csv:101222300/csv:101205997/csv:101212387/csv:101212476/csv:101219651/csv:101205957/csv:101208192/csv:101211250/csv:101215672/csv:101216087/csv:101216950/csv:101…	64	49	CsaV3_4G031880/CsaV3_3G039830/CsaV3_3G019240/CsaV3_3G046890/CsaV3_3G041110/CsaV3_1G032830/CsaV3_1G037230/CsaV3_7G021200/CsaV3_4G027730/CsaV3_3G007250/CsaV3_7G025160/CsaV3_1G014700/CsaV3_7G031350/CsaV3_3G023730/CsaV3_7G035410/CsaV3_5G015740/CsaV3_6G001680/CsaV3_3G013520/CsaV3_6G037860/CsaV3_6G009050/CsaV3_2G007740/CsaV3_1G043080/CsaV3_2G002830/CsaV3_4G036460/CsaV3_4G006470/CsaV3_7G022370/CsaV3_1G0…	15	CsaV3_7G021830/CsaV3_5G000410/CsaV3_7G024240/CsaV3_2G035660/CsaV3_3G005110/CsaV3_7G003720/CsaV3_1G003550/CsaV3_1G023010/CsaV3_7G034670/CsaV3_3G031460/CsaV3_1G033610/CsaV3_5G025900/CsaV3_6G017140/CsaV3_1G024130/CsaV3_2G015740
csv00620	Pyruvate metabolism	38/1838	86/4193	0.515598	0.99997	CsaV3_3G005000/CsaV3_6G039890/CsaV3_4G000590/CsaV3_3G021780/CsaV3_7G024120/CsaV3_7G028870/CsaV3_3G023610/CsaV3_1G032330/CsaV3_4G029830/CsaV3_2G013320/CsaV3_4G025950/CsaV3_4G033150/CsaV3_5G031990/CsaV3_7G035320/CsaV3_6G048970/CsaV3_5G034210/CsaV3_2G012760/CsaV3_4G001010/CsaV3_4G017590/CsaV3_6G022400/novel.1201/CsaV3_1G016950/CsaV3_6G000070/CsaV3_5G029170/CsaV3_6G040330/CsaV3_5G023610/CsaV3_3G04828…	CsaV3_3G005000/CsaV3_6G039890/CsaV3_4G000590/CsaV3_3G021780/CsaV3_7G024120/CsaV3_7G028870/CsaV3_3G023610/CsaV3_1G032330/CsaV3_4G029830/CsaV3_2G013320/CsaV3_4G025950/CsaV3_4G033150/CsaV3_5G031990/CsaV3_7G035320/CsaV3_6G048970/CsaV3_5G034210/CsaV3_2G012760/CsaV3_4G001010/CsaV3_4G017590/CsaV3_6G022400/-/CsaV3_1G016950/CsaV3_6G000070/CsaV3_5G029170/CsaV3_6G040330/CsaV3_5G023610/CsaV3_3G048280/CsaV3_4…	csv:101203268/csv:101221855/csv:101208672/csv:101206887/csv:101215151/csv:101214377/csv:101214108/csv:101204247/csv:101221707/csv:101218017/csv:101210209/csv:101208329/csv:101208773/csv:101214072/csv:101220097/csv:101220730/csv:101204387/csv:101203115/csv:101216029/csv:101209306/csv:101204181/csv:101222828/csv:101207718/csv:101212411/csv:101206620/csv:101212380/csv:101222382/csv:101207078/csv:101…	38	28	CsaV3_4G000590/CsaV3_3G021780/CsaV3_7G024120/CsaV3_7G028870/CsaV3_1G032330/CsaV3_4G029830/CsaV3_2G013320/CsaV3_4G025950/CsaV3_4G033150/CsaV3_5G031990/CsaV3_6G048970/CsaV3_5G034210/CsaV3_2G012760/CsaV3_4G001010/CsaV3_4G017590/CsaV3_6G022400/CsaV3_1G016950/CsaV3_6G000070/CsaV3_5G029170/CsaV3_6G040330/CsaV3_5G023610/CsaV3_4G008360/CsaV3_4G008750/CsaV3_6G036340/CsaV3_2G003700/CsaV3_7G005670/CsaV3_6G0…	10	CsaV3_3G005000/CsaV3_6G039890/CsaV3_3G023610/CsaV3_7G035320/novel.1201/CsaV3_3G048280/CsaV3_3G038380/CsaV3_4G005260/novel.756/CsaV3_3G013930
csv00220	Arginine biosynthesis	16/1838	36/4193	0.534899	0.99997	CsaV3_6G006290/CsaV3_2G031570/CsaV3_3G035070/novel.389/CsaV3_5G005130/CsaV3_3G045350/CsaV3_5G030450/CsaV3_4G027010/CsaV3_4G013280/CsaV3_5G005200/CsaV3_2G032340/CsaV3_5G023920/CsaV3_5G031200/CsaV3_7G032040/CsaV3_3G031010/CsaV3_3G047990	CsaV3_6G006290/CsaV3_2G031570/CsaV3_3G035070/-/CsaV3_5G005130/CsaV3_3G045350/CsaV3_5G030450/CsaV3_4G027010/CsaV3_4G013280/CsaV3_5G005200/CsaV3_2G032340/CsaV3_5G023920/CsaV3_5G031200/CsaV3_7G032040/CsaV3_3G031010/CsaV3_3G047990	csv:101207674/csv:101203871/csv:101222699/csv:101220538/csv:101218466/csv:101222023/csv:101209590/csv:101209562/csv:101221948/csv:101215455/csv:101213342/csv:101215515/csv:101213570/csv:101211809/csv:101207254/csv:101205167	16	13	CsaV3_6G006290/CsaV3_2G031570/CsaV3_3G035070/novel.389/CsaV3_3G045350/CsaV3_5G030450/CsaV3_4G027010/CsaV3_4G013280/CsaV3_5G005200/CsaV3_2G032340/CsaV3_7G032040/CsaV3_3G031010/CsaV3_3G047990	3	CsaV3_5G005130/CsaV3_5G023920/CsaV3_5G031200
csv00480	Glutathione metabolism	34/1838	78/4193	0.561431	0.99997	CsaV3_7G029060/CsaV3_2G031240/CsaV3_3G011460/CsaV3_7G029050/CsaV3_4G025630/CsaV3_3G011450/CsaV3_4G025770/CsaV3_4G025650/CsaV3_5G002680/CsaV3_4G006330/CsaV3_5G027250/CsaV3_6G042080/CsaV3_6G045790/CsaV3_3G027630/CsaV3_4G025680/CsaV3_3G011470/CsaV3_2G007520/CsaV3_6G034310/CsaV3_6G000030/CsaV3_1G005440/CsaV3_3G009990/CsaV3_3G028000/CsaV3_1G039210/novel.7/CsaV3_6G021870/CsaV3_1G004150/CsaV3_7G027540/C…	CsaV3_7G029060/CsaV3_2G031240/CsaV3_3G011460/CsaV3_7G029050/CsaV3_4G025630/CsaV3_3G011450/CsaV3_4G025770/CsaV3_4G025650/CsaV3_5G002680/CsaV3_4G006330/CsaV3_5G027250/CsaV3_6G042080/CsaV3_6G045790/CsaV3_3G027630/CsaV3_4G025680/CsaV3_3G011470/CsaV3_2G007520/CsaV3_6G034310/CsaV3_6G000030/CsaV3_1G005440/CsaV3_3G009990/CsaV3_3G028000/CsaV3_1G039210/-/CsaV3_6G021870/CsaV3_1G004150/CsaV3_7G027540/CsaV3_5…	csv:101212291/csv:101208455/csv:101207634/csv:101212536/csv:105434443/csv:101207387/csv:101214992/csv:101220464/csv:101216008/csv:101206171/csv:101202770/csv:101210105/csv:101214973/csv:101222416/csv:101214992/csv:101207882/csv:101219418/csv:101216755/csv:101208623/csv:101203519/csv:101219529/csv:101212743/csv:101211392/csv:101203766/csv:101221563/csv:101217418/csv:101217298/csv:101218859/csv:101…	34	20	CsaV3_7G029060/CsaV3_7G029050/CsaV3_4G025630/CsaV3_5G002680/CsaV3_4G006330/CsaV3_5G027250/CsaV3_6G042080/CsaV3_3G027630/CsaV3_2G007520/CsaV3_6G034310/CsaV3_6G000030/CsaV3_3G009990/CsaV3_3G028000/CsaV3_1G039210/novel.7/CsaV3_6G021870/CsaV3_7G027540/CsaV3_5G002830/CsaV3_5G038830/CsaV3_4G029990	14	CsaV3_2G031240/CsaV3_3G011460/CsaV3_3G011450/CsaV3_4G025770/CsaV3_4G025650/CsaV3_6G045790/CsaV3_4G025680/CsaV3_3G011470/CsaV3_1G005440/CsaV3_1G004150/CsaV3_3G020840/CsaV3_2G001680/CsaV3_4G025690/CsaV3_4G025750
csv01200	Carbon metabolism	107/1838	246/4193	0.569182	0.99997	CsaV3_5G034910/CsaV3_5G026370/CsaV3_6G006270/CsaV3_6G043980/CsaV3_6G000650/CsaV3_4G028640/CsaV3_5G000220/CsaV3_5G033390/CsaV3_3G021780/CsaV3_4G013550/CsaV3_4G006330/CsaV3_7G024120/CsaV3_6G013490/CsaV3_7G028870/CsaV3_7G018620/CsaV3_6G031750/CsaV3_4G036550/CsaV3_6G013500/CsaV3_1G043170/CsaV3_5G027250/CsaV3_3G023610/CsaV3_1G032330/novel.86/CsaV3_4G037480/CsaV3_6G047800/CsaV3_4G029830/CsaV3_2G013320/…	CsaV3_5G034910/CsaV3_5G026370/CsaV3_6G006270/CsaV3_6G043980/CsaV3_6G000650/CsaV3_4G028640/CsaV3_5G000220/CsaV3_5G033390/CsaV3_3G021780/CsaV3_4G013550/CsaV3_4G006330/CsaV3_7G024120/CsaV3_6G013490/CsaV3_7G028870/CsaV3_7G018620/CsaV3_6G031750/CsaV3_4G036550/CsaV3_6G013500/CsaV3_1G043170/CsaV3_5G027250/CsaV3_3G023610/CsaV3_1G032330/-/CsaV3_4G037480/CsaV3_6G047800/CsaV3_4G029830/CsaV3_2G013320/CsaV3_2…	csv:101211316/csv:101208883/csv:101206943/csv:101206142/csv:101220896/csv:101215287/csv:101208410/csv:101210739/csv:101206887/csv:101217925/csv:101206171/csv:101215151/csv:101203472/csv:101214377/csv:101213467/csv:101212881/csv:101212576/csv:101215670/csv:101217893/csv:101202770/csv:101214108/csv:101204247/csv:101218979/csv:101205112/csv:101214370/csv:101221707/csv:101218017/csv:101213372/csv:101…	107	76	CsaV3_6G006270/CsaV3_6G000650/CsaV3_3G021780/CsaV3_4G013550/CsaV3_4G006330/CsaV3_7G024120/CsaV3_6G013490/CsaV3_7G028870/CsaV3_4G036550/CsaV3_6G013500/CsaV3_5G027250/CsaV3_1G032330/CsaV3_4G037480/CsaV3_4G029830/CsaV3_2G013320/CsaV3_2G015690/CsaV3_3G009790/CsaV3_4G025950/CsaV3_3G036910/CsaV3_4G033150/CsaV3_5G031990/CsaV3_3G001220/CsaV3_4G027010/CsaV3_5G028690/CsaV3_3G020110/CsaV3_6G001210/CsaV3_4G0…	31	CsaV3_5G034910/CsaV3_5G026370/CsaV3_6G043980/CsaV3_4G028640/CsaV3_5G000220/CsaV3_5G033390/CsaV3_7G018620/CsaV3_6G031750/CsaV3_1G043170/CsaV3_3G023610/novel.86/CsaV3_6G047800/CsaV3_5G005130/CsaV3_6G004010/CsaV3_7G035320/CsaV3_6G048080/CsaV3_2G001860/CsaV3_6G031490/CsaV3_3G023460/novel.1201/CsaV3_UNG208730/CsaV3_5G034360/CsaV3_5G031200/CsaV3_2G003650/CsaV3_3G048280/CsaV3_6G044860/CsaV3_1G016980/Csa…
csv00770	Pantothenate and CoA biosynthesis	10/1838	23/4193	0.593341	0.99997	CsaV3_7G005980/CsaV3_2G001510/CsaV3_6G044420/CsaV3_1G009240/CsaV3_5G014210/CsaV3_1G000550/CsaV3_6G035700/CsaV3_1G044260/CsaV3_4G000530/CsaV3_6G003860	CsaV3_7G005980/CsaV3_2G001510/CsaV3_6G044420/CsaV3_1G009240/CsaV3_5G014210/CsaV3_1G000550/CsaV3_6G035700/CsaV3_1G044260/CsaV3_4G000530/CsaV3_6G003860	csv:101213336/csv:101204456/csv:101217437/csv:101211378/csv:101212902/csv:101213339/csv:101214416/csv:101208212/csv:101209408/csv:101203236	10	6	CsaV3_7G005980/CsaV3_2G001510/CsaV3_6G044420/CsaV3_1G009240/CsaV3_5G014210/CsaV3_1G044260	4	CsaV3_1G000550/CsaV3_6G035700/CsaV3_4G000530/CsaV3_6G003860
csv00260	Glycine, serine and threonine metabolism	30/1838	70/4193	0.611395	0.99997	CsaV3_6G038150/CsaV3_1G001170/CsaV3_3G043270/CsaV3_2G001290/CsaV3_5G003800/CsaV3_7G022600/CsaV3_4G028640/CsaV3_5G039900/CsaV3_2G003740/CsaV3_4G013550/CsaV3_2G013730/CsaV3_1G043170/CsaV3_UNG002020/CsaV3_6G038140/CsaV3_5G014440/CsaV3_1G045310/CsaV3_1G010970/CsaV3_1G046250/CsaV3_6G022400/CsaV3_6G000070/CsaV3_3G018240/CsaV3_6G040240/CsaV3_7G001970/CsaV3_1G010620/CsaV3_1G044710/CsaV3_5G031200/CsaV3_3G…	CsaV3_6G038150/CsaV3_1G001170/CsaV3_3G043270/CsaV3_2G001290/CsaV3_5G003800/CsaV3_7G022600/CsaV3_4G028640/CsaV3_5G039900/CsaV3_2G003740/CsaV3_4G013550/CsaV3_2G013730/CsaV3_1G043170/CsaV3_UNG002020/CsaV3_6G038140/CsaV3_5G014440/CsaV3_1G045310/CsaV3_1G010970/CsaV3_1G046250/CsaV3_6G022400/CsaV3_6G000070/CsaV3_3G018240/CsaV3_6G040240/CsaV3_7G001970/CsaV3_1G010620/CsaV3_1G044710/CsaV3_5G031200/CsaV3_3G…	csv:101222468/csv:101204200/csv:101222321/csv:101208070/csv:101212818/csv:101210998/csv:101215287/csv:101202843/csv:101207481/csv:101217925/csv:101220215/csv:101217893/csv:101205859/csv:101222232/csv:101206329/csv:101205859/csv:101208895/csv:101217522/csv:101209306/csv:101207718/csv:101221689/csv:101205909/csv:101222129/csv:101209820/csv:101220286/csv:101213570/csv:101202934/csv:101217208/csv:101…	30	18	CsaV3_6G038150/CsaV3_3G043270/CsaV3_5G039900/CsaV3_4G013550/CsaV3_2G013730/CsaV3_6G038140/CsaV3_5G014440/CsaV3_1G046250/CsaV3_6G022400/CsaV3_6G000070/CsaV3_3G018240/CsaV3_6G040240/CsaV3_7G001970/CsaV3_1G010620/CsaV3_1G044710/CsaV3_3G000370/CsaV3_2G017260/CsaV3_UNG227820	12	CsaV3_1G001170/CsaV3_2G001290/CsaV3_5G003800/CsaV3_7G022600/CsaV3_4G028640/CsaV3_2G003740/CsaV3_1G043170/CsaV3_UNG002020/CsaV3_1G045310/CsaV3_1G010970/CsaV3_5G031200/CsaV3_5G002940
csv00740	Riboflavin metabolism	6/1838	14/4193	0.629867	0.99997	CsaV3_2G001510/CsaV3_6G003290/CsaV3_7G005640/CsaV3_5G027770/CsaV3_2G009540/novel.204	CsaV3_2G001510/CsaV3_6G003290/CsaV3_7G005640/CsaV3_5G027770/CsaV3_2G009540/-	csv:101204456/csv:101212510/csv:101207959/csv:101221226/csv:101210563/csv:101205892	6	3	CsaV3_2G001510/CsaV3_7G005640/novel.204	3	CsaV3_6G003290/CsaV3_5G027770/CsaV3_2G009540
csv00640	Propanoate metabolism	16/1838	38/4193	0.645644	0.99997	CsaV3_4G036550/CsaV3_4G029830/CsaV3_4G025950/CsaV3_6G034530/CsaV3_1G007500/CsaV3_6G007490/CsaV3_6G022400/CsaV3_4G031950/CsaV3_6G000070/CsaV3_5G023610/CsaV3_6G044860/CsaV3_4G008750/CsaV3_2G003700/CsaV3_1G041530/CsaV3_3G014830/CsaV3_6G041570	CsaV3_4G036550/CsaV3_4G029830/CsaV3_4G025950/CsaV3_6G034530/CsaV3_1G007500/CsaV3_6G007490/CsaV3_6G022400/CsaV3_4G031950/CsaV3_6G000070/CsaV3_5G023610/CsaV3_6G044860/CsaV3_4G008750/CsaV3_2G003700/CsaV3_1G041530/CsaV3_3G014830/CsaV3_6G041570	csv:101212576/csv:101221707/csv:101210209/csv:101216977/csv:101206269/csv:101205496/csv:101209306/csv:101215537/csv:101207718/csv:101212380/csv:101207178/csv:101222930/csv:101207970/csv:101216174/csv:101206829/csv:101205130	16	11	CsaV3_4G036550/CsaV3_4G029830/CsaV3_4G025950/CsaV3_1G007500/CsaV3_6G007490/CsaV3_6G022400/CsaV3_4G031950/CsaV3_6G000070/CsaV3_5G023610/CsaV3_4G008750/CsaV3_2G003700	5	CsaV3_6G034530/CsaV3_6G044860/CsaV3_1G041530/CsaV3_3G014830/CsaV3_6G041570
csv00280	Valine, leucine and isoleucine degradation	20/1838	48/4193	0.671988	0.99997	CsaV3_3G005890/CsaV3_4G036550/CsaV3_6G021710/CsaV3_6G034530/CsaV3_3G005880/CsaV3_6G044420/CsaV3_6G022400/CsaV3_4G031950/CsaV3_6G000070/CsaV3_3G028760/CsaV3_2G011380/CsaV3_6G044860/CsaV3_1G030150/CsaV3_1G041530/CsaV3_4G005260/CsaV3_3G014830/CsaV3_6G038810/CsaV3_7G027810/CsaV3_3G003490/CsaV3_6G041570	CsaV3_3G005890/CsaV3_4G036550/CsaV3_6G021710/CsaV3_6G034530/CsaV3_3G005880/CsaV3_6G044420/CsaV3_6G022400/CsaV3_4G031950/CsaV3_6G000070/CsaV3_3G028760/CsaV3_2G011380/CsaV3_6G044860/CsaV3_1G030150/CsaV3_1G041530/CsaV3_4G005260/CsaV3_3G014830/CsaV3_6G038810/CsaV3_7G027810/CsaV3_3G003490/CsaV3_6G041570	csv:101208501/csv:101212576/csv:101216988/csv:101216977/csv:101208501/csv:101217437/csv:101209306/csv:101215537/csv:101207718/csv:101208182/csv:101212301/csv:101207178/csv:101216988/csv:101216174/csv:101221321/csv:101206829/csv:101203798/csv:101221786/csv:101208259/csv:101205130	20	9	CsaV3_3G005890/CsaV3_4G036550/CsaV3_3G005880/CsaV3_6G044420/CsaV3_6G022400/CsaV3_4G031950/CsaV3_6G000070/CsaV3_3G028760/CsaV3_3G003490	11	CsaV3_6G021710/CsaV3_6G034530/CsaV3_2G011380/CsaV3_6G044860/CsaV3_1G030150/CsaV3_1G041530/CsaV3_4G005260/CsaV3_3G014830/CsaV3_6G038810/CsaV3_7G027810/CsaV3_6G041570
csv00340	Histidine metabolism	7/1838	17/4193	0.67586	0.99997	CsaV3_5G040040/CsaV3_5G029840/CsaV3_7G022530/CsaV3_1G019620/CsaV3_4G005260/CsaV3_6G005330/CsaV3_7G021940	CsaV3_5G040040/CsaV3_5G029840/CsaV3_7G022530/CsaV3_1G019620/CsaV3_4G005260/CsaV3_6G005330/CsaV3_7G021940	csv:101205670/csv:101219620/csv:101211659/csv:101204289/csv:101221321/csv:101204289/csv:101205184	7	6	CsaV3_5G040040/CsaV3_5G029840/CsaV3_7G022530/CsaV3_1G019620/CsaV3_6G005330/CsaV3_7G021940	1	CsaV3_4G005260
csv04120	Ubiquitin mediated proteolysis	41/1838	98/4193	0.692546	0.99997	CsaV3_3G046770/CsaV3_6G014350/CsaV3_5G032430/CsaV3_2G035660/CsaV3_6G050140/CsaV3_5G036390/CsaV3_6G015970/CsaV3_1G030810/CsaV3_3G008830/CsaV3_1G001670/CsaV3_6G028570/CsaV3_3G036630/CsaV3_5G025240/CsaV3_3G014220/CsaV3_5G001220/CsaV3_5G002220/CsaV3_4G008470/CsaV3_2G016190/CsaV3_1G045940/CsaV3_6G017300/CsaV3_6G039130/CsaV3_4G023570/CsaV3_6G040090/CsaV3_5G008620/CsaV3_3G019900/CsaV3_6G020210/CsaV3_5G0…	CsaV3_3G046770/CsaV3_6G014350/CsaV3_5G032430/CsaV3_2G035660/CsaV3_6G050140/CsaV3_5G036390/CsaV3_6G015970/CsaV3_1G030810/CsaV3_3G008830/CsaV3_1G001670/CsaV3_6G028570/CsaV3_3G036630/CsaV3_5G025240/CsaV3_3G014220/CsaV3_5G001220/CsaV3_5G002220/CsaV3_4G008470/CsaV3_2G016190/CsaV3_1G045940/CsaV3_6G017300/CsaV3_6G039130/CsaV3_4G023570/CsaV3_6G040090/CsaV3_5G008620/CsaV3_3G019900/CsaV3_6G020210/CsaV3_5G0…	csv:101203062/csv:101221553/csv:101223010/csv:101208997/csv:101204759/csv:101207006/csv:101215209/csv:101220229/csv:101221190/csv:101210421/csv:101221014/csv:101205886/csv:101206294/csv:101219616/csv:101213539/csv:101210687/csv:101205082/csv:101220698/csv:101203654/csv:101216323/csv:101208947/csv:101205198/csv:101203488/csv:101202936/csv:105434867/csv:101218340/csv:101216007/csv:101218140/csv:101…	41	16	CsaV3_6G015970/CsaV3_1G030810/CsaV3_6G028570/CsaV3_5G025240/CsaV3_5G001220/CsaV3_4G008470/CsaV3_1G045940/CsaV3_6G017300/CsaV3_6G039130/CsaV3_5G008620/CsaV3_5G026770/CsaV3_6G017350/CsaV3_6G007200/CsaV3_4G007910/CsaV3_3G000620/CsaV3_1G009770	25	CsaV3_3G046770/CsaV3_6G014350/CsaV3_5G032430/CsaV3_2G035660/CsaV3_6G050140/CsaV3_5G036390/CsaV3_3G008830/CsaV3_1G001670/CsaV3_3G036630/CsaV3_3G014220/CsaV3_5G002220/CsaV3_2G016190/CsaV3_4G023570/CsaV3_6G040090/CsaV3_3G019900/CsaV3_6G020210/CsaV3_5G002660/CsaV3_4G023310/CsaV3_5G032450/CsaV3_5G000720/CsaV3_3G035510/CsaV3_6G000010/CsaV3_7G023260/CsaV3_4G008040/CsaV3_2G001130
csv00196	Photosynthesis - antenna proteins	8/1838	20/4193	0.713672	0.99997	CsaV3_6G005340/CsaV3_7G002620/CsaV3_4G026100/CsaV3_1G019610/CsaV3_6G051520/CsaV3_5G039350/CsaV3_1G005600/CsaV3_4G037740	CsaV3_6G005340/CsaV3_7G002620/CsaV3_4G026100/CsaV3_1G019610/CsaV3_6G051520/CsaV3_5G039350/CsaV3_1G005600/CsaV3_4G037740	csv:101204705/csv:101212963/csv:101208740/csv:101204705/csv:101221671/csv:101218137/csv:101218675/csv:101209460	8	7	CsaV3_6G005340/CsaV3_7G002620/CsaV3_4G026100/CsaV3_1G019610/CsaV3_6G051520/CsaV3_5G039350/CsaV3_1G005600	1	CsaV3_4G037740
csv04136	Autophagy - other	12/1838	30/4193	0.726921	0.99997	CsaV3_6G009210/CsaV3_1G000860/CsaV3_7G030480/CsaV3_2G034910/CsaV3_3G018020/CsaV3_3G034550/CsaV3_6G008640/CsaV3_4G031180/CsaV3_4G004080/CsaV3_3G022520/CsaV3_2G011360/CsaV3_3G018530	CsaV3_6G009210/CsaV3_1G000860/CsaV3_7G030480/CsaV3_2G034910/CsaV3_3G018020/CsaV3_3G034550/CsaV3_6G008640/CsaV3_4G031180/CsaV3_4G004080/CsaV3_3G022520/CsaV3_2G011360/CsaV3_3G018530	csv:101204045/csv:101219308/csv:101213890/csv:101217161/csv:101205497/csv:101221608/csv:101210427/csv:101204474/csv:101207356/csv:101215716/csv:101211819/csv:101223109	12	2	CsaV3_4G004080/CsaV3_3G018530	10	CsaV3_6G009210/CsaV3_1G000860/CsaV3_7G030480/CsaV3_2G034910/CsaV3_3G018020/CsaV3_3G034550/CsaV3_6G008640/CsaV3_4G031180/CsaV3_3G022520/CsaV3_2G011360
csv00562	Inositol phosphate metabolism	27/1838	66/4193	0.727155	0.99997	CsaV3_6G045630/CsaV3_2G030590/CsaV3_1G040000/CsaV3_6G037410/CsaV3_6G041580/CsaV3_7G034090/CsaV3_2G014550/CsaV3_3G048980/CsaV3_2G015690/CsaV3_5G010390/CsaV3_5G013590/CsaV3_3G008320/CsaV3_5G024510/CsaV3_1G017100/CsaV3_7G034100/CsaV3_2G036580/CsaV3_5G027710/CsaV3_4G031770/CsaV3_2G011000/CsaV3_2G014560/CsaV3_7G033950/CsaV3_5G010430/CsaV3_6G001840/CsaV3_6G016260/CsaV3_6G044860/CsaV3_7G021690/CsaV3_2G0…	CsaV3_6G045630/CsaV3_2G030590/CsaV3_1G040000/CsaV3_6G037410/CsaV3_6G041580/CsaV3_7G034090/CsaV3_2G014550/CsaV3_3G048980/CsaV3_2G015690/CsaV3_5G010390/CsaV3_5G013590/CsaV3_3G008320/CsaV3_5G024510/CsaV3_1G017100/CsaV3_7G034100/CsaV3_2G036580/CsaV3_5G027710/CsaV3_4G031770/CsaV3_2G011000/CsaV3_2G014560/CsaV3_7G033950/CsaV3_5G010430/CsaV3_6G001840/CsaV3_6G016260/CsaV3_6G044860/CsaV3_7G021690/CsaV3_2G0…	csv:101211833/csv:101206636/csv:101202978/csv:101215596/csv:101204881/csv:101209934/csv:101214424/csv:101211396/csv:101213372/csv:101221482/csv:101209281/csv:101212524/csv:101210353/csv:101217972/csv:101213518/csv:101223134/csv:101209319/csv:101218311/csv:101203226/csv:101214424/csv:101211666/csv:101205760/csv:101203631/csv:101211426/csv:101207178/csv:101202759/csv:101204839	27	9	CsaV3_6G045630/CsaV3_6G041580/CsaV3_2G015690/CsaV3_5G010390/CsaV3_3G008320/CsaV3_5G024510/CsaV3_4G031770/CsaV3_2G014560/CsaV3_6G001840	18	CsaV3_2G030590/CsaV3_1G040000/CsaV3_6G037410/CsaV3_7G034090/CsaV3_2G014550/CsaV3_3G048980/CsaV3_5G013590/CsaV3_1G017100/CsaV3_7G034100/CsaV3_2G036580/CsaV3_5G027710/CsaV3_2G011000/CsaV3_7G033950/CsaV3_5G010430/CsaV3_6G016260/CsaV3_6G044860/CsaV3_7G021690/CsaV3_2G032910
csv00052	Galactose metabolism	19/1838	47/4193	0.731431	0.99997	CsaV3_3G041600/CsaV3_1G008720/CsaV3_4G033560/CsaV3_1G004410/CsaV3_5G003160/CsaV3_1G026710/CsaV3_2G024360/CsaV3_6G048080/CsaV3_2G001860/CsaV3_5G005570/CsaV3_3G023460/CsaV3_3G037440/CsaV3_5G003970/CsaV3_3G043840/CsaV3_5G036760/CsaV3_6G044550/CsaV3_5G001840/CsaV3_6G048090/CsaV3_4G011820	CsaV3_3G041600/CsaV3_1G008720/CsaV3_4G033560/CsaV3_1G004410/CsaV3_5G003160/CsaV3_1G026710/CsaV3_2G024360/CsaV3_6G048080/CsaV3_2G001860/CsaV3_5G005570/CsaV3_3G023460/CsaV3_3G037440/CsaV3_5G003970/CsaV3_3G043840/CsaV3_5G036760/CsaV3_6G044550/CsaV3_5G001840/CsaV3_6G048090/CsaV3_4G011820	csv:101203750/csv:101204256/csv:101214893/csv:101222545/csv:101203400/csv:101203037/csv:101214883/csv:101211230/csv:101218300/csv:101209451/csv:101220704/csv:101223138/csv:101215227/csv:101204972/csv:101217833/csv:101219491/csv:101205820/csv:101211230/csv:101211538	19	12	CsaV3_3G041600/CsaV3_1G008720/CsaV3_1G004410/CsaV3_2G024360/CsaV3_5G005570/CsaV3_3G037440/CsaV3_5G003970/CsaV3_3G043840/CsaV3_5G036760/CsaV3_6G044550/CsaV3_5G001840/CsaV3_4G011820	7	CsaV3_4G033560/CsaV3_5G003160/CsaV3_1G026710/CsaV3_6G048080/CsaV3_2G001860/CsaV3_3G023460/CsaV3_6G048090
csv01210	2-Oxocarboxylic acid metabolism	19/1838	47/4193	0.731431	0.99997	CsaV3_7G005980/CsaV3_2G031570/CsaV3_3G035070/novel.389/novel.202/CsaV3_5G027250/CsaV3_6G044420/CsaV3_5G014440/CsaV3_4G027010/CsaV3_2G032340/CsaV3_5G014210/CsaV3_4G001800/CsaV3_1G000550/CsaV3_7G003590/CsaV3_1G044260/CsaV3_5G031200/CsaV3_7G032040/CsaV3_3G031010/CsaV3_5G004400	CsaV3_7G005980/CsaV3_2G031570/CsaV3_3G035070/-/-/CsaV3_5G027250/CsaV3_6G044420/CsaV3_5G014440/CsaV3_4G027010/CsaV3_2G032340/CsaV3_5G014210/CsaV3_4G001800/CsaV3_1G000550/CsaV3_7G003590/CsaV3_1G044260/CsaV3_5G031200/CsaV3_7G032040/CsaV3_3G031010/CsaV3_5G004400	csv:101213336/csv:101203871/csv:101222699/csv:101220538/csv:101210312/csv:101202770/csv:101217437/csv:101206329/csv:101209562/csv:101213342/csv:101212902/csv:101211790/csv:101213339/csv:101221392/csv:101208212/csv:101213570/csv:101211809/csv:101207254/csv:101222997	19	16	CsaV3_7G005980/CsaV3_2G031570/CsaV3_3G035070/novel.389/CsaV3_5G027250/CsaV3_6G044420/CsaV3_5G014440/CsaV3_4G027010/CsaV3_2G032340/CsaV3_5G014210/CsaV3_4G001800/CsaV3_7G003590/CsaV3_1G044260/CsaV3_7G032040/CsaV3_3G031010/CsaV3_5G004400	3	novel.202/CsaV3_1G000550/CsaV3_5G031200
csv00062	Fatty acid elongation	9/1838	23/4193	0.745449	0.99997	CsaV3_3G002510/CsaV3_3G012730/CsaV3_4G036210/CsaV3_3G006860/CsaV3_2G028690/CsaV3_5G004490/CsaV3_3G007660/CsaV3_3G043140/CsaV3_5G030680	CsaV3_3G002510/CsaV3_3G012730/CsaV3_4G036210/CsaV3_3G006860/CsaV3_2G028690/CsaV3_5G004490/CsaV3_3G007660/CsaV3_3G043140/CsaV3_5G030680	csv:101212007/csv:101219531/csv:101217359/csv:101214048/csv:101217470/csv:101222043/csv:101203776/csv:101221849/csv:101206427	9	6	CsaV3_4G036210/CsaV3_3G006860/CsaV3_5G004490/CsaV3_3G007660/CsaV3_3G043140/CsaV3_5G030680	3	CsaV3_3G002510/CsaV3_3G012730/CsaV3_2G028690
csv00750	Vitamin B6 metabolism	5/1838	13/4193	0.745825	0.99997	CsaV3_2G001290/CsaV3_3G047810/CsaV3_5G000200/CsaV3_7G034880/CsaV3_3G000370	CsaV3_2G001290/CsaV3_3G047810/CsaV3_5G000200/CsaV3_7G034880/CsaV3_3G000370	csv:101208070/csv:101207469/csv:101218000/csv:101217360/csv:101202934	5	3	CsaV3_3G047810/CsaV3_5G000200/CsaV3_3G000370	2	CsaV3_2G001290/CsaV3_7G034880
csv00564	Glycerophospholipid metabolism	37/1838	91/4193	0.764771	0.99997	CsaV3_3G026730/CsaV3_3G032790/CsaV3_2G028420/CsaV3_1G029760/CsaV3_5G026900/CsaV3_1G004330/CsaV3_5G004310/CsaV3_6G048540/CsaV3_3G009390/CsaV3_2G006790/CsaV3_5G034650/CsaV3_5G028680/CsaV3_4G032370/CsaV3_1G007140/CsaV3_1G042840/CsaV3_2G028530/CsaV3_3G005860/CsaV3_4G027880/CsaV3_3G048840/CsaV3_4G001340/CsaV3_4G024550/CsaV3_1G004320/CsaV3_4G002900/CsaV3_2G011000/CsaV3_2G024470/CsaV3_5G033710/CsaV3_1G0…	CsaV3_3G026730/CsaV3_3G032790/CsaV3_2G028420/CsaV3_1G029760/CsaV3_5G026900/CsaV3_1G004330/CsaV3_5G004310/CsaV3_6G048540/CsaV3_3G009390/CsaV3_2G006790/CsaV3_5G034650/CsaV3_5G028680/CsaV3_4G032370/CsaV3_1G007140/CsaV3_1G042840/CsaV3_2G028530/CsaV3_3G005860/CsaV3_4G027880/CsaV3_3G048840/CsaV3_4G001340/CsaV3_4G024550/CsaV3_1G004320/CsaV3_4G002900/CsaV3_2G011000/CsaV3_2G024470/CsaV3_5G033710/CsaV3_1G0…	csv:101216746/csv:101218126/csv:101220795/csv:101211291/csv:101218307/csv:101220267/csv:101203358/csv:101205782/csv:101209255/csv:101220522/csv:101216053/csv:101205141/csv:101220769/csv:101219872/csv:101213581/csv:101218421/csv:101208743/csv:101220288/csv:101213494/csv:101218579/csv:101210022/csv:101220498/csv:101216924/csv:101203226/csv:101213442/csv:101207886/csv:101205296/csv:101211426/csv:101…	37	10	CsaV3_1G004330/CsaV3_5G004310/CsaV3_1G007140/CsaV3_1G042840/CsaV3_4G001340/CsaV3_1G004320/CsaV3_2G024470/CsaV3_2G008470/CsaV3_6G049130/CsaV3_6G002870	27	CsaV3_3G026730/CsaV3_3G032790/CsaV3_2G028420/CsaV3_1G029760/CsaV3_5G026900/CsaV3_6G048540/CsaV3_3G009390/CsaV3_2G006790/CsaV3_5G034650/CsaV3_5G028680/CsaV3_4G032370/CsaV3_2G028530/CsaV3_3G005860/CsaV3_4G027880/CsaV3_3G048840/CsaV3_4G024550/CsaV3_4G002900/CsaV3_2G011000/CsaV3_5G033710/CsaV3_1G032230/CsaV3_6G016260/CsaV3_5G024850/CsaV3_5G011040/CsaV3_3G034040/CsaV3_5G034660/CsaV3_6G002500/CsaV3_2G0…
csv00130	Ubiquinone and other terpenoid-quinone biosynthesis	17/1838	43/4193	0.764848	0.99997	CsaV3_5G031500/CsaV3_2G036090/CsaV3_6G046030/CsaV3_2G014380/CsaV3_4G006210/CsaV3_2G036010/CsaV3_3G015670/CsaV3_2G009060/CsaV3_7G031610/CsaV3_3G038470/CsaV3_2G013820/CsaV3_4G032000/CsaV3_6G052370/CsaV3_1G009470/CsaV3_2G009070/CsaV3_6G016300/CsaV3_3G015650	CsaV3_5G031500/CsaV3_2G036090/CsaV3_6G046030/CsaV3_2G014380/CsaV3_4G006210/CsaV3_2G036010/CsaV3_3G015670/CsaV3_2G009060/CsaV3_7G031610/CsaV3_3G038470/CsaV3_2G013820/CsaV3_4G032000/CsaV3_6G052370/CsaV3_1G009470/CsaV3_2G009070/CsaV3_6G016300/CsaV3_3G015650	csv:101216706/csv:101221344/csv:101216659/csv:101211762/csv:101214174/csv:101205148/csv:101207188/csv:101205775/csv:101218361/csv:101215980/csv:101218864/csv:101215051/csv:101212842/csv:101211791/csv:101205537/csv:101211672/csv:101206950	17	8	CsaV3_5G031500/CsaV3_2G036090/CsaV3_4G006210/CsaV3_2G009060/CsaV3_3G038470/CsaV3_2G013820/CsaV3_6G052370/CsaV3_6G016300	9	CsaV3_6G046030/CsaV3_2G014380/CsaV3_2G036010/CsaV3_3G015670/CsaV3_7G031610/CsaV3_4G032000/CsaV3_1G009470/CsaV3_2G009070/CsaV3_3G015650
csv04141	Protein processing in endoplasmic reticulum	68/1838	165/4193	0.779775	0.99997	CsaV3_3G034390/CsaV3_7G029820/CsaV3_4G001560/CsaV3_2G028400/CsaV3_6G015540/CsaV3_1G010860/CsaV3_5G035180/CsaV3_6G009480/CsaV3_3G034400/CsaV3_3G023730/CsaV3_1G044020/CsaV3_6G034330/CsaV3_1G012230/CsaV3_2G029630/CsaV3_1G007480/CsaV3_6G024080/CsaV3_6G012970/CsaV3_5G002220/CsaV3_7G008470/CsaV3_1G035820/CsaV3_5G018740/CsaV3_3G000340/CsaV3_1G012800/CsaV3_7G022370/CsaV3_4G017580/CsaV3_1G024100/CsaV3_1G0…	CsaV3_3G034390/CsaV3_7G029820/CsaV3_4G001560/CsaV3_2G028400/CsaV3_6G015540/CsaV3_1G010860/CsaV3_5G035180/CsaV3_6G009480/CsaV3_3G034400/CsaV3_3G023730/CsaV3_1G044020/CsaV3_6G034330/CsaV3_1G012230/CsaV3_2G029630/CsaV3_1G007480/CsaV3_6G024080/CsaV3_6G012970/CsaV3_5G002220/CsaV3_7G008470/CsaV3_1G035820/CsaV3_5G018740/CsaV3_3G000340/CsaV3_1G012800/CsaV3_7G022370/CsaV3_4G017580/CsaV3_1G024100/CsaV3_1G0…	csv:101219630/csv:101202981/csv:101210969/csv:101221027/csv:101221066/csv:101212573/csv:101204918/csv:101220822/csv:101221835/csv:101205997/csv:101205422/csv:101216516/csv:101208731/csv:101203607/csv:101206027/csv:101210044/csv:101204208/csv:101210687/csv:101222781/csv:101204421/csv:101215867/csv:101203166/csv:101214582/csv:101209681/csv:101221877/csv:101210958/csv:101221822/csv:101205515/csv:101…	68	38	CsaV3_7G029820/CsaV3_6G015540/CsaV3_6G009480/CsaV3_3G023730/CsaV3_6G034330/CsaV3_2G029630/CsaV3_5G018740/CsaV3_3G000340/CsaV3_1G012800/CsaV3_7G022370/CsaV3_4G017580/CsaV3_1G024100/CsaV3_1G038710/CsaV3_2G006990/CsaV3_2G012310/CsaV3_6G017300/CsaV3_7G000800/CsaV3_6G031390/CsaV3_2G013200/CsaV3_2G019750/CsaV3_2G014400/CsaV3_3G032680/CsaV3_2G011210/CsaV3_6G039850/CsaV3_3G035900/CsaV3_1G038690/CsaV3_1G0…	30	CsaV3_3G034390/CsaV3_4G001560/CsaV3_2G028400/CsaV3_1G010860/CsaV3_5G035180/CsaV3_3G034400/CsaV3_1G044020/CsaV3_1G012230/CsaV3_1G007480/CsaV3_6G024080/CsaV3_6G012970/CsaV3_5G002220/CsaV3_7G008470/CsaV3_1G035820/CsaV3_5G028000/CsaV3_6G047890/CsaV3_1G001310/CsaV3_5G026520/CsaV3_2G004220/CsaV3_1G001780/CsaV3_7G029920/CsaV3_3G006720/CsaV3_1G035830/CsaV3_5G000720/CsaV3_6G042520/CsaV3_4G033770/CsaV3_1G0…
csv00970	Aminoacyl-tRNA biosynthesis	20/1838	51/4193	0.790577	0.99997	CsaV3_5G013970/CsaV3_5G015730/CsaV3_1G012830/CsaV3_6G048760/CsaV3_3G031480/CsaV3_3G046850/CsaV3_2G011140/CsaV3_1G039630/CsaV3_1G038230/CsaV3_2G033230/CsaV3_1G003150/CsaV3_4G003400/CsaV3_5G002780/CsaV3_5G005900/CsaV3_3G014640/CsaV3_4G003190/CsaV3_2G008510/CsaV3_5G026430/CsaV3_3G048470/CsaV3_2G009270	CsaV3_5G013970/CsaV3_5G015730/CsaV3_1G012830/CsaV3_6G048760/CsaV3_3G031480/CsaV3_3G046850/CsaV3_2G011140/CsaV3_1G039630/CsaV3_1G038230/CsaV3_2G033230/CsaV3_1G003150/CsaV3_4G003400/CsaV3_5G002780/CsaV3_5G005900/CsaV3_3G014640/CsaV3_4G003190/CsaV3_2G008510/CsaV3_5G026430/CsaV3_3G048470/CsaV3_2G009270	csv:101203909/csv:101212232/csv:101213618/csv:101211315/csv:101222905/csv:101222217/csv:101208697/csv:101217798/csv:101218513/csv:101221612/csv:101210257/csv:101211125/csv:101218148/csv:101207248/csv:101211723/csv:101212830/csv:101204394/csv:101210109/csv:101219148/csv:101213236	20	19	CsaV3_5G013970/CsaV3_5G015730/CsaV3_1G012830/CsaV3_6G048760/CsaV3_3G031480/CsaV3_3G046850/CsaV3_2G011140/CsaV3_1G039630/CsaV3_1G038230/CsaV3_2G033230/CsaV3_1G003150/CsaV3_4G003400/CsaV3_5G002780/CsaV3_5G005900/CsaV3_3G014640/CsaV3_4G003190/CsaV3_2G008510/CsaV3_3G048470/CsaV3_2G009270	1	CsaV3_5G026430
csv00330	Arginine and proline metabolism	22/1838	56/4193	0.795071	0.99997	CsaV3_2G015800/CsaV3_6G006290/CsaV3_2G015310/CsaV3_7G030830/CsaV3_6G001400/CsaV3_2G007750/CsaV3_7G000850/CsaV3_4G032140/CsaV3_2G007760/CsaV3_4G027860/CsaV3_4G014600/CsaV3_6G005510/CsaV3_4G027010/CsaV3_2G003820/CsaV3_5G005200/CsaV3_2G032340/CsaV3_1G007880/CsaV3_1G004640/CsaV3_3G028000/CsaV3_2G001470/CsaV3_4G005260/CsaV3_3G013880	CsaV3_2G015800/CsaV3_6G006290/CsaV3_2G015310/CsaV3_7G030830/CsaV3_6G001400/CsaV3_2G007750/CsaV3_7G000850/CsaV3_4G032140/CsaV3_2G007760/CsaV3_4G027860/CsaV3_4G014600/CsaV3_6G005510/CsaV3_4G027010/CsaV3_2G003820/CsaV3_5G005200/CsaV3_2G032340/CsaV3_1G007880/CsaV3_1G004640/CsaV3_3G028000/CsaV3_2G001470/CsaV3_4G005260/CsaV3_3G013880	csv:101214819/csv:101207674/csv:101204085/csv:101209263/csv:101210588/csv:101215844/csv:101205749/csv:101205765/csv:101207514/csv:101203976/csv:101217220/csv:101216328/csv:101209562/csv:101218099/csv:101215455/csv:101213342/csv:101214440/csv:101206436/csv:101212743/csv:101205432/csv:101221321/csv:101213486	22	15	CsaV3_2G015800/CsaV3_6G006290/CsaV3_6G001400/CsaV3_7G000850/CsaV3_4G027860/CsaV3_4G014600/CsaV3_6G005510/CsaV3_4G027010/CsaV3_2G003820/CsaV3_5G005200/CsaV3_2G032340/CsaV3_1G004640/CsaV3_3G028000/CsaV3_2G001470/CsaV3_3G013880	7	CsaV3_2G015310/CsaV3_7G030830/CsaV3_2G007750/CsaV3_4G032140/CsaV3_2G007760/CsaV3_1G007880/CsaV3_4G005260
csv00053	Ascorbate and aldarate metabolism	17/1838	44/4193	0.802104	0.99997	CsaV3_1G040000/CsaV3_6G033570/CsaV3_6G032490/CsaV3_5G002470/CsaV3_1G017100/CsaV3_6G034310/CsaV3_6G040510/CsaV3_5G027310/CsaV3_7G022020/CsaV3_2G004170/CsaV3_6G032500/CsaV3_1G042210/CsaV3_6G021870/CsaV3_4G005260/CsaV3_3G020840/CsaV3_4G008770/CsaV3_1G002780	CsaV3_1G040000/CsaV3_6G033570/CsaV3_6G032490/CsaV3_5G002470/CsaV3_1G017100/CsaV3_6G034310/CsaV3_6G040510/CsaV3_5G027310/CsaV3_7G022020/CsaV3_2G004170/CsaV3_6G032500/CsaV3_1G042210/CsaV3_6G021870/CsaV3_4G005260/CsaV3_3G020840/CsaV3_4G008770/CsaV3_1G002780	csv:101202978/csv:101203157/csv:101203157/csv:101214011/csv:101217972/csv:101216755/csv:101210277/csv:101203883/csv:101205337/csv:101222554/csv:101203157/csv:101215231/csv:101221563/csv:101221321/csv:101203335/csv:101222306/csv:101206505	17	9	CsaV3_6G033570/CsaV3_6G032490/CsaV3_5G002470/CsaV3_6G034310/CsaV3_6G040510/CsaV3_2G004170/CsaV3_6G032500/CsaV3_1G042210/CsaV3_6G021870	8	CsaV3_1G040000/CsaV3_1G017100/CsaV3_5G027310/CsaV3_7G022020/CsaV3_4G005260/CsaV3_3G020840/CsaV3_4G008770/CsaV3_1G002780
csv00520	Amino sugar and nucleotide sugar metabolism	46/1838	114/4193	0.803626	0.99997	CsaV3_6G048050/CsaV3_6G033570/CsaV3_2G007810/CsaV3_5G003160/CsaV3_6G006740/CsaV3_6G032490/CsaV3_1G028640/CsaV3_5G000810/CsaV3_3G020950/CsaV3_4G001060/CsaV3_2G014910/CsaV3_3G021590/CsaV3_3G032600/CsaV3_5G000830/CsaV3_4G035660/CsaV3_2G024360/CsaV3_5G008090/CsaV3_6G001370/CsaV3_2G009420/CsaV3_2G001860/CsaV3_7G002310/CsaV3_5G005570/CsaV3_1G036780/CsaV3_3G039800/CsaV3_2G010560/CsaV3_6G033720/CsaV3_3G0…	CsaV3_6G048050/CsaV3_6G033570/CsaV3_2G007810/CsaV3_5G003160/CsaV3_6G006740/CsaV3_6G032490/CsaV3_1G028640/CsaV3_5G000810/CsaV3_3G020950/CsaV3_4G001060/CsaV3_2G014910/CsaV3_3G021590/CsaV3_3G032600/CsaV3_5G000830/CsaV3_4G035660/CsaV3_2G024360/CsaV3_5G008090/CsaV3_6G001370/CsaV3_2G009420/CsaV3_2G001860/CsaV3_7G002310/CsaV3_5G005570/CsaV3_1G036780/CsaV3_3G039800/CsaV3_2G010560/CsaV3_6G033720/CsaV3_3G0…	csv:101214692/csv:101203157/csv:101214888/csv:101203400/csv:101213366/csv:101203157/csv:101214415/csv:101219497/csv:101223130/csv:101211214/csv:101208904/csv:101213621/csv:101211123/csv:101214593/csv:101208634/csv:101214883/csv:101219906/csv:101211496/csv:101211792/csv:101218300/csv:101216573/csv:101209451/csv:101222574/csv:101214861/csv:101222628/csv:101221070/csv:101208922/csv:101222554/csv:101…	46	23	CsaV3_6G033570/CsaV3_6G032490/CsaV3_2G014910/CsaV3_3G021590/CsaV3_3G032600/CsaV3_4G035660/CsaV3_2G024360/CsaV3_2G009420/CsaV3_7G002310/CsaV3_5G005570/CsaV3_2G010560/CsaV3_6G033720/CsaV3_2G004170/CsaV3_6G032500/CsaV3_3G039690/CsaV3_4G001030/CsaV3_6G044550/CsaV3_5G001840/CsaV3_1G006170/CsaV3_2G013100/CsaV3_2G028640/CsaV3_4G010130/CsaV3_2G030420	23	CsaV3_6G048050/CsaV3_2G007810/CsaV3_5G003160/CsaV3_6G006740/CsaV3_1G028640/CsaV3_5G000810/CsaV3_3G020950/CsaV3_4G001060/CsaV3_5G000830/CsaV3_5G008090/CsaV3_6G001370/CsaV3_2G001860/CsaV3_1G036780/CsaV3_3G039800/CsaV3_3G008480/CsaV3_1G028630/CsaV3_4G002630/CsaV3_1G029310/CsaV3_6G006000/CsaV3_4G008770/CsaV3_6G015080/CsaV3_1G002780/CsaV3_4G001040
csv00590	Arachidonic acid metabolism	5/1838	14/4193	0.810246	0.99997	CsaV3_6G045790/CsaV3_4G027880/CsaV3_5G030140/CsaV3_2G001680/novel.773	CsaV3_6G045790/CsaV3_4G027880/CsaV3_5G030140/CsaV3_2G001680/-	csv:101214973/csv:101220288/csv:101215260/csv:101221216/csv:101222193	5	1	novel.773	4	CsaV3_6G045790/CsaV3_4G027880/CsaV3_5G030140/CsaV3_2G001680
csv00410	beta-Alanine metabolism	16/1838	42/4193	0.818131	0.99997	CsaV3_6G038150/CsaV3_1G001170/CsaV3_5G003800/CsaV3_7G022600/CsaV3_7G030830/CsaV3_4G036550/CsaV3_4G032140/CsaV3_6G038140/CsaV3_5G017320/CsaV3_5G017290/CsaV3_4G031950/CsaV3_6G044860/CsaV3_1G005000/CsaV3_2G001470/CsaV3_4G005260/CsaV3_5G020650	CsaV3_6G038150/CsaV3_1G001170/CsaV3_5G003800/CsaV3_7G022600/CsaV3_7G030830/CsaV3_4G036550/CsaV3_4G032140/CsaV3_6G038140/CsaV3_5G017320/CsaV3_5G017290/CsaV3_4G031950/CsaV3_6G044860/CsaV3_1G005000/CsaV3_2G001470/CsaV3_4G005260/CsaV3_5G020650	csv:101222468/csv:101204200/csv:101212818/csv:101210998/csv:101209263/csv:101212576/csv:101205765/csv:101222232/csv:101214676/csv:101208026/csv:101215537/csv:101207178/csv:101210903/csv:101205432/csv:101221321/csv:101216119	16	8	CsaV3_6G038150/CsaV3_4G036550/CsaV3_6G038140/CsaV3_5G017320/CsaV3_4G031950/CsaV3_1G005000/CsaV3_2G001470/CsaV3_5G020650	8	CsaV3_1G001170/CsaV3_5G003800/CsaV3_7G022600/CsaV3_7G030830/CsaV3_4G032140/CsaV3_5G017290/CsaV3_6G044860/CsaV3_4G005260
csv00941	Flavonoid biosynthesis	6/1838	17/4193	0.830041	0.99997	CsaV3_5G010920/CsaV3_3G027830/CsaV3_5G030330/CsaV3_5G026140/CsaV3_2G009060/CsaV3_2G009070	CsaV3_5G010920/CsaV3_3G027830/CsaV3_5G030330/CsaV3_5G026140/CsaV3_2G009060/CsaV3_2G009070	csv:101218716/csv:101205211/csv:101212121/csv:101221017/csv:101205775/csv:101205537	6	4	CsaV3_5G010920/CsaV3_3G027830/CsaV3_5G026140/CsaV3_2G009060	2	CsaV3_5G030330/CsaV3_2G009070
csv00920	Sulfur metabolism	11/1838	30/4193	0.836019	0.99997	CsaV3_6G041580/CsaV3_6G000650/CsaV3_6G049640/CsaV3_1G010690/CsaV3_7G018620/CsaV3_6G048960/novel.86/CsaV3_6G047800/CsaV3_4G032640/CsaV3_3G041150/CsaV3_3G012820	CsaV3_6G041580/CsaV3_6G000650/CsaV3_6G049640/CsaV3_1G010690/CsaV3_7G018620/CsaV3_6G048960/-/CsaV3_6G047800/CsaV3_4G032640/CsaV3_3G041150/CsaV3_3G012820	csv:101204881/csv:101220896/csv:101212119/csv:101211864/csv:101213467/csv:101220567/csv:101218979/csv:101214370/csv:101221943/csv:101212851/csv:101221111	11	5	CsaV3_6G041580/CsaV3_6G000650/CsaV3_6G049640/CsaV3_4G032640/CsaV3_3G041150	6	CsaV3_1G010690/CsaV3_7G018620/CsaV3_6G048960/novel.86/CsaV3_6G047800/CsaV3_3G012820
csv04933	AGE-RAGE signaling pathway in diabetic complications	4/1838	837838	0.847474	0.99997	CsaV3_2G034580/CsaV3_1G012740/CsaV3_6G001840/CsaV3_2G024270	CsaV3_2G034580/CsaV3_1G012740/CsaV3_6G001840/CsaV3_2G024270	csv:101220160/csv:101218403/csv:101203631/csv:101216083	4	3	CsaV3_2G034580/CsaV3_1G012740/CsaV3_6G001840	1	CsaV3_2G024270
csv00565	Ether lipid metabolism	8/1838	23/4193	0.862198	0.99997	CsaV3_3G009390/CsaV3_2G006790/CsaV3_2G028530/CsaV3_4G027880/CsaV3_2G011000/CsaV3_2G024470/CsaV3_5G033710/CsaV3_6G016260	CsaV3_3G009390/CsaV3_2G006790/CsaV3_2G028530/CsaV3_4G027880/CsaV3_2G011000/CsaV3_2G024470/CsaV3_5G033710/CsaV3_6G016260	csv:101209255/csv:101220522/csv:101218421/csv:101220288/csv:101203226/csv:101213442/csv:101207886/csv:101211426	8	1	CsaV3_2G024470	7	CsaV3_3G009390/CsaV3_2G006790/CsaV3_2G028530/CsaV3_4G027880/CsaV3_2G011000/CsaV3_5G033710/CsaV3_6G016260
csv00730	Thiamine metabolism	8/1838	23/4193	0.862198	0.99997	CsaV3_1G009500/CsaV3_5G012850/CsaV3_3G011380/CsaV3_2G003460/CsaV3_6G032280/CsaV3_1G036050/CsaV3_1G000690/CsaV3_1G031250	CsaV3_1G009500/CsaV3_5G012850/CsaV3_3G011380/CsaV3_2G003460/CsaV3_6G032280/CsaV3_1G036050/CsaV3_1G000690/CsaV3_1G031250	csv:101214286/csv:101222631/csv:101219530/csv:101203230/csv:101206221/csv:101213554/csv:101216714/csv:101207760	8	6	CsaV3_1G009500/CsaV3_5G012850/CsaV3_3G011380/CsaV3_6G032280/CsaV3_1G036050/CsaV3_1G000690	2	CsaV3_2G003460/CsaV3_1G031250
csv03060	Protein export	16/1838	44/4193	0.876908	0.99997	CsaV3_2G028260/CsaV3_4G033950/CsaV3_5G030580/CsaV3_1G025510/CsaV3_2G002780/CsaV3_2G005090/CsaV3_1G034030/CsaV3_2G007560/CsaV3_5G008920/CsaV3_1G009720/CsaV3_5G031410/CsaV3_6G034140/CsaV3_6G051580/CsaV3_4G025830/CsaV3_2G013670/CsaV3_4G006570	CsaV3_2G028260/CsaV3_4G033950/CsaV3_5G030580/CsaV3_1G025510/CsaV3_2G002780/CsaV3_2G005090/CsaV3_1G034030/CsaV3_2G007560/CsaV3_5G008920/CsaV3_1G009720/CsaV3_5G031410/CsaV3_6G034140/CsaV3_6G051580/CsaV3_4G025830/CsaV3_2G013670/CsaV3_4G006570	csv:101222362/csv:101221060/csv:101207391/csv:101221060/csv:101222464/csv:101212303/csv:101217620/csv:101217753/csv:101215389/csv:101220011/csv:101218034/csv:101221795/csv:101209167/csv:101212893/csv:101215083/csv:101223070	16	12	CsaV3_5G030580/CsaV3_1G025510/CsaV3_2G002780/CsaV3_2G005090/CsaV3_1G034030/CsaV3_5G008920/CsaV3_1G009720/CsaV3_5G031410/CsaV3_6G051580/CsaV3_4G025830/CsaV3_2G013670/CsaV3_4G006570	4	CsaV3_2G028260/CsaV3_4G033950/CsaV3_2G007560/CsaV3_6G034140
csv00908	Zeatin biosynthesis	7/1838	21/4193	0.884661	0.99997	CsaV3_4G028960/CsaV3_4G036030/CsaV3_1G040510/CsaV3_5G006200/CsaV3_6G018570/CsaV3_4G008350/CsaV3_4G028950	CsaV3_4G028960/CsaV3_4G036030/CsaV3_1G040510/CsaV3_5G006200/CsaV3_6G018570/CsaV3_4G008350/CsaV3_4G028950	csv:101210219/csv:101217899/csv:101207014/csv:101205347/csv:101215150/csv:101207319/csv:101209480	7	2	CsaV3_4G028960/CsaV3_4G008350	5	CsaV3_4G036030/CsaV3_1G040510/CsaV3_5G006200/CsaV3_6G018570/CsaV3_4G028950
csv01040	Biosynthesis of unsaturated fatty acids	7/1838	21/4193	0.884661	0.99997	CsaV3_6G030990/CsaV3_2G010260/CsaV3_3G006860/CsaV3_3G028760/CsaV3_3G038870/CsaV3_2G011380/CsaV3_5G030680	CsaV3_6G030990/CsaV3_2G010260/CsaV3_3G006860/CsaV3_3G028760/CsaV3_3G038870/CsaV3_2G011380/CsaV3_5G030680	csv:101204316/csv:101217109/csv:101214048/csv:101208182/csv:101222623/csv:101212301/csv:101206427	7	6	CsaV3_6G030990/CsaV3_2G010260/CsaV3_3G006860/CsaV3_3G028760/CsaV3_3G038870/CsaV3_5G030680	1	CsaV3_2G011380
csv04070	Phosphatidylinositol signaling system	21/1838	57/4193	0.886671	0.99997	CsaV3_2G030590/CsaV3_6G037410/CsaV3_6G041580/CsaV3_2G014550/CsaV3_6G048540/CsaV3_3G048980/CsaV3_5G013590/CsaV3_3G008320/CsaV3_5G024510/CsaV3_1G017100/CsaV3_3G015240/CsaV3_3G005860/CsaV3_2G036580/CsaV3_4G027680/CsaV3_2G014560/CsaV3_7G033950/CsaV3_5G037850/CsaV3_6G001840/CsaV3_7G021690/CsaV3_2G013830/CsaV3_2G032910	CsaV3_2G030590/CsaV3_6G037410/CsaV3_6G041580/CsaV3_2G014550/CsaV3_6G048540/CsaV3_3G048980/CsaV3_5G013590/CsaV3_3G008320/CsaV3_5G024510/CsaV3_1G017100/CsaV3_3G015240/CsaV3_3G005860/CsaV3_2G036580/CsaV3_4G027680/CsaV3_2G014560/CsaV3_7G033950/CsaV3_5G037850/CsaV3_6G001840/CsaV3_7G021690/CsaV3_2G013830/CsaV3_2G032910	csv:101206636/csv:101215596/csv:101204881/csv:101214424/csv:101205782/csv:101211396/csv:101209281/csv:101212524/csv:101210353/csv:101217972/csv:101212685/csv:101208743/csv:101223134/csv:101205905/csv:101214424/csv:101211666/csv:101210866/csv:101203631/csv:101202759/csv:101218625/csv:101204839	21	6	CsaV3_6G041580/CsaV3_3G008320/CsaV3_5G024510/CsaV3_4G027680/CsaV3_2G014560/CsaV3_6G001840	15	CsaV3_2G030590/CsaV3_6G037410/CsaV3_2G014550/CsaV3_6G048540/CsaV3_3G048980/CsaV3_5G013590/CsaV3_1G017100/CsaV3_3G015240/CsaV3_3G005860/CsaV3_2G036580/CsaV3_7G033950/CsaV3_5G037850/CsaV3_7G021690/CsaV3_2G013830/CsaV3_2G032910
csv00240	Pyrimidine metabolism	17/1838	47/4193	0.888142	0.99997	CsaV3_1G002650/CsaV3_1G009350/CsaV3_2G001510/CsaV3_6G041780/CsaV3_3G011970/CsaV3_3G004920/CsaV3_2G028630/CsaV3_1G009660/CsaV3_6G042080/CsaV3_6G009390/CsaV3_3G027630/CsaV3_2G010660/CsaV3_3G016240/CsaV3_6G040600/CsaV3_3G007170/CsaV3_5G029640/CsaV3_6G006570	CsaV3_1G002650/CsaV3_1G009350/CsaV3_2G001510/CsaV3_6G041780/CsaV3_3G011970/CsaV3_3G004920/CsaV3_2G028630/CsaV3_1G009660/CsaV3_6G042080/CsaV3_6G009390/CsaV3_3G027630/CsaV3_2G010660/CsaV3_3G016240/CsaV3_6G040600/CsaV3_3G007170/CsaV3_5G029640/CsaV3_6G006570	csv:101204836/csv:101212831/csv:101204456/csv:101221565/csv:101207880/csv:101220705/csv:101218654/csv:101203823/csv:101210105/csv:101217271/csv:101222416/csv:101203551/csv:101217681/csv:101211263/csv:101217169/csv:101222857/csv:101223081	17	14	CsaV3_1G002650/CsaV3_1G009350/CsaV3_2G001510/CsaV3_6G041780/CsaV3_3G004920/CsaV3_2G028630/CsaV3_1G009660/CsaV3_6G042080/CsaV3_6G009390/CsaV3_3G027630/CsaV3_3G016240/CsaV3_6G040600/CsaV3_3G007170/CsaV3_5G029640	3	CsaV3_3G011970/CsaV3_2G010660/CsaV3_6G006570
csv00790	Folate biosynthesis	8/1838	24/4193	0.894955	0.99997	CsaV3_6G003290/CsaV3_6G051460/CsaV3_4G037860/CsaV3_5G030140/CsaV3_5G008630/CsaV3_6G013680/CsaV3_5G037300/CsaV3_7G025390	CsaV3_6G003290/CsaV3_6G051460/CsaV3_4G037860/CsaV3_5G030140/CsaV3_5G008630/CsaV3_6G013680/CsaV3_5G037300/CsaV3_7G025390	csv:101212510/csv:101207464/csv:101210375/csv:101215260/csv:101213228/csv:101220625/csv:101209617/csv:101210756	8	2	CsaV3_6G051460/CsaV3_5G008630	6	CsaV3_6G003290/CsaV3_4G037860/CsaV3_5G030140/CsaV3_6G013680/CsaV3_5G037300/CsaV3_7G025390
csv00513	Various types of N-glycan biosynthesis	11/1838	32/4193	0.897574	0.99997	CsaV3_7G002510/CsaV3_3G032600/CsaV3_1G007480/CsaV3_2G009420/CsaV3_1G024100/CsaV3_6G031390/CsaV3_2G014400/CsaV3_6G049210/CsaV3_4G033140/CsaV3_1G015830/CsaV3_3G001340	CsaV3_7G002510/CsaV3_3G032600/CsaV3_1G007480/CsaV3_2G009420/CsaV3_1G024100/CsaV3_6G031390/CsaV3_2G014400/CsaV3_6G049210/CsaV3_4G033140/CsaV3_1G015830/CsaV3_3G001340	csv:101213679/csv:101211123/csv:101206027/csv:101211792/csv:101210958/csv:101217990/csv:101209991/csv:101215332/csv:101208085/csv:101216794/csv:101204006	11	9	CsaV3_3G032600/CsaV3_2G009420/CsaV3_1G024100/CsaV3_6G031390/CsaV3_2G014400/CsaV3_6G049210/CsaV3_4G033140/CsaV3_1G015830/CsaV3_3G001340	2	CsaV3_7G002510/CsaV3_1G007480
csv00591	Linoleic acid metabolism	7/1838	22/4193	0.914095	0.99997	CsaV3_7G034390/CsaV3_2G005350/CsaV3_2G005370/CsaV3_4G023920/CsaV3_4G027880/CsaV3_4G023810/CsaV3_4G023910	CsaV3_7G034390/CsaV3_2G005350/CsaV3_2G005370/CsaV3_4G023920/CsaV3_4G027880/CsaV3_4G023810/CsaV3_4G023910	csv:101204952/csv:101208141/csv:101207901/csv:101214639/csv:101220288/csv:101216566/csv:101209531	7	3	CsaV3_2G005370/CsaV3_4G023920/CsaV3_4G023810	4	CsaV3_7G034390/CsaV3_2G005350/CsaV3_4G027880/CsaV3_4G023910
csv00040	Pentose and glucuronate interconversions	29/1838	79/4193	0.920596	0.99997	CsaV3_4G005340/CsaV3_6G033570/CsaV3_6G049200/CsaV3_6G032490/CsaV3_7G029590/CsaV3_6G023840/CsaV3_7G026200/CsaV3_7G026220/CsaV3_3G000050/CsaV3_3G016700/CsaV3_2G024360/CsaV3_3G016710/CsaV3_5G031360/CsaV3_1G009130/CsaV3_3G009850/CsaV3_4G025320/CsaV3_4G025310/CsaV3_1G039880/CsaV3_7G030240/CsaV3_4G031240/CsaV3_6G032500/CsaV3_2G008080/CsaV3_3G028700/CsaV3_4G024600/CsaV3_5G026870/CsaV3_4G008770/CsaV3_1G0…	CsaV3_4G005340/CsaV3_6G033570/CsaV3_6G049200/CsaV3_6G032490/CsaV3_7G029590/CsaV3_6G023840/CsaV3_7G026200/CsaV3_7G026220/CsaV3_3G000050/CsaV3_3G016700/CsaV3_2G024360/CsaV3_3G016710/CsaV3_5G031360/CsaV3_1G009130/CsaV3_3G009850/CsaV3_4G025320/CsaV3_4G025310/CsaV3_1G039880/CsaV3_7G030240/CsaV3_4G031240/CsaV3_6G032500/CsaV3_2G008080/CsaV3_3G028700/CsaV3_4G024600/CsaV3_5G026870/CsaV3_4G008770/CsaV3_1G0…	csv:101222494/csv:101203157/csv:101216377/csv:101203157/csv:101205321/csv:101221958/csv:101221055/csv:101220821/csv:101207185/csv:101221918/csv:101214883/csv:101221690/csv:101212122/csv:101209736/csv:101217635/csv:101203731/csv:101210436/csv:101215894/csv:101217414/csv:101221903/csv:101203157/csv:101209640/csv:101207204/csv:101219724/csv:101217834/csv:101222306/csv:101206505/csv:101218812/csv:101…	29	13	CsaV3_4G005340/CsaV3_6G033570/CsaV3_6G049200/CsaV3_6G032490/CsaV3_2G024360/CsaV3_5G031360/CsaV3_1G009130/CsaV3_4G025320/CsaV3_1G039880/CsaV3_6G032500/CsaV3_3G028700/CsaV3_1G007900/CsaV3_5G035910	16	CsaV3_7G029590/CsaV3_6G023840/CsaV3_7G026200/CsaV3_7G026220/CsaV3_3G000050/CsaV3_3G016700/CsaV3_3G016710/CsaV3_3G009850/CsaV3_4G025310/CsaV3_7G030240/CsaV3_4G031240/CsaV3_2G008080/CsaV3_4G024600/CsaV3_5G026870/CsaV3_4G008770/CsaV3_1G002780
csv04146	Peroxisome	27/1838	74/4193	0.920699	0.99997	CsaV3_6G014940/CsaV3_1G004740/CsaV3_1G039270/CsaV3_4G028240/CsaV3_5G002040/CsaV3_6G014400/CsaV3_1G043170/CsaV3_5G027250/CsaV3_1G042760/CsaV3_4G002560/CsaV3_1G004130/CsaV3_6G031490/CsaV3_3G023830/CsaV3_1G045840/CsaV3_1G039510/CsaV3_3G006080/CsaV3_1G033470/CsaV3_3G028760/CsaV3_3G002720/CsaV3_2G011380/CsaV3_6G001070/CsaV3_3G030850/CsaV3_2G012630/CsaV3_6G038810/CsaV3_4G004420/CsaV3_4G013220/CsaV3_6G0…	CsaV3_6G014940/CsaV3_1G004740/CsaV3_1G039270/CsaV3_4G028240/CsaV3_5G002040/CsaV3_6G014400/CsaV3_1G043170/CsaV3_5G027250/CsaV3_1G042760/CsaV3_4G002560/CsaV3_1G004130/CsaV3_6G031490/CsaV3_3G023830/CsaV3_1G045840/CsaV3_1G039510/CsaV3_3G006080/CsaV3_1G033470/CsaV3_3G028760/CsaV3_3G002720/CsaV3_2G011380/CsaV3_6G001070/CsaV3_3G030850/CsaV3_2G012630/CsaV3_6G038810/CsaV3_4G004420/CsaV3_4G013220/CsaV3_6G0…	csv:101209297/csv:101207896/csv:101211319/csv:101218462/csv:101209130/csv:101221780/csv:101217893/csv:101202770/csv:101211977/csv:101221260/csv:101216945/csv:101216662/csv:101208029/csv:101214017/csv:101215417/csv:101205134/csv:101207364/csv:101208182/csv:101220303/csv:101212301/csv:101212704/csv:101205206/csv:101206548/csv:101203798/csv:101222338/csv:101222901/csv:101203578	27	12	CsaV3_6G014940/CsaV3_1G004740/CsaV3_1G039270/CsaV3_4G028240/CsaV3_6G014400/CsaV3_5G027250/CsaV3_1G045840/CsaV3_1G039510/CsaV3_1G033470/CsaV3_3G028760/CsaV3_3G030850/CsaV3_4G004420	15	CsaV3_5G002040/CsaV3_1G043170/CsaV3_1G042760/CsaV3_4G002560/CsaV3_1G004130/CsaV3_6G031490/CsaV3_3G023830/CsaV3_3G006080/CsaV3_3G002720/CsaV3_2G011380/CsaV3_6G001070/CsaV3_2G012630/CsaV3_6G038810/CsaV3_4G013220/CsaV3_6G005940
csv00945	Stilbenoid, diarylheptanoid and gingerol biosynthesis	3/1838	837808	0.924676	0.99997	CsaV3_5G030330/CsaV3_2G009060/CsaV3_2G009070	CsaV3_5G030330/CsaV3_2G009060/CsaV3_2G009070	csv:101212121/csv:101205775/csv:101205537	3	1	CsaV3_2G009060	2	CsaV3_5G030330/CsaV3_2G009070
csv00900	Terpenoid backbone biosynthesis	17/1838	49/4193	0.926637	0.99997	CsaV3_4G006100/CsaV3_7G016180/CsaV3_6G009990/CsaV3_7G023860/CsaV3_4G007960/CsaV3_5G014680/CsaV3_1G001500/CsaV3_7G021880/CsaV3_1G002370/CsaV3_1G041900/CsaV3_3G020450/CsaV3_1G031250/CsaV3_7G006800/CsaV3_3G006740/CsaV3_6G035980/CsaV3_3G003490/CsaV3_4G034210	CsaV3_4G006100/CsaV3_7G016180/CsaV3_6G009990/CsaV3_7G023860/CsaV3_4G007960/CsaV3_5G014680/CsaV3_1G001500/CsaV3_7G021880/CsaV3_1G002370/CsaV3_1G041900/CsaV3_3G020450/CsaV3_1G031250/CsaV3_7G006800/CsaV3_3G006740/CsaV3_6G035980/CsaV3_3G003490/CsaV3_4G034210	csv:101212970/csv:101210057/csv:101213994/csv:101217388/csv:101214140/csv:101210090/csv:101207716/csv:101204450/csv:101221755/csv:101221308/csv:101206540/csv:101207760/csv:101205649/csv:101212112/csv:101210779/csv:101208259/csv:101223178	17	9	CsaV3_4G006100/CsaV3_7G016180/CsaV3_7G023860/CsaV3_1G001500/CsaV3_1G002370/CsaV3_1G041900/CsaV3_3G006740/CsaV3_3G003490/CsaV3_4G034210	8	CsaV3_6G009990/CsaV3_4G007960/CsaV3_5G014680/CsaV3_7G021880/CsaV3_3G020450/CsaV3_1G031250/CsaV3_7G006800/CsaV3_6G035980
csv00670	One carbon pool by folate	5/1838	17/4193	0.928622	0.99997	CsaV3_4G028640/CsaV3_6G005110/CsaV3_1G010620/CsaV3_6G005120/CsaV3_1G042270	CsaV3_4G028640/CsaV3_6G005110/CsaV3_1G010620/CsaV3_6G005120/CsaV3_1G042270	csv:101215287/csv:101222878/csv:101209820/csv:101222878/csv:101216190	5	4	CsaV3_6G005110/CsaV3_1G010620/CsaV3_6G005120/CsaV3_1G042270	1	CsaV3_4G028640
csv03040	Spliceosome	61/1838	159/4193	0.933658	0.99997	CsaV3_2G003560/CsaV3_3G032260/CsaV3_7G021700/CsaV3_6G052680/CsaV3_6G040740/CsaV3_2G002790/CsaV3_3G007250/CsaV3_7G005550/CsaV3_5G006650/CsaV3_1G004710/CsaV3_3G004540/CsaV3_1G014700/CsaV3_7G006480/CsaV3_2G017010/CsaV3_1G007610/CsaV3_1G002940/CsaV3_7G027360/CsaV3_7G031130/CsaV3_UNG075590/CsaV3_1G017170/CsaV3_4G037220/CsaV3_1G043080/CsaV3_4G000860/CsaV3_5G030120/CsaV3_3G036230/CsaV3_6G007610/CsaV3_3G…	CsaV3_2G003560/CsaV3_3G032260/CsaV3_7G021700/CsaV3_6G052680/CsaV3_6G040740/CsaV3_2G002790/CsaV3_3G007250/CsaV3_7G005550/CsaV3_5G006650/CsaV3_1G004710/CsaV3_3G004540/CsaV3_1G014700/CsaV3_7G006480/CsaV3_2G017010/CsaV3_1G007610/CsaV3_1G002940/CsaV3_7G027360/CsaV3_7G031130/CsaV3_UNG075590/CsaV3_1G017170/CsaV3_4G037220/CsaV3_1G043080/CsaV3_4G000860/CsaV3_5G030120/CsaV3_3G036230/CsaV3_6G007610/CsaV3_3G…	csv:101210594/csv:101206321/csv:101221293/csv:101207463/csv:101214972/csv:101222939/csv:101218026/csv:101216712/csv:101203903/csv:101207648/csv:101222113/csv:101221461/csv:101219227/csv:101207116/csv:101208137/csv:101218446/csv:101204563/csv:101205556/csv:101221493/csv:101218920/csv:101222727/csv:101216950/csv:101205303/csv:101216854/csv:101202831/csv:101203800/csv:101222664/csv:101221953/csv:101…	61	35	CsaV3_2G003560/CsaV3_3G032260/CsaV3_7G021700/CsaV3_6G052680/CsaV3_6G040740/CsaV3_2G002790/CsaV3_3G007250/CsaV3_5G006650/CsaV3_1G004710/CsaV3_1G014700/CsaV3_1G007610/CsaV3_1G002940/CsaV3_7G031130/CsaV3_UNG075590/CsaV3_1G017170/CsaV3_4G037220/CsaV3_1G043080/CsaV3_4G000860/CsaV3_5G030120/CsaV3_3G036230/CsaV3_6G007610/CsaV3_1G036310/CsaV3_2G011210/CsaV3_7G023900/CsaV3_2G032030/CsaV3_1G045350/CsaV3_2G…	26	CsaV3_7G005550/CsaV3_3G004540/CsaV3_7G006480/CsaV3_2G017010/CsaV3_7G027360/CsaV3_3G031460/CsaV3_1G033610/CsaV3_5G006530/CsaV3_4G001320/CsaV3_5G031610/CsaV3_3G038510/CsaV3_4G037710/CsaV3_5G026520/CsaV3_6G017140/CsaV3_2G006940/CsaV3_2G016150/CsaV3_3G042630/CsaV3_1G043660/CsaV3_5G040300/CsaV3_7G031760/CsaV3_5G039780/CsaV3_3G014050/CsaV3_5G020660/CsaV3_3G015510/CsaV3_7G030160/CsaV3_4G008320
csv00561	Glycerolipid metabolism	23/1838	65/4193	0.935608	0.99997	CsaV3_2G028420/CsaV3_2G030770/CsaV3_1G010300/CsaV3_2G003280/CsaV3_5G034650/CsaV3_4G035660/CsaV3_6G041120/CsaV3_1G042840/CsaV3_3G005860/CsaV3_4G027880/CsaV3_3G048840/CsaV3_4G025320/CsaV3_4G025310/CsaV3_3G009130/CsaV3_4G024550/CsaV3_3G015560/CsaV3_2G008470/CsaV3_3G034040/CsaV3_5G034660/CsaV3_5G006640/CsaV3_2G033910/CsaV3_4G005260/CsaV3_7G032210	CsaV3_2G028420/CsaV3_2G030770/CsaV3_1G010300/CsaV3_2G003280/CsaV3_5G034650/CsaV3_4G035660/CsaV3_6G041120/CsaV3_1G042840/CsaV3_3G005860/CsaV3_4G027880/CsaV3_3G048840/CsaV3_4G025320/CsaV3_4G025310/CsaV3_3G009130/CsaV3_4G024550/CsaV3_3G015560/CsaV3_2G008470/CsaV3_3G034040/CsaV3_5G034660/CsaV3_5G006640/CsaV3_2G033910/CsaV3_4G005260/CsaV3_7G032210	csv:101220795/csv:101218489/csv:101208763/csv:101215352/csv:101216053/csv:101208634/csv:101218383/csv:101213581/csv:101208743/csv:101220288/csv:101213494/csv:101203731/csv:101210436/csv:101204668/csv:101210022/csv:101205287/csv:101204879/csv:101214865/csv:101215334/csv:101204152/csv:101213816/csv:101221321/csv:101210335	23	6	CsaV3_4G035660/CsaV3_1G042840/CsaV3_4G025320/CsaV3_3G009130/CsaV3_2G008470/CsaV3_5G006640	17	CsaV3_2G028420/CsaV3_2G030770/CsaV3_1G010300/CsaV3_2G003280/CsaV3_5G034650/CsaV3_6G041120/CsaV3_3G005860/CsaV3_4G027880/CsaV3_3G048840/CsaV3_4G025310/CsaV3_4G024550/CsaV3_3G015560/CsaV3_3G034040/CsaV3_5G034660/CsaV3_2G033910/CsaV3_4G005260/CsaV3_7G032210
csv00510	N-Glycan biosynthesis	14/1838	42/4193	0.939188	0.99997	CsaV3_5G031040/CsaV3_7G002510/CsaV3_1G007480/CsaV3_1G013400/CsaV3_1G024100/CsaV3_5G027050/CsaV3_6G031390/CsaV3_2G019750/CsaV3_2G014400/CsaV3_6G049210/CsaV3_4G033140/CsaV3_1G015830/CsaV3_5G026660/CsaV3_3G001340	CsaV3_5G031040/CsaV3_7G002510/CsaV3_1G007480/CsaV3_1G013400/CsaV3_1G024100/CsaV3_5G027050/CsaV3_6G031390/CsaV3_2G019750/CsaV3_2G014400/CsaV3_6G049210/CsaV3_4G033140/CsaV3_1G015830/CsaV3_5G026660/CsaV3_3G001340	csv:101222690/csv:101213679/csv:101206027/csv:101218949/csv:101210958/csv:101220682/csv:101217990/csv:101208414/csv:101209991/csv:101215332/csv:101208085/csv:101216794/csv:101213832/csv:101204006	14	9	CsaV3_1G024100/CsaV3_5G027050/CsaV3_6G031390/CsaV3_2G019750/CsaV3_2G014400/CsaV3_6G049210/CsaV3_4G033140/CsaV3_1G015830/CsaV3_3G001340	5	CsaV3_5G031040/CsaV3_7G002510/CsaV3_1G007480/CsaV3_1G013400/CsaV3_5G026660
csv00531	Glycosaminoglycan degradation	4/1838	15/4193	0.949155	0.99997	CsaV3_2G003320/CsaV3_3G032600/CsaV3_2G009420/CsaV3_3G043840	CsaV3_2G003320/CsaV3_3G032600/CsaV3_2G009420/CsaV3_3G043840	csv:101213905/csv:101211123/csv:101211792/csv:101204972	4	4	CsaV3_2G003320/CsaV3_3G032600/CsaV3_2G009420/CsaV3_3G043840	0
csv00910	Nitrogen metabolism	10/1838	32/4193	0.949361	0.99997	CsaV3_5G031570/CsaV3_6G043980/CsaV3_2G030320/CsaV3_5G005130/CsaV3_4G013280/CsaV3_5G023920/CsaV3_4G014780/CsaV3_3G018610/CsaV3_5G023360/CsaV3_6G039990	CsaV3_5G031570/CsaV3_6G043980/CsaV3_2G030320/CsaV3_5G005130/CsaV3_4G013280/CsaV3_5G023920/CsaV3_4G014780/CsaV3_3G018610/CsaV3_5G023360/CsaV3_6G039990	csv:101215090/csv:101206142/csv:101212995/csv:101218466/csv:101221948/csv:101215515/csv:101214659/csv:101217505/csv:101219000/csv:101202774	10	2	CsaV3_4G013280/CsaV3_3G018610	8	CsaV3_5G031570/CsaV3_6G043980/CsaV3_2G030320/CsaV3_5G005130/CsaV3_5G023920/CsaV3_4G014780/CsaV3_5G023360/CsaV3_6G039990
csv00909	Sesquiterpenoid and triterpenoid biosynthesis	5/1838	18/4193	0.949895	0.99997	CsaV3_3G003660/CsaV3_3G003670/CsaV3_4G035350/CsaV3_4G034210/CsaV3_1G011400	CsaV3_3G003660/CsaV3_3G003670/CsaV3_4G035350/CsaV3_4G034210/CsaV3_1G011400	csv:101202882/csv:101202882/csv:101204949/csv:101223178/csv:101204794	5	1	CsaV3_4G034210	4	CsaV3_3G003660/CsaV3_3G003670/CsaV3_4G035350/CsaV3_1G011400
csv03020	RNA polymerase	13/1838	41/4193	0.960082	0.99997	CsaV3_1G040840/CsaV3_7G030940/CsaV3_3G046320/CsaV3_6G048110/novel.326/CsaV3_2G010370/CsaV3_3G004150/CsaV3_4G004060/CsaV3_5G031450/CsaV3_4G002660/CsaV3_5G039120/CsaV3_7G035230/CsaV3_3G039160	CsaV3_1G040840/CsaV3_7G030940/CsaV3_3G046320/CsaV3_6G048110/-/CsaV3_2G010370/CsaV3_3G004150/CsaV3_4G004060/CsaV3_5G031450/CsaV3_4G002660/CsaV3_5G039120/CsaV3_7G035230/CsaV3_3G039160	csv:101209454/csv:101208535/csv:101209100/csv:101213971/csv:101211228/csv:101218763/csv:101203505/csv:101207602/csv:101211391/csv:101220087/csv:101213105/csv:101204777/csv:101205880	13	10	CsaV3_1G040840/CsaV3_7G030940/CsaV3_3G046320/CsaV3_6G048110/novel.326/CsaV3_2G010370/CsaV3_3G004150/CsaV3_4G002660/CsaV3_5G039120/CsaV3_3G039160	3	CsaV3_4G004060/CsaV3_5G031450/CsaV3_7G035230
csv02010	ABC transporters	6/1838	22/4193	0.965788	0.99997	CsaV3_3G048950/CsaV3_5G026260/CsaV3_5G005630/CsaV3_6G052240/CsaV3_2G009630/CsaV3_1G039760	CsaV3_3G048950/CsaV3_5G026260/CsaV3_5G005630/CsaV3_6G052240/CsaV3_2G009630/CsaV3_1G039760	csv:101219304/csv:101219839/csv:101211598/csv:101209905/csv:101209574/csv:101214695	6	1	CsaV3_3G048950	5	CsaV3_5G026260/CsaV3_5G005630/CsaV3_6G052240/CsaV3_2G009630/CsaV3_1G039760
csv00592	alpha-Linolenic acid metabolism	21/1838	63/4193	0.967012	0.99997	CsaV3_5G023060/CsaV3_7G034390/CsaV3_7G024950/CsaV3_2G028330/CsaV3_7G026290/CsaV3_1G004200/CsaV3_4G023920/CsaV3_4G027880/CsaV3_7G024960/CsaV3_2G033050/CsaV3_4G023810/CsaV3_6G022310/CsaV3_4G037110/CsaV3_7G024990/CsaV3_3G028760/CsaV3_2G011380/CsaV3_5G017240/CsaV3_3G042120/CsaV3_6G024070/CsaV3_7G006690/CsaV3_4G023910	CsaV3_5G023060/CsaV3_7G034390/CsaV3_7G024950/CsaV3_2G028330/CsaV3_7G026290/CsaV3_1G004200/CsaV3_4G023920/CsaV3_4G027880/CsaV3_7G024960/CsaV3_2G033050/CsaV3_4G023810/CsaV3_6G022310/CsaV3_4G037110/CsaV3_7G024990/CsaV3_3G028760/CsaV3_2G011380/CsaV3_5G017240/CsaV3_3G042120/CsaV3_6G024070/CsaV3_7G006690/CsaV3_4G023910	csv:101222233/csv:101204952/csv:101209854/csv:101221732/csv:101209067/csv:101218599/csv:101214639/csv:101220288/csv:101206036/csv:101203714/csv:101216566/csv:101210295/csv:101221396/csv:101206036/csv:101208182/csv:101212301/csv:101209722/csv:101218631/csv:101218899/csv:101218180/csv:101209531	21	9	CsaV3_7G024950/CsaV3_4G023920/CsaV3_7G024960/CsaV3_4G023810/CsaV3_7G024990/CsaV3_3G028760/CsaV3_3G042120/CsaV3_6G024070/CsaV3_7G006690	12	CsaV3_5G023060/CsaV3_7G034390/CsaV3_2G028330/CsaV3_7G026290/CsaV3_1G004200/CsaV3_4G027880/CsaV3_2G033050/CsaV3_6G022310/CsaV3_4G037110/CsaV3_2G011380/CsaV3_5G017240/CsaV3_4G023910
csv00190	Oxidative phosphorylation	51/1838	141/4193	0.975289	0.99997	CsaV3_2G008520/CsaV3_4G001330/CsaV3_UNG208980/CsaV3_6G007320/CsaV3_4G024730/CsaV3_6G002740/CsaV3_3G039600/CsaV3_5G024920/CsaV3_5G034810/CsaV3_1G005960/CsaV3_3G017590/CsaV3_5G015950/CsaV3_5G028650/CsaV3_3G010390/CsaV3_3G047070/CsaV3_2G029850/CsaV3_3G010470/CsaV3_7G007250/CsaV3_1G010750/CsaV3_5G037860/CsaV3_2G012290/CsaV3_4G005080/CsaV3_3G017880/CsaV3_UNG208730/CsaV3_1G040420/CsaV3_5G005640/CsaV3_4…	CsaV3_2G008520/CsaV3_4G001330/CsaV3_UNG208980/CsaV3_6G007320/CsaV3_4G024730/CsaV3_6G002740/CsaV3_3G039600/CsaV3_5G024920/CsaV3_5G034810/CsaV3_1G005960/CsaV3_3G017590/CsaV3_5G015950/CsaV3_5G028650/CsaV3_3G010390/CsaV3_3G047070/CsaV3_2G029850/CsaV3_3G010470/CsaV3_7G007250/CsaV3_1G010750/CsaV3_5G037860/CsaV3_2G012290/CsaV3_4G005080/CsaV3_3G017880/CsaV3_UNG208730/CsaV3_1G040420/CsaV3_5G005640/CsaV3_4…	csv:101221564/csv:101218811/csv:3429253/csv:101207411/csv:101217432/csv:101211740/csv:101211235/csv:101222955/csv:101213164/csv:101222697/csv:101209685/csv:11123896/csv:101205618/csv:101205156/csv:101219224/csv:101219522/csv:101206104/csv:101207157/csv:101214408/csv:101211115/csv:101210459/csv:101211616/csv:101205189/csv:11123870/csv:101208426/csv:101211349/csv:101207001/csv:101214655/csv:1012063…	51	41	CsaV3_4G001330/CsaV3_UNG208980/CsaV3_6G007320/CsaV3_6G002740/CsaV3_3G039600/CsaV3_5G024920/CsaV3_5G034810/CsaV3_1G005960/CsaV3_3G017590/CsaV3_5G028650/CsaV3_3G010390/CsaV3_3G047070/CsaV3_2G029850/CsaV3_3G010470/CsaV3_7G007250/CsaV3_2G012290/CsaV3_4G005080/CsaV3_3G017880/CsaV3_5G005640/CsaV3_4G035540/CsaV3_1G028620/CsaV3_7G031080/CsaV3_2G015290/CsaV3_4G000760/CsaV3_5G036470/CsaV3_3G010400/CsaV3_3G…	10	CsaV3_2G008520/CsaV3_4G024730/CsaV3_5G015950/CsaV3_1G010750/CsaV3_5G037860/CsaV3_UNG208730/CsaV3_1G040420/CsaV3_5G015800/CsaV3_3G046610/CsaV3_3G026760
csv00904	Diterpenoid biosynthesis	6/1838	23/4193	0.976019	0.99997	CsaV3_3G010170/CsaV3_3G001930/CsaV3_1G011060/CsaV3_3G049380/CsaV3_3G016600/CsaV3_3G049400	CsaV3_3G010170/CsaV3_3G001930/CsaV3_1G011060/CsaV3_3G049380/CsaV3_3G016600/CsaV3_3G049400	csv:101221667/csv:101208903/csv:101220719/csv:101206553/csv:101212262/csv:101206798	6	3	CsaV3_3G010170/CsaV3_3G001930/CsaV3_3G016600	3	CsaV3_1G011060/CsaV3_3G049380/CsaV3_3G049400
csv00100	Steroid biosynthesis	7/1838	26/4193	0.976419	0.99997	CsaV3_6G051670/CsaV3_4G027880/CsaV3_4G035350/CsaV3_7G030530/CsaV3_4G028790/CsaV3_6G031840/CsaV3_4G002070	CsaV3_6G051670/CsaV3_4G027880/CsaV3_4G035350/CsaV3_7G030530/CsaV3_4G028790/CsaV3_6G031840/CsaV3_4G002070	csv:101221194/csv:101220288/csv:101204949/csv:101213648/csv:101204738/csv:101205275/csv:101206897	7	5	CsaV3_6G051670/CsaV3_7G030530/CsaV3_4G028790/CsaV3_6G031840/CsaV3_4G002070	2	CsaV3_4G027880/CsaV3_4G035350
csv03015	mRNA surveillance pathway	33/1838	96/4193	0.977866	0.99997	CsaV3_4G031880/CsaV3_3G017220/CsaV3_3G007250/CsaV3_7G031350/CsaV3_2G009710/CsaV3_5G037880/CsaV3_1G004910/CsaV3_6G040010/CsaV3_1G043080/CsaV3_1G007000/CsaV3_6G004530/CsaV3_6G045300/CsaV3_3G046990/CsaV3_3G009410/CsaV3_5G029980/CsaV3_3G031460/CsaV3_1G033610/CsaV3_4G025970/CsaV3_7G035250/CsaV3_2G030670/CsaV3_1G037370/CsaV3_2G025230/CsaV3_6G017140/CsaV3_2G032030/CsaV3_4G024700/CsaV3_1G006160/CsaV3_1G0…	CsaV3_4G031880/CsaV3_3G017220/CsaV3_3G007250/CsaV3_7G031350/CsaV3_2G009710/CsaV3_5G037880/CsaV3_1G004910/CsaV3_6G040010/CsaV3_1G043080/CsaV3_1G007000/CsaV3_6G004530/CsaV3_6G045300/CsaV3_3G046990/CsaV3_3G009410/CsaV3_5G029980/CsaV3_3G031460/CsaV3_1G033610/CsaV3_4G025970/CsaV3_7G035250/CsaV3_2G030670/CsaV3_1G037370/CsaV3_2G025230/CsaV3_6G017140/CsaV3_2G032030/CsaV3_4G024700/CsaV3_1G006160/CsaV3_1G0…	csv:101216970/csv:101215673/csv:101218026/csv:101222300/csv:101220950/csv:101211613/csv:101210167/csv:101203247/csv:101216950/csv:101217809/csv:101213190/csv:101206937/csv:101219939/csv:101209745/csv:101221902/csv:101222664/csv:101221953/csv:101209960/csv:101204291/csv:101205459/csv:101215977/csv:101203485/csv:101217986/csv:101217346/csv:101218139/csv:101206503/csv:101215977/csv:101220043/csv:101…	33	20	CsaV3_4G031880/CsaV3_3G017220/CsaV3_3G007250/CsaV3_7G031350/CsaV3_2G009710/CsaV3_5G037880/CsaV3_1G004910/CsaV3_1G043080/CsaV3_1G007000/CsaV3_6G004530/CsaV3_6G045300/CsaV3_3G046990/CsaV3_3G009410/CsaV3_5G029980/CsaV3_4G025970/CsaV3_2G032030/CsaV3_4G024700/CsaV3_1G006160/CsaV3_5G039520/CsaV3_2G002500	13	CsaV3_6G040010/CsaV3_3G031460/CsaV3_1G033610/CsaV3_7G035250/CsaV3_2G030670/CsaV3_1G037370/CsaV3_2G025230/CsaV3_6G017140/CsaV3_1G037380/CsaV3_4G031180/CsaV3_1G043450/CsaV3_3G036850/CsaV3_3G012160
csv03022	Basal transcription factors	10/1838	35/4193	0.979134	0.99997	CsaV3_5G002620/CsaV3_1G041520/CsaV3_7G003000/CsaV3_1G006480/CsaV3_4G028940/CsaV3_2G033370/CsaV3_6G039860/novel.260/CsaV3_4G006050/CsaV3_3G028740	CsaV3_5G002620/CsaV3_1G041520/CsaV3_7G003000/CsaV3_1G006480/CsaV3_4G028940/CsaV3_2G033370/CsaV3_6G039860/-/CsaV3_4G006050/CsaV3_3G028740	csv:101215293/csv:101216807/csv:101208326/csv:101210662/csv:101209725/csv:101219951/csv:101222808/csv:101207087/csv:101211845/csv:101207693	10	3	CsaV3_5G002620/CsaV3_7G003000/novel.260	7	CsaV3_1G041520/CsaV3_1G006480/CsaV3_4G028940/CsaV3_2G033370/CsaV3_6G039860/CsaV3_4G006050/CsaV3_3G028740
csv03018	RNA degradation	32/1838	94/4193	0.980283	0.99997	CsaV3_4G012090/CsaV3_6G038490/CsaV3_1G041580/CsaV3_1G015170/CsaV3_3G032260/CsaV3_5G006110/CsaV3_7G031350/CsaV3_7G031130/CsaV3_2G012300/CsaV3_2G032410/CsaV3_7G034770/CsaV3_6G048080/CsaV3_3G023460/CsaV3_6G040390/CsaV3_7G025500/CsaV3_6G009310/CsaV3_3G043330/CsaV3_6G014010/CsaV3_1G042970/CsaV3_4G033760/CsaV3_4G012080/CsaV3_3G004220/CsaV3_5G035010/CsaV3_1G000270/CsaV3_3G040620/CsaV3_3G038550/CsaV3_UNG…	CsaV3_4G012090/CsaV3_6G038490/CsaV3_1G041580/CsaV3_1G015170/CsaV3_3G032260/CsaV3_5G006110/CsaV3_7G031350/CsaV3_7G031130/CsaV3_2G012300/CsaV3_2G032410/CsaV3_7G034770/CsaV3_6G048080/CsaV3_3G023460/CsaV3_6G040390/CsaV3_7G025500/CsaV3_6G009310/CsaV3_3G043330/CsaV3_6G014010/CsaV3_1G042970/CsaV3_4G033760/CsaV3_4G012080/CsaV3_3G004220/CsaV3_5G035010/CsaV3_1G000270/CsaV3_3G040620/CsaV3_3G038550/CsaV3_UNG…	csv:101222028/csv:101219801/csv:101217516/csv:101210423/csv:101206321/csv:101205035/csv:101222300/csv:101205556/csv:101210207/csv:101212217/csv:101219248/csv:101211230/csv:101220704/csv:101208322/csv:101205572/csv:101203071/csv:101206210/csv:101217447/csv:101215027/csv:101206043/csv:105434398/csv:101222826/csv:101206588/csv:101218707/csv:101205015/csv:101217887/csv:101210423/csv:101204960/csv:101…	32	21	CsaV3_4G012090/CsaV3_1G041580/CsaV3_3G032260/CsaV3_5G006110/CsaV3_7G031350/CsaV3_7G031130/CsaV3_2G012300/CsaV3_7G034770/CsaV3_6G040390/CsaV3_7G025500/CsaV3_6G009310/CsaV3_3G043330/CsaV3_6G014010/CsaV3_1G042970/CsaV3_4G012080/CsaV3_3G004220/CsaV3_5G035010/CsaV3_3G040620/CsaV3_3G038550/CsaV3_1G035920/CsaV3_7G003430	11	CsaV3_6G038490/CsaV3_1G015170/CsaV3_2G032410/CsaV3_6G048080/CsaV3_3G023460/CsaV3_4G033760/CsaV3_1G000270/CsaV3_UNG232220/CsaV3_6G016720/CsaV3_4G012120/CsaV3_6G048090
csv00514	Other types of O-glycan biosynthesis	2/1838	837808	0.983292	0.99997	CsaV3_6G038980/CsaV3_6G040850	CsaV3_6G038980/CsaV3_6G040850	csv:101207236/csv:101215452	2	0		2	CsaV3_6G038980/CsaV3_6G040850
csv00905	Brassinosteroid biosynthesis	3/1838	15/4193	0.986743	0.99997	CsaV3_3G030690/CsaV3_5G033450/CsaV3_5G033440	CsaV3_3G030690/CsaV3_5G033450/CsaV3_5G033440	csv:101203328/csv:101219383/csv:101219383	3	0		3	CsaV3_3G030690/CsaV3_5G033450/CsaV3_5G033440
csv00760	Nicotinate and nicotinamide metabolism	4/1838	19/4193	0.990045	0.99997	CsaV3_1G042920/CsaV3_2G001510/CsaV3_4G008190/CsaV3_6G040600	CsaV3_1G042920/CsaV3_2G001510/CsaV3_4G008190/CsaV3_6G040600	csv:101214308/csv:101204456/csv:101209512/csv:101211263	4	3	CsaV3_2G001510/CsaV3_4G008190/CsaV3_6G040600	1	CsaV3_1G042920
csv04145	Phagosome	19/1838	63/4193	0.99112	0.99997	CsaV3_1G037170/CsaV3_2G034580/CsaV3_5G013590/CsaV3_7G007680/CsaV3_3G030880/CsaV3_2G006990/CsaV3_6G001590/CsaV3_7G023490/CsaV3_1G040420/CsaV3_1G009720/CsaV3_7G033950/CsaV3_3G043190/CsaV3_2G024270/CsaV3_7G021690/CsaV3_7G034220/CsaV3_3G046610/CsaV3_2G029210/CsaV3_2G029570/CsaV3_3G026760	CsaV3_1G037170/CsaV3_2G034580/CsaV3_5G013590/CsaV3_7G007680/CsaV3_3G030880/CsaV3_2G006990/CsaV3_6G001590/CsaV3_7G023490/CsaV3_1G040420/CsaV3_1G009720/CsaV3_7G033950/CsaV3_3G043190/CsaV3_2G024270/CsaV3_7G021690/CsaV3_7G034220/CsaV3_3G046610/CsaV3_2G029210/CsaV3_2G029570/CsaV3_3G026760	csv:101209837/csv:101220160/csv:101209281/csv:101213258/csv:101208227/csv:101205515/csv:101207161/csv:101218255/csv:101208426/csv:101220011/csv:101211666/csv:101204049/csv:101216083/csv:101202759/csv:101208227/csv:101205012/csv:101209817/csv:101204817/csv:101217221	19	6	CsaV3_2G034580/CsaV3_2G006990/CsaV3_6G001590/CsaV3_1G009720/CsaV3_7G034220/CsaV3_2G029210	13	CsaV3_1G037170/CsaV3_5G013590/CsaV3_7G007680/CsaV3_3G030880/CsaV3_7G023490/CsaV3_1G040420/CsaV3_7G033950/CsaV3_3G043190/CsaV3_2G024270/CsaV3_7G021690/CsaV3_3G046610/CsaV3_2G029570/CsaV3_3G026760
csv00380	Tryptophan metabolism	10/1838	38/4193	0.992002	0.99997	CsaV3_2G015800/CsaV3_7G000850/CsaV3_6G031490/CsaV3_7G028260/CsaV3_6G022400/CsaV3_6G000070/CsaV3_2G031080/CsaV3_5G033650/CsaV3_4G005260/CsaV3_3G028570	CsaV3_2G015800/CsaV3_7G000850/CsaV3_6G031490/CsaV3_7G028260/CsaV3_6G022400/CsaV3_6G000070/CsaV3_2G031080/CsaV3_5G033650/CsaV3_4G005260/CsaV3_3G028570	csv:101214819/csv:101205749/csv:101216662/csv:101222503/csv:101209306/csv:101207718/csv:101203913/csv:101208854/csv:101221321/csv:101203521	10	5	CsaV3_2G015800/CsaV3_7G000850/CsaV3_6G022400/CsaV3_6G000070/CsaV3_2G031080	5	CsaV3_6G031490/CsaV3_7G028260/CsaV3_5G033650/CsaV3_4G005260/CsaV3_3G028570
csv00940	Phenylpropanoid biosynthesis	46/1838	135/4193	0.992564	0.99997	CsaV3_3G044560/CsaV3_1G004550/CsaV3_6G043930/CsaV3_3G032840/CsaV3_1G012650/CsaV3_2G036090/CsaV3_4G002330/CsaV3_4G002320/CsaV3_1G036000/CsaV3_3G043060/CsaV3_4G023590/CsaV3_1G037110/CsaV3_5G030330/CsaV3_1G030610/CsaV3_7G008400/CsaV3_6G039690/CsaV3_4G002310/CsaV3_3G047080/CsaV3_4G002290/CsaV3_2G018010/CsaV3_3G032850/CsaV3_4G002300/CsaV3_3G032830/CsaV3_3G040580/CsaV3_6G047430/CsaV3_1G040750/CsaV3_5G0…	CsaV3_3G044560/CsaV3_1G004550/CsaV3_6G043930/CsaV3_3G032840/CsaV3_1G012650/CsaV3_2G036090/CsaV3_4G002330/CsaV3_4G002320/CsaV3_1G036000/CsaV3_3G043060/CsaV3_4G023590/CsaV3_1G037110/CsaV3_5G030330/CsaV3_1G030610/CsaV3_7G008400/CsaV3_6G039690/CsaV3_4G002310/CsaV3_3G047080/CsaV3_4G002290/CsaV3_2G018010/CsaV3_3G032850/CsaV3_4G002300/CsaV3_3G032830/CsaV3_3G040580/CsaV3_6G047430/CsaV3_1G040750/CsaV3_5G0…	csv:101215384/csv:101204835/csv:101206860/csv:101218838/csv:101216263/csv:101221344/csv:101203846/csv:101203846/csv:101214999/csv:101223112/csv:101212957/csv:101208856/csv:101212121/csv:101219029/csv:101218441/csv:101218617/csv:101203846/csv:101218982/csv:101203846/csv:101206562/csv:101218838/csv:101203846/csv:101218838/csv:101215343/csv:101217954/csv:101205510/csv:101215530/csv:101205775/csv:101…	46	13	CsaV3_1G004550/CsaV3_1G012650/CsaV3_2G036090/CsaV3_1G037110/CsaV3_3G047080/CsaV3_2G018010/CsaV3_6G047430/CsaV3_2G009060/CsaV3_4G023660/CsaV3_4G008590/CsaV3_3G026650/CsaV3_3G018340/CsaV3_6G002170	33	CsaV3_3G044560/CsaV3_6G043930/CsaV3_3G032840/CsaV3_4G002330/CsaV3_4G002320/CsaV3_1G036000/CsaV3_3G043060/CsaV3_4G023590/CsaV3_5G030330/CsaV3_1G030610/CsaV3_7G008400/CsaV3_6G039690/CsaV3_4G002310/CsaV3_4G002290/CsaV3_3G032850/CsaV3_4G002300/CsaV3_3G032830/CsaV3_3G040580/CsaV3_1G040750/CsaV3_5G005000/CsaV3_6G039680/CsaV3_4G033920/CsaV3_4G023640/CsaV3_7G031610/CsaV3_6G039700/CsaV3_7G005720/CsaV3_4G0…
csv00310	Lysine degradation	6/1838	27/4193	0.994698	0.99997	CsaV3_5G023260/CsaV3_2G016440/CsaV3_6G022400/CsaV3_6G000070/CsaV3_4G005260/CsaV3_6G002600	CsaV3_5G023260/CsaV3_2G016440/CsaV3_6G022400/CsaV3_6G000070/CsaV3_4G005260/CsaV3_6G002600	csv:101220194/csv:101210052/csv:101209306/csv:101207718/csv:101221321/csv:101212299	6	4	CsaV3_5G023260/CsaV3_2G016440/CsaV3_6G022400/CsaV3_6G000070	2	CsaV3_4G005260/CsaV3_6G002600
csv00071	Fatty acid degradation	14/1838	52/4193	0.996273	0.99997	CsaV3_4G028240/CsaV3_7G024950/CsaV3_6G031750/CsaV3_5G002040/CsaV3_5G026420/CsaV3_7G024960/CsaV3_6G022310/CsaV3_7G024990/CsaV3_3G028760/CsaV3_6G007280/CsaV3_2G011380/CsaV3_6G001070/CsaV3_6G024070/CsaV3_4G005260	CsaV3_4G028240/CsaV3_7G024950/CsaV3_6G031750/CsaV3_5G002040/CsaV3_5G026420/CsaV3_7G024960/CsaV3_6G022310/CsaV3_7G024990/CsaV3_3G028760/CsaV3_6G007280/CsaV3_2G011380/CsaV3_6G001070/CsaV3_6G024070/CsaV3_4G005260	csv:101218462/csv:101209854/csv:101212881/csv:101209130/csv:101209864/csv:101206036/csv:101210295/csv:101206036/csv:101208182/csv:101208145/csv:101212301/csv:101212704/csv:101218899/csv:101221321	14	7	CsaV3_4G028240/CsaV3_7G024950/CsaV3_7G024960/CsaV3_7G024990/CsaV3_3G028760/CsaV3_6G007280/CsaV3_6G024070	7	CsaV3_6G031750/CsaV3_5G002040/CsaV3_5G026420/CsaV3_6G022310/CsaV3_2G011380/CsaV3_6G001070/CsaV3_4G005260
csv00630	Glyoxylate and dicarboxylate metabolism	18/1838	66/4193	0.998275	0.99997	CsaV3_6G043980/CsaV3_4G028640/CsaV3_7G028870/CsaV3_1G043170/CsaV3_6G031490/CsaV3_2G012760/CsaV3_1G046250/CsaV3_6G022400/CsaV3_7G003590/CsaV3_6G000070/CsaV3_5G034360/CsaV3_5G023920/CsaV3_1G010620/CsaV3_5G031200/CsaV3_4G008360/CsaV3_6G048160/CsaV3_3G030850/CsaV3_1G002350	CsaV3_6G043980/CsaV3_4G028640/CsaV3_7G028870/CsaV3_1G043170/CsaV3_6G031490/CsaV3_2G012760/CsaV3_1G046250/CsaV3_6G022400/CsaV3_7G003590/CsaV3_6G000070/CsaV3_5G034360/CsaV3_5G023920/CsaV3_1G010620/CsaV3_5G031200/CsaV3_4G008360/CsaV3_6G048160/CsaV3_3G030850/CsaV3_1G002350	csv:101206142/csv:101215287/csv:101214377/csv:101217893/csv:101216662/csv:101204387/csv:101217522/csv:101209306/csv:101221392/csv:101207718/csv:101219300/csv:101215515/csv:101209820/csv:101213570/csv:101207078/csv:101210494/csv:101205206/csv:101213903	18	11	CsaV3_7G028870/CsaV3_2G012760/CsaV3_1G046250/CsaV3_6G022400/CsaV3_7G003590/CsaV3_6G000070/CsaV3_1G010620/CsaV3_4G008360/CsaV3_6G048160/CsaV3_3G030850/CsaV3_1G002350	7	CsaV3_6G043980/CsaV3_4G028640/CsaV3_1G043170/CsaV3_6G031490/CsaV3_5G034360/CsaV3_5G023920/CsaV3_5G031200
csv04144	Endocytosis	46/1838	147/4193	0.999428	0.99997	CsaV3_2G016000/CsaV3_6G043530/CsaV3_4G003710/CsaV3_6G037410/CsaV3_6G003390/CsaV3_1G040130/CsaV3_6G052700/CsaV3_1G045850/CsaV3_UNG052420/CsaV3_5G027290/CsaV3_1G040030/CsaV3_2G025780/CsaV3_5G003600/CsaV3_1G007110/CsaV3_7G005760/CsaV3_6G013060/CsaV3_6G049840/CsaV3_3G042540/CsaV3_2G006790/CsaV3_3G042530/CsaV3_3G008320/CsaV3_5G024510/CsaV3_3G004820/CsaV3_2G003270/CsaV3_5G039590/CsaV3_7G023490/CsaV3_2G…	CsaV3_2G016000/CsaV3_6G043530/CsaV3_4G003710/CsaV3_6G037410/CsaV3_6G003390/CsaV3_1G040130/CsaV3_6G052700/CsaV3_1G045850/CsaV3_UNG052420/CsaV3_5G027290/CsaV3_1G040030/CsaV3_2G025780/CsaV3_5G003600/CsaV3_1G007110/CsaV3_7G005760/CsaV3_6G013060/CsaV3_6G049840/CsaV3_3G042540/CsaV3_2G006790/CsaV3_3G042530/CsaV3_3G008320/CsaV3_5G024510/CsaV3_3G004820/CsaV3_2G003270/CsaV3_5G039590/CsaV3_7G023490/CsaV3_2G…	csv:101218079/csv:101212793/csv:101208671/csv:101215596/csv:101211044/csv:101217093/csv:101208440/csv:101214261/csv:101217093/csv:105435011/csv:101203943/csv:101214728/csv:101209471/csv:101214261/csv:101209668/csv:101206370/csv:101210407/csv:105435011/csv:101220522/csv:105435011/csv:101212524/csv:101210353/csv:101219512/csv:101204449/csv:101220753/csv:101218255/csv:101210094/csv:101204911/csv:101…	46	14	CsaV3_1G045850/CsaV3_5G003600/CsaV3_1G007110/CsaV3_3G042540/CsaV3_3G042530/CsaV3_3G008320/CsaV3_5G024510/CsaV3_2G011210/CsaV3_3G005220/CsaV3_2G024470/CsaV3_6G035780/CsaV3_7G033070/CsaV3_7G034540/CsaV3_3G001280	32	CsaV3_2G016000/CsaV3_6G043530/CsaV3_4G003710/CsaV3_6G037410/CsaV3_6G003390/CsaV3_1G040130/CsaV3_6G052700/CsaV3_UNG052420/CsaV3_5G027290/CsaV3_1G040030/CsaV3_2G025780/CsaV3_7G005760/CsaV3_6G013060/CsaV3_6G049840/CsaV3_2G006790/CsaV3_3G004820/CsaV3_2G003270/CsaV3_5G039590/CsaV3_7G023490/CsaV3_3G011790/CsaV3_3G044060/CsaV3_3G035010/CsaV3_5G026520/CsaV3_6G052350/CsaV3_3G036470/CsaV3_5G015210/CsaV3_4G…
csv00563	Glycosylphosphatidylinositol (GPI)-anchor biosynthesis	1/1838	18/4193	0.99997	0.99997	CsaV3_3G032650	CsaV3_3G032650	csv:101215904	1	1	CsaV3_3G032650	0

## Sheet: XS_20vsXN_20DAP KEGG
KEGGID	Description	GeneRatio	BgRatio	pvalue	padj	geneID	geneName	keggID	Count	Up	Up_Gene_names	Down	Down_Gene_names
csv00940	Phenylpropanoid biosynthesis	36/513	132/4153	1.9442e-06	0.000209973	CsaV3_1G031500/CsaV3_3G004020/CsaV3_4G004610/CsaV3_1G007040/CsaV3_UNG223560/CsaV3_6G014060/CsaV3_3G004010/CsaV3_3G032630/CsaV3_7G008590/CsaV3_7G031910/CsaV3_1G036000/CsaV3_3G043060/CsaV3_UNG186450/CsaV3_7G006200/CsaV3_2G018020/CsaV3_4G008590/CsaV3_3G004000/CsaV3_4G005430/CsaV3_2G010460/novel.1073/CsaV3_UNG160170/CsaV3_3G039990/CsaV3_6G039670/CsaV3_6G006890/CsaV3_3G015450/CsaV3_7G031830/CsaV3_3G01…	CsaV3_1G031500/CsaV3_3G004020/CsaV3_4G004610/CsaV3_1G007040/CsaV3_UNG223560/CsaV3_6G014060/CsaV3_3G004010/CsaV3_3G032630/CsaV3_7G008590/CsaV3_7G031910/CsaV3_1G036000/CsaV3_3G043060/CsaV3_UNG186450/CsaV3_7G006200/CsaV3_2G018020/CsaV3_4G008590/CsaV3_3G004000/CsaV3_4G005430/CsaV3_2G010460/-/CsaV3_UNG160170/CsaV3_3G039990/CsaV3_6G039670/CsaV3_6G006890/CsaV3_3G015450/CsaV3_7G031830/CsaV3_3G016670/CsaV…	csv:101218077/csv:101205290/csv:101211442/csv:101218046/csv:101211442/csv:101218156/csv:101214916/csv:101215427/csv:101205648/csv:101213412/csv:101214999/csv:101223112/csv:101208174/csv:101221831/csv:101205228/csv:101204109/csv:101214675/csv:101223204/csv:101220742/csv:101202984/csv:101211442/csv:101217257/csv:101218382/csv:101213667/csv:101203261/csv:101214857/csv:101210306/csv:101205775/csv:101…	36	24	CsaV3_1G031500/CsaV3_4G004610/CsaV3_UNG223560/CsaV3_6G014060/CsaV3_3G032630/CsaV3_7G008590/CsaV3_7G031910/CsaV3_UNG186450/CsaV3_7G006200/CsaV3_4G008590/CsaV3_4G005430/novel.1073/CsaV3_UNG160170/CsaV3_3G039990/CsaV3_6G039670/CsaV3_3G015450/CsaV3_7G031830/CsaV3_3G016670/CsaV3_2G009060/CsaV3_7G008380/CsaV3_3G026650/CsaV3_UNG126970/CsaV3_7G031620/CsaV3_6G036550	12	CsaV3_3G004020/CsaV3_1G007040/CsaV3_3G004010/CsaV3_1G036000/CsaV3_3G043060/CsaV3_2G018020/CsaV3_3G004000/CsaV3_2G010460/CsaV3_6G006890/CsaV3_5G035070/CsaV3_3G030410/CsaV3_4G002320
csv04075	Plant hormone signal transduction	45/513	216/4153	0.000201259	0.010868	CsaV3_1G030930/CsaV3_5G013000/CsaV3_6G007970/CsaV3_2G027990/CsaV3_3G040330/CsaV3_7G006290/CsaV3_4G030060/CsaV3_6G001340/CsaV3_5G036740/CsaV3_3G026280/CsaV3_5G028350/CsaV3_5G009010/CsaV3_3G049190/CsaV3_1G045520/CsaV3_5G023170/CsaV3_3G001710/CsaV3_1G007260/CsaV3_5G008910/CsaV3_6G043710/CsaV3_4G029770/CsaV3_6G015010/CsaV3_6G043720/CsaV3_1G041270/CsaV3_2G033550/CsaV3_2G026400/CsaV3_1G031470/CsaV3_7G0…	CsaV3_1G030930/CsaV3_5G013000/CsaV3_6G007970/CsaV3_2G027990/CsaV3_3G040330/CsaV3_7G006290/CsaV3_4G030060/CsaV3_6G001340/CsaV3_5G036740/CsaV3_3G026280/CsaV3_5G028350/CsaV3_5G009010/CsaV3_3G049190/CsaV3_1G045520/CsaV3_5G023170/CsaV3_3G001710/CsaV3_1G007260/CsaV3_5G008910/CsaV3_6G043710/CsaV3_4G029770/CsaV3_6G015010/CsaV3_6G043720/CsaV3_1G041270/CsaV3_2G033550/CsaV3_2G026400/CsaV3_1G031470/CsaV3_7G0…	csv:101210711/csv:101204531/csv:101219164/csv:105435299/csv:101220810/csv:101216389/csv:101209540/csv:101220425/csv:101207245/csv:101207038/csv:101204164/csv:101216829/csv:101218875/csv:101212477/csv:101215516/csv:101205372/csv:101222222/csv:101209478/csv:101214967/csv:101220999/csv:101203423/csv:101211093/csv:101212154/csv:101217648/csv:101219726/csv:101209219/csv:101205786/csv:101205993/csv:101…	45	24	CsaV3_1G030930/CsaV3_5G013000/CsaV3_6G007970/CsaV3_2G027990/CsaV3_3G040330/CsaV3_6G001340/CsaV3_5G036740/CsaV3_3G026280/CsaV3_5G028350/CsaV3_1G045520/CsaV3_5G023170/CsaV3_5G008910/CsaV3_4G029770/CsaV3_6G043720/CsaV3_1G031470/CsaV3_7G029600/CsaV3_2G009260/CsaV3_2G032150/CsaV3_2G002930/CsaV3_4G036720/CsaV3_3G033450/CsaV3_3G045730/CsaV3_5G001910/CsaV3_1G026650	21	CsaV3_7G006290/CsaV3_4G030060/CsaV3_5G009010/CsaV3_3G049190/CsaV3_3G001710/CsaV3_1G007260/CsaV3_6G043710/CsaV3_6G015010/CsaV3_1G041270/CsaV3_2G033550/CsaV3_2G026400/CsaV3_4G032110/CsaV3_3G030830/CsaV3_4G030140/novel.1028/CsaV3_1G031430/CsaV3_4G030100/CsaV3_7G022810/CsaV3_4G016020/CsaV3_3G020850/CsaV3_3G040450
csv04626	Plant-pathogen interaction	31/513	140/4153	0.000684847	0.0246545	CsaV3_7G006290/CsaV3_3G021210/novel.399/CsaV3_2G034220/CsaV3_3G008610/CsaV3_3G010840/CsaV3_3G017480/CsaV3_1G029500/CsaV3_3G004350/CsaV3_1G004290/CsaV3_6G050560/CsaV3_2G028690/CsaV3_3G047190/CsaV3_5G037010/CsaV3_1G003480/CsaV3_2G013830/CsaV3_4G027680/CsaV3_6G039330/CsaV3_5G036030/CsaV3_7G026140/CsaV3_5G028580/CsaV3_4G003420/CsaV3_3G008110/CsaV3_1G014860/CsaV3_2G016890/CsaV3_5G033780/CsaV3_4G003590…	CsaV3_7G006290/CsaV3_3G021210/-/CsaV3_2G034220/CsaV3_3G008610/CsaV3_3G010840/CsaV3_3G017480/CsaV3_1G029500/CsaV3_3G004350/CsaV3_1G004290/CsaV3_6G050560/CsaV3_2G028690/CsaV3_3G047190/CsaV3_5G037010/CsaV3_1G003480/CsaV3_2G013830/CsaV3_4G027680/CsaV3_6G039330/CsaV3_5G036030/CsaV3_7G026140/CsaV3_5G028580/CsaV3_4G003420/CsaV3_3G008110/CsaV3_1G014860/CsaV3_2G016890/CsaV3_5G033780/CsaV3_4G003590/CsaV3_3…	csv:101216389/csv:101218237/csv:101206736/csv:101209761/csv:101217082/csv:101211635/csv:101210914/csv:101218643/csv:101219117/csv:101220025/csv:101221901/csv:101217470/csv:101211072/csv:101214558/csv:101222462/csv:101218625/csv:101205905/csv:101212721/csv:101203809/csv:101221990/csv:101215631/csv:101210877/csv:101206492/csv:101206440/csv:101205694/csv:101207390/csv:101215403/csv:101212685/csv:101…	31	8	CsaV3_1G029500/CsaV3_3G004350/CsaV3_6G050560/CsaV3_3G047190/CsaV3_4G027680/CsaV3_6G039330/CsaV3_5G036030/CsaV3_1G038860	23	CsaV3_7G006290/CsaV3_3G021210/novel.399/CsaV3_2G034220/CsaV3_3G008610/CsaV3_3G010840/CsaV3_3G017480/CsaV3_1G004290/CsaV3_2G028690/CsaV3_5G037010/CsaV3_1G003480/CsaV3_2G013830/CsaV3_7G026140/CsaV3_5G028580/CsaV3_4G003420/CsaV3_3G008110/CsaV3_1G014860/CsaV3_2G016890/CsaV3_5G033780/CsaV3_4G003590/CsaV3_3G015240/CsaV3_3G027200/CsaV3_2G001810
csv00270	Cysteine and methionine metabolism	24/513	102/4153	0.0011189	0.0302104	CsaV3_6G000650/CsaV3_3G010720/CsaV3_7G018620/CsaV3_3G020550/CsaV3_6G039940/CsaV3_1G008370/CsaV3_2G013530/CsaV3_4G006090/CsaV3_3G028000/CsaV3_3G041150/CsaV3_4G033420/CsaV3_5G004150/CsaV3_3G000880/CsaV3_3G031190/CsaV3_3G040500/CsaV3_3G033240/CsaV3_3G013880/CsaV3_2G004390/CsaV3_1G039690/CsaV3_5G001660/CsaV3_6G015400/CsaV3_1G005050/CsaV3_6G037780/CsaV3_1G001620	CsaV3_6G000650/CsaV3_3G010720/CsaV3_7G018620/CsaV3_3G020550/CsaV3_6G039940/CsaV3_1G008370/CsaV3_2G013530/CsaV3_4G006090/CsaV3_3G028000/CsaV3_3G041150/CsaV3_4G033420/CsaV3_5G004150/CsaV3_3G000880/CsaV3_3G031190/CsaV3_3G040500/CsaV3_3G033240/CsaV3_3G013880/CsaV3_2G004390/CsaV3_1G039690/CsaV3_5G001660/CsaV3_6G015400/CsaV3_1G005050/CsaV3_6G037780/CsaV3_1G001620	csv:101220896/csv:101209658/csv:101213467/csv:101207514/csv:101222328/csv:101221659/csv:101222725/csv:101212728/csv:101212743/csv:101212851/csv:101212407/csv:101217863/csv:101214172/csv:101219910/csv:101203129/csv:101203709/csv:101213486/csv:101218606/csv:101218750/csv:101207013/csv:101221653/csv:101211651/csv:101209525/csv:101210007	24	16	CsaV3_6G000650/CsaV3_3G010720/CsaV3_7G018620/CsaV3_3G020550/CsaV3_6G039940/CsaV3_1G008370/CsaV3_2G013530/CsaV3_3G028000/CsaV3_3G041150/CsaV3_4G033420/CsaV3_5G004150/CsaV3_3G033240/CsaV3_3G013880/CsaV3_2G004390/CsaV3_5G001660/CsaV3_1G005050	8	CsaV3_4G006090/CsaV3_3G000880/CsaV3_3G031190/CsaV3_3G040500/CsaV3_1G039690/CsaV3_6G015400/CsaV3_6G037780/CsaV3_1G001620
csv00196	Photosynthesis - antenna proteins	8/513	20/4153	0.00166332	0.0359277	CsaV3_1G032510/CsaV3_5G039350/CsaV3_2G027790/CsaV3_6G013800/CsaV3_1G005600/CsaV3_7G002620/CsaV3_5G030270/CsaV3_3G005950	CsaV3_1G032510/CsaV3_5G039350/CsaV3_2G027790/CsaV3_6G013800/CsaV3_1G005600/CsaV3_7G002620/CsaV3_5G030270/CsaV3_3G005950	csv:101211276/csv:101218137/csv:101219846/csv:101213845/csv:101218675/csv:101212963/csv:101214055/csv:101207278	8	7	CsaV3_1G032510/CsaV3_5G039350/CsaV3_6G013800/CsaV3_1G005600/CsaV3_7G002620/CsaV3_5G030270/CsaV3_3G005950	1	CsaV3_2G027790
csv00904	Diterpenoid biosynthesis	8/513	23/4153	0.0046231	0.0832159	CsaV3_4G007790/CsaV3_3G026530/CsaV3_5G005560/CsaV3_7G032870/CsaV3_3G049420/CsaV3_3G049410/CsaV3_1G032430/CsaV3_3G016600	CsaV3_4G007790/CsaV3_3G026530/CsaV3_5G005560/CsaV3_7G032870/CsaV3_3G049420/CsaV3_3G049410/CsaV3_1G032430/CsaV3_3G016600	csv:101215820/csv:101205466/csv:101212803/csv:101223012/csv:105435043/csv:101207275/csv:101214915/csv:101212262	8	7	CsaV3_4G007790/CsaV3_3G026530/CsaV3_5G005560/CsaV3_7G032870/CsaV3_3G049420/CsaV3_1G032430/CsaV3_3G016600	1	CsaV3_3G049410
csv00450	Selenocompound metabolism	6/513	17/4153	0.0128769	0.192566	CsaV3_3G012820/CsaV3_3G006730/CsaV3_3G041150/CsaV3_3G000880/CsaV3_3G040500/CsaV3_5G001660	CsaV3_3G012820/CsaV3_3G006730/CsaV3_3G041150/CsaV3_3G000880/CsaV3_3G040500/CsaV3_5G001660	csv:101221111/csv:101211867/csv:101212851/csv:101214172/csv:101203129/csv:101207013	6	4	CsaV3_3G012820/CsaV3_3G006730/CsaV3_3G041150/CsaV3_5G001660	2	CsaV3_3G000880/CsaV3_3G040500
csv00330	Arginine and proline metabolism	13/513	55/4153	0.0142642	0.192566	CsaV3_7G030830/CsaV3_3G014000/CsaV3_3G020550/CsaV3_3G034580/CsaV3_1G008370/CsaV3_3G028000/CsaV3_2G004110/CsaV3_6G005580/CsaV3_3G013880/CsaV3_1G004640/CsaV3_4G032140/CsaV3_2G001470/CsaV3_1G001620	CsaV3_7G030830/CsaV3_3G014000/CsaV3_3G020550/CsaV3_3G034580/CsaV3_1G008370/CsaV3_3G028000/CsaV3_2G004110/CsaV3_6G005580/CsaV3_3G013880/CsaV3_1G004640/CsaV3_4G032140/CsaV3_2G001470/CsaV3_1G001620	csv:101209263/csv:101215570/csv:101207514/csv:101222070/csv:101221659/csv:101212743/csv:101202756/csv:101218235/csv:101213486/csv:101206436/csv:101205765/csv:101205432/csv:101210007	13	9	CsaV3_7G030830/CsaV3_3G020550/CsaV3_3G034580/CsaV3_1G008370/CsaV3_3G028000/CsaV3_2G004110/CsaV3_3G013880/CsaV3_1G004640/CsaV3_2G001470	4	CsaV3_3G014000/CsaV3_6G005580/CsaV3_4G032140/CsaV3_1G001620
csv00460	Cyanoamino acid metabolism	10/513	39/4153	0.0172307	0.203559	CsaV3_6G000650/CsaV3_1G007040/CsaV3_1G036000/CsaV3_3G043060/CsaV3_UNG186450/CsaV3_2G010460/CsaV3_6G045790/CsaV3_5G035070/CsaV3_4G034720/novel.202	CsaV3_6G000650/CsaV3_1G007040/CsaV3_1G036000/CsaV3_3G043060/CsaV3_UNG186450/CsaV3_2G010460/CsaV3_6G045790/CsaV3_5G035070/CsaV3_4G034720/-	csv:101220896/csv:101218046/csv:101214999/csv:101223112/csv:101208174/csv:101220742/csv:101214973/csv:101209588/csv:101218064/csv:101210312	10	2	CsaV3_6G000650/CsaV3_UNG186450	8	CsaV3_1G007040/CsaV3_1G036000/CsaV3_3G043060/CsaV3_2G010460/CsaV3_6G045790/CsaV3_5G035070/CsaV3_4G034720/novel.202
csv00195	Photosynthesis	12/513	51/4153	0.0188481	0.203559	CsaV3_2G009680/CsaV3_3G013420/CsaV3_3G046150/CsaV3_2G010090/CsaV3_1G011330/CsaV3_1G046680/CsaV3_6G042680/CsaV3_4G007600/CsaV3_6G002740/CsaV3_1G015100/CsaV3_UNG209270/CsaV3_3G000770	CsaV3_2G009680/CsaV3_3G013420/CsaV3_3G046150/CsaV3_2G010090/CsaV3_1G011330/CsaV3_1G046680/CsaV3_6G042680/CsaV3_4G007600/CsaV3_6G002740/CsaV3_1G015100/CsaV3_UNG209270/CsaV3_3G000770	csv:101208674/csv:101207214/csv:101211484/csv:101203850/csv:101209135/csv:101215480/csv:101203080/csv:101215781/csv:101211740/csv:101209111/csv:3429265/csv:101216095	12	10	CsaV3_2G009680/CsaV3_3G013420/CsaV3_3G046150/CsaV3_2G010090/CsaV3_1G011330/CsaV3_1G046680/CsaV3_6G042680/CsaV3_4G007600/CsaV3_6G002740/CsaV3_1G015100	2	CsaV3_UNG209270/CsaV3_3G000770
csv00945	Stilbenoid, diarylheptanoid and gingerol biosynthesis	5/513	14/4153	0.021765	0.213693	CsaV3_7G003200/CsaV3_7G008590/CsaV3_3G039990/CsaV3_7G031830/CsaV3_2G009060	CsaV3_7G003200/CsaV3_7G008590/CsaV3_3G039990/CsaV3_7G031830/CsaV3_2G009060	csv:101216522/csv:101205648/csv:101217257/csv:101214857/csv:101205775	5	5	CsaV3_7G003200/CsaV3_7G008590/CsaV3_3G039990/CsaV3_7G031830/CsaV3_2G009060	0
csv00130	Ubiquinone and other terpenoid-quinone biosynthesis	10/513	42/4153	0.0284407	0.254253	CsaV3_1G031500/CsaV3_3G032630/CsaV3_2G008500/CsaV3_5G031500/CsaV3_2G009060/CsaV3_4G033420/CsaV3_7G031620/CsaV3_3G030410/CsaV3_2G014380/CsaV3_6G016300	CsaV3_1G031500/CsaV3_3G032630/CsaV3_2G008500/CsaV3_5G031500/CsaV3_2G009060/CsaV3_4G033420/CsaV3_7G031620/CsaV3_3G030410/CsaV3_2G014380/CsaV3_6G016300	csv:101218077/csv:101215427/csv:101221791/csv:101216706/csv:101205775/csv:101212407/csv:101218121/csv:101219578/csv:101211762/csv:101211672	10	7	CsaV3_1G031500/CsaV3_3G032630/CsaV3_5G031500/CsaV3_2G009060/CsaV3_4G033420/CsaV3_7G031620/CsaV3_6G016300	3	CsaV3_2G008500/CsaV3_3G030410/CsaV3_2G014380
csv00906	Carotenoid biosynthesis	8/513	31/4153	0.0306046	0.254253	CsaV3_4G007180/CsaV3_7G008610/CsaV3_4G007140/CsaV3_2G001370/CsaV3_4G007760/CsaV3_3G017450/CsaV3_4G003370/CsaV3_4G017450	CsaV3_4G007180/CsaV3_7G008610/CsaV3_4G007140/CsaV3_2G001370/CsaV3_4G007760/CsaV3_3G017450/CsaV3_4G003370/CsaV3_4G017450	csv:101220226/csv:101219389/csv:101212508/csv:101213753/csv:101219505/csv:101212140/csv:101211624/csv:101219033	8	3	CsaV3_7G008610/CsaV3_2G001370/CsaV3_4G007760	5	CsaV3_4G007180/CsaV3_4G007140/CsaV3_3G017450/CsaV3_4G003370/CsaV3_4G017450
csv00410	beta-Alanine metabolism	10/513	43/4153	0.0331226	0.255517	CsaV3_7G030830/CsaV3_7G022600/CsaV3_1G043650/CsaV3_5G003790/CsaV3_2G004110/CsaV3_3G033630/CsaV3_6G028580/CsaV3_4G032140/CsaV3_2G001470/CsaV3_1G005000	CsaV3_7G030830/CsaV3_7G022600/CsaV3_1G043650/CsaV3_5G003790/CsaV3_2G004110/CsaV3_3G033630/CsaV3_6G028580/CsaV3_4G032140/CsaV3_2G001470/CsaV3_1G005000	csv:101209263/csv:101210998/csv:101222552/csv:101213059/csv:101202756/csv:101209181/csv:101221248/csv:101205765/csv:101205432/csv:101210903	10	6	CsaV3_7G030830/CsaV3_2G004110/CsaV3_3G033630/CsaV3_6G028580/CsaV3_2G001470/CsaV3_1G005000	4	CsaV3_7G022600/CsaV3_1G043650/CsaV3_5G003790/CsaV3_4G032140
csv00920	Sulfur metabolism	7/513	30/4153	0.068159	0.490745	CsaV3_6G000650/CsaV3_7G018620/CsaV3_6G001060/CsaV3_3G012820/CsaV3_3G041150/CsaV3_2G004390/CsaV3_1G039690	CsaV3_6G000650/CsaV3_7G018620/CsaV3_6G001060/CsaV3_3G012820/CsaV3_3G041150/CsaV3_2G004390/CsaV3_1G039690	csv:101220896/csv:101213467/csv:101213660/csv:101221111/csv:101212851/csv:101218606/csv:101218750	7	6	CsaV3_6G000650/CsaV3_7G018620/CsaV3_6G001060/CsaV3_3G012820/CsaV3_3G041150/CsaV3_2G004390	1	CsaV3_1G039690
csv00360	Phenylalanine metabolism	9/513	44/4153	0.0850598	0.574154	CsaV3_6G014060/CsaV3_7G022600/CsaV3_6G039670/CsaV3_5G003790/CsaV3_1G031900/CsaV3_4G033420/CsaV3_6G028580/CsaV3_4G002320/CsaV3_6G036550	CsaV3_6G014060/CsaV3_7G022600/CsaV3_6G039670/CsaV3_5G003790/CsaV3_1G031900/CsaV3_4G033420/CsaV3_6G028580/CsaV3_4G002320/CsaV3_6G036550	csv:101218156/csv:101210998/csv:101218382/csv:101213059/csv:101203411/csv:101212407/csv:101221248/csv:101203846/csv:101206890	9	5	CsaV3_6G014060/CsaV3_6G039670/CsaV3_4G033420/CsaV3_6G028580/CsaV3_6G036550	4	CsaV3_7G022600/CsaV3_5G003790/CsaV3_1G031900/CsaV3_4G002320
csv00591	Linoleic acid metabolism	5/513	21/4153	0.107656	0.597041	CsaV3_7G034390/CsaV3_2G005360/CsaV3_2G006460/CsaV3_4G023810/CsaV3_2G006390	CsaV3_7G034390/CsaV3_2G005360/CsaV3_2G006460/CsaV3_4G023810/CsaV3_2G006390	csv:101204952/csv:101207901/csv:101206327/csv:101216566/csv:105434554	5	3	CsaV3_2G005360/CsaV3_2G006460/CsaV3_4G023810	2	CsaV3_7G034390/CsaV3_2G006390
csv00960	Tropane, piperidine and pyridine alkaloid biosynthesis	5/513	21/4153	0.107656	0.597041	CsaV3_3G034620/CsaV3_7G022600/CsaV3_5G003790/CsaV3_4G033420/CsaV3_3G034610	CsaV3_3G034620/CsaV3_7G022600/CsaV3_5G003790/CsaV3_4G033420/CsaV3_3G034610	csv:101205728/csv:101210998/csv:101213059/csv:101212407/csv:101206201	5	3	CsaV3_3G034620/CsaV3_4G033420/CsaV3_3G034610	2	CsaV3_7G022600/CsaV3_5G003790
csv02010	ABC transporters	5/513	21/4153	0.107656	0.597041	CsaV3_2G009630/CsaV3_6G051320/CsaV3_5G029720/CsaV3_6G052240/CsaV3_3G032770	CsaV3_2G009630/CsaV3_6G051320/CsaV3_5G029720/CsaV3_6G052240/CsaV3_3G032770	csv:101209574/csv:101210649/csv:101202823/csv:101209905/csv:101211576	5	4	CsaV3_2G009630/CsaV3_6G051320/CsaV3_5G029720/CsaV3_3G032770	1	CsaV3_6G052240
csv04016	MAPK signaling pathway - plant	20/513	122/4153	0.110563	0.597041	CsaV3_7G006290/CsaV3_4G030060/CsaV3_6G001340/CsaV3_4G035580/CsaV3_3G049190/CsaV3_3G001710/CsaV3_7G026460/CsaV3_3G008610/CsaV3_4G006090/CsaV3_7G029600/CsaV3_2G013830/CsaV3_2G001350/CsaV3_4G027680/CsaV3_2G009260/CsaV3_4G030140/CsaV3_4G030100/CsaV3_2G002930/CsaV3_3G033450/CsaV3_3G015240/CsaV3_1G038860	CsaV3_7G006290/CsaV3_4G030060/CsaV3_6G001340/CsaV3_4G035580/CsaV3_3G049190/CsaV3_3G001710/CsaV3_7G026460/CsaV3_3G008610/CsaV3_4G006090/CsaV3_7G029600/CsaV3_2G013830/CsaV3_2G001350/CsaV3_4G027680/CsaV3_2G009260/CsaV3_4G030140/CsaV3_4G030100/CsaV3_2G002930/CsaV3_3G033450/CsaV3_3G015240/CsaV3_1G038860	csv:101216389/csv:101209540/csv:101220425/csv:101207734/csv:101218875/csv:101205372/csv:101223223/csv:101217082/csv:101212728/csv:101205786/csv:101218625/csv:101206374/csv:101205905/csv:101213479/csv:101210773/csv:101210281/csv:101220113/csv:101206842/csv:101212685/csv:101206498	20	8	CsaV3_6G001340/CsaV3_4G035580/CsaV3_7G029600/CsaV3_4G027680/CsaV3_2G009260/CsaV3_2G002930/CsaV3_3G033450/CsaV3_1G038860	12	CsaV3_7G006290/CsaV3_4G030060/CsaV3_3G049190/CsaV3_3G001710/CsaV3_7G026460/CsaV3_3G008610/CsaV3_4G006090/CsaV3_2G013830/CsaV3_2G001350/CsaV3_4G030140/CsaV3_4G030100/CsaV3_3G015240
csv00250	Alanine, aspartate and glutamate metabolism	10/513	54/4153	0.12194	0.614029	CsaV3_7G033940/CsaV3_6G016090/CsaV3_4G032320/CsaV3_4G004380/CsaV3_6G039090/CsaV3_4G035950/CsaV3_4G034720/CsaV3_3G033240/CsaV3_1G005000/CsaV3_7G021350	CsaV3_7G033940/CsaV3_6G016090/CsaV3_4G032320/CsaV3_4G004380/CsaV3_6G039090/CsaV3_4G035950/CsaV3_4G034720/CsaV3_3G033240/CsaV3_1G005000/CsaV3_7G021350	csv:101212146/csv:101214250/csv:101219660/csv:101202786/csv:101207975/csv:101213917/csv:101218064/csv:101203709/csv:101210903/csv:101218056	10	6	CsaV3_7G033940/CsaV3_4G004380/CsaV3_6G039090/CsaV3_3G033240/CsaV3_1G005000/CsaV3_7G021350	4	CsaV3_6G016090/CsaV3_4G032320/CsaV3_4G035950/CsaV3_4G034720
csv00400	Phenylalanine, tyrosine and tryptophan biosynthesis	8/513	41/4153	0.12508	0.614029	CsaV3_6G042420/CsaV3_4G031290/CsaV3_2G017780/CsaV3_1G008610/CsaV3_4G033420/CsaV3_2G003300/CsaV3_2G029790/CsaV3_1G010970	CsaV3_6G042420/CsaV3_4G031290/CsaV3_2G017780/CsaV3_1G008610/CsaV3_4G033420/CsaV3_2G003300/CsaV3_2G029790/CsaV3_1G010970	csv:101204463/csv:101203740/csv:101213380/csv:101204330/csv:101212407/csv:101214147/csv:101220636/csv:101208895	8	3	CsaV3_4G033420/CsaV3_2G003300/CsaV3_2G029790	5	CsaV3_6G042420/CsaV3_4G031290/CsaV3_2G017780/CsaV3_1G008610/CsaV3_1G010970
csv00561	Glycerolipid metabolism	11/513	63/4153	0.147347	0.691891	CsaV3_6G014580/CsaV3_7G034580/CsaV3_3G033310/CsaV3_3G034100/CsaV3_4G025340/CsaV3_5G034650/CsaV3_2G004110/CsaV3_3G015560/CsaV3_3G034040/CsaV3_5G034660/CsaV3_4G024550	CsaV3_6G014580/CsaV3_7G034580/CsaV3_3G033310/CsaV3_3G034100/CsaV3_4G025340/CsaV3_5G034650/CsaV3_2G004110/CsaV3_3G015560/CsaV3_3G034040/CsaV3_5G034660/CsaV3_4G024550	csv:101215610/csv:101222563/csv:101204929/csv:101214624/csv:101209692/csv:101216053/csv:101202756/csv:101205287/csv:101214865/csv:101215334/csv:101210022	11	7	CsaV3_6G014580/CsaV3_7G034580/CsaV3_3G033310/CsaV3_3G034100/CsaV3_4G025340/CsaV3_2G004110/CsaV3_3G034040	4	CsaV3_5G034650/CsaV3_3G015560/CsaV3_5G034660/CsaV3_4G024550
csv00790	Folate biosynthesis	5/513	24/4153	0.166319	0.748433	CsaV3_5G030140/CsaV3_3G021950/CsaV3_4G037860/CsaV3_4G033040/CsaV3_7G026240	CsaV3_5G030140/CsaV3_3G021950/CsaV3_4G037860/CsaV3_4G033040/CsaV3_7G026240	csv:101215260/csv:101208344/csv:101210375/csv:101206873/csv:101210466	5	1	CsaV3_5G030140	4	CsaV3_3G021950/CsaV3_4G037860/CsaV3_4G033040/CsaV3_7G026240
csv04712	Circadian rhythm - plant	6/513	31/4153	0.175983	0.760245	CsaV3_1G044210/CsaV3_5G006010/CsaV3_3G015190/CsaV3_6G044000/CsaV3_5G020710/CsaV3_7G002530	CsaV3_1G044210/CsaV3_5G006010/CsaV3_3G015190/CsaV3_6G044000/CsaV3_5G020710/CsaV3_7G002530	csv:101207969/csv:101206050/csv:101212197/csv:101205903/csv:101214586/csv:101211915	6	2	CsaV3_3G015190/CsaV3_6G044000	4	CsaV3_1G044210/CsaV3_5G006010/CsaV3_5G020710/CsaV3_7G002530
csv00941	Flavonoid biosynthesis	4/513	19/4153	0.200362	0.810827	CsaV3_7G008590/CsaV3_3G039990/CsaV3_7G031830/CsaV3_2G009060	CsaV3_7G008590/CsaV3_3G039990/CsaV3_7G031830/CsaV3_2G009060	csv:101205648/csv:101217257/csv:101214857/csv:101205775	4	4	CsaV3_7G008590/CsaV3_3G039990/CsaV3_7G031830/CsaV3_2G009060	0
csv00750	Vitamin B6 metabolism	3/513	13/4153	0.210509	0.810827	CsaV3_7G034880/CsaV3_3G021680/CsaV3_2G001290	CsaV3_7G034880/CsaV3_3G021680/CsaV3_2G001290	csv:101217360/csv:101205462/csv:101208070	3	1	CsaV3_7G034880	2	CsaV3_3G021680/CsaV3_2G001290
csv00100	Steroid biosynthesis	5/513	26/4153	0.211053	0.810827	CsaV3_7G033590/CsaV3_2G025870/CsaV3_3G032020/CsaV3_3G046140/CsaV3_7G033720	CsaV3_7G033590/CsaV3_2G025870/CsaV3_3G032020/CsaV3_3G046140/CsaV3_7G033720	csv:101217431/csv:101213038/csv:101217389/csv:101220177/csv:101215997	5	2	CsaV3_2G025870/CsaV3_3G032020	3	CsaV3_7G033590/CsaV3_3G046140/CsaV3_7G033720
csv00280	Valine, leucine and isoleucine degradation	8/513	47/4153	0.217722	0.810827	CsaV3_1G043650/CsaV3_3G014880/CsaV3_2G004110/CsaV3_6G021710/CsaV3_3G033240/CsaV3_3G011240/CsaV3_6G028580/CsaV3_3G019040	CsaV3_1G043650/CsaV3_3G014880/CsaV3_2G004110/CsaV3_6G021710/CsaV3_3G033240/CsaV3_3G011240/CsaV3_6G028580/CsaV3_3G019040	csv:101222552/csv:101207559/csv:101202756/csv:101216988/csv:101203709/csv:101217710/csv:101221248/csv:101221094	8	3	CsaV3_2G004110/CsaV3_3G033240/CsaV3_6G028580	5	CsaV3_1G043650/CsaV3_3G014880/CsaV3_6G021710/CsaV3_3G011240/CsaV3_3G019040
csv00310	Lysine degradation	5/513	27/4153	0.234732	0.813358	CsaV3_3G038540/CsaV3_2G004110/CsaV3_7G005580/CsaV3_6G028580/CsaV3_3G047160	CsaV3_3G038540/CsaV3_2G004110/CsaV3_7G005580/CsaV3_6G028580/CsaV3_3G047160	csv:101217644/csv:101202756/csv:101217644/csv:101221248/csv:101211572	5	3	CsaV3_2G004110/CsaV3_6G028580/CsaV3_3G047160	2	CsaV3_3G038540/CsaV3_7G005580
csv00061	Fatty acid biosynthesis	6/513	34/4153	0.237025	0.813358	CsaV3_6G001070/CsaV3_7G026160/CsaV3_5G023610/CsaV3_1G030920/CsaV3_3G043300/CsaV3_1G012760	CsaV3_6G001070/CsaV3_7G026160/CsaV3_5G023610/CsaV3_1G030920/CsaV3_3G043300/CsaV3_1G012760	csv:101212704/csv:101221530/csv:101212380/csv:101210955/csv:101205498/csv:101215312	6	3	CsaV3_6G001070/CsaV3_5G023610/CsaV3_1G030920	3	CsaV3_7G026160/CsaV3_3G043300/CsaV3_1G012760
csv00260	Glycine, serine and threonine metabolism	11/513	70/4153	0.240995	0.813358	CsaV3_7G022600/CsaV3_1G022960/CsaV3_5G003790/CsaV3_6G039090/CsaV3_3G031190/CsaV3_UNG000020/CsaV3_3G033240/CsaV3_2G001290/CsaV3_3G047160/novel.209/CsaV3_1G010970	CsaV3_7G022600/CsaV3_1G022960/CsaV3_5G003790/CsaV3_6G039090/CsaV3_3G031190/CsaV3_UNG000020/CsaV3_3G033240/CsaV3_2G001290/CsaV3_3G047160/-/CsaV3_1G010970	csv:101210998/csv:101211372/csv:101213059/csv:101207975/csv:101219910/csv:101205504/csv:101203709/csv:101208070/csv:101211572/csv:101205504/csv:101208895	11	6	CsaV3_1G022960/CsaV3_6G039090/CsaV3_UNG000020/CsaV3_3G033240/CsaV3_3G047160/novel.209	5	CsaV3_7G022600/CsaV3_5G003790/CsaV3_3G031190/CsaV3_2G001290/CsaV3_1G010970
csv01040	Biosynthesis of unsaturated fatty acids	4/513	21/4153	0.256014	0.837864	CsaV3_3G011240/CsaV3_3G033630/CsaV3_3G008950/CsaV3_6G022170	CsaV3_3G011240/CsaV3_3G033630/CsaV3_3G008950/CsaV3_6G022170	csv:101217710/csv:101209181/csv:101222848/csv:101212013	4	1	CsaV3_3G033630	3	CsaV3_3G011240/CsaV3_3G008950/CsaV3_6G022170
csv01230	Biosynthesis of amino acids	28/513	202/4153	0.282464	0.85326	CsaV3_6G000650/CsaV3_6G042420/CsaV3_7G033940/CsaV3_5G034910/CsaV3_7G018620/CsaV3_1G022960/CsaV3_1G044260/CsaV3_3G034580/CsaV3_6G039940/CsaV3_6G016090/CsaV3_7G021470/CsaV3_4G031290/CsaV3_2G034200/CsaV3_2G017780/CsaV3_3G041150/CsaV3_1G008610/CsaV3_1G016970/CsaV3_3G031190/CsaV3_UNG000020/CsaV3_3G040500/CsaV3_2G003300/CsaV3_2G001290/CsaV3_2G004390/CsaV3_1G039690/novel.209/CsaV3_2G029790/CsaV3_4G02467…	CsaV3_6G000650/CsaV3_6G042420/CsaV3_7G033940/CsaV3_5G034910/CsaV3_7G018620/CsaV3_1G022960/CsaV3_1G044260/CsaV3_3G034580/CsaV3_6G039940/CsaV3_6G016090/CsaV3_7G021470/CsaV3_4G031290/CsaV3_2G034200/CsaV3_2G017780/CsaV3_3G041150/CsaV3_1G008610/CsaV3_1G016970/CsaV3_3G031190/CsaV3_UNG000020/CsaV3_3G040500/CsaV3_2G003300/CsaV3_2G001290/CsaV3_2G004390/CsaV3_1G039690/-/CsaV3_2G029790/CsaV3_4G024670/CsaV3_…	csv:101220896/csv:101204463/csv:101212146/csv:101211316/csv:101213467/csv:101211372/csv:101208212/csv:101222070/csv:101222328/csv:101214250/csv:101219476/csv:101203740/csv:101209273/csv:101213380/csv:101212851/csv:101204330/csv:101223065/csv:101219910/csv:101205504/csv:101203129/csv:101214147/csv:101208070/csv:101218606/csv:101218750/csv:101205504/csv:101220636/csv:101218612/csv:101208895	28	14	CsaV3_6G000650/CsaV3_7G033940/CsaV3_7G018620/CsaV3_1G022960/CsaV3_3G034580/CsaV3_6G039940/CsaV3_7G021470/CsaV3_3G041150/CsaV3_1G016970/CsaV3_UNG000020/CsaV3_2G003300/CsaV3_2G004390/novel.209/CsaV3_2G029790	14	CsaV3_6G042420/CsaV3_5G034910/CsaV3_1G044260/CsaV3_6G016090/CsaV3_4G031290/CsaV3_2G034200/CsaV3_2G017780/CsaV3_1G008610/CsaV3_3G031190/CsaV3_3G040500/CsaV3_2G001290/CsaV3_1G039690/CsaV3_4G024670/CsaV3_1G010970
csv00062	Fatty acid elongation	4/513	22/4153	0.284921	0.85326	CsaV3_2G028690/CsaV3_3G008950/CsaV3_1G012760/CsaV3_6G022170	CsaV3_2G028690/CsaV3_3G008950/CsaV3_1G012760/CsaV3_6G022170	csv:101217470/csv:101222848/csv:101215312/csv:101212013	4	0		4	CsaV3_2G028690/CsaV3_3G008950/CsaV3_1G012760/CsaV3_6G022170
csv00600	Sphingolipid metabolism	4/513	22/4153	0.284921	0.85326	CsaV3_2G026490/CsaV3_6G008140/CsaV3_5G039980/CsaV3_5G004820	CsaV3_2G026490/CsaV3_6G008140/CsaV3_5G039980/CsaV3_5G004820	csv:101204467/csv:101217975/csv:101204709/csv:101222000	4	1	CsaV3_5G004820	3	CsaV3_2G026490/CsaV3_6G008140/CsaV3_5G039980
csv01212	Fatty acid metabolism	10/513	66/4153	0.293969	0.85326	CsaV3_6G001070/CsaV3_3G014880/CsaV3_5G023610/CsaV3_3G011240/CsaV3_3G033630/CsaV3_1G030920/CsaV3_6G028580/CsaV3_3G043300/CsaV3_1G012760/CsaV3_6G022170	CsaV3_6G001070/CsaV3_3G014880/CsaV3_5G023610/CsaV3_3G011240/CsaV3_3G033630/CsaV3_1G030920/CsaV3_6G028580/CsaV3_3G043300/CsaV3_1G012760/CsaV3_6G022170	csv:101212704/csv:101207559/csv:101212380/csv:101217710/csv:101209181/csv:101210955/csv:101221248/csv:101205498/csv:101215312/csv:101212013	10	5	CsaV3_6G001070/CsaV3_5G023610/CsaV3_3G033630/CsaV3_1G030920/CsaV3_6G028580	5	CsaV3_3G014880/CsaV3_3G011240/CsaV3_3G043300/CsaV3_1G012760/CsaV3_6G022170
csv00650	Butanoate metabolism	4/513	23/4153	0.314269	0.85326	CsaV3_1G044260/CsaV3_4G032320/CsaV3_6G028580/CsaV3_1G005000	CsaV3_1G044260/CsaV3_4G032320/CsaV3_6G028580/CsaV3_1G005000	csv:101208212/csv:101219660/csv:101221248/csv:101210903	4	2	CsaV3_6G028580/CsaV3_1G005000	2	CsaV3_1G044260/CsaV3_4G032320
csv00511	Other glycan degradation	3/513	16/4153	0.316022	0.85326	CsaV3_3G018140/CsaV3_5G024900/CsaV3_5G039980	CsaV3_3G018140/CsaV3_5G024900/CsaV3_5G039980	csv:101204534/csv:101222242/csv:101204709	3	0		3	CsaV3_3G018140/CsaV3_5G024900/CsaV3_5G039980
csv00950	Isoquinoline alkaloid biosynthesis	3/513	16/4153	0.316022	0.85326	CsaV3_7G022600/CsaV3_5G003790/CsaV3_4G033420	CsaV3_7G022600/CsaV3_5G003790/CsaV3_4G033420	csv:101210998/csv:101213059/csv:101212407	3	1	CsaV3_4G033420	2	CsaV3_7G022600/CsaV3_5G003790
csv00910	Nitrogen metabolism	5/513	31/4153	0.335062	0.861587	CsaV3_3G037320/CsaV3_4G014780/CsaV3_4G004380/CsaV3_3G042440/CsaV3_3G040230	CsaV3_3G037320/CsaV3_4G014780/CsaV3_4G004380/CsaV3_3G042440/CsaV3_3G040230	csv:101209642/csv:101214659/csv:101202786/csv:101213998/csv:101214380	5	2	CsaV3_4G004380/CsaV3_3G040230	3	CsaV3_3G037320/CsaV3_4G014780/CsaV3_3G042440
csv03430	Mismatch repair	5/513	31/4153	0.335062	0.861587	CsaV3_3G017020/CsaV3_1G031640/CsaV3_6G046400/CsaV3_2G002320/CsaV3_4G033030	CsaV3_3G017020/CsaV3_1G031640/CsaV3_6G046400/CsaV3_2G002320/CsaV3_4G033030	csv:101214720/csv:101219981/csv:101218071/csv:101210755/csv:101202933	5	0		5	CsaV3_3G017020/CsaV3_1G031640/CsaV3_6G046400/CsaV3_2G002320/CsaV3_4G033030
csv00592	alpha-Linolenic acid metabolism	9/513	62/4153	0.355957	0.894032	CsaV3_7G034390/CsaV3_7G024990/CsaV3_5G023060/CsaV3_7G006680/CsaV3_4G023810/CsaV3_2G010330/CsaV3_3G011240/CsaV3_3G033630/CsaV3_3G000680	CsaV3_7G034390/CsaV3_7G024990/CsaV3_5G023060/CsaV3_7G006680/CsaV3_4G023810/CsaV3_2G010330/CsaV3_3G011240/CsaV3_3G033630/CsaV3_3G000680	csv:101204952/csv:101206036/csv:101222233/csv:101218180/csv:101216566/csv:101218290/csv:101217710/csv:101209181/csv:101211109	9	5	CsaV3_7G006680/CsaV3_4G023810/CsaV3_2G010330/CsaV3_3G033630/CsaV3_3G000680	4	CsaV3_7G034390/CsaV3_7G024990/CsaV3_5G023060/CsaV3_3G011240
csv04146	Peroxisome	10/513	72/4153	0.397171	0.965017	CsaV3_6G001070/CsaV3_2G004490/CsaV3_2G009880/CsaV3_6G051820/CsaV3_6G039090/CsaV3_3G011240/CsaV3_3G033630/CsaV3_3G047160/CsaV3_4G010390/CsaV3_3G039850	CsaV3_6G001070/CsaV3_2G004490/CsaV3_2G009880/CsaV3_6G051820/CsaV3_6G039090/CsaV3_3G011240/CsaV3_3G033630/CsaV3_3G047160/CsaV3_4G010390/CsaV3_3G039850	csv:101212704/csv:101216556/csv:101206004/csv:101215498/csv:101207975/csv:101217710/csv:101209181/csv:101211572/csv:101218890/csv:101215097	10	6	CsaV3_6G001070/CsaV3_6G051820/CsaV3_6G039090/CsaV3_3G033630/CsaV3_3G047160/CsaV3_4G010390	4	CsaV3_2G004490/CsaV3_2G009880/CsaV3_3G011240/CsaV3_3G039850
csv00514	Other types of O-glycan biosynthesis	2/513	823198	0.40209	0.965017	CsaV3_3G027570/CsaV3_7G023280	CsaV3_3G027570/CsaV3_7G023280	csv:101221472/csv:101214097	2	0		2	CsaV3_3G027570/CsaV3_7G023280
csv00071	Fatty acid degradation	7/513	50/4153	0.423736	0.994858	CsaV3_6G001070/CsaV3_7G024990/CsaV3_3G014880/CsaV3_2G004110/CsaV3_3G011240/CsaV3_3G033630/CsaV3_6G028580	CsaV3_6G001070/CsaV3_7G024990/CsaV3_3G014880/CsaV3_2G004110/CsaV3_3G011240/CsaV3_3G033630/CsaV3_6G028580	csv:101212704/csv:101206036/csv:101207559/csv:101202756/csv:101217710/csv:101209181/csv:101221248	7	4	CsaV3_6G001070/CsaV3_2G004110/CsaV3_3G033630/CsaV3_6G028580	3	CsaV3_7G024990/CsaV3_3G014880/CsaV3_3G011240
csv00860	Porphyrin and chlorophyll metabolism	6/513	44/4153	0.465104	0.999999	CsaV3_7G031380/CsaV3_5G010770/CsaV3_2G030530/CsaV3_2G013440/CsaV3_7G007370/CsaV3_1G043160	CsaV3_7G031380/CsaV3_5G010770/CsaV3_2G030530/CsaV3_2G013440/CsaV3_7G007370/CsaV3_1G043160	csv:101222061/csv:101212245/csv:101220615/csv:101203653/csv:101208135/csv:101217650	6	5	CsaV3_7G031380/CsaV3_5G010770/CsaV3_2G030530/CsaV3_2G013440/CsaV3_1G043160	1	CsaV3_7G007370
csv00051	Fructose and mannose metabolism	7/513	52/4153	0.466031	0.999999	CsaV3_3G016700/CsaV3_6G006740/CsaV3_7G021470/CsaV3_5G004970/CsaV3_3G016710/CsaV3_6G016080/CsaV3_3G020950	CsaV3_3G016700/CsaV3_6G006740/CsaV3_7G021470/CsaV3_5G004970/CsaV3_3G016710/CsaV3_6G016080/CsaV3_3G020950	csv:101221918/csv:101213366/csv:101219476/csv:101220595/csv:101221690/csv:101214487/csv:101223130	7	2	CsaV3_7G021470/CsaV3_6G016080	5	CsaV3_3G016700/CsaV3_6G006740/CsaV3_5G004970/CsaV3_3G016710/CsaV3_3G020950
csv00350	Tyrosine metabolism	5/513	37/4153	0.488666	0.999999	CsaV3_7G022600/CsaV3_7G024990/CsaV3_5G003790/CsaV3_1G031900/CsaV3_4G033420	CsaV3_7G022600/CsaV3_7G024990/CsaV3_5G003790/CsaV3_1G031900/CsaV3_4G033420	csv:101210998/csv:101206036/csv:101213059/csv:101203411/csv:101212407	5	1	CsaV3_4G033420	4	CsaV3_7G022600/CsaV3_7G024990/CsaV3_5G003790/CsaV3_1G031900
csv04141	Protein processing in endoplasmic reticulum	21/513	166/4153	0.489336	0.999999	CsaV3_4G025700/CsaV3_5G008780/CsaV3_5G008690/CsaV3_7G004390/CsaV3_5G000720/CsaV3_5G008760/CsaV3_7G008210/CsaV3_2G009170/CsaV3_3G034390/CsaV3_3G041070/CsaV3_1G035810/CsaV3_3G017480/CsaV3_3G002770/CsaV3_3G007400/CsaV3_3G034210/CsaV3_7G029830/CsaV3_5G030370/CsaV3_1G012230/CsaV3_2G015720/novel.915/CsaV3_5G026520	CsaV3_4G025700/CsaV3_5G008780/CsaV3_5G008690/CsaV3_7G004390/CsaV3_5G000720/CsaV3_5G008760/CsaV3_7G008210/CsaV3_2G009170/CsaV3_3G034390/CsaV3_3G041070/CsaV3_1G035810/CsaV3_3G017480/CsaV3_3G002770/CsaV3_3G007400/CsaV3_3G034210/CsaV3_7G029830/CsaV3_5G030370/CsaV3_1G012230/CsaV3_2G015720/-/CsaV3_5G026520	csv:101214749/csv:101211702/csv:101217071/csv:101206023/csv:101220694/csv:101211939/csv:101220889/csv:101215564/csv:101219630/csv:101211398/csv:101204666/csv:101210914/csv:101219106/csv:101220008/csv:101217492/csv:101222860/csv:101210818/csv:101208731/csv:101214090/csv:101209382/csv:101211905	21	3	CsaV3_7G004390/CsaV3_3G041070/novel.915	18	CsaV3_4G025700/CsaV3_5G008780/CsaV3_5G008690/CsaV3_5G000720/CsaV3_5G008760/CsaV3_7G008210/CsaV3_2G009170/CsaV3_3G034390/CsaV3_1G035810/CsaV3_3G017480/CsaV3_3G002770/CsaV3_3G007400/CsaV3_3G034210/CsaV3_7G029830/CsaV3_5G030370/CsaV3_1G012230/CsaV3_2G015720/CsaV3_5G026520
csv00500	Starch and sucrose metabolism	15/513	119/4153	0.509032	0.999999	CsaV3_1G007040/CsaV3_4G000970/CsaV3_1G036000/CsaV3_3G043060/CsaV3_6G006740/CsaV3_6G045560/CsaV3_UNG186450/CsaV3_2G009410/CsaV3_2G010460/CsaV3_3G016150/CsaV3_7G003840/CsaV3_5G035070/CsaV3_5G005910/CsaV3_5G033210/CsaV3_1G022900	CsaV3_1G007040/CsaV3_4G000970/CsaV3_1G036000/CsaV3_3G043060/CsaV3_6G006740/CsaV3_6G045560/CsaV3_UNG186450/CsaV3_2G009410/CsaV3_2G010460/CsaV3_3G016150/CsaV3_7G003840/CsaV3_5G035070/CsaV3_5G005910/CsaV3_5G033210/CsaV3_1G022900	csv:101218046/csv:101203847/csv:101214999/csv:101223112/csv:101213366/csv:101211097/csv:101208174/csv:101212273/csv:101220742/csv:101212172/csv:101222005/csv:101209588/csv:101207009/csv:101221746/csv:101223071	15	6	CsaV3_4G000970/CsaV3_6G045560/CsaV3_UNG186450/CsaV3_2G009410/CsaV3_5G005910/CsaV3_1G022900	9	CsaV3_1G007040/CsaV3_1G036000/CsaV3_3G043060/CsaV3_6G006740/CsaV3_2G010460/CsaV3_3G016150/CsaV3_7G003840/CsaV3_5G035070/CsaV3_5G033210
csv00640	Propanoate metabolism	5/513	38/4153	0.513275	0.999999	CsaV3_1G043650/CsaV3_5G023610/CsaV3_5G004150/CsaV3_3G033630/CsaV3_6G028580	CsaV3_1G043650/CsaV3_5G023610/CsaV3_5G004150/CsaV3_3G033630/CsaV3_6G028580	csv:101222552/csv:101212380/csv:101217863/csv:101209181/csv:101221248	5	4	CsaV3_5G023610/CsaV3_5G004150/CsaV3_3G033630/CsaV3_6G028580	1	CsaV3_1G043650
csv00590	Arachidonic acid metabolism	2/513	14/4153	0.530921	0.999999	CsaV3_5G030140/CsaV3_6G045790	CsaV3_5G030140/CsaV3_6G045790	csv:101215260/csv:101214973	2	1	CsaV3_5G030140	1	CsaV3_6G045790
csv00740	Riboflavin metabolism	2/513	14/4153	0.530921	0.999999	CsaV3_3G038770/CsaV3_6G000480	CsaV3_3G038770/CsaV3_6G000480	csv:101220971/csv:101202904	2	1	CsaV3_3G038770	1	CsaV3_6G000480
csv00905	Brassinosteroid biosynthesis	2/513	14/4153	0.530921	0.999999	CsaV3_1G029710/CsaV3_3G030690	CsaV3_1G029710/CsaV3_3G030690	csv:101213466/csv:101203328	2	1	CsaV3_1G029710	1	CsaV3_3G030690
csv00040	Pentose and glucuronate interconversions	10/513	80/4153	0.535634	0.999999	CsaV3_3G009870/CsaV3_3G016700/CsaV3_3G033310/CsaV3_4G025340/CsaV3_2G034200/CsaV3_3G016710/CsaV3_7G031000/CsaV3_5G031360/CsaV3_7G032560/CsaV3_7G026220	CsaV3_3G009870/CsaV3_3G016700/CsaV3_3G033310/CsaV3_4G025340/CsaV3_2G034200/CsaV3_3G016710/CsaV3_7G031000/CsaV3_5G031360/CsaV3_7G032560/CsaV3_7G026220	csv:101217552/csv:101221918/csv:101204929/csv:101209692/csv:101209273/csv:101221690/csv:101207566/csv:101212122/csv:101205645/csv:101220821	10	4	CsaV3_3G009870/CsaV3_3G033310/CsaV3_4G025340/CsaV3_7G031000	6	CsaV3_3G016700/CsaV3_2G034200/CsaV3_3G016710/CsaV3_5G031360/CsaV3_7G032560/CsaV3_7G026220
csv00240	Pyrimidine metabolism	6/513	48/4153	0.55372	0.999999	CsaV3_6G053210/CsaV3_6G006570/CsaV3_3G011970/CsaV3_5G033670/CsaV3_7G021350/CsaV3_1G040320	CsaV3_6G053210/CsaV3_6G006570/CsaV3_3G011970/CsaV3_5G033670/CsaV3_7G021350/CsaV3_1G040320	csv:101219296/csv:101223081/csv:101207880/csv:101208611/csv:101218056/csv:101209098	6	4	CsaV3_6G053210/CsaV3_5G033670/CsaV3_7G021350/CsaV3_1G040320	2	CsaV3_6G006570/CsaV3_3G011970
csv00073	Cutin, suberine and wax biosynthesis	3/513	23/4153	0.55389	0.999999	CsaV3_2G009920/CsaV3_1G030900/CsaV3_1G000360	CsaV3_2G009920/CsaV3_1G030900/CsaV3_1G000360	csv:101205541/csv:101212905/csv:101210256	3	0		3	CsaV3_2G009920/CsaV3_1G030900/CsaV3_1G000360
csv00565	Ether lipid metabolism	3/513	23/4153	0.55389	0.999999	CsaV3_1G043430/CsaV3_6G005980/CsaV3_4G001530	CsaV3_1G043430/CsaV3_6G005980/CsaV3_4G001530	csv:101218054/csv:101218942/csv:101215246	3	2	CsaV3_1G043430/CsaV3_6G005980	1	CsaV3_4G001530
csv00562	Inositol phosphate metabolism	8/513	66/4153	0.57984	0.999999	CsaV3_6G045630/CsaV3_2G012250/CsaV3_1G043430/CsaV3_2G012240/CsaV3_6G037410/CsaV3_2G030590/CsaV3_4G004810/CsaV3_2G014550	CsaV3_6G045630/CsaV3_2G012250/CsaV3_1G043430/CsaV3_2G012240/CsaV3_6G037410/CsaV3_2G030590/CsaV3_4G004810/CsaV3_2G014550	csv:101211833/csv:101221482/csv:101218054/csv:101216505/csv:101215596/csv:101206636/csv:101207441/csv:101214424	8	3	CsaV3_6G045630/CsaV3_1G043430/CsaV3_4G004810	5	CsaV3_2G012250/CsaV3_2G012240/CsaV3_6G037410/CsaV3_2G030590/CsaV3_2G014550
csv00909	Sesquiterpenoid and triterpenoid biosynthesis	2/513	17/4153	0.639535	0.999999	CsaV3_3G003670/CsaV3_2G025870	CsaV3_3G003670/CsaV3_2G025870	csv:101202882/csv:101213038	2	1	CsaV3_2G025870	1	CsaV3_3G003670
csv04145	Phagosome	7/513	63/4153	0.676244	0.999999	CsaV3_6G050550/CsaV3_2G029210/CsaV3_3G007400/CsaV3_3G030880/CsaV3_3G026760/CsaV3_1G037170/CsaV3_3G040000	CsaV3_6G050550/CsaV3_2G029210/CsaV3_3G007400/CsaV3_3G030880/CsaV3_3G026760/CsaV3_1G037170/CsaV3_3G040000	csv:101218591/csv:101209817/csv:101220008/csv:101208227/csv:101217221/csv:101209837/csv:101217015	7	2	CsaV3_6G050550/CsaV3_2G029210	5	CsaV3_3G007400/CsaV3_3G030880/CsaV3_3G026760/CsaV3_1G037170/CsaV3_3G040000
csv00760	Nicotinate and nicotinamide metabolism	2/513	19/4153	0.70031	0.999999	CsaV3_3G034830/CsaV3_6G034080	CsaV3_3G034830/CsaV3_6G034080	csv:101205253/csv:101204002	2	2	CsaV3_3G034830/CsaV3_6G034080	0
csv00030	Pentose phosphate pathway	5/513	47/4153	0.706526	0.999999	CsaV3_5G034910/CsaV3_7G021470/CsaV3_5G000220/CsaV3_2G034200/CsaV3_1G016970	CsaV3_5G034910/CsaV3_7G021470/CsaV3_5G000220/CsaV3_2G034200/CsaV3_1G016970	csv:101211316/csv:101219476/csv:101208410/csv:101209273/csv:101223065	5	2	CsaV3_7G021470/CsaV3_1G016970	3	CsaV3_5G034910/CsaV3_5G000220/CsaV3_2G034200
csv04070	Phosphatidylinositol signaling system	6/513	56/4153	0.706876	0.999999	CsaV3_2G013830/CsaV3_4G027680/CsaV3_6G037410/CsaV3_2G030590/CsaV3_3G015240/CsaV3_2G014550	CsaV3_2G013830/CsaV3_4G027680/CsaV3_6G037410/CsaV3_2G030590/CsaV3_3G015240/CsaV3_2G014550	csv:101218625/csv:101205905/csv:101215596/csv:101206636/csv:101212685/csv:101214424	6	1	CsaV3_4G027680	5	CsaV3_2G013830/CsaV3_6G037410/CsaV3_2G030590/CsaV3_3G015240/CsaV3_2G014550
csv00230	Purine metabolism	9/513	84/4153	0.726753	0.999999	CsaV3_3G000810/CsaV3_3G012820/CsaV3_3G013810/CsaV3_3G038770/CsaV3_2G003460/CsaV3_1G012190/CsaV3_1G010130/CsaV3_1G016970/CsaV3_UNG227950	CsaV3_3G000810/CsaV3_3G012820/CsaV3_3G013810/CsaV3_3G038770/CsaV3_2G003460/CsaV3_1G012190/CsaV3_1G010130/CsaV3_1G016970/CsaV3_UNG227950	csv:101215130/csv:101221111/csv:101212920/csv:101220971/csv:101203230/csv:101208006/csv:101218785/csv:101223065/csv:101220616	9	3	CsaV3_3G012820/CsaV3_3G038770/CsaV3_1G016970	6	CsaV3_3G000810/CsaV3_3G013810/CsaV3_2G003460/CsaV3_1G012190/CsaV3_1G010130/CsaV3_UNG227950
csv00300	Lysine biosynthesis	1/513	823167	0.732865	0.999999	CsaV3_4G024670	CsaV3_4G024670	csv:101218612	1	0		1	CsaV3_4G024670
csv00480	Glutathione metabolism	8/513	76/4153	0.738722	0.999999	CsaV3_5G006680/CsaV3_6G000030/CsaV3_1G008370/CsaV3_3G015450/CsaV3_6G045790/CsaV3_3G028000/novel.403/CsaV3_1G001620	CsaV3_5G006680/CsaV3_6G000030/CsaV3_1G008370/CsaV3_3G015450/CsaV3_6G045790/CsaV3_3G028000/-/CsaV3_1G001620	csv:101203666/csv:101208623/csv:101221659/csv:101203261/csv:101214973/csv:101212743/csv:101207634/csv:101210007	8	5	CsaV3_5G006680/CsaV3_6G000030/CsaV3_1G008370/CsaV3_3G015450/CsaV3_3G028000	3	CsaV3_6G045790/novel.403/CsaV3_1G001620
csv00900	Terpenoid backbone biosynthesis	5/513	49/4153	0.741279	0.999999	CsaV3_1G036440/CsaV3_7G002170/CsaV3_5G025100/CsaV3_7G023860/CsaV3_7G006800	CsaV3_1G036440/CsaV3_7G002170/CsaV3_5G025100/CsaV3_7G023860/CsaV3_7G006800	csv:101220953/csv:101219178/csv:101216243/csv:101217388/csv:101205649	5	2	CsaV3_1G036440/CsaV3_7G023860	3	CsaV3_7G002170/CsaV3_5G025100/CsaV3_7G006800
csv03020	RNA polymerase	4/513	41/4153	0.763777	0.999999	CsaV3_3G032080/CsaV3_2G024730/CsaV3_5G031450/CsaV3_4G005180	CsaV3_3G032080/CsaV3_2G024730/CsaV3_5G031450/CsaV3_4G005180	csv:101216683/csv:101206603/csv:101211391/csv:101212587	4	1	CsaV3_4G005180	3	CsaV3_3G032080/CsaV3_2G024730/CsaV3_5G031450
csv03440	Homologous recombination	7/513	69/4153	0.766069	0.999999	CsaV3_1G031640/CsaV3_UNG098730/CsaV3_4G033030/novel.1204/CsaV3_5G013190/CsaV3_5G010570/CsaV3_UNG169310	CsaV3_1G031640/CsaV3_UNG098730/CsaV3_4G033030/-/CsaV3_5G013190/CsaV3_5G010570/CsaV3_UNG169310	csv:101219981/csv:101210305/csv:101202933/csv:101210305/csv:101215241/csv:101215377/csv:101210305	7	1	CsaV3_5G010570	6	CsaV3_1G031640/CsaV3_UNG098730/CsaV3_4G033030/novel.1204/CsaV3_5G013190/CsaV3_UNG169310
csv00730	Thiamine metabolism	2/513	22/4153	0.775305	0.999999	CsaV3_7G029140/CsaV3_2G003460	CsaV3_7G029140/CsaV3_2G003460	csv:101210895/csv:101203230	2	1	CsaV3_7G029140	1	CsaV3_2G003460
csv00510	N-Glycan biosynthesis	4/513	42/4153	0.780372	0.999999	CsaV3_5G031040/CsaV3_5G030370/CsaV3_7G002510/CsaV3_7G000470	CsaV3_5G031040/CsaV3_5G030370/CsaV3_7G002510/CsaV3_7G000470	csv:101222690/csv:101210818/csv:101213679/csv:101215230	4	0		4	CsaV3_5G031040/CsaV3_5G030370/CsaV3_7G002510/CsaV3_7G000470
csv03410	Base excision repair	3/513	33/4153	0.793036	0.999999	CsaV3_5G033540/CsaV3_4G033030/CsaV3_6G015040	CsaV3_5G033540/CsaV3_4G033030/CsaV3_6G015040	csv:101218195/csv:101202933/csv:101203672	3	1	CsaV3_5G033540	2	CsaV3_4G033030/CsaV3_6G015040
csv04130	SNARE interactions in vesicular transport	3/513	33/4153	0.793036	0.999999	CsaV3_3G030880/CsaV3_1G027860/CsaV3_3G047800	CsaV3_3G030880/CsaV3_1G027860/CsaV3_3G047800	csv:101208227/csv:101208350/csv:101207709	3	0		3	CsaV3_3G030880/CsaV3_1G027860/CsaV3_3G047800
csv00780	Biotin metabolism	1/513	823228	0.794932	0.999999	CsaV3_3G043300	CsaV3_3G043300	csv:101205498	1	0		1	CsaV3_3G043300
csv04933	AGE-RAGE signaling pathway in diabetic complications	1/513	823228	0.794932	0.999999	CsaV3_6G050550	CsaV3_6G050550	csv:101218591	1	1	CsaV3_6G050550	0
csv00630	Glyoxylate and dicarboxylate metabolism	6/513	66/4153	0.842122	0.999999	CsaV3_3G042420/CsaV3_6G051820/CsaV3_6G039090/CsaV3_5G002930/CsaV3_2G035120/CsaV3_3G040230	CsaV3_3G042420/CsaV3_6G051820/CsaV3_6G039090/CsaV3_5G002930/CsaV3_2G035120/CsaV3_3G040230	csv:101213516/csv:101215498/csv:101207975/csv:101220920/csv:101214114/csv:101214380	6	6	CsaV3_3G042420/CsaV3_6G051820/CsaV3_6G039090/CsaV3_5G002930/CsaV3_2G035120/CsaV3_3G040230	0
csv00052	Galactose metabolism	4/513	47/4153	0.849859	0.999999	CsaV3_4G033560/CsaV3_1G008720/CsaV3_5G005910/CsaV3_1G015730	CsaV3_4G033560/CsaV3_1G008720/CsaV3_5G005910/CsaV3_1G015730	csv:101214893/csv:101204256/csv:101207009/csv:101215109	4	3	CsaV3_1G008720/CsaV3_5G005910/CsaV3_1G015730	1	CsaV3_4G033560
csv00710	Carbon fixation in photosynthetic organisms	7/513	77/4153	0.855615	0.999999	CsaV3_3G030440/CsaV3_7G033940/CsaV3_5G034910/CsaV3_UNG071590/novel.1061/CsaV3_7G021470/CsaV3_2G034200	CsaV3_3G030440/CsaV3_7G033940/CsaV3_5G034910/CsaV3_UNG071590/-/CsaV3_7G021470/CsaV3_2G034200	csv:101220055/csv:101212146/csv:101211316/csv:101204181/csv:101212275/csv:101219476/csv:101209273	7	3	CsaV3_3G030440/CsaV3_7G033940/CsaV3_7G021470	4	CsaV3_5G034910/CsaV3_UNG071590/novel.1061/CsaV3_2G034200
csv00010	Glycolysis / Gluconeogenesis	11/513	115/4153	0.858129	0.999999	CsaV3_2G012250/CsaV3_7G024990/CsaV3_4G026400/CsaV3_1G022960/CsaV3_3G033310/CsaV3_7G021470/CsaV3_4G025340/CsaV3_2G012240/CsaV3_6G050730/CsaV3_2G004110/CsaV3_5G004150	CsaV3_2G012250/CsaV3_7G024990/CsaV3_4G026400/CsaV3_1G022960/CsaV3_3G033310/CsaV3_7G021470/CsaV3_4G025340/CsaV3_2G012240/CsaV3_6G050730/CsaV3_2G004110/CsaV3_5G004150	csv:101221482/csv:101206036/csv:101217534/csv:101211372/csv:101204929/csv:101219476/csv:101209692/csv:101216505/csv:101217174/csv:101202756/csv:101217863	11	6	CsaV3_1G022960/CsaV3_3G033310/CsaV3_7G021470/CsaV3_4G025340/CsaV3_2G004110/CsaV3_5G004150	5	CsaV3_2G012250/CsaV3_7G024990/CsaV3_4G026400/CsaV3_2G012240/CsaV3_6G050730
csv00290	Valine, leucine and isoleucine biosynthesis	1/513	15/4153	0.862108	0.999999	CsaV3_1G044260	CsaV3_1G044260	csv:101208212	1	0		1	CsaV3_1G044260
csv03013	RNA transport	14/513	144/4153	0.867404	0.999999	CsaV3_5G012490/CsaV3_6G046130/CsaV3_1G040360/CsaV3_5G000410/CsaV3_3G043200/CsaV3_1G014700/CsaV3_1G023010/CsaV3_7G034250/CsaV3_1G024130/CsaV3_2G036420/CsaV3_1G037230/CsaV3_6G017140/CsaV3_3G019240/CsaV3_6G043210	CsaV3_5G012490/CsaV3_6G046130/CsaV3_1G040360/CsaV3_5G000410/CsaV3_3G043200/CsaV3_1G014700/CsaV3_1G023010/CsaV3_7G034250/CsaV3_1G024130/CsaV3_2G036420/CsaV3_1G037230/CsaV3_6G017140/CsaV3_3G019240/CsaV3_6G043210	csv:101220434/csv:101217835/csv:101209997/csv:101203580/csv:101204290/csv:101221461/csv:101210873/csv:101207984/csv:101210714/csv:101218722/csv:101209344/csv:101217986/csv:101203990/csv:101217035	14	6	CsaV3_5G012490/CsaV3_6G046130/CsaV3_1G014700/CsaV3_2G036420/CsaV3_1G037230/CsaV3_3G019240	8	CsaV3_1G040360/CsaV3_5G000410/CsaV3_3G043200/CsaV3_1G023010/CsaV3_7G034250/CsaV3_1G024130/CsaV3_6G017140/CsaV3_6G043210
csv00564	Glycerophospholipid metabolism	8/513	89/4153	0.875719	0.999999	CsaV3_1G043430/CsaV3_5G034650/CsaV3_6G005980/CsaV3_4G001530/CsaV3_3G034040/CsaV3_2G010330/CsaV3_5G034660/CsaV3_4G024550	CsaV3_1G043430/CsaV3_5G034650/CsaV3_6G005980/CsaV3_4G001530/CsaV3_3G034040/CsaV3_2G010330/CsaV3_5G034660/CsaV3_4G024550	csv:101218054/csv:101216053/csv:101218942/csv:101215246/csv:101214865/csv:101218290/csv:101215334/csv:101210022	8	4	CsaV3_1G043430/CsaV3_6G005980/CsaV3_3G034040/CsaV3_2G010330	4	CsaV3_5G034650/CsaV3_4G001530/CsaV3_5G034660/CsaV3_4G024550
csv04144	Endocytosis	14/513	147/4153	0.885787	0.999999	CsaV3_4G003850/CsaV3_2G009170/CsaV3_6G005980/CsaV3_2G002330/CsaV3_4G001530/CsaV3_6G022210/CsaV3_6G051030/CsaV3_6G037410/CsaV3_3G049290/CsaV3_7G030260/CsaV3_7G002160/CsaV3_2G016000/CsaV3_3G011990/CsaV3_5G026520	CsaV3_4G003850/CsaV3_2G009170/CsaV3_6G005980/CsaV3_2G002330/CsaV3_4G001530/CsaV3_6G022210/CsaV3_6G051030/CsaV3_6G037410/CsaV3_3G049290/CsaV3_7G030260/CsaV3_7G002160/CsaV3_2G016000/CsaV3_3G011990/CsaV3_5G026520	csv:101205627/csv:101215564/csv:101218942/csv:101210509/csv:101215246/csv:101211533/csv:101212843/csv:101215596/csv:101220779/csv:101217563/csv:101212521/csv:101218079/csv:101212041/csv:101211905	14	4	CsaV3_4G003850/CsaV3_6G005980/CsaV3_7G002160/CsaV3_3G011990	10	CsaV3_2G009170/CsaV3_2G002330/CsaV3_4G001530/CsaV3_6G022210/CsaV3_6G051030/CsaV3_6G037410/CsaV3_3G049290/CsaV3_7G030260/CsaV3_2G016000/CsaV3_5G026520
csv03030	DNA replication	3/513	40/4153	0.887784	0.999999	CsaV3_1G031640/CsaV3_6G046400/CsaV3_4G033030	CsaV3_1G031640/CsaV3_6G046400/CsaV3_4G033030	csv:101219981/csv:101218071/csv:101202933	3	0		3	CsaV3_1G031640/CsaV3_6G046400/CsaV3_4G033030
csv00340	Histidine metabolism	1/513	17/4153	0.894182	0.999999	CsaV3_2G004110	CsaV3_2G004110	csv:101202756	1	1	CsaV3_2G004110	0
csv00053	Ascorbate and aldarate metabolism	3/513	43/4153	0.914881	0.999999	CsaV3_5G006680/CsaV3_2G004110/CsaV3_7G007220	CsaV3_5G006680/CsaV3_2G004110/CsaV3_7G007220	csv:101203666/csv:101202756/csv:101206435	3	2	CsaV3_5G006680/CsaV3_2G004110	1	CsaV3_7G007220
csv03060	Protein export	3/513	43/4153	0.914881	0.999999	CsaV3_4G007940/CsaV3_3G007400/CsaV3_6G040720	CsaV3_4G007940/CsaV3_3G007400/CsaV3_6G040720	csv:101214382/csv:101220008/csv:101209537	3	1	CsaV3_6G040720	2	CsaV3_4G007940/CsaV3_3G007400
csv00513	Various types of N-glycan biosynthesis	2/513	32/4153	0.91974	0.999999	CsaV3_7G002510/CsaV3_7G008560	CsaV3_7G002510/CsaV3_7G008560	csv:101213679/csv:101205170	2	0		2	CsaV3_7G002510/CsaV3_7G008560
csv00620	Pyruvate metabolism	7/513	86/4153	0.920884	0.999999	CsaV3_UNG071590/CsaV3_6G039890/novel.1061/CsaV3_2G004110/CsaV3_5G023610/CsaV3_5G004150/CsaV3_4G000590	CsaV3_UNG071590/CsaV3_6G039890/-/CsaV3_2G004110/CsaV3_5G023610/CsaV3_5G004150/CsaV3_4G000590	csv:101204181/csv:101221855/csv:101212275/csv:101202756/csv:101212380/csv:101217863/csv:101208672	7	3	CsaV3_2G004110/CsaV3_5G023610/CsaV3_5G004150	4	CsaV3_UNG071590/CsaV3_6G039890/novel.1061/CsaV3_4G000590
csv01210	2-Oxocarboxylic acid metabolism	3/513	46/4153	0.935895	0.999999	CsaV3_7G033940/CsaV3_1G044260/novel.202	CsaV3_7G033940/CsaV3_1G044260/-	csv:101212146/csv:101208212/csv:101210312	3	1	CsaV3_7G033940	2	CsaV3_1G044260/novel.202
csv00908	Zeatin biosynthesis	1/513	21/4153	0.937709	0.999999	CsaV3_4G036030	CsaV3_4G036030	csv:101217899	1	0		1	CsaV3_4G036030
csv01200	Carbon metabolism	23/513	244/4153	0.941477	0.999999	CsaV3_6G000650/CsaV3_3G030440/CsaV3_3G042420/CsaV3_7G033940/CsaV3_5G034910/CsaV3_7G018620/CsaV3_1G043650/CsaV3_UNG071590/CsaV3_1G022960/novel.1061/CsaV3_7G021470/CsaV3_5G000220/CsaV3_2G034200/CsaV3_6G051820/CsaV3_4G004380/CsaV3_6G039090/CsaV3_1G016970/CsaV3_3G031190/CsaV3_4G027510/CsaV3_2G004390/CsaV3_1G039690/CsaV3_3G033630/CsaV3_2G035120	CsaV3_6G000650/CsaV3_3G030440/CsaV3_3G042420/CsaV3_7G033940/CsaV3_5G034910/CsaV3_7G018620/CsaV3_1G043650/CsaV3_UNG071590/CsaV3_1G022960/-/CsaV3_7G021470/CsaV3_5G000220/CsaV3_2G034200/CsaV3_6G051820/CsaV3_4G004380/CsaV3_6G039090/CsaV3_1G016970/CsaV3_3G031190/CsaV3_4G027510/CsaV3_2G004390/CsaV3_1G039690/CsaV3_3G033630/CsaV3_2G035120	csv:101220896/csv:101220055/csv:101213516/csv:101212146/csv:101211316/csv:101213467/csv:101222552/csv:101204181/csv:101211372/csv:101212275/csv:101219476/csv:101208410/csv:101209273/csv:101215498/csv:101202786/csv:101207975/csv:101223065/csv:101219910/csv:101207741/csv:101218606/csv:101218750/csv:101209181/csv:101214114	23	15	CsaV3_6G000650/CsaV3_3G030440/CsaV3_3G042420/CsaV3_7G033940/CsaV3_7G018620/CsaV3_1G022960/CsaV3_7G021470/CsaV3_6G051820/CsaV3_4G004380/CsaV3_6G039090/CsaV3_1G016970/CsaV3_4G027510/CsaV3_2G004390/CsaV3_3G033630/CsaV3_2G035120	8	CsaV3_5G034910/CsaV3_1G043650/CsaV3_UNG071590/novel.1061/CsaV3_5G000220/CsaV3_2G034200/CsaV3_3G031190/CsaV3_1G039690
csv00220	Arginine biosynthesis	2/513	35/4153	0.941963	0.999999	CsaV3_7G033940/CsaV3_4G004380	CsaV3_7G033940/CsaV3_4G004380	csv:101212146/csv:101202786	2	2	CsaV3_7G033940/CsaV3_4G004380	0
csv03040	Spliceosome	14/513	160/4153	0.943181	0.999999	CsaV3_2G009170/CsaV3_1G017170/CsaV3_7G005550/CsaV3_6G047540/CsaV3_5G031680/CsaV3_1G014700/CsaV3_6G040400/CsaV3_3G014050/CsaV3_1G014490/CsaV3_3G047170/CsaV3_UNG075590/CsaV3_6G017140/CsaV3_1G007020/CsaV3_5G026520	CsaV3_2G009170/CsaV3_1G017170/CsaV3_7G005550/CsaV3_6G047540/CsaV3_5G031680/CsaV3_1G014700/CsaV3_6G040400/CsaV3_3G014050/CsaV3_1G014490/CsaV3_3G047170/CsaV3_UNG075590/CsaV3_6G017140/CsaV3_1G007020/CsaV3_5G026520	csv:101215564/csv:101218920/csv:101216712/csv:101217009/csv:101213165/csv:101221461/csv:101208560/csv:101216537/csv:101221685/csv:101217802/csv:101221493/csv:101217986/csv:101218284/csv:101211905	14	2	CsaV3_1G017170/CsaV3_1G014700	12	CsaV3_2G009170/CsaV3_7G005550/CsaV3_6G047540/CsaV3_5G031680/CsaV3_6G040400/CsaV3_3G014050/CsaV3_1G014490/CsaV3_3G047170/CsaV3_UNG075590/CsaV3_6G017140/CsaV3_1G007020/CsaV3_5G026520
csv00770	Pantothenate and CoA biosynthesis	1/513	23/4153	0.952218	0.999999	CsaV3_1G044260	CsaV3_1G044260	csv:101208212	1	0		1	CsaV3_1G044260
csv03420	Nucleotide excision repair	3/513	50/4153	0.956507	0.999999	CsaV3_1G031640/CsaV3_6G046400/CsaV3_4G033030	CsaV3_1G031640/CsaV3_6G046400/CsaV3_4G033030	csv:101219981/csv:101218071/csv:101202933	3	0		3	CsaV3_1G031640/CsaV3_6G046400/CsaV3_4G033030
csv00380	Tryptophan metabolism	2/513	38/4153	0.958259	0.999999	CsaV3_2G004110/CsaV3_6G028580	CsaV3_2G004110/CsaV3_6G028580	csv:101202756/csv:101221248	2	2	CsaV3_2G004110/CsaV3_6G028580	0
csv04120	Ubiquitin mediated proteolysis	7/513	98/4153	0.967313	0.999999	CsaV3_5G000720/CsaV3_3G017700/CsaV3_3G041070/CsaV3_3G036630/CsaV3_5G031430/CsaV3_6G040090/novel.915	CsaV3_5G000720/CsaV3_3G017700/CsaV3_3G041070/CsaV3_3G036630/CsaV3_5G031430/CsaV3_6G040090/-	csv:101220694/csv:101206998/csv:101211398/csv:101205886/csv:101218512/csv:101203488/csv:101209382	7	4	CsaV3_3G017700/CsaV3_3G041070/CsaV3_3G036630/novel.915	3	CsaV3_5G000720/CsaV3_5G031430/CsaV3_6G040090
csv00190	Oxidative phosphorylation	11/513	141/4153	0.970502	0.999999	CsaV3_6G025260/CsaV3_2G029210/CsaV3_6G008400/CsaV3_3G026760/CsaV3_6G002740/CsaV3_5G036890/CsaV3_UNG209120/CsaV3_UNG208520/CsaV3_3G040000/CsaV3_5G037860/CsaV3_UNG208530	CsaV3_6G025260/CsaV3_2G029210/CsaV3_6G008400/CsaV3_3G026760/CsaV3_6G002740/CsaV3_5G036890/CsaV3_UNG209120/CsaV3_UNG208520/CsaV3_3G040000/CsaV3_5G037860/CsaV3_UNG208530	csv:11123862/csv:101209817/csv:101214636/csv:101217221/csv:101211740/csv:101216485/csv:11123889/csv:11123862/csv:101217015/csv:101211115/csv:11123862	11	5	CsaV3_6G025260/CsaV3_2G029210/CsaV3_6G008400/CsaV3_6G002740/CsaV3_UNG209120	6	CsaV3_3G026760/CsaV3_5G036890/CsaV3_UNG208520/CsaV3_3G040000/CsaV3_5G037860/CsaV3_UNG208530
csv04136	Autophagy - other	1/513	30/4153	0.981131	0.999999	CsaV3_2G007690	CsaV3_2G007690	csv:101216810	1	1	CsaV3_2G007690	0
csv00520	Amino sugar and nucleotide sugar metabolism	8/513	116/4153	0.981346	0.999999	CsaV3_5G003330/CsaV3_6G006740/CsaV3_7G026310/CsaV3_2G007810/CsaV3_4G001040/CsaV3_5G004970/CsaV3_4G001060/CsaV3_3G020950	CsaV3_5G003330/CsaV3_6G006740/CsaV3_7G026310/CsaV3_2G007810/CsaV3_4G001040/CsaV3_5G004970/CsaV3_4G001060/CsaV3_3G020950	csv:101205821/csv:101213366/csv:101209561/csv:101214888/csv:101213153/csv:101220595/csv:101211214/csv:101223130	8	0		8	CsaV3_5G003330/CsaV3_6G006740/CsaV3_7G026310/CsaV3_2G007810/CsaV3_4G001040/CsaV3_5G004970/CsaV3_4G001060/CsaV3_3G020950
csv00970	Aminoacyl-tRNA biosynthesis	2/513	51/4153	0.990468	0.999999	CsaV3_5G014470/CsaV3_2G033230	CsaV3_5G014470/CsaV3_2G033230	csv:101203149/csv:101221612	2	1	CsaV3_2G033230	1	CsaV3_5G014470
csv03018	RNA degradation	4/513	93/4153	0.997987	0.999999	CsaV3_6G009310/CsaV3_6G038490/CsaV3_5G034720/CsaV3_5G006110	CsaV3_6G009310/CsaV3_6G038490/CsaV3_5G034720/CsaV3_5G006110	csv:101203071/csv:101219801/csv:101208774/csv:101205035	4	3	CsaV3_6G009310/CsaV3_5G034720/CsaV3_5G006110	1	CsaV3_6G038490
csv03008	Ribosome biogenesis in eukaryotes	3/513	82/4153	0.998531	0.999999	CsaV3_6G046130/CsaV3_7G027900/CsaV3_6G044000	CsaV3_6G046130/CsaV3_7G027900/CsaV3_6G044000	csv:101217835/csv:101222973/csv:101205903	3	3	CsaV3_6G046130/CsaV3_7G027900/CsaV3_6G044000	0
csv03015	mRNA surveillance pathway	4/513	97/4153	0.998677	0.999999	CsaV3_2G002500/CsaV3_3G032960/CsaV3_3G012160/CsaV3_6G017140	CsaV3_2G002500/CsaV3_3G032960/CsaV3_3G012160/CsaV3_6G017140	csv:101206275/csv:101213262/csv:101209828/csv:101217986	4	2	CsaV3_2G002500/CsaV3_3G012160	2	CsaV3_3G032960/CsaV3_6G017140
csv03010	Ribosome	12/513	277/4153	0.999999	0.999999	CsaV3_6G045270/CsaV3_2G026730/CsaV3_5G031430/CsaV3_2G033020/CsaV3_UNG209010/CsaV3_4G007890/CsaV3_4G031420/CsaV3_3G007620/novel.801/CsaV3_1G045700/CsaV3_5G001930/CsaV3_1G042100	CsaV3_6G045270/CsaV3_2G026730/CsaV3_5G031430/CsaV3_2G033020/CsaV3_UNG209010/CsaV3_4G007890/CsaV3_4G031420/CsaV3_3G007620/-/CsaV3_1G045700/CsaV3_5G001930/CsaV3_1G042100	csv:101210610/csv:101219715/csv:101218512/csv:101221429/csv:3429293/csv:101214864/csv:101222895/csv:101202814/csv:101217104/csv:101209776/csv:101207012/csv:101204062	12	3	CsaV3_2G026730/CsaV3_UNG209010/novel.801	9	CsaV3_6G045270/CsaV3_5G031430/CsaV3_2G033020/CsaV3_4G007890/CsaV3_4G031420/CsaV3_3G007620/CsaV3_1G045700/CsaV3_5G001930/CsaV3_1G042100

## Sheet: XS_30vsXN_30DAP KEGG
KEGGID	Description	GeneRatio	BgRatio	pvalue	padj	geneID	geneName	keggID	Count	Up	Up_Gene_names	Down	Down_Gene_names
csv00030	Pentose phosphate pathway	25/880	47/4182	1.07074e-06	0.000120994	CsaV3_5G028300/CsaV3_2G003650/CsaV3_5G033390/CsaV3_5G034910/CsaV3_5G003980/CsaV3_2G004240/CsaV3_6G048080/CsaV3_3G023460/CsaV3_6G006270/CsaV3_5G028490/CsaV3_5G038830/CsaV3_7G021470/CsaV3_4G004200/CsaV3_4G037690/CsaV3_2G028640/CsaV3_6G040430/CsaV3_6G004010/CsaV3_1G037750/CsaV3_5G028690/CsaV3_1G016970/CsaV3_1G016980/CsaV3_2G007280/CsaV3_1G046070/CsaV3_6G048680/CsaV3_4G008960	CsaV3_5G028300/CsaV3_2G003650/CsaV3_5G033390/CsaV3_5G034910/CsaV3_5G003980/CsaV3_2G004240/CsaV3_6G048080/CsaV3_3G023460/CsaV3_6G006270/CsaV3_5G028490/CsaV3_5G038830/CsaV3_7G021470/CsaV3_4G004200/CsaV3_4G037690/CsaV3_2G028640/CsaV3_6G040430/CsaV3_6G004010/CsaV3_1G037750/CsaV3_5G028690/CsaV3_1G016970/CsaV3_1G016980/CsaV3_2G007280/CsaV3_1G046070/CsaV3_6G048680/CsaV3_4G008960	csv:101218883/csv:101208699/csv:101210739/csv:101211316/csv:101215470/csv:101221375/csv:101211230/csv:101220704/csv:101206943/csv:101212988/csv:101209197/csv:101219476/csv:101204973/csv:101208728/csv:101217944/csv:101209044/csv:101205576/csv:101214374/csv:101218080/csv:101223065/csv:101223065/csv:101221775/csv:101215219/csv:101203616/csv:101219465	25	13	CsaV3_5G028300/CsaV3_5G003980/CsaV3_2G004240/CsaV3_6G006270/CsaV3_5G028490/CsaV3_5G038830/CsaV3_4G037690/CsaV3_2G028640/CsaV3_6G040430/CsaV3_1G037750/CsaV3_5G028690/CsaV3_1G046070/CsaV3_6G048680	12	CsaV3_2G003650/CsaV3_5G033390/CsaV3_5G034910/CsaV3_6G048080/CsaV3_3G023460/CsaV3_7G021470/CsaV3_4G004200/CsaV3_6G004010/CsaV3_1G016970/CsaV3_1G016980/CsaV3_2G007280/CsaV3_4G008960
csv00196	Photosynthesis - antenna proteins	13/880	20/4182	2.56543e-05	0.00144947	CsaV3_4G026100/CsaV3_1G005600/CsaV3_6G005340/CsaV3_5G039350/CsaV3_5G030270/CsaV3_1G032510/CsaV3_6G013800/CsaV3_6G051520/CsaV3_1G002410/CsaV3_7G002620/CsaV3_2G027790/CsaV3_1G019610/CsaV3_1G041230	CsaV3_4G026100/CsaV3_1G005600/CsaV3_6G005340/CsaV3_5G039350/CsaV3_5G030270/CsaV3_1G032510/CsaV3_6G013800/CsaV3_6G051520/CsaV3_1G002410/CsaV3_7G002620/CsaV3_2G027790/CsaV3_1G019610/CsaV3_1G041230	csv:101208740/csv:101218675/csv:101204705/csv:101218137/csv:101214055/csv:101211276/csv:101213845/csv:101221671/csv:101222701/csv:101212963/csv:101219846/csv:101204705/csv:101211430	13	12	CsaV3_4G026100/CsaV3_1G005600/CsaV3_6G005340/CsaV3_5G039350/CsaV3_5G030270/CsaV3_1G032510/CsaV3_6G013800/CsaV3_6G051520/CsaV3_1G002410/CsaV3_7G002620/CsaV3_1G019610/CsaV3_1G041230	1	CsaV3_2G027790
csv00010	Glycolysis / Gluconeogenesis	43/880	117/4182	5.48383e-05	0.00206558	CsaV3_1G009410/CsaV3_7G022930/CsaV3_5G028300/CsaV3_2G003650/CsaV3_6G040390/CsaV3_2G013320/CsaV3_4G031770/CsaV3_6G007280/CsaV3_6G013490/CsaV3_6G040340/CsaV3_4G025320/CsaV3_7G024950/CsaV3_6G048080/CsaV3_1G032330/CsaV3_3G023460/CsaV3_2G008560/CsaV3_6G001210/CsaV3_4G017590/CsaV3_4G013550/CsaV3_7G022960/CsaV3_7G021470/CsaV3_3G045830/CsaV3_3G020130/CsaV3_2G015690/CsaV3_5G034210/CsaV3_4G004200/CsaV3_3G0…	CsaV3_1G009410/CsaV3_7G022930/CsaV3_5G028300/CsaV3_2G003650/CsaV3_6G040390/CsaV3_2G013320/CsaV3_4G031770/CsaV3_6G007280/CsaV3_6G013490/CsaV3_6G040340/CsaV3_4G025320/CsaV3_7G024950/CsaV3_6G048080/CsaV3_1G032330/CsaV3_3G023460/CsaV3_2G008560/CsaV3_6G001210/CsaV3_4G017590/CsaV3_4G013550/CsaV3_7G022960/CsaV3_7G021470/CsaV3_3G045830/CsaV3_3G020130/CsaV3_2G015690/CsaV3_5G034210/CsaV3_4G004200/CsaV3_3G0…	csv:101213074/csv:101215513/csv:101218883/csv:101208699/csv:101208322/csv:101218017/csv:101218311/csv:101208145/csv:101203472/csv:101207102/csv:101203731/csv:101209854/csv:101211230/csv:101204247/csv:101220704/csv:101220852/csv:101214545/csv:101216029/csv:101217925/csv:101215988/csv:101219476/csv:101216058/csv:101203579/csv:101213372/csv:101220730/csv:101204973/csv:101206887/csv:101208728/csv:101…	43	34	CsaV3_1G009410/CsaV3_7G022930/CsaV3_5G028300/CsaV3_6G040390/CsaV3_2G013320/CsaV3_4G031770/CsaV3_6G007280/CsaV3_6G013490/CsaV3_6G040340/CsaV3_4G025320/CsaV3_7G024950/CsaV3_1G032330/CsaV3_2G008560/CsaV3_6G001210/CsaV3_4G017590/CsaV3_4G013550/CsaV3_7G022960/CsaV3_3G045830/CsaV3_3G020130/CsaV3_2G015690/CsaV3_5G034210/CsaV3_3G021780/CsaV3_4G037690/CsaV3_2G028640/CsaV3_5G010390/CsaV3_4G025330/CsaV3_6G0…	9	CsaV3_2G003650/CsaV3_6G048080/CsaV3_3G023460/CsaV3_7G021470/CsaV3_4G004200/CsaV3_6G004010/CsaV3_5G021900/CsaV3_4G028150/CsaV3_4G008960
csv00190	Oxidative phosphorylation	49/880	142/4182	0.000109599	0.00309616	CsaV3_6G049050/CsaV3_3G010470/CsaV3_4G027390/CsaV3_2G029310/CsaV3_4G001330/CsaV3_5G036470/CsaV3_3G006950/CsaV3_3G010390/CsaV3_6G007320/CsaV3_7G033710/CsaV3_2G001570/CsaV3_2G007830/CsaV3_5G005640/CsaV3_3G010400/CsaV3_7G031080/CsaV3_7G033840/CsaV3_3G017880/CsaV3_1G006620/CsaV3_5G034810/CsaV3_5G028650/CsaV3_6G040700/CsaV3_3G046610/CsaV3_2G008520/CsaV3_3G041630/CsaV3_5G036890/CsaV3_2G036030/CsaV3_3G0…	CsaV3_6G049050/CsaV3_3G010470/CsaV3_4G027390/CsaV3_2G029310/CsaV3_4G001330/CsaV3_5G036470/CsaV3_3G006950/CsaV3_3G010390/CsaV3_6G007320/CsaV3_7G033710/CsaV3_2G001570/CsaV3_2G007830/CsaV3_5G005640/CsaV3_3G010400/CsaV3_7G031080/CsaV3_7G033840/CsaV3_3G017880/CsaV3_1G006620/CsaV3_5G034810/CsaV3_5G028650/CsaV3_6G040700/CsaV3_3G046610/CsaV3_2G008520/CsaV3_3G041630/CsaV3_5G036890/CsaV3_2G036030/CsaV3_3G0…	csv:101218747/csv:101206104/csv:101209202/csv:101209079/csv:101218811/csv:101204220/csv:101215010/csv:101205156/csv:101207411/csv:101216234/csv:101203477/csv:101214328/csv:101211349/csv:101205400/csv:101206351/csv:101214317/csv:101205189/csv:101213094/csv:101213164/csv:101205618/csv:101213525/csv:101205012/csv:101221564/csv:101203260/csv:101216485/csv:101204899/csv:101213721/csv:101222890/csv:101…	49	46	CsaV3_6G049050/CsaV3_3G010470/CsaV3_4G027390/CsaV3_2G029310/CsaV3_4G001330/CsaV3_5G036470/CsaV3_3G006950/CsaV3_3G010390/CsaV3_6G007320/CsaV3_7G033710/CsaV3_2G001570/CsaV3_2G007830/CsaV3_5G005640/CsaV3_3G010400/CsaV3_7G031080/CsaV3_7G033840/CsaV3_3G017880/CsaV3_1G006620/CsaV3_5G034810/CsaV3_5G028650/CsaV3_6G040700/CsaV3_3G046610/CsaV3_2G008520/CsaV3_3G041630/CsaV3_5G036890/CsaV3_2G036030/CsaV3_3G0…	3	CsaV3_5G037860/CsaV3_UNG208980/CsaV3_UNG203710
csv01200	Carbon metabolism	75/880	246/4182	0.00021111	0.00477108	CsaV3_1G009410/CsaV3_6G031490/CsaV3_7G022930/CsaV3_2G003650/CsaV3_6G040390/CsaV3_2G013320/CsaV3_4G031770/CsaV3_6G007280/CsaV3_5G033390/CsaV3_5G034910/CsaV3_6G013490/CsaV3_7G018620/CsaV3_6G040340/CsaV3_5G003980/CsaV3_6G039730/CsaV3_2G004240/CsaV3_6G048080/CsaV3_1G032330/CsaV3_3G023460/CsaV3_4G027510/CsaV3_6G044860/CsaV3_3G030440/CsaV3_6G000650/CsaV3_5G028880/CsaV3_4G008360/CsaV3_1G042270/CsaV3_1G0…	CsaV3_1G009410/CsaV3_6G031490/CsaV3_7G022930/CsaV3_2G003650/CsaV3_6G040390/CsaV3_2G013320/CsaV3_4G031770/CsaV3_6G007280/CsaV3_5G033390/CsaV3_5G034910/CsaV3_6G013490/CsaV3_7G018620/CsaV3_6G040340/CsaV3_5G003980/CsaV3_6G039730/CsaV3_2G004240/CsaV3_6G048080/CsaV3_1G032330/CsaV3_3G023460/CsaV3_4G027510/CsaV3_6G044860/CsaV3_3G030440/CsaV3_6G000650/CsaV3_5G028880/CsaV3_4G008360/CsaV3_1G042270/CsaV3_1G0…	csv:101213074/csv:101216662/csv:101215513/csv:101208699/csv:101208322/csv:101218017/csv:101218311/csv:101208145/csv:101210739/csv:101211316/csv:101203472/csv:101213467/csv:101207102/csv:101215470/csv:101219331/csv:101221375/csv:101211230/csv:101204247/csv:101220704/csv:101207741/csv:101207178/csv:101220055/csv:101220896/csv:101216256/csv:101207078/csv:101216190/csv:101206269/csv:101202934/csv:101…	75	55	CsaV3_1G009410/CsaV3_6G031490/CsaV3_7G022930/CsaV3_6G040390/CsaV3_2G013320/CsaV3_4G031770/CsaV3_6G007280/CsaV3_6G013490/CsaV3_6G040340/CsaV3_5G003980/CsaV3_6G039730/CsaV3_2G004240/CsaV3_1G032330/CsaV3_4G027510/CsaV3_3G030440/CsaV3_6G000650/CsaV3_5G028880/CsaV3_4G008360/CsaV3_1G042270/CsaV3_1G007500/CsaV3_3G000370/CsaV3_3G031010/CsaV3_6G001210/CsaV3_6G006270/CsaV3_1G010620/CsaV3_6G007490/CsaV3_5G0…	20	CsaV3_2G003650/CsaV3_5G033390/CsaV3_5G034910/CsaV3_7G018620/CsaV3_6G048080/CsaV3_3G023460/CsaV3_6G044860/CsaV3_6G043980/CsaV3_4G028640/CsaV3_7G021470/CsaV3_1G009520/CsaV3_3G000510/CsaV3_4G004200/CsaV3_3G000530/CsaV3_6G004010/CsaV3_1G016970/CsaV3_1G016980/CsaV3_5G021900/CsaV3_2G007280/CsaV3_4G008960
csv00195	Photosynthesis	20/880	52/4182	0.00293286	0.0552355	CsaV3_3G013420/CsaV3_2G010090/CsaV3_6G049050/CsaV3_2G009680/CsaV3_6G041600/CsaV3_6G052210/CsaV3_7G004300/CsaV3_4G007600/CsaV3_1G011330/CsaV3_7G027520/CsaV3_3G046150/CsaV3_1G046680/CsaV3_6G052330/CsaV3_1G015100/CsaV3_3G013320/CsaV3_3G004330/CsaV3_6G042680/CsaV3_UNG203710/CsaV3_4G026390/CsaV3_1G025480	CsaV3_3G013420/CsaV3_2G010090/CsaV3_6G049050/CsaV3_2G009680/CsaV3_6G041600/CsaV3_6G052210/CsaV3_7G004300/CsaV3_4G007600/CsaV3_1G011330/CsaV3_7G027520/CsaV3_3G046150/CsaV3_1G046680/CsaV3_6G052330/CsaV3_1G015100/CsaV3_3G013320/CsaV3_3G004330/CsaV3_6G042680/CsaV3_UNG203710/CsaV3_4G026390/CsaV3_1G025480	csv:101207214/csv:101203850/csv:101218747/csv:101208674/csv:101204396/csv:101209832/csv:101204833/csv:101215781/csv:101209135/csv:101218005/csv:101211484/csv:101215480/csv:101216935/csv:101209111/csv:101206257/csv:101218641/csv:101203080/csv:3429376/csv:3429278/csv:3429275	20	17	CsaV3_3G013420/CsaV3_2G010090/CsaV3_6G049050/CsaV3_2G009680/CsaV3_6G041600/CsaV3_6G052210/CsaV3_7G004300/CsaV3_4G007600/CsaV3_1G011330/CsaV3_7G027520/CsaV3_3G046150/CsaV3_1G046680/CsaV3_6G052330/CsaV3_1G015100/CsaV3_3G013320/CsaV3_3G004330/CsaV3_6G042680	3	CsaV3_UNG203710/CsaV3_4G026390/CsaV3_1G025480
csv00670	One carbon pool by folate	9/880	17/4182	0.00365694	0.0590335	CsaV3_1G042270/CsaV3_1G010620/CsaV3_3G002580/CsaV3_4G028640/CsaV3_6G005120/CsaV3_2G030460/CsaV3_1G001940/CsaV3_6G005110/CsaV3_1G010170	CsaV3_1G042270/CsaV3_1G010620/CsaV3_3G002580/CsaV3_4G028640/CsaV3_6G005120/CsaV3_2G030460/CsaV3_1G001940/CsaV3_6G005110/CsaV3_1G010170	csv:101216190/csv:101209820/csv:101222497/csv:101215287/csv:101222878/csv:101222345/csv:101211739/csv:101222878/csv:101206006	9	8	CsaV3_1G042270/CsaV3_1G010620/CsaV3_3G002580/CsaV3_6G005120/CsaV3_2G030460/CsaV3_1G001940/CsaV3_6G005110/CsaV3_1G010170	1	CsaV3_4G028640
csv00051	Fructose and mannose metabolism	18/880	53/4182	0.0195053	0.262329	CsaV3_4G031770/CsaV3_6G048080/CsaV3_3G023460/CsaV3_5G039820/CsaV3_7G021470/CsaV3_3G045830/CsaV3_2G015690/CsaV3_4G004200/CsaV3_4G037690/CsaV3_6G012900/CsaV3_6G040430/CsaV3_6G004010/CsaV3_2G001890/CsaV3_5G028690/CsaV3_1G046070/CsaV3_2G008080/CsaV3_6G048680/CsaV3_4G008960	CsaV3_4G031770/CsaV3_6G048080/CsaV3_3G023460/CsaV3_5G039820/CsaV3_7G021470/CsaV3_3G045830/CsaV3_2G015690/CsaV3_4G004200/CsaV3_4G037690/CsaV3_6G012900/CsaV3_6G040430/CsaV3_6G004010/CsaV3_2G001890/CsaV3_5G028690/CsaV3_1G046070/CsaV3_2G008080/CsaV3_6G048680/CsaV3_4G008960	csv:101218311/csv:101211230/csv:101220704/csv:101222882/csv:101219476/csv:101216058/csv:101213372/csv:101204973/csv:101208728/csv:101205185/csv:101209044/csv:101205576/csv:101218300/csv:101218080/csv:101215219/csv:101209640/csv:101203616/csv:101219465	18	10	CsaV3_4G031770/CsaV3_3G045830/CsaV3_2G015690/CsaV3_4G037690/CsaV3_6G012900/CsaV3_6G040430/CsaV3_2G001890/CsaV3_5G028690/CsaV3_1G046070/CsaV3_6G048680	8	CsaV3_6G048080/CsaV3_3G023460/CsaV3_5G039820/CsaV3_7G021470/CsaV3_4G004200/CsaV3_6G004010/CsaV3_2G008080/CsaV3_4G008960
csv01230	Biosynthesis of amino acids	55/880	203/4182	0.0208934	0.262329	CsaV3_1G009410/CsaV3_7G022930/CsaV3_6G040390/CsaV3_2G013320/CsaV3_4G031770/CsaV3_5G034910/CsaV3_6G013490/CsaV3_2G030250/CsaV3_7G018620/CsaV3_6G040340/CsaV3_1G001680/CsaV3_5G003980/CsaV3_6G039730/CsaV3_7G030560/CsaV3_2G004240/CsaV3_6G048080/CsaV3_3G023460/CsaV3_6G000650/CsaV3_3G000370/CsaV3_1G041720/CsaV3_2G029790/CsaV3_3G031010/CsaV3_6G001210/CsaV3_3G043270/CsaV3_6G006270/CsaV3_5G031220/CsaV3_4G0…	CsaV3_1G009410/CsaV3_7G022930/CsaV3_6G040390/CsaV3_2G013320/CsaV3_4G031770/CsaV3_5G034910/CsaV3_6G013490/CsaV3_2G030250/CsaV3_7G018620/CsaV3_6G040340/CsaV3_1G001680/CsaV3_5G003980/CsaV3_6G039730/CsaV3_7G030560/CsaV3_2G004240/CsaV3_6G048080/CsaV3_3G023460/CsaV3_6G000650/CsaV3_3G000370/CsaV3_1G041720/CsaV3_2G029790/CsaV3_3G031010/CsaV3_6G001210/CsaV3_3G043270/CsaV3_6G006270/CsaV3_5G031220/CsaV3_4G0…	csv:101213074/csv:101215513/csv:101208322/csv:101218017/csv:101218311/csv:101211316/csv:101203472/csv:101213711/csv:101213467/csv:101207102/csv:101213747/csv:101215470/csv:101219331/csv:101213413/csv:101221375/csv:101211230/csv:101220704/csv:101220896/csv:101202934/csv:101218702/csv:101220636/csv:101207254/csv:101214545/csv:101222321/csv:101206943/csv:101220645/csv:101216029/csv:101212988/csv:101…	55	38	CsaV3_1G009410/CsaV3_7G022930/CsaV3_6G040390/CsaV3_2G013320/CsaV3_4G031770/CsaV3_6G013490/CsaV3_2G030250/CsaV3_6G040340/CsaV3_1G001680/CsaV3_5G003980/CsaV3_6G039730/CsaV3_7G030560/CsaV3_2G004240/CsaV3_6G000650/CsaV3_3G000370/CsaV3_1G041720/CsaV3_3G031010/CsaV3_6G001210/CsaV3_3G043270/CsaV3_6G006270/CsaV3_5G031220/CsaV3_4G017590/CsaV3_5G028490/CsaV3_4G013550/CsaV3_7G022960/CsaV3_4G027860/CsaV3_2G0…	17	CsaV3_5G034910/CsaV3_7G018620/CsaV3_6G048080/CsaV3_3G023460/CsaV3_2G029790/CsaV3_4G028640/CsaV3_7G021470/CsaV3_3G000510/CsaV3_3G011200/CsaV3_4G004200/CsaV3_2G025820/CsaV3_6G036360/CsaV3_3G000530/CsaV3_1G016970/CsaV3_1G016980/CsaV3_7G021940/CsaV3_4G008960
csv00860	Porphyrin and chlorophyll metabolism	15/880	44/4182	0.0304528	0.344117	CsaV3_4G031720/CsaV3_4G033870/CsaV3_2G030530/CsaV3_1G002370/CsaV3_6G050640/CsaV3_1G000080/CsaV3_1G043160/CsaV3_4G026340/CsaV3_1G030090/CsaV3_7G002150/CsaV3_1G024260/CsaV3_1G014120/CsaV3_2G033150/CsaV3_5G010770/CsaV3_2G028140	CsaV3_4G031720/CsaV3_4G033870/CsaV3_2G030530/CsaV3_1G002370/CsaV3_6G050640/CsaV3_1G000080/CsaV3_1G043160/CsaV3_4G026340/CsaV3_1G030090/CsaV3_7G002150/CsaV3_1G024260/CsaV3_1G014120/CsaV3_2G033150/CsaV3_5G010770/CsaV3_2G028140	csv:101219179/csv:101208554/csv:101220615/csv:101221755/csv:101217637/csv:101206600/csv:101217650/csv:101212175/csv:101214191/csv:101212759/csv:101222986/csv:101217499/csv:101222312/csv:101212245/csv:101203770	15	9	CsaV3_4G031720/CsaV3_4G033870/CsaV3_2G030530/CsaV3_1G002370/CsaV3_6G050640/CsaV3_1G000080/CsaV3_1G043160/CsaV3_4G026340/CsaV3_5G010770	6	CsaV3_1G030090/CsaV3_7G002150/CsaV3_1G024260/CsaV3_1G014120/CsaV3_2G033150/CsaV3_2G028140
csv00710	Carbon fixation in photosynthetic organisms	23/880	78/4182	0.047859	0.491643	CsaV3_1G009410/CsaV3_7G022930/CsaV3_4G031770/CsaV3_5G034910/CsaV3_6G013490/CsaV3_2G004240/CsaV3_3G030440/CsaV3_5G028880/CsaV3_4G008360/CsaV3_3G031010/CsaV3_6G001210/CsaV3_6G006270/CsaV3_5G031220/CsaV3_5G028490/CsaV3_7G022960/CsaV3_7G021470/CsaV3_2G024880/CsaV3_2G015690/CsaV3_6G040430/CsaV3_6G004010/CsaV3_1G037750/CsaV3_5G028690/CsaV3_UNG009100	CsaV3_1G009410/CsaV3_7G022930/CsaV3_4G031770/CsaV3_5G034910/CsaV3_6G013490/CsaV3_2G004240/CsaV3_3G030440/CsaV3_5G028880/CsaV3_4G008360/CsaV3_3G031010/CsaV3_6G001210/CsaV3_6G006270/CsaV3_5G031220/CsaV3_5G028490/CsaV3_7G022960/CsaV3_7G021470/CsaV3_2G024880/CsaV3_2G015690/CsaV3_6G040430/CsaV3_6G004010/CsaV3_1G037750/CsaV3_5G028690/CsaV3_UNG009100	csv:101213074/csv:101215513/csv:101218311/csv:101211316/csv:101203472/csv:101221375/csv:101220055/csv:101216256/csv:101207078/csv:101207254/csv:101214545/csv:101206943/csv:101220645/csv:101212988/csv:101215988/csv:101219476/csv:101207914/csv:101213372/csv:101209044/csv:101205576/csv:101214374/csv:101218080/csv:101212275	23	20	CsaV3_1G009410/CsaV3_7G022930/CsaV3_4G031770/CsaV3_6G013490/CsaV3_2G004240/CsaV3_3G030440/CsaV3_5G028880/CsaV3_4G008360/CsaV3_3G031010/CsaV3_6G001210/CsaV3_6G006270/CsaV3_5G031220/CsaV3_5G028490/CsaV3_7G022960/CsaV3_2G024880/CsaV3_2G015690/CsaV3_6G040430/CsaV3_1G037750/CsaV3_5G028690/CsaV3_UNG009100	3	CsaV3_5G034910/CsaV3_7G021470/CsaV3_6G004010
csv00500	Starch and sucrose metabolism	33/880	120/4182	0.052931	0.493861	CsaV3_3G036980/CsaV3_3G047730/CsaV3_5G028300/CsaV3_2G010460/CsaV3_3G002150/CsaV3_6G016450/CsaV3_7G028580/CsaV3_6G051510/CsaV3_1G032200/CsaV3_3G011520/CsaV3_2G014910/CsaV3_1G005170/CsaV3_7G002310/CsaV3_5G002020/CsaV3_6G051060/CsaV3_3G021110/CsaV3_1G012560/CsaV3_5G031700/CsaV3_2G017550/CsaV3_3G045830/CsaV3_2G012230/CsaV3_1G004550/CsaV3_5G028270/CsaV3_4G008840/CsaV3_1G041400/CsaV3_2G028640/CsaV3_4G0…	CsaV3_3G036980/CsaV3_3G047730/CsaV3_5G028300/CsaV3_2G010460/CsaV3_3G002150/CsaV3_6G016450/CsaV3_7G028580/CsaV3_6G051510/CsaV3_1G032200/CsaV3_3G011520/CsaV3_2G014910/CsaV3_1G005170/CsaV3_7G002310/CsaV3_5G002020/CsaV3_6G051060/CsaV3_3G021110/CsaV3_1G012560/CsaV3_5G031700/CsaV3_2G017550/CsaV3_3G045830/CsaV3_2G012230/CsaV3_1G004550/CsaV3_5G028270/CsaV3_4G008840/CsaV3_1G041400/CsaV3_2G028640/CsaV3_4G0…	csv:101210586/csv:101209348/csv:101218883/csv:101220742/csv:101213455/csv:101209204/csv:101207395/csv:101216214/csv:101205766/csv:101221739/csv:101208904/csv:101216865/csv:101216573/csv:101208719/csv:101213082/csv:101220298/csv:101213300/csv:101212688/csv:101208819/csv:101216058/csv:101216744/csv:101204835/csv:101219599/csv:101221832/csv:101213767/csv:101217944/csv:101212987/csv:101220898/csv:101…	33	26	CsaV3_3G036980/CsaV3_3G047730/CsaV3_5G028300/CsaV3_2G010460/CsaV3_3G002150/CsaV3_6G016450/CsaV3_7G028580/CsaV3_1G032200/CsaV3_2G014910/CsaV3_1G005170/CsaV3_7G002310/CsaV3_5G002020/CsaV3_3G021110/CsaV3_1G012560/CsaV3_2G017550/CsaV3_3G045830/CsaV3_1G004550/CsaV3_5G028270/CsaV3_4G008840/CsaV3_1G041400/CsaV3_2G028640/CsaV3_4G007080/CsaV3_2G033300/CsaV3_5G002050/CsaV3_2G001890/CsaV3_3G038290	7	CsaV3_6G051510/CsaV3_3G011520/CsaV3_6G051060/CsaV3_5G031700/CsaV3_2G012230/CsaV3_1G001640/CsaV3_6G000500
csv04626	Plant-pathogen interaction	39/880	146/4182	0.0568158	0.493861	CsaV3_1G000650/CsaV3_3G040820/CsaV3_6G039330/CsaV3_3G005930/CsaV3_2G015130/CsaV3_3G028080/CsaV3_4G027710/CsaV3_1G014860/CsaV3_1G033530/CsaV3_3G017490/CsaV3_3G015240/CsaV3_3G044850/CsaV3_3G017480/CsaV3_6G051540/CsaV3_1G004720/CsaV3_2G019610/CsaV3_5G035130/CsaV3_7G007580/CsaV3_7G008650/CsaV3_4G011890/CsaV3_5G000590/CsaV3_3G003160/CsaV3_1G005040/CsaV3_3G033720/CsaV3_1G004290/CsaV3_5G034300/CsaV3_2G0…	CsaV3_1G000650/CsaV3_3G040820/CsaV3_6G039330/CsaV3_3G005930/CsaV3_2G015130/CsaV3_3G028080/CsaV3_4G027710/CsaV3_1G014860/CsaV3_1G033530/CsaV3_3G017490/CsaV3_3G015240/CsaV3_3G044850/CsaV3_3G017480/CsaV3_6G051540/CsaV3_1G004720/CsaV3_2G019610/CsaV3_5G035130/CsaV3_7G007580/CsaV3_7G008650/CsaV3_4G011890/CsaV3_5G000590/CsaV3_3G003160/CsaV3_1G005040/CsaV3_3G033720/CsaV3_1G004290/CsaV3_5G034300/CsaV3_2G0…	csv:101215508/csv:101207567/csv:101212721/csv:101207531/csv:101204401/csv:101212985/csv:101205441/csv:101206440/csv:101202796/csv:101210914/csv:101212685/csv:101212011/csv:101210914/csv:101215973/csv:101207158/csv:101210865/csv:101208369/csv:101211323/csv:101219869/csv:101208990/csv:101221781/csv:101222825/csv:101215903/csv:101211735/csv:101220025/csv:101218433/csv:101203607/csv:101207390/csv:101…	39	16	CsaV3_6G039330/CsaV3_2G015130/CsaV3_3G028080/CsaV3_3G017490/CsaV3_3G015240/CsaV3_2G019610/CsaV3_7G007580/CsaV3_7G008650/CsaV3_3G003160/CsaV3_3G033720/CsaV3_2G029630/CsaV3_1G041870/CsaV3_1G033200/CsaV3_4G023180/CsaV3_1G033910/CsaV3_6G034010	23	CsaV3_1G000650/CsaV3_3G040820/CsaV3_3G005930/CsaV3_4G027710/CsaV3_1G014860/CsaV3_1G033530/CsaV3_3G044850/CsaV3_3G017480/CsaV3_6G051540/CsaV3_1G004720/CsaV3_5G035130/CsaV3_4G011890/CsaV3_5G000590/CsaV3_1G005040/CsaV3_1G004290/CsaV3_5G034300/CsaV3_5G033780/CsaV3_3G016490/CsaV3_4G002860/CsaV3_4G003580/CsaV3_5G018740/CsaV3_5G023410/CsaV3_7G032210
csv00100	Steroid biosynthesis	9/880	26/4182	0.0771918	0.613903	CsaV3_4G027880/CsaV3_3G046140/CsaV3_4G002070/CsaV3_7G030530/CsaV3_1G035670/CsaV3_4G002230/CsaV3_3G032020/CsaV3_7G033720/CsaV3_4G009240	CsaV3_4G027880/CsaV3_3G046140/CsaV3_4G002070/CsaV3_7G030530/CsaV3_1G035670/CsaV3_4G002230/CsaV3_3G032020/CsaV3_7G033720/CsaV3_4G009240	csv:101220288/csv:101220177/csv:101206897/csv:101213648/csv:101220009/csv:101205062/csv:101217389/csv:101215997/csv:101217570	9	6	CsaV3_4G002070/CsaV3_7G030530/CsaV3_1G035670/CsaV3_3G032020/CsaV3_7G033720/CsaV3_4G009240	3	CsaV3_4G027880/CsaV3_3G046140/CsaV3_4G002230
csv00630	Glyoxylate and dicarboxylate metabolism	19/880	66/4182	0.0835563	0.613903	CsaV3_6G031490/CsaV3_7G030560/CsaV3_4G008360/CsaV3_6G043980/CsaV3_1G010620/CsaV3_3G002580/CsaV3_5G031220/CsaV3_4G028640/CsaV3_7G002460/CsaV3_2G024880/CsaV3_1G009520/CsaV3_3G020130/CsaV3_2G030460/CsaV3_3G000510/CsaV3_6G039090/CsaV3_3G000530/CsaV3_5G021900/CsaV3_7G003590/CsaV3_3G040230	CsaV3_6G031490/CsaV3_7G030560/CsaV3_4G008360/CsaV3_6G043980/CsaV3_1G010620/CsaV3_3G002580/CsaV3_5G031220/CsaV3_4G028640/CsaV3_7G002460/CsaV3_2G024880/CsaV3_1G009520/CsaV3_3G020130/CsaV3_2G030460/CsaV3_3G000510/CsaV3_6G039090/CsaV3_3G000530/CsaV3_5G021900/CsaV3_7G003590/CsaV3_3G040230	csv:101216662/csv:101213413/csv:101207078/csv:101206142/csv:101209820/csv:101222497/csv:101220645/csv:101215287/csv:101214645/csv:101207914/csv:101214523/csv:101203579/csv:101222345/csv:101217715/csv:101207975/csv:101221392/csv:101222352/csv:101221392/csv:101214380	19	13	CsaV3_6G031490/CsaV3_7G030560/CsaV3_4G008360/CsaV3_1G010620/CsaV3_3G002580/CsaV3_5G031220/CsaV3_7G002460/CsaV3_2G024880/CsaV3_3G020130/CsaV3_2G030460/CsaV3_6G039090/CsaV3_7G003590/CsaV3_3G040230	6	CsaV3_6G043980/CsaV3_4G028640/CsaV3_1G009520/CsaV3_3G000510/CsaV3_3G000530/CsaV3_5G021900
csv00780	Biotin metabolism	5/880	833820	0.0869243	0.613903	CsaV3_4G004790/CsaV3_1G042350/CsaV3_4G023750/CsaV3_5G001240/CsaV3_1G031330	CsaV3_4G004790/CsaV3_1G042350/CsaV3_4G023750/CsaV3_5G001240/CsaV3_1G031330	csv:101207195/csv:101217385/csv:101210519/csv:101213297/csv:101216016	5	4	CsaV3_4G004790/CsaV3_1G042350/CsaV3_4G023750/CsaV3_5G001240	1	CsaV3_1G031330
csv00020	Citrate cycle (TCA cycle)	14/880	48/4182	0.115227	0.765918	CsaV3_2G024770/CsaV3_6G039730/CsaV3_1G032330/CsaV3_4G008360/CsaV3_1G007500/CsaV3_6G007490/CsaV3_5G034210/CsaV3_3G000510/CsaV3_5G026370/CsaV3_3G000530/CsaV3_6G007900/CsaV3_7G003590/CsaV3_3G027530/CsaV3_4G005080	CsaV3_2G024770/CsaV3_6G039730/CsaV3_1G032330/CsaV3_4G008360/CsaV3_1G007500/CsaV3_6G007490/CsaV3_5G034210/CsaV3_3G000510/CsaV3_5G026370/CsaV3_3G000530/CsaV3_6G007900/CsaV3_7G003590/CsaV3_3G027530/CsaV3_4G005080	csv:101209126/csv:101219331/csv:101204247/csv:101207078/csv:101206269/csv:101205496/csv:101220730/csv:101217715/csv:101208883/csv:101221392/csv:101220981/csv:101221392/csv:101220767/csv:101211616	14	12	CsaV3_2G024770/CsaV3_6G039730/CsaV3_1G032330/CsaV3_4G008360/CsaV3_1G007500/CsaV3_6G007490/CsaV3_5G034210/CsaV3_5G026370/CsaV3_6G007900/CsaV3_7G003590/CsaV3_3G027530/CsaV3_4G005080	2	CsaV3_3G000510/CsaV3_3G000530
csv01210	2-Oxocarboxylic acid metabolism	13/880	46/4182	0.152429	0.80271	CsaV3_1G001680/CsaV3_6G039730/CsaV3_3G031010/CsaV3_5G031220/CsaV3_2G024880/CsaV3_2G031570/CsaV3_3G000510/CsaV3_3G011200/CsaV3_2G025820/CsaV3_1G043200/CsaV3_3G000530/CsaV3_6G044190/CsaV3_7G003590	CsaV3_1G001680/CsaV3_6G039730/CsaV3_3G031010/CsaV3_5G031220/CsaV3_2G024880/CsaV3_2G031570/CsaV3_3G000510/CsaV3_3G011200/CsaV3_2G025820/CsaV3_1G043200/CsaV3_3G000530/CsaV3_6G044190/CsaV3_7G003590	csv:101213747/csv:101219331/csv:101207254/csv:101220645/csv:101207914/csv:101203871/csv:101217715/csv:101217323/csv:101214004/csv:101210312/csv:101221392/csv:101223180/csv:101221392	13	8	CsaV3_1G001680/CsaV3_6G039730/CsaV3_3G031010/CsaV3_5G031220/CsaV3_2G024880/CsaV3_2G031570/CsaV3_6G044190/CsaV3_7G003590	5	CsaV3_3G000510/CsaV3_3G011200/CsaV3_2G025820/CsaV3_1G043200/CsaV3_3G000530
csv00590	Arachidonic acid metabolism	5/880	14/4182	0.152902	0.80271	CsaV3_4G027880/CsaV3_5G026050/novel.773/CsaV3_2G024290/CsaV3_4G036450	CsaV3_4G027880/CsaV3_5G026050/-/CsaV3_2G024290/CsaV3_4G036450	csv:101220288/csv:101214564/csv:101222193/csv:101215364/csv:101211107	5	2	CsaV3_5G026050/novel.773	3	CsaV3_4G027880/CsaV3_2G024290/CsaV3_4G036450
csv00640	Propanoate metabolism	11/880	38/4182	0.157909	0.80271	CsaV3_6G044860/CsaV3_1G007500/CsaV3_3G014830/CsaV3_6G007490/CsaV3_7G002460/CsaV3_3G020130/CsaV3_6G041570/CsaV3_1G041530/CsaV3_UNG137080/CsaV3_5G021900/CsaV3_4G008750	CsaV3_6G044860/CsaV3_1G007500/CsaV3_3G014830/CsaV3_6G007490/CsaV3_7G002460/CsaV3_3G020130/CsaV3_6G041570/CsaV3_1G041530/CsaV3_UNG137080/CsaV3_5G021900/CsaV3_4G008750	csv:101207178/csv:101206269/csv:101206829/csv:101205496/csv:101214645/csv:101203579/csv:101205130/csv:101216174/csv:101218159/csv:101222352/csv:101222930	11	6	CsaV3_1G007500/CsaV3_6G007490/CsaV3_7G002460/CsaV3_3G020130/CsaV3_UNG137080/CsaV3_4G008750	5	CsaV3_6G044860/CsaV3_3G014830/CsaV3_6G041570/CsaV3_1G041530/CsaV3_5G021900
csv04712	Circadian rhythm - plant	9/880	30/4182	0.161798	0.80271	CsaV3_7G024490/CsaV3_6G008360/CsaV3_1G044210/CsaV3_7G034990/CsaV3_3G046530/CsaV3_3G047490/CsaV3_1G045940/CsaV3_3G015190/CsaV3_6G044000	CsaV3_7G024490/CsaV3_6G008360/CsaV3_1G044210/CsaV3_7G034990/CsaV3_3G046530/CsaV3_3G047490/CsaV3_1G045940/CsaV3_3G015190/CsaV3_6G044000	csv:101216952/csv:101214878/csv:101207969/csv:101208149/csv:101205952/csv:101213649/csv:101203654/csv:101212197/csv:101205903	9	4	CsaV3_7G024490/CsaV3_3G046530/CsaV3_3G015190/CsaV3_6G044000	5	CsaV3_6G008360/CsaV3_1G044210/CsaV3_7G034990/CsaV3_3G047490/CsaV3_1G045940
csv00600	Sphingolipid metabolism	7/880	22/4182	0.162025	0.80271	CsaV3_6G048550/CsaV3_5G039980/CsaV3_5G014080/CsaV3_5G029180/CsaV3_1G035880/CsaV3_3G043840/CsaV3_6G008140	CsaV3_6G048550/CsaV3_5G039980/CsaV3_5G014080/CsaV3_5G029180/CsaV3_1G035880/CsaV3_3G043840/CsaV3_6G008140	csv:101205550/csv:101204709/csv:101212019/csv:101212167/csv:101209656/csv:101204972/csv:101217975	7	2	CsaV3_5G029180/CsaV3_1G035880	5	CsaV3_6G048550/CsaV3_5G039980/CsaV3_5G014080/CsaV3_3G043840/CsaV3_6G008140
csv00970	Aminoacyl-tRNA biosynthesis	14/880	51/4182	0.168316	0.80271	CsaV3_5G026430/CsaV3_4G036250/CsaV3_UNG110800/CsaV3_5G018610/CsaV3_3G047640/CsaV3_7G002150/CsaV3_3G018830/CsaV3_7G026620/CsaV3_1G039910/CsaV3_6G008710/CsaV3_4G000020/CsaV3_6G039980/CsaV3_3G046200/CsaV3_2G012390	CsaV3_5G026430/CsaV3_4G036250/CsaV3_UNG110800/CsaV3_5G018610/CsaV3_3G047640/CsaV3_7G002150/CsaV3_3G018830/CsaV3_7G026620/CsaV3_1G039910/CsaV3_6G008710/CsaV3_4G000020/CsaV3_6G039980/CsaV3_3G046200/CsaV3_2G012390	csv:101210109/csv:101211267/csv:101220233/csv:101211125/csv:101207397/csv:101212759/csv:101217773/csv:101216192/csv:101222059/csv:101209684/csv:101202872/csv:101223046/csv:101210985/csv:101209226	14	3	CsaV3_UNG110800/CsaV3_5G018610/CsaV3_2G012390	11	CsaV3_5G026430/CsaV3_4G036250/CsaV3_3G047640/CsaV3_7G002150/CsaV3_3G018830/CsaV3_7G026620/CsaV3_1G039910/CsaV3_6G008710/CsaV3_4G000020/CsaV3_6G039980/CsaV3_3G046200
csv00480	Glutathione metabolism	20/880	77/4182	0.174985	0.80271	CsaV3_5G002690/CsaV3_3G011090/CsaV3_2G007520/CsaV3_6G000030/CsaV3_3G011460/CsaV3_5G031670/CsaV3_5G000580/CsaV3_4G025690/CsaV3_4G025770/CsaV3_5G038830/CsaV3_4G006000/CsaV3_6G034310/CsaV3_4G025680/CsaV3_7G027540/CsaV3_1G005420/CsaV3_7G029060/CsaV3_4G036450/CsaV3_2G007280/CsaV3_5G023890/CsaV3_3G009990	CsaV3_5G002690/CsaV3_3G011090/CsaV3_2G007520/CsaV3_6G000030/CsaV3_3G011460/CsaV3_5G031670/CsaV3_5G000580/CsaV3_4G025690/CsaV3_4G025770/CsaV3_5G038830/CsaV3_4G006000/CsaV3_6G034310/CsaV3_4G025680/CsaV3_7G027540/CsaV3_1G005420/CsaV3_7G029060/CsaV3_4G036450/CsaV3_2G007280/CsaV3_5G023890/CsaV3_3G009990	csv:101216008/csv:101215496/csv:101219418/csv:101208623/csv:101207634/csv:101213410/csv:101222254/csv:105435246/csv:101214992/csv:101209197/csv:101211608/csv:101216755/csv:101214992/csv:101217298/csv:101218987/csv:101212291/csv:101211107/csv:101221775/csv:101215747/csv:101219529	20	15	CsaV3_5G002690/CsaV3_3G011090/CsaV3_2G007520/CsaV3_6G000030/CsaV3_3G011460/CsaV3_5G031670/CsaV3_5G000580/CsaV3_4G025690/CsaV3_5G038830/CsaV3_4G006000/CsaV3_6G034310/CsaV3_1G005420/CsaV3_7G029060/CsaV3_5G023890/CsaV3_3G009990	5	CsaV3_4G025770/CsaV3_4G025680/CsaV3_7G027540/CsaV3_4G036450/CsaV3_2G007280
csv03008	Ribosome biogenesis in eukaryotes	21/880	82/4182	0.185729	0.80271	CsaV3_5G037440/novel.634/CsaV3_1G007630/CsaV3_1G029680/CsaV3_1G031710/CsaV3_6G022650/CsaV3_4G006310/CsaV3_2G004440/CsaV3_1G037130/CsaV3_7G029310/CsaV3_1G029790/CsaV3_2G009090/CsaV3_6G043510/CsaV3_5G005970/CsaV3_4G009280/CsaV3_6G044000/CsaV3_1G039600/CsaV3_1G000640/CsaV3_UNG009110/CsaV3_4G030600/CsaV3_7G021630	CsaV3_5G037440/-/CsaV3_1G007630/CsaV3_1G029680/CsaV3_1G031710/CsaV3_6G022650/CsaV3_4G006310/CsaV3_2G004440/CsaV3_1G037130/CsaV3_7G029310/CsaV3_1G029790/CsaV3_2G009090/CsaV3_6G043510/CsaV3_5G005970/CsaV3_4G009280/CsaV3_6G044000/CsaV3_1G039600/CsaV3_1G000640/CsaV3_UNG009110/CsaV3_4G030600/CsaV3_7G021630	csv:101207909/csv:101221716/csv:101208620/csv:101211465/csv:101221320/csv:101213788/csv:101208103/csv:101217731/csv:101209097/csv:101207643/csv:101211465/csv:101216698/csv:101213034/csv:101206527/csv:101217101/csv:101205903/csv:101217092/csv:101215267/csv:101217384/csv:101217674/csv:101222795	21	7	CsaV3_1G029680/CsaV3_6G022650/CsaV3_1G029790/CsaV3_5G005970/CsaV3_6G044000/CsaV3_1G039600/CsaV3_UNG009110	14	CsaV3_5G037440/novel.634/CsaV3_1G007630/CsaV3_1G031710/CsaV3_4G006310/CsaV3_2G004440/CsaV3_1G037130/CsaV3_7G029310/CsaV3_2G009090/CsaV3_6G043510/CsaV3_4G009280/CsaV3_1G000640/CsaV3_4G030600/CsaV3_7G021630
csv00906	Carotenoid biosynthesis	9/880	31/4182	0.187982	0.80271	CsaV3_4G007180/CsaV3_5G002520/CsaV3_4G007140/CsaV3_4G007560/CsaV3_6G051790/CsaV3_2G001370/CsaV3_2G013780/CsaV3_4G017450/CsaV3_2G016630	CsaV3_4G007180/CsaV3_5G002520/CsaV3_4G007140/CsaV3_4G007560/CsaV3_6G051790/CsaV3_2G001370/CsaV3_2G013780/CsaV3_4G017450/CsaV3_2G016630	csv:101220226/csv:101214325/csv:101212508/csv:101214823/csv:101214535/csv:101213753/csv:101219340/csv:101219033/csv:101212903	9	5	CsaV3_5G002520/CsaV3_4G007560/CsaV3_2G001370/CsaV3_2G013780/CsaV3_2G016630	4	CsaV3_4G007180/CsaV3_4G007140/CsaV3_6G051790/CsaV3_4G017450
csv00531	Glycosaminoglycan degradation	5/880	15/4182	0.191798	0.80271	CsaV3_2G003320/CsaV3_2G016140/CsaV3_3G043840/CsaV3_1G002710/CsaV3_5G006710	CsaV3_2G003320/CsaV3_2G016140/CsaV3_3G043840/CsaV3_1G002710/CsaV3_5G006710	csv:101213905/csv:101220222/csv:101204972/csv:101205085/csv:101202942	5	4	CsaV3_2G003320/CsaV3_2G016140/CsaV3_1G002710/CsaV3_5G006710	1	CsaV3_3G043840
csv03060	Protein export	12/880	44/4182	0.199166	0.803778	CsaV3_4G033950/CsaV3_5G001960/CsaV3_4G001480/CsaV3_2G005090/CsaV3_3G007400/CsaV3_5G008920/CsaV3_6G040720/CsaV3_1G039080/CsaV3_1G043340/CsaV3_4G006230/CsaV3_5G030580/CsaV3_2G002780	CsaV3_4G033950/CsaV3_5G001960/CsaV3_4G001480/CsaV3_2G005090/CsaV3_3G007400/CsaV3_5G008920/CsaV3_6G040720/CsaV3_1G039080/CsaV3_1G043340/CsaV3_4G006230/CsaV3_5G030580/CsaV3_2G002780	csv:101221060/csv:101207505/csv:101215961/csv:101212303/csv:101220008/csv:101215389/csv:101209537/csv:101210158/csv:101217111/csv:101222972/csv:101207391/csv:101222464	12	9	CsaV3_5G001960/CsaV3_4G001480/CsaV3_2G005090/CsaV3_3G007400/CsaV3_5G008920/CsaV3_6G040720/CsaV3_1G039080/CsaV3_5G030580/CsaV3_2G002780	3	CsaV3_4G033950/CsaV3_1G043340/CsaV3_4G006230
csv00230	Purine metabolism	21/880	84/4182	0.219411	0.852745	CsaV3_5G028300/CsaV3_2G013320/CsaV3_5G004020/CsaV3_6G040340/CsaV3_2G026200/CsaV3_3G035840/CsaV3_3G027210/CsaV3_4G017590/CsaV3_3G012550/CsaV3_3G000300/CsaV3_3G007170/CsaV3_5G035210/CsaV3_3G021780/CsaV3_2G015340/CsaV3_2G030020/CsaV3_1G042760/CsaV3_1G016970/CsaV3_1G016980/CsaV3_3G000810/CsaV3_1G010170/CsaV3_4G011640	CsaV3_5G028300/CsaV3_2G013320/CsaV3_5G004020/CsaV3_6G040340/CsaV3_2G026200/CsaV3_3G035840/CsaV3_3G027210/CsaV3_4G017590/CsaV3_3G012550/CsaV3_3G000300/CsaV3_3G007170/CsaV3_5G035210/CsaV3_3G021780/CsaV3_2G015340/CsaV3_2G030020/CsaV3_1G042760/CsaV3_1G016970/CsaV3_1G016980/CsaV3_3G000810/CsaV3_1G010170/CsaV3_4G011640	csv:101218883/csv:101218017/csv:101216186/csv:101207102/csv:101208231/csv:101218678/csv:101217918/csv:101216029/csv:101216373/csv:101203894/csv:101217169/csv:101206975/csv:101206887/csv:101203840/csv:101217870/csv:101211977/csv:101223065/csv:101223065/csv:101215130/csv:101206006/csv:101212263	21	13	CsaV3_5G028300/CsaV3_2G013320/CsaV3_6G040340/CsaV3_2G026200/CsaV3_3G035840/CsaV3_4G017590/CsaV3_3G012550/CsaV3_3G007170/CsaV3_5G035210/CsaV3_3G021780/CsaV3_2G030020/CsaV3_3G000810/CsaV3_1G010170	8	CsaV3_5G004020/CsaV3_3G027210/CsaV3_3G000300/CsaV3_2G015340/CsaV3_1G042760/CsaV3_1G016970/CsaV3_1G016980/CsaV3_4G011640
csv00073	Cutin, suberine and wax biosynthesis	7/880	24/4182	0.226392	0.852745	CsaV3_3G010290/CsaV3_6G006560/CsaV3_5G002710/CsaV3_1G036060/CsaV3_6G049160/CsaV3_6G004090/CsaV3_6G014930	CsaV3_3G010290/CsaV3_6G006560/CsaV3_5G002710/CsaV3_1G036060/CsaV3_6G049160/CsaV3_6G004090/CsaV3_6G014930	csv:101221193/csv:101222843/csv:101216733/csv:101214516/csv:101216852/csv:101206763/csv:101209050	7	5	CsaV3_3G010290/CsaV3_6G006560/CsaV3_1G036060/CsaV3_6G049160/CsaV3_6G004090	2	CsaV3_5G002710/CsaV3_6G014930
csv00040	Pentose and glucuronate interconversions	20/880	82/4182	0.264389	0.96374	CsaV3_7G026200/CsaV3_5G035910/CsaV3_7G031000/CsaV3_4G025320/CsaV3_6G040000/CsaV3_4G024600/CsaV3_1G007900/CsaV3_1G009130/CsaV3_5G031360/CsaV3_3G021110/CsaV3_7G029590/CsaV3_3G047910/CsaV3_3G006470/CsaV3_4G025330/CsaV3_3G009850/CsaV3_5G032410/CsaV3_1G043310/CsaV3_6G049200/CsaV3_7G029580/CsaV3_2G008080	CsaV3_7G026200/CsaV3_5G035910/CsaV3_7G031000/CsaV3_4G025320/CsaV3_6G040000/CsaV3_4G024600/CsaV3_1G007900/CsaV3_1G009130/CsaV3_5G031360/CsaV3_3G021110/CsaV3_7G029590/CsaV3_3G047910/CsaV3_3G006470/CsaV3_4G025330/CsaV3_3G009850/CsaV3_5G032410/CsaV3_1G043310/CsaV3_6G049200/CsaV3_7G029580/CsaV3_2G008080	csv:101221055/csv:101205739/csv:101207566/csv:101203731/csv:101203012/csv:101219724/csv:101218812/csv:101209736/csv:101212122/csv:101220298/csv:101205321/csv:101205879/csv:101207212/csv:101209936/csv:101217635/csv:101206497/csv:101219793/csv:101216377/csv:101205557/csv:101209640	20	13	CsaV3_7G026200/CsaV3_5G035910/CsaV3_4G025320/CsaV3_6G040000/CsaV3_4G024600/CsaV3_1G007900/CsaV3_1G009130/CsaV3_3G021110/CsaV3_7G029590/CsaV3_3G047910/CsaV3_4G025330/CsaV3_6G049200/CsaV3_7G029580	7	CsaV3_7G031000/CsaV3_5G031360/CsaV3_3G006470/CsaV3_3G009850/CsaV3_5G032410/CsaV3_1G043310/CsaV3_2G008080
csv00280	Valine, leucine and isoleucine degradation	12/880	47/4182	0.273726	0.964048	CsaV3_2G001870/CsaV3_3G040810/CsaV3_6G044860/CsaV3_3G014830/CsaV3_7G002460/CsaV3_7G027810/CsaV3_6G041570/CsaV3_2G025820/CsaV3_3G011240/CsaV3_1G041530/CsaV3_3G033240/CsaV3_4G028150	CsaV3_2G001870/CsaV3_3G040810/CsaV3_6G044860/CsaV3_3G014830/CsaV3_7G002460/CsaV3_7G027810/CsaV3_6G041570/CsaV3_2G025820/CsaV3_3G011240/CsaV3_1G041530/CsaV3_3G033240/CsaV3_4G028150	csv:101217826/csv:101207316/csv:101207178/csv:101206829/csv:101214645/csv:101221786/csv:101205130/csv:101214004/csv:101217710/csv:101216174/csv:101203709/csv:101219329	12	3	CsaV3_2G001870/CsaV3_7G002460/CsaV3_3G033240	9	CsaV3_3G040810/CsaV3_6G044860/CsaV3_3G014830/CsaV3_7G027810/CsaV3_6G041570/CsaV3_2G025820/CsaV3_3G011240/CsaV3_1G041530/CsaV3_4G028150
csv00561	Glycerolipid metabolism	16/880	65/4182	0.281536	0.964048	CsaV3_5G006640/CsaV3_4G027880/CsaV3_3G005860/CsaV3_4G025320/CsaV3_6G001960/CsaV3_3G015560/CsaV3_1G007380/CsaV3_5G029180/CsaV3_7G001740/CsaV3_4G024550/CsaV3_4G025330/CsaV3_5G039220/CsaV3_2G008470/CsaV3_3G048840/CsaV3_7G032210/CsaV3_4G028150	CsaV3_5G006640/CsaV3_4G027880/CsaV3_3G005860/CsaV3_4G025320/CsaV3_6G001960/CsaV3_3G015560/CsaV3_1G007380/CsaV3_5G029180/CsaV3_7G001740/CsaV3_4G024550/CsaV3_4G025330/CsaV3_5G039220/CsaV3_2G008470/CsaV3_3G048840/CsaV3_7G032210/CsaV3_4G028150	csv:101204152/csv:101220288/csv:101208743/csv:101203731/csv:101221986/csv:101205287/csv:101210503/csv:101212167/csv:101211796/csv:101210022/csv:101209936/csv:101215754/csv:101204879/csv:101213494/csv:101210335/csv:101219329	16	7	CsaV3_5G006640/CsaV3_4G025320/CsaV3_3G015560/CsaV3_5G029180/CsaV3_7G001740/CsaV3_4G025330/CsaV3_5G039220	9	CsaV3_4G027880/CsaV3_3G005860/CsaV3_6G001960/CsaV3_1G007380/CsaV3_4G024550/CsaV3_2G008470/CsaV3_3G048840/CsaV3_7G032210/CsaV3_4G028150
csv00592	alpha-Linolenic acid metabolism	15/880	61/4182	0.291978	0.969851	CsaV3_4G027880/CsaV3_2G010330/CsaV3_3G042140/CsaV3_7G024950/CsaV3_3G042130/CsaV3_7G010160/CsaV3_7G006670/novel.506/CsaV3_3G011240/CsaV3_UNG137080/CsaV3_3G000680/CsaV3_2G028330/CsaV3_7G024990/CsaV3_7G010170/CsaV3_5G017240	CsaV3_4G027880/CsaV3_2G010330/CsaV3_3G042140/CsaV3_7G024950/CsaV3_3G042130/CsaV3_7G010160/CsaV3_7G006670/-/CsaV3_3G011240/CsaV3_UNG137080/CsaV3_3G000680/CsaV3_2G028330/CsaV3_7G024990/CsaV3_7G010170/CsaV3_5G017240	csv:101220288/csv:101218290/csv:101218397/csv:101209854/csv:101206631/csv:101211324/csv:101218965/csv:101214880/csv:101217710/csv:101218159/csv:101211109/csv:101221732/csv:101206036/csv:101211574/csv:101209722	15	9	CsaV3_3G042140/CsaV3_7G024950/CsaV3_3G042130/CsaV3_7G010160/CsaV3_7G006670/novel.506/CsaV3_UNG137080/CsaV3_7G024990/CsaV3_7G010170	6	CsaV3_4G027880/CsaV3_2G010330/CsaV3_3G011240/CsaV3_3G000680/CsaV3_2G028330/CsaV3_5G017240
csv00052	Galactose metabolism	12/880	48/4182	0.300396	0.969851	CsaV3_5G028300/CsaV3_6G048080/CsaV3_3G023460/CsaV3_5G029180/CsaV3_3G021110/CsaV3_3G043840/CsaV3_3G045830/CsaV3_4G004200/CsaV3_5G001840/CsaV3_2G001890/CsaV3_1G015730/CsaV3_4G008960	CsaV3_5G028300/CsaV3_6G048080/CsaV3_3G023460/CsaV3_5G029180/CsaV3_3G021110/CsaV3_3G043840/CsaV3_3G045830/CsaV3_4G004200/CsaV3_5G001840/CsaV3_2G001890/CsaV3_1G015730/CsaV3_4G008960	csv:101218883/csv:101211230/csv:101220704/csv:101212167/csv:101220298/csv:101204972/csv:101216058/csv:101204973/csv:101205820/csv:101218300/csv:101215109/csv:101219465	12	7	CsaV3_5G028300/CsaV3_5G029180/CsaV3_3G021110/CsaV3_3G045830/CsaV3_5G001840/CsaV3_2G001890/CsaV3_1G015730	5	CsaV3_6G048080/CsaV3_3G023460/CsaV3_3G043840/CsaV3_4G004200/CsaV3_4G008960
csv00062	Fatty acid elongation	6/880	22/4182	0.310106	0.973388	CsaV3_5G004490/CsaV3_3G002510/CsaV3_5G034300/CsaV3_3G016490/CsaV3_5G030680/CsaV3_1G033910	CsaV3_5G004490/CsaV3_3G002510/CsaV3_5G034300/CsaV3_3G016490/CsaV3_5G030680/CsaV3_1G033910	csv:101222043/csv:101212007/csv:101218433/csv:101215310/csv:101206427/csv:101209161	6	3	CsaV3_5G004490/CsaV3_5G030680/CsaV3_1G033910	3	CsaV3_3G002510/CsaV3_5G034300/CsaV3_3G016490
csv04141	Protein processing in endoplasmic reticulum	37/880	166/4182	0.374309	0.999603	CsaV3_2G028400/CsaV3_2G009170/CsaV3_3G027480/CsaV3_4G033770/CsaV3_7G024760/CsaV3_6G050110/CsaV3_2G006990/CsaV3_5G001960/CsaV3_1G012230/CsaV3_5G008690/CsaV3_7G008210/CsaV3_5G008760/CsaV3_3G017490/CsaV3_6G003940/CsaV3_6G051910/CsaV3_3G017480/CsaV3_4G001560/CsaV3_5G026520/CsaV3_3G007400/CsaV3_6G015540/CsaV3_6G006480/CsaV3_6G034330/CsaV3_1G009950/CsaV3_1G044020/CsaV3_5G028000/CsaV3_2G029630/CsaV3_5G0…	CsaV3_2G028400/CsaV3_2G009170/CsaV3_3G027480/CsaV3_4G033770/CsaV3_7G024760/CsaV3_6G050110/CsaV3_2G006990/CsaV3_5G001960/CsaV3_1G012230/CsaV3_5G008690/CsaV3_7G008210/CsaV3_5G008760/CsaV3_3G017490/CsaV3_6G003940/CsaV3_6G051910/CsaV3_3G017480/CsaV3_4G001560/CsaV3_5G026520/CsaV3_3G007400/CsaV3_6G015540/CsaV3_6G006480/CsaV3_6G034330/CsaV3_1G009950/CsaV3_1G044020/CsaV3_5G028000/CsaV3_2G029630/CsaV3_5G0…	csv:101221027/csv:101215564/csv:101210531/csv:101206686/csv:101212307/csv:101205406/csv:101205515/csv:101207505/csv:101208731/csv:101217071/csv:101220889/csv:101211939/csv:101210914/csv:101207000/csv:101218356/csv:101210914/csv:101210969/csv:101211905/csv:101220008/csv:101221066/csv:101211017/csv:101216516/csv:101207554/csv:101205422/csv:101209321/csv:101203607/csv:101208128/csv:101203114/csv:101…	37	15	CsaV3_6G050110/CsaV3_2G006990/CsaV3_5G001960/CsaV3_3G017490/CsaV3_6G051910/CsaV3_3G007400/CsaV3_6G015540/CsaV3_6G006480/CsaV3_6G034330/CsaV3_1G009950/CsaV3_2G029630/CsaV3_4G002420/CsaV3_2G024370/CsaV3_7G029820/CsaV3_5G000130	22	CsaV3_2G028400/CsaV3_2G009170/CsaV3_3G027480/CsaV3_4G033770/CsaV3_7G024760/CsaV3_1G012230/CsaV3_5G008690/CsaV3_7G008210/CsaV3_5G008760/CsaV3_6G003940/CsaV3_3G017480/CsaV3_4G001560/CsaV3_5G026520/CsaV3_1G044020/CsaV3_5G028000/CsaV3_5G030610/CsaV3_3G034210/CsaV3_3G041900/CsaV3_5G008780/CsaV3_3G034390/CsaV3_1G035820/CsaV3_5G018740
csv00790	Folate biosynthesis	6/880	24/4182	0.393055	0.999603	CsaV3_3G021950/CsaV3_6G051460/CsaV3_5G037300/CsaV3_6G013680/CsaV3_4G033410/CsaV3_6G003290	CsaV3_3G021950/CsaV3_6G051460/CsaV3_5G037300/CsaV3_6G013680/CsaV3_4G033410/CsaV3_6G003290	csv:101208344/csv:101207464/csv:101209617/csv:101220625/csv:101212163/csv:101212510	6	2	CsaV3_6G051460/CsaV3_4G033410	4	CsaV3_3G021950/CsaV3_5G037300/CsaV3_6G013680/CsaV3_6G003290
csv00511	Other glycan degradation	4/880	16/4182	0.443596	0.999603	CsaV3_5G039980/CsaV3_5G014080/CsaV3_3G043840/CsaV3_5G006710	CsaV3_5G039980/CsaV3_5G014080/CsaV3_3G043840/CsaV3_5G006710	csv:101204709/csv:101212019/csv:101204972/csv:101202942	4	1	CsaV3_5G006710	3	CsaV3_5G039980/CsaV3_5G014080/CsaV3_3G043840
csv04144	Endocytosis	32/880	147/4182	0.446264	0.999603	CsaV3_2G016000/CsaV3_2G009170/CsaV3_6G013060/CsaV3_3G031710/CsaV3_7G024760/CsaV3_UNG052420/CsaV3_7G034960/CsaV3_4G003850/CsaV3_1G040130/CsaV3_1G033100/CsaV3_5G026520/CsaV3_1G037330/CsaV3_5G015210/CsaV3_2G024640/CsaV3_6G003390/CsaV3_3G035110/CsaV3_3G042530/CsaV3_7G030260/CsaV3_5G039590/CsaV3_7G033340/CsaV3_3G044370/CsaV3_3G011790/CsaV3_6G052350/CsaV3_3G006490/CsaV3_6G005980/CsaV3_7G008250/CsaV3_7G…	CsaV3_2G016000/CsaV3_2G009170/CsaV3_6G013060/CsaV3_3G031710/CsaV3_7G024760/CsaV3_UNG052420/CsaV3_7G034960/CsaV3_4G003850/CsaV3_1G040130/CsaV3_1G033100/CsaV3_5G026520/CsaV3_1G037330/CsaV3_5G015210/CsaV3_2G024640/CsaV3_6G003390/CsaV3_3G035110/CsaV3_3G042530/CsaV3_7G030260/CsaV3_5G039590/CsaV3_7G033340/CsaV3_3G044370/CsaV3_3G011790/CsaV3_6G052350/CsaV3_3G006490/CsaV3_6G005980/CsaV3_7G008250/CsaV3_7G…	csv:101218079/csv:101215564/csv:101206370/csv:101207938/csv:101212307/csv:101217093/csv:101216409/csv:101205627/csv:101217093/csv:101203665/csv:101211905/csv:101211569/csv:101221303/csv:101211832/csv:101211044/csv:101207159/csv:105435011/csv:101217563/csv:101220753/csv:101221144/csv:101214277/csv:101204911/csv:101218116/csv:101207947/csv:101218942/csv:101217017/csv:101208671/csv:101212793/csv:101…	32	11	CsaV3_3G031710/CsaV3_7G034960/CsaV3_4G003850/CsaV3_1G037330/CsaV3_2G024640/CsaV3_3G035110/CsaV3_3G042530/CsaV3_7G030260/CsaV3_3G006490/CsaV3_7G033070/CsaV3_6G043530	21	CsaV3_2G016000/CsaV3_2G009170/CsaV3_6G013060/CsaV3_7G024760/CsaV3_UNG052420/CsaV3_1G040130/CsaV3_1G033100/CsaV3_5G026520/CsaV3_5G015210/CsaV3_6G003390/CsaV3_5G039590/CsaV3_7G033340/CsaV3_3G044370/CsaV3_3G011790/CsaV3_6G052350/CsaV3_6G005980/CsaV3_7G008250/CsaV3_6G022720/CsaV3_5G036680/CsaV3_6G049840/CsaV3_6G052700
csv00910	Nitrogen metabolism	7/880	30/4182	0.449405	0.999603	CsaV3_7G030560/CsaV3_2G030320/CsaV3_6G043980/CsaV3_3G011860/CsaV3_5G031570/CsaV3_6G039990/CsaV3_3G040230	CsaV3_7G030560/CsaV3_2G030320/CsaV3_6G043980/CsaV3_3G011860/CsaV3_5G031570/CsaV3_6G039990/CsaV3_3G040230	csv:101213413/csv:101212995/csv:101206142/csv:101205401/csv:101215090/csv:101202774/csv:101214380	7	3	CsaV3_7G030560/CsaV3_3G011860/CsaV3_3G040230	4	CsaV3_2G030320/CsaV3_6G043980/CsaV3_5G031570/CsaV3_6G039990
csv00220	Arginine biosynthesis	8/880	35/4182	0.461689	0.999603	CsaV3_2G030250/CsaV3_1G001680/CsaV3_7G030560/CsaV3_3G031010/CsaV3_5G031220/CsaV3_2G024880/CsaV3_2G031570/CsaV3_6G044190	CsaV3_2G030250/CsaV3_1G001680/CsaV3_7G030560/CsaV3_3G031010/CsaV3_5G031220/CsaV3_2G024880/CsaV3_2G031570/CsaV3_6G044190	csv:101213711/csv:101213747/csv:101213413/csv:101207254/csv:101220645/csv:101207914/csv:101203871/csv:101223180	8	8	CsaV3_2G030250/CsaV3_1G001680/CsaV3_7G030560/CsaV3_3G031010/CsaV3_5G031220/CsaV3_2G024880/CsaV3_2G031570/CsaV3_6G044190	0
csv03022	Basal transcription factors	8/880	35/4182	0.461689	0.999603	CsaV3_7G003000/CsaV3_4G027560/CsaV3_4G028940/CsaV3_1G006480/CsaV3_7G026510/CsaV3_1G041520/CsaV3_7G010010/CsaV3_7G028200	CsaV3_7G003000/CsaV3_4G027560/CsaV3_4G028940/CsaV3_1G006480/CsaV3_7G026510/CsaV3_1G041520/CsaV3_7G010010/CsaV3_7G028200	csv:101208326/csv:101203811/csv:101209725/csv:101210662/csv:101212178/csv:101216807/csv:101206619/csv:101205132	8	1	CsaV3_7G003000	7	CsaV3_4G027560/CsaV3_4G028940/CsaV3_1G006480/CsaV3_7G026510/CsaV3_1G041520/CsaV3_7G010010/CsaV3_7G028200
csv04933	AGE-RAGE signaling pathway in diabetic complications	3/880	833820	0.478446	0.999603	CsaV3_5G010130/CsaV3_1G012740/CsaV3_1G045750	CsaV3_5G010130/CsaV3_1G012740/CsaV3_1G045750	csv:101212421/csv:101218403/csv:101208639	3	1	CsaV3_5G010130	2	CsaV3_1G012740/CsaV3_1G045750
csv00270	Cysteine and methionine metabolism	22/880	102/4182	0.487349	0.999603	CsaV3_6G048630/CsaV3_7G027790/CsaV3_3G018170/CsaV3_7G018620/CsaV3_6G000890/CsaV3_2G001540/CsaV3_5G031670/CsaV3_7G032920/CsaV3_6G000650/CsaV3_4G008360/CsaV3_3G000370/CsaV3_1G041720/CsaV3_3G020560/CsaV3_5G000580/CsaV3_6G044400/CsaV3_2G011670/CsaV3_2G025820/CsaV3_3G020550/CsaV3_3G033240/CsaV3_3G010720/CsaV3_UNG227830/CsaV3_2G006550	CsaV3_6G048630/CsaV3_7G027790/CsaV3_3G018170/CsaV3_7G018620/CsaV3_6G000890/CsaV3_2G001540/CsaV3_5G031670/CsaV3_7G032920/CsaV3_6G000650/CsaV3_4G008360/CsaV3_3G000370/CsaV3_1G041720/CsaV3_3G020560/CsaV3_5G000580/CsaV3_6G044400/CsaV3_2G011670/CsaV3_2G025820/CsaV3_3G020550/CsaV3_3G033240/CsaV3_3G010720/CsaV3_UNG227830/CsaV3_2G006550	csv:101204103/csv:101221323/csv:101222633/csv:101213467/csv:101211475/csv:101203726/csv:101213410/csv:101221824/csv:101220896/csv:101207078/csv:101202934/csv:101218702/csv:101207514/csv:101222254/csv:101216963/csv:101215667/csv:101214004/csv:101207514/csv:101203709/csv:101209658/csv:101219910/csv:101211600	22	17	CsaV3_6G048630/CsaV3_3G018170/CsaV3_2G001540/CsaV3_5G031670/CsaV3_7G032920/CsaV3_6G000650/CsaV3_4G008360/CsaV3_3G000370/CsaV3_1G041720/CsaV3_3G020560/CsaV3_5G000580/CsaV3_6G044400/CsaV3_2G011670/CsaV3_3G020550/CsaV3_3G033240/CsaV3_3G010720/CsaV3_UNG227830	5	CsaV3_7G027790/CsaV3_7G018620/CsaV3_6G000890/CsaV3_2G025820/CsaV3_2G006550
csv04016	MAPK signaling pathway - plant	27/880	126/4182	0.49313	0.999603	CsaV3_3G012170/CsaV3_6G031490/CsaV3_3G001710/CsaV3_1G033530/CsaV3_3G015240/CsaV3_6G000890/CsaV3_2G034810/CsaV3_6G051540/CsaV3_1G004720/CsaV3_7G026460/CsaV3_3G016530/CsaV3_4G035580/CsaV3_7G007580/CsaV3_1G034580/CsaV3_3G008140/CsaV3_3G007170/CsaV3_6G047760/CsaV3_4G030060/CsaV3_3G042770/CsaV3_6G045260/CsaV3_1G041870/CsaV3_2G002930/CsaV3_1G033200/CsaV3_2G004370/CsaV3_4G023180/CsaV3_5G023410/CsaV3_3G0…	CsaV3_3G012170/CsaV3_6G031490/CsaV3_3G001710/CsaV3_1G033530/CsaV3_3G015240/CsaV3_6G000890/CsaV3_2G034810/CsaV3_6G051540/CsaV3_1G004720/CsaV3_7G026460/CsaV3_3G016530/CsaV3_4G035580/CsaV3_7G007580/CsaV3_1G034580/CsaV3_3G008140/CsaV3_3G007170/CsaV3_6G047760/CsaV3_4G030060/CsaV3_3G042770/CsaV3_6G045260/CsaV3_1G041870/CsaV3_2G002930/CsaV3_1G033200/CsaV3_2G004370/CsaV3_4G023180/CsaV3_5G023410/CsaV3_3G0…	csv:101210326/csv:101216662/csv:101205372/csv:101202796/csv:101212685/csv:101211475/csv:101208274/csv:101215973/csv:101207158/csv:101223223/csv:101206634/csv:101207734/csv:101211323/csv:101206871/csv:101211059/csv:101217169/csv:101216853/csv:101209540/csv:101217978/csv:101206218/csv:101203816/csv:101220113/csv:101208746/csv:101218843/csv:101219809/csv:101218538/csv:101220325	27	10	CsaV3_6G031490/CsaV3_3G015240/CsaV3_4G035580/CsaV3_7G007580/CsaV3_3G007170/CsaV3_6G047760/CsaV3_1G041870/CsaV3_1G033200/CsaV3_4G023180/CsaV3_3G022370	17	CsaV3_3G012170/CsaV3_3G001710/CsaV3_1G033530/CsaV3_6G000890/CsaV3_2G034810/CsaV3_6G051540/CsaV3_1G004720/CsaV3_7G026460/CsaV3_3G016530/CsaV3_1G034580/CsaV3_3G008140/CsaV3_4G030060/CsaV3_3G042770/CsaV3_6G045260/CsaV3_2G002930/CsaV3_2G004370/CsaV3_5G023410
csv00340	Histidine metabolism	4/880	17/4182	0.4946	0.999603	CsaV3_4G032220/CsaV3_1G019630/CsaV3_7G021940/CsaV3_4G028150	CsaV3_4G032220/CsaV3_1G019630/CsaV3_7G021940/CsaV3_4G028150	csv:101207614/csv:101204289/csv:101205184/csv:101219329	4	1	CsaV3_1G019630	3	CsaV3_4G032220/CsaV3_7G021940/CsaV3_4G028150
csv00310	Lysine degradation	6/880	27/4182	0.515778	0.999603	CsaV3_5G023260/CsaV3_1G041440/CsaV3_6G002600/CsaV3_6G047220/CsaV3_7G002460/CsaV3_4G028150	CsaV3_5G023260/CsaV3_1G041440/CsaV3_6G002600/CsaV3_6G047220/CsaV3_7G002460/CsaV3_4G028150	csv:101220194/csv:101214976/csv:101212299/csv:101222055/csv:101214645/csv:101219329	6	2	CsaV3_5G023260/CsaV3_7G002460	4	CsaV3_1G041440/CsaV3_6G002600/CsaV3_6G047220/CsaV3_4G028150
csv03420	Nucleotide excision repair	11/880	51/4182	0.518776	0.999603	CsaV3_3G005500/CsaV3_6G016240/CsaV3_3G037350/CsaV3_6G046400/CsaV3_4G027560/CsaV3_3G022110/CsaV3_5G024160/CsaV3_3G042180/CsaV3_1G037020/CsaV3_3G041900/CsaV3_7G028200	CsaV3_3G005500/CsaV3_6G016240/CsaV3_3G037350/CsaV3_6G046400/CsaV3_4G027560/CsaV3_3G022110/CsaV3_5G024160/CsaV3_3G042180/CsaV3_1G037020/CsaV3_3G041900/CsaV3_7G028200	csv:101209897/csv:101212319/csv:101203835/csv:101218071/csv:101203811/csv:101222280/csv:101208462/csv:101216163/csv:101208613/csv:101221403/csv:101205132	11	1	CsaV3_3G037350	10	CsaV3_3G005500/CsaV3_6G016240/CsaV3_6G046400/CsaV3_4G027560/CsaV3_3G022110/CsaV3_5G024160/CsaV3_3G042180/CsaV3_1G037020/CsaV3_3G041900/CsaV3_7G028200
csv03430	Mismatch repair	7/880	32/4182	0.523685	0.999603	CsaV3_1G032850/CsaV3_3G037350/CsaV3_7G029930/CsaV3_6G046400/CsaV3_1G007030/CsaV3_7G029150/CsaV3_6G002720	CsaV3_1G032850/CsaV3_3G037350/CsaV3_7G029930/CsaV3_6G046400/CsaV3_1G007030/CsaV3_7G029150/CsaV3_6G002720	csv:101214177/csv:101203835/csv:101219303/csv:101218071/csv:101208542/csv:101210654/csv:101211816	7	2	CsaV3_1G032850/CsaV3_3G037350	5	CsaV3_7G029930/CsaV3_6G046400/CsaV3_1G007030/CsaV3_7G029150/CsaV3_6G002720
csv00563	Glycosylphosphatidylinositol (GPI)-anchor biosynthesis	4/880	18/4182	0.543506	0.999603	CsaV3_1G037410/CsaV3_3G001560/CsaV3_3G001440/CsaV3_4G022060	CsaV3_1G037410/CsaV3_3G001560/CsaV3_3G001440/CsaV3_4G022060	csv:101216463/csv:101206318/csv:101208659/csv:101216602	4	1	CsaV3_3G001440	3	CsaV3_1G037410/CsaV3_3G001560/CsaV3_4G022060
csv00330	Arginine and proline metabolism	12/880	57/4182	0.552123	0.999603	CsaV3_5G031670/CsaV3_1G007880/CsaV3_5G037760/CsaV3_3G020560/CsaV3_5G000580/CsaV3_4G027860/CsaV3_2G015800/CsaV3_6G001400/CsaV3_3G020550/CsaV3_1G039020/CsaV3_2G001470/CsaV3_4G028150	CsaV3_5G031670/CsaV3_1G007880/CsaV3_5G037760/CsaV3_3G020560/CsaV3_5G000580/CsaV3_4G027860/CsaV3_2G015800/CsaV3_6G001400/CsaV3_3G020550/CsaV3_1G039020/CsaV3_2G001470/CsaV3_4G028150	csv:101213410/csv:101214440/csv:101210382/csv:101207514/csv:101222254/csv:101203976/csv:101214819/csv:101210588/csv:101207514/csv:101209171/csv:101205432/csv:101219329	12	10	CsaV3_5G031670/CsaV3_5G037760/CsaV3_3G020560/CsaV3_5G000580/CsaV3_4G027860/CsaV3_2G015800/CsaV3_6G001400/CsaV3_3G020550/CsaV3_1G039020/CsaV3_2G001470	2	CsaV3_1G007880/CsaV3_4G028150
csv00380	Tryptophan metabolism	8/880	38/4182	0.563773	0.999603	CsaV3_6G031490/CsaV3_2G031080/CsaV3_7G032920/CsaV3_1G001250/CsaV3_7G002460/CsaV3_2G015800/CsaV3_1G039020/CsaV3_4G028150	CsaV3_6G031490/CsaV3_2G031080/CsaV3_7G032920/CsaV3_1G001250/CsaV3_7G002460/CsaV3_2G015800/CsaV3_1G039020/CsaV3_4G028150	csv:101216662/csv:101203913/csv:101221824/csv:101206363/csv:101214645/csv:101214819/csv:101209171/csv:101219329	8	7	CsaV3_6G031490/CsaV3_2G031080/CsaV3_7G032920/CsaV3_1G001250/CsaV3_7G002460/CsaV3_2G015800/CsaV3_1G039020	1	CsaV3_4G028150
csv03050	Proteasome	10/880	48/4182	0.571695	0.999603	CsaV3_3G003990/CsaV3_4G032560/CsaV3_6G031560/CsaV3_6G013170/CsaV3_6G047290/CsaV3_3G028620/CsaV3_4G006830/CsaV3_6G032330/CsaV3_3G009670/CsaV3_7G003090	CsaV3_3G003990/CsaV3_4G032560/CsaV3_6G031560/CsaV3_6G013170/CsaV3_6G047290/CsaV3_3G028620/CsaV3_4G006830/CsaV3_6G032330/CsaV3_3G009670/CsaV3_7G003090	csv:101205528/csv:101221238/csv:101214977/csv:101221619/csv:101221038/csv:101206724/csv:101207684/csv:101205512/csv:101213159/csv:101206940	10	10	CsaV3_3G003990/CsaV3_4G032560/CsaV3_6G031560/CsaV3_6G013170/CsaV3_6G047290/CsaV3_3G028620/CsaV3_4G006830/CsaV3_6G032330/CsaV3_3G009670/CsaV3_7G003090	0
csv04145	Phagosome	13/880	63/4182	0.58213	0.999603	CsaV3_2G029310/CsaV3_2G006990/CsaV3_7G033710/CsaV3_3G007400/CsaV3_3G046610/CsaV3_3G041630/CsaV3_3G010990/CsaV3_7G033340/CsaV3_1G009950/CsaV3_4G002420/CsaV3_2G029320/CsaV3_7G021690/CsaV3_1G045750	CsaV3_2G029310/CsaV3_2G006990/CsaV3_7G033710/CsaV3_3G007400/CsaV3_3G046610/CsaV3_3G041630/CsaV3_3G010990/CsaV3_7G033340/CsaV3_1G009950/CsaV3_4G002420/CsaV3_2G029320/CsaV3_7G021690/CsaV3_1G045750	csv:101209079/csv:101205515/csv:101216234/csv:101220008/csv:101205012/csv:101203260/csv:101213721/csv:101221144/csv:101207554/csv:101203114/csv:101209079/csv:101202759/csv:101208639	13	10	CsaV3_2G029310/CsaV3_2G006990/CsaV3_7G033710/CsaV3_3G007400/CsaV3_3G046610/CsaV3_3G041630/CsaV3_3G010990/CsaV3_1G009950/CsaV3_4G002420/CsaV3_2G029320	3	CsaV3_7G033340/CsaV3_7G021690/CsaV3_1G045750
csv04120	Ubiquitin mediated proteolysis	20/880	98/4182	0.602387	0.999603	novel.877/CsaV3_2G007660/CsaV3_6G016240/CsaV3_6G050140/CsaV3_3G011750/CsaV3_5G036390/CsaV3_6G028570/CsaV3_7G024700/CsaV3_1G045940/CsaV3_3G019900/novel.793/CsaV3_3G013600/CsaV3_6G021240/CsaV3_4G008040/CsaV3_2G024370/CsaV3_6G007200/CsaV3_1G037020/CsaV3_3G035510/CsaV3_4G008470/CsaV3_7G023260	-/CsaV3_2G007660/CsaV3_6G016240/CsaV3_6G050140/CsaV3_3G011750/CsaV3_5G036390/CsaV3_6G028570/CsaV3_7G024700/CsaV3_1G045940/CsaV3_3G019900/-/CsaV3_3G013600/CsaV3_6G021240/CsaV3_4G008040/CsaV3_2G024370/CsaV3_6G007200/CsaV3_1G037020/CsaV3_3G035510/CsaV3_4G008470/CsaV3_7G023260	csv:101218340/csv:101217288/csv:101212319/csv:101204759/csv:101204424/csv:101207006/csv:101221014/csv:105436141/csv:101203654/csv:105434867/csv:101218340/csv:101209336/csv:101218340/csv:101212453/csv:101217906/csv:101209363/csv:101208613/csv:101211492/csv:101205082/csv:101214340	20	8	CsaV3_2G007660/CsaV3_6G028570/CsaV3_3G013600/CsaV3_4G008040/CsaV3_2G024370/CsaV3_6G007200/CsaV3_4G008470/CsaV3_7G023260	12	novel.877/CsaV3_6G016240/CsaV3_6G050140/CsaV3_3G011750/CsaV3_5G036390/CsaV3_7G024700/CsaV3_1G045940/CsaV3_3G019900/novel.793/CsaV3_6G021240/CsaV3_1G037020/CsaV3_3G035510
csv04070	Phosphatidylinositol signaling system	11/880	56/4182	0.654346	0.999603	CsaV3_3G005860/CsaV3_3G015240/CsaV3_5G037850/CsaV3_2G036580/CsaV3_5G010130/CsaV3_6G041660/CsaV3_2G032910/CsaV3_1G017100/CsaV3_7G021690/CsaV3_1G041870/CsaV3_4G023180	CsaV3_3G005860/CsaV3_3G015240/CsaV3_5G037850/CsaV3_2G036580/CsaV3_5G010130/CsaV3_6G041660/CsaV3_2G032910/CsaV3_1G017100/CsaV3_7G021690/CsaV3_1G041870/CsaV3_4G023180	csv:101208743/csv:101212685/csv:101210866/csv:101223134/csv:101212421/csv:101203177/csv:101204839/csv:101217972/csv:101202759/csv:101203816/csv:101219809	11	5	CsaV3_3G015240/CsaV3_2G036580/CsaV3_5G010130/CsaV3_1G041870/CsaV3_4G023180	6	CsaV3_3G005860/CsaV3_5G037850/CsaV3_6G041660/CsaV3_2G032910/CsaV3_1G017100/CsaV3_7G021690
csv00562	Inositol phosphate metabolism	13/880	66/4182	0.654743	0.999603	CsaV3_4G031770/CsaV3_6G044860/CsaV3_2G036580/CsaV3_7G034090/CsaV3_4G004810/CsaV3_5G010130/CsaV3_2G015690/CsaV3_6G041660/CsaV3_2G032910/CsaV3_1G017100/CsaV3_5G010390/CsaV3_7G021690/CsaV3_7G034100	CsaV3_4G031770/CsaV3_6G044860/CsaV3_2G036580/CsaV3_7G034090/CsaV3_4G004810/CsaV3_5G010130/CsaV3_2G015690/CsaV3_6G041660/CsaV3_2G032910/CsaV3_1G017100/CsaV3_5G010390/CsaV3_7G021690/CsaV3_7G034100	csv:101218311/csv:101207178/csv:101223134/csv:101209934/csv:101207441/csv:101212421/csv:101213372/csv:101203177/csv:101204839/csv:101217972/csv:101221482/csv:101202759/csv:101213518	13	6	CsaV3_4G031770/CsaV3_2G036580/CsaV3_4G004810/CsaV3_5G010130/CsaV3_2G015690/CsaV3_5G010390	7	CsaV3_6G044860/CsaV3_7G034090/CsaV3_6G041660/CsaV3_2G032910/CsaV3_1G017100/CsaV3_7G021690/CsaV3_7G034100
csv00620	Pyruvate metabolism	17/880	87/4182	0.677485	0.999603	CsaV3_2G013320/CsaV3_6G040340/CsaV3_1G032330/CsaV3_5G028880/CsaV3_4G008360/CsaV3_1G013530/CsaV3_4G017590/CsaV3_7G002460/CsaV3_1G009520/CsaV3_3G020130/CsaV3_5G034210/CsaV3_3G021780/CsaV3_6G007900/CsaV3_5G021900/CsaV3_4G008750/CsaV3_UNG009100/CsaV3_4G028150	CsaV3_2G013320/CsaV3_6G040340/CsaV3_1G032330/CsaV3_5G028880/CsaV3_4G008360/CsaV3_1G013530/CsaV3_4G017590/CsaV3_7G002460/CsaV3_1G009520/CsaV3_3G020130/CsaV3_5G034210/CsaV3_3G021780/CsaV3_6G007900/CsaV3_5G021900/CsaV3_4G008750/CsaV3_UNG009100/CsaV3_4G028150	csv:101218017/csv:101207102/csv:101204247/csv:101216256/csv:101207078/csv:101220380/csv:101216029/csv:101214645/csv:101214523/csv:101203579/csv:101220730/csv:101206887/csv:101220981/csv:101222352/csv:101222930/csv:101212275/csv:101219329	17	14	CsaV3_2G013320/CsaV3_6G040340/CsaV3_1G032330/CsaV3_5G028880/CsaV3_4G008360/CsaV3_1G013530/CsaV3_4G017590/CsaV3_7G002460/CsaV3_3G020130/CsaV3_5G034210/CsaV3_3G021780/CsaV3_6G007900/CsaV3_4G008750/CsaV3_UNG009100	3	CsaV3_1G009520/CsaV3_5G021900/CsaV3_4G028150
csv00071	Fatty acid degradation	10/880	52/4182	0.680106	0.999603	CsaV3_6G007280/CsaV3_7G024950/CsaV3_5G026420/CsaV3_1G036060/CsaV3_7G002460/CsaV3_3G011240/CsaV3_UNG137080/CsaV3_6G001070/CsaV3_7G024990/CsaV3_4G028150	CsaV3_6G007280/CsaV3_7G024950/CsaV3_5G026420/CsaV3_1G036060/CsaV3_7G002460/CsaV3_3G011240/CsaV3_UNG137080/CsaV3_6G001070/CsaV3_7G024990/CsaV3_4G028150	csv:101208145/csv:101209854/csv:101209864/csv:101214516/csv:101214645/csv:101217710/csv:101218159/csv:101212704/csv:101206036/csv:101219329	10	7	CsaV3_6G007280/CsaV3_7G024950/CsaV3_5G026420/CsaV3_1G036060/CsaV3_7G002460/CsaV3_UNG137080/CsaV3_7G024990	3	CsaV3_3G011240/CsaV3_6G001070/CsaV3_4G028150
csv00410	beta-Alanine metabolism	8/880	42/4182	0.6846	0.999603	CsaV3_6G036910/CsaV3_6G044860/CsaV3_7G022600/CsaV3_UNG137080/CsaV3_6G038140/CsaV3_2G001470/CsaV3_1G005000/CsaV3_4G028150	CsaV3_6G036910/CsaV3_6G044860/CsaV3_7G022600/CsaV3_UNG137080/CsaV3_6G038140/CsaV3_2G001470/CsaV3_1G005000/CsaV3_4G028150	csv:101220670/csv:101207178/csv:101210998/csv:101218159/csv:101222232/csv:101205432/csv:101210903/csv:101219329	8	4	CsaV3_UNG137080/CsaV3_6G038140/CsaV3_2G001470/CsaV3_1G005000	4	CsaV3_6G036910/CsaV3_6G044860/CsaV3_7G022600/CsaV3_4G028150
csv00909	Sesquiterpenoid and triterpenoid biosynthesis	3/880	16/4182	0.685876	0.999603	CsaV3_3G005760/CsaV3_3G005740/CsaV3_3G003670	CsaV3_3G005760/CsaV3_3G005740/CsaV3_3G003670	csv:101211697/csv:101211540/csv:101202882	3	3	CsaV3_3G005760/CsaV3_3G005740/CsaV3_3G003670	0
csv03018	RNA degradation	18/880	93/4182	0.696653	0.999603	CsaV3_6G038490/CsaV3_6G040390/CsaV3_1G015170/CsaV3_6G048080/CsaV3_3G023460/CsaV3_2G009040/CsaV3_4G033760/CsaV3_4G007450/CsaV3_4G004200/CsaV3_1G001380/CsaV3_7G003430/CsaV3_5G006110/CsaV3_7G005600/CsaV3_7G025500/CsaV3_1G035960/CsaV3_4G011700/CsaV3_3G038040/CsaV3_4G008960	CsaV3_6G038490/CsaV3_6G040390/CsaV3_1G015170/CsaV3_6G048080/CsaV3_3G023460/CsaV3_2G009040/CsaV3_4G033760/CsaV3_4G007450/CsaV3_4G004200/CsaV3_1G001380/CsaV3_7G003430/CsaV3_5G006110/CsaV3_7G005600/CsaV3_7G025500/CsaV3_1G035960/CsaV3_4G011700/CsaV3_3G038040/CsaV3_4G008960	csv:101219801/csv:101208322/csv:101210423/csv:101211230/csv:101220704/csv:101205306/csv:101206043/csv:101213130/csv:101204973/csv:101207820/csv:101222894/csv:101205035/csv:101217887/csv:101205572/csv:101205451/csv:101214102/csv:101208686/csv:101219465	18	3	CsaV3_6G040390/CsaV3_7G003430/CsaV3_7G005600	15	CsaV3_6G038490/CsaV3_1G015170/CsaV3_6G048080/CsaV3_3G023460/CsaV3_2G009040/CsaV3_4G033760/CsaV3_4G007450/CsaV3_4G004200/CsaV3_1G001380/CsaV3_5G006110/CsaV3_7G025500/CsaV3_1G035960/CsaV3_4G011700/CsaV3_3G038040/CsaV3_4G008960
csv04146	Peroxisome	14/880	73/4182	0.698155	0.999603	CsaV3_6G031490/CsaV3_1G039510/CsaV3_3G040810/CsaV3_2G009880/CsaV3_4G010390/CsaV3_3G011240/CsaV3_6G039090/CsaV3_6G037870/CsaV3_1G046740/CsaV3_UNG137080/CsaV3_6G001070/CsaV3_1G042760/CsaV3_2G004490/CsaV3_6G014930	CsaV3_6G031490/CsaV3_1G039510/CsaV3_3G040810/CsaV3_2G009880/CsaV3_4G010390/CsaV3_3G011240/CsaV3_6G039090/CsaV3_6G037870/CsaV3_1G046740/CsaV3_UNG137080/CsaV3_6G001070/CsaV3_1G042760/CsaV3_2G004490/CsaV3_6G014930	csv:101216662/csv:101215417/csv:101207316/csv:101206004/csv:101218890/csv:101217710/csv:101207975/csv:101211500/csv:101216440/csv:101218159/csv:101212704/csv:101211977/csv:101216556/csv:101209050	14	6	CsaV3_6G031490/CsaV3_1G039510/CsaV3_4G010390/CsaV3_6G039090/CsaV3_6G037870/CsaV3_UNG137080	8	CsaV3_3G040810/CsaV3_2G009880/CsaV3_3G011240/CsaV3_1G046740/CsaV3_6G001070/CsaV3_1G042760/CsaV3_2G004490/CsaV3_6G014930
csv00240	Pyrimidine metabolism	9/880	48/4182	0.707432	0.999603	CsaV3_6G053210/novel.495/CsaV3_1G002650/CsaV3_3G011970/CsaV3_3G007170/CsaV3_1G003160/CsaV3_6G040600/CsaV3_7G026770/CsaV3_5G024820	CsaV3_6G053210/-/CsaV3_1G002650/CsaV3_3G011970/CsaV3_3G007170/CsaV3_1G003160/CsaV3_6G040600/CsaV3_7G026770/CsaV3_5G024820	csv:101219296/csv:101203215/csv:101204836/csv:101207880/csv:101217169/csv:101210506/csv:101211263/csv:105436154/csv:101220596	9	7	CsaV3_6G053210/CsaV3_1G002650/CsaV3_3G011970/CsaV3_3G007170/CsaV3_6G040600/CsaV3_7G026770/CsaV3_5G024820	2	novel.495/CsaV3_1G003160
csv00770	Pantothenate and CoA biosynthesis	4/880	22/4182	0.71083	0.999603	CsaV3_6G036910/CsaV3_6G003860/CsaV3_3G011200/CsaV3_2G025820	CsaV3_6G036910/CsaV3_6G003860/CsaV3_3G011200/CsaV3_2G025820	csv:101220670/csv:101203236/csv:101217323/csv:101214004	4	0		4	CsaV3_6G036910/CsaV3_6G003860/CsaV3_3G011200/CsaV3_2G025820
csv02010	ABC transporters	4/880	22/4182	0.71083	0.999603	CsaV3_4G011860/CsaV3_3G021800/CsaV3_5G005630/CsaV3_2G035680	CsaV3_4G011860/CsaV3_3G021800/CsaV3_5G005630/CsaV3_2G035680	csv:101206409/csv:101210136/csv:101211598/csv:101223228	4	2	CsaV3_4G011860/CsaV3_2G035680	2	CsaV3_3G021800/CsaV3_5G005630
csv00460	Cyanoamino acid metabolism	8/880	43/4182	0.711285	0.999603	CsaV3_2G010460/CsaV3_6G000650/CsaV3_6G043980/CsaV3_4G028640/CsaV3_2G030460/CsaV3_1G004550/CsaV3_1G043200/CsaV3_2G008210	CsaV3_2G010460/CsaV3_6G000650/CsaV3_6G043980/CsaV3_4G028640/CsaV3_2G030460/CsaV3_1G004550/CsaV3_1G043200/CsaV3_2G008210	csv:101220742/csv:101220896/csv:101206142/csv:101215287/csv:101222345/csv:101204835/csv:101210312/csv:101218493	8	5	CsaV3_2G010460/CsaV3_6G000650/CsaV3_2G030460/CsaV3_1G004550/CsaV3_2G008210	3	CsaV3_6G043980/CsaV3_4G028640/CsaV3_1G043200
csv00250	Alanine, aspartate and glutamate metabolism	10/880	54/4182	0.727635	0.999603	CsaV3_2G030250/CsaV3_7G030560/CsaV3_1G007880/CsaV3_3G031010/CsaV3_5G031220/CsaV3_2G024880/CsaV3_6G039090/CsaV3_3G033240/CsaV3_2G015340/CsaV3_1G005000	CsaV3_2G030250/CsaV3_7G030560/CsaV3_1G007880/CsaV3_3G031010/CsaV3_5G031220/CsaV3_2G024880/CsaV3_6G039090/CsaV3_3G033240/CsaV3_2G015340/CsaV3_1G005000	csv:101213711/csv:101213413/csv:101214440/csv:101207254/csv:101220645/csv:101207914/csv:101207975/csv:101203709/csv:101203840/csv:101210903	10	8	CsaV3_2G030250/CsaV3_7G030560/CsaV3_3G031010/CsaV3_5G031220/CsaV3_2G024880/CsaV3_6G039090/CsaV3_3G033240/CsaV3_1G005000	2	CsaV3_1G007880/CsaV3_2G015340
csv00260	Glycine, serine and threonine metabolism	13/880	70/4182	0.739901	0.999603	CsaV3_3G000370/CsaV3_3G043270/CsaV3_1G010620/CsaV3_5G031220/CsaV3_4G013550/CsaV3_4G028640/CsaV3_7G022600/CsaV3_2G024880/CsaV3_2G030460/CsaV3_6G039090/CsaV3_3G033240/CsaV3_6G038140/CsaV3_UNG227830	CsaV3_3G000370/CsaV3_3G043270/CsaV3_1G010620/CsaV3_5G031220/CsaV3_4G013550/CsaV3_4G028640/CsaV3_7G022600/CsaV3_2G024880/CsaV3_2G030460/CsaV3_6G039090/CsaV3_3G033240/CsaV3_6G038140/CsaV3_UNG227830	csv:101202934/csv:101222321/csv:101209820/csv:101220645/csv:101217925/csv:101215287/csv:101210998/csv:101207914/csv:101222345/csv:101207975/csv:101203709/csv:101222232/csv:101219910	13	11	CsaV3_3G000370/CsaV3_3G043270/CsaV3_1G010620/CsaV3_5G031220/CsaV3_4G013550/CsaV3_2G024880/CsaV3_2G030460/CsaV3_6G039090/CsaV3_3G033240/CsaV3_6G038140/CsaV3_UNG227830	2	CsaV3_4G028640/CsaV3_7G022600
csv00564	Glycerophospholipid metabolism	17/880	91/4182	0.750362	0.999603	CsaV3_4G001340/CsaV3_4G027880/CsaV3_2G010330/CsaV3_3G005860/CsaV3_5G024850/CsaV3_3G032790/CsaV3_6G002870/CsaV3_7G001740/CsaV3_4G024550/CsaV3_5G036950/CsaV3_7G024460/CsaV3_6G005980/CsaV3_5G034740/CsaV3_2G008470/CsaV3_3G048840/CsaV3_1G038830/CsaV3_6G022720	CsaV3_4G001340/CsaV3_4G027880/CsaV3_2G010330/CsaV3_3G005860/CsaV3_5G024850/CsaV3_3G032790/CsaV3_6G002870/CsaV3_7G001740/CsaV3_4G024550/CsaV3_5G036950/CsaV3_7G024460/CsaV3_6G005980/CsaV3_5G034740/CsaV3_2G008470/CsaV3_3G048840/CsaV3_1G038830/CsaV3_6G022720	csv:101218579/csv:101220288/csv:101218290/csv:101208743/csv:101221307/csv:101218126/csv:101209183/csv:101211796/csv:101210022/csv:101215524/csv:101217425/csv:101218942/csv:101208533/csv:101204879/csv:101213494/csv:101222774/csv:101211856	17	6	CsaV3_4G001340/CsaV3_6G002870/CsaV3_7G001740/CsaV3_5G036950/CsaV3_7G024460/CsaV3_1G038830	11	CsaV3_4G027880/CsaV3_2G010330/CsaV3_3G005860/CsaV3_5G024850/CsaV3_3G032790/CsaV3_4G024550/CsaV3_6G005980/CsaV3_5G034740/CsaV3_2G008470/CsaV3_3G048840/CsaV3_6G022720
csv00520	Amino sugar and nucleotide sugar metabolism	22/880	117/4182	0.760292	0.999603	CsaV3_5G028300/CsaV3_6G052860/CsaV3_3G009770/CsaV3_6G048050/CsaV3_5G026440/CsaV3_2G014910/CsaV3_7G002310/CsaV3_1G038770/CsaV3_6G006000/CsaV3_3G021110/CsaV3_4G009070/CsaV3_3G035180/CsaV3_3G045830/CsaV3_6G047760/CsaV3_2G028640/CsaV3_5G001840/CsaV3_2G001890/CsaV3_5G006710/CsaV3_3G008510/CsaV3_2G002740/CsaV3_5G032690/CsaV3_6G033720	CsaV3_5G028300/CsaV3_6G052860/CsaV3_3G009770/CsaV3_6G048050/CsaV3_5G026440/CsaV3_2G014910/CsaV3_7G002310/CsaV3_1G038770/CsaV3_6G006000/CsaV3_3G021110/CsaV3_4G009070/CsaV3_3G035180/CsaV3_3G045830/CsaV3_6G047760/CsaV3_2G028640/CsaV3_5G001840/CsaV3_2G001890/CsaV3_5G006710/CsaV3_3G008510/CsaV3_2G002740/CsaV3_5G032690/CsaV3_6G033720	csv:101218883/csv:101204428/csv:101215329/csv:101214692/csv:101210360/csv:101208904/csv:101216573/csv:101222058/csv:101223005/csv:101220298/csv:101218758/csv:101204038/csv:101216058/csv:101216853/csv:101217944/csv:101205820/csv:101218300/csv:101202942/csv:101216129/csv:101223173/csv:101219143/csv:101221070	22	17	CsaV3_5G028300/CsaV3_6G052860/CsaV3_3G009770/CsaV3_5G026440/CsaV3_2G014910/CsaV3_7G002310/CsaV3_1G038770/CsaV3_3G021110/CsaV3_3G035180/CsaV3_3G045830/CsaV3_6G047760/CsaV3_2G028640/CsaV3_5G001840/CsaV3_2G001890/CsaV3_5G006710/CsaV3_2G002740/CsaV3_6G033720	5	CsaV3_6G048050/CsaV3_6G006000/CsaV3_4G009070/CsaV3_3G008510/CsaV3_5G032690
csv00750	Vitamin B6 metabolism	2/880	13/4182	0.793484	0.999603	CsaV3_3G000370/CsaV3_3G033790	CsaV3_3G000370/CsaV3_3G033790	csv:101202934/csv:101212698	2	1	CsaV3_3G000370	1	CsaV3_3G033790
csv00760	Nicotinate and nicotinamide metabolism	3/880	19/4182	0.796102	0.999603	CsaV3_3G004240/CsaV3_UNG236470/CsaV3_6G040600	CsaV3_3G004240/CsaV3_UNG236470/CsaV3_6G040600	csv:101222585/csv:101208793/csv:101211263	3	3	CsaV3_3G004240/CsaV3_UNG236470/CsaV3_6G040600	0
csv00350	Tyrosine metabolism	6/880	36/4182	0.799891	0.999603	CsaV3_6G007280/CsaV3_7G024950/CsaV3_7G022600/CsaV3_6G038140/CsaV3_7G024990/CsaV3_1G031900	CsaV3_6G007280/CsaV3_7G024950/CsaV3_7G022600/CsaV3_6G038140/CsaV3_7G024990/CsaV3_1G031900	csv:101208145/csv:101209854/csv:101210998/csv:101222232/csv:101206036/csv:101203411	6	5	CsaV3_6G007280/CsaV3_7G024950/CsaV3_6G038140/CsaV3_7G024990/CsaV3_1G031900	1	CsaV3_7G022600
csv00053	Ascorbate and aldarate metabolism	7/880	42/4182	0.811147	0.999603	CsaV3_1G042210/CsaV3_6G040510/CsaV3_7G022020/CsaV3_5G002470/CsaV3_6G034310/CsaV3_1G017100/CsaV3_4G028150	CsaV3_1G042210/CsaV3_6G040510/CsaV3_7G022020/CsaV3_5G002470/CsaV3_6G034310/CsaV3_1G017100/CsaV3_4G028150	csv:101215231/csv:101210277/csv:101205337/csv:101214011/csv:101216755/csv:101217972/csv:101219329	7	4	CsaV3_1G042210/CsaV3_6G040510/CsaV3_5G002470/CsaV3_6G034310	3	CsaV3_7G022020/CsaV3_1G017100/CsaV3_4G028150
csv00740	Riboflavin metabolism	2/880	14/4182	0.827301	0.999603	CsaV3_6G000480/CsaV3_6G003290	CsaV3_6G000480/CsaV3_6G003290	csv:101202904/csv:101212510	2	0		2	CsaV3_6G000480/CsaV3_6G003290
csv00360	Phenylalanine metabolism	7/880	43/4182	0.830564	0.999603	CsaV3_6G014060/CsaV3_7G022600/CsaV3_2G015800/CsaV3_1G039020/CsaV3_6G038140/CsaV3_4G002300/CsaV3_1G031900	CsaV3_6G014060/CsaV3_7G022600/CsaV3_2G015800/CsaV3_1G039020/CsaV3_6G038140/CsaV3_4G002300/CsaV3_1G031900	csv:101218156/csv:101210998/csv:101214819/csv:101209171/csv:101222232/csv:101203846/csv:101203411	7	5	CsaV3_6G014060/CsaV3_2G015800/CsaV3_1G039020/CsaV3_6G038140/CsaV3_1G031900	2	CsaV3_7G022600/CsaV3_4G002300
csv01212	Fatty acid metabolism	11/880	66/4182	0.849546	0.999603	CsaV3_4G004790/CsaV3_1G042350/CsaV3_4G023750/CsaV3_5G004490/CsaV3_3G002510/CsaV3_7G002460/CsaV3_3G011240/CsaV3_UNG137080/CsaV3_6G001070/CsaV3_5G030680/CsaV3_4G008750	CsaV3_4G004790/CsaV3_1G042350/CsaV3_4G023750/CsaV3_5G004490/CsaV3_3G002510/CsaV3_7G002460/CsaV3_3G011240/CsaV3_UNG137080/CsaV3_6G001070/CsaV3_5G030680/CsaV3_4G008750	csv:101207195/csv:101217385/csv:101210519/csv:101222043/csv:101212007/csv:101214645/csv:101217710/csv:101218159/csv:101212704/csv:101206427/csv:101222930	11	8	CsaV3_4G004790/CsaV3_1G042350/CsaV3_4G023750/CsaV3_5G004490/CsaV3_7G002460/CsaV3_UNG137080/CsaV3_5G030680/CsaV3_4G008750	3	CsaV3_3G002510/CsaV3_3G011240/CsaV3_6G001070
csv01040	Biosynthesis of unsaturated fatty acids	3/880	21/4182	0.850028	0.999603	CsaV3_3G011240/CsaV3_UNG137080/CsaV3_5G030680	CsaV3_3G011240/CsaV3_UNG137080/CsaV3_5G030680	csv:101217710/csv:101218159/csv:101206427	3	2	CsaV3_UNG137080/CsaV3_5G030680	1	CsaV3_3G011240
csv00950	Isoquinoline alkaloid biosynthesis	2/880	15/4182	0.856048	0.999603	CsaV3_7G022600/CsaV3_6G038140	CsaV3_7G022600/CsaV3_6G038140	csv:101210998/csv:101222232	2	1	CsaV3_6G038140	1	CsaV3_7G022600
csv00061	Fatty acid biosynthesis	5/880	34/4182	0.872108	0.999603	CsaV3_4G004790/CsaV3_1G042350/CsaV3_4G023750/CsaV3_6G001070/CsaV3_4G008750	CsaV3_4G004790/CsaV3_1G042350/CsaV3_4G023750/CsaV3_6G001070/CsaV3_4G008750	csv:101207195/csv:101217385/csv:101210519/csv:101212704/csv:101222930	5	4	CsaV3_4G004790/CsaV3_1G042350/CsaV3_4G023750/CsaV3_4G008750	1	CsaV3_6G001070
csv00290	Valine, leucine and isoleucine biosynthesis	2/880	16/4182	0.880358	0.999603	CsaV3_3G011200/CsaV3_2G025820	CsaV3_3G011200/CsaV3_2G025820	csv:101217323/csv:101214004	2	0		2	CsaV3_3G011200/CsaV3_2G025820
csv00565	Ether lipid metabolism	3/880	23/4182	0.891086	0.999603	CsaV3_4G027880/CsaV3_6G005980/CsaV3_6G022720	CsaV3_4G027880/CsaV3_6G005980/CsaV3_6G022720	csv:101220288/csv:101218942/csv:101211856	3	0		3	CsaV3_4G027880/CsaV3_6G005980/CsaV3_6G022720
csv00650	Butanoate metabolism	3/880	23/4182	0.891086	0.999603	CsaV3_3G040810/CsaV3_7G002460/CsaV3_1G005000	CsaV3_3G040810/CsaV3_7G002460/CsaV3_1G005000	csv:101207316/csv:101214645/csv:101210903	3	2	CsaV3_7G002460/CsaV3_1G005000	1	CsaV3_3G040810
csv00730	Thiamine metabolism	3/880	23/4182	0.891086	0.999603	CsaV3_3G027210/CsaV3_3G005340/CsaV3_3G000300	CsaV3_3G027210/CsaV3_3G005340/CsaV3_3G000300	csv:101217918/csv:101211553/csv:101203894	3	1	CsaV3_3G005340	2	CsaV3_3G027210/CsaV3_3G000300
csv00450	Selenocompound metabolism	2/880	17/4182	0.900824	0.999603	CsaV3_5G026430/CsaV3_1G041720	CsaV3_5G026430/CsaV3_1G041720	csv:101210109/csv:101218702	2	1	CsaV3_1G041720	1	CsaV3_5G026430
csv00941	Flavonoid biosynthesis	2/880	17/4182	0.900824	0.999603	CsaV3_5G030330/CsaV3_3G000790	CsaV3_5G030330/CsaV3_3G000790	csv:101212121/csv:101215613	2	1	CsaV3_3G000790	1	CsaV3_5G030330
csv03020	RNA polymerase	6/880	42/4182	0.903125	0.999603	CsaV3_6G048110/CsaV3_3G039160/CsaV3_3G017180/CsaV3_7G035230/CsaV3_UNG188480/CsaV3_7G030940	CsaV3_6G048110/CsaV3_3G039160/CsaV3_3G017180/CsaV3_7G035230/CsaV3_UNG188480/CsaV3_7G030940	csv:101213971/csv:101205880/csv:101211588/csv:101204777/csv:101207932/csv:101208535	6	2	CsaV3_6G048110/CsaV3_UNG188480	4	CsaV3_3G039160/CsaV3_3G017180/CsaV3_7G035230/CsaV3_7G030940
csv00920	Sulfur metabolism	4/880	30/4182	0.903313	0.999603	CsaV3_7G018620/CsaV3_6G000650/CsaV3_1G010690/CsaV3_1G013880	CsaV3_7G018620/CsaV3_6G000650/CsaV3_1G010690/CsaV3_1G013880	csv:101213467/csv:101220896/csv:101211864/csv:101214714	4	1	CsaV3_6G000650	3	CsaV3_7G018620/CsaV3_1G010690/CsaV3_1G013880
csv00130	Ubiquinone and other terpenoid-quinone biosynthesis	6/880	43/4182	0.914892	0.999603	CsaV3_5G031500/CsaV3_2G036010/CsaV3_6G052370/CsaV3_6G015650/CsaV3_1G012970/CsaV3_7G031620	CsaV3_5G031500/CsaV3_2G036010/CsaV3_6G052370/CsaV3_6G015650/CsaV3_1G012970/CsaV3_7G031620	csv:101216706/csv:101205148/csv:101212842/csv:101220123/csv:101222437/csv:101218121	6	3	CsaV3_5G031500/CsaV3_6G052370/CsaV3_7G031620	3	CsaV3_2G036010/CsaV3_6G015650/CsaV3_1G012970
csv00908	Zeatin biosynthesis	2/880	18/4182	0.917985	0.999603	CsaV3_5G039210/CsaV3_1G040510	CsaV3_5G039210/CsaV3_1G040510	csv:101215037/csv:101207014	2	1	CsaV3_5G039210	1	CsaV3_1G040510
csv03013	RNA transport	24/880	143/4182	0.918561	0.999603	CsaV3_7G021830/CsaV3_3G004860/CsaV3_5G025900/CsaV3_1G029680/CsaV3_5G012490/CsaV3_3G010520/CsaV3_1G024130/CsaV3_5G003280/CsaV3_1G032830/CsaV3_2G011610/CsaV3_4G006310/CsaV3_1G034540/CsaV3_2G004470/CsaV3_1G029790/CsaV3_5G039870/CsaV3_7G025160/CsaV3_7G027560/CsaV3_3G040740/CsaV3_1G005090/CsaV3_4G009280/CsaV3_6G001680/CsaV3_4G034360/CsaV3_6G038690/CsaV3_1G003560	CsaV3_7G021830/CsaV3_3G004860/CsaV3_5G025900/CsaV3_1G029680/CsaV3_5G012490/CsaV3_3G010520/CsaV3_1G024130/CsaV3_5G003280/CsaV3_1G032830/CsaV3_2G011610/CsaV3_4G006310/CsaV3_1G034540/CsaV3_2G004470/CsaV3_1G029790/CsaV3_5G039870/CsaV3_7G025160/CsaV3_7G027560/CsaV3_3G040740/CsaV3_1G005090/CsaV3_4G009280/CsaV3_6G001680/CsaV3_4G034360/CsaV3_6G038690/CsaV3_1G003560	csv:101202908/csv:101220230/csv:101220517/csv:101211465/csv:101220434/csv:101222372/csv:101210714/csv:101205107/csv:101206312/csv:101215193/csv:101208103/csv:101207842/csv:101217025/csv:101211465/csv:101203561/csv:101204360/csv:101217528/csv:101205955/csv:101212619/csv:101217101/csv:101205957/csv:101203145/csv:101222392/csv:101215104	24	7	CsaV3_3G004860/CsaV3_1G029680/CsaV3_1G032830/CsaV3_2G011610/CsaV3_1G029790/CsaV3_1G005090/CsaV3_6G001680	17	CsaV3_7G021830/CsaV3_5G025900/CsaV3_5G012490/CsaV3_3G010520/CsaV3_1G024130/CsaV3_5G003280/CsaV3_4G006310/CsaV3_1G034540/CsaV3_2G004470/CsaV3_5G039870/CsaV3_7G025160/CsaV3_7G027560/CsaV3_3G040740/CsaV3_4G009280/CsaV3_4G034360/CsaV3_6G038690/CsaV3_1G003560
csv00514	Other types of O-glycan biosynthesis	1/880	833790	0.925903	0.999603	CsaV3_2G008800	CsaV3_2G008800	csv:101202868	1	1	CsaV3_2G008800	0
csv03040	Spliceosome	26/880	157/4182	0.937032	0.999603	CsaV3_2G009170/CsaV3_7G024760/CsaV3_4G008320/CsaV3_3G038490/CsaV3_1G043660/CsaV3_1G014350/CsaV3_7G030160/CsaV3_5G026520/CsaV3_5G027420/CsaV3_2G006940/CsaV3_2G012590/CsaV3_5G006530/CsaV3_3G011750/CsaV3_1G004710/CsaV3_4G035260/CsaV3_6G049830/CsaV3_4G001320/CsaV3_4G004880/CsaV3_6G052680/CsaV3_1G007610/CsaV3_4G000090/CsaV3_5G036520/CsaV3_3G042620/CsaV3_3G040470/CsaV3_7G005550/CsaV3_1G038750	CsaV3_2G009170/CsaV3_7G024760/CsaV3_4G008320/CsaV3_3G038490/CsaV3_1G043660/CsaV3_1G014350/CsaV3_7G030160/CsaV3_5G026520/CsaV3_5G027420/CsaV3_2G006940/CsaV3_2G012590/CsaV3_5G006530/CsaV3_3G011750/CsaV3_1G004710/CsaV3_4G035260/CsaV3_6G049830/CsaV3_4G001320/CsaV3_4G004880/CsaV3_6G052680/CsaV3_1G007610/CsaV3_4G000090/CsaV3_5G036520/CsaV3_3G042620/CsaV3_3G040470/CsaV3_7G005550/CsaV3_1G038750	csv:101215564/csv:101212307/csv:101207569/csv:101216466/csv:101222791/csv:101219553/csv:101218276/csv:101211905/csv:101206291/csv:101206387/csv:101213128/csv:101219411/csv:101204424/csv:101207648/csv:101203479/csv:101209661/csv:101219042/csv:101213550/csv:101207463/csv:101208137/csv:101220076/csv:101221699/csv:101215674/csv:101203374/csv:101216712/csv:101223011	26	3	CsaV3_1G004710/CsaV3_6G052680/CsaV3_1G007610	23	CsaV3_2G009170/CsaV3_7G024760/CsaV3_4G008320/CsaV3_3G038490/CsaV3_1G043660/CsaV3_1G014350/CsaV3_7G030160/CsaV3_5G026520/CsaV3_5G027420/CsaV3_2G006940/CsaV3_2G012590/CsaV3_5G006530/CsaV3_3G011750/CsaV3_4G035260/CsaV3_6G049830/CsaV3_4G001320/CsaV3_4G004880/CsaV3_4G000090/CsaV3_5G036520/CsaV3_3G042620/CsaV3_3G040470/CsaV3_7G005550/CsaV3_1G038750
csv00945	Stilbenoid, diarylheptanoid and gingerol biosynthesis	1/880	833820	0.941536	0.999603	CsaV3_5G030330	CsaV3_5G030330	csv:101212121	1	0		1	CsaV3_5G030330
csv00960	Tropane, piperidine and pyridine alkaloid biosynthesis	2/880	20/4182	0.944268	0.999603	CsaV3_7G022600/CsaV3_6G038140	CsaV3_7G022600/CsaV3_6G038140	csv:101210998/csv:101222232	2	1	CsaV3_6G038140	1	CsaV3_7G022600
csv00591	Linoleic acid metabolism	2/880	21/4182	0.954188	0.999603	CsaV3_4G027880/novel.506	CsaV3_4G027880/-	csv:101220288/csv:101214880	2	1	novel.506	1	CsaV3_4G027880
csv00510	N-Glycan biosynthesis	5/880	42/4182	0.958798	0.999603	CsaV3_5G031040/CsaV3_1G013400/CsaV3_5G026660/CsaV3_7G000470/CsaV3_3G001440	CsaV3_5G031040/CsaV3_1G013400/CsaV3_5G026660/CsaV3_7G000470/CsaV3_3G001440	csv:101222690/csv:101218949/csv:101213832/csv:101215230/csv:101208659	5	1	CsaV3_3G001440	4	CsaV3_5G031040/CsaV3_1G013400/CsaV3_5G026660/CsaV3_7G000470
csv04075	Plant hormone signal transduction	36/880	216/4182	0.958923	0.999603	CsaV3_2G004130/CsaV3_2G026460/CsaV3_3G012170/CsaV3_3G030830/CsaV3_1G031470/CsaV3_7G008500/CsaV3_6G045980/CsaV3_3G001710/CsaV3_7G000560/CsaV3_7G000890/CsaV3_1G021860/CsaV3_7G027600/CsaV3_5G009010/CsaV3_6G043710/CsaV3_7G025380/CsaV3_5G028350/CsaV3_3G016530/CsaV3_7G007580/CsaV3_1G034580/CsaV3_3G008140/CsaV3_2G004120/CsaV3_1G041270/CsaV3_3G040130/CsaV3_6G042190/CsaV3_5G008910/CsaV3_3G026280/CsaV3_4G0…	CsaV3_2G004130/CsaV3_2G026460/CsaV3_3G012170/CsaV3_3G030830/CsaV3_1G031470/CsaV3_7G008500/CsaV3_6G045980/CsaV3_3G001710/CsaV3_7G000560/CsaV3_7G000890/CsaV3_1G021860/CsaV3_7G027600/CsaV3_5G009010/CsaV3_6G043710/CsaV3_7G025380/CsaV3_5G028350/CsaV3_3G016530/CsaV3_7G007580/CsaV3_1G034580/CsaV3_3G008140/CsaV3_2G004120/CsaV3_1G041270/CsaV3_3G040130/CsaV3_6G042190/CsaV3_5G008910/CsaV3_3G026280/CsaV3_4G0…	csv:101223028/csv:101205442/csv:101210326/csv:101204473/csv:101209219/csv:101203950/csv:101216171/csv:101205372/csv:101203091/csv:101205750/csv:101215632/csv:101218948/csv:101216829/csv:101214967/csv:101205805/csv:101204164/csv:101206634/csv:101211323/csv:101206871/csv:101211059/csv:101216767/csv:101212154/csv:101219149/csv:101209118/csv:101209478/csv:101207038/csv:101209540/csv:101210839/csv:101…	36	16	CsaV3_2G004130/CsaV3_2G026460/CsaV3_1G031470/CsaV3_7G000560/CsaV3_7G000890/CsaV3_1G021860/CsaV3_7G027600/CsaV3_7G025380/CsaV3_5G028350/CsaV3_7G007580/CsaV3_2G004120/CsaV3_6G042190/CsaV3_3G026280/CsaV3_7G034270/CsaV3_6G043720/CsaV3_3G022370	20	CsaV3_3G012170/CsaV3_3G030830/CsaV3_7G008500/CsaV3_6G045980/CsaV3_3G001710/CsaV3_5G009010/CsaV3_6G043710/CsaV3_3G016530/CsaV3_1G034580/CsaV3_3G008140/CsaV3_1G041270/CsaV3_3G040130/CsaV3_5G008910/CsaV3_4G030060/CsaV3_5G024480/CsaV3_3G040450/CsaV3_6G008270/CsaV3_6G045260/CsaV3_2G002930/CsaV3_1G014770
csv00905	Brassinosteroid biosynthesis	1/880	14/4182	0.96361	0.999603	CsaV3_1G029710	CsaV3_1G029710	csv:101213466	1	0		1	CsaV3_1G029710
csv04136	Autophagy - other	3/880	30/4182	0.967131	0.999603	CsaV3_3G018020/CsaV3_3G034550/CsaV3_2G007770	CsaV3_3G018020/CsaV3_3G034550/CsaV3_2G007770	csv:101205497/csv:101221608/csv:101215606	3	0		3	CsaV3_3G018020/CsaV3_3G034550/CsaV3_2G007770
csv00904	Diterpenoid biosynthesis	2/880	25/4182	0.979412	0.999603	CsaV3_3G010170/CsaV3_7G023060	CsaV3_3G010170/CsaV3_7G023060	csv:101221667/csv:101217426	2	1	CsaV3_3G010170	1	CsaV3_7G023060
csv04130	SNARE interactions in vesicular transport	3/880	33/4182	0.980897	0.999603	CsaV3_3G038070/CsaV3_2G006850/CsaV3_3G041240	CsaV3_3G038070/CsaV3_2G006850/CsaV3_3G041240	csv:101208931/csv:101207998/csv:101213977	3	0		3	CsaV3_3G038070/CsaV3_2G006850/CsaV3_3G041240
csv03440	Homologous recombination	8/880	68/4182	0.98472	0.999603	novel.1064/CsaV3_6G031560/CsaV3_3G037350/CsaV3_UNG178380/CsaV3_UNG224630/CsaV3_4G028020/CsaV3_6G022120/CsaV3_UNG040210	-/CsaV3_6G031560/CsaV3_3G037350/CsaV3_UNG178380/CsaV3_UNG224630/CsaV3_4G028020/CsaV3_6G022120/CsaV3_UNG040210	csv:101210305/csv:101214977/csv:101203835/csv:101210305/csv:101212525/csv:101212525/csv:101212497/csv:101210305	8	5	novel.1064/CsaV3_6G031560/CsaV3_3G037350/CsaV3_UNG224630/CsaV3_UNG040210	3	CsaV3_UNG178380/CsaV3_4G028020/CsaV3_6G022120
csv00900	Terpenoid backbone biosynthesis	5/880	49/4182	0.986201	0.999603	CsaV3_1G002370/CsaV3_1G044500/CsaV3_7G002460/CsaV3_4G007960/CsaV3_3G006740	CsaV3_1G002370/CsaV3_1G044500/CsaV3_7G002460/CsaV3_4G007960/CsaV3_3G006740	csv:101221755/csv:101209923/csv:101214645/csv:101214140/csv:101212112	5	4	CsaV3_1G002370/CsaV3_1G044500/CsaV3_7G002460/CsaV3_3G006740	1	CsaV3_4G007960
csv03015	mRNA surveillance pathway	12/880	96/4182	0.989871	0.999603	CsaV3_1G037380/CsaV3_1G006980/CsaV3_1G037370/CsaV3_1G001420/CsaV3_1G043450/CsaV3_5G024420/CsaV3_1G034540/CsaV3_1G045580/CsaV3_1G013590/CsaV3_5G029960/CsaV3_2G031630/CsaV3_1G007000	CsaV3_1G037380/CsaV3_1G006980/CsaV3_1G037370/CsaV3_1G001420/CsaV3_1G043450/CsaV3_5G024420/CsaV3_1G034540/CsaV3_1G045580/CsaV3_1G013590/CsaV3_5G029960/CsaV3_2G031630/CsaV3_1G007000	csv:101215977/csv:101217340/csv:101215977/csv:101206601/csv:101220502/csv:101211088/csv:101207842/csv:101211261/csv:101206311/csv:101222141/csv:101203139/csv:101217809	12	3	CsaV3_1G045580/CsaV3_2G031630/CsaV3_1G007000	9	CsaV3_1G037380/CsaV3_1G006980/CsaV3_1G037370/CsaV3_1G001420/CsaV3_1G043450/CsaV3_5G024420/CsaV3_1G034540/CsaV3_1G013590/CsaV3_5G029960
csv00513	Various types of N-glycan biosynthesis	2/880	32/4182	0.995153	0.999603	CsaV3_6G004710/CsaV3_5G006710	CsaV3_6G004710/CsaV3_5G006710	csv:101216230/csv:101202942	2	1	CsaV3_5G006710	1	CsaV3_6G004710
csv00400	Phenylalanine, tyrosine and tryptophan biosynthesis	3/880	41/4182	0.995778	0.999603	CsaV3_2G029790/CsaV3_3G043270/CsaV3_6G036360	CsaV3_2G029790/CsaV3_3G043270/CsaV3_6G036360	csv:101220636/csv:101222321/csv:101205929	3	1	CsaV3_3G043270	2	CsaV3_2G029790/CsaV3_6G036360
csv03010	Ribosome	40/880	281/4182	0.999015	0.999603	CsaV3_6G007430/CsaV3_1G006670/CsaV3_5G006630/CsaV3_2G012470/CsaV3_3G007330/CsaV3_6G046990/CsaV3_5G006380/CsaV3_UNG208960/novel.376/CsaV3_7G007910/CsaV3_6G022450/CsaV3_1G037420/CsaV3_3G031960/CsaV3_2G015470/CsaV3_2G008580/CsaV3_2G013050/CsaV3_5G030080/CsaV3_3G016300/CsaV3_1G042100/CsaV3_2G035950/CsaV3_4G007420/CsaV3_1G033650/CsaV3_6G034270/CsaV3_4G005150/CsaV3_2G012650/CsaV3_4G011790/CsaV3_2G01749…	CsaV3_6G007430/CsaV3_1G006670/CsaV3_5G006630/CsaV3_2G012470/CsaV3_3G007330/CsaV3_6G046990/CsaV3_5G006380/CsaV3_UNG208960/-/CsaV3_7G007910/CsaV3_6G022450/CsaV3_1G037420/CsaV3_3G031960/CsaV3_2G015470/CsaV3_2G008580/CsaV3_2G013050/CsaV3_5G030080/CsaV3_3G016300/CsaV3_1G042100/CsaV3_2G035950/CsaV3_4G007420/CsaV3_1G033650/CsaV3_6G034270/CsaV3_4G005150/CsaV3_2G012650/CsaV3_4G011790/CsaV3_2G017490/CsaV3_…	csv:101208982/csv:101214225/csv:101221575/csv:101208982/csv:101218660/csv:101204269/csv:101222172/csv:3429316/csv:101208313/csv:101211861/csv:101209059/csv:101212288/csv:101218332/csv:101211191/csv:101220228/csv:101216114/csv:101216379/csv:101209551/csv:101204062/csv:101205390/csv:101212658/csv:101221487/csv:101216990/csv:101212340/csv:101206069/csv:101212017/csv:101208580/csv:101209436/csv:10121…	40	36	CsaV3_6G007430/CsaV3_1G006670/CsaV3_5G006630/CsaV3_2G012470/CsaV3_3G007330/CsaV3_6G046990/novel.376/CsaV3_7G007910/CsaV3_6G022450/CsaV3_1G037420/CsaV3_2G015470/CsaV3_2G008580/CsaV3_2G013050/CsaV3_5G030080/CsaV3_3G016300/CsaV3_1G042100/CsaV3_4G007420/CsaV3_1G033650/CsaV3_6G034270/CsaV3_4G005150/CsaV3_2G012650/CsaV3_4G011790/CsaV3_2G017490/CsaV3_7G022360/CsaV3_7G031930/CsaV3_1G039500/CsaV3_6G007700…	4	CsaV3_5G006380/CsaV3_UNG208960/CsaV3_3G031960/CsaV3_2G035950
csv00940	Phenylpropanoid biosynthesis	16/880	140/4182	0.999151	0.999603	CsaV3_4G008590/CsaV3_4G023610/CsaV3_2G010460/CsaV3_5G030330/CsaV3_1G010780/CsaV3_4G023630/CsaV3_6G014060/CsaV3_3G004010/CsaV3_3G047080/CsaV3_1G030610/CsaV3_3G046050/CsaV3_1G004550/CsaV3_4G002300/CsaV3_1G037110/CsaV3_7G031620/CsaV3_4G023660	CsaV3_4G008590/CsaV3_4G023610/CsaV3_2G010460/CsaV3_5G030330/CsaV3_1G010780/CsaV3_4G023630/CsaV3_6G014060/CsaV3_3G004010/CsaV3_3G047080/CsaV3_1G030610/CsaV3_3G046050/CsaV3_1G004550/CsaV3_4G002300/CsaV3_1G037110/CsaV3_7G031620/CsaV3_4G023660	csv:101204109/csv:101212717/csv:101220742/csv:101212121/csv:101214168/csv:101212230/csv:101218156/csv:101214916/csv:101218982/csv:101219029/csv:101213170/csv:101204835/csv:101203846/csv:101208856/csv:101218121/csv:101211507	16	11	CsaV3_4G008590/CsaV3_4G023610/CsaV3_2G010460/CsaV3_1G010780/CsaV3_4G023630/CsaV3_6G014060/CsaV3_3G047080/CsaV3_1G004550/CsaV3_1G037110/CsaV3_7G031620/CsaV3_4G023660	5	CsaV3_5G030330/CsaV3_3G004010/CsaV3_1G030610/CsaV3_3G046050/CsaV3_4G002300
csv03030	DNA replication	2/880	41/4182	0.999289	0.999603	CsaV3_3G037350/CsaV3_6G046400	CsaV3_3G037350/CsaV3_6G046400	csv:101203835/csv:101218071	2	1	CsaV3_3G037350	1	CsaV3_6G046400
csv03410	Base excision repair	1/880	33/4182	0.999603	0.999603	CsaV3_6G047130	CsaV3_6G047130	csv:101222374	1	0		1	CsaV3_6G047130

## Sheet: XS_40vsXN_40DAP KEGG
KEGGID	Description	GeneRatio	BgRatio	pvalue	padj	geneID	geneName	keggID	Count	Up	Up_Gene_names	Down	Down_Gene_names
csv00270	Cysteine and methionine metabolism	47/1171	100/4131	4.67e-05	0.00489266	CsaV3_2G007750/CsaV3_2G007760/CsaV3_6G048630/CsaV3_2G013530/CsaV3_3G040500/CsaV3_3G020560/CsaV3_3G020550/CsaV3_6G000650/CsaV3_6G000890/CsaV3_7G027790/CsaV3_2G001540/CsaV3_5G031670/CsaV3_4G033420/CsaV3_6G015400/CsaV3_1G013270/CsaV3_6G028390/CsaV3_6G015190/CsaV3_2G011670/CsaV3_6G037780/CsaV3_4G026970/CsaV3_7G018620/CsaV3_7G000760/CsaV3_3G000880/CsaV3_6G044520/CsaV3_4G004900/CsaV3_5G000580/CsaV3_3G0…	CsaV3_2G007750/CsaV3_2G007760/CsaV3_6G048630/CsaV3_2G013530/CsaV3_3G040500/CsaV3_3G020560/CsaV3_3G020550/CsaV3_6G000650/CsaV3_6G000890/CsaV3_7G027790/CsaV3_2G001540/CsaV3_5G031670/CsaV3_4G033420/CsaV3_6G015400/CsaV3_1G013270/CsaV3_6G028390/CsaV3_6G015190/CsaV3_2G011670/CsaV3_6G037780/CsaV3_4G026970/CsaV3_7G018620/CsaV3_7G000760/CsaV3_3G000880/CsaV3_6G044520/CsaV3_4G004900/CsaV3_5G000580/CsaV3_3G0…	csv:101215844/csv:101207514/csv:101204103/csv:101222725/csv:101203129/csv:101207514/csv:101207514/csv:101220896/csv:101211475/csv:101221323/csv:101203726/csv:101213410/csv:101212407/csv:101221653/csv:101217299/csv:101214377/csv:101221092/csv:101215667/csv:101209525/csv:101210304/csv:101213467/csv:101204791/csv:101214172/csv:101219252/csv:101208662/csv:101222254/csv:101212743/csv:101217331/csv:101…	47	33	CsaV3_2G007750/CsaV3_2G007760/CsaV3_6G048630/CsaV3_3G040500/CsaV3_3G020560/CsaV3_3G020550/CsaV3_6G000650/CsaV3_2G001540/CsaV3_5G031670/CsaV3_1G013270/CsaV3_6G028390/CsaV3_6G015190/CsaV3_2G011670/CsaV3_4G026970/CsaV3_7G000760/CsaV3_5G000580/CsaV3_3G028000/CsaV3_3G041150/CsaV3_7G032920/CsaV3_6G039940/novel.86/CsaV3_5G013990/CsaV3_7G029770/CsaV3_3G018170/novel.85/CsaV3_1G001620/CsaV3_3G013880/CsaV3_…	14	CsaV3_2G013530/CsaV3_6G000890/CsaV3_7G027790/CsaV3_4G033420/CsaV3_6G015400/CsaV3_6G037780/CsaV3_7G018620/CsaV3_3G000880/CsaV3_6G044520/CsaV3_4G004900/CsaV3_UNG210440/CsaV3_2G006550/CsaV3_1G039690/CsaV3_2G025820
csv00500	Starch and sucrose metabolism	52/1171	117/4131	0.000119717	0.00489266	CsaV3_7G002310/CsaV3_5G020420/CsaV3_1G022900/CsaV3_2G033300/CsaV3_3G003030/CsaV3_2G014910/CsaV3_1G001640/CsaV3_4G008840/CsaV3_1G046750/CsaV3_3G046790/CsaV3_3G037440/CsaV3_4G029230/CsaV3_3G045370/CsaV3_2G011150/CsaV3_6G051510/CsaV3_3G043060/CsaV3_1G032200/CsaV3_5G001560/CsaV3_3G038290/CsaV3_1G042470/CsaV3_1G044130/CsaV3_5G037090/CsaV3_5G031700/CsaV3_3G011520/CsaV3_3G006840/CsaV3_1G005170/CsaV3_5G0…	CsaV3_7G002310/CsaV3_5G020420/CsaV3_1G022900/CsaV3_2G033300/CsaV3_3G003030/CsaV3_2G014910/CsaV3_1G001640/CsaV3_4G008840/CsaV3_1G046750/CsaV3_3G046790/CsaV3_3G037440/CsaV3_4G029230/CsaV3_3G045370/CsaV3_2G011150/CsaV3_6G051510/CsaV3_3G043060/CsaV3_1G032200/CsaV3_5G001560/CsaV3_3G038290/CsaV3_1G042470/CsaV3_1G044130/CsaV3_5G037090/CsaV3_5G031700/CsaV3_3G011520/CsaV3_3G006840/CsaV3_1G005170/CsaV3_5G0…	csv:101216573/csv:101211461/csv:101223071/csv:101220898/csv:101220548/csv:101208904/csv:101209676/csv:101221832/csv:101216685/csv:101202827/csv:101223138/csv:101216247/csv:101221562/csv:101208942/csv:101216214/csv:101223112/csv:101205766/csv:101208974/csv:101212615/csv:101208027/csv:101206753/csv:101212873/csv:101212688/csv:101221739/csv:101213564/csv:101216865/csv:101205644/csv:101207192/csv:101…	52	38	CsaV3_7G002310/CsaV3_5G020420/CsaV3_1G022900/CsaV3_2G033300/CsaV3_3G003030/CsaV3_2G014910/CsaV3_4G008840/CsaV3_1G046750/CsaV3_3G046790/CsaV3_3G037440/CsaV3_4G029230/CsaV3_3G045370/CsaV3_2G011150/CsaV3_3G043060/CsaV3_1G032200/CsaV3_5G001560/CsaV3_3G038290/CsaV3_1G042470/CsaV3_5G037090/CsaV3_3G006840/CsaV3_1G005170/CsaV3_5G035080/CsaV3_3G001510/CsaV3_7G028580/CsaV3_3G036980/CsaV3_5G024150/CsaV3_1G0…	14	CsaV3_1G001640/CsaV3_6G051510/CsaV3_1G044130/CsaV3_5G031700/CsaV3_3G011520/CsaV3_2G012230/CsaV3_6G051060/CsaV3_7G030570/CsaV3_6G044620/CsaV3_4G004750/CsaV3_2G001860/CsaV3_7G021990/CsaV3_3G041330/CsaV3_6G015080
csv00196	Photosynthesis - antenna proteins	14/1171	20/4131	0.000128754	0.00489266	CsaV3_5G025740/CsaV3_6G051520/CsaV3_5G039350/CsaV3_3G031580/CsaV3_3G005950/CsaV3_1G002410/CsaV3_7G002620/CsaV3_6G005340/CsaV3_5G030270/CsaV3_6G013800/CsaV3_1G041230/CsaV3_1G032510/CsaV3_4G037740/CsaV3_4G037730	CsaV3_5G025740/CsaV3_6G051520/CsaV3_5G039350/CsaV3_3G031580/CsaV3_3G005950/CsaV3_1G002410/CsaV3_7G002620/CsaV3_6G005340/CsaV3_5G030270/CsaV3_6G013800/CsaV3_1G041230/CsaV3_1G032510/CsaV3_4G037740/CsaV3_4G037730	csv:101211428/csv:101221671/csv:101218137/csv:101203342/csv:101207278/csv:101222701/csv:101212963/csv:101204705/csv:101214055/csv:101213845/csv:101211430/csv:101211276/csv:101209460/csv:101209460	14	11	CsaV3_5G025740/CsaV3_6G051520/CsaV3_5G039350/CsaV3_3G031580/CsaV3_3G005950/CsaV3_1G002410/CsaV3_7G002620/CsaV3_6G005340/CsaV3_5G030270/CsaV3_6G013800/CsaV3_1G032510	3	CsaV3_1G041230/CsaV3_4G037740/CsaV3_4G037730
csv00240	Pyrimidine metabolism	23/1171	47/4131	0.00210362	0.0599532	CsaV3_3G007170/CsaV3_3G011970/CsaV3_5G020740/CsaV3_1G002650/CsaV3_3G020520/CsaV3_6G040600/CsaV3_3G041260/CsaV3_4G001780/CsaV3_6G006570/CsaV3_3G010330/CsaV3_1G040320/novel.495/CsaV3_2G014940/CsaV3_3G027630/CsaV3_7G021480/CsaV3_3G004920/CsaV3_6G053210/CsaV3_7G021350/CsaV3_3G043750/CsaV3_2G010660/CsaV3_2G028630/CsaV3_5G033670/CsaV3_6G042080	CsaV3_3G007170/CsaV3_3G011970/CsaV3_5G020740/CsaV3_1G002650/CsaV3_3G020520/CsaV3_6G040600/CsaV3_3G041260/CsaV3_4G001780/CsaV3_6G006570/CsaV3_3G010330/CsaV3_1G040320/-/CsaV3_2G014940/CsaV3_3G027630/CsaV3_7G021480/CsaV3_3G004920/CsaV3_6G053210/CsaV3_7G021350/CsaV3_3G043750/CsaV3_2G010660/CsaV3_2G028630/CsaV3_5G033670/CsaV3_6G042080	csv:101217169/csv:101207880/csv:101214106/csv:101204836/csv:101207261/csv:101211263/csv:101214458/csv:101212270/csv:101223081/csv:101204669/csv:101209098/csv:101203215/csv:101208660/csv:101222416/csv:101219714/csv:101220705/csv:101219296/csv:101218056/csv:101203747/csv:101203551/csv:101218654/csv:101208611/csv:101210105	23	15	CsaV3_3G007170/CsaV3_3G011970/CsaV3_1G002650/CsaV3_3G020520/CsaV3_6G040600/CsaV3_6G006570/CsaV3_3G010330/CsaV3_2G014940/CsaV3_3G027630/CsaV3_7G021480/CsaV3_3G004920/CsaV3_7G021350/CsaV3_2G028630/CsaV3_5G033670/CsaV3_6G042080	8	CsaV3_5G020740/CsaV3_3G041260/CsaV3_4G001780/CsaV3_1G040320/novel.495/CsaV3_6G053210/CsaV3_3G043750/CsaV3_2G010660
csv04146	Peroxisome	31/1171	74/4131	0.00804858	0.183508	CsaV3_2G011380/CsaV3_1G043170/CsaV3_4G004420/CsaV3_4G006560/CsaV3_4G037250/CsaV3_3G002720/CsaV3_7G002420/CsaV3_6G048870/CsaV3_6G037870/CsaV3_2G014350/CsaV3_5G027250/CsaV3_4G002910/CsaV3_3G013480/CsaV3_6G014930/CsaV3_6G039090/CsaV3_6G038810/CsaV3_4G013220/CsaV3_1G046130/CsaV3_3G028760/CsaV3_2G034560/CsaV3_1G045840/CsaV3_2G004490/CsaV3_4G002560/CsaV3_2G002690/CsaV3_1G004740/CsaV3_6G051820/CsaV3_5G0…	CsaV3_2G011380/CsaV3_1G043170/CsaV3_4G004420/CsaV3_4G006560/CsaV3_4G037250/CsaV3_3G002720/CsaV3_7G002420/CsaV3_6G048870/CsaV3_6G037870/CsaV3_2G014350/CsaV3_5G027250/CsaV3_4G002910/CsaV3_3G013480/CsaV3_6G014930/CsaV3_6G039090/CsaV3_6G038810/CsaV3_4G013220/CsaV3_1G046130/CsaV3_3G028760/CsaV3_2G034560/CsaV3_1G045840/CsaV3_2G004490/CsaV3_4G002560/CsaV3_2G002690/CsaV3_1G004740/CsaV3_6G051820/CsaV3_5G0…	csv:101212301/csv:101217893/csv:101222338/csv:101202800/csv:101202931/csv:101220303/csv:101212158/csv:101221512/csv:101211500/csv:101203288/csv:101202770/csv:101216694/csv:101207461/csv:101209050/csv:101207975/csv:101203798/csv:101222901/csv:101205111/csv:101208182/csv:101220632/csv:101214017/csv:101216556/csv:101221260/csv:101203635/csv:101207896/csv:101215498/csv:101222521/csv:101212704/csv:101…	31	7	CsaV3_4G006560/CsaV3_6G048870/CsaV3_6G037870/CsaV3_6G014930/CsaV3_1G046130/CsaV3_3G028760/CsaV3_1G045840	24	CsaV3_2G011380/CsaV3_1G043170/CsaV3_4G004420/CsaV3_4G037250/CsaV3_3G002720/CsaV3_7G002420/CsaV3_2G014350/CsaV3_5G027250/CsaV3_4G002910/CsaV3_3G013480/CsaV3_6G039090/CsaV3_6G038810/CsaV3_4G013220/CsaV3_2G034560/CsaV3_2G004490/CsaV3_4G002560/CsaV3_2G002690/CsaV3_1G004740/CsaV3_6G051820/CsaV3_5G004440/CsaV3_6G001070/CsaV3_7G004280/CsaV3_6G005940/CsaV3_UNG137080
csv04016	MAPK signaling pathway - plant	45/1171	122/4131	0.0235025	0.437168	CsaV3_3G007170/CsaV3_2G016930/CsaV3_2G002930/CsaV3_1G034580/CsaV3_5G002910/CsaV3_6G000890/CsaV3_3G016530/CsaV3_7G026460/CsaV3_6G048850/CsaV3_3G017270/CsaV3_3G001710/CsaV3_6G051540/CsaV3_4G037250/CsaV3_1G007340/CsaV3_2G029000/CsaV3_5G002510/CsaV3_1G038860/CsaV3_6G004610/CsaV3_2G032070/CsaV3_3G033450/CsaV3_1G004720/CsaV3_3G043720/CsaV3_3G002220/CsaV3_3G001740/CsaV3_3G027970/CsaV3_4G035580/CsaV3_3G0…	CsaV3_3G007170/CsaV3_2G016930/CsaV3_2G002930/CsaV3_1G034580/CsaV3_5G002910/CsaV3_6G000890/CsaV3_3G016530/CsaV3_7G026460/CsaV3_6G048850/CsaV3_3G017270/CsaV3_3G001710/CsaV3_6G051540/CsaV3_4G037250/CsaV3_1G007340/CsaV3_2G029000/CsaV3_5G002510/CsaV3_1G038860/CsaV3_6G004610/CsaV3_2G032070/CsaV3_3G033450/CsaV3_1G004720/CsaV3_3G043720/CsaV3_3G002220/CsaV3_3G001740/CsaV3_3G027970/CsaV3_4G035580/CsaV3_3G0…	csv:101217169/csv:101206398/csv:101220113/csv:101206871/csv:101220448/csv:101211475/csv:101206634/csv:101223223/csv:101210574/csv:101214961/csv:101205372/csv:101215973/csv:101202931/csv:101203133/csv:101213478/csv:101214254/csv:101206498/csv:101214396/csv:101216639/csv:101206842/csv:101207158/csv:101203499/csv:101207431/csv:101204882/csv:101214188/csv:101207734/csv:101207154/csv:101206218/csv:101…	45	23	CsaV3_3G007170/CsaV3_2G016930/CsaV3_2G002930/CsaV3_5G002910/CsaV3_6G048850/CsaV3_3G017270/CsaV3_2G029000/CsaV3_5G002510/CsaV3_1G038860/CsaV3_6G004610/CsaV3_3G033450/CsaV3_3G001740/CsaV3_4G035580/CsaV3_3G046430/CsaV3_6G045260/CsaV3_7G007620/CsaV3_5G002350/CsaV3_4G012010/CsaV3_7G008840/CsaV3_7G006290/CsaV3_1G042580/CsaV3_2G028990/CsaV3_4G026530	22	CsaV3_1G034580/CsaV3_6G000890/CsaV3_3G016530/CsaV3_7G026460/CsaV3_3G001710/CsaV3_6G051540/CsaV3_4G037250/CsaV3_1G007340/CsaV3_2G032070/CsaV3_1G004720/CsaV3_3G043720/CsaV3_3G002220/CsaV3_3G027970/CsaV3_2G034810/CsaV3_3G022000/CsaV3_6G052820/CsaV3_4G030060/CsaV3_6G001990/CsaV3_6G005310/CsaV3_3G033350/CsaV3_4G030050/CsaV3_6G004660
csv01200	Carbon metabolism	83/1171	244/4131	0.0268436	0.437168	CsaV3_4G013270/CsaV3_6G044640/CsaV3_5G028490/CsaV3_1G009520/CsaV3_5G026370/CsaV3_5G031220/CsaV3_7G022960/CsaV3_6G000650/CsaV3_6G040230/CsaV3_1G009420/CsaV3_3G023610/CsaV3_2G011710/CsaV3_5G034910/CsaV3_1G043170/CsaV3_6G001210/CsaV3_4G006330/CsaV3_4G000040/CsaV3_7G035320/CsaV3_6G004010/CsaV3_1G013270/CsaV3_2G017260/CsaV3_4G037250/CsaV3_2G015280/CsaV3_4G025880/CsaV3_6G028390/CsaV3_6G040210/CsaV3_1G0…	CsaV3_4G013270/CsaV3_6G044640/CsaV3_5G028490/CsaV3_1G009520/CsaV3_5G026370/CsaV3_5G031220/CsaV3_7G022960/CsaV3_6G000650/CsaV3_6G040230/CsaV3_1G009420/CsaV3_3G023610/CsaV3_2G011710/CsaV3_5G034910/CsaV3_1G043170/CsaV3_6G001210/CsaV3_4G006330/CsaV3_4G000040/CsaV3_7G035320/CsaV3_6G004010/CsaV3_1G013270/CsaV3_2G017260/CsaV3_4G037250/CsaV3_2G015280/CsaV3_4G025880/CsaV3_6G028390/CsaV3_6G040210/CsaV3_1G0…	csv:101221948/csv:101220209/csv:101212988/csv:101214523/csv:101208883/csv:101220645/csv:101215988/csv:101220896/csv:101205680/csv:101213319/csv:101214108/csv:101215910/csv:101211316/csv:101217893/csv:101214545/csv:101206171/csv:101220786/csv:101214072/csv:101205576/csv:101217299/csv:101209304/csv:101202931/csv:101204323/csv:101211927/csv:101214377/csv:101205445/csv:101213074/csv:101216029/csv:101…	83	44	CsaV3_4G013270/CsaV3_6G044640/CsaV3_5G028490/CsaV3_5G026370/CsaV3_5G031220/CsaV3_7G022960/CsaV3_6G000650/CsaV3_1G009420/CsaV3_2G011710/CsaV3_6G001210/CsaV3_4G006330/CsaV3_4G000040/CsaV3_1G013270/CsaV3_2G017260/CsaV3_6G028390/CsaV3_1G009410/CsaV3_4G017590/CsaV3_4G008750/CsaV3_3G043780/CsaV3_4G004380/CsaV3_3G010370/CsaV3_7G002460/CsaV3_6G047780/CsaV3_2G030460/CsaV3_5G007980/CsaV3_6G036340/CsaV3_1G0…	39	CsaV3_1G009520/CsaV3_6G040230/CsaV3_3G023610/CsaV3_5G034910/CsaV3_1G043170/CsaV3_7G035320/CsaV3_6G004010/CsaV3_4G037250/CsaV3_2G015280/CsaV3_4G025880/CsaV3_6G040210/CsaV3_2G003650/CsaV3_7G007110/CsaV3_3G015070/CsaV3_5G027250/CsaV3_5G035850/CsaV3_7G018620/CsaV3_5G034360/CsaV3_6G039090/CsaV3_6G044520/CsaV3_6G047510/CsaV3_2G034560/CsaV3_2G034200/CsaV3_3G009790/CsaV3_4G027510/CsaV3_3G043770/CsaV3_1G0…
csv00565	Ether lipid metabolism	11/1171	23/4131	0.036655	0.464297	CsaV3_1G000490/CsaV3_2G006790/CsaV3_1G043430/CsaV3_5G033710/CsaV3_2G028530/CsaV3_6G047530/CsaV3_4G036540/CsaV3_3G043940/CsaV3_4G027880/CsaV3_5G024400/CsaV3_6G016260	CsaV3_1G000490/CsaV3_2G006790/CsaV3_1G043430/CsaV3_5G033710/CsaV3_2G028530/CsaV3_6G047530/CsaV3_4G036540/CsaV3_3G043940/CsaV3_4G027880/CsaV3_5G024400/CsaV3_6G016260	csv:101212856/csv:101220522/csv:101218054/csv:101207886/csv:101218421/csv:101217251/csv:101213538/csv:101206396/csv:101220288/csv:101205809/csv:101211426	11	6	CsaV3_1G000490/CsaV3_2G006790/CsaV3_1G043430/CsaV3_6G047530/CsaV3_4G036540/CsaV3_6G016260	5	CsaV3_5G033710/CsaV3_2G028530/CsaV3_3G043940/CsaV3_4G027880/CsaV3_5G024400
csv00650	Butanoate metabolism	11/1171	23/4131	0.036655	0.464297	CsaV3_5G020650/CsaV3_1G000550/CsaV3_4G007380/CsaV3_3G003490/CsaV3_3G043780/CsaV3_3G015070/CsaV3_7G002460/CsaV3_4G029010/CsaV3_6G038810/CsaV3_3G043770/CsaV3_5G017290	CsaV3_5G020650/CsaV3_1G000550/CsaV3_4G007380/CsaV3_3G003490/CsaV3_3G043780/CsaV3_3G015070/CsaV3_7G002460/CsaV3_4G029010/CsaV3_6G038810/CsaV3_3G043770/CsaV3_5G017290	csv:101216119/csv:101213339/csv:101220932/csv:101208259/csv:101204237/csv:101209903/csv:101214645/csv:101204963/csv:101203798/csv:101203992/csv:101208026	11	6	CsaV3_5G020650/CsaV3_4G007380/CsaV3_3G003490/CsaV3_3G043780/CsaV3_7G002460/CsaV3_5G017290	5	CsaV3_1G000550/CsaV3_3G015070/CsaV3_4G029010/CsaV3_6G038810/CsaV3_3G043770
csv04144	Endocytosis	51/1171	145/4131	0.040943	0.46675	CsaV3_2G006790/CsaV3_2G002330/CsaV3_3G009580/CsaV3_7G024760/CsaV3_6G003390/CsaV3_5G039590/CsaV3_6G047530/CsaV3_6G052350/CsaV3_3G036240/CsaV3_6G004830/CsaV3_2G024640/CsaV3_2G009170/CsaV3_6G047650/CsaV3_6G052700/CsaV3_6G003380/CsaV3_6G043530/CsaV3_1G037330/CsaV3_6G022530/CsaV3_3G011790/CsaV3_2G016000/CsaV3_1G006690/CsaV3_4G037410/CsaV3_3G004730/CsaV3_3G043940/CsaV3_5G005360/CsaV3_6G036650/CsaV3_7G0…	CsaV3_2G006790/CsaV3_2G002330/CsaV3_3G009580/CsaV3_7G024760/CsaV3_6G003390/CsaV3_5G039590/CsaV3_6G047530/CsaV3_6G052350/CsaV3_3G036240/CsaV3_6G004830/CsaV3_2G024640/CsaV3_2G009170/CsaV3_6G047650/CsaV3_6G052700/CsaV3_6G003380/CsaV3_6G043530/CsaV3_1G037330/CsaV3_6G022530/CsaV3_3G011790/CsaV3_2G016000/CsaV3_1G006690/CsaV3_4G037410/CsaV3_3G004730/CsaV3_3G043940/CsaV3_5G005360/CsaV3_6G036650/CsaV3_7G0…	csv:101220522/csv:101210509/csv:101212194/csv:101212307/csv:101211044/csv:101220753/csv:101217251/csv:101218116/csv:101203066/csv:101217898/csv:101211832/csv:101215564/csv:101215810/csv:101208440/csv:101210797/csv:101212793/csv:101211569/csv:101209152/csv:101204911/csv:101218079/csv:101214704/csv:101204624/csv:101217617/csv:101206396/csv:101216417/csv:101217735/csv:101218255/csv:101203943/csv:101…	51	28	CsaV3_2G006790/CsaV3_2G002330/CsaV3_3G009580/CsaV3_6G047530/CsaV3_3G036240/CsaV3_6G004830/CsaV3_2G024640/CsaV3_6G047650/CsaV3_6G003380/CsaV3_6G043530/CsaV3_6G022530/CsaV3_3G011790/CsaV3_1G006690/CsaV3_4G037410/CsaV3_3G004730/CsaV3_5G005360/CsaV3_3G035110/CsaV3_7G034960/CsaV3_5G026450/CsaV3_6G022210/CsaV3_4G024720/CsaV3_3G001690/CsaV3_2G025780/CsaV3_7G008260/CsaV3_6G037410/CsaV3_5G023290/CsaV3_3G0…	23	CsaV3_7G024760/CsaV3_6G003390/CsaV3_5G039590/CsaV3_6G052350/CsaV3_2G009170/CsaV3_6G052700/CsaV3_1G037330/CsaV3_2G016000/CsaV3_3G043940/CsaV3_6G036650/CsaV3_7G023490/CsaV3_1G040030/CsaV3_5G026520/CsaV3_5G003780/CsaV3_1G045850/CsaV3_5G003600/CsaV3_6G001460/CsaV3_5G029500/CsaV3_3G044370/CsaV3_1G040140/CsaV3_3G032290/CsaV3_4G003710/CsaV3_4G028490
csv00710	Carbon fixation in photosynthetic organisms	29/1171	77/4131	0.0469189	0.48625	CsaV3_6G044640/CsaV3_5G028490/CsaV3_5G031220/CsaV3_7G022960/CsaV3_1G009420/CsaV3_3G023610/CsaV3_5G034910/CsaV3_6G001210/CsaV3_7G035320/CsaV3_6G004010/CsaV3_1G013270/CsaV3_2G015280/CsaV3_4G025880/CsaV3_6G028390/CsaV3_1G009410/CsaV3_3G010370/CsaV3_5G035850/CsaV3_5G034360/CsaV3_6G044520/CsaV3_2G034200/CsaV3_3G009790/CsaV3_UNG009100/CsaV3_1G005660/CsaV3_UNG082650/CsaV3_UNG071590/CsaV3_1G039740/CsaV3_…	CsaV3_6G044640/CsaV3_5G028490/CsaV3_5G031220/CsaV3_7G022960/CsaV3_1G009420/CsaV3_3G023610/CsaV3_5G034910/CsaV3_6G001210/CsaV3_7G035320/CsaV3_6G004010/CsaV3_1G013270/CsaV3_2G015280/CsaV3_4G025880/CsaV3_6G028390/CsaV3_1G009410/CsaV3_3G010370/CsaV3_5G035850/CsaV3_5G034360/CsaV3_6G044520/CsaV3_2G034200/CsaV3_3G009790/CsaV3_UNG009100/CsaV3_1G005660/CsaV3_UNG082650/CsaV3_UNG071590/CsaV3_1G039740/CsaV3_…	csv:101220209/csv:101212988/csv:101220645/csv:101215988/csv:101213319/csv:101214108/csv:101211316/csv:101214545/csv:101214072/csv:101205576/csv:101217299/csv:101204323/csv:101211927/csv:101214377/csv:101213074/csv:101204181/csv:101211170/csv:101219300/csv:101219252/csv:101209273/csv:101215805/csv:101212275/csv:101219871/csv:101212275/csv:101204181/csv:101219936/csv:101207078/csv:101204181/csv:101…	29	13	CsaV3_6G044640/CsaV3_5G028490/CsaV3_5G031220/CsaV3_7G022960/CsaV3_1G009420/CsaV3_6G001210/CsaV3_1G013270/CsaV3_6G028390/CsaV3_1G009410/CsaV3_3G010370/CsaV3_UNG071590/CsaV3_4G008360/CsaV3_1G002350	16	CsaV3_3G023610/CsaV3_5G034910/CsaV3_7G035320/CsaV3_6G004010/CsaV3_2G015280/CsaV3_4G025880/CsaV3_5G035850/CsaV3_5G034360/CsaV3_6G044520/CsaV3_2G034200/CsaV3_3G009790/CsaV3_UNG009100/CsaV3_1G005660/CsaV3_UNG082650/CsaV3_1G039740/novel.1201
csv00562	Inositol phosphate metabolism	24/1171	64/4131	0.0697234	0.662373	CsaV3_2G036570/CsaV3_3G002010/CsaV3_2G036580/CsaV3_1G000490/CsaV3_7G033950/CsaV3_1G036210/CsaV3_1G040000/CsaV3_1G043430/CsaV3_6G045630/CsaV3_2G014560/CsaV3_7G034100/CsaV3_7G007110/CsaV3_5G010130/CsaV3_3G036240/CsaV3_4G004810/CsaV3_2G001660/CsaV3_UNG190490/CsaV3_2G014550/CsaV3_3G048980/CsaV3_5G010390/CsaV3_6G016260/CsaV3_6G037410/CsaV3_5G023290/CsaV3_4G028490	CsaV3_2G036570/CsaV3_3G002010/CsaV3_2G036580/CsaV3_1G000490/CsaV3_7G033950/CsaV3_1G036210/CsaV3_1G040000/CsaV3_1G043430/CsaV3_6G045630/CsaV3_2G014560/CsaV3_7G034100/CsaV3_7G007110/CsaV3_5G010130/CsaV3_3G036240/CsaV3_4G004810/CsaV3_2G001660/CsaV3_UNG190490/CsaV3_2G014550/CsaV3_3G048980/CsaV3_5G010390/CsaV3_6G016260/CsaV3_6G037410/CsaV3_5G023290/CsaV3_4G028490	csv:101218009/csv:101215556/csv:101223134/csv:101212856/csv:101211666/csv:101204232/csv:101202978/csv:101218054/csv:101211833/csv:101214424/csv:101213518/csv:101204924/csv:101212421/csv:101203066/csv:101207441/csv:101221451/csv:101207441/csv:101214424/csv:101211396/csv:101221482/csv:101211426/csv:101215596/csv:101219958/csv:101208830	24	21	CsaV3_2G036570/CsaV3_3G002010/CsaV3_2G036580/CsaV3_1G000490/CsaV3_7G033950/CsaV3_1G036210/CsaV3_1G043430/CsaV3_6G045630/CsaV3_2G014560/CsaV3_7G034100/CsaV3_5G010130/CsaV3_3G036240/CsaV3_4G004810/CsaV3_2G001660/CsaV3_UNG190490/CsaV3_2G014550/CsaV3_3G048980/CsaV3_5G010390/CsaV3_6G016260/CsaV3_6G037410/CsaV3_5G023290	3	CsaV3_1G040000/CsaV3_7G007110/CsaV3_4G028490
csv00670	One carbon pool by folate	8/1171	17/4131	0.07827	0.686368	CsaV3_2G011710/CsaV3_1G010170/CsaV3_2G030460/CsaV3_2G014940/CsaV3_1G010620/CsaV3_6G005120/CsaV3_1G001940/CsaV3_2G011840	CsaV3_2G011710/CsaV3_1G010170/CsaV3_2G030460/CsaV3_2G014940/CsaV3_1G010620/CsaV3_6G005120/CsaV3_1G001940/CsaV3_2G011840	csv:101215910/csv:101206006/csv:101222345/csv:101208660/csv:101209820/csv:101222878/csv:101211739/csv:101216871	8	8	CsaV3_2G011710/CsaV3_1G010170/CsaV3_2G030460/CsaV3_2G014940/CsaV3_1G010620/CsaV3_6G005120/CsaV3_1G001940/CsaV3_2G011840	0
csv04145	Phagosome	23/1171	63/4131	0.0974611	0.715648	CsaV3_3G034310/CsaV3_7G033950/CsaV3_4G000060/CsaV3_3G046610/CsaV3_2G002140/CsaV3_3G026970/CsaV3_1G037170/CsaV3_6G044510/CsaV3_3G017070/CsaV3_2G016070/CsaV3_2G029570/CsaV3_1G043560/CsaV3_2G031740/CsaV3_6G036650/CsaV3_7G023490/CsaV3_2G029210/CsaV3_7G000200/CsaV3_2G024270/CsaV3_2G029320/CsaV3_3G043190/CsaV3_4G025920/CsaV3_3G010990/CsaV3_7G033710	CsaV3_3G034310/CsaV3_7G033950/CsaV3_4G000060/CsaV3_3G046610/CsaV3_2G002140/CsaV3_3G026970/CsaV3_1G037170/CsaV3_6G044510/CsaV3_3G017070/CsaV3_2G016070/CsaV3_2G029570/CsaV3_1G043560/CsaV3_2G031740/CsaV3_6G036650/CsaV3_7G023490/CsaV3_2G029210/CsaV3_7G000200/CsaV3_2G024270/CsaV3_2G029320/CsaV3_3G043190/CsaV3_4G025920/CsaV3_3G010990/CsaV3_7G033710	csv:101218443/csv:101211666/csv:101221020/csv:101205012/csv:101209852/csv:101215372/csv:101209837/csv:101217909/csv:101213515/csv:101219263/csv:101204817/csv:101221614/csv:101221052/csv:101217735/csv:101218255/csv:101209817/csv:101211364/csv:101216083/csv:101209079/csv:101204049/csv:101210703/csv:101213721/csv:101216234	23	14	CsaV3_3G034310/CsaV3_7G033950/CsaV3_4G000060/CsaV3_3G046610/CsaV3_2G002140/CsaV3_3G026970/CsaV3_6G044510/CsaV3_3G017070/CsaV3_2G016070/CsaV3_2G029570/CsaV3_2G029210/CsaV3_2G024270/CsaV3_3G043190/CsaV3_4G025920	9	CsaV3_1G037170/CsaV3_1G043560/CsaV3_2G031740/CsaV3_6G036650/CsaV3_7G023490/CsaV3_7G000200/CsaV3_2G029320/CsaV3_3G010990/CsaV3_7G033710
csv00564	Glycerophospholipid metabolism	31/1171	89/4131	0.106463	0.715648	CsaV3_4G001340/CsaV3_5G028680/CsaV3_1G000490/CsaV3_2G006790/CsaV3_2G028420/CsaV3_1G043430/CsaV3_5G033710/CsaV3_2G028530/CsaV3_2G033910/CsaV3_6G047530/CsaV3_3G032790/CsaV3_1G029760/CsaV3_4G024550/CsaV3_4G002900/CsaV3_4G036540/CsaV3_5G011040/CsaV3_3G005860/CsaV3_3G043940/CsaV3_6G038110/CsaV3_4G027880/CsaV3_5G008230/CsaV3_5G024400/CsaV3_1G006010/CsaV3_5G024850/CsaV3_1G032230/CsaV3_6G016260/CsaV3_5G0…	CsaV3_4G001340/CsaV3_5G028680/CsaV3_1G000490/CsaV3_2G006790/CsaV3_2G028420/CsaV3_1G043430/CsaV3_5G033710/CsaV3_2G028530/CsaV3_2G033910/CsaV3_6G047530/CsaV3_3G032790/CsaV3_1G029760/CsaV3_4G024550/CsaV3_4G002900/CsaV3_4G036540/CsaV3_5G011040/CsaV3_3G005860/CsaV3_3G043940/CsaV3_6G038110/CsaV3_4G027880/CsaV3_5G008230/CsaV3_5G024400/CsaV3_1G006010/CsaV3_5G024850/CsaV3_1G032230/CsaV3_6G016260/CsaV3_5G0…	csv:101218579/csv:101205141/csv:101212856/csv:101220522/csv:101220795/csv:101218054/csv:101207886/csv:101218421/csv:101213816/csv:101217251/csv:101218126/csv:101211291/csv:101210022/csv:101216924/csv:101213538/csv:101217526/csv:101208743/csv:101206396/csv:101214551/csv:101220288/csv:101205124/csv:101205809/csv:101222932/csv:101221307/csv:101205296/csv:101211426/csv:101218307/csv:101221229/csv:101…	31	14	CsaV3_4G001340/CsaV3_1G000490/CsaV3_2G006790/CsaV3_1G043430/CsaV3_2G033910/CsaV3_6G047530/CsaV3_4G036540/CsaV3_6G038110/CsaV3_1G006010/CsaV3_1G032230/CsaV3_6G016260/CsaV3_5G026900/CsaV3_1G018390/CsaV3_1G004320	17	CsaV3_5G028680/CsaV3_2G028420/CsaV3_5G033710/CsaV3_2G028530/CsaV3_3G032790/CsaV3_1G029760/CsaV3_4G024550/CsaV3_4G002900/CsaV3_5G011040/CsaV3_3G005860/CsaV3_3G043940/CsaV3_4G027880/CsaV3_5G008230/CsaV3_5G024400/CsaV3_5G024850/CsaV3_5G006440/CsaV3_3G048840
csv00960	Tropane, piperidine and pyridine alkaloid biosynthesis	9/1171	21/4131	0.110515	0.715648	CsaV3_5G003800/CsaV3_4G033420/CsaV3_1G013270/CsaV3_5G003790/CsaV3_6G015190/CsaV3_4G000360/CsaV3_3G034620/CsaV3_1G001170/CsaV3_1G034560	CsaV3_5G003800/CsaV3_4G033420/CsaV3_1G013270/CsaV3_5G003790/CsaV3_6G015190/CsaV3_4G000360/CsaV3_3G034620/CsaV3_1G001170/CsaV3_1G034560	csv:101212818/csv:101212407/csv:101217299/csv:101213059/csv:101221092/csv:101212914/csv:101205728/csv:101204200/csv:101206180	9	8	CsaV3_5G003800/CsaV3_1G013270/CsaV3_5G003790/CsaV3_6G015190/CsaV3_4G000360/CsaV3_3G034620/CsaV3_1G001170/CsaV3_1G034560	1	CsaV3_4G033420
csv04712	Circadian rhythm - plant	12/1171	30/4131	0.113535	0.715648	CsaV3_5G000090/CsaV3_6G005020/CsaV3_4G024430/CsaV3_5G014370/CsaV3_3G047490/CsaV3_7G002530/CsaV3_2G026240/CsaV3_2G025750/CsaV3_3G015190/CsaV3_3G049750/CsaV3_6G044000/CsaV3_2G007370	CsaV3_5G000090/CsaV3_6G005020/CsaV3_4G024430/CsaV3_5G014370/CsaV3_3G047490/CsaV3_7G002530/CsaV3_2G026240/CsaV3_2G025750/CsaV3_3G015190/CsaV3_3G049750/CsaV3_6G044000/CsaV3_2G007370	csv:101209788/csv:101220984/csv:101210765/csv:101222712/csv:101213649/csv:101211915/csv:101207500/csv:101203735/csv:101212197/csv:101211694/csv:101205903/csv:101216738	12	8	CsaV3_5G000090/CsaV3_6G005020/CsaV3_4G024430/CsaV3_5G014370/CsaV3_7G002530/CsaV3_3G049750/CsaV3_6G044000/CsaV3_2G007370	4	CsaV3_3G047490/CsaV3_2G026240/CsaV3_2G025750/CsaV3_3G015190
csv00400	Phenylalanine, tyrosine and tryptophan biosynthesis	15/1171	40/4131	0.133429	0.715648	CsaV3_5G038370/CsaV3_1G014510/CsaV3_3G043270/CsaV3_4G033420/CsaV3_1G013270/CsaV3_6G015190/CsaV3_4G036570/CsaV3_4G000360/CsaV3_1G008610/CsaV3_6G042420/CsaV3_6G001800/CsaV3_3G004760/CsaV3_6G021500/CsaV3_7G006730/CsaV3_4G031290	CsaV3_5G038370/CsaV3_1G014510/CsaV3_3G043270/CsaV3_4G033420/CsaV3_1G013270/CsaV3_6G015190/CsaV3_4G036570/CsaV3_4G000360/CsaV3_1G008610/CsaV3_6G042420/CsaV3_6G001800/CsaV3_3G004760/CsaV3_6G021500/CsaV3_7G006730/CsaV3_4G031290	csv:101203315/csv:101222151/csv:101222321/csv:101212407/csv:101217299/csv:101221092/csv:101213051/csv:101212914/csv:101204330/csv:101204463/csv:101217107/csv:101218330/csv:101217934/csv:101221603/csv:101203740	15	8	CsaV3_1G014510/CsaV3_3G043270/CsaV3_1G013270/CsaV3_6G015190/CsaV3_4G036570/CsaV3_4G000360/CsaV3_1G008610/CsaV3_6G001800	7	CsaV3_5G038370/CsaV3_4G033420/CsaV3_6G042420/CsaV3_3G004760/CsaV3_6G021500/CsaV3_7G006730/CsaV3_4G031290
csv00480	Glutathione metabolism	26/1171	75/4131	0.137061	0.715648	CsaV3_6G000030/CsaV3_7G029060/CsaV3_4G007720/CsaV3_4G006330/CsaV3_4G025760/CsaV3_5G031670/CsaV3_4G025690/novel.7/CsaV3_1G033510/CsaV3_3G009990/CsaV3_5G027250/CsaV3_5G023890/CsaV3_3G011460/CsaV3_5G000580/CsaV3_3G028000/CsaV3_7G000930/CsaV3_2G031240/CsaV3_3G027630/CsaV3_3G011090/CsaV3_1G001620/CsaV3_3G020840/CsaV3_4G025650/CsaV3_5G002890/CsaV3_4G025770/CsaV3_6G042080/CsaV3_4G006000	CsaV3_6G000030/CsaV3_7G029060/CsaV3_4G007720/CsaV3_4G006330/CsaV3_4G025760/CsaV3_5G031670/CsaV3_4G025690/-/CsaV3_1G033510/CsaV3_3G009990/CsaV3_5G027250/CsaV3_5G023890/CsaV3_3G011460/CsaV3_5G000580/CsaV3_3G028000/CsaV3_7G000930/CsaV3_2G031240/CsaV3_3G027630/CsaV3_3G011090/CsaV3_1G001620/CsaV3_3G020840/CsaV3_4G025650/CsaV3_5G002890/CsaV3_4G025770/CsaV3_6G042080/CsaV3_4G006000	csv:101208623/csv:101212291/csv:101218083/csv:101206171/csv:101213782/csv:101213410/csv:105435246/csv:101203766/csv:101203032/csv:101219529/csv:101202770/csv:101215747/csv:101207634/csv:101222254/csv:101212743/csv:101206941/csv:101208455/csv:101222416/csv:101215496/csv:101210007/csv:101203335/csv:101220464/csv:101220211/csv:101214992/csv:101210105/csv:101211608	26	17	CsaV3_6G000030/CsaV3_7G029060/CsaV3_4G006330/CsaV3_5G031670/novel.7/CsaV3_1G033510/CsaV3_3G009990/CsaV3_5G000580/CsaV3_3G028000/CsaV3_3G027630/CsaV3_3G011090/CsaV3_1G001620/CsaV3_3G020840/CsaV3_4G025650/CsaV3_5G002890/CsaV3_6G042080/CsaV3_4G006000	9	CsaV3_4G007720/CsaV3_4G025760/CsaV3_4G025690/CsaV3_5G027250/CsaV3_5G023890/CsaV3_3G011460/CsaV3_7G000930/CsaV3_2G031240/CsaV3_4G025770
csv00950	Isoquinoline alkaloid biosynthesis	7/1171	16/4131	0.138278	0.715648	CsaV3_5G003800/CsaV3_4G033420/CsaV3_1G013270/CsaV3_5G003790/CsaV3_6G015190/CsaV3_4G000360/CsaV3_1G001170	CsaV3_5G003800/CsaV3_4G033420/CsaV3_1G013270/CsaV3_5G003790/CsaV3_6G015190/CsaV3_4G000360/CsaV3_1G001170	csv:101212818/csv:101212407/csv:101217299/csv:101213059/csv:101221092/csv:101212914/csv:101204200	7	6	CsaV3_5G003800/CsaV3_1G013270/CsaV3_5G003790/CsaV3_6G015190/CsaV3_4G000360/CsaV3_1G001170	1	CsaV3_4G033420
csv00920	Sulfur metabolism	12/1171	31/4131	0.13961	0.715648	CsaV3_6G000650/CsaV3_1G010690/CsaV3_7G018620/CsaV3_3G041150/novel.86/CsaV3_1G039690/novel.85/CsaV3_2G013360/CsaV3_4G032640/CsaV3_5G030130/CsaV3_3G045740/CsaV3_3G043250	CsaV3_6G000650/CsaV3_1G010690/CsaV3_7G018620/CsaV3_3G041150/-/CsaV3_1G039690/-/CsaV3_2G013360/CsaV3_4G032640/CsaV3_5G030130/CsaV3_3G045740/CsaV3_3G043250	csv:101220896/csv:101211864/csv:101213467/csv:101212851/csv:101218979/csv:101218750/csv:101216358/csv:101218495/csv:101221943/csv:101216623/csv:101217416/csv:101204776	12	9	CsaV3_6G000650/CsaV3_3G041150/novel.86/novel.85/CsaV3_2G013360/CsaV3_4G032640/CsaV3_5G030130/CsaV3_3G045740/CsaV3_3G043250	3	CsaV3_1G010690/CsaV3_7G018620/CsaV3_1G039690
csv00250	Alanine, aspartate and glutamate metabolism	19/1171	53/4131	0.143548	0.715648	CsaV3_4G013270/CsaV3_1G000670/CsaV3_5G020650/CsaV3_5G031220/CsaV3_1G043170/CsaV3_4G007380/CsaV3_7G030560/CsaV3_1G013270/CsaV3_4G004380/CsaV3_4G026970/CsaV3_6G039090/CsaV3_4G004900/CsaV3_6G031950/CsaV3_3G004920/CsaV3_7G021350/CsaV3_1G039010/CsaV3_1G007880/CsaV3_5G017290/CsaV3_6G045440	CsaV3_4G013270/CsaV3_1G000670/CsaV3_5G020650/CsaV3_5G031220/CsaV3_1G043170/CsaV3_4G007380/CsaV3_7G030560/CsaV3_1G013270/CsaV3_4G004380/CsaV3_4G026970/CsaV3_6G039090/CsaV3_4G004900/CsaV3_6G031950/CsaV3_3G004920/CsaV3_7G021350/CsaV3_1G039010/CsaV3_1G007880/CsaV3_5G017290/CsaV3_6G045440	csv:101221948/csv:101215982/csv:101216119/csv:101220645/csv:101217893/csv:101220932/csv:101213413/csv:101217299/csv:101202786/csv:101210304/csv:101207975/csv:101208662/csv:101210280/csv:101220705/csv:101218056/csv:101208927/csv:101214440/csv:101208026/csv:101209128	19	13	CsaV3_4G013270/CsaV3_1G000670/CsaV3_5G020650/CsaV3_5G031220/CsaV3_4G007380/CsaV3_7G030560/CsaV3_1G013270/CsaV3_4G004380/CsaV3_4G026970/CsaV3_3G004920/CsaV3_7G021350/CsaV3_5G017290/CsaV3_6G045440	6	CsaV3_1G043170/CsaV3_6G039090/CsaV3_4G004900/CsaV3_6G031950/CsaV3_1G039010/CsaV3_1G007880
csv01230	Biosynthesis of amino acids	64/1171	201/4131	0.147791	0.715648	CsaV3_1G000670/CsaV3_5G028490/CsaV3_5G038370/CsaV3_5G031220/CsaV3_3G040500/CsaV3_1G000550/CsaV3_1G014510/CsaV3_7G022960/CsaV3_6G000650/CsaV3_6G040230/CsaV3_1G009420/CsaV3_2G011710/CsaV3_5G034910/CsaV3_3G043270/CsaV3_6G001210/CsaV3_7G030560/CsaV3_4G000040/CsaV3_2G001290/CsaV3_1G013270/CsaV3_2G017260/CsaV3_2G015280/CsaV3_6G040210/CsaV3_1G009410/CsaV3_4G017590/CsaV3_3G011200/CsaV3_5G027250/CsaV3_7G0…	CsaV3_1G000670/CsaV3_5G028490/CsaV3_5G038370/CsaV3_5G031220/CsaV3_3G040500/CsaV3_1G000550/CsaV3_1G014510/CsaV3_7G022960/CsaV3_6G000650/CsaV3_6G040230/CsaV3_1G009420/CsaV3_2G011710/CsaV3_5G034910/CsaV3_3G043270/CsaV3_6G001210/CsaV3_7G030560/CsaV3_4G000040/CsaV3_2G001290/CsaV3_1G013270/CsaV3_2G017260/CsaV3_2G015280/CsaV3_6G040210/CsaV3_1G009410/CsaV3_4G017590/CsaV3_3G011200/CsaV3_5G027250/CsaV3_7G0…	csv:101215982/csv:101212988/csv:101203315/csv:101220645/csv:101203129/csv:101213339/csv:101222151/csv:101215988/csv:101220896/csv:101205680/csv:101213319/csv:101215910/csv:101211316/csv:101222321/csv:101214545/csv:101213413/csv:101220786/csv:101208070/csv:101217299/csv:101209304/csv:101204323/csv:101205445/csv:101213074/csv:101216029/csv:101217323/csv:101202770/csv:101213467/csv:101207481/csv:101…	64	39	CsaV3_1G000670/CsaV3_5G028490/CsaV3_5G031220/CsaV3_3G040500/CsaV3_1G014510/CsaV3_7G022960/CsaV3_6G000650/CsaV3_1G009420/CsaV3_2G011710/CsaV3_3G043270/CsaV3_6G001210/CsaV3_7G030560/CsaV3_4G000040/CsaV3_1G013270/CsaV3_2G017260/CsaV3_1G009410/CsaV3_4G017590/CsaV3_6G047780/CsaV3_4G036570/CsaV3_4G000360/CsaV3_2G030460/CsaV3_1G008610/CsaV3_2G014950/CsaV3_6G001800/CsaV3_3G041150/CsaV3_4G013550/CsaV3_6G0…	25	CsaV3_5G038370/CsaV3_1G000550/CsaV3_6G040230/CsaV3_5G034910/CsaV3_2G001290/CsaV3_2G015280/CsaV3_6G040210/CsaV3_3G011200/CsaV3_5G027250/CsaV3_7G018620/CsaV3_2G003740/CsaV3_6G047510/CsaV3_6G031950/CsaV3_6G042420/CsaV3_2G034200/CsaV3_3G009790/CsaV3_1G039690/CsaV3_3G004760/CsaV3_1G005660/CsaV3_3G009570/CsaV3_6G021500/CsaV3_2G025820/CsaV3_7G006730/CsaV3_7G001970/CsaV3_4G031290
csv00900	Terpenoid backbone biosynthesis	17/1171	47/4131	0.150663	0.715648	CsaV3_1G001500/CsaV3_3G003490/CsaV3_2G009720/CsaV3_6G002810/CsaV3_3G020450/CsaV3_7G002460/CsaV3_6G005870/CsaV3_1G044500/CsaV3_3G006930/CsaV3_2G017600/CsaV3_7G021880/CsaV3_3G037160/CsaV3_4G007960/CsaV3_7G016180/CsaV3_6G018900/CsaV3_7G006800/CsaV3_7G002170	CsaV3_1G001500/CsaV3_3G003490/CsaV3_2G009720/CsaV3_6G002810/CsaV3_3G020450/CsaV3_7G002460/CsaV3_6G005870/CsaV3_1G044500/CsaV3_3G006930/CsaV3_2G017600/CsaV3_7G021880/CsaV3_3G037160/CsaV3_4G007960/CsaV3_7G016180/CsaV3_6G018900/CsaV3_7G006800/CsaV3_7G002170	csv:101207716/csv:101208259/csv:101208431/csv:101210090/csv:101206540/csv:101214645/csv:101223195/csv:101209923/csv:101218190/csv:101209799/csv:101204450/csv:101206885/csv:101214140/csv:101210057/csv:101213470/csv:101205649/csv:101219178	17	9	CsaV3_1G001500/CsaV3_3G003490/CsaV3_2G009720/CsaV3_6G002810/CsaV3_7G002460/CsaV3_1G044500/CsaV3_2G017600/CsaV3_7G021880/CsaV3_7G016180	8	CsaV3_3G020450/CsaV3_6G005870/CsaV3_3G006930/CsaV3_3G037160/CsaV3_4G007960/CsaV3_6G018900/CsaV3_7G006800/CsaV3_7G002170
csv00790	Folate biosynthesis	9/1171	23/4131	0.177564	0.80969	CsaV3_3G021950/CsaV3_5G037300/CsaV3_6G051460/CsaV3_6G038720/CsaV3_2G014940/CsaV3_4G033410/CsaV3_4G004540/CsaV3_7G025390/CsaV3_7G026240	CsaV3_3G021950/CsaV3_5G037300/CsaV3_6G051460/CsaV3_6G038720/CsaV3_2G014940/CsaV3_4G033410/CsaV3_4G004540/CsaV3_7G025390/CsaV3_7G026240	csv:101208344/csv:101209617/csv:101207464/csv:101223106/csv:101208660/csv:101212163/csv:101220531/csv:101210756/csv:101210466	9	5	CsaV3_6G051460/CsaV3_6G038720/CsaV3_2G014940/CsaV3_4G033410/CsaV3_4G004540	4	CsaV3_3G021950/CsaV3_5G037300/CsaV3_7G025390/CsaV3_7G026240
csv00071	Fatty acid degradation	17/1171	49/4131	0.20067	0.879859	CsaV3_2G011380/CsaV3_4G006560/CsaV3_7G002420/CsaV3_1G001600/CsaV3_2G014350/CsaV3_7G002460/CsaV3_3G013480/CsaV3_3G028760/CsaV3_2G034560/CsaV3_6G022310/CsaV3_7G024950/CsaV3_3G014880/CsaV3_6G025310/CsaV3_6G031750/CsaV3_5G004440/CsaV3_6G001070/CsaV3_UNG137080	CsaV3_2G011380/CsaV3_4G006560/CsaV3_7G002420/CsaV3_1G001600/CsaV3_2G014350/CsaV3_7G002460/CsaV3_3G013480/CsaV3_3G028760/CsaV3_2G034560/CsaV3_6G022310/CsaV3_7G024950/CsaV3_3G014880/CsaV3_6G025310/CsaV3_6G031750/CsaV3_5G004440/CsaV3_6G001070/CsaV3_UNG137080	csv:101212301/csv:101202800/csv:101212158/csv:101209430/csv:101203288/csv:101214645/csv:101207461/csv:101208182/csv:101220632/csv:101210295/csv:101209854/csv:101207559/csv:101218899/csv:101212881/csv:101222521/csv:101212704/csv:101218159	17	7	CsaV3_4G006560/CsaV3_1G001600/CsaV3_7G002460/CsaV3_3G028760/CsaV3_7G024950/CsaV3_3G014880/CsaV3_6G031750	10	CsaV3_2G011380/CsaV3_7G002420/CsaV3_2G014350/CsaV3_3G013480/CsaV3_2G034560/CsaV3_6G022310/CsaV3_6G025310/CsaV3_5G004440/CsaV3_6G001070/CsaV3_UNG137080
csv03040	Spliceosome	50/1171	159/4131	0.212108	0.895567	CsaV3_6G040490/CsaV3_2G032030/CsaV3_4G001320/CsaV3_3G011740/CsaV3_3G011750/CsaV3_7G024760/CsaV3_1G033610/CsaV3_2G016150/CsaV3_4G008320/CsaV3_5G024370/CsaV3_3G047170/CsaV3_5G031610/CsaV3_4G021980/CsaV3_1G014350/CsaV3_1G014490/CsaV3_2G006840/CsaV3_3G015880/CsaV3_2G009170/CsaV3_5G006650/CsaV3_5G039780/CsaV3_1G038750/CsaV3_7G023900/CsaV3_6G008590/CsaV3_6G040740/CsaV3_7G024630/CsaV3_1G014600/CsaV3_1G0…	CsaV3_6G040490/CsaV3_2G032030/CsaV3_4G001320/CsaV3_3G011740/CsaV3_3G011750/CsaV3_7G024760/CsaV3_1G033610/CsaV3_2G016150/CsaV3_4G008320/CsaV3_5G024370/CsaV3_3G047170/CsaV3_5G031610/CsaV3_4G021980/CsaV3_1G014350/CsaV3_1G014490/CsaV3_2G006840/CsaV3_3G015880/CsaV3_2G009170/CsaV3_5G006650/CsaV3_5G039780/CsaV3_1G038750/CsaV3_7G023900/CsaV3_6G008590/CsaV3_6G040740/CsaV3_7G024630/CsaV3_1G014600/CsaV3_1G0…	csv:101209779/csv:101217346/csv:101219042/csv:101204424/csv:101204424/csv:101212307/csv:101221953/csv:101220459/csv:101207569/csv:101211337/csv:101217802/csv:101214372/csv:101219553/csv:101219553/csv:101221685/csv:101208242/csv:101211027/csv:101215564/csv:101203903/csv:101222164/csv:101223011/csv:101216682/csv:101211412/csv:101214972/csv:101203991/csv:101203469/csv:101203955/csv:101213260/csv:101…	50	14	CsaV3_6G040490/CsaV3_2G032030/CsaV3_2G016150/CsaV3_5G024370/CsaV3_7G023900/CsaV3_6G040740/CsaV3_1G014600/CsaV3_2G032530/CsaV3_3G037500/CsaV3_5G026450/CsaV3_3G004310/CsaV3_1G031190/CsaV3_5G023770/CsaV3_2G002790	36	CsaV3_4G001320/CsaV3_3G011740/CsaV3_3G011750/CsaV3_7G024760/CsaV3_1G033610/CsaV3_4G008320/CsaV3_3G047170/CsaV3_5G031610/CsaV3_4G021980/CsaV3_1G014350/CsaV3_1G014490/CsaV3_2G006840/CsaV3_3G015880/CsaV3_2G009170/CsaV3_5G006650/CsaV3_5G039780/CsaV3_1G038750/CsaV3_6G008590/CsaV3_7G024630/CsaV3_1G001160/CsaV3_4G009520/CsaV3_7G030160/CsaV3_5G026520/CsaV3_4G004880/CsaV3_7G031820/CsaV3_UNG002030/CsaV3_3G…
csv04933	AGE-RAGE signaling pathway in diabetic complications	5/1171	11658	0.2337	0.901053	CsaV3_1G036210/CsaV3_2G002140/CsaV3_5G010130/CsaV3_2G016070/CsaV3_2G024270	CsaV3_1G036210/CsaV3_2G002140/CsaV3_5G010130/CsaV3_2G016070/CsaV3_2G024270	csv:101204232/csv:101209852/csv:101212421/csv:101219263/csv:101216083	5	5	CsaV3_1G036210/CsaV3_2G002140/CsaV3_5G010130/CsaV3_2G016070/CsaV3_2G024270	0
csv00280	Valine, leucine and isoleucine degradation	16/1171	47/4131	0.235835	0.901053	CsaV3_2G011380/CsaV3_1G041530/CsaV3_3G003490/CsaV3_7G007110/CsaV3_3G014830/CsaV3_4G026970/CsaV3_1G001600/CsaV3_7G002460/CsaV3_6G041570/CsaV3_6G038810/CsaV3_4G004900/CsaV3_3G028760/CsaV3_1G037300/CsaV3_3G014880/CsaV3_2G001870/CsaV3_2G025820	CsaV3_2G011380/CsaV3_1G041530/CsaV3_3G003490/CsaV3_7G007110/CsaV3_3G014830/CsaV3_4G026970/CsaV3_1G001600/CsaV3_7G002460/CsaV3_6G041570/CsaV3_6G038810/CsaV3_4G004900/CsaV3_3G028760/CsaV3_1G037300/CsaV3_3G014880/CsaV3_2G001870/CsaV3_2G025820	csv:101212301/csv:101216174/csv:101208259/csv:101204924/csv:101206829/csv:101210304/csv:101209430/csv:101214645/csv:101205130/csv:101203798/csv:101208662/csv:101208182/csv:101210819/csv:101207559/csv:101217826/csv:101214004	16	7	CsaV3_3G003490/CsaV3_4G026970/CsaV3_1G001600/CsaV3_7G002460/CsaV3_3G028760/CsaV3_3G014880/CsaV3_2G001870	9	CsaV3_2G011380/CsaV3_1G041530/CsaV3_7G007110/CsaV3_3G014830/CsaV3_6G041570/CsaV3_6G038810/CsaV3_4G004900/CsaV3_1G037300/CsaV3_2G025820
csv03008	Ribosome biogenesis in eukaryotes	26/1171	80/4131	0.237119	0.901053	CsaV3_1G029790/CsaV3_UNG219500/CsaV3_UNG136030/novel.634/CsaV3_1G039600/CsaV3_UNG009110/CsaV3_4G037990/CsaV3_1G029680/CsaV3_2G026240/CsaV3_1G005910/CsaV3_6G043510/CsaV3_2G004440/CsaV3_7G021670/CsaV3_6G008550/CsaV3_2G021160/CsaV3_4G004170/CsaV3_5G005970/CsaV3_6G046130/CsaV3_UNG096720/CsaV3_6G042250/CsaV3_3G049750/CsaV3_6G044000/CsaV3_3G003300/CsaV3_1G006340/CsaV3_1G007630/CsaV3_2G002790	CsaV3_1G029790/CsaV3_UNG219500/CsaV3_UNG136030/-/CsaV3_1G039600/CsaV3_UNG009110/CsaV3_4G037990/CsaV3_1G029680/CsaV3_2G026240/CsaV3_1G005910/CsaV3_6G043510/CsaV3_2G004440/CsaV3_7G021670/CsaV3_6G008550/CsaV3_2G021160/CsaV3_4G004170/CsaV3_5G005970/CsaV3_6G046130/CsaV3_UNG096720/CsaV3_6G042250/CsaV3_3G049750/CsaV3_6G044000/CsaV3_3G003300/CsaV3_1G006340/CsaV3_1G007630/CsaV3_2G002790	csv:101211465/csv:101217384/csv:101217384/csv:101221716/csv:101217092/csv:101217384/csv:101217384/csv:101211465/csv:101207500/csv:101222784/csv:101213034/csv:101217731/csv:101220903/csv:101220196/csv:101217384/csv:101214572/csv:101206527/csv:101217835/csv:101217384/csv:101208150/csv:101211694/csv:101205903/csv:101211928/csv:101208691/csv:101208620/csv:101222939	26	7	CsaV3_1G029790/CsaV3_1G039600/CsaV3_1G029680/CsaV3_3G049750/CsaV3_6G044000/CsaV3_1G006340/CsaV3_2G002790	19	CsaV3_UNG219500/CsaV3_UNG136030/novel.634/CsaV3_UNG009110/CsaV3_4G037990/CsaV3_2G026240/CsaV3_1G005910/CsaV3_6G043510/CsaV3_2G004440/CsaV3_7G021670/CsaV3_6G008550/CsaV3_2G021160/CsaV3_4G004170/CsaV3_5G005970/CsaV3_6G046130/CsaV3_UNG096720/CsaV3_6G042250/CsaV3_3G003300/CsaV3_1G007630
csv00640	Propanoate metabolism	13/1171	38/4131	0.261075	0.960082	CsaV3_1G041530/CsaV3_7G007110/CsaV3_4G008750/CsaV3_3G014830/CsaV3_7G002460/CsaV3_6G041570/CsaV3_1G046130/CsaV3_2G034560/CsaV3_1G007500/CsaV3_1G037300/CsaV3_5G023610/CsaV3_5G004440/CsaV3_UNG137080	CsaV3_1G041530/CsaV3_7G007110/CsaV3_4G008750/CsaV3_3G014830/CsaV3_7G002460/CsaV3_6G041570/CsaV3_1G046130/CsaV3_2G034560/CsaV3_1G007500/CsaV3_1G037300/CsaV3_5G023610/CsaV3_5G004440/CsaV3_UNG137080	csv:101216174/csv:101204924/csv:101222930/csv:101206829/csv:101214645/csv:101205130/csv:101205111/csv:101220632/csv:101206269/csv:101210819/csv:101212380/csv:101222521/csv:101218159	13	4	CsaV3_4G008750/CsaV3_7G002460/CsaV3_1G046130/CsaV3_1G007500	9	CsaV3_1G041530/CsaV3_7G007110/CsaV3_3G014830/CsaV3_6G041570/CsaV3_2G034560/CsaV3_1G037300/CsaV3_5G023610/CsaV3_5G004440/CsaV3_UNG137080
csv00450	Selenocompound metabolism	6/1171	16/4131	0.286649	0.989325	CsaV3_3G040500/CsaV3_3G000880/CsaV3_3G041150/CsaV3_2G013360/CsaV3_3G045740/CsaV3_3G043020	CsaV3_3G040500/CsaV3_3G000880/CsaV3_3G041150/CsaV3_2G013360/CsaV3_3G045740/CsaV3_3G043020	csv:101203129/csv:101214172/csv:101212851/csv:101218495/csv:101217416/csv:101222636	6	5	CsaV3_3G040500/CsaV3_3G041150/CsaV3_2G013360/CsaV3_3G045740/CsaV3_3G043020	1	CsaV3_3G000880
csv00750	Vitamin B6 metabolism	5/1171	13/4131	0.296707	0.989325	CsaV3_7G034880/CsaV3_2G001290/CsaV3_3G033790/CsaV3_3G047810/CsaV3_5G000200	CsaV3_7G034880/CsaV3_2G001290/CsaV3_3G033790/CsaV3_3G047810/CsaV3_5G000200	csv:101217360/csv:101208070/csv:101212698/csv:101207469/csv:101218000	5	1	CsaV3_7G034880	4	CsaV3_2G001290/CsaV3_3G033790/CsaV3_3G047810/CsaV3_5G000200
csv00630	Glyoxylate and dicarboxylate metabolism	21/1171	66/4131	0.305955	0.989325	CsaV3_1G009520/CsaV3_5G031220/CsaV3_2G011710/CsaV3_1G043170/CsaV3_7G030560/CsaV3_4G037250/CsaV3_6G028390/CsaV3_3G043780/CsaV3_3G015070/CsaV3_7G002460/CsaV3_5G034360/CsaV3_6G039090/CsaV3_6G044520/CsaV3_2G030460/CsaV3_6G047510/CsaV3_1G010620/CsaV3_3G043770/CsaV3_6G048160/CsaV3_6G051820/CsaV3_4G008360/CsaV3_1G002350	CsaV3_1G009520/CsaV3_5G031220/CsaV3_2G011710/CsaV3_1G043170/CsaV3_7G030560/CsaV3_4G037250/CsaV3_6G028390/CsaV3_3G043780/CsaV3_3G015070/CsaV3_7G002460/CsaV3_5G034360/CsaV3_6G039090/CsaV3_6G044520/CsaV3_2G030460/CsaV3_6G047510/CsaV3_1G010620/CsaV3_3G043770/CsaV3_6G048160/CsaV3_6G051820/CsaV3_4G008360/CsaV3_1G002350	csv:101214523/csv:101220645/csv:101215910/csv:101217893/csv:101213413/csv:101202931/csv:101214377/csv:101204237/csv:101209903/csv:101214645/csv:101219300/csv:101207975/csv:101219252/csv:101222345/csv:101217715/csv:101209820/csv:101203992/csv:101210494/csv:101215498/csv:101207078/csv:101213903	21	10	CsaV3_5G031220/CsaV3_2G011710/CsaV3_7G030560/CsaV3_6G028390/CsaV3_3G043780/CsaV3_7G002460/CsaV3_2G030460/CsaV3_1G010620/CsaV3_4G008360/CsaV3_1G002350	11	CsaV3_1G009520/CsaV3_1G043170/CsaV3_4G037250/CsaV3_3G015070/CsaV3_5G034360/CsaV3_6G039090/CsaV3_6G044520/CsaV3_6G047510/CsaV3_3G043770/CsaV3_6G048160/CsaV3_6G051820
csv00330	Arginine and proline metabolism	18/1171	56/4131	0.308197	0.989325	CsaV3_2G007750/CsaV3_2G001470/CsaV3_2G007760/CsaV3_3G020560/CsaV3_3G020550/CsaV3_4G007490/CsaV3_5G031670/CsaV3_1G013270/CsaV3_1G001600/CsaV3_4G014600/CsaV3_5G000580/CsaV3_3G028000/CsaV3_1G001620/CsaV3_1G015920/CsaV3_2G015820/CsaV3_3G013880/CsaV3_1G007880/CsaV3_1G015010	CsaV3_2G007750/CsaV3_2G001470/CsaV3_2G007760/CsaV3_3G020560/CsaV3_3G020550/CsaV3_4G007490/CsaV3_5G031670/CsaV3_1G013270/CsaV3_1G001600/CsaV3_4G014600/CsaV3_5G000580/CsaV3_3G028000/CsaV3_1G001620/CsaV3_1G015920/CsaV3_2G015820/CsaV3_3G013880/CsaV3_1G007880/CsaV3_1G015010	csv:101215844/csv:101205432/csv:101207514/csv:101207514/csv:101207514/csv:101213852/csv:101213410/csv:101217299/csv:101209430/csv:101217220/csv:101222254/csv:101212743/csv:101210007/csv:101207902/csv:101215057/csv:101213486/csv:101214440/csv:101207902	18	14	CsaV3_2G007750/CsaV3_2G001470/CsaV3_2G007760/CsaV3_3G020560/CsaV3_3G020550/CsaV3_5G031670/CsaV3_1G013270/CsaV3_1G001600/CsaV3_4G014600/CsaV3_5G000580/CsaV3_3G028000/CsaV3_1G001620/CsaV3_3G013880/CsaV3_1G015010	4	CsaV3_4G007490/CsaV3_1G015920/CsaV3_2G015820/CsaV3_1G007880
csv03015	mRNA surveillance pathway	30/1171	97/4131	0.319548	0.989325	CsaV3_5G024750/CsaV3_5G008430/CsaV3_2G032030/CsaV3_1G045580/CsaV3_2G002500/CsaV3_1G037380/CsaV3_6G045300/CsaV3_1G033610/CsaV3_4G024700/CsaV3_6G047060/CsaV3_6G001450/CsaV3_7G035250/CsaV3_1G037370/CsaV3_2G012690/CsaV3_6G004880/CsaV3_4G025970/CsaV3_7G031350/CsaV3_5G034150/CsaV3_1G004910/CsaV3_5G039520/CsaV3_3G018690/CsaV3_3G012160/CsaV3_3G022660/CsaV3_4G026290/CsaV3_5G024420/CsaV3_UNG186470/CsaV3_3G…	CsaV3_5G024750/CsaV3_5G008430/CsaV3_2G032030/CsaV3_1G045580/CsaV3_2G002500/CsaV3_1G037380/CsaV3_6G045300/CsaV3_1G033610/CsaV3_4G024700/CsaV3_6G047060/CsaV3_6G001450/CsaV3_7G035250/CsaV3_1G037370/CsaV3_2G012690/CsaV3_6G004880/CsaV3_4G025970/CsaV3_7G031350/CsaV3_5G034150/CsaV3_1G004910/CsaV3_5G039520/CsaV3_3G018690/CsaV3_3G012160/CsaV3_3G022660/CsaV3_4G026290/CsaV3_5G024420/CsaV3_UNG186470/CsaV3_3G…	csv:101204684/csv:101216915/csv:101217346/csv:101211261/csv:101206275/csv:101215977/csv:101206937/csv:101221953/csv:101218139/csv:101202819/csv:101209602/csv:101204291/csv:101215977/csv:101205600/csv:101219081/csv:101209960/csv:101222300/csv:101222376/csv:101210167/csv:101220043/csv:101216563/csv:101209828/csv:101217782/csv:101213136/csv:101211088/csv:101213308/csv:101202828/csv:101222664/csv:101…	30	14	CsaV3_5G024750/CsaV3_5G008430/CsaV3_2G032030/CsaV3_1G045580/CsaV3_2G002500/CsaV3_6G045300/CsaV3_4G024700/CsaV3_6G047060/CsaV3_2G012690/CsaV3_4G025970/CsaV3_1G004910/CsaV3_5G039520/CsaV3_3G012160/CsaV3_3G048300	16	CsaV3_1G037380/CsaV3_1G033610/CsaV3_6G001450/CsaV3_7G035250/CsaV3_1G037370/CsaV3_6G004880/CsaV3_7G031350/CsaV3_5G034150/CsaV3_3G018690/CsaV3_3G022660/CsaV3_4G026290/CsaV3_5G024420/CsaV3_UNG186470/CsaV3_3G031460/CsaV3_1G001420/CsaV3_1G043070
csv00410	beta-Alanine metabolism	14/1171	43/4131	0.321097	0.989325	CsaV3_2G001470/CsaV3_5G020650/CsaV3_4G007490/CsaV3_5G003800/CsaV3_5G003790/CsaV3_7G007110/CsaV3_1G001600/CsaV3_1G046130/CsaV3_2G034560/CsaV3_1G037300/CsaV3_1G001170/CsaV3_5G017290/CsaV3_5G004440/CsaV3_UNG137080	CsaV3_2G001470/CsaV3_5G020650/CsaV3_4G007490/CsaV3_5G003800/CsaV3_5G003790/CsaV3_7G007110/CsaV3_1G001600/CsaV3_1G046130/CsaV3_2G034560/CsaV3_1G037300/CsaV3_1G001170/CsaV3_5G017290/CsaV3_5G004440/CsaV3_UNG137080	csv:101205432/csv:101216119/csv:101213852/csv:101212818/csv:101213059/csv:101204924/csv:101209430/csv:101205111/csv:101220632/csv:101210819/csv:101204200/csv:101208026/csv:101222521/csv:101218159	14	8	CsaV3_2G001470/CsaV3_5G020650/CsaV3_5G003800/CsaV3_5G003790/CsaV3_1G001600/CsaV3_1G046130/CsaV3_1G001170/CsaV3_5G017290	6	CsaV3_4G007490/CsaV3_7G007110/CsaV3_2G034560/CsaV3_1G037300/CsaV3_5G004440/CsaV3_UNG137080
csv00230	Purine metabolism	26/1171	84/4131	0.33475	0.99998	CsaV3_3G007170/CsaV3_5G030450/CsaV3_4G000040/CsaV3_6G036560/CsaV3_1G010170/CsaV3_4G017590/CsaV3_7G008570/CsaV3_5G010490/CsaV3_3G013810/CsaV3_1G010130/CsaV3_5G002770/CsaV3_3G027630/CsaV3_7G023050/CsaV3_5G035210/CsaV3_4G000980/CsaV3_1G012190/CsaV3_2G013360/CsaV3_3G043750/CsaV3_2G026200/CsaV3_3G045740/CsaV3_2G010660/CsaV3_3G043250/CsaV3_2G013320/CsaV3_6G049150/CsaV3_6G042080/CsaV3_3G013820	CsaV3_3G007170/CsaV3_5G030450/CsaV3_4G000040/CsaV3_6G036560/CsaV3_1G010170/CsaV3_4G017590/CsaV3_7G008570/CsaV3_5G010490/CsaV3_3G013810/CsaV3_1G010130/CsaV3_5G002770/CsaV3_3G027630/CsaV3_7G023050/CsaV3_5G035210/CsaV3_4G000980/CsaV3_1G012190/CsaV3_2G013360/CsaV3_3G043750/CsaV3_2G026200/CsaV3_3G045740/CsaV3_2G010660/CsaV3_3G043250/CsaV3_2G013320/CsaV3_6G049150/CsaV3_6G042080/CsaV3_3G013820	csv:101217169/csv:101209590/csv:101220786/csv:101203595/csv:101206006/csv:101216029/csv:101205413/csv:101204076/csv:101212920/csv:101218785/csv:101217911/csv:101222416/csv:101217193/csv:101206975/csv:101213396/csv:101208006/csv:101218495/csv:101203747/csv:101208231/csv:101217416/csv:101203551/csv:101204776/csv:101218017/csv:101217089/csv:101210105/csv:105434415	26	17	CsaV3_3G007170/CsaV3_5G030450/CsaV3_4G000040/CsaV3_6G036560/CsaV3_1G010170/CsaV3_4G017590/CsaV3_1G010130/CsaV3_3G027630/CsaV3_5G035210/CsaV3_1G012190/CsaV3_2G013360/CsaV3_2G026200/CsaV3_3G045740/CsaV3_3G043250/CsaV3_2G013320/CsaV3_6G049150/CsaV3_6G042080	9	CsaV3_7G008570/CsaV3_5G010490/CsaV3_3G013810/CsaV3_5G002770/CsaV3_7G023050/CsaV3_4G000980/CsaV3_3G043750/CsaV3_2G010660/CsaV3_3G013820
csv00020	Citrate cycle (TCA cycle)	15/1171	47/4131	0.343736	0.99998	CsaV3_6G044640/CsaV3_5G026370/CsaV3_6G028390/CsaV3_5G027250/CsaV3_6G047780/CsaV3_6G044520/CsaV3_6G047510/CsaV3_5G007980/CsaV3_6G036340/CsaV3_1G007500/CsaV3_4G008360/CsaV3_6G039730/CsaV3_4G005080/CsaV3_1G002350/CsaV3_2G024770	CsaV3_6G044640/CsaV3_5G026370/CsaV3_6G028390/CsaV3_5G027250/CsaV3_6G047780/CsaV3_6G044520/CsaV3_6G047510/CsaV3_5G007980/CsaV3_6G036340/CsaV3_1G007500/CsaV3_4G008360/CsaV3_6G039730/CsaV3_4G005080/CsaV3_1G002350/CsaV3_2G024770	csv:101220209/csv:101208883/csv:101214377/csv:101202770/csv:101214612/csv:101219252/csv:101217715/csv:101222022/csv:101205918/csv:101206269/csv:101207078/csv:101219331/csv:101211616/csv:101213903/csv:101209126	15	12	CsaV3_6G044640/CsaV3_5G026370/CsaV3_6G028390/CsaV3_6G047780/CsaV3_5G007980/CsaV3_6G036340/CsaV3_1G007500/CsaV3_4G008360/CsaV3_6G039730/CsaV3_4G005080/CsaV3_1G002350/CsaV3_2G024770	3	CsaV3_5G027250/CsaV3_6G044520/CsaV3_6G047510
csv00620	Pyruvate metabolism	26/1171	85/4131	0.360781	0.99998	CsaV3_6G044640/CsaV3_1G009520/CsaV3_3G023610/CsaV3_4G002450/CsaV3_4G000040/CsaV3_7G035320/CsaV3_6G028390/CsaV3_4G017590/CsaV3_4G008750/CsaV3_3G015070/CsaV3_3G010370/CsaV3_1G001600/CsaV3_7G002460/CsaV3_5G035850/CsaV3_6G044520/CsaV3_6G036340/CsaV3_UNG009100/CsaV3_5G023610/CsaV3_3G005000/CsaV3_UNG082650/CsaV3_UNG071590/CsaV3_1G039740/CsaV3_4G008360/novel.1201/CsaV3_2G013320/CsaV3_1G002350	CsaV3_6G044640/CsaV3_1G009520/CsaV3_3G023610/CsaV3_4G002450/CsaV3_4G000040/CsaV3_7G035320/CsaV3_6G028390/CsaV3_4G017590/CsaV3_4G008750/CsaV3_3G015070/CsaV3_3G010370/CsaV3_1G001600/CsaV3_7G002460/CsaV3_5G035850/CsaV3_6G044520/CsaV3_6G036340/CsaV3_UNG009100/CsaV3_5G023610/CsaV3_3G005000/CsaV3_UNG082650/CsaV3_UNG071590/CsaV3_1G039740/CsaV3_4G008360/-/CsaV3_2G013320/CsaV3_1G002350	csv:101220209/csv:101214523/csv:101214108/csv:101223148/csv:101220786/csv:101214072/csv:101214377/csv:101216029/csv:101222930/csv:101209903/csv:101204181/csv:101209430/csv:101214645/csv:101211170/csv:101219252/csv:101205918/csv:101212275/csv:101212380/csv:101203268/csv:101212275/csv:101204181/csv:101219936/csv:101207078/csv:101204181/csv:101218017/csv:101213903	26	14	CsaV3_6G044640/CsaV3_4G002450/CsaV3_4G000040/CsaV3_6G028390/CsaV3_4G017590/CsaV3_4G008750/CsaV3_3G010370/CsaV3_1G001600/CsaV3_7G002460/CsaV3_6G036340/CsaV3_UNG071590/CsaV3_4G008360/CsaV3_2G013320/CsaV3_1G002350	12	CsaV3_1G009520/CsaV3_3G023610/CsaV3_7G035320/CsaV3_3G015070/CsaV3_5G035850/CsaV3_6G044520/CsaV3_UNG009100/CsaV3_5G023610/CsaV3_3G005000/CsaV3_UNG082650/CsaV3_1G039740/novel.1201
csv00590	Arachidonic acid metabolism	5/1171	14/4131	0.361948	0.99998	novel.773/CsaV3_5G026050/CsaV3_1G004390/CsaV3_4G027880/CsaV3_5G002890	-/CsaV3_5G026050/CsaV3_1G004390/CsaV3_4G027880/CsaV3_5G002890	csv:101222193/csv:101214564/csv:101221439/csv:101220288/csv:101220211	5	3	novel.773/CsaV3_5G026050/CsaV3_5G002890	2	CsaV3_1G004390/CsaV3_4G027880
csv00460	Cyanoamino acid metabolism	12/1171	38/4131	0.387108	0.99998	CsaV3_1G015110/CsaV3_6G000650/CsaV3_2G011710/CsaV3_3G043060/CsaV3_1G042470/CsaV3_2G030460/CsaV3_1G043200/CsaV3_1G004550/CsaV3_1G010960/CsaV3_5G035070/CsaV3_1G039010/CsaV3_2G015230	CsaV3_1G015110/CsaV3_6G000650/CsaV3_2G011710/CsaV3_3G043060/CsaV3_1G042470/CsaV3_2G030460/CsaV3_1G043200/CsaV3_1G004550/CsaV3_1G010960/CsaV3_5G035070/CsaV3_1G039010/CsaV3_2G015230	csv:101209360/csv:101220896/csv:101215910/csv:101223112/csv:101208027/csv:101222345/csv:101210312/csv:101204835/csv:101209136/csv:101209588/csv:101208927/csv:101211593	12	9	CsaV3_6G000650/CsaV3_2G011710/CsaV3_3G043060/CsaV3_1G042470/CsaV3_2G030460/CsaV3_1G004550/CsaV3_1G010960/CsaV3_5G035070/CsaV3_2G015230	3	CsaV3_1G015110/CsaV3_1G043200/CsaV3_1G039010
csv04626	Plant-pathogen interaction	43/1171	145/4131	0.392145	0.99998	CsaV3_6G022090/CsaV3_1G038710/CsaV3_7G008650/CsaV3_2G016890/CsaV3_6G051540/CsaV3_3G003840/CsaV3_3G017490/CsaV3_3G008110/CsaV3_4G027870/CsaV3_3G005100/CsaV3_5G002510/CsaV3_1G038860/CsaV3_1G000650/CsaV3_2G034220/CsaV3_6G039330/CsaV3_1G004720/CsaV3_3G012800/novel.399/CsaV3_5G033780/CsaV3_3G032970/CsaV3_3G028080/CsaV3_5G035130/CsaV3_4G006200/CsaV3_2G029200/CsaV3_5G000590/CsaV3_6G038920/CsaV3_7G030510…	CsaV3_6G022090/CsaV3_1G038710/CsaV3_7G008650/CsaV3_2G016890/CsaV3_6G051540/CsaV3_3G003840/CsaV3_3G017490/CsaV3_3G008110/CsaV3_4G027870/CsaV3_3G005100/CsaV3_5G002510/CsaV3_1G038860/CsaV3_1G000650/CsaV3_2G034220/CsaV3_6G039330/CsaV3_1G004720/CsaV3_3G012800/-/CsaV3_5G033780/CsaV3_3G032970/CsaV3_3G028080/CsaV3_5G035130/CsaV3_4G006200/CsaV3_2G029200/CsaV3_5G000590/CsaV3_6G038920/CsaV3_7G030510/CsaV3_5…	csv:101213216/csv:101221822/csv:101219869/csv:101205694/csv:101215973/csv:101207853/csv:101210914/csv:101206492/csv:101220235/csv:101215161/csv:101214254/csv:101206498/csv:101215508/csv:101209761/csv:101212721/csv:101207158/csv:101220878/csv:101206736/csv:101207390/csv:101220738/csv:101212985/csv:101208369/csv:101213932/csv:101210316/csv:101221781/csv:101205429/csv:101223136/csv:101203560/csv:101…	43	26	CsaV3_6G022090/CsaV3_1G038710/CsaV3_7G008650/CsaV3_2G016890/CsaV3_3G003840/CsaV3_3G017490/CsaV3_3G008110/CsaV3_3G005100/CsaV3_5G002510/CsaV3_1G038860/CsaV3_3G012800/novel.399/CsaV3_3G028080/CsaV3_4G006200/CsaV3_5G000590/CsaV3_6G038920/CsaV3_5G038390/CsaV3_7G003380/CsaV3_3G007660/CsaV3_3G043140/CsaV3_7G007620/CsaV3_3G010840/CsaV3_5G002350/CsaV3_3G010940/CsaV3_7G006290/CsaV3_3G005930	17	CsaV3_6G051540/CsaV3_4G027870/CsaV3_1G000650/CsaV3_2G034220/CsaV3_6G039330/CsaV3_1G004720/CsaV3_5G033780/CsaV3_3G032970/CsaV3_5G035130/CsaV3_2G029200/CsaV3_7G030510/CsaV3_4G011890/CsaV3_1G004290/CsaV3_3G017480/CsaV3_3G021210/CsaV3_4G027710/CsaV3_3G033350
csv00760	Nicotinate and nicotinamide metabolism	6/1171	18/4131	0.403583	0.99998	CsaV3_3G034830/CsaV3_1G042920/CsaV3_6G040600/CsaV3_2G002690/CsaV3_3G043750/CsaV3_2G016480	CsaV3_3G034830/CsaV3_1G042920/CsaV3_6G040600/CsaV3_2G002690/CsaV3_3G043750/CsaV3_2G016480	csv:101205253/csv:101214308/csv:101211263/csv:101203635/csv:101203747/csv:101210953	6	3	CsaV3_3G034830/CsaV3_6G040600/CsaV3_2G016480	3	CsaV3_1G042920/CsaV3_2G002690/CsaV3_3G043750
csv00350	Tyrosine metabolism	11/1171	35/4131	0.403934	0.99998	CsaV3_4G032000/CsaV3_5G003800/CsaV3_4G033420/CsaV3_4G008430/CsaV3_1G013270/CsaV3_5G003790/CsaV3_6G015190/CsaV3_4G000360/CsaV3_7G024950/CsaV3_1G001170/CsaV3_6G031750	CsaV3_4G032000/CsaV3_5G003800/CsaV3_4G033420/CsaV3_4G008430/CsaV3_1G013270/CsaV3_5G003790/CsaV3_6G015190/CsaV3_4G000360/CsaV3_7G024950/CsaV3_1G001170/CsaV3_6G031750	csv:101215051/csv:101212818/csv:101212407/csv:101206356/csv:101217299/csv:101213059/csv:101221092/csv:101212914/csv:101209854/csv:101204200/csv:101212881	11	8	CsaV3_5G003800/CsaV3_1G013270/CsaV3_5G003790/CsaV3_6G015190/CsaV3_4G000360/CsaV3_7G024950/CsaV3_1G001170/CsaV3_6G031750	3	CsaV3_4G032000/CsaV3_4G033420/CsaV3_4G008430
csv01212	Fatty acid metabolism	20/1171	66/4131	0.406718	0.99998	CsaV3_2G011380/CsaV3_4G006560/CsaV3_7G002420/CsaV3_4G008750/CsaV3_3G038870/CsaV3_2G014350/CsaV3_7G002460/CsaV3_3G013480/CsaV3_3G028760/CsaV3_2G034560/CsaV3_6G022310/CsaV3_5G004490/CsaV3_3G014880/CsaV3_5G023610/CsaV3_6G025310/CsaV3_5G004440/CsaV3_1G041340/CsaV3_6G001070/CsaV3_2G002490/CsaV3_UNG137080	CsaV3_2G011380/CsaV3_4G006560/CsaV3_7G002420/CsaV3_4G008750/CsaV3_3G038870/CsaV3_2G014350/CsaV3_7G002460/CsaV3_3G013480/CsaV3_3G028760/CsaV3_2G034560/CsaV3_6G022310/CsaV3_5G004490/CsaV3_3G014880/CsaV3_5G023610/CsaV3_6G025310/CsaV3_5G004440/CsaV3_1G041340/CsaV3_6G001070/CsaV3_2G002490/CsaV3_UNG137080	csv:101212301/csv:101202800/csv:101212158/csv:101222930/csv:101222623/csv:101203288/csv:101214645/csv:101207461/csv:101208182/csv:101220632/csv:101210295/csv:101222043/csv:101207559/csv:101212380/csv:101218899/csv:101222521/csv:101213530/csv:101212704/csv:101206509/csv:101218159	20	8	CsaV3_4G006560/CsaV3_4G008750/CsaV3_3G038870/CsaV3_7G002460/CsaV3_3G028760/CsaV3_5G004490/CsaV3_3G014880/CsaV3_2G002490	12	CsaV3_2G011380/CsaV3_7G002420/CsaV3_2G014350/CsaV3_3G013480/CsaV3_2G034560/CsaV3_6G022310/CsaV3_5G023610/CsaV3_6G025310/CsaV3_5G004440/CsaV3_1G041340/CsaV3_6G001070/CsaV3_UNG137080
csv00290	Valine, leucine and isoleucine biosynthesis	5/1171	15/4131	0.427417	0.99998	CsaV3_1G000550/CsaV3_6G040230/CsaV3_6G040210/CsaV3_3G011200/CsaV3_2G025820	CsaV3_1G000550/CsaV3_6G040230/CsaV3_6G040210/CsaV3_3G011200/CsaV3_2G025820	csv:101213339/csv:101205680/csv:101205445/csv:101217323/csv:101214004	5	0		5	CsaV3_1G000550/CsaV3_6G040230/CsaV3_6G040210/CsaV3_3G011200/CsaV3_2G025820
csv00600	Sphingolipid metabolism	7/1171	22/4131	0.436986	0.99998	CsaV3_6G048550/CsaV3_5G029190/CsaV3_5G014080/CsaV3_5G032610/CsaV3_1G035880/CsaV3_2G010670/CsaV3_5G039980	CsaV3_6G048550/CsaV3_5G029190/CsaV3_5G014080/CsaV3_5G032610/CsaV3_1G035880/CsaV3_2G010670/CsaV3_5G039980	csv:101205550/csv:101211924/csv:101212019/csv:101206018/csv:101209656/csv:101203795/csv:101204709	7	2	CsaV3_5G029190/CsaV3_1G035880	5	CsaV3_6G048550/CsaV3_5G014080/CsaV3_5G032610/CsaV3_2G010670/CsaV3_5G039980
csv00130	Ubiquinone and other terpenoid-quinone biosynthesis	13/1171	43/4131	0.448451	0.99998	CsaV3_3G005530/CsaV3_2G036010/CsaV3_6G046030/CsaV3_4G032000/CsaV3_4G033420/CsaV3_6G015190/CsaV3_2G036090/CsaV3_5G033620/CsaV3_6G052370/CsaV3_6G049520/CsaV3_7G031620/CsaV3_3G036010/CsaV3_5G031500	CsaV3_3G005530/CsaV3_2G036010/CsaV3_6G046030/CsaV3_4G032000/CsaV3_4G033420/CsaV3_6G015190/CsaV3_2G036090/CsaV3_5G033620/CsaV3_6G052370/CsaV3_6G049520/CsaV3_7G031620/CsaV3_3G036010/CsaV3_5G031500	csv:101209481/csv:101205148/csv:101216659/csv:101215051/csv:101212407/csv:101221092/csv:101221344/csv:101217012/csv:101212842/csv:101214126/csv:101218121/csv:101204417/csv:101216706	13	5	CsaV3_3G005530/CsaV3_6G015190/CsaV3_2G036090/CsaV3_6G052370/CsaV3_6G049520	8	CsaV3_2G036010/CsaV3_6G046030/CsaV3_4G032000/CsaV3_4G033420/CsaV3_5G033620/CsaV3_7G031620/CsaV3_3G036010/CsaV3_5G031500
csv00908	Zeatin biosynthesis	6/1171	19/4131	0.462054	0.99998	CsaV3_7G028650/CsaV3_5G006200/CsaV3_4G036030/CsaV3_4G028960/CsaV3_6G003310/CsaV3_1G040510	CsaV3_7G028650/CsaV3_5G006200/CsaV3_4G036030/CsaV3_4G028960/CsaV3_6G003310/CsaV3_1G040510	csv:101217256/csv:101205347/csv:101217899/csv:101210219/csv:101209073/csv:101207014	6	3	CsaV3_7G028650/CsaV3_4G028960/CsaV3_6G003310	3	CsaV3_5G006200/CsaV3_4G036030/CsaV3_1G040510
csv00100	Steroid biosynthesis	8/1171	26/4131	0.464898	0.99998	CsaV3_4G009240/CsaV3_3G032020/CsaV3_6G051670/CsaV3_2G015210/CsaV3_3G027160/CsaV3_7G030530/CsaV3_3G032010/CsaV3_4G027880	CsaV3_4G009240/CsaV3_3G032020/CsaV3_6G051670/CsaV3_2G015210/CsaV3_3G027160/CsaV3_7G030530/CsaV3_3G032010/CsaV3_4G027880	csv:101217570/csv:101217389/csv:101221194/csv:101205767/csv:101217446/csv:101213648/csv:101217151/csv:101220288	8	5	CsaV3_4G009240/CsaV3_3G032020/CsaV3_6G051670/CsaV3_2G015210/CsaV3_3G032010	3	CsaV3_3G027160/CsaV3_7G030530/CsaV3_4G027880
csv03030	DNA replication	12/1171	40/4131	0.467349	0.99998	CsaV3_6G038660/CsaV3_3G010270/CsaV3_1G006150/CsaV3_2G003500/CsaV3_6G046400/CsaV3_5G005690/CsaV3_1G032270/CsaV3_5G039570/CsaV3_6G053180/CsaV3_1G031640/CsaV3_7G000210/CsaV3_4G028050	CsaV3_6G038660/CsaV3_3G010270/CsaV3_1G006150/CsaV3_2G003500/CsaV3_6G046400/CsaV3_5G005690/CsaV3_1G032270/CsaV3_5G039570/CsaV3_6G053180/CsaV3_1G031640/CsaV3_7G000210/CsaV3_4G028050	csv:101204361/csv:101220726/csv:101206268/csv:101211822/csv:101218071/csv:101209940/csv:101207444/csv:101203146/csv:101219775/csv:101219981/csv:101211850/csv:101221224	12	9	CsaV3_3G010270/CsaV3_1G006150/CsaV3_2G003500/CsaV3_5G005690/CsaV3_1G032270/CsaV3_5G039570/CsaV3_6G053180/CsaV3_1G031640/CsaV3_7G000210	3	CsaV3_6G038660/CsaV3_6G046400/CsaV3_4G028050
csv00030	Pentose phosphate pathway	14/1171	47/4131	0.467857	0.99998	CsaV3_5G028490/CsaV3_5G034910/CsaV3_4G006330/CsaV3_6G004010/CsaV3_2G015280/CsaV3_4G025880/CsaV3_2G003650/CsaV3_2G034200/CsaV3_3G009790/CsaV3_4G037690/CsaV3_5G033390/CsaV3_1G005660/CsaV3_2G028640/CsaV3_4G007980	CsaV3_5G028490/CsaV3_5G034910/CsaV3_4G006330/CsaV3_6G004010/CsaV3_2G015280/CsaV3_4G025880/CsaV3_2G003650/CsaV3_2G034200/CsaV3_3G009790/CsaV3_4G037690/CsaV3_5G033390/CsaV3_1G005660/CsaV3_2G028640/CsaV3_4G007980	csv:101212988/csv:101211316/csv:101206171/csv:101205576/csv:101204323/csv:101211927/csv:101208699/csv:101209273/csv:101215805/csv:101208728/csv:101210739/csv:101219871/csv:101217944/csv:101213654	14	4	CsaV3_5G028490/CsaV3_4G006330/CsaV3_4G037690/CsaV3_2G028640	10	CsaV3_5G034910/CsaV3_6G004010/CsaV3_2G015280/CsaV3_4G025880/CsaV3_2G003650/CsaV3_2G034200/CsaV3_3G009790/CsaV3_5G033390/CsaV3_1G005660/CsaV3_4G007980
csv00592	alpha-Linolenic acid metabolism	17/1171	58/4131	0.484829	0.99998	CsaV3_2G011380/CsaV3_7G010170/CsaV3_2G033050/CsaV3_5G035840/CsaV3_7G010160/CsaV3_2G028330/CsaV3_3G000680/CsaV3_3G028760/CsaV3_2G034560/CsaV3_6G022310/CsaV3_7G024950/CsaV3_4G027880/CsaV3_6G025310/CsaV3_7G026290/CsaV3_5G004440/CsaV3_7G034390/CsaV3_UNG137080	CsaV3_2G011380/CsaV3_7G010170/CsaV3_2G033050/CsaV3_5G035840/CsaV3_7G010160/CsaV3_2G028330/CsaV3_3G000680/CsaV3_3G028760/CsaV3_2G034560/CsaV3_6G022310/CsaV3_7G024950/CsaV3_4G027880/CsaV3_6G025310/CsaV3_7G026290/CsaV3_5G004440/CsaV3_7G034390/CsaV3_UNG137080	csv:101212301/csv:101211574/csv:101203714/csv:101206690/csv:101211324/csv:101221732/csv:101211109/csv:101208182/csv:101220632/csv:101210295/csv:101209854/csv:101220288/csv:101218899/csv:101209067/csv:101222521/csv:101204952/csv:101218159	17	6	CsaV3_7G010170/CsaV3_2G033050/CsaV3_5G035840/CsaV3_7G010160/CsaV3_3G028760/CsaV3_7G024950	11	CsaV3_2G011380/CsaV3_2G028330/CsaV3_3G000680/CsaV3_2G034560/CsaV3_6G022310/CsaV3_4G027880/CsaV3_6G025310/CsaV3_7G026290/CsaV3_5G004440/CsaV3_7G034390/CsaV3_UNG137080
csv00511	Other glycan degradation	5/1171	16/4131	0.491403	0.99998	CsaV3_5G010510/CsaV3_6G047280/CsaV3_5G014080/CsaV3_5G001420/CsaV3_5G039980	CsaV3_5G010510/CsaV3_6G047280/CsaV3_5G014080/CsaV3_5G001420/CsaV3_5G039980	csv:101203587/csv:101221354/csv:101212019/csv:101211186/csv:101204709	5	2	CsaV3_5G010510/CsaV3_5G001420	3	CsaV3_6G047280/CsaV3_5G014080/CsaV3_5G039980
csv00260	Glycine, serine and threonine metabolism	20/1171	69/4131	0.498794	0.99998	CsaV3_5G031220/CsaV3_6G040230/CsaV3_2G011710/CsaV3_1G043170/CsaV3_3G043270/CsaV3_5G003800/CsaV3_2G001290/CsaV3_2G017260/CsaV3_5G003790/CsaV3_6G040210/CsaV3_4G026970/CsaV3_2G003740/CsaV3_6G039090/CsaV3_2G030460/CsaV3_4G004900/CsaV3_1G010620/CsaV3_4G013550/CsaV3_UNG227830/CsaV3_1G001170/CsaV3_7G001970	CsaV3_5G031220/CsaV3_6G040230/CsaV3_2G011710/CsaV3_1G043170/CsaV3_3G043270/CsaV3_5G003800/CsaV3_2G001290/CsaV3_2G017260/CsaV3_5G003790/CsaV3_6G040210/CsaV3_4G026970/CsaV3_2G003740/CsaV3_6G039090/CsaV3_2G030460/CsaV3_4G004900/CsaV3_1G010620/CsaV3_4G013550/CsaV3_UNG227830/CsaV3_1G001170/CsaV3_7G001970	csv:101220645/csv:101205680/csv:101215910/csv:101217893/csv:101222321/csv:101212818/csv:101208070/csv:101209304/csv:101213059/csv:101205445/csv:101210304/csv:101207481/csv:101207975/csv:101222345/csv:101208662/csv:101209820/csv:101217925/csv:101219910/csv:101204200/csv:101222129	20	12	CsaV3_5G031220/CsaV3_2G011710/CsaV3_3G043270/CsaV3_5G003800/CsaV3_2G017260/CsaV3_5G003790/CsaV3_4G026970/CsaV3_2G030460/CsaV3_1G010620/CsaV3_4G013550/CsaV3_UNG227830/CsaV3_1G001170	8	CsaV3_6G040230/CsaV3_1G043170/CsaV3_2G001290/CsaV3_6G040210/CsaV3_2G003740/CsaV3_6G039090/CsaV3_4G004900/CsaV3_7G001970
csv00061	Fatty acid biosynthesis	10/1171	34/4131	0.509977	0.99998	CsaV3_4G006560/CsaV3_7G002420/CsaV3_4G008750/CsaV3_2G014350/CsaV3_3G013480/CsaV3_5G023610/CsaV3_7G026160/CsaV3_1G041340/CsaV3_6G001070/CsaV3_2G002490	CsaV3_4G006560/CsaV3_7G002420/CsaV3_4G008750/CsaV3_2G014350/CsaV3_3G013480/CsaV3_5G023610/CsaV3_7G026160/CsaV3_1G041340/CsaV3_6G001070/CsaV3_2G002490	csv:101202800/csv:101212158/csv:101222930/csv:101203288/csv:101207461/csv:101212380/csv:101221530/csv:101213530/csv:101212704/csv:101206509	10	4	CsaV3_4G006560/CsaV3_4G008750/CsaV3_7G026160/CsaV3_2G002490	6	CsaV3_7G002420/CsaV3_2G014350/CsaV3_3G013480/CsaV3_5G023610/CsaV3_1G041340/CsaV3_6G001070
csv04120	Ubiquitin mediated proteolysis	28/1171	98/4131	0.519046	0.99998	CsaV3_6G028570/CsaV3_6G040090/CsaV3_5G032430/CsaV3_6G013200/CsaV3_5G025240/CsaV3_4G005420/CsaV3_3G011740/CsaV3_2G016190/CsaV3_3G011750/CsaV3_7G023260/CsaV3_3G019890/CsaV3_4G008040/CsaV3_6G039130/CsaV3_2G001130/CsaV3_5G010260/CsaV3_5G002220/CsaV3_3G019900/CsaV3_6G031140/CsaV3_6G042460/CsaV3_3G042790/CsaV3_3G046770/CsaV3_4G030530/CsaV3_6G000010/novel.793/CsaV3_5G003380/CsaV3_3G014220/CsaV3_4G027690…	CsaV3_6G028570/CsaV3_6G040090/CsaV3_5G032430/CsaV3_6G013200/CsaV3_5G025240/CsaV3_4G005420/CsaV3_3G011740/CsaV3_2G016190/CsaV3_3G011750/CsaV3_7G023260/CsaV3_3G019890/CsaV3_4G008040/CsaV3_6G039130/CsaV3_2G001130/CsaV3_5G010260/CsaV3_5G002220/CsaV3_3G019900/CsaV3_6G031140/CsaV3_6G042460/CsaV3_3G042790/CsaV3_3G046770/CsaV3_4G030530/CsaV3_6G000010/-/CsaV3_5G003380/CsaV3_3G014220/CsaV3_4G027690/CsaV3_5…	csv:101221014/csv:101203488/csv:101223010/csv:101220979/csv:101206294/csv:101202936/csv:101204424/csv:101220698/csv:101204424/csv:101214340/csv:101215696/csv:101212453/csv:101208947/csv:101209687/csv:101222904/csv:101210687/csv:105434867/csv:101220292/csv:101205966/csv:101218217/csv:101203062/csv:101217217/csv:101218340/csv:101218340/csv:101220762/csv:101219616/csv:101205676/csv:101220694	28	13	CsaV3_6G028570/CsaV3_6G013200/CsaV3_5G025240/CsaV3_4G005420/CsaV3_4G008040/CsaV3_6G039130/CsaV3_2G001130/CsaV3_6G042460/CsaV3_6G000010/novel.793/CsaV3_5G003380/CsaV3_4G027690/CsaV3_5G000720	15	CsaV3_6G040090/CsaV3_5G032430/CsaV3_3G011740/CsaV3_2G016190/CsaV3_3G011750/CsaV3_7G023260/CsaV3_3G019890/CsaV3_5G010260/CsaV3_5G002220/CsaV3_3G019900/CsaV3_6G031140/CsaV3_3G042790/CsaV3_3G046770/CsaV3_4G030530/CsaV3_3G014220
csv00520	Amino sugar and nucleotide sugar metabolism	33/1171	116/4131	0.526137	0.99998	CsaV3_7G002310/CsaV3_2G014910/CsaV3_5G008090/CsaV3_3G020950/CsaV3_1G037730/CsaV3_5G027030/CsaV3_1G006170/CsaV3_5G003160/CsaV3_3G045370/CsaV3_2G007810/CsaV3_6G033720/CsaV3_5G026440/CsaV3_6G014590/CsaV3_1G028640/CsaV3_3G016290/CsaV3_3G009370/CsaV3_4G006660/CsaV3_6G023940/CsaV3_7G006230/CsaV3_4G010130/CsaV3_1G038770/CsaV3_2G011740/CsaV3_4G009070/CsaV3_5G001840/CsaV3_2G001860/CsaV3_2G002740/CsaV3_3G0…	CsaV3_7G002310/CsaV3_2G014910/CsaV3_5G008090/CsaV3_3G020950/CsaV3_1G037730/CsaV3_5G027030/CsaV3_1G006170/CsaV3_5G003160/CsaV3_3G045370/CsaV3_2G007810/CsaV3_6G033720/CsaV3_5G026440/CsaV3_6G014590/CsaV3_1G028640/CsaV3_3G016290/CsaV3_3G009370/CsaV3_4G006660/CsaV3_6G023940/CsaV3_7G006230/CsaV3_4G010130/CsaV3_1G038770/CsaV3_2G011740/CsaV3_4G009070/CsaV3_5G001840/CsaV3_2G001860/CsaV3_2G002740/CsaV3_3G0…	csv:101216573/csv:101208904/csv:101219906/csv:101223130/csv:101214131/csv:101220205/csv:101203952/csv:101203400/csv:101221562/csv:101214888/csv:101221070/csv:101210360/csv:101202932/csv:101214415/csv:101209058/csv:101208525/csv:101209558/csv:101222435/csv:101216143/csv:101207713/csv:101222058/csv:101216154/csv:101218758/csv:101205820/csv:101218300/csv:101223173/csv:101209165/csv:101217944/csv:101…	33	22	CsaV3_7G002310/CsaV3_2G014910/CsaV3_1G037730/CsaV3_1G006170/CsaV3_3G045370/CsaV3_6G033720/CsaV3_5G026440/CsaV3_6G014590/CsaV3_1G028640/CsaV3_3G009370/CsaV3_4G006660/CsaV3_7G006230/CsaV3_4G010130/CsaV3_1G038770/CsaV3_2G011740/CsaV3_5G001840/CsaV3_2G002740/CsaV3_2G028640/CsaV3_3G037280/CsaV3_2G024360/CsaV3_1G032190/CsaV3_6G032500	11	CsaV3_5G008090/CsaV3_3G020950/CsaV3_5G027030/CsaV3_5G003160/CsaV3_2G007810/CsaV3_3G016290/CsaV3_6G023940/CsaV3_4G009070/CsaV3_2G001860/CsaV3_3G008490/CsaV3_6G015080
csv04075	Plant hormone signal transduction	60/1171	212/4131	0.533058	0.99998	CsaV3_3G023380/CsaV3_2G016930/CsaV3_5G028350/CsaV3_2G002930/CsaV3_2G033550/CsaV3_7G027610/CsaV3_2G025170/CsaV3_1G034580/CsaV3_6G044680/CsaV3_3G016530/CsaV3_3G048460/CsaV3_7G000720/CsaV3_2G013230/CsaV3_3G014010/CsaV3_1G030930/CsaV3_3G001710/CsaV3_7G027600/CsaV3_3G018080/CsaV3_5G008910/CsaV3_6G004610/CsaV3_2G032070/CsaV3_6G008270/CsaV3_3G033450/CsaV3_3G043720/CsaV3_1G014770/CsaV3_6G005590/CsaV3_2G0…	CsaV3_3G023380/CsaV3_2G016930/CsaV3_5G028350/CsaV3_2G002930/CsaV3_2G033550/CsaV3_7G027610/CsaV3_2G025170/CsaV3_1G034580/CsaV3_6G044680/CsaV3_3G016530/CsaV3_3G048460/CsaV3_7G000720/CsaV3_2G013230/CsaV3_3G014010/CsaV3_1G030930/CsaV3_3G001710/CsaV3_7G027600/CsaV3_3G018080/CsaV3_5G008910/CsaV3_6G004610/CsaV3_2G032070/CsaV3_6G008270/CsaV3_3G033450/CsaV3_3G043720/CsaV3_1G014770/CsaV3_6G005590/CsaV3_2G0…	csv:101219992/csv:101206398/csv:101204164/csv:101220113/csv:101217648/csv:101219427/csv:101204370/csv:101206871/csv:101221152/csv:101206634/csv:101219386/csv:101204304/csv:101204324/csv:101215807/csv:101210711/csv:101205372/csv:101218948/csv:101203475/csv:101209478/csv:101214396/csv:101216639/csv:101216313/csv:101206842/csv:101203499/csv:101204604/csv:101216841/csv:101223043/csv:101220018/csv:101…	60	36	CsaV3_3G023380/CsaV3_2G016930/CsaV3_5G028350/CsaV3_2G002930/CsaV3_2G033550/CsaV3_7G027610/CsaV3_2G025170/CsaV3_6G044680/CsaV3_3G048460/CsaV3_7G000720/CsaV3_3G014010/CsaV3_1G030930/CsaV3_7G027600/CsaV3_5G008910/CsaV3_6G004610/CsaV3_3G033450/CsaV3_1G014770/CsaV3_6G005590/CsaV3_6G050480/CsaV3_3G011620/CsaV3_3G001740/CsaV3_3G007730/CsaV3_6G015010/CsaV3_3G046430/CsaV3_6G045260/CsaV3_5G002850/CsaV3_7G0…	24	CsaV3_1G034580/CsaV3_3G016530/CsaV3_2G013230/CsaV3_3G001710/CsaV3_3G018080/CsaV3_2G032070/CsaV3_6G008270/CsaV3_3G043720/CsaV3_2G026630/CsaV3_3G002220/CsaV3_3G027970/CsaV3_2G004120/CsaV3_UNG033160/CsaV3_1G041950/CsaV3_5G024480/CsaV3_6G005170/CsaV3_3G022000/CsaV3_4G030060/CsaV3_6G001990/CsaV3_6G013600/CsaV3_4G029770/novel.741/CsaV3_4G030050/CsaV3_4G004890
csv03022	Basal transcription factors	10/1171	35/4131	0.552394	0.99998	CsaV3_4G027560/CsaV3_1G004160/CsaV3_3G003270/CsaV3_3G028740/CsaV3_2G033370/CsaV3_6G039860/CsaV3_4G028940/CsaV3_7G034500/CsaV3_1G041520/CsaV3_5G025800	CsaV3_4G027560/CsaV3_1G004160/CsaV3_3G003270/CsaV3_3G028740/CsaV3_2G033370/CsaV3_6G039860/CsaV3_4G028940/CsaV3_7G034500/CsaV3_1G041520/CsaV3_5G025800	csv:101203811/csv:101217645/csv:101204877/csv:101207693/csv:101219951/csv:101222808/csv:101209725/csv:101211341/csv:101216807/csv:101212641	10	4	CsaV3_1G004160/CsaV3_2G033370/CsaV3_7G034500/CsaV3_5G025800	6	CsaV3_4G027560/CsaV3_3G003270/CsaV3_3G028740/CsaV3_6G039860/CsaV3_4G028940/CsaV3_1G041520
csv00910	Nitrogen metabolism	8/1171	28/4131	0.561044	0.99998	CsaV3_4G013270/CsaV3_2G030320/CsaV3_7G030560/CsaV3_5G031570/CsaV3_4G004380/CsaV3_3G011860/CsaV3_3G042440/CsaV3_4G014780	CsaV3_4G013270/CsaV3_2G030320/CsaV3_7G030560/CsaV3_5G031570/CsaV3_4G004380/CsaV3_3G011860/CsaV3_3G042440/CsaV3_4G014780	csv:101221948/csv:101212995/csv:101213413/csv:101215090/csv:101202786/csv:101205401/csv:101213998/csv:101214659	8	6	CsaV3_4G013270/CsaV3_7G030560/CsaV3_4G004380/CsaV3_3G011860/CsaV3_3G042440/CsaV3_4G014780	2	CsaV3_2G030320/CsaV3_5G031570
csv01040	Biosynthesis of unsaturated fatty acids	6/1171	21/4131	0.573264	0.99998	CsaV3_2G011380/CsaV3_3G038870/CsaV3_3G028760/CsaV3_2G034560/CsaV3_5G004440/CsaV3_UNG137080	CsaV3_2G011380/CsaV3_3G038870/CsaV3_3G028760/CsaV3_2G034560/CsaV3_5G004440/CsaV3_UNG137080	csv:101212301/csv:101222623/csv:101208182/csv:101220632/csv:101222521/csv:101218159	6	2	CsaV3_3G038870/CsaV3_3G028760	4	CsaV3_2G011380/CsaV3_2G034560/CsaV3_5G004440/CsaV3_UNG137080
csv00905	Brassinosteroid biosynthesis	4/1171	14/4131	0.592913	0.99998	CsaV3_6G046740/CsaV3_1G029710/CsaV3_5G033450/CsaV3_5G033460	CsaV3_6G046740/CsaV3_1G029710/CsaV3_5G033450/CsaV3_5G033460	csv:101203911/csv:101213466/csv:101219383/csv:101219145	4	0		4	CsaV3_6G046740/CsaV3_1G029710/CsaV3_5G033450/CsaV3_5G033460
csv00860	Porphyrin and chlorophyll metabolism	12/1171	44/4131	0.619742	0.99998	CsaV3_2G033150/CsaV3_1G024260/CsaV3_2G016730/CsaV3_1G014120/CsaV3_1G030090/CsaV3_4G033870/CsaV3_6G001080/CsaV3_7G002150/CsaV3_1G038230/CsaV3_1G000080/CsaV3_7G007370/CsaV3_6G039120	CsaV3_2G033150/CsaV3_1G024260/CsaV3_2G016730/CsaV3_1G014120/CsaV3_1G030090/CsaV3_4G033870/CsaV3_6G001080/CsaV3_7G002150/CsaV3_1G038230/CsaV3_1G000080/CsaV3_7G007370/CsaV3_6G039120	csv:101222312/csv:101222986/csv:101202861/csv:101217499/csv:101214191/csv:101208554/csv:101213181/csv:101212759/csv:101218513/csv:101206600/csv:101208135/csv:101208461	12	3	CsaV3_2G016730/CsaV3_4G033870/CsaV3_1G038230	9	CsaV3_2G033150/CsaV3_1G024260/CsaV3_1G014120/CsaV3_1G030090/CsaV3_6G001080/CsaV3_7G002150/CsaV3_1G000080/CsaV3_7G007370/CsaV3_6G039120
csv04070	Phosphatidylinositol signaling system	15/1171	55/4131	0.621275	0.99998	CsaV3_2G036570/CsaV3_2G036580/CsaV3_7G033950/CsaV3_1G036210/CsaV3_2G014560/CsaV3_5G010130/CsaV3_5G037840/CsaV3_3G036240/CsaV3_2G014550/CsaV3_3G005860/CsaV3_3G048980/CsaV3_6G037410/CsaV3_5G023290/CsaV3_1G018390/CsaV3_4G028490	CsaV3_2G036570/CsaV3_2G036580/CsaV3_7G033950/CsaV3_1G036210/CsaV3_2G014560/CsaV3_5G010130/CsaV3_5G037840/CsaV3_3G036240/CsaV3_2G014550/CsaV3_3G005860/CsaV3_3G048980/CsaV3_6G037410/CsaV3_5G023290/CsaV3_1G018390/CsaV3_4G028490	csv:101218009/csv:101223134/csv:101211666/csv:101204232/csv:101214424/csv:101212421/csv:101210866/csv:101203066/csv:101214424/csv:101208743/csv:101211396/csv:101215596/csv:101219958/csv:101213706/csv:101208830	15	12	CsaV3_2G036570/CsaV3_2G036580/CsaV3_7G033950/CsaV3_1G036210/CsaV3_2G014560/CsaV3_5G010130/CsaV3_3G036240/CsaV3_2G014550/CsaV3_3G048980/CsaV3_6G037410/CsaV3_5G023290/CsaV3_1G018390	3	CsaV3_5G037840/CsaV3_3G005860/CsaV3_4G028490
csv00052	Galactose metabolism	13/1171	48/4131	0.631418	0.99998	CsaV3_1G046750/CsaV3_3G037440/CsaV3_5G003160/CsaV3_4G011820/CsaV3_5G029190/CsaV3_3G009370/CsaV3_4G006660/CsaV3_1G026710/CsaV3_3G042690/CsaV3_5G001840/CsaV3_2G001860/CsaV3_2G024360/CsaV3_1G015730	CsaV3_1G046750/CsaV3_3G037440/CsaV3_5G003160/CsaV3_4G011820/CsaV3_5G029190/CsaV3_3G009370/CsaV3_4G006660/CsaV3_1G026710/CsaV3_3G042690/CsaV3_5G001840/CsaV3_2G001860/CsaV3_2G024360/CsaV3_1G015730	csv:101216685/csv:101223138/csv:101203400/csv:101211538/csv:101211924/csv:101208525/csv:101209558/csv:101203037/csv:101217277/csv:101205820/csv:101218300/csv:101214883/csv:101215109	13	8	CsaV3_1G046750/CsaV3_3G037440/CsaV3_4G011820/CsaV3_5G029190/CsaV3_3G009370/CsaV3_4G006660/CsaV3_5G001840/CsaV3_2G024360	5	CsaV3_5G003160/CsaV3_1G026710/CsaV3_3G042690/CsaV3_2G001860/CsaV3_1G015730
csv00010	Glycolysis / Gluconeogenesis	30/1171	110/4131	0.635859	0.99998	CsaV3_6G044640/CsaV3_7G022960/CsaV3_1G009420/CsaV3_3G008370/CsaV3_6G001210/CsaV3_4G000040/CsaV3_6G004010/CsaV3_2G017260/CsaV3_2G015280/CsaV3_4G025880/CsaV3_2G008560/CsaV3_1G009410/CsaV3_4G017590/CsaV3_2G003650/CsaV3_3G015070/CsaV3_1G001600/CsaV3_4G006350/CsaV3_6G050730/CsaV3_6G036340/CsaV3_3G033310/CsaV3_4G037690/CsaV3_4G013550/CsaV3_6G040390/CsaV3_7G024950/CsaV3_2G001860/CsaV3_2G028640/CsaV3_5G0…	CsaV3_6G044640/CsaV3_7G022960/CsaV3_1G009420/CsaV3_3G008370/CsaV3_6G001210/CsaV3_4G000040/CsaV3_6G004010/CsaV3_2G017260/CsaV3_2G015280/CsaV3_4G025880/CsaV3_2G008560/CsaV3_1G009410/CsaV3_4G017590/CsaV3_2G003650/CsaV3_3G015070/CsaV3_1G001600/CsaV3_4G006350/CsaV3_6G050730/CsaV3_6G036340/CsaV3_3G033310/CsaV3_4G037690/CsaV3_4G013550/CsaV3_6G040390/CsaV3_7G024950/CsaV3_2G001860/CsaV3_2G028640/CsaV3_5G0…	csv:101220209/csv:101215988/csv:101213319/csv:101213965/csv:101214545/csv:101220786/csv:101205576/csv:101209304/csv:101204323/csv:101211927/csv:101220852/csv:101213074/csv:101216029/csv:101208699/csv:101209903/csv:101209430/csv:101205699/csv:101217174/csv:101205918/csv:101204929/csv:101208728/csv:101217925/csv:101208322/csv:101209854/csv:101218300/csv:101217944/csv:101221482/csv:101209516/csv:101…	30	24	CsaV3_6G044640/CsaV3_7G022960/CsaV3_1G009420/CsaV3_3G008370/CsaV3_6G001210/CsaV3_4G000040/CsaV3_2G017260/CsaV3_2G008560/CsaV3_1G009410/CsaV3_4G017590/CsaV3_1G001600/CsaV3_4G006350/CsaV3_6G050730/CsaV3_6G036340/CsaV3_3G033310/CsaV3_4G037690/CsaV3_4G013550/CsaV3_6G040390/CsaV3_7G024950/CsaV3_2G028640/CsaV3_5G010390/CsaV3_1G003090/CsaV3_6G031750/CsaV3_2G013320	6	CsaV3_6G004010/CsaV3_2G015280/CsaV3_4G025880/CsaV3_2G003650/CsaV3_3G015070/CsaV3_2G001860
csv04136	Autophagy - other	8/1171	30/4131	0.648873	0.99998	CsaV3_2G007690/CsaV3_1G039890/CsaV3_6G049010/CsaV3_1G000860/CsaV3_7G030480/CsaV3_2G007770/CsaV3_6G009210/CsaV3_4G026950	CsaV3_2G007690/CsaV3_1G039890/CsaV3_6G049010/CsaV3_1G000860/CsaV3_7G030480/CsaV3_2G007770/CsaV3_6G009210/CsaV3_4G026950	csv:101216810/csv:101221823/csv:101219454/csv:101219308/csv:101213890/csv:101215606/csv:101204045/csv:101210550	8	3	CsaV3_2G007690/CsaV3_2G007770/CsaV3_4G026950	5	CsaV3_1G039890/CsaV3_6G049010/CsaV3_1G000860/CsaV3_7G030480/CsaV3_6G009210
csv00220	Arginine biosynthesis	9/1171	34/4131	0.659531	0.99998	CsaV3_4G013270/CsaV3_1G000670/CsaV3_5G031220/CsaV3_7G030560/CsaV3_5G030450/CsaV3_1G013270/CsaV3_4G004380/CsaV3_3G045350/CsaV3_3G049270	CsaV3_4G013270/CsaV3_1G000670/CsaV3_5G031220/CsaV3_7G030560/CsaV3_5G030450/CsaV3_1G013270/CsaV3_4G004380/CsaV3_3G045350/CsaV3_3G049270	csv:101221948/csv:101215982/csv:101220645/csv:101213413/csv:101209590/csv:101217299/csv:101202786/csv:101222023/csv:101220069	9	9	CsaV3_4G013270/CsaV3_1G000670/CsaV3_5G031220/CsaV3_7G030560/CsaV3_5G030450/CsaV3_1G013270/CsaV3_4G004380/CsaV3_3G045350/CsaV3_3G049270	0
csv00053	Ascorbate and aldarate metabolism	11/1171	42/4131	0.678605	0.99998	CsaV3_5G027030/CsaV3_1G040000/CsaV3_1G042210/CsaV3_1G033510/CsaV3_6G040510/CsaV3_1G001600/CsaV3_2G001660/CsaV3_5G027310/CsaV3_7G000930/CsaV3_3G020840/CsaV3_6G032500	CsaV3_5G027030/CsaV3_1G040000/CsaV3_1G042210/CsaV3_1G033510/CsaV3_6G040510/CsaV3_1G001600/CsaV3_2G001660/CsaV3_5G027310/CsaV3_7G000930/CsaV3_3G020840/CsaV3_6G032500	csv:101220205/csv:101202978/csv:101215231/csv:101203032/csv:101210277/csv:101209430/csv:101221451/csv:101203883/csv:101206941/csv:101203335/csv:101203157	11	7	CsaV3_1G042210/CsaV3_1G033510/CsaV3_6G040510/CsaV3_1G001600/CsaV3_2G001660/CsaV3_3G020840/CsaV3_6G032500	4	CsaV3_5G027030/CsaV3_1G040000/CsaV3_5G027310/CsaV3_7G000930
csv00310	Lysine degradation	7/1171	27/4131	0.680457	0.99998	CsaV3_5G023260/CsaV3_1G001600/CsaV3_7G002460/CsaV3_1G041440/CsaV3_3G011580/CsaV3_3G027790/CsaV3_2G016440	CsaV3_5G023260/CsaV3_1G001600/CsaV3_7G002460/CsaV3_1G041440/CsaV3_3G011580/CsaV3_3G027790/CsaV3_2G016440	csv:101220194/csv:101209430/csv:101214645/csv:101214976/csv:101222210/csv:101204477/csv:101210052	7	4	CsaV3_5G023260/CsaV3_1G001600/CsaV3_7G002460/CsaV3_2G016440	3	CsaV3_1G041440/CsaV3_3G011580/CsaV3_3G027790
csv03430	Mismatch repair	8/1171	31/4131	0.688736	0.99998	CsaV3_2G002320/CsaV3_6G038660/CsaV3_1G012200/CsaV3_6G046400/CsaV3_7G029930/CsaV3_5G005690/CsaV3_1G031640/CsaV3_4G028050	CsaV3_2G002320/CsaV3_6G038660/CsaV3_1G012200/CsaV3_6G046400/CsaV3_7G029930/CsaV3_5G005690/CsaV3_1G031640/CsaV3_4G028050	csv:101210755/csv:101204361/csv:101208249/csv:101218071/csv:101219303/csv:101209940/csv:101219981/csv:101221224	8	3	CsaV3_2G002320/CsaV3_5G005690/CsaV3_1G031640	5	CsaV3_6G038660/CsaV3_1G012200/CsaV3_6G046400/CsaV3_7G029930/CsaV3_4G028050
csv03420	Nucleotide excision repair	13/1171	50/4131	0.695404	0.99998	CsaV3_6G038660/CsaV3_3G005850/CsaV3_3G005500/CsaV3_4G027560/CsaV3_6G046400/CsaV3_2G001130/CsaV3_1G004160/CsaV3_5G005690/CsaV3_1G032270/CsaV3_3G003270/CsaV3_1G031640/CsaV3_3G049790/CsaV3_4G028050	CsaV3_6G038660/CsaV3_3G005850/CsaV3_3G005500/CsaV3_4G027560/CsaV3_6G046400/CsaV3_2G001130/CsaV3_1G004160/CsaV3_5G005690/CsaV3_1G032270/CsaV3_3G003270/CsaV3_1G031640/CsaV3_3G049790/CsaV3_4G028050	csv:101204361/csv:101209230/csv:101209897/csv:101203811/csv:101218071/csv:101209687/csv:101217645/csv:101209940/csv:101207444/csv:101204877/csv:101219981/csv:101210951/csv:101221224	13	6	CsaV3_2G001130/CsaV3_1G004160/CsaV3_5G005690/CsaV3_1G032270/CsaV3_1G031640/CsaV3_3G049790	7	CsaV3_6G038660/CsaV3_3G005850/CsaV3_3G005500/CsaV3_4G027560/CsaV3_6G046400/CsaV3_3G003270/CsaV3_4G028050
csv00970	Aminoacyl-tRNA biosynthesis	13/1171	51/4131	0.72476	0.99998	CsaV3_1G039910/CsaV3_2G016280/CsaV3_5G013970/CsaV3_6G012710/CsaV3_2G009270/CsaV3_UNG110800/CsaV3_6G052840/CsaV3_7G002150/CsaV3_3G046200/CsaV3_1G012830/CsaV3_4G036250/CsaV3_1G038230/CsaV3_5G014480	CsaV3_1G039910/CsaV3_2G016280/CsaV3_5G013970/CsaV3_6G012710/CsaV3_2G009270/CsaV3_UNG110800/CsaV3_6G052840/CsaV3_7G002150/CsaV3_3G046200/CsaV3_1G012830/CsaV3_4G036250/CsaV3_1G038230/CsaV3_5G014480	csv:101222059/csv:101222339/csv:101203909/csv:101206513/csv:101213236/csv:101220233/csv:101205162/csv:101212759/csv:101210985/csv:101213618/csv:101211267/csv:101218513/csv:101203149	13	4	CsaV3_2G016280/CsaV3_5G013970/CsaV3_2G009270/CsaV3_1G038230	9	CsaV3_1G039910/CsaV3_6G012710/CsaV3_UNG110800/CsaV3_6G052840/CsaV3_7G002150/CsaV3_3G046200/CsaV3_1G012830/CsaV3_4G036250/CsaV3_5G014480
csv00906	Carotenoid biosynthesis	8/1171	32/4131	0.725621	0.99998	CsaV3_4G007760/CsaV3_4G023380/CsaV3_1G034470/CsaV3_6G040180/CsaV3_4G007180/CsaV3_4G007140/CsaV3_2G013780/CsaV3_4G034320	CsaV3_4G007760/CsaV3_4G023380/CsaV3_1G034470/CsaV3_6G040180/CsaV3_4G007180/CsaV3_4G007140/CsaV3_2G013780/CsaV3_4G034320	csv:101219505/csv:101216484/csv:101216531/csv:101204961/csv:101220226/csv:101212508/csv:101219340/csv:101213916	8	5	CsaV3_4G023380/CsaV3_1G034470/CsaV3_6G040180/CsaV3_4G007140/CsaV3_2G013780	3	CsaV3_4G007760/CsaV3_4G007180/CsaV3_4G034320
csv00360	Phenylalanine metabolism	11/1171	44/4131	0.74183	0.99998	CsaV3_4G032000/CsaV3_5G003800/CsaV3_4G033420/CsaV3_1G013270/CsaV3_5G003790/CsaV3_6G015190/CsaV3_4G000360/CsaV3_6G039690/CsaV3_4G002310/CsaV3_2G015820/CsaV3_1G001170	CsaV3_4G032000/CsaV3_5G003800/CsaV3_4G033420/CsaV3_1G013270/CsaV3_5G003790/CsaV3_6G015190/CsaV3_4G000360/CsaV3_6G039690/CsaV3_4G002310/CsaV3_2G015820/CsaV3_1G001170	csv:101215051/csv:101212818/csv:101212407/csv:101217299/csv:101213059/csv:101221092/csv:101212914/csv:101218617/csv:101203846/csv:101215057/csv:101204200	11	6	CsaV3_5G003800/CsaV3_1G013270/CsaV3_5G003790/CsaV3_6G015190/CsaV3_4G000360/CsaV3_1G001170	5	CsaV3_4G032000/CsaV3_4G033420/CsaV3_6G039690/CsaV3_4G002310/CsaV3_2G015820
csv02010	ABC transporters	5/1171	21/4131	0.753399	0.99998	CsaV3_6G052240/CsaV3_3G035990/CsaV3_6G051320/CsaV3_3G032770/CsaV3_5G026260	CsaV3_6G052240/CsaV3_3G035990/CsaV3_6G051320/CsaV3_3G032770/CsaV3_5G026260	csv:101209905/csv:101220974/csv:101210649/csv:101211576/csv:101219839	5	4	CsaV3_6G052240/CsaV3_3G035990/CsaV3_6G051320/CsaV3_3G032770	1	CsaV3_5G026260
csv00561	Glycerolipid metabolism	16/1171	64/4131	0.767015	0.99998	CsaV3_2G028420/CsaV3_1G007380/CsaV3_2G033910/CsaV3_5G029190/CsaV3_1G011950/CsaV3_1G001600/CsaV3_4G024550/CsaV3_3G033310/CsaV3_3G015560/CsaV3_3G005860/CsaV3_6G041120/CsaV3_6G038110/CsaV3_4G027880/CsaV3_5G008230/CsaV3_1G010300/CsaV3_3G048840	CsaV3_2G028420/CsaV3_1G007380/CsaV3_2G033910/CsaV3_5G029190/CsaV3_1G011950/CsaV3_1G001600/CsaV3_4G024550/CsaV3_3G033310/CsaV3_3G015560/CsaV3_3G005860/CsaV3_6G041120/CsaV3_6G038110/CsaV3_4G027880/CsaV3_5G008230/CsaV3_1G010300/CsaV3_3G048840	csv:101220795/csv:101210503/csv:101213816/csv:101211924/csv:101206306/csv:101209430/csv:101210022/csv:101204929/csv:101205287/csv:101208743/csv:101218383/csv:101214551/csv:101220288/csv:101205124/csv:101208763/csv:101213494	16	6	CsaV3_2G033910/CsaV3_5G029190/CsaV3_1G001600/CsaV3_3G033310/CsaV3_6G038110/CsaV3_1G010300	10	CsaV3_2G028420/CsaV3_1G007380/CsaV3_1G011950/CsaV3_4G024550/CsaV3_3G015560/CsaV3_3G005860/CsaV3_6G041120/CsaV3_4G027880/CsaV3_5G008230/CsaV3_3G048840
csv00190	Oxidative phosphorylation	36/1171	139/4131	0.770686	0.99998	CsaV3_2G008520/CsaV3_2G031420/CsaV3_1G007980/CsaV3_3G046610/CsaV3_6G046410/CsaV3_1G010750/CsaV3_UNG141080/CsaV3_4G001330/CsaV3_3G006320/CsaV3_2G036030/CsaV3_5G024920/CsaV3_1G002100/CsaV3_UNG209980/CsaV3_5G036890/CsaV3_6G023980/CsaV3_2G031740/CsaV3_5G024910/CsaV3_5G036470/CsaV3_4G024730/CsaV3_2G003510/CsaV3_2G029210/CsaV3_7G000200/CsaV3_4G001900/CsaV3_6G025260/CsaV3_6G007320/CsaV3_6G008400/CsaV3_3…	CsaV3_2G008520/CsaV3_2G031420/CsaV3_1G007980/CsaV3_3G046610/CsaV3_6G046410/CsaV3_1G010750/CsaV3_UNG141080/CsaV3_4G001330/CsaV3_3G006320/CsaV3_2G036030/CsaV3_5G024920/CsaV3_1G002100/CsaV3_UNG209980/CsaV3_5G036890/CsaV3_6G023980/CsaV3_2G031740/CsaV3_5G024910/CsaV3_5G036470/CsaV3_4G024730/CsaV3_2G003510/CsaV3_2G029210/CsaV3_7G000200/CsaV3_4G001900/CsaV3_6G025260/CsaV3_6G007320/CsaV3_6G008400/CsaV3_3…	csv:101221564/csv:101213505/csv:101214920/csv:101205012/csv:101222890/csv:101214408/csv:101217923/csv:101218811/csv:101205238/csv:101204899/csv:101222955/csv:101217264/csv:11123919/csv:101216485/csv:11123862/csv:101221052/csv:101222717/csv:101204220/csv:101217432/csv:101214655/csv:101209817/csv:101211364/csv:101209815/csv:11123862/csv:101207411/csv:101214636/csv:101205189/csv:3429253/csv:11123895…	36	25	CsaV3_2G008520/CsaV3_2G031420/CsaV3_1G007980/CsaV3_3G046610/CsaV3_6G046410/CsaV3_UNG141080/CsaV3_4G001330/CsaV3_3G006320/CsaV3_2G036030/CsaV3_5G024920/CsaV3_1G002100/CsaV3_UNG209980/CsaV3_5G024910/CsaV3_5G036470/CsaV3_2G003510/CsaV3_2G029210/CsaV3_4G001900/CsaV3_6G007320/CsaV3_6G008400/CsaV3_3G017880/CsaV3_UNG208130/CsaV3_5G028650/CsaV3_4G004740/CsaV3_2G001570/CsaV3_4G005080	11	CsaV3_1G010750/CsaV3_5G036890/CsaV3_6G023980/CsaV3_2G031740/CsaV3_4G024730/CsaV3_7G000200/CsaV3_6G025260/CsaV3_UNG208980/CsaV3_2G029320/CsaV3_3G010990/CsaV3_7G033710
csv04141	Protein processing in endoplasmic reticulum	43/1171	165/4131	0.77274	0.99998	CsaV3_3G034390/CsaV3_5G008760/CsaV3_1G038710/CsaV3_3G027480/CsaV3_2G028400/CsaV3_6G013200/CsaV3_7G008470/CsaV3_7G010210/CsaV3_3G017490/CsaV3_6G048860/CsaV3_7G008210/CsaV3_7G024760/CsaV3_3G026970/CsaV3_5G008690/CsaV3_1G039940/CsaV3_1G035820/CsaV3_7G029820/CsaV3_5G008780/CsaV3_2G013200/CsaV3_1G035810/CsaV3_4G001160/CsaV3_1G044020/CsaV3_2G009170/CsaV3_2G001130/CsaV3_5G002220/CsaV3_3G000340/CsaV3_4G0…	CsaV3_3G034390/CsaV3_5G008760/CsaV3_1G038710/CsaV3_3G027480/CsaV3_2G028400/CsaV3_6G013200/CsaV3_7G008470/CsaV3_7G010210/CsaV3_3G017490/CsaV3_6G048860/CsaV3_7G008210/CsaV3_7G024760/CsaV3_3G026970/CsaV3_5G008690/CsaV3_1G039940/CsaV3_1G035820/CsaV3_7G029820/CsaV3_5G008780/CsaV3_2G013200/CsaV3_1G035810/CsaV3_4G001160/CsaV3_1G044020/CsaV3_2G009170/CsaV3_2G001130/CsaV3_5G002220/CsaV3_3G000340/CsaV3_4G0…	csv:101219630/csv:101211939/csv:101221822/csv:101210531/csv:101221027/csv:101220979/csv:101222781/csv:101203376/csv:101210914/csv:101221743/csv:101220889/csv:101212307/csv:101215372/csv:101217071/csv:101222536/csv:101204421/csv:101202981/csv:101211702/csv:101204086/csv:101204666/csv:101221417/csv:101205422/csv:101215564/csv:101209687/csv:101210687/csv:101203166/csv:101206161/csv:101210969/csv:101…	43	15	CsaV3_3G034390/CsaV3_1G038710/CsaV3_6G013200/CsaV3_3G017490/CsaV3_6G048860/CsaV3_3G026970/CsaV3_7G029820/CsaV3_2G013200/CsaV3_4G001160/CsaV3_2G001130/CsaV3_4G004150/CsaV3_6G047890/CsaV3_6G034330/CsaV3_5G026450/CsaV3_5G000720	28	CsaV3_5G008760/CsaV3_3G027480/CsaV3_2G028400/CsaV3_7G008470/CsaV3_7G010210/CsaV3_7G008210/CsaV3_7G024760/CsaV3_5G008690/CsaV3_1G039940/CsaV3_1G035820/CsaV3_5G008780/CsaV3_1G035810/CsaV3_1G044020/CsaV3_2G009170/CsaV3_5G002220/CsaV3_3G000340/CsaV3_4G001560/CsaV3_1G024100/CsaV3_6G007640/CsaV3_5G030610/CsaV3_3G017480/CsaV3_4G025150/CsaV3_5G026520/CsaV3_5G035180/CsaV3_3G012670/CsaV3_7G021800/CsaV3_2G0…
csv00563	Glycosylphosphatidylinositol (GPI)-anchor biosynthesis	4/1171	18/4131	0.795849	0.99998	CsaV3_4G022060/CsaV3_1G042220/CsaV3_3G001560/CsaV3_1G037410	CsaV3_4G022060/CsaV3_1G042220/CsaV3_3G001560/CsaV3_1G037410	csv:101216602/csv:101215474/csv:101206318/csv:101216463	4	0		4	CsaV3_4G022060/CsaV3_1G042220/CsaV3_3G001560/CsaV3_1G037410
csv00591	Linoleic acid metabolism	4/1171	18/4131	0.795849	0.99998	CsaV3_2G005350/CsaV3_2G006390/CsaV3_4G027880/CsaV3_7G034390	CsaV3_2G005350/CsaV3_2G006390/CsaV3_4G027880/CsaV3_7G034390	csv:101208141/csv:105434554/csv:101220288/csv:101204952	4	1	CsaV3_2G005350	3	CsaV3_2G006390/CsaV3_4G027880/CsaV3_7G034390
csv01210	2-Oxocarboxylic acid metabolism	11/1171	46/4131	0.796164	0.99998	CsaV3_5G031220/CsaV3_1G000550/CsaV3_1G013270/CsaV3_3G011200/CsaV3_5G027250/CsaV3_6G047780/CsaV3_6G047510/CsaV3_1G043200/CsaV3_3G049270/CsaV3_2G025820/CsaV3_6G039730	CsaV3_5G031220/CsaV3_1G000550/CsaV3_1G013270/CsaV3_3G011200/CsaV3_5G027250/CsaV3_6G047780/CsaV3_6G047510/CsaV3_1G043200/CsaV3_3G049270/CsaV3_2G025820/CsaV3_6G039730	csv:101220645/csv:101213339/csv:101217299/csv:101217323/csv:101202770/csv:101214612/csv:101217715/csv:101210312/csv:101220069/csv:101214004/csv:101219331	11	5	CsaV3_5G031220/CsaV3_1G013270/CsaV3_6G047780/CsaV3_3G049270/CsaV3_6G039730	6	CsaV3_1G000550/CsaV3_3G011200/CsaV3_5G027250/CsaV3_6G047510/CsaV3_1G043200/CsaV3_2G025820
csv00531	Glycosaminoglycan degradation	3/1171	14/4131	0.805039	0.99998	CsaV3_1G002710/CsaV3_3G043450/CsaV3_2G006730	CsaV3_1G002710/CsaV3_3G043450/CsaV3_2G006730	csv:101205085/csv:101208875/csv:101210116	3	3	CsaV3_1G002710/CsaV3_3G043450/CsaV3_2G006730	0
csv00909	Sesquiterpenoid and triterpenoid biosynthesis	3/1171	14/4131	0.805039	0.99998	CsaV3_3G003650/CsaV3_3G005760/CsaV3_2G015210	CsaV3_3G003650/CsaV3_3G005760/CsaV3_2G015210	csv:101210313/csv:101211697/csv:101205767	3	3	CsaV3_3G003650/CsaV3_3G005760/CsaV3_2G015210	0
csv00300	Lysine biosynthesis	2/1171	11597	0.823524	0.99998	CsaV3_2G014950/CsaV3_3G009570	CsaV3_2G014950/CsaV3_3G009570	csv:101208417/csv:101211954	2	1	CsaV3_2G014950	1	CsaV3_3G009570
csv03013	RNA transport	36/1171	143/4131	0.828912	0.99998	CsaV3_5G024750/CsaV3_1G023010/CsaV3_5G025900/CsaV3_2G032030/CsaV3_3G010520/CsaV3_3G005110/CsaV3_1G029790/CsaV3_5G025920/CsaV3_7G003720/CsaV3_4G006470/CsaV3_1G033610/CsaV3_4G036460/CsaV3_3G004860/CsaV3_2G007740/CsaV3_1G032830/CsaV3_6G052120/CsaV3_5G000380/CsaV3_7G024030/CsaV3_1G029680/CsaV3_6G004880/CsaV3_1G014460/CsaV3_7G031350/CsaV3_3G018690/CsaV3_3G013520/CsaV3_3G004360/CsaV3_1G044360/CsaV3_5G0…	CsaV3_5G024750/CsaV3_1G023010/CsaV3_5G025900/CsaV3_2G032030/CsaV3_3G010520/CsaV3_3G005110/CsaV3_1G029790/CsaV3_5G025920/CsaV3_7G003720/CsaV3_4G006470/CsaV3_1G033610/CsaV3_4G036460/CsaV3_3G004860/CsaV3_2G007740/CsaV3_1G032830/CsaV3_6G052120/CsaV3_5G000380/CsaV3_7G024030/CsaV3_1G029680/CsaV3_6G004880/CsaV3_1G014460/CsaV3_7G031350/CsaV3_3G018690/CsaV3_3G013520/CsaV3_3G004360/CsaV3_1G044360/CsaV3_5G0…	csv:101204684/csv:101210873/csv:101220517/csv:101217346/csv:101222372/csv:101214921/csv:101211465/csv:101220517/csv:101219651/csv:101204248/csv:101221953/csv:101211356/csv:101220230/csv:101216087/csv:101206312/csv:101219057/csv:101217759/csv:101213144/csv:101211465/csv:101219081/csv:101220978/csv:101222300/csv:101216563/csv:101208192/csv:101219355/csv:101205181/csv:101205107/csv:101210745/csv:101…	36	13	CsaV3_5G024750/CsaV3_2G032030/CsaV3_3G005110/CsaV3_1G029790/CsaV3_7G003720/CsaV3_3G004860/CsaV3_2G007740/CsaV3_1G032830/CsaV3_1G029680/CsaV3_1G044360/CsaV3_5G003280/CsaV3_3G039830/CsaV3_5G023770	23	CsaV3_1G023010/CsaV3_5G025900/CsaV3_3G010520/CsaV3_5G025920/CsaV3_4G006470/CsaV3_1G033610/CsaV3_4G036460/CsaV3_6G052120/CsaV3_5G000380/CsaV3_7G024030/CsaV3_6G004880/CsaV3_1G014460/CsaV3_7G031350/CsaV3_3G018690/CsaV3_3G013520/CsaV3_3G004360/CsaV3_2G012490/CsaV3_6G046130/CsaV3_1G003550/CsaV3_UNG186470/CsaV3_3G031460/CsaV3_2G015740/CsaV3_1G043070
csv00195	Photosynthesis	12/1171	52/4131	0.842332	0.99998	CsaV3_1G010750/CsaV3_6G052210/CsaV3_3G019220/CsaV3_7G004050/CsaV3_6G052330/CsaV3_6G053010/CsaV3_2G004030/CsaV3_1G011330/CsaV3_3G019210/CsaV3_3G049310/CsaV3_1G015100/CsaV3_4G007600	CsaV3_1G010750/CsaV3_6G052210/CsaV3_3G019220/CsaV3_7G004050/CsaV3_6G052330/CsaV3_6G053010/CsaV3_2G004030/CsaV3_1G011330/CsaV3_3G019210/CsaV3_3G049310/CsaV3_1G015100/CsaV3_4G007600	csv:101214408/csv:101209832/csv:101204479/csv:101221828/csv:101216935/csv:101222612/csv:101203467/csv:101209135/csv:101204727/csv:101221013/csv:101209111/csv:101215781	12	5	CsaV3_6G052210/CsaV3_3G019220/CsaV3_6G052330/CsaV3_3G019210/CsaV3_4G007600	7	CsaV3_1G010750/CsaV3_7G004050/CsaV3_6G053010/CsaV3_2G004030/CsaV3_1G011330/CsaV3_3G049310/CsaV3_1G015100
csv00514	Other types of O-glycan biosynthesis	2/1171	11628	0.863543	0.99998	CsaV3_2G032270/CsaV3_6G040850	CsaV3_2G032270/CsaV3_6G040850	csv:101214063/csv:101215452	2	1	CsaV3_2G032270	1	CsaV3_6G040850
csv03410	Base excision repair	7/1171	33/4131	0.867663	0.99998	CsaV3_6G046270/CsaV3_5G037160/CsaV3_5G005690/CsaV3_1G032270/CsaV3_6G034200/CsaV3_1G008250/CsaV3_3G022600	CsaV3_6G046270/CsaV3_5G037160/CsaV3_5G005690/CsaV3_1G032270/CsaV3_6G034200/CsaV3_1G008250/CsaV3_3G022600	csv:101219253/csv:101211755/csv:101209940/csv:101207444/csv:101219118/csv:101219928/csv:101219129	7	2	CsaV3_5G005690/CsaV3_1G032270	5	CsaV3_6G046270/CsaV3_5G037160/CsaV3_6G034200/CsaV3_1G008250/CsaV3_3G022600
csv00730	Thiamine metabolism	4/1171	21/4131	0.887055	0.99998	CsaV3_3G005340/CsaV3_3G006930/CsaV3_1G036050/CsaV3_6G044470	CsaV3_3G005340/CsaV3_3G006930/CsaV3_1G036050/CsaV3_6G044470	csv:101211553/csv:101218190/csv:101213554/csv:101218146	4	2	CsaV3_3G005340/CsaV3_6G044470	2	CsaV3_3G006930/CsaV3_1G036050
csv00780	Biotin metabolism	2/1171	11658	0.895073	0.99998	CsaV3_5G001240/CsaV3_1G041340	CsaV3_5G001240/CsaV3_1G041340	csv:101213297/csv:101213530	2	0		2	CsaV3_5G001240/CsaV3_1G041340
csv00770	Pantothenate and CoA biosynthesis	4/1171	22/4131	0.908322	0.99998	CsaV3_1G000550/CsaV3_3G011200/CsaV3_6G035700/CsaV3_2G025820	CsaV3_1G000550/CsaV3_3G011200/CsaV3_6G035700/CsaV3_2G025820	csv:101213339/csv:101217323/csv:101214416/csv:101214004	4	0		4	CsaV3_1G000550/CsaV3_3G011200/CsaV3_6G035700/CsaV3_2G025820
csv00740	Riboflavin metabolism	2/1171	13/4131	0.919708	0.99998	CsaV3_6G013000/CsaV3_5G029010	CsaV3_6G013000/CsaV3_5G029010	csv:105435790/csv:101215305	2	0		2	CsaV3_6G013000/CsaV3_5G029010
csv00940	Phenylpropanoid biosynthesis	31/1171	133/4131	0.922675	0.99998	CsaV3_4G023610/CsaV3_4G023680/CsaV3_5G030330/CsaV3_1G030170/CsaV3_3G047080/CsaV3_3G018190/CsaV3_3G040220/CsaV3_3G043060/CsaV3_1G010780/CsaV3_4G023590/CsaV3_1G042470/CsaV3_3G042040/CsaV3_4G029960/CsaV3_4G023630/CsaV3_4G023650/CsaV3_6G019040/CsaV3_2G036090/CsaV3_6G039690/CsaV3_2G018010/CsaV3_5G005000/CsaV3_1G004550/CsaV3_3G018340/CsaV3_1G010960/CsaV3_5G035070/CsaV3_7G005720/CsaV3_4G002310/CsaV3_7G0…	CsaV3_4G023610/CsaV3_4G023680/CsaV3_5G030330/CsaV3_1G030170/CsaV3_3G047080/CsaV3_3G018190/CsaV3_3G040220/CsaV3_3G043060/CsaV3_1G010780/CsaV3_4G023590/CsaV3_1G042470/CsaV3_3G042040/CsaV3_4G029960/CsaV3_4G023630/CsaV3_4G023650/CsaV3_6G019040/CsaV3_2G036090/CsaV3_6G039690/CsaV3_2G018010/CsaV3_5G005000/CsaV3_1G004550/CsaV3_3G018340/CsaV3_1G010960/CsaV3_5G035070/CsaV3_7G005720/CsaV3_4G002310/CsaV3_7G0…	csv:101212717/csv:101211257/csv:101212121/csv:101214998/csv:101218982/csv:101222395/csv:101214138/csv:101223112/csv:101214168/csv:101212957/csv:101208027/csv:101219829/csv:101202852/csv:101212230/csv:101211752/csv:101207371/csv:101221344/csv:101218617/csv:101206562/csv:101215530/csv:101204835/csv:101220507/csv:101209136/csv:101209588/csv:101208932/csv:101203846/csv:101218121/csv:101211593/csv:101…	31	21	CsaV3_4G023610/CsaV3_4G023680/CsaV3_1G030170/CsaV3_3G047080/CsaV3_3G018190/CsaV3_3G043060/CsaV3_1G010780/CsaV3_4G023590/CsaV3_1G042470/CsaV3_4G029960/CsaV3_4G023630/CsaV3_6G019040/CsaV3_2G036090/CsaV3_2G018010/CsaV3_1G004550/CsaV3_3G018340/CsaV3_1G010960/CsaV3_5G035070/CsaV3_7G005720/CsaV3_2G015230/CsaV3_6G006890	10	CsaV3_5G030330/CsaV3_3G040220/CsaV3_3G042040/CsaV3_4G023650/CsaV3_6G039690/CsaV3_5G005000/CsaV3_4G002310/CsaV3_7G031620/CsaV3_3G036010/CsaV3_4G023620
csv00062	Fatty acid elongation	4/1171	23/4131	0.925954	0.99998	CsaV3_6G022090/CsaV3_3G007660/CsaV3_3G043140/CsaV3_5G004490	CsaV3_6G022090/CsaV3_3G007660/CsaV3_3G043140/CsaV3_5G004490	csv:101213216/csv:101203776/csv:101221849/csv:101222043	4	4	CsaV3_6G022090/CsaV3_3G007660/CsaV3_3G043140/CsaV3_5G004490	0
csv00904	Diterpenoid biosynthesis	4/1171	24/4131	0.940471	0.99998	CsaV3_6G006520/CsaV3_3G049400/CsaV3_4G033930/CsaV3_5G005560	CsaV3_6G006520/CsaV3_3G049400/CsaV3_4G033930/CsaV3_5G005560	csv:101220640/csv:101206798/csv:101209283/csv:101212803	4	4	CsaV3_6G006520/CsaV3_3G049400/CsaV3_4G033930/CsaV3_5G005560	0
csv00380	Tryptophan metabolism	7/1171	39/4131	0.953733	0.99998	CsaV3_5G033650/CsaV3_4G037250/CsaV3_1G001600/CsaV3_7G002460/CsaV3_7G032920/CsaV3_6G007230/CsaV3_2G015820	CsaV3_5G033650/CsaV3_4G037250/CsaV3_1G001600/CsaV3_7G002460/CsaV3_7G032920/CsaV3_6G007230/CsaV3_2G015820	csv:101208854/csv:101202931/csv:101209430/csv:101214645/csv:101221824/csv:101208872/csv:101215057	7	3	CsaV3_1G001600/CsaV3_7G002460/CsaV3_7G032920	4	CsaV3_5G033650/CsaV3_4G037250/CsaV3_6G007230/CsaV3_2G015820
csv03018	RNA degradation	20/1171	94/4131	0.954268	0.99998	CsaV3_6G038490/CsaV3_2G009040/CsaV3_1G015170/CsaV3_3G009030/CsaV3_UNG224740/CsaV3_6G036430/CsaV3_3G043330/CsaV3_2G032410/CsaV3_5G033630/CsaV3_6G004880/CsaV3_7G024630/CsaV3_4G012120/CsaV3_6G040390/CsaV3_6G035830/CsaV3_7G031350/CsaV3_1G042970/CsaV3_1G017330/CsaV3_3G038040/CsaV3_1G004100/CsaV3_1G003090	CsaV3_6G038490/CsaV3_2G009040/CsaV3_1G015170/CsaV3_3G009030/CsaV3_UNG224740/CsaV3_6G036430/CsaV3_3G043330/CsaV3_2G032410/CsaV3_5G033630/CsaV3_6G004880/CsaV3_7G024630/CsaV3_4G012120/CsaV3_6G040390/CsaV3_6G035830/CsaV3_7G031350/CsaV3_1G042970/CsaV3_1G017330/CsaV3_3G038040/CsaV3_1G004100/CsaV3_1G003090	csv:101219801/csv:101205306/csv:101210423/csv:101203201/csv:101221637/csv:101205224/csv:101206210/csv:101212217/csv:101209342/csv:101219081/csv:101203991/csv:101220390/csv:101208322/csv:101212730/csv:101222300/csv:101215027/csv:101221637/csv:101208686/csv:101211075/csv:101209516	20	6	CsaV3_3G009030/CsaV3_3G043330/CsaV3_5G033630/CsaV3_6G040390/CsaV3_1G042970/CsaV3_1G003090	14	CsaV3_6G038490/CsaV3_2G009040/CsaV3_1G015170/CsaV3_UNG224740/CsaV3_6G036430/CsaV3_2G032410/CsaV3_6G004880/CsaV3_7G024630/CsaV3_4G012120/CsaV3_6G035830/CsaV3_7G031350/CsaV3_1G017330/CsaV3_3G038040/CsaV3_1G004100
csv04130	SNARE interactions in vesicular transport	6/1171	35/4131	0.958257	0.99998	CsaV3_3G022610/CsaV3_3G017070/CsaV3_3G046300/CsaV3_3G038070/CsaV3_4G002040/CsaV3_3G043100	CsaV3_3G022610/CsaV3_3G017070/CsaV3_3G046300/CsaV3_3G038070/CsaV3_4G002040/CsaV3_3G043100	csv:101218891/csv:101213515/csv:101209595/csv:101208931/csv:101207624/csv:101203075	6	1	CsaV3_3G017070	5	CsaV3_3G022610/CsaV3_3G046300/CsaV3_3G038070/CsaV3_4G002040/CsaV3_3G043100
csv00340	Histidine metabolism	2/1171	16/4131	0.964862	0.99998	CsaV3_1G001600/CsaV3_6G005330	CsaV3_1G001600/CsaV3_6G005330	csv:101209430/csv:101204289	2	2	CsaV3_1G001600/CsaV3_6G005330	0
csv03440	Homologous recombination	14/1171	72/4131	0.969724	0.99998	CsaV3_UNG040210/novel.1204/CsaV3_UNG169310/CsaV3_5G019970/CsaV3_2G015070/CsaV3_6G052190/CsaV3_7G029870/CsaV3_5G005690/CsaV3_1G031640/CsaV3_UNG098730/CsaV3_3G044350/CsaV3_3G028200/CsaV3_2G000040/CsaV3_3G039390	CsaV3_UNG040210/-/CsaV3_UNG169310/CsaV3_5G019970/CsaV3_2G015070/CsaV3_6G052190/CsaV3_7G029870/CsaV3_5G005690/CsaV3_1G031640/CsaV3_UNG098730/CsaV3_3G044350/CsaV3_3G028200/CsaV3_2G000040/CsaV3_3G039390	csv:101210305/csv:101210305/csv:101210305/csv:101210305/csv:101207775/csv:101212120/csv:101219784/csv:101209940/csv:101219981/csv:101210305/csv:101217141/csv:101222995/csv:101210305/csv:101209351	14	6	CsaV3_6G052190/CsaV3_7G029870/CsaV3_5G005690/CsaV3_1G031640/CsaV3_3G044350/CsaV3_3G028200	8	CsaV3_UNG040210/novel.1204/CsaV3_UNG169310/CsaV3_5G019970/CsaV3_2G015070/CsaV3_UNG098730/CsaV3_2G000040/CsaV3_3G039390
csv00941	Flavonoid biosynthesis	2/1171	17/4131	0.973496	0.99998	CsaV3_5G030330/CsaV3_3G000790	CsaV3_5G030330/CsaV3_3G000790	csv:101212121/csv:101215613	2	1	CsaV3_3G000790	1	CsaV3_5G030330
csv00040	Pentose and glucuronate interconversions	14/1171	74/4131	0.977811	0.99998	CsaV3_7G033930/CsaV3_5G028290/CsaV3_5G027030/CsaV3_2G008080/CsaV3_7G029590/CsaV3_3G033310/CsaV3_2G034200/CsaV3_1G038620/CsaV3_3G028700/CsaV3_3G011280/CsaV3_5G026870/CsaV3_1G005660/CsaV3_2G024360/CsaV3_6G032500	CsaV3_7G033930/CsaV3_5G028290/CsaV3_5G027030/CsaV3_2G008080/CsaV3_7G029590/CsaV3_3G033310/CsaV3_2G034200/CsaV3_1G038620/CsaV3_3G028700/CsaV3_3G011280/CsaV3_5G026870/CsaV3_1G005660/CsaV3_2G024360/CsaV3_6G032500	csv:101212388/csv:101219120/csv:101220205/csv:101209640/csv:101205321/csv:101204929/csv:101209273/csv:101202977/csv:101207204/csv:101218188/csv:101217834/csv:101219871/csv:101214883/csv:101203157	14	10	CsaV3_7G033930/CsaV3_5G028290/CsaV3_7G029590/CsaV3_3G033310/CsaV3_1G038620/CsaV3_3G028700/CsaV3_3G011280/CsaV3_5G026870/CsaV3_2G024360/CsaV3_6G032500	4	CsaV3_5G027030/CsaV3_2G008080/CsaV3_2G034200/CsaV3_1G005660
csv03020	RNA polymerase	7/1171	43/4131	0.978676	0.99998	CsaV3_UNG188480/CsaV3_4G002660/CsaV3_6G048110/CsaV3_3G039160/CsaV3_4G004060/CsaV3_4G004830/CsaV3_7G035230	CsaV3_UNG188480/CsaV3_4G002660/CsaV3_6G048110/CsaV3_3G039160/CsaV3_4G004060/CsaV3_4G004830/CsaV3_7G035230	csv:101207932/csv:101220087/csv:101213971/csv:101205880/csv:101207602/csv:101207932/csv:101204777	7	4	CsaV3_4G002660/CsaV3_6G048110/CsaV3_4G004060/CsaV3_4G004830	3	CsaV3_UNG188480/CsaV3_3G039160/CsaV3_7G035230
csv03060	Protein export	7/1171	43/4131	0.978676	0.99998	CsaV3_3G026970/CsaV3_3G009150/CsaV3_6G040720/CsaV3_4G033950/CsaV3_4G001950/CsaV3_1G043340/CsaV3_4G001480	CsaV3_3G026970/CsaV3_3G009150/CsaV3_6G040720/CsaV3_4G033950/CsaV3_4G001950/CsaV3_1G043340/CsaV3_4G001480	csv:101215372/csv:101205155/csv:101209537/csv:101221060/csv:101209324/csv:101217111/csv:101215961	7	2	CsaV3_3G026970/CsaV3_4G001950	5	CsaV3_3G009150/CsaV3_6G040720/CsaV3_4G033950/CsaV3_1G043340/CsaV3_4G001480
csv00945	Stilbenoid, diarylheptanoid and gingerol biosynthesis	1/1171	11658	0.981799	0.99998	CsaV3_5G030330	CsaV3_5G030330	csv:101212121	1	0		1	CsaV3_5G030330
csv00510	N-Glycan biosynthesis	6/1171	42/4131	0.990429	0.99998	CsaV3_4G033140/CsaV3_5G026660/CsaV3_5G031040/CsaV3_1G024100/CsaV3_5G010300/CsaV3_1G013400	CsaV3_4G033140/CsaV3_5G026660/CsaV3_5G031040/CsaV3_1G024100/CsaV3_5G010300/CsaV3_1G013400	csv:101208085/csv:101213832/csv:101222690/csv:101210958/csv:101207680/csv:101218949	6	1	CsaV3_5G010300	5	CsaV3_4G033140/CsaV3_5G026660/CsaV3_5G031040/CsaV3_1G024100/CsaV3_1G013400
csv00513	Various types of N-glycan biosynthesis	4/1171	32/4131	0.990915	0.99998	CsaV3_6G004710/CsaV3_4G033140/CsaV3_1G024100/CsaV3_5G010300	CsaV3_6G004710/CsaV3_4G033140/CsaV3_1G024100/CsaV3_5G010300	csv:101216230/csv:101208085/csv:101210958/csv:101207680	4	1	CsaV3_5G010300	3	CsaV3_6G004710/CsaV3_4G033140/CsaV3_1G024100
csv00051	Fructose and mannose metabolism	8/1171	53/4131	0.992676	0.99998	CsaV3_3G020950/CsaV3_5G039830/CsaV3_2G008080/CsaV3_6G004010/CsaV3_2G015280/CsaV3_4G025880/CsaV3_4G037690/CsaV3_2G001860	CsaV3_3G020950/CsaV3_5G039830/CsaV3_2G008080/CsaV3_6G004010/CsaV3_2G015280/CsaV3_4G025880/CsaV3_4G037690/CsaV3_2G001860	csv:101223130/csv:101206286/csv:101209640/csv:101205576/csv:101204323/csv:101211927/csv:101208728/csv:101218300	8	1	CsaV3_4G037690	7	CsaV3_3G020950/CsaV3_5G039830/CsaV3_2G008080/CsaV3_6G004010/CsaV3_2G015280/CsaV3_4G025880/CsaV3_2G001860
csv00073	Cutin, suberine and wax biosynthesis	2/1171	25/4131	0.997438	0.99998	CsaV3_1G000360/CsaV3_6G014930	CsaV3_1G000360/CsaV3_6G014930	csv:101210256/csv:101209050	2	1	CsaV3_6G014930	1	CsaV3_1G000360
csv03010	Ribosome	52/1171	279/4131	0.999959	0.99998	CsaV3_5G030340/CsaV3_4G007890/CsaV3_1G000010/CsaV3_6G034270/CsaV3_4G031980/CsaV3_1G032790/CsaV3_3G015690/CsaV3_5G006630/CsaV3_7G018640/CsaV3_3G032360/CsaV3_3G008690/CsaV3_2G012650/CsaV3_3G039740/CsaV3_3G035560/CsaV3_3G012980/CsaV3_3G007620/CsaV3_6G002550/CsaV3_6G032340/CsaV3_2G008580/CsaV3_UNG210040/CsaV3_3G032030/CsaV3_3G025040/CsaV3_3G026840/CsaV3_1G038800/CsaV3_1G045700/CsaV3_3G002360/CsaV3_5G…	CsaV3_5G030340/CsaV3_4G007890/CsaV3_1G000010/CsaV3_6G034270/CsaV3_4G031980/CsaV3_1G032790/CsaV3_3G015690/CsaV3_5G006630/CsaV3_7G018640/CsaV3_3G032360/CsaV3_3G008690/CsaV3_2G012650/CsaV3_3G039740/CsaV3_3G035560/CsaV3_3G012980/CsaV3_3G007620/CsaV3_6G002550/CsaV3_6G032340/CsaV3_2G008580/CsaV3_UNG210040/CsaV3_3G032030/CsaV3_3G025040/CsaV3_3G026840/CsaV3_1G038800/CsaV3_1G045700/CsaV3_3G002360/CsaV3_5G…	csv:101211875/csv:101214864/csv:101204932/csv:101216990/csv:101221487/csv:101207271/csv:101207433/csv:101221575/csv:101213702/csv:101208176/csv:101218820/csv:101206069/csv:101210000/csv:101213502/csv:101203444/csv:101202814/csv:101214304/csv:101205274/csv:101220228/csv:3429306/csv:101216913/csv:101202950/csv:101218399/csv:101204829/csv:101209776/csv:101204872/csv:101216899/csv:101210515/csv:10122…	52	25	CsaV3_5G030340/CsaV3_1G000010/CsaV3_6G034270/CsaV3_1G032790/CsaV3_5G006630/CsaV3_3G032360/CsaV3_2G012650/CsaV3_6G002550/CsaV3_6G032340/CsaV3_3G026840/CsaV3_1G038800/CsaV3_5G001000/CsaV3_6G004350/CsaV3_5G006850/CsaV3_6G041770/CsaV3_6G017200/CsaV3_2G013510/CsaV3_1G014820/CsaV3_2G004340/CsaV3_3G017840/CsaV3_5G023800/CsaV3_2G006750/CsaV3_2G033220/CsaV3_2G032350/novel.390	27	CsaV3_4G007890/CsaV3_4G031980/CsaV3_3G015690/CsaV3_7G018640/CsaV3_3G008690/CsaV3_3G039740/CsaV3_3G035560/CsaV3_3G012980/CsaV3_3G007620/CsaV3_2G008580/CsaV3_UNG210040/CsaV3_3G032030/CsaV3_3G025040/CsaV3_1G045700/CsaV3_3G002360/CsaV3_3G045380/CsaV3_7G021070/CsaV3_6G006340/CsaV3_2G016760/CsaV3_3G035460/CsaV3_4G009740/CsaV3_6G050830/CsaV3_7G030740/CsaV3_1G029200/CsaV3_4G033460/CsaV3_1G040010/CsaV3_3G…
csv03050	Proteasome	3/1171	48/4131	0.99998	0.99998	CsaV3_4G025590/CsaV3_3G001250/CsaV3_5G030400	CsaV3_4G025590/CsaV3_3G001250/CsaV3_5G030400	csv:101216188/csv:101208086/csv:101210332	3	0		3	CsaV3_4G025590/CsaV3_3G001250/CsaV3_5G030400

## Sheet: XS_vs_XN common KEGG
KEGGID	Description	GeneRatio	BgRatio	pvalue	padj	geneID	geneName	keggID	Count
csv00196	Photosynthesis - antenna proteins	12816	19/3919	0.0120474	0.227962	CsaV3_5G039350/CsaV3_7G002620	CsaV3_5G039350/CsaV3_7G002620	csv:101218137/csv:101212963	2
csv04016	MAPK signaling pathway - plant	12875	125/3919	0.0240527	0.227962	CsaV3_2G002930/CsaV3_3G001710/CsaV3_4G030060/CsaV3_7G026460	CsaV3_2G002930/CsaV3_3G001710/CsaV3_4G030060/CsaV3_7G026460	csv:101220113/csv:101205372/csv:101209540/csv:101223223	4
csv00906	Carotenoid biosynthesis	12816	28/3919	0.0253291	0.227962	CsaV3_4G007140/CsaV3_4G007180	CsaV3_4G007140/CsaV3_4G007180	csv:101212508/csv:101220226	2
csv00920	Sulfur metabolism	12816	28/3919	0.0253291	0.227962	CsaV3_6G000650/CsaV3_7G018620	CsaV3_6G000650/CsaV3_7G018620	csv:101220896/csv:101213467	2
csv00195	Photosynthesis	12816	51/3919	0.0752498	0.541798	CsaV3_1G011330/CsaV3_4G007600	CsaV3_1G011330/CsaV3_4G007600	csv:101209135/csv:101215781	2
csv00511	Other glycan degradation	12785	16/3919	0.13395	0.56384	CsaV3_5G039980	CsaV3_5G039980	csv:101204709	1
csv04626	Plant-pathogen interaction	12844	149/3919	0.146162	0.56384	CsaV3_1G004290/CsaV3_5G033780/CsaV3_6G039330	CsaV3_1G004290/CsaV3_5G033780/CsaV3_6G039330	csv:101220025/csv:101207390/csv:101212721	3
csv00600	Sphingolipid metabolism	12785	19/3919	0.157046	0.56384	CsaV3_5G039980	CsaV3_5G039980	csv:101204709	1
csv00270	Cysteine and methionine metabolism	12816	96/3919	0.21101	0.56384	CsaV3_6G000650/CsaV3_7G018620	CsaV3_6G000650/CsaV3_7G018620	csv:101220896/csv:101213467	2
csv04712	Circadian rhythm - plant	12785	30/3919	0.236723	0.56384	CsaV3_3G015190	CsaV3_3G015190	csv:101212197	1
csv03430	Mismatch repair	12785	31/3919	0.243592	0.56384	CsaV3_6G046400	CsaV3_6G046400	csv:101218071	1
csv04075	Plant hormone signal transduction	12844	192/3919	0.244275	0.56384	CsaV3_2G002930/CsaV3_3G001710/CsaV3_4G030060	CsaV3_2G002930/CsaV3_3G001710/CsaV3_4G030060	csv:101220113/csv:101205372/csv:101209540	3
csv00061	Fatty acid biosynthesis	12785	32/3919	0.250402	0.56384	CsaV3_6G001070	CsaV3_6G001070	csv:101212704	1
csv00510	N-Glycan biosynthesis	12785	33/3919	0.257151	0.56384	CsaV3_5G031040	CsaV3_5G031040	csv:101222690	1
csv01230	Biosynthesis of amino acids	12844	201/3919	0.266218	0.56384	CsaV3_5G034910/CsaV3_6G000650/CsaV3_7G018620	CsaV3_5G034910/CsaV3_6G000650/CsaV3_7G018620	csv:101211316/csv:101220896/csv:101213467	3
csv03030	DNA replication	12785	40/3919	0.302773	0.56384	CsaV3_6G046400	CsaV3_6G046400	csv:101218071	1
csv00130	Ubiquinone and other terpenoid-quinone biosynthesis	12785	43/3919	0.321481	0.56384	CsaV3_5G031500	CsaV3_5G031500	csv:101216706	1
csv00240	Pyrimidine metabolism	12785	45/3919	0.333681	0.56384	CsaV3_3G011970	CsaV3_3G011970	csv:101207880	1
csv00410	beta-Alanine metabolism	12785	45/3919	0.333681	0.56384	CsaV3_2G001470	CsaV3_2G001470	csv:101205432	1
csv00030	Pentose phosphate pathway	12785	48/3919	0.351583	0.56384	CsaV3_5G034910	CsaV3_5G034910	csv:101211316	1
csv00330	Arginine and proline metabolism	12785	49/3919	0.357446	0.56384	CsaV3_2G001470	CsaV3_2G001470	csv:101205432	1
csv03420	Nucleotide excision repair	12785	49/3919	0.357446	0.56384	CsaV3_6G046400	CsaV3_6G046400	csv:101218071	1
csv01200	Carbon metabolism	12844	245/3919	0.375808	0.56384	CsaV3_5G034910/CsaV3_6G000650/CsaV3_7G018620	CsaV3_5G034910/CsaV3_6G000650/CsaV3_7G018620	csv:101211316/csv:101220896/csv:101213467	3
csv00071	Fatty acid degradation	12785	55/3919	0.391556	0.56384	CsaV3_6G001070	CsaV3_6G001070	csv:101212704	1
csv00460	Cyanoamino acid metabolism	12785	55/3919	0.391556	0.56384	CsaV3_6G000650	CsaV3_6G000650	csv:101220896	1
csv01212	Fatty acid metabolism	12785	60/3919	0.418631	0.579643	CsaV3_6G001070	CsaV3_6G001070	csv:101212704	1
csv03018	RNA degradation	12785	68/3919	0.459535	0.597165	CsaV3_6G038490	CsaV3_6G038490	csv:101219801	1
csv04146	Peroxisome	12785	73/3919	0.483665	0.597165	CsaV3_6G001070	CsaV3_6G001070	csv:101212704	1
csv00480	Glutathione metabolism	12785	74/3919	0.488364	0.597165	CsaV3_6G000030	CsaV3_6G000030	csv:101208623	1
csv00710	Carbon fixation in photosynthetic organisms	12785	76/3919	0.497637	0.597165	CsaV3_5G034910	CsaV3_5G034910	csv:101211316	1
csv00010	Glycolysis / Gluconeogenesis	12785	117/3919	0.655453	0.761171	CsaV3_6G050730	CsaV3_6G050730	csv:101217174	1
csv03040	Spliceosome	12785	129/3919	0.691695	0.778157	CsaV3_7G005550	CsaV3_7G005550	csv:101216712	1
csv00561	Glycerolipid metabolism	0/35	48/3919	1	1				0
csv00564	Glycerophospholipid metabolism	0/35	80/3919	1	1				0
csv04141	Protein processing in endoplasmic reticulum	0/35	115/3919	1	1				0
csv04144	Endocytosis	0/35	127/3919	1	1				0
