# Supplementary material for: Transcriptomic and Physiological Analyses Reveal Potential Genes Involved in Photoperiod-Regulated β-Carotene Accumulation Mechanisms in the Endocarp of Cucumber (Cucumis sativus L.) Fruit
Source: Int J Mol Sci. 2022 Oct 21;23(20):12650. doi: 10.3390/ijms232012650 (PMC9604348; doi:10.3390/ijms232012650)
Supplement: Supplementary file 1 [file ijms-23-12650-s001.zip › Supplementary datasheet S5_KEGG of DEGs between genotypes within specific photoperiod condition.xlsx]

## Sheet: XS_10vsCS_10DAP KEGG
KEGGID	Description	GeneRatio	BgRatio	pvalue	padj	geneID	geneName	keggID	Count	Up	Up_Gene_names	Down	Down_Gene_names
csv03010	Ribosome	192/2230	281/4159	1.48475e-07	1.69261e-05	novel.992/CsaV3_UNG232200/novel.376/CsaV3_4G004050/CsaV3_5G010420/CsaV3_3G012600/CsaV3_6G016780/CsaV3_5G006630/CsaV3_3G011000/CsaV3_5G030340/CsaV3_2G030730/CsaV3_2G032350/CsaV3_7G007910/CsaV3_5G006380/CsaV3_3G026840/CsaV3_2G034130/CsaV3_7G018640/CsaV3_6G034270/CsaV3_1G037420/CsaV3_6G050190/CsaV3_5G039260/CsaV3_1G014820/CsaV3_2G015470/CsaV3_2G006750/CsaV3_4G024340/CsaV3_6G014880/CsaV3_3G035460/Csa…	-/CsaV3_UNG232200/-/CsaV3_4G004050/CsaV3_5G010420/CsaV3_3G012600/CsaV3_6G016780/CsaV3_5G006630/CsaV3_3G011000/CsaV3_5G030340/CsaV3_2G030730/CsaV3_2G032350/CsaV3_7G007910/CsaV3_5G006380/CsaV3_3G026840/CsaV3_2G034130/CsaV3_7G018640/CsaV3_6G034270/CsaV3_1G037420/CsaV3_6G050190/CsaV3_5G039260/CsaV3_1G014820/CsaV3_2G015470/CsaV3_2G006750/CsaV3_4G024340/CsaV3_6G014880/CsaV3_3G035460/CsaV3_7G033310/CsaV…	csv:101208313/csv:101209853/csv:101208313/csv:101223231/csv:101205050/csv:101217711/csv:3429316/csv:101221575/csv:101213484/csv:101211875/csv:101210722/csv:101220340/csv:101211861/csv:101222172/csv:101218399/csv:101211246/csv:101213702/csv:101216990/csv:101212288/csv:101203536/csv:101216482/csv:101205570/csv:101211191/csv:101209626/csv:101223182/csv:101207758/csv:101212211/csv:101221537/csv:10120…	192	177	CsaV3_UNG232200/novel.376/CsaV3_4G004050/CsaV3_3G012600/CsaV3_6G016780/CsaV3_5G006630/CsaV3_3G011000/CsaV3_5G030340/CsaV3_2G030730/CsaV3_2G032350/CsaV3_7G007910/CsaV3_5G006380/CsaV3_3G026840/CsaV3_2G034130/CsaV3_7G018640/CsaV3_6G034270/CsaV3_1G037420/CsaV3_6G050190/CsaV3_5G039260/CsaV3_1G014820/CsaV3_2G015470/CsaV3_2G006750/CsaV3_4G024340/CsaV3_6G014880/CsaV3_3G035460/CsaV3_7G033310/CsaV3_3G03665…	15	novel.992/CsaV3_5G010420/novel.801/CsaV3_4G032310/CsaV3_3G038560/novel.917/CsaV3_7G021820/CsaV3_2G001630/CsaV3_5G038360/CsaV3_6G003760/CsaV3_6G040030/CsaV3_3G040630/CsaV3_3G036890/CsaV3_UNG050350/CsaV3_6G013470
csv00196	Photosynthesis - antenna proteins	17/2230	20/4159	0.00340273	0.142493	CsaV3_6G051520/CsaV3_6G013800/CsaV3_4G026100/CsaV3_6G051530/CsaV3_5G030270/CsaV3_3G005950/CsaV3_6G005340/CsaV3_5G025740/CsaV3_7G002620/CsaV3_1G043710/CsaV3_5G039350/CsaV3_1G002410/CsaV3_1G032510/CsaV3_1G019610/CsaV3_1G041230/CsaV3_4G037740/CsaV3_3G031580	CsaV3_6G051520/CsaV3_6G013800/CsaV3_4G026100/CsaV3_6G051530/CsaV3_5G030270/CsaV3_3G005950/CsaV3_6G005340/CsaV3_5G025740/CsaV3_7G002620/CsaV3_1G043710/CsaV3_5G039350/CsaV3_1G002410/CsaV3_1G032510/CsaV3_1G019610/CsaV3_1G041230/CsaV3_4G037740/CsaV3_3G031580	csv:101221671/csv:101213845/csv:101208740/csv:101222687/csv:101214055/csv:101207278/csv:101204705/csv:101211428/csv:101212963/csv:101202993/csv:101218137/csv:101222701/csv:101211276/csv:101204705/csv:101211430/csv:101209460/csv:101203342	17	15	CsaV3_6G051520/CsaV3_6G013800/CsaV3_4G026100/CsaV3_6G051530/CsaV3_5G030270/CsaV3_3G005950/CsaV3_6G005340/CsaV3_5G025740/CsaV3_7G002620/CsaV3_1G043710/CsaV3_5G039350/CsaV3_1G002410/CsaV3_1G032510/CsaV3_1G019610/CsaV3_3G031580	2	CsaV3_1G041230/CsaV3_4G037740
csv04075	Plant hormone signal transduction	132/2230	212/4159	0.0056434	0.142493	CsaV3_1G031430/CsaV3_2G004130/CsaV3_1G041950/CsaV3_1G026650/CsaV3_5G024480/CsaV3_7G006290/CsaV3_2G032070/CsaV3_4G037140/CsaV3_4G030260/CsaV3_6G004610/CsaV3_1G014770/CsaV3_3G040330/CsaV3_4G030060/CsaV3_6G044680/CsaV3_6G013600/CsaV3_3G011620/CsaV3_3G018270/CsaV3_2G015600/CsaV3_6G003360/CsaV3_5G011030/CsaV3_6G050970/CsaV3_3G046370/CsaV3_6G007970/CsaV3_4G006770/CsaV3_6G050480/CsaV3_5G031940/CsaV3_7G0…	CsaV3_1G031430/CsaV3_2G004130/CsaV3_1G041950/CsaV3_1G026650/CsaV3_5G024480/CsaV3_7G006290/CsaV3_2G032070/CsaV3_4G037140/CsaV3_4G030260/CsaV3_6G004610/CsaV3_1G014770/CsaV3_3G040330/CsaV3_4G030060/CsaV3_6G044680/CsaV3_6G013600/CsaV3_3G011620/CsaV3_3G018270/CsaV3_2G015600/CsaV3_6G003360/CsaV3_5G011030/CsaV3_6G050970/CsaV3_3G046370/CsaV3_6G007970/CsaV3_4G006770/CsaV3_6G050480/CsaV3_5G031940/CsaV3_7G0…	csv:101217606/csv:101223028/csv:101222720/csv:101203761/csv:101210839/csv:101216389/csv:101216639/csv:101216425/csv:101214088/csv:101214396/csv:101204604/csv:101220810/csv:101209540/csv:101221152/csv:101219677/csv:101223006/csv:101221213/csv:101212166/csv:101210308/csv:101208898/csv:101213806/csv:101208132/csv:101219164/csv:101213942/csv:101220018/csv:101209506/csv:101205805/csv:101203499/csv:101…	132	57	CsaV3_2G004130/CsaV3_4G037140/CsaV3_6G044680/CsaV3_3G011620/CsaV3_3G018270/CsaV3_2G015600/CsaV3_6G050970/CsaV3_3G046370/CsaV3_4G006770/CsaV3_6G050480/CsaV3_7G025380/CsaV3_7G000720/CsaV3_7G008310/CsaV3_3G045710/CsaV3_3G010190/CsaV3_4G002460/CsaV3_3G012660/CsaV3_2G033550/CsaV3_2G027990/CsaV3_2G015610/CsaV3_6G004560/CsaV3_5G023170/CsaV3_6G042190/CsaV3_2G004120/CsaV3_2G012400/CsaV3_4G030140/CsaV3_5G0…	75	CsaV3_1G031430/CsaV3_1G041950/CsaV3_1G026650/CsaV3_5G024480/CsaV3_7G006290/CsaV3_2G032070/CsaV3_4G030260/CsaV3_6G004610/CsaV3_1G014770/CsaV3_3G040330/CsaV3_4G030060/CsaV3_6G013600/CsaV3_6G003360/CsaV3_5G011030/CsaV3_6G007970/CsaV3_5G031940/CsaV3_3G043720/CsaV3_1G031060/CsaV3_1G042150/CsaV3_1G031420/CsaV3_3G015720/CsaV3_5G010560/CsaV3_3G008270/CsaV3_5G028350/CsaV3_1G041270/CsaV3_3G008140/CsaV3_6G0…
csv00600	Sphingolipid metabolism	18/2230	22/4159	0.00575689	0.142493	CsaV3_5G029180/CsaV3_5G039980/CsaV3_5G014080/CsaV3_5G010860/CsaV3_3G043840/CsaV3_6G049850/CsaV3_6G008140/CsaV3_5G004820/CsaV3_2G011410/CsaV3_6G016520/CsaV3_3G013580/CsaV3_3G010870/CsaV3_6G031740/CsaV3_1G000200/CsaV3_6G048550/CsaV3_2G010670/CsaV3_1G012180/CsaV3_5G036760	CsaV3_5G029180/CsaV3_5G039980/CsaV3_5G014080/CsaV3_5G010860/CsaV3_3G043840/CsaV3_6G049850/CsaV3_6G008140/CsaV3_5G004820/CsaV3_2G011410/CsaV3_6G016520/CsaV3_3G013580/CsaV3_3G010870/CsaV3_6G031740/CsaV3_1G000200/CsaV3_6G048550/CsaV3_2G010670/CsaV3_1G012180/CsaV3_5G036760	csv:101212167/csv:101204709/csv:101212019/csv:101210778/csv:101204972/csv:101206190/csv:101217975/csv:101222000/csv:101213022/csv:101208232/csv:101208848/csv:101212358/csv:101206698/csv:101209026/csv:101205550/csv:101203795/csv:101207762/csv:101217833	18	4	CsaV3_3G043840/CsaV3_5G004820/CsaV3_1G012180/CsaV3_5G036760	14	CsaV3_5G029180/CsaV3_5G039980/CsaV3_5G014080/CsaV3_5G010860/CsaV3_6G049850/CsaV3_6G008140/CsaV3_2G011410/CsaV3_6G016520/CsaV3_3G013580/CsaV3_3G010870/CsaV3_6G031740/CsaV3_1G000200/CsaV3_6G048550/CsaV3_2G010670
csv00500	Starch and sucrose metabolism	77/2230	118/4159	0.00624969	0.142493	CsaV3_3G022670/CsaV3_2G011150/CsaV3_2G033300/CsaV3_5G020420/CsaV3_1G041400/CsaV3_3G036980/CsaV3_1G036000/CsaV3_3G021590/CsaV3_1G046750/CsaV3_7G002310/CsaV3_2G001890/CsaV3_5G003970/CsaV3_1G005170/CsaV3_3G044560/CsaV3_5G033210/CsaV3_4G029230/CsaV3_6G031530/CsaV3_3G043060/CsaV3_4G008840/CsaV3_3G046790/CsaV3_1G032200/CsaV3_1G010740/CsaV3_2G014910/CsaV3_UNG144090/CsaV3_6G039140/CsaV3_2G001860/CsaV3_1G…	CsaV3_3G022670/CsaV3_2G011150/CsaV3_2G033300/CsaV3_5G020420/CsaV3_1G041400/CsaV3_3G036980/CsaV3_1G036000/CsaV3_3G021590/CsaV3_1G046750/CsaV3_7G002310/CsaV3_2G001890/CsaV3_5G003970/CsaV3_1G005170/CsaV3_3G044560/CsaV3_5G033210/CsaV3_4G029230/CsaV3_6G031530/CsaV3_3G043060/CsaV3_4G008840/CsaV3_3G046790/CsaV3_1G032200/CsaV3_1G010740/CsaV3_2G014910/CsaV3_UNG144090/CsaV3_6G039140/CsaV3_2G001860/CsaV3_1G…	csv:101217315/csv:101208942/csv:101220898/csv:101211461/csv:101213767/csv:101210586/csv:101214999/csv:101213621/csv:101216685/csv:101216573/csv:101218300/csv:101215227/csv:101216865/csv:101215384/csv:101221746/csv:101216247/csv:101215687/csv:101223112/csv:101221832/csv:101202827/csv:101205766/csv:101213925/csv:101208904/csv:101217677/csv:101208701/csv:101218300/csv:101213690/csv:101213366/csv:101…	77	43	CsaV3_2G011150/CsaV3_3G036980/CsaV3_3G021590/CsaV3_7G002310/CsaV3_2G001890/CsaV3_5G003970/CsaV3_1G005170/CsaV3_6G031530/CsaV3_4G008840/CsaV3_1G032200/CsaV3_1G010740/CsaV3_2G014910/CsaV3_6G039140/CsaV3_1G032890/CsaV3_3G045830/CsaV3_7G029570/CsaV3_5G028270/CsaV3_3G045370/CsaV3_1G010680/CsaV3_3G021110/CsaV3_2G017550/CsaV3_1G012560/CsaV3_4G004750/CsaV3_3G041330/CsaV3_3G037440/CsaV3_2G024360/CsaV3_1G0…	34	CsaV3_3G022670/CsaV3_2G033300/CsaV3_5G020420/CsaV3_1G041400/CsaV3_1G036000/CsaV3_1G046750/CsaV3_3G044560/CsaV3_5G033210/CsaV3_4G029230/CsaV3_3G043060/CsaV3_3G046790/CsaV3_UNG144090/CsaV3_2G001860/CsaV3_6G006740/CsaV3_1G007040/CsaV3_5G031700/CsaV3_2G015270/CsaV3_3G006840/CsaV3_5G005580/CsaV3_4G037030/CsaV3_6G000500/CsaV3_1G022900/CsaV3_1G001640/CsaV3_2G028640/CsaV3_3G013570/CsaV3_7G021990/CsaV3_6G…
csv00010	Glycolysis / Gluconeogenesis	71/2230	113/4159	0.0284029	0.49417	CsaV3_3G048280/CsaV3_7G024990/CsaV3_5G029170/CsaV3_6G031750/CsaV3_6G050730/CsaV3_6G048080/CsaV3_6G000070/CsaV3_1G001600/CsaV3_2G017260/CsaV3_2G001890/CsaV3_7G024950/CsaV3_3G033550/CsaV3_6G004010/CsaV3_3G036910/CsaV3_4G025310/CsaV3_2G015280/CsaV3_3G008370/CsaV3_4G025330/CsaV3_6G040340/CsaV3_6G045610/CsaV3_1G016950/CsaV3_4G006350/CsaV3_6G044640/CsaV3_3G015070/CsaV3_6G039140/CsaV3_5G010430/CsaV3_2G0…	CsaV3_3G048280/CsaV3_7G024990/CsaV3_5G029170/CsaV3_6G031750/CsaV3_6G050730/CsaV3_6G048080/CsaV3_6G000070/CsaV3_1G001600/CsaV3_2G017260/CsaV3_2G001890/CsaV3_7G024950/CsaV3_3G033550/CsaV3_6G004010/CsaV3_3G036910/CsaV3_4G025310/CsaV3_2G015280/CsaV3_3G008370/CsaV3_4G025330/CsaV3_6G040340/CsaV3_6G045610/CsaV3_1G016950/CsaV3_4G006350/CsaV3_6G044640/CsaV3_3G015070/CsaV3_6G039140/CsaV3_5G010430/CsaV3_2G0…	csv:101222382/csv:101206036/csv:101212411/csv:101212881/csv:101217174/csv:101211230/csv:101207718/csv:101209430/csv:101209304/csv:101218300/csv:101209854/csv:101207963/csv:101205576/csv:101209429/csv:101210436/csv:101204323/csv:101213965/csv:101209936/csv:101207102/csv:101211596/csv:101222828/csv:101205699/csv:101220209/csv:101209903/csv:101208701/csv:101205760/csv:101218300/csv:101205566/csv:101…	71	35	CsaV3_6G000070/CsaV3_2G017260/CsaV3_2G001890/CsaV3_4G025330/CsaV3_6G045610/CsaV3_1G016950/CsaV3_6G039140/CsaV3_3G015370/CsaV3_3G045830/CsaV3_1G032330/CsaV3_2G013320/CsaV3_3G021780/CsaV3_6G013500/CsaV3_2G012240/CsaV3_6G001210/CsaV3_5G031990/CsaV3_2G012250/CsaV3_4G025300/CsaV3_6G007280/CsaV3_7G024980/CsaV3_7G006840/CsaV3_5G034210/CsaV3_1G007740/CsaV3_2G001900/CsaV3_4G025320/CsaV3_4G005770/CsaV3_5G0…	36	CsaV3_3G048280/CsaV3_7G024990/CsaV3_5G029170/CsaV3_6G031750/CsaV3_6G050730/CsaV3_6G048080/CsaV3_1G001600/CsaV3_7G024950/CsaV3_3G033550/CsaV3_6G004010/CsaV3_3G036910/CsaV3_4G025310/CsaV3_2G015280/CsaV3_3G008370/CsaV3_6G040340/CsaV3_4G006350/CsaV3_6G044640/CsaV3_3G015070/CsaV3_5G010430/CsaV3_2G001860/CsaV3_2G032870/CsaV3_2G003650/CsaV3_6G040390/CsaV3_1G039980/CsaV3_1G009420/CsaV3_2G004110/CsaV3_7G0…
csv00592	alpha-Linolenic acid metabolism	41/2230	62/4159	0.0303438	0.49417	CsaV3_3G042140/CsaV3_7G024990/novel.506/CsaV3_7G024950/CsaV3_5G035840/CsaV3_4G023930/CsaV3_2G033050/CsaV3_3G011240/CsaV3_7G026290/CsaV3_4G027880/CsaV3_2G011380/CsaV3_5G039150/CsaV3_2G034560/CsaV3_2G002170/CsaV3_4G037110/CsaV3_6G023960/CsaV3_4G023920/CsaV3_1G040870/CsaV3_3G045390/CsaV3_5G004440/CsaV3_3G000680/CsaV3_4G023830/CsaV3_UNG144110/CsaV3_6G025240/CsaV3_6G023910/CsaV3_7G024980/CsaV3_7G00341…	CsaV3_3G042140/CsaV3_7G024990/-/CsaV3_7G024950/CsaV3_5G035840/CsaV3_4G023930/CsaV3_2G033050/CsaV3_3G011240/CsaV3_7G026290/CsaV3_4G027880/CsaV3_2G011380/CsaV3_5G039150/CsaV3_2G034560/CsaV3_2G002170/CsaV3_4G037110/CsaV3_6G023960/CsaV3_4G023920/CsaV3_1G040870/CsaV3_3G045390/CsaV3_5G004440/CsaV3_3G000680/CsaV3_4G023830/CsaV3_UNG144110/CsaV3_6G025240/CsaV3_6G023910/CsaV3_7G024980/CsaV3_7G003410/CsaV3_…	csv:101218397/csv:101206036/csv:101214880/csv:101209854/csv:101206690/csv:101209041/csv:101203714/csv:101217710/csv:101209067/csv:101220288/csv:101212301/csv:101213826/csv:101220632/csv:101209359/csv:101221396/csv:101218899/csv:101214639/csv:101207593/csv:101220850/csv:101222521/csv:101211109/csv:101216079/csv:101218159/csv:101218899/csv:101218899/csv:101209854/csv:101223126/csv:101218631/csv:101…	41	14	CsaV3_3G042140/novel.506/CsaV3_2G034560/CsaV3_6G023960/CsaV3_4G023920/CsaV3_UNG144110/CsaV3_6G025240/CsaV3_7G024980/CsaV3_3G042120/CsaV3_5G017240/CsaV3_6G025310/CsaV3_2G010330/CsaV3_6G024110/CsaV3_7G024960	27	CsaV3_7G024990/CsaV3_7G024950/CsaV3_5G035840/CsaV3_4G023930/CsaV3_2G033050/CsaV3_3G011240/CsaV3_7G026290/CsaV3_4G027880/CsaV3_2G011380/CsaV3_5G039150/CsaV3_2G002170/CsaV3_4G037110/CsaV3_1G040870/CsaV3_3G045390/CsaV3_5G004440/CsaV3_3G000680/CsaV3_4G023830/CsaV3_6G023910/CsaV3_7G003410/CsaV3_7G026280/CsaV3_4G037360/novel.818/CsaV3_2G028330/CsaV3_6G022310/CsaV3_5G030460/CsaV3_7G006670/CsaV3_3G042130
csv00230	Purine metabolism	52/2230	83/4159	0.0592062	0.73837	CsaV3_3G012820/CsaV3_5G029170/CsaV3_1G009350/CsaV3_6G040340/CsaV3_3G000810/CsaV3_1G016950/CsaV3_1G009500/CsaV3_3G035840/CsaV3_4G006620/CsaV3_3G006560/CsaV3_4G011640/CsaV3_3G015600/CsaV3_5G004020/CsaV3_2G013320/CsaV3_3G021780/CsaV3_2G010660/CsaV3_6G042080/CsaV3_2G032170/CsaV3_3G013820/CsaV3_2G013360/CsaV3_3G013810/CsaV3_7G023050/CsaV3_6G049150/CsaV3_1G012190/CsaV3_3G027630/CsaV3_6G019130/CsaV3_3G0…	CsaV3_3G012820/CsaV3_5G029170/CsaV3_1G009350/CsaV3_6G040340/CsaV3_3G000810/CsaV3_1G016950/CsaV3_1G009500/CsaV3_3G035840/CsaV3_4G006620/CsaV3_3G006560/CsaV3_4G011640/CsaV3_3G015600/CsaV3_5G004020/CsaV3_2G013320/CsaV3_3G021780/CsaV3_2G010660/CsaV3_6G042080/CsaV3_2G032170/CsaV3_3G013820/CsaV3_2G013360/CsaV3_3G013810/CsaV3_7G023050/CsaV3_6G049150/CsaV3_1G012190/CsaV3_3G027630/CsaV3_6G019130/CsaV3_3G0…	csv:101221111/csv:101212411/csv:101212831/csv:101207102/csv:101215130/csv:101222828/csv:101214286/csv:101218678/csv:101210301/csv:101209253/csv:101212263/csv:101206232/csv:101216186/csv:101218017/csv:101206887/csv:101203551/csv:101210105/csv:101215432/csv:105434415/csv:101218495/csv:101212920/csv:101217193/csv:101217089/csv:101208006/csv:101222416/csv:101218429/csv:101220971/csv:101203230/csv:101…	52	22	CsaV3_1G009350/CsaV3_3G000810/CsaV3_1G016950/CsaV3_1G009500/CsaV3_3G035840/CsaV3_3G015600/CsaV3_2G013320/CsaV3_3G021780/CsaV3_6G042080/CsaV3_6G049150/CsaV3_1G012190/CsaV3_3G027630/CsaV3_3G038770/CsaV3_6G021640/CsaV3_1G000690/CsaV3_5G010490/CsaV3_3G007170/CsaV3_7G034430/CsaV3_6G004900/CsaV3_2G026200/CsaV3_5G002770/CsaV3_1G010170	30	CsaV3_3G012820/CsaV3_5G029170/CsaV3_6G040340/CsaV3_4G006620/CsaV3_3G006560/CsaV3_4G011640/CsaV3_5G004020/CsaV3_2G010660/CsaV3_2G032170/CsaV3_3G013820/CsaV3_2G013360/CsaV3_3G013810/CsaV3_7G023050/CsaV3_6G019130/CsaV3_2G003460/CsaV3_3G043250/CsaV3_3G010120/CsaV3_3G004750/CsaV3_1G042760/CsaV3_1G016970/CsaV3_5G008870/CsaV3_1G010130/CsaV3_6G004680/CsaV3_4G026330/CsaV3_6G053020/CsaV3_4G024410/CsaV3_6G0…
csv00511	Other glycan degradation	120866	16/4159	0.0689811	0.73837	CsaV3_5G039980/CsaV3_5G001420/CsaV3_5G014080/CsaV3_3G043840/CsaV3_3G018140/CsaV3_5G010500/CsaV3_2G011410/CsaV3_5G010510/CsaV3_2G009420/CsaV3_6G047280/CsaV3_6G014250/CsaV3_5G036760	CsaV3_5G039980/CsaV3_5G001420/CsaV3_5G014080/CsaV3_3G043840/CsaV3_3G018140/CsaV3_5G010500/CsaV3_2G011410/CsaV3_5G010510/CsaV3_2G009420/CsaV3_6G047280/CsaV3_6G014250/CsaV3_5G036760	csv:101204709/csv:101211186/csv:101212019/csv:101204972/csv:101204534/csv:101203831/csv:101213022/csv:101203587/csv:101211792/csv:101221354/csv:101219734/csv:101217833	12	6	CsaV3_3G043840/CsaV3_3G018140/CsaV3_5G010500/CsaV3_5G010510/CsaV3_2G009420/CsaV3_5G036760	6	CsaV3_5G039980/CsaV3_5G001420/CsaV3_5G014080/CsaV3_2G011410/CsaV3_6G047280/CsaV3_6G014250
csv00561	Glycerolipid metabolism	39/2230	62/4159	0.0880764	0.73837	CsaV3_2G033910/CsaV3_5G029180/CsaV3_1G010300/CsaV3_7G034580/CsaV3_5G006640/CsaV3_1G001600/CsaV3_3G015560/CsaV3_5G010860/CsaV3_4G025310/CsaV3_6G014580/CsaV3_1G011950/CsaV3_4G025330/CsaV3_4G027880/CsaV3_3G009130/CsaV3_6G000600/CsaV3_3G048840/CsaV3_7G032210/CsaV3_2G004110/CsaV3_4G024550/CsaV3_7G001740/CsaV3_2G028420/CsaV3_3G035210/CsaV3_4G025300/CsaV3_6G012360/CsaV3_2G008260/CsaV3_5G034650/CsaV3_4G0…	CsaV3_2G033910/CsaV3_5G029180/CsaV3_1G010300/CsaV3_7G034580/CsaV3_5G006640/CsaV3_1G001600/CsaV3_3G015560/CsaV3_5G010860/CsaV3_4G025310/CsaV3_6G014580/CsaV3_1G011950/CsaV3_4G025330/CsaV3_4G027880/CsaV3_3G009130/CsaV3_6G000600/CsaV3_3G048840/CsaV3_7G032210/CsaV3_2G004110/CsaV3_4G024550/CsaV3_7G001740/CsaV3_2G028420/CsaV3_3G035210/CsaV3_4G025300/CsaV3_6G012360/CsaV3_2G008260/CsaV3_5G034650/CsaV3_4G0…	csv:101213816/csv:101212167/csv:101208763/csv:101222563/csv:101204152/csv:101209430/csv:101205287/csv:101210778/csv:101210436/csv:101215610/csv:101206306/csv:101209936/csv:101220288/csv:101204668/csv:101221758/csv:101213494/csv:101210335/csv:101202756/csv:101210022/csv:101211796/csv:101220795/csv:101209025/csv:101210436/csv:101210099/csv:101217776/csv:101216053/csv:101208634/csv:101215754/csv:101…	39	13	CsaV3_5G006640/CsaV3_1G011950/CsaV3_4G025330/CsaV3_3G009130/CsaV3_6G000600/CsaV3_3G048840/CsaV3_3G035210/CsaV3_4G025300/CsaV3_4G035660/CsaV3_6G001960/CsaV3_3G034040/CsaV3_4G025320/CsaV3_7G032960	26	CsaV3_2G033910/CsaV3_5G029180/CsaV3_1G010300/CsaV3_7G034580/CsaV3_1G001600/CsaV3_3G015560/CsaV3_5G010860/CsaV3_4G025310/CsaV3_6G014580/CsaV3_4G027880/CsaV3_7G032210/CsaV3_2G004110/CsaV3_4G024550/CsaV3_7G001740/CsaV3_2G028420/CsaV3_6G012360/CsaV3_2G008260/CsaV3_5G034650/CsaV3_5G039220/CsaV3_6G041120/CsaV3_3G039170/CsaV3_3G005860/CsaV3_5G023050/CsaV3_2G030770/CsaV3_2G003280/CsaV3_7G034360
csv00730	Thiamine metabolism	16/2230	23/4159	0.0908197	0.73837	CsaV3_3G005340/CsaV3_1G036050/CsaV3_3G006930/CsaV3_6G044470/CsaV3_2G031800/CsaV3_6G022370/CsaV3_1G009500/CsaV3_7G029140/CsaV3_2G003460/CsaV3_1G000690/CsaV3_6G004680/CsaV3_1G031250/CsaV3_4G024410/CsaV3_5G012850/CsaV3_6G005620/CsaV3_3G027210	CsaV3_3G005340/CsaV3_1G036050/CsaV3_3G006930/CsaV3_6G044470/CsaV3_2G031800/CsaV3_6G022370/CsaV3_1G009500/CsaV3_7G029140/CsaV3_2G003460/CsaV3_1G000690/CsaV3_6G004680/CsaV3_1G031250/CsaV3_4G024410/CsaV3_5G012850/CsaV3_6G005620/CsaV3_3G027210	csv:101211553/csv:101213554/csv:101218190/csv:101218146/csv:101220427/csv:101209552/csv:101214286/csv:101210895/csv:101203230/csv:101216714/csv:101215517/csv:101207760/csv:101221997/csv:101222631/csv:101214927/csv:101217918	16	6	CsaV3_6G044470/CsaV3_2G031800/CsaV3_1G009500/CsaV3_1G000690/CsaV3_5G012850/CsaV3_6G005620	10	CsaV3_3G005340/CsaV3_1G036050/CsaV3_3G006930/CsaV3_6G022370/CsaV3_7G029140/CsaV3_2G003460/CsaV3_6G004680/CsaV3_1G031250/CsaV3_4G024410/CsaV3_3G027210
csv00052	Galactose metabolism	30/2230	47/4159	0.10238	0.73837	CsaV3_5G029180/CsaV3_6G048080/CsaV3_1G046750/CsaV3_2G001890/CsaV3_5G003970/CsaV3_5G010860/CsaV3_4G011820/CsaV3_4G033560/CsaV3_4G006660/CsaV3_5G003160/CsaV3_6G039140/CsaV3_2G001860/CsaV3_1G008720/CsaV3_5G001840/CsaV3_3G043840/CsaV3_3G045830/CsaV3_1G039980/CsaV3_3G021110/CsaV3_3G031720/CsaV3_3G023460/CsaV3_3G037440/CsaV3_2G024360/CsaV3_5G005910/CsaV3_1G015730/CsaV3_6G000050/CsaV3_3G009370/CsaV3_3G0…	CsaV3_5G029180/CsaV3_6G048080/CsaV3_1G046750/CsaV3_2G001890/CsaV3_5G003970/CsaV3_5G010860/CsaV3_4G011820/CsaV3_4G033560/CsaV3_4G006660/CsaV3_5G003160/CsaV3_6G039140/CsaV3_2G001860/CsaV3_1G008720/CsaV3_5G001840/CsaV3_3G043840/CsaV3_3G045830/CsaV3_1G039980/CsaV3_3G021110/CsaV3_3G031720/CsaV3_3G023460/CsaV3_3G037440/CsaV3_2G024360/CsaV3_5G005910/CsaV3_1G015730/CsaV3_6G000050/CsaV3_3G009370/CsaV3_3G0…	csv:101212167/csv:101211230/csv:101216685/csv:101218300/csv:101215227/csv:101210778/csv:101211538/csv:101214893/csv:101209558/csv:101203400/csv:101208701/csv:101218300/csv:101204256/csv:101205820/csv:101204972/csv:101216058/csv:101202739/csv:101220298/csv:101208180/csv:101220704/csv:101223138/csv:101214883/csv:101207009/csv:101215109/csv:101208382/csv:101208525/csv:101217277/csv:101219465/csv:101…	30	17	CsaV3_2G001890/CsaV3_5G003970/CsaV3_4G011820/CsaV3_6G039140/CsaV3_1G008720/CsaV3_5G001840/CsaV3_3G043840/CsaV3_3G045830/CsaV3_3G021110/CsaV3_3G031720/CsaV3_3G037440/CsaV3_2G024360/CsaV3_5G005910/CsaV3_1G015730/CsaV3_3G009370/CsaV3_2G001900/CsaV3_5G036760	13	CsaV3_5G029180/CsaV3_6G048080/CsaV3_1G046750/CsaV3_5G010860/CsaV3_4G033560/CsaV3_4G006660/CsaV3_5G003160/CsaV3_2G001860/CsaV3_1G039980/CsaV3_3G023460/CsaV3_6G000050/CsaV3_3G042690/CsaV3_4G008960
csv04712	Circadian rhythm - plant	20/2230	30/4159	0.104003	0.73837	CsaV3_3G015190/CsaV3_6G005020/CsaV3_5G020710/CsaV3_7G024490/CsaV3_6G044000/CsaV3_5G014370/CsaV3_2G008460/CsaV3_3G047490/CsaV3_2G025750/CsaV3_6G036100/CsaV3_4G024430/CsaV3_3G050020/CsaV3_1G005680/CsaV3_2G031960/CsaV3_3G049750/CsaV3_1G044210/CsaV3_2G026240/CsaV3_7G002530/CsaV3_2G007370/CsaV3_6G015450	CsaV3_3G015190/CsaV3_6G005020/CsaV3_5G020710/CsaV3_7G024490/CsaV3_6G044000/CsaV3_5G014370/CsaV3_2G008460/CsaV3_3G047490/CsaV3_2G025750/CsaV3_6G036100/CsaV3_4G024430/CsaV3_3G050020/CsaV3_1G005680/CsaV3_2G031960/CsaV3_3G049750/CsaV3_1G044210/CsaV3_2G026240/CsaV3_7G002530/CsaV3_2G007370/CsaV3_6G015450	csv:101212197/csv:101220984/csv:101214586/csv:101216952/csv:101205903/csv:101222712/csv:101222265/csv:101213649/csv:101203735/csv:101208491/csv:101210765/csv:101214341/csv:101220107/csv:101218051/csv:101211694/csv:101207969/csv:101207500/csv:101211915/csv:101216738/csv:101210608	20	9	CsaV3_3G015190/CsaV3_5G020710/CsaV3_7G024490/CsaV3_6G036100/CsaV3_3G050020/CsaV3_2G031960/CsaV3_2G026240/CsaV3_7G002530/CsaV3_6G015450	11	CsaV3_6G005020/CsaV3_6G044000/CsaV3_5G014370/CsaV3_2G008460/CsaV3_3G047490/CsaV3_2G025750/CsaV3_4G024430/CsaV3_1G005680/CsaV3_3G049750/CsaV3_1G044210/CsaV3_2G007370
csv00250	Alanine, aspartate and glutamate metabolism	34/2230	54/4159	0.105375	0.73837	CsaV3_4G007370/CsaV3_5G023920/CsaV3_1G039010/CsaV3_5G031200/CsaV3_2G010560/CsaV3_4G007380/CsaV3_7G030560/CsaV3_1G000670/CsaV3_3G031010/CsaV3_5G027390/CsaV3_3G021030/CsaV3_4G035950/CsaV3_3G033240/CsaV3_7G033940/CsaV3_4G004380/CsaV3_5G020650/CsaV3_4G013270/CsaV3_3G047470/CsaV3_4G026970/CsaV3_6G013440/CsaV3_4G034720/CsaV3_4G013280/CsaV3_1G009560/CsaV3_5G008870/CsaV3_4G004900/CsaV3_3G027930/CsaV3_2G0…	CsaV3_4G007370/CsaV3_5G023920/CsaV3_1G039010/CsaV3_5G031200/CsaV3_2G010560/CsaV3_4G007380/CsaV3_7G030560/CsaV3_1G000670/CsaV3_3G031010/CsaV3_5G027390/CsaV3_3G021030/CsaV3_4G035950/CsaV3_3G033240/CsaV3_7G033940/CsaV3_4G004380/CsaV3_5G020650/CsaV3_4G013270/CsaV3_3G047470/CsaV3_4G026970/CsaV3_6G013440/CsaV3_4G034720/CsaV3_4G013280/CsaV3_1G009560/CsaV3_5G008870/CsaV3_4G004900/CsaV3_3G027930/CsaV3_2G0…	csv:101211530/csv:101215515/csv:101208927/csv:101213570/csv:101222628/csv:101220932/csv:101213413/csv:101215982/csv:101207254/csv:101205815/csv:101221473/csv:101213917/csv:101203709/csv:101212146/csv:101202786/csv:101216119/csv:101221948/csv:101213892/csv:101210304/csv:101217352/csv:101218064/csv:101221948/csv:101215247/csv:101209967/csv:101208662/csv:101213224/csv:101207914/csv:101219660/csv:101…	34	12	CsaV3_2G010560/CsaV3_5G027390/CsaV3_4G004380/CsaV3_4G026970/CsaV3_6G013440/CsaV3_4G013280/CsaV3_1G009560/CsaV3_4G004900/CsaV3_3G027930/CsaV3_3G004920/CsaV3_5G017320/CsaV3_6G031950	22	CsaV3_4G007370/CsaV3_5G023920/CsaV3_1G039010/CsaV3_5G031200/CsaV3_4G007380/CsaV3_7G030560/CsaV3_1G000670/CsaV3_3G031010/CsaV3_3G021030/CsaV3_4G035950/CsaV3_3G033240/CsaV3_7G033940/CsaV3_5G020650/CsaV3_4G013270/CsaV3_3G047470/CsaV3_4G034720/CsaV3_5G008870/CsaV3_2G024880/CsaV3_4G032320/CsaV3_1G013270/CsaV3_5G005130/CsaV3_6G039090
csv00780	Biotin metabolism	120775	825419	0.114378	0.73837	CsaV3_1G031330/CsaV3_3G043300/CsaV3_4G023750/CsaV3_4G004790/CsaV3_1G042350/CsaV3_1G041340/CsaV3_6G003770/CsaV3_1G032580/CsaV3_2G025310	CsaV3_1G031330/CsaV3_3G043300/CsaV3_4G023750/CsaV3_4G004790/CsaV3_1G042350/CsaV3_1G041340/CsaV3_6G003770/CsaV3_1G032580/CsaV3_2G025310	csv:101216016/csv:101205498/csv:101210519/csv:101207195/csv:101217385/csv:101213530/csv:101222084/csv:101210781/csv:101221932	9	8	CsaV3_1G031330/CsaV3_4G023750/CsaV3_4G004790/CsaV3_1G042350/CsaV3_1G041340/CsaV3_6G003770/CsaV3_1G032580/CsaV3_2G025310	1	CsaV3_3G043300
csv03430	Mismatch repair	21/2230	32/4159	0.116579	0.73837	CsaV3_3G017020/CsaV3_2G002320/CsaV3_1G002970/CsaV3_3G046980/CsaV3_6G016510/CsaV3_1G006450/CsaV3_1G032850/CsaV3_7G029930/CsaV3_6G038660/CsaV3_3G038830/CsaV3_4G010360/CsaV3_5G035370/CsaV3_6G014300/CsaV3_4G033030/CsaV3_7G029150/CsaV3_6G002720/CsaV3_4G031600/CsaV3_5G008820/CsaV3_3G003530/CsaV3_1G003630/CsaV3_3G000200	CsaV3_3G017020/CsaV3_2G002320/CsaV3_1G002970/CsaV3_3G046980/CsaV3_6G016510/CsaV3_1G006450/CsaV3_1G032850/CsaV3_7G029930/CsaV3_6G038660/CsaV3_3G038830/CsaV3_4G010360/CsaV3_5G035370/CsaV3_6G014300/CsaV3_4G033030/CsaV3_7G029150/CsaV3_6G002720/CsaV3_4G031600/CsaV3_5G008820/CsaV3_3G003530/CsaV3_1G003630/CsaV3_3G000200	csv:101214720/csv:101210755/csv:101208545/csv:101220176/csv:101208473/csv:101210420/csv:101214177/csv:101219303/csv:101204361/csv:101221438/csv:101216298/csv:101205315/csv:101213447/csv:101202933/csv:101210654/csv:101211816/csv:101221072/csv:101213310/csv:101208984/csv:101215589/csv:101213777	21	17	CsaV3_2G002320/CsaV3_1G002970/CsaV3_3G046980/CsaV3_6G016510/CsaV3_1G006450/CsaV3_1G032850/CsaV3_7G029930/CsaV3_3G038830/CsaV3_5G035370/CsaV3_6G014300/CsaV3_4G033030/CsaV3_7G029150/CsaV3_4G031600/CsaV3_5G008820/CsaV3_3G003530/CsaV3_1G003630/CsaV3_3G000200	4	CsaV3_3G017020/CsaV3_6G038660/CsaV3_4G010360/CsaV3_6G002720
csv00860	Porphyrin and chlorophyll metabolism	28/2230	44/4159	0.11702	0.73837	CsaV3_4G011730/CsaV3_3G031800/CsaV3_4G008050/CsaV3_4G031720/CsaV3_2G028140/CsaV3_6G050640/CsaV3_4G033870/CsaV3_5G003370/CsaV3_1G002370/CsaV3_2G025670/CsaV3_1G024260/CsaV3_3G014130/CsaV3_6G034450/CsaV3_2G030530/CsaV3_7G007260/CsaV3_1G000080/CsaV3_5G010770/CsaV3_3G011480/CsaV3_6G012280/CsaV3_2G013440/CsaV3_6G013410/CsaV3_2G016720/CsaV3_6G039120/CsaV3_7G007370/CsaV3_1G043160/CsaV3_1G030090/CsaV3_1G0…	CsaV3_4G011730/CsaV3_3G031800/CsaV3_4G008050/CsaV3_4G031720/CsaV3_2G028140/CsaV3_6G050640/CsaV3_4G033870/CsaV3_5G003370/CsaV3_1G002370/CsaV3_2G025670/CsaV3_1G024260/CsaV3_3G014130/CsaV3_6G034450/CsaV3_2G030530/CsaV3_7G007260/CsaV3_1G000080/CsaV3_5G010770/CsaV3_3G011480/CsaV3_6G012280/CsaV3_2G013440/CsaV3_6G013410/CsaV3_2G016720/CsaV3_6G039120/CsaV3_7G007370/CsaV3_1G043160/CsaV3_1G030090/CsaV3_1G0…	csv:101213619/csv:101219749/csv:101212208/csv:101219179/csv:101203770/csv:101217637/csv:101208554/csv:101206296/csv:101221755/csv:101216568/csv:101222986/csv:101218189/csv:101205768/csv:101220615/csv:101207399/csv:101206600/csv:101212245/csv:101208123/csv:101210597/csv:101203653/csv:101217584/csv:101223133/csv:101208461/csv:101208135/csv:101217650/csv:101214191/csv:101218513/csv:101213181	28	21	CsaV3_4G011730/CsaV3_3G031800/CsaV3_4G008050/CsaV3_4G031720/CsaV3_2G028140/CsaV3_6G050640/CsaV3_4G033870/CsaV3_1G002370/CsaV3_3G014130/CsaV3_6G034450/CsaV3_2G030530/CsaV3_7G007260/CsaV3_1G000080/CsaV3_5G010770/CsaV3_3G011480/CsaV3_6G012280/CsaV3_6G039120/CsaV3_1G043160/CsaV3_1G030090/CsaV3_1G038230/CsaV3_6G001080	7	CsaV3_5G003370/CsaV3_2G025670/CsaV3_1G024260/CsaV3_2G013440/CsaV3_6G013410/CsaV3_2G016720/CsaV3_7G007370
csv00904	Diterpenoid biosynthesis	15/2230	22/4159	0.122587	0.73837	CsaV3_3G049410/CsaV3_3G049420/CsaV3_6G006520/CsaV3_3G049400/CsaV3_3G026530/CsaV3_4G007790/CsaV3_3G016600/CsaV3_7G032870/CsaV3_3G049380/CsaV3_4G033930/CsaV3_1G011060/CsaV3_3G010170/CsaV3_5G005560/CsaV3_1G032430/CsaV3_3G001930	CsaV3_3G049410/CsaV3_3G049420/CsaV3_6G006520/CsaV3_3G049400/CsaV3_3G026530/CsaV3_4G007790/CsaV3_3G016600/CsaV3_7G032870/CsaV3_3G049380/CsaV3_4G033930/CsaV3_1G011060/CsaV3_3G010170/CsaV3_5G005560/CsaV3_1G032430/CsaV3_3G001930	csv:101207275/csv:105435043/csv:101220640/csv:101206798/csv:101205466/csv:101215820/csv:101212262/csv:101223012/csv:101206553/csv:101209283/csv:101220719/csv:101221667/csv:101212803/csv:101214915/csv:101208903	15	5	CsaV3_3G016600/CsaV3_7G032870/CsaV3_4G033930/CsaV3_3G010170/CsaV3_1G032430	10	CsaV3_3G049410/CsaV3_3G049420/CsaV3_6G006520/CsaV3_3G049400/CsaV3_3G026530/CsaV3_4G007790/CsaV3_3G049380/CsaV3_1G011060/CsaV3_5G005560/CsaV3_3G001930
csv03030	DNA replication	26/2230	41/4159	0.133937	0.73837	CsaV3_7G029940/CsaV3_6G051630/CsaV3_7G000210/CsaV3_5G039570/CsaV3_1G002970/CsaV3_3G046980/CsaV3_6G053180/CsaV3_3G032880/CsaV3_6G016510/CsaV3_1G006450/CsaV3_6G038660/CsaV3_3G038830/CsaV3_1G006150/CsaV3_4G010360/CsaV3_1G046580/CsaV3_2G016500/CsaV3_5G035370/CsaV3_3G005270/CsaV3_6G014300/CsaV3_2G031270/CsaV3_4G033030/CsaV3_2G003500/CsaV3_3G010270/CsaV3_4G031600/CsaV3_5G008820/CsaV3_3G003530	CsaV3_7G029940/CsaV3_6G051630/CsaV3_7G000210/CsaV3_5G039570/CsaV3_1G002970/CsaV3_3G046980/CsaV3_6G053180/CsaV3_3G032880/CsaV3_6G016510/CsaV3_1G006450/CsaV3_6G038660/CsaV3_3G038830/CsaV3_1G006150/CsaV3_4G010360/CsaV3_1G046580/CsaV3_2G016500/CsaV3_5G035370/CsaV3_3G005270/CsaV3_6G014300/CsaV3_2G031270/CsaV3_4G033030/CsaV3_2G003500/CsaV3_3G010270/CsaV3_4G031600/CsaV3_5G008820/CsaV3_3G003530	csv:101219064/csv:101210889/csv:101211850/csv:101203146/csv:101208545/csv:101220176/csv:101219775/csv:101219546/csv:101208473/csv:101210420/csv:101204361/csv:101221438/csv:101206268/csv:101216298/csv:101208243/csv:101211201/csv:101205315/csv:101212518/csv:101213447/csv:101208210/csv:101202933/csv:101211822/csv:101220726/csv:101221072/csv:101213310/csv:101208984	26	24	CsaV3_7G029940/CsaV3_6G051630/CsaV3_7G000210/CsaV3_5G039570/CsaV3_1G002970/CsaV3_3G046980/CsaV3_6G053180/CsaV3_3G032880/CsaV3_6G016510/CsaV3_1G006450/CsaV3_3G038830/CsaV3_1G006150/CsaV3_1G046580/CsaV3_2G016500/CsaV3_5G035370/CsaV3_3G005270/CsaV3_6G014300/CsaV3_2G031270/CsaV3_4G033030/CsaV3_2G003500/CsaV3_3G010270/CsaV3_4G031600/CsaV3_5G008820/CsaV3_3G003530	2	CsaV3_6G038660/CsaV3_4G010360
csv00790	Folate biosynthesis	16/2230	24/4159	0.139732	0.73837	CsaV3_5G030140/CsaV3_4G037860/CsaV3_4G033040/CsaV3_5G008630/CsaV3_5G037300/CsaV3_2G014940/CsaV3_3G021950/CsaV3_7G025390/CsaV3_7G031490/CsaV3_6G038720/CsaV3_7G026240/CsaV3_4G033410/CsaV3_6G051460/CsaV3_5G004930/CsaV3_6G003290/CsaV3_1G000030	CsaV3_5G030140/CsaV3_4G037860/CsaV3_4G033040/CsaV3_5G008630/CsaV3_5G037300/CsaV3_2G014940/CsaV3_3G021950/CsaV3_7G025390/CsaV3_7G031490/CsaV3_6G038720/CsaV3_7G026240/CsaV3_4G033410/CsaV3_6G051460/CsaV3_5G004930/CsaV3_6G003290/CsaV3_1G000030	csv:101215260/csv:101210375/csv:101206873/csv:101213228/csv:101209617/csv:101208660/csv:101208344/csv:101210756/csv:101220174/csv:101223106/csv:101210466/csv:101212163/csv:101207464/csv:101220833/csv:101212510/csv:101205654	16	2	CsaV3_5G008630/CsaV3_6G051460	14	CsaV3_5G030140/CsaV3_4G037860/CsaV3_4G033040/CsaV3_5G037300/CsaV3_2G014940/CsaV3_3G021950/CsaV3_7G025390/CsaV3_7G031490/CsaV3_6G038720/CsaV3_7G026240/CsaV3_4G033410/CsaV3_5G004930/CsaV3_6G003290/CsaV3_1G000030
csv00220	Arginine biosynthesis	23/2230	36/4159	0.141383	0.73837	CsaV3_5G023920/CsaV3_5G031200/CsaV3_7G030560/CsaV3_1G000670/CsaV3_3G031010/CsaV3_3G021030/CsaV3_6G006290/novel.389/CsaV3_7G033940/CsaV3_4G004380/CsaV3_4G013270/CsaV3_3G047470/CsaV3_4G013280/CsaV3_1G001680/CsaV3_3G035070/CsaV3_2G014210/CsaV3_1G009560/CsaV3_2G031570/CsaV3_2G024880/CsaV3_1G013270/CsaV3_5G005200/CsaV3_6G010020/CsaV3_5G005130	CsaV3_5G023920/CsaV3_5G031200/CsaV3_7G030560/CsaV3_1G000670/CsaV3_3G031010/CsaV3_3G021030/CsaV3_6G006290/-/CsaV3_7G033940/CsaV3_4G004380/CsaV3_4G013270/CsaV3_3G047470/CsaV3_4G013280/CsaV3_1G001680/CsaV3_3G035070/CsaV3_2G014210/CsaV3_1G009560/CsaV3_2G031570/CsaV3_2G024880/CsaV3_1G013270/CsaV3_5G005200/CsaV3_6G010020/CsaV3_5G005130	csv:101215515/csv:101213570/csv:101213413/csv:101215982/csv:101207254/csv:101221473/csv:101207674/csv:101220538/csv:101212146/csv:101202786/csv:101221948/csv:101213892/csv:101221948/csv:101213747/csv:101222699/csv:101213242/csv:101215247/csv:101203871/csv:101207914/csv:101217299/csv:101215455/csv:101213747/csv:101218466	23	8	CsaV3_6G006290/novel.389/CsaV3_4G004380/CsaV3_4G013280/CsaV3_3G035070/CsaV3_2G014210/CsaV3_1G009560/CsaV3_5G005200	15	CsaV3_5G023920/CsaV3_5G031200/CsaV3_7G030560/CsaV3_1G000670/CsaV3_3G031010/CsaV3_3G021030/CsaV3_7G033940/CsaV3_4G013270/CsaV3_3G047470/CsaV3_1G001680/CsaV3_2G031570/CsaV3_2G024880/CsaV3_1G013270/CsaV3_6G010020/CsaV3_5G005130
csv00910	Nitrogen metabolism	20/2230	31/4159	0.148946	0.73837	CsaV3_5G023920/CsaV3_3G018610/CsaV3_7G030560/CsaV3_5G031570/CsaV3_3G021030/CsaV3_5G023360/CsaV3_2G030320/CsaV3_4G004380/CsaV3_4G013270/CsaV3_5G023370/CsaV3_2G026780/CsaV3_4G013280/CsaV3_6G043980/CsaV3_2G026770/CsaV3_6G039990/CsaV3_3G042440/CsaV3_3G027930/CsaV3_3G011860/CsaV3_5G005130/CsaV3_5G031350	CsaV3_5G023920/CsaV3_3G018610/CsaV3_7G030560/CsaV3_5G031570/CsaV3_3G021030/CsaV3_5G023360/CsaV3_2G030320/CsaV3_4G004380/CsaV3_4G013270/CsaV3_5G023370/CsaV3_2G026780/CsaV3_4G013280/CsaV3_6G043980/CsaV3_2G026770/CsaV3_6G039990/CsaV3_3G042440/CsaV3_3G027930/CsaV3_3G011860/CsaV3_5G005130/CsaV3_5G031350	csv:101215515/csv:101217505/csv:101213413/csv:101215090/csv:101221473/csv:101219000/csv:101212995/csv:101202786/csv:101221948/csv:101219000/csv:101219000/csv:101221948/csv:101206142/csv:101219000/csv:101202774/csv:101213998/csv:101213224/csv:101205401/csv:101218466/csv:101212365	20	5	CsaV3_3G018610/CsaV3_4G004380/CsaV3_4G013280/CsaV3_3G042440/CsaV3_3G027930	15	CsaV3_5G023920/CsaV3_7G030560/CsaV3_5G031570/CsaV3_3G021030/CsaV3_5G023360/CsaV3_2G030320/CsaV3_4G013270/CsaV3_5G023370/CsaV3_2G026780/CsaV3_6G043980/CsaV3_2G026770/CsaV3_6G039990/CsaV3_3G011860/CsaV3_5G005130/CsaV3_5G031350
csv04146	Peroxisome	44/2230	73/4159	0.15098	0.73837	CsaV3_3G006080/CsaV3_4G013220/CsaV3_4G002560/CsaV3_4G000460/CsaV3_4G037250/CsaV3_3G011240/CsaV3_7G004280/CsaV3_6G038810/CsaV3_6G014400/CsaV3_2G011380/CsaV3_6G051820/CsaV3_6G048870/CsaV3_2G034560/CsaV3_2G005140/CsaV3_6G050930/CsaV3_7G028910/CsaV3_6G031490/CsaV3_1G046740/CsaV3_2G004490/CsaV3_3G002720/CsaV3_2G002230/CsaV3_2G002690/CsaV3_5G013260/CsaV3_3G013480/CsaV3_3G030870/CsaV3_4G010390/CsaV3_1G0…	CsaV3_3G006080/CsaV3_4G013220/CsaV3_4G002560/CsaV3_4G000460/CsaV3_4G037250/CsaV3_3G011240/CsaV3_7G004280/CsaV3_6G038810/CsaV3_6G014400/CsaV3_2G011380/CsaV3_6G051820/CsaV3_6G048870/CsaV3_2G034560/CsaV3_2G005140/CsaV3_6G050930/CsaV3_7G028910/CsaV3_6G031490/CsaV3_1G046740/CsaV3_2G004490/CsaV3_3G002720/CsaV3_2G002230/CsaV3_2G002690/CsaV3_5G013260/CsaV3_3G013480/CsaV3_3G030870/CsaV3_4G010390/CsaV3_1G0…	csv:101205134/csv:101222901/csv:101221260/csv:101210878/csv:101202931/csv:101217710/csv:101214701/csv:101203798/csv:101221780/csv:101212301/csv:101215498/csv:101221512/csv:101220632/csv:101211331/csv:101214296/csv:101213891/csv:101216662/csv:101216440/csv:101216556/csv:101220303/csv:101208626/csv:101203635/csv:101218922/csv:101207461/csv:101205684/csv:101218890/csv:101216945/csv:101222521/csv:101…	44	13	CsaV3_4G000460/CsaV3_6G014400/CsaV3_2G034560/CsaV3_5G013260/CsaV3_3G030870/CsaV3_2G026230/CsaV3_UNG144110/CsaV3_6G014940/CsaV3_3G030850/CsaV3_1G039270/CsaV3_4G028240/CsaV3_1G033470/CsaV3_1G004740	31	CsaV3_3G006080/CsaV3_4G013220/CsaV3_4G002560/CsaV3_4G037250/CsaV3_3G011240/CsaV3_7G004280/CsaV3_6G038810/CsaV3_2G011380/CsaV3_6G051820/CsaV3_6G048870/CsaV3_2G005140/CsaV3_6G050930/CsaV3_7G028910/CsaV3_6G031490/CsaV3_1G046740/CsaV3_2G004490/CsaV3_3G002720/CsaV3_2G002230/CsaV3_2G002690/CsaV3_3G013480/CsaV3_4G010390/CsaV3_1G004130/CsaV3_5G004440/CsaV3_6G005940/CsaV3_1G045840/CsaV3_4G002910/CsaV3_2G0…
csv04626	Plant-pathogen interaction	82/2230	141/4159	0.155446	0.73837	CsaV3_7G006290/CsaV3_5G038390/CsaV3_1G038690/CsaV3_2G013830/CsaV3_4G002860/CsaV3_1G038710/CsaV3_2G029200/CsaV3_2G028690/CsaV3_6G050560/CsaV3_3G028060/CsaV3_3G017490/CsaV3_6G039330/CsaV3_5G037010/CsaV3_7G030510/CsaV3_4G006200/CsaV3_3G033720/CsaV3_3G017600/CsaV3_3G010940/CsaV3_3G008110/CsaV3_4G027680/CsaV3_2G015130/CsaV3_3G021210/CsaV3_1G029500/CsaV3_7G026140/CsaV3_3G028070/CsaV3_7G008650/CsaV3_6G0…	CsaV3_7G006290/CsaV3_5G038390/CsaV3_1G038690/CsaV3_2G013830/CsaV3_4G002860/CsaV3_1G038710/CsaV3_2G029200/CsaV3_2G028690/CsaV3_6G050560/CsaV3_3G028060/CsaV3_3G017490/CsaV3_6G039330/CsaV3_5G037010/CsaV3_7G030510/CsaV3_4G006200/CsaV3_3G033720/CsaV3_3G017600/CsaV3_3G010940/CsaV3_3G008110/CsaV3_4G027680/CsaV3_2G015130/CsaV3_3G021210/CsaV3_1G029500/CsaV3_7G026140/CsaV3_3G028070/CsaV3_7G008650/CsaV3_6G0…	csv:101216389/csv:101203560/csv:101207890/csv:101218625/csv:101220633/csv:101221822/csv:101210316/csv:101217470/csv:101221901/csv:101214428/csv:101210914/csv:101212721/csv:101214558/csv:101223136/csv:101213932/csv:101211735/csv:101208950/csv:101213966/csv:101206492/csv:101205905/csv:101204401/csv:101218237/csv:101218643/csv:101221990/csv:101214670/csv:101219869/csv:101221382/csv:101210335/csv:101…	82	31	CsaV3_5G038390/CsaV3_1G038690/CsaV3_1G038710/CsaV3_6G039330/CsaV3_4G006200/CsaV3_3G033720/CsaV3_3G017600/CsaV3_3G008110/CsaV3_4G027680/CsaV3_1G029500/CsaV3_6G003730/CsaV3_5G018740/CsaV3_5G028160/CsaV3_5G034300/CsaV3_1G044520/CsaV3_6G013210/CsaV3_6G009480/CsaV3_1G001870/CsaV3_3G043140/CsaV3_5G027600/CsaV3_4G027870/CsaV3_5G036030/CsaV3_7G028550/CsaV3_1G001110/CsaV3_1G042850/CsaV3_3G005930/CsaV3_3G0…	51	CsaV3_7G006290/CsaV3_2G013830/CsaV3_4G002860/CsaV3_2G029200/CsaV3_2G028690/CsaV3_6G050560/CsaV3_3G028060/CsaV3_3G017490/CsaV3_5G037010/CsaV3_7G030510/CsaV3_3G010940/CsaV3_2G015130/CsaV3_3G021210/CsaV3_7G026140/CsaV3_3G028070/CsaV3_7G008650/CsaV3_7G032210/CsaV3_3G005100/CsaV3_3G001430/CsaV3_1G014860/CsaV3_7G023780/CsaV3_6G007940/CsaV3_1G033910/CsaV3_3G032970/CsaV3_3G028090/CsaV3_2G007530/CsaV3_1G0…
csv00240	Pyrimidine metabolism	29/2230	47/4159	0.165983	0.756883	CsaV3_6G053210/CsaV3_6G009390/CsaV3_6G038890/CsaV3_1G009350/CsaV3_1G002650/CsaV3_4G006620/CsaV3_7G026770/CsaV3_6G040600/CsaV3_5G024820/CsaV3_2G014940/novel.495/CsaV3_2G010660/CsaV3_6G042080/CsaV3_1G007330/CsaV3_7G029810/CsaV3_7G021480/CsaV3_7G006870/CsaV3_2G028630/CsaV3_6G041780/CsaV3_3G027630/CsaV3_3G020520/CsaV3_3G007170/CsaV3_1G009660/CsaV3_4G003130/CsaV3_3G010330/CsaV3_3G004920/CsaV3_5G020740…	CsaV3_6G053210/CsaV3_6G009390/CsaV3_6G038890/CsaV3_1G009350/CsaV3_1G002650/CsaV3_4G006620/CsaV3_7G026770/CsaV3_6G040600/CsaV3_5G024820/CsaV3_2G014940/-/CsaV3_2G010660/CsaV3_6G042080/CsaV3_1G007330/CsaV3_7G029810/CsaV3_7G021480/CsaV3_7G006870/CsaV3_2G028630/CsaV3_6G041780/CsaV3_3G027630/CsaV3_3G020520/CsaV3_3G007170/CsaV3_1G009660/CsaV3_4G003130/CsaV3_3G010330/CsaV3_3G004920/CsaV3_5G020740/CsaV3_4…	csv:101219296/csv:101217271/csv:101204944/csv:101212831/csv:101204836/csv:101210301/csv:105436154/csv:101211263/csv:101220596/csv:101208660/csv:101203215/csv:101203551/csv:101210105/csv:101202899/csv:101203215/csv:101219714/csv:101223016/csv:101218654/csv:101221565/csv:101222416/csv:101207261/csv:101217169/csv:101203823/csv:101213795/csv:101204669/csv:101220705/csv:101214106/csv:101212270/csv:101…	29	15	CsaV3_6G009390/CsaV3_1G009350/CsaV3_1G002650/CsaV3_6G040600/CsaV3_6G042080/CsaV3_7G029810/CsaV3_2G028630/CsaV3_6G041780/CsaV3_3G027630/CsaV3_3G007170/CsaV3_1G009660/CsaV3_4G003130/CsaV3_3G004920/CsaV3_4G001780/CsaV3_7G023220	14	CsaV3_6G053210/CsaV3_6G038890/CsaV3_4G006620/CsaV3_7G026770/CsaV3_5G024820/CsaV3_2G014940/novel.495/CsaV3_2G010660/CsaV3_1G007330/CsaV3_7G021480/CsaV3_7G006870/CsaV3_3G020520/CsaV3_3G010330/CsaV3_5G020740
csv00310	Lysine degradation	17/2230	27/4159	0.217599	0.937014	CsaV3_1G041440/CsaV3_5G023260/CsaV3_6G000070/CsaV3_1G001600/CsaV3_7G005590/CsaV3_3G015370/CsaV3_6G028580/CsaV3_3G027790/CsaV3_3G011580/CsaV3_7G003880/CsaV3_2G004110/CsaV3_3G038540/CsaV3_7G005580/CsaV3_2G016440/CsaV3_6G000060/CsaV3_7G034360/CsaV3_6G002600	CsaV3_1G041440/CsaV3_5G023260/CsaV3_6G000070/CsaV3_1G001600/CsaV3_7G005590/CsaV3_3G015370/CsaV3_6G028580/CsaV3_3G027790/CsaV3_3G011580/CsaV3_7G003880/CsaV3_2G004110/CsaV3_3G038540/CsaV3_7G005580/CsaV3_2G016440/CsaV3_6G000060/CsaV3_7G034360/CsaV3_6G002600	csv:101214976/csv:101220194/csv:101207718/csv:101209430/csv:101217644/csv:101222823/csv:101221248/csv:101204477/csv:101222210/csv:101221310/csv:101202756/csv:101217644/csv:101217644/csv:101210052/csv:101207718/csv:101205436/csv:101212299	17	9	CsaV3_5G023260/CsaV3_6G000070/CsaV3_7G005590/CsaV3_3G015370/CsaV3_7G003880/CsaV3_3G038540/CsaV3_7G005580/CsaV3_2G016440/CsaV3_6G000060	8	CsaV3_1G041440/CsaV3_1G001600/CsaV3_6G028580/CsaV3_3G027790/CsaV3_3G011580/CsaV3_2G004110/CsaV3_7G034360/CsaV3_6G002600
csv00071	Fatty acid degradation	30/2230	50/4159	0.221924	0.937014	CsaV3_7G024990/CsaV3_6G031750/CsaV3_1G001600/CsaV3_5G026420/CsaV3_7G024950/CsaV3_3G011240/CsaV3_2G011380/CsaV3_6G028580/CsaV3_3G014880/CsaV3_2G034560/CsaV3_2G002170/CsaV3_6G023960/CsaV3_2G004110/CsaV3_3G013480/CsaV3_1G036060/CsaV3_5G004440/CsaV3_UNG144110/CsaV3_6G025240/CsaV3_6G023910/CsaV3_6G007280/CsaV3_7G024980/novel.818/CsaV3_1G007740/CsaV3_6G025310/CsaV3_4G028240/CsaV3_6G022310/CsaV3_6G02411…	CsaV3_7G024990/CsaV3_6G031750/CsaV3_1G001600/CsaV3_5G026420/CsaV3_7G024950/CsaV3_3G011240/CsaV3_2G011380/CsaV3_6G028580/CsaV3_3G014880/CsaV3_2G034560/CsaV3_2G002170/CsaV3_6G023960/CsaV3_2G004110/CsaV3_3G013480/CsaV3_1G036060/CsaV3_5G004440/CsaV3_UNG144110/CsaV3_6G025240/CsaV3_6G023910/CsaV3_6G007280/CsaV3_7G024980/-/CsaV3_1G007740/CsaV3_6G025310/CsaV3_4G028240/CsaV3_6G022310/CsaV3_6G024110/CsaV3_…	csv:101206036/csv:101212881/csv:101209430/csv:101209864/csv:101209854/csv:101217710/csv:101212301/csv:101221248/csv:101207559/csv:101220632/csv:101209359/csv:101218899/csv:101202756/csv:101207461/csv:101214516/csv:101222521/csv:101218159/csv:101218899/csv:101218899/csv:101208145/csv:101209854/csv:101218899/csv:101212994/csv:101218899/csv:101218462/csv:101210295/csv:101218899/csv:101205436/csv:101…	30	12	CsaV3_2G034560/CsaV3_6G023960/CsaV3_UNG144110/CsaV3_6G025240/CsaV3_6G007280/CsaV3_7G024980/CsaV3_1G007740/CsaV3_6G025310/CsaV3_4G028240/CsaV3_6G024110/CsaV3_5G001590/CsaV3_7G024960	18	CsaV3_7G024990/CsaV3_6G031750/CsaV3_1G001600/CsaV3_5G026420/CsaV3_7G024950/CsaV3_3G011240/CsaV3_2G011380/CsaV3_6G028580/CsaV3_3G014880/CsaV3_2G002170/CsaV3_2G004110/CsaV3_3G013480/CsaV3_1G036060/CsaV3_5G004440/CsaV3_6G023910/novel.818/CsaV3_6G022310/CsaV3_7G034360
csv00520	Amino sugar and nucleotide sugar metabolism	66/2230	115/4159	0.233722	0.951583	CsaV3_6G001370/CsaV3_2G010560/CsaV3_5G008090/CsaV3_1G028640/CsaV3_4G001030/CsaV3_6G047720/CsaV3_4G010130/CsaV3_3G021590/CsaV3_7G002310/CsaV3_2G001890/CsaV3_4G029030/CsaV3_2G031320/CsaV3_2G007810/CsaV3_4G006660/CsaV3_5G003160/CsaV3_4G017410/CsaV3_2G014910/CsaV3_6G039140/CsaV3_2G001860/CsaV3_3G039800/CsaV3_6G006740/CsaV3_5G001840/CsaV3_3G045830/CsaV3_3G045370/CsaV3_7G026310/CsaV3_6G048050/CsaV3_3G0…	CsaV3_6G001370/CsaV3_2G010560/CsaV3_5G008090/CsaV3_1G028640/CsaV3_4G001030/CsaV3_6G047720/CsaV3_4G010130/CsaV3_3G021590/CsaV3_7G002310/CsaV3_2G001890/CsaV3_4G029030/CsaV3_2G031320/CsaV3_2G007810/CsaV3_4G006660/CsaV3_5G003160/CsaV3_4G017410/CsaV3_2G014910/CsaV3_6G039140/CsaV3_2G001860/CsaV3_3G039800/CsaV3_6G006740/CsaV3_5G001840/CsaV3_3G045830/CsaV3_3G045370/CsaV3_7G026310/CsaV3_6G048050/CsaV3_3G0…	csv:101211496/csv:101222628/csv:101219906/csv:101214415/csv:101223149/csv:101215333/csv:101207713/csv:101213621/csv:101216573/csv:101218300/csv:101212569/csv:101214230/csv:101214888/csv:101209558/csv:101203400/csv:101219272/csv:101208904/csv:101208701/csv:101218300/csv:101214861/csv:101213366/csv:101205820/csv:101216058/csv:101221562/csv:101209561/csv:101214692/csv:101222731/csv:101220205/csv:101…	66	24	CsaV3_2G010560/CsaV3_4G001030/CsaV3_4G010130/CsaV3_3G021590/CsaV3_7G002310/CsaV3_2G001890/CsaV3_2G014910/CsaV3_6G039140/CsaV3_5G001840/CsaV3_3G045830/CsaV3_3G045370/CsaV3_3G021110/CsaV3_1G037730/CsaV3_2G009420/CsaV3_2G002740/CsaV3_2G024360/CsaV3_3G009370/CsaV3_4G035660/CsaV3_1G003390/CsaV3_2G013100/CsaV3_2G001900/CsaV3_2G030420/CsaV3_3G008510/CsaV3_6G032490	42	CsaV3_6G001370/CsaV3_5G008090/CsaV3_1G028640/CsaV3_6G047720/CsaV3_4G029030/CsaV3_2G031320/CsaV3_2G007810/CsaV3_4G006660/CsaV3_5G003160/CsaV3_4G017410/CsaV3_2G001860/CsaV3_3G039800/CsaV3_6G006740/CsaV3_7G026310/CsaV3_6G048050/CsaV3_3G000410/CsaV3_5G027030/CsaV3_6G006000/CsaV3_4G008770/CsaV3_5G005580/CsaV3_1G036780/CsaV3_7G027500/CsaV3_3G020950/CsaV3_6G052860/CsaV3_1G038770/CsaV3_7G006230/CsaV3_1G0…
csv00270	Cysteine and methionine metabolism	57/2230	100/4159	0.279947	0.999874	CsaV3_2G013530/CsaV3_1G042250/CsaV3_3G020560/CsaV3_6G037780/CsaV3_3G020550/CsaV3_3G001160/CsaV3_5G031670/CsaV3_7G029770/CsaV3_3G012920/CsaV3_2G001540/CsaV3_5G013990/CsaV3_2G004390/CsaV3_1G039700/CsaV3_5G000580/CsaV3_2G007750/CsaV3_6G000650/CsaV3_1G041170/CsaV3_3G033240/CsaV3_4G033420/CsaV3_3G047470/CsaV3_3G031190/CsaV3_7G028870/CsaV3_4G026970/CsaV3_5G002830/CsaV3_2G007760/CsaV3_4G006090/CsaV3_3G0…	CsaV3_2G013530/CsaV3_1G042250/CsaV3_3G020560/CsaV3_6G037780/CsaV3_3G020550/CsaV3_3G001160/CsaV3_5G031670/CsaV3_7G029770/CsaV3_3G012920/CsaV3_2G001540/CsaV3_5G013990/CsaV3_2G004390/CsaV3_1G039700/CsaV3_5G000580/CsaV3_2G007750/CsaV3_6G000650/CsaV3_1G041170/CsaV3_3G033240/CsaV3_4G033420/CsaV3_3G047470/CsaV3_3G031190/CsaV3_7G028870/CsaV3_4G026970/CsaV3_5G002830/CsaV3_2G007760/CsaV3_4G006090/CsaV3_3G0…	csv:101222725/csv:101218956/csv:101207514/csv:101209525/csv:101207514/csv:101207925/csv:101213410/csv:101203453/csv:101222292/csv:101203726/csv:101206078/csv:101218606/csv:101219222/csv:101222254/csv:101215844/csv:101220896/csv:101210526/csv:101203709/csv:101212407/csv:101213892/csv:101219910/csv:101214377/csv:101210304/csv:101218859/csv:101207514/csv:101212728/csv:101212743/csv:101217437/csv:101…	57	25	CsaV3_1G042250/CsaV3_3G020560/CsaV3_3G020550/CsaV3_3G001160/CsaV3_7G029770/CsaV3_5G013990/CsaV3_5G000580/CsaV3_3G031190/CsaV3_7G028870/CsaV3_4G026970/CsaV3_6G044420/CsaV3_5G039900/CsaV3_UNG227840/CsaV3_3G039680/CsaV3_UNG227820/CsaV3_1G041720/CsaV3_6G015400/CsaV3_2G007310/CsaV3_4G004900/CsaV3_3G043020/CsaV3_4G009080/CsaV3_7G000760/CsaV3_1G039210/CsaV3_3G007460/CsaV3_5G024880	32	CsaV3_2G013530/CsaV3_6G037780/CsaV3_5G031670/CsaV3_3G012920/CsaV3_2G001540/CsaV3_2G004390/CsaV3_1G039700/CsaV3_2G007750/CsaV3_6G000650/CsaV3_1G041170/CsaV3_3G033240/CsaV3_4G033420/CsaV3_3G047470/CsaV3_5G002830/CsaV3_2G007760/CsaV3_4G006090/CsaV3_3G028000/CsaV3_4G028410/CsaV3_1G008370/CsaV3_3G013880/CsaV3_1G002350/CsaV3_7G032920/CsaV3_3G000880/CsaV3_3G010720/CsaV3_2G025820/CsaV3_5G030130/CsaV3_4G0…
csv00260	Glycine, serine and threonine metabolism	41/2230	71/4159	0.280567	0.999874	CsaV3_5G003790/CsaV3_6G038150/CsaV3_5G031200/CsaV3_5G003800/CsaV3_6G040210/CsaV3_6G000070/CsaV3_2G017260/CsaV3_1G010620/CsaV3_3G043270/CsaV3_2G003740/CsaV3_6G045610/CsaV3_1G002920/CsaV3_3G015370/CsaV3_3G033240/CsaV3_7G022600/CsaV3_3G031190/CsaV3_4G026970/CsaV3_5G003310/CsaV3_6G040230/CsaV3_5G039900/CsaV3_UNG227840/CsaV3_1G001830/CsaV3_3G009440/CsaV3_4G028640/CsaV3_1G044710/CsaV3_UNG227820/CsaV3_2…	CsaV3_5G003790/CsaV3_6G038150/CsaV3_5G031200/CsaV3_5G003800/CsaV3_6G040210/CsaV3_6G000070/CsaV3_2G017260/CsaV3_1G010620/CsaV3_3G043270/CsaV3_2G003740/CsaV3_6G045610/CsaV3_1G002920/CsaV3_3G015370/CsaV3_3G033240/CsaV3_7G022600/CsaV3_3G031190/CsaV3_4G026970/CsaV3_5G003310/CsaV3_6G040230/CsaV3_5G039900/CsaV3_UNG227840/CsaV3_1G001830/CsaV3_3G009440/CsaV3_4G028640/CsaV3_1G044710/CsaV3_UNG227820/CsaV3_2…	csv:101213059/csv:101222468/csv:101213570/csv:101212818/csv:101205445/csv:101207718/csv:101209304/csv:101209820/csv:101222321/csv:101207481/csv:101211596/csv:101208305/csv:101222823/csv:101203709/csv:101210998/csv:101219910/csv:101210304/csv:101219817/csv:101205680/csv:101202843/csv:101219910/csv:101213657/csv:101209989/csv:101215287/csv:101220286/csv:101219910/csv:101217746/csv:101211272/csv:101…	41	23	CsaV3_6G038150/CsaV3_6G040210/CsaV3_6G000070/CsaV3_2G017260/CsaV3_1G010620/CsaV3_3G043270/CsaV3_6G045610/CsaV3_1G002920/CsaV3_3G015370/CsaV3_3G031190/CsaV3_4G026970/CsaV3_6G040230/CsaV3_5G039900/CsaV3_UNG227840/CsaV3_1G044710/CsaV3_UNG227820/CsaV3_2G013730/CsaV3_4G004900/CsaV3_6G040240/CsaV3_4G013550/CsaV3_7G032960/CsaV3_6G000060/CsaV3_5G024880	18	CsaV3_5G003790/CsaV3_5G031200/CsaV3_5G003800/CsaV3_2G003740/CsaV3_3G033240/CsaV3_7G022600/CsaV3_5G003310/CsaV3_1G001830/CsaV3_3G009440/CsaV3_4G028640/CsaV3_2G025570/CsaV3_3G019180/CsaV3_UNG000020/CsaV3_1G043980/CsaV3_2G024880/CsaV3_6G039090/CsaV3_7G034360/CsaV3_2G011710
csv00905	Brassinosteroid biosynthesis	120775	14/4159	0.299494	0.999874	CsaV3_5G033450/CsaV3_1G029710/CsaV3_4G005090/CsaV3_5G026940/CsaV3_3G030690/CsaV3_5G033440/CsaV3_5G038650/CsaV3_3G034190/CsaV3_2G002660	CsaV3_5G033450/CsaV3_1G029710/CsaV3_4G005090/CsaV3_5G026940/CsaV3_3G030690/CsaV3_5G033440/CsaV3_5G038650/CsaV3_3G034190/CsaV3_2G002660	csv:101219383/csv:101213466/csv:101211854/csv:101215045/csv:101203328/csv:101219383/csv:101206858/csv:101217020/csv:101208789	9	3	CsaV3_4G005090/CsaV3_5G026940/CsaV3_2G002660	6	CsaV3_5G033450/CsaV3_1G029710/CsaV3_3G030690/CsaV3_5G033440/CsaV3_5G038650/CsaV3_3G034190
csv00630	Glyoxylate and dicarboxylate metabolism	38/2230	66/4159	0.300554	0.999874	CsaV3_5G023920/CsaV3_5G031200/CsaV3_7G030560/CsaV3_6G000070/CsaV3_1G010620/CsaV3_5G002930/CsaV3_4G037250/CsaV3_3G021030/CsaV3_3G042420/CsaV3_6G047510/CsaV3_3G015070/CsaV3_7G031480/CsaV3_1G009520/CsaV3_3G015370/CsaV3_6G051820/CsaV3_6G031490/CsaV3_7G028870/CsaV3_6G043980/CsaV3_3G030870/CsaV3_1G044450/CsaV3_6G048160/CsaV3_6G015630/CsaV3_1G002350/CsaV3_5G004640/CsaV3_3G009440/CsaV3_4G028640/CsaV3_2G0…	CsaV3_5G023920/CsaV3_5G031200/CsaV3_7G030560/CsaV3_6G000070/CsaV3_1G010620/CsaV3_5G002930/CsaV3_4G037250/CsaV3_3G021030/CsaV3_3G042420/CsaV3_6G047510/CsaV3_3G015070/CsaV3_7G031480/CsaV3_1G009520/CsaV3_3G015370/CsaV3_6G051820/CsaV3_6G031490/CsaV3_7G028870/CsaV3_6G043980/CsaV3_3G030870/CsaV3_1G044450/CsaV3_6G048160/CsaV3_6G015630/CsaV3_1G002350/CsaV3_5G004640/CsaV3_3G009440/CsaV3_4G028640/CsaV3_2G0…	csv:101215515/csv:101213570/csv:101213413/csv:101207718/csv:101209820/csv:101220920/csv:101202931/csv:101221473/csv:101213516/csv:101217715/csv:101209903/csv:101220412/csv:101214523/csv:101222823/csv:101215498/csv:101216662/csv:101214377/csv:101206142/csv:101205684/csv:101209186/csv:101210494/csv:101209376/csv:101213903/csv:101220634/csv:101209989/csv:101215287/csv:101217746/csv:101203579/csv:101…	38	13	CsaV3_6G000070/CsaV3_1G010620/CsaV3_3G015370/CsaV3_7G028870/CsaV3_3G030870/CsaV3_1G044450/CsaV3_6G048160/CsaV3_5G004640/CsaV3_3G043770/CsaV3_3G030850/CsaV3_3G007460/CsaV3_7G032960/CsaV3_6G000060	25	CsaV3_5G023920/CsaV3_5G031200/CsaV3_7G030560/CsaV3_5G002930/CsaV3_4G037250/CsaV3_3G021030/CsaV3_3G042420/CsaV3_6G047510/CsaV3_3G015070/CsaV3_7G031480/CsaV3_1G009520/CsaV3_6G051820/CsaV3_6G031490/CsaV3_6G043980/CsaV3_6G015630/CsaV3_1G002350/CsaV3_3G009440/CsaV3_4G028640/CsaV3_2G025570/CsaV3_3G020130/CsaV3_3G019180/CsaV3_2G035120/CsaV3_2G024880/CsaV3_6G039090/CsaV3_2G011710
csv00906	Carotenoid biosynthesis	18/2230	30/4159	0.303161	0.999874	CsaV3_4G007180/CsaV3_4G007140/CsaV3_4G023380/CsaV3_4G022080/CsaV3_4G007560/CsaV3_4G017450/CsaV3_4G003370/CsaV3_5G002520/CsaV3_2G001370/CsaV3_5G020340/CsaV3_5G024720/CsaV3_4G034320/CsaV3_3G007050/CsaV3_2G030870/CsaV3_2G013780/CsaV3_6G040180/CsaV3_2G016630/CsaV3_1G032340	CsaV3_4G007180/CsaV3_4G007140/CsaV3_4G023380/CsaV3_4G022080/CsaV3_4G007560/CsaV3_4G017450/CsaV3_4G003370/CsaV3_5G002520/CsaV3_2G001370/CsaV3_5G020340/CsaV3_5G024720/CsaV3_4G034320/CsaV3_3G007050/CsaV3_2G030870/CsaV3_2G013780/CsaV3_6G040180/CsaV3_2G016630/CsaV3_1G032340	csv:101220226/csv:101212508/csv:101216484/csv:101207778/csv:101214823/csv:101219033/csv:101211624/csv:101214325/csv:101213753/csv:101206471/csv:101219413/csv:101213916/csv:101215492/csv:101216826/csv:101219340/csv:101204961/csv:101212903/csv:101204647	18	7	CsaV3_4G023380/CsaV3_4G007560/CsaV3_2G001370/CsaV3_5G024720/CsaV3_3G007050/CsaV3_2G016630/CsaV3_1G032340	11	CsaV3_4G007180/CsaV3_4G007140/CsaV3_4G022080/CsaV3_4G017450/CsaV3_4G003370/CsaV3_5G002520/CsaV3_5G020340/CsaV3_4G034320/CsaV3_2G030870/CsaV3_2G013780/CsaV3_6G040180
csv00330	Arginine and proline metabolism	33/2230	57/4159	0.303189	0.999874	CsaV3_7G030830/CsaV3_3G020560/CsaV3_3G020550/CsaV3_1G001600/CsaV3_5G031670/CsaV3_7G000850/CsaV3_5G000580/CsaV3_6G006290/CsaV3_2G007750/CsaV3_1G039030/CsaV3_3G014000/CsaV3_2G015310/CsaV3_3G047470/CsaV3_2G004110/CsaV3_2G007760/CsaV3_5G037760/CsaV3_3G028000/CsaV3_1G008370/CsaV3_4G032140/CsaV3_4G027860/CsaV3_3G013880/CsaV3_2G015790/CsaV3_1G003170/CsaV3_6G047520/CsaV3_7G000860/CsaV3_5G038920/CsaV3_6G0…	CsaV3_7G030830/CsaV3_3G020560/CsaV3_3G020550/CsaV3_1G001600/CsaV3_5G031670/CsaV3_7G000850/CsaV3_5G000580/CsaV3_6G006290/CsaV3_2G007750/CsaV3_1G039030/CsaV3_3G014000/CsaV3_2G015310/CsaV3_3G047470/CsaV3_2G004110/CsaV3_2G007760/CsaV3_5G037760/CsaV3_3G028000/CsaV3_1G008370/CsaV3_4G032140/CsaV3_4G027860/CsaV3_3G013880/CsaV3_2G015790/CsaV3_1G003170/CsaV3_6G047520/CsaV3_7G000860/CsaV3_5G038920/CsaV3_6G0…	csv:101209263/csv:101207514/csv:101207514/csv:101209430/csv:101213410/csv:101205749/csv:101222254/csv:101207674/csv:101215844/csv:101209418/csv:101215570/csv:101204085/csv:101213892/csv:101202756/csv:101207514/csv:101210382/csv:101212743/csv:101221659/csv:101205765/csv:101203976/csv:101213486/csv:101205119/csv:101210752/csv:101217481/csv:101204792/csv:101219166/csv:101209446/csv:101212960/csv:101…	33	11	CsaV3_3G020560/CsaV3_3G020550/CsaV3_7G000850/CsaV3_5G000580/CsaV3_6G006290/CsaV3_1G039030/CsaV3_4G027860/CsaV3_1G003170/CsaV3_5G005200/CsaV3_6G005580/CsaV3_2G003820	22	CsaV3_7G030830/CsaV3_1G001600/CsaV3_5G031670/CsaV3_2G007750/CsaV3_3G014000/CsaV3_2G015310/CsaV3_3G047470/CsaV3_2G004110/CsaV3_2G007760/CsaV3_5G037760/CsaV3_3G028000/CsaV3_1G008370/CsaV3_4G032140/CsaV3_3G013880/CsaV3_2G015790/CsaV3_6G047520/CsaV3_7G000860/CsaV3_5G038920/CsaV3_6G043860/CsaV3_2G024480/CsaV3_1G013270/CsaV3_7G034360
csv00770	Pantothenate and CoA biosynthesis	14/2230	23/4159	0.314107	0.999874	CsaV3_6G038890/CsaV3_6G035700/CsaV3_1G009240/CsaV3_1G007330/CsaV3_5G014210/CsaV3_7G006870/CsaV3_7G005980/CsaV3_6G044420/CsaV3_3G014460/CsaV3_7G025860/CsaV3_2G025820/CsaV3_5G031530/CsaV3_6G003860/CsaV3_3G011200	CsaV3_6G038890/CsaV3_6G035700/CsaV3_1G009240/CsaV3_1G007330/CsaV3_5G014210/CsaV3_7G006870/CsaV3_7G005980/CsaV3_6G044420/CsaV3_3G014460/CsaV3_7G025860/CsaV3_2G025820/CsaV3_5G031530/CsaV3_6G003860/CsaV3_3G011200	csv:101204944/csv:101214416/csv:101211378/csv:101202899/csv:101212902/csv:101223016/csv:101213336/csv:101217437/csv:101222371/csv:101207725/csv:101214004/csv:101216215/csv:101203236/csv:101217323	14	6	CsaV3_1G009240/CsaV3_5G014210/CsaV3_7G005980/CsaV3_6G044420/CsaV3_3G014460/CsaV3_3G011200	8	CsaV3_6G038890/CsaV3_6G035700/CsaV3_1G007330/CsaV3_7G006870/CsaV3_7G025860/CsaV3_2G025820/CsaV3_5G031530/CsaV3_6G003860
csv00130	Ubiquinone and other terpenoid-quinone biosynthesis	25/2230	43/4159	0.329896	0.999874	CsaV3_1G009470/CsaV3_3G030410/CsaV3_2G014380/CsaV3_7G031620/CsaV3_6G046030/CsaV3_6G052370/CsaV3_2G008500/CsaV3_4G033420/CsaV3_3G005530/CsaV3_1G031500/CsaV3_6G015650/CsaV3_1G002150/CsaV3_1G013520/CsaV3_1G026620/CsaV3_5G031500/CsaV3_4G006210/CsaV3_2G036090/CsaV3_7G033390/CsaV3_5G030200/CsaV3_4G030790/CsaV3_3G038470/CsaV3_3G015670/CsaV3_2G036010/CsaV3_2G009070/CsaV3_5G033620	CsaV3_1G009470/CsaV3_3G030410/CsaV3_2G014380/CsaV3_7G031620/CsaV3_6G046030/CsaV3_6G052370/CsaV3_2G008500/CsaV3_4G033420/CsaV3_3G005530/CsaV3_1G031500/CsaV3_6G015650/CsaV3_1G002150/CsaV3_1G013520/CsaV3_1G026620/CsaV3_5G031500/CsaV3_4G006210/CsaV3_2G036090/CsaV3_7G033390/CsaV3_5G030200/CsaV3_4G030790/CsaV3_3G038470/CsaV3_3G015670/CsaV3_2G036010/CsaV3_2G009070/CsaV3_5G033620	csv:101211791/csv:101219578/csv:101211762/csv:101218121/csv:101216659/csv:101212842/csv:101221791/csv:101212407/csv:101209481/csv:101218077/csv:101220123/csv:101218602/csv:101220141/csv:101208511/csv:101216706/csv:101214174/csv:101221344/csv:101220201/csv:101220731/csv:101223053/csv:101215980/csv:101207188/csv:101205148/csv:101205537/csv:101217012	25	13	CsaV3_7G031620/CsaV3_6G052370/CsaV3_2G008500/CsaV3_1G002150/CsaV3_1G026620/CsaV3_5G031500/CsaV3_4G006210/CsaV3_2G036090/CsaV3_5G030200/CsaV3_4G030790/CsaV3_3G038470/CsaV3_2G036010/CsaV3_5G033620	12	CsaV3_1G009470/CsaV3_3G030410/CsaV3_2G014380/CsaV3_6G046030/CsaV3_4G033420/CsaV3_3G005530/CsaV3_1G031500/CsaV3_6G015650/CsaV3_1G013520/CsaV3_7G033390/CsaV3_3G015670/CsaV3_2G009070
csv01200	Carbon metabolism	135/2230	245/4159	0.339935	0.999874	CsaV3_2G030720/CsaV3_3G048280/CsaV3_5G029170/CsaV3_5G031200/CsaV3_6G031750/CsaV3_6G040210/CsaV3_6G048080/CsaV3_5G028490/CsaV3_4G027510/CsaV3_6G000070/CsaV3_4G008750/CsaV3_2G017260/CsaV3_1G010620/CsaV3_2G001890/CsaV3_5G026370/CsaV3_3G031010/CsaV3_6G004010/CsaV3_3G009790/CsaV3_4G037250/CsaV3_3G036910/CsaV3_2G015280/CsaV3_2G004390/CsaV3_6G040340/CsaV3_1G039700/CsaV3_6G045610/CsaV3_1G016950/CsaV3_2G0…	CsaV3_2G030720/CsaV3_3G048280/CsaV3_5G029170/CsaV3_5G031200/CsaV3_6G031750/CsaV3_6G040210/CsaV3_6G048080/CsaV3_5G028490/CsaV3_4G027510/CsaV3_6G000070/CsaV3_4G008750/CsaV3_2G017260/CsaV3_1G010620/CsaV3_2G001890/CsaV3_5G026370/CsaV3_3G031010/CsaV3_6G004010/CsaV3_3G009790/CsaV3_4G037250/CsaV3_3G036910/CsaV3_2G015280/CsaV3_2G004390/CsaV3_6G040340/CsaV3_1G039700/CsaV3_6G045610/CsaV3_1G016950/CsaV3_2G0…	csv:101218724/csv:101222382/csv:101212411/csv:101213570/csv:101212881/csv:101205445/csv:101211230/csv:101212988/csv:101207741/csv:101207718/csv:101222930/csv:101209304/csv:101209820/csv:101218300/csv:101208883/csv:101207254/csv:101205576/csv:101215805/csv:101202931/csv:101209429/csv:101204323/csv:101218606/csv:101207102/csv:101219222/csv:101211596/csv:101222828/csv:101207970/csv:101208330/csv:101…	135	62	CsaV3_6G040210/CsaV3_4G027510/CsaV3_6G000070/CsaV3_4G008750/CsaV3_2G017260/CsaV3_1G010620/CsaV3_2G001890/CsaV3_3G009790/CsaV3_6G045610/CsaV3_1G016950/CsaV3_2G003700/CsaV3_3G001220/CsaV3_1G002920/CsaV3_6G039140/CsaV3_3G015370/CsaV3_5G003980/novel.1174/CsaV3_3G045830/CsaV3_1G032330/CsaV3_2G034560/CsaV3_4G004380/CsaV3_2G013320/CsaV3_4G029830/CsaV3_3G021780/CsaV3_3G031190/CsaV3_6G013500/CsaV3_7G02887…	73	CsaV3_2G030720/CsaV3_3G048280/CsaV3_5G029170/CsaV3_5G031200/CsaV3_6G031750/CsaV3_6G048080/CsaV3_5G028490/CsaV3_5G026370/CsaV3_3G031010/CsaV3_6G004010/CsaV3_4G037250/CsaV3_3G036910/CsaV3_2G015280/CsaV3_2G004390/CsaV3_6G040340/CsaV3_1G039700/CsaV3_3G042420/CsaV3_6G047510/CsaV3_6G044640/CsaV3_3G015070/CsaV3_2G001860/CsaV3_7G031480/CsaV3_2G032870/CsaV3_1G009520/CsaV3_6G051820/CsaV3_5G008880/CsaV3_6G0…
csv00030	Pentose phosphate pathway	27/2230	47/4159	0.352493	0.999874	CsaV3_6G048080/CsaV3_5G028490/CsaV3_6G004010/CsaV3_3G009790/CsaV3_3G036910/CsaV3_2G015280/CsaV3_5G003980/CsaV3_2G003650/CsaV3_1G039980/CsaV3_2G034200/CsaV3_5G005340/CsaV3_4G031080/CsaV3_4G029990/CsaV3_5G034910/CsaV3_6G006270/CsaV3_3G023460/CsaV3_5G000230/CsaV3_4G025880/CsaV3_1G046070/CsaV3_4G037690/CsaV3_7G006840/CsaV3_2G028640/CsaV3_5G038830/CsaV3_1G016970/CsaV3_4G008960/CsaV3_5G028690/CsaV3_2G0…	CsaV3_6G048080/CsaV3_5G028490/CsaV3_6G004010/CsaV3_3G009790/CsaV3_3G036910/CsaV3_2G015280/CsaV3_5G003980/CsaV3_2G003650/CsaV3_1G039980/CsaV3_2G034200/CsaV3_5G005340/CsaV3_4G031080/CsaV3_4G029990/CsaV3_5G034910/CsaV3_6G006270/CsaV3_3G023460/CsaV3_5G000230/CsaV3_4G025880/CsaV3_1G046070/CsaV3_4G037690/CsaV3_7G006840/CsaV3_2G028640/CsaV3_5G038830/CsaV3_1G016970/CsaV3_4G008960/CsaV3_5G028690/CsaV3_2G0…	csv:101211230/csv:101212988/csv:101205576/csv:101215805/csv:101209429/csv:101204323/csv:101215470/csv:101208699/csv:101202739/csv:101209273/csv:101216892/csv:101206809/csv:101203574/csv:101211316/csv:101206943/csv:101220704/csv:101206872/csv:101211927/csv:101215219/csv:101208728/csv:101206118/csv:101217944/csv:101209197/csv:101223065/csv:101219465/csv:101218080/csv:101222586	27	7	CsaV3_3G009790/CsaV3_5G003980/CsaV3_4G029990/CsaV3_6G006270/CsaV3_7G006840/CsaV3_5G028690/CsaV3_2G030420	20	CsaV3_6G048080/CsaV3_5G028490/CsaV3_6G004010/CsaV3_3G036910/CsaV3_2G015280/CsaV3_2G003650/CsaV3_1G039980/CsaV3_2G034200/CsaV3_5G005340/CsaV3_4G031080/CsaV3_5G034910/CsaV3_3G023460/CsaV3_5G000230/CsaV3_4G025880/CsaV3_1G046070/CsaV3_4G037690/CsaV3_2G028640/CsaV3_5G038830/CsaV3_1G016970/CsaV3_4G008960
csv01212	Fatty acid metabolism	37/2230	66/4159	0.392206	0.999874	CsaV3_4G008750/CsaV3_3G043300/CsaV3_4G023750/CsaV3_3G011240/CsaV3_2G003700/CsaV3_2G011380/CsaV3_6G028580/CsaV3_3G014880/CsaV3_2G002490/CsaV3_2G034560/CsaV3_2G002170/CsaV3_1G036540/CsaV3_6G023960/CsaV3_4G029830/CsaV3_4G004790/CsaV3_3G013480/CsaV3_2G025420/CsaV3_5G004440/CsaV3_1G042350/CsaV3_1G041340/CsaV3_5G023610/CsaV3_UNG144110/CsaV3_6G025240/CsaV3_6G023910/CsaV3_6G030990/CsaV3_4G024940/CsaV3_4G…	CsaV3_4G008750/CsaV3_3G043300/CsaV3_4G023750/CsaV3_3G011240/CsaV3_2G003700/CsaV3_2G011380/CsaV3_6G028580/CsaV3_3G014880/CsaV3_2G002490/CsaV3_2G034560/CsaV3_2G002170/CsaV3_1G036540/CsaV3_6G023960/CsaV3_4G029830/CsaV3_4G004790/CsaV3_3G013480/CsaV3_2G025420/CsaV3_5G004440/CsaV3_1G042350/CsaV3_1G041340/CsaV3_5G023610/CsaV3_UNG144110/CsaV3_6G025240/CsaV3_6G023910/CsaV3_6G030990/CsaV3_4G024940/CsaV3_4G…	csv:101222930/csv:101205498/csv:101210519/csv:101217710/csv:101207970/csv:101212301/csv:101221248/csv:101207559/csv:101206509/csv:101220632/csv:101209359/csv:101205913/csv:101218899/csv:101221707/csv:101207195/csv:101207461/csv:101220831/csv:101222521/csv:101217385/csv:101213530/csv:101212380/csv:101218159/csv:101218899/csv:101218899/csv:101204316/csv:101213758/csv:101210209/csv:101218899/csv:101…	37	21	CsaV3_4G008750/CsaV3_4G023750/CsaV3_2G003700/CsaV3_2G034560/CsaV3_1G036540/CsaV3_6G023960/CsaV3_4G029830/CsaV3_4G004790/CsaV3_1G042350/CsaV3_1G041340/CsaV3_5G023610/CsaV3_UNG144110/CsaV3_6G025240/CsaV3_4G025950/CsaV3_5G003990/CsaV3_6G025310/CsaV3_4G028240/CsaV3_6G024110/CsaV3_1G032580/CsaV3_3G038870/CsaV3_2G025310	16	CsaV3_3G043300/CsaV3_3G011240/CsaV3_2G011380/CsaV3_6G028580/CsaV3_3G014880/CsaV3_2G002490/CsaV3_2G002170/CsaV3_3G013480/CsaV3_2G025420/CsaV3_5G004440/CsaV3_6G023910/CsaV3_6G030990/CsaV3_4G024940/novel.818/CsaV3_5G026640/CsaV3_6G022310
csv00073	Cutin, suberine and wax biosynthesis	14/2230	24/4159	0.399865	0.999874	CsaV3_3G010290/CsaV3_6G006560/CsaV3_2G009920/CsaV3_3G031760/CsaV3_6G004090/CsaV3_3G010300/CsaV3_5G035630/CsaV3_5G002710/CsaV3_1G036060/CsaV3_1G030900/CsaV3_6G014940/CsaV3_3G043880/CsaV3_3G010310/CsaV3_5G037050	CsaV3_3G010290/CsaV3_6G006560/CsaV3_2G009920/CsaV3_3G031760/CsaV3_6G004090/CsaV3_3G010300/CsaV3_5G035630/CsaV3_5G002710/CsaV3_1G036060/CsaV3_1G030900/CsaV3_6G014940/CsaV3_3G043880/CsaV3_3G010310/CsaV3_5G037050	csv:101221193/csv:101222843/csv:101205541/csv:101222831/csv:101206763/csv:101203441/csv:101217068/csv:101216733/csv:101214516/csv:101212905/csv:101209297/csv:101205454/csv:101203691/csv:101213829	14	8	CsaV3_6G006560/CsaV3_6G004090/CsaV3_3G010300/CsaV3_5G035630/CsaV3_6G014940/CsaV3_3G043880/CsaV3_3G010310/CsaV3_5G037050	6	CsaV3_3G010290/CsaV3_2G009920/CsaV3_3G031760/CsaV3_5G002710/CsaV3_1G036060/CsaV3_1G030900
csv00100	Steroid biosynthesis	15/2230	26/4159	0.414758	0.999874	CsaV3_3G046140/CsaV3_3G032010/CsaV3_7G030530/CsaV3_3G036770/CsaV3_2G025870/CsaV3_4G027880/CsaV3_7G033590/CsaV3_6G051670/CsaV3_3G032020/CsaV3_3G003250/CsaV3_1G009570/CsaV3_7G033720/CsaV3_4G035350/CsaV3_4G002230/CsaV3_4G028790	CsaV3_3G046140/CsaV3_3G032010/CsaV3_7G030530/CsaV3_3G036770/CsaV3_2G025870/CsaV3_4G027880/CsaV3_7G033590/CsaV3_6G051670/CsaV3_3G032020/CsaV3_3G003250/CsaV3_1G009570/CsaV3_7G033720/CsaV3_4G035350/CsaV3_4G002230/CsaV3_4G028790	csv:101220177/csv:101217151/csv:101213648/csv:101207322/csv:101213038/csv:101220288/csv:101217431/csv:101221194/csv:101217389/csv:101211692/csv:101215719/csv:101215997/csv:101204949/csv:101205062/csv:101204738	15	10	CsaV3_3G046140/CsaV3_3G032010/CsaV3_7G030530/CsaV3_2G025870/CsaV3_7G033590/CsaV3_6G051670/CsaV3_3G032020/CsaV3_1G009570/CsaV3_4G002230/CsaV3_4G028790	5	CsaV3_3G036770/CsaV3_4G027880/CsaV3_3G003250/CsaV3_7G033720/CsaV3_4G035350
csv00460	Cyanoamino acid metabolism	22/2230	39/4159	0.426299	0.999874	CsaV3_3G022670/CsaV3_1G039010/CsaV3_2G001680/CsaV3_1G036000/CsaV3_2G008170/CsaV3_6G045790/CsaV3_3G044560/CsaV3_3G043060/CsaV3_1G007040/CsaV3_6G000650/CsaV3_4G034720/CsaV3_2G008210/CsaV3_1G015110/CsaV3_6G043980/CsaV3_1G010960/CsaV3_4G028640/CsaV3_1G004550/CsaV3_3G019180/CsaV3_2G010460/CsaV3_3G040580/CsaV3_6G032510/CsaV3_2G011710	CsaV3_3G022670/CsaV3_1G039010/CsaV3_2G001680/CsaV3_1G036000/CsaV3_2G008170/CsaV3_6G045790/CsaV3_3G044560/CsaV3_3G043060/CsaV3_1G007040/CsaV3_6G000650/CsaV3_4G034720/CsaV3_2G008210/CsaV3_1G015110/CsaV3_6G043980/CsaV3_1G010960/CsaV3_4G028640/CsaV3_1G004550/CsaV3_3G019180/CsaV3_2G010460/CsaV3_3G040580/CsaV3_6G032510/CsaV3_2G011710	csv:101217315/csv:101208927/csv:101221216/csv:101214999/csv:101213549/csv:101214973/csv:101215384/csv:101223112/csv:101218046/csv:101220896/csv:101218064/csv:101218493/csv:101209360/csv:101206142/csv:101209136/csv:101215287/csv:101204835/csv:101211272/csv:101220742/csv:101215343/csv:101202924/csv:101215910	22	5	CsaV3_2G008210/CsaV3_1G010960/CsaV3_1G004550/CsaV3_2G010460/CsaV3_6G032510	17	CsaV3_3G022670/CsaV3_1G039010/CsaV3_2G001680/CsaV3_1G036000/CsaV3_2G008170/CsaV3_6G045790/CsaV3_3G044560/CsaV3_3G043060/CsaV3_1G007040/CsaV3_6G000650/CsaV3_4G034720/CsaV3_1G015110/CsaV3_6G043980/CsaV3_4G028640/CsaV3_3G019180/CsaV3_3G040580/CsaV3_2G011710
csv00480	Glutathione metabolism	43/2230	78/4159	0.439394	0.999874	CsaV3_4G007720/CsaV3_7G029060/CsaV3_3G011460/CsaV3_6G034310/CsaV3_2G001680/CsaV3_3G011450/CsaV3_5G031670/CsaV3_4G025770/CsaV3_6G045790/CsaV3_4G025650/CsaV3_4G006000/CsaV3_4G025630/CsaV3_7G029050/CsaV3_5G000580/CsaV3_1G005440/CsaV3_4G025690/CsaV3_4G025660/CsaV3_6G047320/CsaV3_3G047650/CsaV3_5G002900/CsaV3_4G025680/CsaV3_3G015450/CsaV3_6G042080/CsaV3_5G002830/CsaV3_4G025750/CsaV3_3G035350/CsaV3_4G0…	CsaV3_4G007720/CsaV3_7G029060/CsaV3_3G011460/CsaV3_6G034310/CsaV3_2G001680/CsaV3_3G011450/CsaV3_5G031670/CsaV3_4G025770/CsaV3_6G045790/CsaV3_4G025650/CsaV3_4G006000/CsaV3_4G025630/CsaV3_7G029050/CsaV3_5G000580/CsaV3_1G005440/CsaV3_4G025690/CsaV3_4G025660/CsaV3_6G047320/CsaV3_3G047650/CsaV3_5G002900/CsaV3_4G025680/CsaV3_3G015450/CsaV3_6G042080/CsaV3_5G002830/CsaV3_4G025750/CsaV3_3G035350/CsaV3_4G0…	csv:101218083/csv:101212291/csv:101207634/csv:101216755/csv:101221216/csv:101207387/csv:101213410/csv:101214992/csv:101214973/csv:101220464/csv:101211608/csv:105434443/csv:101212536/csv:101222254/csv:101203519/csv:105435246/csv:101215228/csv:101220337/csv:101210336/csv:101220688/csv:101214992/csv:101203261/csv:101210105/csv:101218859/csv:101214027/csv:101211241/csv:101206809/csv:101203574/csv:101…	43	17	CsaV3_7G029060/CsaV3_6G034310/CsaV3_4G025630/CsaV3_7G029050/CsaV3_5G000580/CsaV3_6G047320/CsaV3_3G047650/CsaV3_3G015450/CsaV3_6G042080/CsaV3_4G029990/novel.7/CsaV3_5G002680/CsaV3_3G027630/CsaV3_6G021870/CsaV3_5G006450/CsaV3_2G014010/CsaV3_1G039210	26	CsaV3_4G007720/CsaV3_3G011460/CsaV3_2G001680/CsaV3_3G011450/CsaV3_5G031670/CsaV3_4G025770/CsaV3_6G045790/CsaV3_4G025650/CsaV3_4G006000/CsaV3_1G005440/CsaV3_4G025690/CsaV3_4G025660/CsaV3_5G002900/CsaV3_4G025680/CsaV3_5G002830/CsaV3_4G025750/CsaV3_3G035350/CsaV3_4G031080/CsaV3_3G028000/CsaV3_4G025760/CsaV3_7G029040/CsaV3_1G033510/CsaV3_1G008370/CsaV3_3G011090/CsaV3_5G038830/CsaV3_2G024480
csv00960	Tropane, piperidine and pyridine alkaloid biosynthesis	120866	21/4159	0.460334	0.999874	CsaV3_5G003790/CsaV3_3G034620/CsaV3_6G038150/CsaV3_5G003800/CsaV3_7G022600/CsaV3_4G033420/CsaV3_3G047470/CsaV3_1G034560/CsaV3_3G034610/CsaV3_7G033390/CsaV3_1G013270/CsaV3_4G000360	CsaV3_5G003790/CsaV3_3G034620/CsaV3_6G038150/CsaV3_5G003800/CsaV3_7G022600/CsaV3_4G033420/CsaV3_3G047470/CsaV3_1G034560/CsaV3_3G034610/CsaV3_7G033390/CsaV3_1G013270/CsaV3_4G000360	csv:101213059/csv:101205728/csv:101222468/csv:101212818/csv:101210998/csv:101212407/csv:101213892/csv:101206180/csv:101206201/csv:101220201/csv:101217299/csv:101212914	12	3	CsaV3_6G038150/CsaV3_1G034560/CsaV3_4G000360	9	CsaV3_5G003790/CsaV3_3G034620/CsaV3_5G003800/CsaV3_7G022600/CsaV3_4G033420/CsaV3_3G047470/CsaV3_3G034610/CsaV3_7G033390/CsaV3_1G013270
csv00061	Fatty acid biosynthesis	19/2230	34/4159	0.464634	0.999874	CsaV3_4G008750/CsaV3_3G043300/CsaV3_4G023750/CsaV3_2G003700/CsaV3_2G002490/CsaV3_1G036540/CsaV3_4G029830/CsaV3_4G004790/CsaV3_3G013480/CsaV3_2G025420/CsaV3_1G042350/CsaV3_1G041340/CsaV3_5G023610/CsaV3_6G030990/CsaV3_4G025950/CsaV3_5G003990/CsaV3_4G028240/CsaV3_1G032580/CsaV3_2G025310	CsaV3_4G008750/CsaV3_3G043300/CsaV3_4G023750/CsaV3_2G003700/CsaV3_2G002490/CsaV3_1G036540/CsaV3_4G029830/CsaV3_4G004790/CsaV3_3G013480/CsaV3_2G025420/CsaV3_1G042350/CsaV3_1G041340/CsaV3_5G023610/CsaV3_6G030990/CsaV3_4G025950/CsaV3_5G003990/CsaV3_4G028240/CsaV3_1G032580/CsaV3_2G025310	csv:101222930/csv:101205498/csv:101210519/csv:101207970/csv:101206509/csv:101205913/csv:101221707/csv:101207195/csv:101207461/csv:101220831/csv:101217385/csv:101213530/csv:101212380/csv:101204316/csv:101210209/csv:101215700/csv:101218462/csv:101210781/csv:101221932	19	14	CsaV3_4G008750/CsaV3_4G023750/CsaV3_2G003700/CsaV3_1G036540/CsaV3_4G029830/CsaV3_4G004790/CsaV3_1G042350/CsaV3_1G041340/CsaV3_5G023610/CsaV3_4G025950/CsaV3_5G003990/CsaV3_4G028240/CsaV3_1G032580/CsaV3_2G025310	5	CsaV3_3G043300/CsaV3_2G002490/CsaV3_3G013480/CsaV3_2G025420/CsaV3_6G030990
csv00280	Valine, leucine and isoleucine degradation	26/2230	47/4159	0.466373	0.999874	CsaV3_6G000070/CsaV3_1G001600/CsaV3_6G041570/CsaV3_3G011240/CsaV3_6G038810/CsaV3_3G015370/CsaV3_2G011380/CsaV3_6G028580/CsaV3_3G014880/CsaV3_3G033240/CsaV3_3G014830/CsaV3_2G004110/CsaV3_4G026970/CsaV3_3G019040/CsaV3_6G044420/CsaV3_7G008530/CsaV3_1G043650/CsaV3_6G044860/CsaV3_1G041530/CsaV3_4G004900/CsaV3_6G034530/CsaV3_2G025820/CsaV3_3G040810/CsaV3_6G000060/CsaV3_7G034360/CsaV3_3G002440	CsaV3_6G000070/CsaV3_1G001600/CsaV3_6G041570/CsaV3_3G011240/CsaV3_6G038810/CsaV3_3G015370/CsaV3_2G011380/CsaV3_6G028580/CsaV3_3G014880/CsaV3_3G033240/CsaV3_3G014830/CsaV3_2G004110/CsaV3_4G026970/CsaV3_3G019040/CsaV3_6G044420/CsaV3_7G008530/CsaV3_1G043650/CsaV3_6G044860/CsaV3_1G041530/CsaV3_4G004900/CsaV3_6G034530/CsaV3_2G025820/CsaV3_3G040810/CsaV3_6G000060/CsaV3_7G034360/CsaV3_3G002440	csv:101207718/csv:101209430/csv:101205130/csv:101217710/csv:101203798/csv:101222823/csv:101212301/csv:101221248/csv:101207559/csv:101203709/csv:101206829/csv:101202756/csv:101210304/csv:101221094/csv:101217437/csv:101204438/csv:101222552/csv:101207178/csv:101216174/csv:101208662/csv:101216977/csv:101214004/csv:101207316/csv:101207718/csv:101205436/csv:101203900	26	8	CsaV3_6G000070/CsaV3_3G015370/CsaV3_4G026970/CsaV3_6G044420/CsaV3_1G043650/CsaV3_4G004900/CsaV3_6G000060/CsaV3_3G002440	18	CsaV3_1G001600/CsaV3_6G041570/CsaV3_3G011240/CsaV3_6G038810/CsaV3_2G011380/CsaV3_6G028580/CsaV3_3G014880/CsaV3_3G033240/CsaV3_3G014830/CsaV3_2G004110/CsaV3_3G019040/CsaV3_7G008530/CsaV3_6G044860/CsaV3_1G041530/CsaV3_6G034530/CsaV3_2G025820/CsaV3_3G040810/CsaV3_7G034360
csv00300	Lysine biosynthesis	120683	825358	0.468522	0.999874	CsaV3_2G033650/CsaV3_2G014950/CsaV3_7G021780/CsaV3_5G039900/CsaV3_4G014580/CsaV3_5G024880	CsaV3_2G033650/CsaV3_2G014950/CsaV3_7G021780/CsaV3_5G039900/CsaV3_4G014580/CsaV3_5G024880	csv:101216470/csv:101208417/csv:101222467/csv:101202843/csv:101217452/csv:101222001	6	5	CsaV3_2G014950/CsaV3_7G021780/CsaV3_5G039900/CsaV3_4G014580/CsaV3_5G024880	1	CsaV3_2G033650
csv00650	Butanoate metabolism	13/2230	23/4159	0.474096	0.999874	CsaV3_4G007370/CsaV3_4G007380/CsaV3_3G015070/CsaV3_6G038810/CsaV3_6G028580/CsaV3_5G020650/CsaV3_6G013440/CsaV3_5G014210/CsaV3_3G019500/CsaV3_3G043770/CsaV3_4G032320/CsaV3_3G040810/CsaV3_5G017320	CsaV3_4G007370/CsaV3_4G007380/CsaV3_3G015070/CsaV3_6G038810/CsaV3_6G028580/CsaV3_5G020650/CsaV3_6G013440/CsaV3_5G014210/CsaV3_3G019500/CsaV3_3G043770/CsaV3_4G032320/CsaV3_3G040810/CsaV3_5G017320	csv:101211530/csv:101220932/csv:101209903/csv:101203798/csv:101221248/csv:101216119/csv:101217352/csv:101212902/csv:101221475/csv:101203992/csv:101219660/csv:101207316/csv:101214676	13	4	CsaV3_6G013440/CsaV3_5G014210/CsaV3_3G043770/CsaV3_5G017320	9	CsaV3_4G007370/CsaV3_4G007380/CsaV3_3G015070/CsaV3_6G038810/CsaV3_6G028580/CsaV3_5G020650/CsaV3_3G019500/CsaV3_4G032320/CsaV3_3G040810
csv00350	Tyrosine metabolism	20/2230	36/4159	0.47526	0.999874	CsaV3_5G003790/CsaV3_7G024990/CsaV3_6G038150/CsaV3_6G031750/CsaV3_5G003800/CsaV3_7G024950/CsaV3_4G008430/CsaV3_2G019530/CsaV3_7G022600/CsaV3_4G033420/CsaV3_3G047470/CsaV3_1G012000/CsaV3_6G007280/CsaV3_7G024980/CsaV3_7G033390/CsaV3_1G007740/CsaV3_1G013270/CsaV3_4G000360/CsaV3_5G001590/CsaV3_7G024960	CsaV3_5G003790/CsaV3_7G024990/CsaV3_6G038150/CsaV3_6G031750/CsaV3_5G003800/CsaV3_7G024950/CsaV3_4G008430/CsaV3_2G019530/CsaV3_7G022600/CsaV3_4G033420/CsaV3_3G047470/CsaV3_1G012000/CsaV3_6G007280/CsaV3_7G024980/CsaV3_7G033390/CsaV3_1G007740/CsaV3_1G013270/CsaV3_4G000360/CsaV3_5G001590/CsaV3_7G024960	csv:101213059/csv:101206036/csv:101222468/csv:101212881/csv:101212818/csv:101209854/csv:101206356/csv:101213302/csv:101210998/csv:101212407/csv:101213892/csv:101219021/csv:101208145/csv:101209854/csv:101220201/csv:101212994/csv:101217299/csv:101212914/csv:101210776/csv:101206036	20	8	CsaV3_6G038150/CsaV3_1G012000/CsaV3_6G007280/CsaV3_7G024980/CsaV3_1G007740/CsaV3_4G000360/CsaV3_5G001590/CsaV3_7G024960	12	CsaV3_5G003790/CsaV3_7G024990/CsaV3_6G031750/CsaV3_5G003800/CsaV3_7G024950/CsaV3_4G008430/CsaV3_2G019530/CsaV3_7G022600/CsaV3_4G033420/CsaV3_3G047470/CsaV3_7G033390/CsaV3_1G013270
csv00900	Terpenoid backbone biosynthesis	27/2230	49/4159	0.475341	0.999874	CsaV3_3G006930/CsaV3_5G014680/CsaV3_6G002810/CsaV3_2G031800/CsaV3_7G006800/CsaV3_7G023860/CsaV3_6G042470/CsaV3_1G002370/CsaV3_2G005140/CsaV3_5G035560/CsaV3_7G021880/CsaV3_7G010240/CsaV3_1G001500/CsaV3_3G008710/CsaV3_7G001340/CsaV3_4G003310/CsaV3_3G006740/CsaV3_2G036400/CsaV3_7G002170/CsaV3_6G005870/CsaV3_1G031250/CsaV3_1G041900/CsaV3_2G014440/CsaV3_4G006100/CsaV3_6G018900/CsaV3_6G035980/CsaV3_6G0…	CsaV3_3G006930/CsaV3_5G014680/CsaV3_6G002810/CsaV3_2G031800/CsaV3_7G006800/CsaV3_7G023860/CsaV3_6G042470/CsaV3_1G002370/CsaV3_2G005140/CsaV3_5G035560/CsaV3_7G021880/CsaV3_7G010240/CsaV3_1G001500/CsaV3_3G008710/CsaV3_7G001340/CsaV3_4G003310/CsaV3_3G006740/CsaV3_2G036400/CsaV3_7G002170/CsaV3_6G005870/CsaV3_1G031250/CsaV3_1G041900/CsaV3_2G014440/CsaV3_4G006100/CsaV3_6G018900/CsaV3_6G035980/CsaV3_6G0…	csv:101218190/csv:101210090/csv:101210090/csv:101220427/csv:101205649/csv:101217388/csv:101203974/csv:101221755/csv:101211331/csv:101210057/csv:101204450/csv:101212295/csv:101207716/csv:101219049/csv:101213533/csv:101212104/csv:101212112/csv:101219590/csv:101219178/csv:101223195/csv:101207760/csv:101221308/csv:101205824/csv:101212970/csv:101213470/csv:101210779/csv:101214927	27	13	CsaV3_6G002810/CsaV3_2G031800/CsaV3_7G023860/CsaV3_1G002370/CsaV3_7G010240/CsaV3_1G001500/CsaV3_7G001340/CsaV3_3G006740/CsaV3_2G036400/CsaV3_1G041900/CsaV3_4G006100/CsaV3_6G018900/CsaV3_6G005620	14	CsaV3_3G006930/CsaV3_5G014680/CsaV3_7G006800/CsaV3_6G042470/CsaV3_2G005140/CsaV3_5G035560/CsaV3_7G021880/CsaV3_3G008710/CsaV3_4G003310/CsaV3_7G002170/CsaV3_6G005870/CsaV3_1G031250/CsaV3_2G014440/CsaV3_6G035980
csv03013	RNA transport	78/2230	144/4159	0.481162	0.999874	CsaV3_1G003550/CsaV3_7G003030/CsaV3_2G035660/CsaV3_7G021830/CsaV3_5G015740/CsaV3_7G003720/CsaV3_5G027880/CsaV3_3G002080/CsaV3_3G009410/CsaV3_1G037230/CsaV3_3G019240/CsaV3_3G046890/CsaV3_4G031880/CsaV3_4G027730/CsaV3_2G010940/CsaV3_5G000410/CsaV3_7G027560/CsaV3_3G005110/CsaV3_7G025160/CsaV3_2G036420/CsaV3_4G004840/CsaV3_1G044620/CsaV3_6G009050/CsaV3_6G052120/CsaV3_3G041110/CsaV3_1G033610/CsaV3_2G0…	CsaV3_1G003550/CsaV3_7G003030/CsaV3_2G035660/CsaV3_7G021830/CsaV3_5G015740/CsaV3_7G003720/CsaV3_5G027880/CsaV3_3G002080/CsaV3_3G009410/CsaV3_1G037230/CsaV3_3G019240/CsaV3_3G046890/CsaV3_4G031880/CsaV3_4G027730/CsaV3_2G010940/CsaV3_5G000410/CsaV3_7G027560/CsaV3_3G005110/CsaV3_7G025160/CsaV3_2G036420/CsaV3_4G004840/CsaV3_1G044620/CsaV3_6G009050/CsaV3_6G052120/CsaV3_3G041110/CsaV3_1G033610/CsaV3_2G0…	csv:101214144/csv:101207840/csv:101208997/csv:101202908/csv:101212476/csv:101219651/csv:101221461/csv:101214107/csv:101209745/csv:101209344/csv:101203990/csv:101221977/csv:101216970/csv:101205199/csv:101202754/csv:101203580/csv:101217528/csv:101214921/csv:101204360/csv:101218722/csv:101213308/csv:101221223/csv:101215672/csv:101219057/csv:101211648/csv:101221953/csv:101219711/csv:101217025/csv:101…	78	49	CsaV3_5G015740/CsaV3_5G027880/CsaV3_3G002080/CsaV3_3G009410/CsaV3_1G037230/CsaV3_3G019240/CsaV3_3G046890/CsaV3_4G031880/CsaV3_4G027730/CsaV3_2G010940/CsaV3_7G027560/CsaV3_7G025160/CsaV3_2G036420/CsaV3_4G004840/CsaV3_1G044620/CsaV3_6G009050/CsaV3_3G041110/CsaV3_1G037240/CsaV3_3G039830/CsaV3_1G043080/CsaV3_6G037860/CsaV3_7G007080/CsaV3_7G034250/CsaV3_1G014700/CsaV3_4G034360/CsaV3_1G034540/CsaV3_5G0…	29	CsaV3_1G003550/CsaV3_7G003030/CsaV3_2G035660/CsaV3_7G021830/CsaV3_7G003720/CsaV3_5G000410/CsaV3_3G005110/CsaV3_6G052120/CsaV3_1G033610/CsaV3_2G031840/CsaV3_2G004470/CsaV3_2G012490/CsaV3_7G024240/CsaV3_1G003560/CsaV3_4G010150/CsaV3_4G036460/CsaV3_1G024130/CsaV3_3G041940/CsaV3_6G017140/CsaV3_1G023010/CsaV3_1G029120/CsaV3_1G041930/CsaV3_6G043210/CsaV3_5G024790/CsaV3_4G003350/CsaV3_3G043200/CsaV3_3G0…
csv00040	Pentose and glucuronate interconversions	42/2230	77/4159	0.481441	0.999874	CsaV3_7G026200/CsaV3_6G049200/CsaV3_7G033930/CsaV3_7G029590/CsaV3_3G011280/CsaV3_1G039880/CsaV3_4G025310/CsaV3_4G025330/CsaV3_1G038620/CsaV3_3G047910/CsaV3_3G028700/CsaV3_4G005340/CsaV3_7G029580/CsaV3_2G012050/CsaV3_6G036230/CsaV3_3G000050/CsaV3_1G009130/CsaV3_7G030240/CsaV3_2G034200/CsaV3_5G027030/CsaV3_3G021110/CsaV3_4G008770/CsaV3_1G041370/CsaV3_5G031360/CsaV3_3G016710/CsaV3_7G026220/CsaV3_2G0…	CsaV3_7G026200/CsaV3_6G049200/CsaV3_7G033930/CsaV3_7G029590/CsaV3_3G011280/CsaV3_1G039880/CsaV3_4G025310/CsaV3_4G025330/CsaV3_1G038620/CsaV3_3G047910/CsaV3_3G028700/CsaV3_4G005340/CsaV3_7G029580/CsaV3_2G012050/CsaV3_6G036230/CsaV3_3G000050/CsaV3_1G009130/CsaV3_7G030240/CsaV3_2G034200/CsaV3_5G027030/CsaV3_3G021110/CsaV3_4G008770/CsaV3_1G041370/CsaV3_5G031360/CsaV3_3G016710/CsaV3_7G026220/CsaV3_2G0…	csv:101221055/csv:101216377/csv:101212388/csv:101205321/csv:101218188/csv:101215894/csv:101210436/csv:101209936/csv:101202977/csv:101205879/csv:101207204/csv:101222494/csv:101205557/csv:101217580/csv:101207268/csv:101207185/csv:101209736/csv:101217414/csv:101209273/csv:101220205/csv:101220298/csv:101222306/csv:101214012/csv:101212122/csv:101221690/csv:101220821/csv:101214883/csv:101218812/csv:101…	42	27	CsaV3_6G049200/CsaV3_3G011280/CsaV3_1G039880/CsaV3_4G025330/CsaV3_1G038620/CsaV3_3G028700/CsaV3_4G005340/CsaV3_7G029580/CsaV3_2G012050/CsaV3_1G009130/CsaV3_7G030240/CsaV3_3G021110/CsaV3_5G031360/CsaV3_3G016710/CsaV3_2G024360/CsaV3_1G007900/CsaV3_4G025300/CsaV3_2G015180/CsaV3_2G021070/CsaV3_7G032560/CsaV3_6G040000/CsaV3_7G027310/CsaV3_1G009070/CsaV3_7G031000/CsaV3_4G025320/CsaV3_3G016190/CsaV3_6G0…	15	CsaV3_7G026200/CsaV3_7G033930/CsaV3_7G029590/CsaV3_4G025310/CsaV3_3G047910/CsaV3_6G036230/CsaV3_3G000050/CsaV3_2G034200/CsaV3_5G027030/CsaV3_4G008770/CsaV3_1G041370/CsaV3_7G026220/CsaV3_1G043300/CsaV3_3G032100/CsaV3_5G018590
csv03440	Homologous recombination	37/2230	68/4159	0.497308	0.999874	novel.1204/CsaV3_3G026510/CsaV3_1G002970/CsaV3_3G046980/CsaV3_6G052190/CsaV3_7G029870/CsaV3_1G041430/CsaV3_UNG082660/CsaV3_UNG098730/CsaV3_2G022190/CsaV3_3G019190/CsaV3_UNG178380/CsaV3_UNG178370/CsaV3_1G006450/novel.1064/CsaV3_3G038830/CsaV3_5G035370/CsaV3_3G005270/CsaV3_6G031560/CsaV3_3G028200/CsaV3_4G033030/CsaV3_4G037390/CsaV3_5G036480/CsaV3_UNG142080/CsaV3_3G009800/CsaV3_4G037380/CsaV3_3G0443…	-/CsaV3_3G026510/CsaV3_1G002970/CsaV3_3G046980/CsaV3_6G052190/CsaV3_7G029870/CsaV3_1G041430/CsaV3_UNG082660/CsaV3_UNG098730/CsaV3_2G022190/CsaV3_3G019190/CsaV3_UNG178380/CsaV3_UNG178370/CsaV3_1G006450/-/CsaV3_3G038830/CsaV3_5G035370/CsaV3_3G005270/CsaV3_6G031560/CsaV3_3G028200/CsaV3_4G033030/CsaV3_4G037390/CsaV3_5G036480/CsaV3_UNG142080/CsaV3_3G009800/CsaV3_4G037380/CsaV3_3G044350/CsaV3_UNG040210…	csv:101210305/csv:101212525/csv:101208545/csv:101220176/csv:101212120/csv:101219784/csv:101214733/csv:101210305/csv:101210305/csv:101216994/csv:101211021/csv:101210305/csv:101210305/csv:101210420/csv:101210305/csv:101221438/csv:101205315/csv:101212518/csv:101214977/csv:101222995/csv:101202933/csv:101218075/csv:101219408/csv:101210305/csv:101216284/csv:101217839/csv:101217141/csv:101210305/csv:101…	37	26	CsaV3_1G002970/CsaV3_3G046980/CsaV3_6G052190/CsaV3_7G029870/CsaV3_1G041430/CsaV3_UNG082660/CsaV3_2G022190/CsaV3_3G019190/CsaV3_1G006450/novel.1064/CsaV3_3G038830/CsaV3_5G035370/CsaV3_3G005270/CsaV3_6G031560/CsaV3_3G028200/CsaV3_4G033030/CsaV3_4G037390/CsaV3_5G036480/CsaV3_UNG142080/CsaV3_4G037380/CsaV3_2G001420/CsaV3_4G001390/CsaV3_2G001430/CsaV3_6G042140/CsaV3_2G015070/CsaV3_3G010730	11	novel.1204/CsaV3_3G026510/CsaV3_UNG098730/CsaV3_UNG178380/CsaV3_UNG178370/CsaV3_3G009800/CsaV3_3G044350/CsaV3_UNG040210/CsaV3_UNG123970/CsaV3_3G039390/CsaV3_2G000040
csv00590	Arachidonic acid metabolism	120744	14/4159	0.504052	0.999874	CsaV3_2G001680/CsaV3_6G045790/CsaV3_5G030140/CsaV3_4G027880/CsaV3_5G002900/CsaV3_2G024290/CsaV3_1G004390/CsaV3_1G000030	CsaV3_2G001680/CsaV3_6G045790/CsaV3_5G030140/CsaV3_4G027880/CsaV3_5G002900/CsaV3_2G024290/CsaV3_1G004390/CsaV3_1G000030	csv:101221216/csv:101214973/csv:101215260/csv:101220288/csv:101220688/csv:101215364/csv:101221439/csv:101205654	8	0		8	CsaV3_2G001680/CsaV3_6G045790/CsaV3_5G030140/CsaV3_4G027880/CsaV3_5G002900/CsaV3_2G024290/CsaV3_1G004390/CsaV3_1G000030
csv00290	Valine, leucine and isoleucine biosynthesis	120775	16/4159	0.518191	0.999874	CsaV3_6G040210/CsaV3_5G014210/CsaV3_7G005980/CsaV3_6G044420/CsaV3_6G040230/CsaV3_2G025820/CsaV3_6G040240/CsaV3_3G011200/CsaV3_4G001800	CsaV3_6G040210/CsaV3_5G014210/CsaV3_7G005980/CsaV3_6G044420/CsaV3_6G040230/CsaV3_2G025820/CsaV3_6G040240/CsaV3_3G011200/CsaV3_4G001800	csv:101205445/csv:101212902/csv:101213336/csv:101217437/csv:101205680/csv:101214004/csv:101205909/csv:101217323/csv:101211790	9	8	CsaV3_6G040210/CsaV3_5G014210/CsaV3_7G005980/CsaV3_6G044420/CsaV3_6G040230/CsaV3_6G040240/CsaV3_3G011200/CsaV3_4G001800	1	CsaV3_2G025820
csv00950	Isoquinoline alkaloid biosynthesis	120775	16/4159	0.518191	0.999874	CsaV3_5G003790/CsaV3_6G038150/CsaV3_5G003800/CsaV3_7G022600/CsaV3_4G033420/CsaV3_3G047470/CsaV3_1G012000/CsaV3_1G013270/CsaV3_4G000360	CsaV3_5G003790/CsaV3_6G038150/CsaV3_5G003800/CsaV3_7G022600/CsaV3_4G033420/CsaV3_3G047470/CsaV3_1G012000/CsaV3_1G013270/CsaV3_4G000360	csv:101213059/csv:101222468/csv:101212818/csv:101210998/csv:101212407/csv:101213892/csv:101219021/csv:101217299/csv:101212914	9	3	CsaV3_6G038150/CsaV3_1G012000/CsaV3_4G000360	6	CsaV3_5G003790/CsaV3_5G003800/CsaV3_7G022600/CsaV3_4G033420/CsaV3_3G047470/CsaV3_1G013270
csv00514	Other types of O-glycan biosynthesis	120683	825389	0.597223	0.999874	CsaV3_4G027890/CsaV3_2G032270/CsaV3_3G027570/CsaV3_7G023280/CsaV3_6G035870/CsaV3_1G045020	CsaV3_4G027890/CsaV3_2G032270/CsaV3_3G027570/CsaV3_7G023280/CsaV3_6G035870/CsaV3_1G045020	csv:101203732/csv:101214063/csv:101221472/csv:101214097/csv:101220530/csv:101217983	6	1	CsaV3_7G023280	5	CsaV3_4G027890/CsaV3_2G032270/CsaV3_3G027570/CsaV3_6G035870/CsaV3_1G045020
csv04016	MAPK signaling pathway - plant	64/2230	121/4159	0.601357	0.999874	CsaV3_2G016430/CsaV3_7G006290/CsaV3_2G032070/CsaV3_4G030260/CsaV3_2G013830/CsaV3_6G004610/CsaV3_6G047720/CsaV3_4G030060/CsaV3_1G009350/CsaV3_4G037250/CsaV3_3G017270/CsaV3_5G014240/CsaV3_3G043720/CsaV3_1G042150/CsaV3_4G027680/CsaV3_6G052820/CsaV3_4G006620/CsaV3_6G004660/CsaV3_5G010560/CsaV3_2G005240/CsaV3_6G031490/CsaV3_3G008140/CsaV3_3G000410/CsaV3_7G029600/CsaV3_4G026530/CsaV3_4G006090/CsaV3_4G0…	CsaV3_2G016430/CsaV3_7G006290/CsaV3_2G032070/CsaV3_4G030260/CsaV3_2G013830/CsaV3_6G004610/CsaV3_6G047720/CsaV3_4G030060/CsaV3_1G009350/CsaV3_4G037250/CsaV3_3G017270/CsaV3_5G014240/CsaV3_3G043720/CsaV3_1G042150/CsaV3_4G027680/CsaV3_6G052820/CsaV3_4G006620/CsaV3_6G004660/CsaV3_5G010560/CsaV3_2G005240/CsaV3_6G031490/CsaV3_3G008140/CsaV3_3G000410/CsaV3_7G029600/CsaV3_4G026530/CsaV3_4G006090/CsaV3_4G0…	csv:101214276/csv:101216389/csv:101216639/csv:101214088/csv:101218625/csv:101214396/csv:101215333/csv:101209540/csv:101212831/csv:101202931/csv:101214961/csv:101213139/csv:101203499/csv:101206055/csv:101205905/csv:101205642/csv:101210301/csv:101215276/csv:101219833/csv:101209358/csv:101216662/csv:101211059/csv:101222731/csv:101205786/csv:101216106/csv:101212728/csv:101210773/csv:101214398/csv:101…	64	21	CsaV3_2G016430/CsaV3_1G009350/CsaV3_3G017270/CsaV3_5G014240/CsaV3_4G027680/CsaV3_2G005240/CsaV3_4G030140/CsaV3_4G036090/CsaV3_2G001350/CsaV3_4G009440/CsaV3_5G027600/CsaV3_3G007170/CsaV3_3G022370/CsaV3_2G014200/CsaV3_4G005380/CsaV3_4G036080/CsaV3_1G033200/CsaV3_1G007340/CsaV3_4G036070/CsaV3_4G012010/CsaV3_3G012390	43	CsaV3_7G006290/CsaV3_2G032070/CsaV3_4G030260/CsaV3_2G013830/CsaV3_6G004610/CsaV3_6G047720/CsaV3_4G030060/CsaV3_4G037250/CsaV3_3G043720/CsaV3_1G042150/CsaV3_6G052820/CsaV3_4G006620/CsaV3_6G004660/CsaV3_5G010560/CsaV3_6G031490/CsaV3_3G008140/CsaV3_3G000410/CsaV3_7G029600/CsaV3_4G026530/CsaV3_4G006090/CsaV3_6G001990/CsaV3_1G041870/CsaV3_3G022000/CsaV3_3G049190/CsaV3_6G051540/CsaV3_2G004370/CsaV3_1G0…
csv00531	Glycosaminoglycan degradation	120744	15/4159	0.61251	0.999874	CsaV3_5G033170/CsaV3_3G043840/CsaV3_1G005790/CsaV3_2G009420/CsaV3_1G002710/CsaV3_2G003320/CsaV3_2G016140/CsaV3_3G015010	CsaV3_5G033170/CsaV3_3G043840/CsaV3_1G005790/CsaV3_2G009420/CsaV3_1G002710/CsaV3_2G003320/CsaV3_2G016140/CsaV3_3G015010	csv:101214214/csv:101204972/csv:101220813/csv:101211792/csv:101205085/csv:101213905/csv:101220222/csv:101213640	8	7	CsaV3_5G033170/CsaV3_3G043840/CsaV3_1G005790/CsaV3_2G009420/CsaV3_2G003320/CsaV3_2G016140/CsaV3_3G015010	1	CsaV3_1G002710
csv00640	Propanoate metabolism	20/2230	38/4159	0.613702	0.999874	CsaV3_6G000070/CsaV3_4G008750/CsaV3_6G041570/CsaV3_2G003700/CsaV3_3G015370/CsaV3_6G028580/CsaV3_3G014830/CsaV3_2G034560/CsaV3_4G029830/CsaV3_5G004440/CsaV3_5G023610/CsaV3_UNG144110/CsaV3_1G043650/CsaV3_6G044860/CsaV3_3G020130/CsaV3_6G007490/CsaV3_1G041530/CsaV3_4G025950/CsaV3_6G034530/CsaV3_6G000060	CsaV3_6G000070/CsaV3_4G008750/CsaV3_6G041570/CsaV3_2G003700/CsaV3_3G015370/CsaV3_6G028580/CsaV3_3G014830/CsaV3_2G034560/CsaV3_4G029830/CsaV3_5G004440/CsaV3_5G023610/CsaV3_UNG144110/CsaV3_1G043650/CsaV3_6G044860/CsaV3_3G020130/CsaV3_6G007490/CsaV3_1G041530/CsaV3_4G025950/CsaV3_6G034530/CsaV3_6G000060	csv:101207718/csv:101222930/csv:101205130/csv:101207970/csv:101222823/csv:101221248/csv:101206829/csv:101220632/csv:101221707/csv:101222521/csv:101212380/csv:101218159/csv:101222552/csv:101207178/csv:101203579/csv:101205496/csv:101216174/csv:101210209/csv:101216977/csv:101207718	20	12	CsaV3_6G000070/CsaV3_4G008750/CsaV3_2G003700/CsaV3_3G015370/CsaV3_2G034560/CsaV3_4G029830/CsaV3_5G023610/CsaV3_UNG144110/CsaV3_1G043650/CsaV3_6G007490/CsaV3_4G025950/CsaV3_6G000060	8	CsaV3_6G041570/CsaV3_6G028580/CsaV3_3G014830/CsaV3_5G004440/CsaV3_6G044860/CsaV3_3G020130/CsaV3_1G041530/CsaV3_6G034530
csv00670	One carbon pool by folate	120775	17/4159	0.619362	0.999874	CsaV3_1G010620/CsaV3_6G005110/CsaV3_2G014940/CsaV3_1G042270/CsaV3_4G028640/CsaV3_3G019180/CsaV3_3G017690/CsaV3_1G010170/CsaV3_2G011710	CsaV3_1G010620/CsaV3_6G005110/CsaV3_2G014940/CsaV3_1G042270/CsaV3_4G028640/CsaV3_3G019180/CsaV3_3G017690/CsaV3_1G010170/CsaV3_2G011710	csv:101209820/csv:101222878/csv:101208660/csv:101216190/csv:101215287/csv:101211272/csv:101207238/csv:101206006/csv:101215910	9	5	CsaV3_1G010620/CsaV3_6G005110/CsaV3_1G042270/CsaV3_3G017690/CsaV3_1G010170	4	CsaV3_2G014940/CsaV3_4G028640/CsaV3_3G019180/CsaV3_2G011710
csv00909	Sesquiterpenoid and triterpenoid biosynthesis	120775	17/4159	0.619362	0.999874	CsaV3_3G003660/CsaV3_3G003670/CsaV3_2G025870/CsaV3_2G004770/CsaV3_3G005760/CsaV3_3G005740/CsaV3_3G003650/CsaV3_3G003680/CsaV3_4G035350	CsaV3_3G003660/CsaV3_3G003670/CsaV3_2G025870/CsaV3_2G004770/CsaV3_3G005760/CsaV3_3G005740/CsaV3_3G003650/CsaV3_3G003680/CsaV3_4G035350	csv:101202882/csv:101202882/csv:101213038/csv:101216643/csv:101211697/csv:101211540/csv:101210313/csv:101207046/csv:101204949	9	2	CsaV3_2G025870/CsaV3_3G003680	7	CsaV3_3G003660/CsaV3_3G003670/CsaV3_2G004770/CsaV3_3G005760/CsaV3_3G005740/CsaV3_3G003650/CsaV3_4G035350
csv01040	Biosynthesis of unsaturated fatty acids	120836	21/4159	0.631897	0.999874	CsaV3_3G011240/CsaV3_2G011380/CsaV3_2G034560/CsaV3_2G025420/CsaV3_5G004440/CsaV3_UNG144110/CsaV3_6G030990/CsaV3_4G024940/CsaV3_3G008950/CsaV3_5G026640/CsaV3_3G038870	CsaV3_3G011240/CsaV3_2G011380/CsaV3_2G034560/CsaV3_2G025420/CsaV3_5G004440/CsaV3_UNG144110/CsaV3_6G030990/CsaV3_4G024940/CsaV3_3G008950/CsaV3_5G026640/CsaV3_3G038870	csv:101217710/csv:101212301/csv:101220632/csv:101220831/csv:101222521/csv:101218159/csv:101204316/csv:101213758/csv:101222848/csv:101213758/csv:101222623	11	3	CsaV3_2G034560/CsaV3_UNG144110/CsaV3_3G038870	8	CsaV3_3G011240/CsaV3_2G011380/CsaV3_2G025420/CsaV3_5G004440/CsaV3_6G030990/CsaV3_4G024940/CsaV3_3G008950/CsaV3_5G026640
csv02010	ABC transporters	120836	21/4159	0.631897	0.999874	CsaV3_3G021800/CsaV3_5G037960/CsaV3_3G035990/CsaV3_4G011860/CsaV3_6G052240/CsaV3_5G029720/CsaV3_3G023110/CsaV3_5G005630/CsaV3_3G032770/CsaV3_3G048950/CsaV3_5G026260	CsaV3_3G021800/CsaV3_5G037960/CsaV3_3G035990/CsaV3_4G011860/CsaV3_6G052240/CsaV3_5G029720/CsaV3_3G023110/CsaV3_5G005630/CsaV3_3G032770/CsaV3_3G048950/CsaV3_5G026260	csv:101210136/csv:101212585/csv:101220974/csv:101206409/csv:101209905/csv:101202823/csv:101213474/csv:101211598/csv:101211576/csv:101219304/csv:101219839	11	6	CsaV3_5G037960/CsaV3_3G035990/CsaV3_4G011860/CsaV3_5G029720/CsaV3_3G048950/CsaV3_5G026260	5	CsaV3_3G021800/CsaV3_6G052240/CsaV3_3G023110/CsaV3_5G005630/CsaV3_3G032770
csv00565	Ether lipid metabolism	120866	23/4159	0.637686	0.999874	CsaV3_5G033710/CsaV3_6G022720/CsaV3_4G027880/CsaV3_7G032480/CsaV3_1G043430/CsaV3_6G005980/CsaV3_6G016260/CsaV3_1G013550/CsaV3_3G009390/CsaV3_2G032050/CsaV3_2G028530/CsaV3_6G047530	CsaV3_5G033710/CsaV3_6G022720/CsaV3_4G027880/CsaV3_7G032480/CsaV3_1G043430/CsaV3_6G005980/CsaV3_6G016260/CsaV3_1G013550/CsaV3_3G009390/CsaV3_2G032050/CsaV3_2G028530/CsaV3_6G047530	csv:101207886/csv:101211856/csv:101220288/csv:101206113/csv:101218054/csv:101218942/csv:101211426/csv:101220610/csv:101209255/csv:101207900/csv:101218421/csv:101217251	12	2	CsaV3_2G032050/CsaV3_6G047530	10	CsaV3_5G033710/CsaV3_6G022720/CsaV3_4G027880/CsaV3_7G032480/CsaV3_1G043430/CsaV3_6G005980/CsaV3_6G016260/CsaV3_1G013550/CsaV3_3G009390/CsaV3_2G028530
csv00591	Linoleic acid metabolism	120866	23/4159	0.637686	0.999874	novel.506/CsaV3_2G006380/CsaV3_6G038170/CsaV3_2G023210/CsaV3_4G023930/CsaV3_4G027880/CsaV3_2G005370/CsaV3_4G023920/CsaV3_2G006390/CsaV3_2G023220/CsaV3_4G023830/CsaV3_5G030460	-/CsaV3_2G006380/CsaV3_6G038170/CsaV3_2G023210/CsaV3_4G023930/CsaV3_4G027880/CsaV3_2G005370/CsaV3_4G023920/CsaV3_2G006390/CsaV3_2G023220/CsaV3_4G023830/CsaV3_5G030460	csv:101214880/csv:101207406/csv:101215030/csv:101207406/csv:101209041/csv:101220288/csv:101207901/csv:101214639/csv:105434554/csv:101207163/csv:101216079/csv:101209343	12	5	novel.506/CsaV3_2G005370/CsaV3_4G023920/CsaV3_2G006390/CsaV3_2G023220	7	CsaV3_2G006380/CsaV3_6G038170/CsaV3_2G023210/CsaV3_4G023930/CsaV3_4G027880/CsaV3_4G023830/CsaV3_5G030460
csv00620	Pyruvate metabolism	45/2230	86/4159	0.638395	0.999874	CsaV3_2G030720/CsaV3_3G048280/CsaV3_5G029170/CsaV3_6G000070/CsaV3_1G001600/CsaV3_4G008750/CsaV3_5G011130/CsaV3_3G005000/CsaV3_6G039890/CsaV3_6G040340/CsaV3_1G016950/CsaV3_2G003700/CsaV3_6G044640/CsaV3_3G015070/CsaV3_2G032870/CsaV3_1G009520/CsaV3_3G015370/CsaV3_4G002450/novel.1174/CsaV3_1G032330/CsaV3_1G039740/CsaV3_7G035320/CsaV3_UNG009100/CsaV3_2G013320/CsaV3_4G029830/CsaV3_3G021780/CsaV3_2G0041…	CsaV3_2G030720/CsaV3_3G048280/CsaV3_5G029170/CsaV3_6G000070/CsaV3_1G001600/CsaV3_4G008750/CsaV3_5G011130/CsaV3_3G005000/CsaV3_6G039890/CsaV3_6G040340/CsaV3_1G016950/CsaV3_2G003700/CsaV3_6G044640/CsaV3_3G015070/CsaV3_2G032870/CsaV3_1G009520/CsaV3_3G015370/CsaV3_4G002450/-/CsaV3_1G032330/CsaV3_1G039740/CsaV3_7G035320/CsaV3_UNG009100/CsaV3_2G013320/CsaV3_4G029830/CsaV3_3G021780/CsaV3_2G004110/CsaV3_…	csv:101218724/csv:101222382/csv:101212411/csv:101207718/csv:101209430/csv:101222930/csv:101207676/csv:101203268/csv:101221855/csv:101207102/csv:101222828/csv:101207970/csv:101220209/csv:101209903/csv:101205566/csv:101214523/csv:101222823/csv:101223148/csv:101212275/csv:101204247/csv:101219936/csv:101214072/csv:101212275/csv:101218017/csv:101221707/csv:101206887/csv:101202756/csv:101214377/csv:101…	45	20	CsaV3_6G000070/CsaV3_4G008750/CsaV3_1G016950/CsaV3_2G003700/CsaV3_3G015370/novel.1174/CsaV3_1G032330/CsaV3_2G013320/CsaV3_4G029830/CsaV3_3G021780/CsaV3_7G028870/CsaV3_5G031990/CsaV3_4G033150/CsaV3_5G023610/CsaV3_5G034210/CsaV3_4G025950/CsaV3_3G007460/CsaV3_1G013530/CsaV3_6G000060/CsaV3_6G008320	25	CsaV3_2G030720/CsaV3_3G048280/CsaV3_5G029170/CsaV3_1G001600/CsaV3_5G011130/CsaV3_3G005000/CsaV3_6G039890/CsaV3_6G040340/CsaV3_6G044640/CsaV3_3G015070/CsaV3_2G032870/CsaV3_1G009520/CsaV3_4G002450/CsaV3_1G039740/CsaV3_7G035320/CsaV3_UNG009100/CsaV3_2G004110/CsaV3_3G038380/CsaV3_6G048970/CsaV3_1G002350/CsaV3_3G020130/CsaV3_UNG096730/CsaV3_4G000590/CsaV3_7G034360/novel.575
csv00710	Carbon fixation in photosynthetic organisms	40/2230	77/4159	0.660537	0.999874	CsaV3_2G030720/CsaV3_3G048280/CsaV3_5G031200/CsaV3_5G028490/CsaV3_3G031010/CsaV3_6G004010/CsaV3_3G009790/CsaV3_3G036910/CsaV3_2G015280/CsaV3_3G001220/CsaV3_6G044640/CsaV3_5G008880/novel.1174/CsaV3_7G033940/CsaV3_1G009420/CsaV3_1G039740/CsaV3_7G035320/CsaV3_UNG009100/CsaV3_2G034200/CsaV3_3G047470/CsaV3_6G013500/CsaV3_7G028870/CsaV3_5G034910/CsaV3_7G022930/CsaV3_6G001210/CsaV3_3G020110/CsaV3_6G0062…	CsaV3_2G030720/CsaV3_3G048280/CsaV3_5G031200/CsaV3_5G028490/CsaV3_3G031010/CsaV3_6G004010/CsaV3_3G009790/CsaV3_3G036910/CsaV3_2G015280/CsaV3_3G001220/CsaV3_6G044640/CsaV3_5G008880/-/CsaV3_7G033940/CsaV3_1G009420/CsaV3_1G039740/CsaV3_7G035320/CsaV3_UNG009100/CsaV3_2G034200/CsaV3_3G047470/CsaV3_6G013500/CsaV3_7G028870/CsaV3_5G034910/CsaV3_7G022930/CsaV3_6G001210/CsaV3_3G020110/CsaV3_6G006270/CsaV3_…	csv:101218724/csv:101222382/csv:101213570/csv:101212988/csv:101207254/csv:101205576/csv:101215805/csv:101209429/csv:101204323/csv:101208330/csv:101220209/csv:101209723/csv:101212275/csv:101212146/csv:101213319/csv:101219936/csv:101214072/csv:101212275/csv:101209273/csv:101213892/csv:101215670/csv:101214377/csv:101211316/csv:101215513/csv:101214545/csv:101202856/csv:101206943/csv:101208329/csv:101…	40	14	CsaV3_3G009790/CsaV3_3G001220/novel.1174/CsaV3_6G013500/CsaV3_7G028870/CsaV3_6G001210/CsaV3_3G020110/CsaV3_6G006270/CsaV3_4G033150/CsaV3_4G037480/CsaV3_7G006840/CsaV3_3G007460/CsaV3_5G028690/CsaV3_3G035920	26	CsaV3_2G030720/CsaV3_3G048280/CsaV3_5G031200/CsaV3_5G028490/CsaV3_3G031010/CsaV3_6G004010/CsaV3_3G036910/CsaV3_2G015280/CsaV3_6G044640/CsaV3_5G008880/CsaV3_7G033940/CsaV3_1G009420/CsaV3_1G039740/CsaV3_7G035320/CsaV3_UNG009100/CsaV3_2G034200/CsaV3_3G047470/CsaV3_5G034910/CsaV3_7G022930/CsaV3_4G031770/CsaV3_1G002350/CsaV3_4G025880/CsaV3_UNG096730/CsaV3_2G024880/CsaV3_1G013270/novel.575
csv00400	Phenylalanine, tyrosine and tryptophan biosynthesis	21/2230	41/4159	0.680512	0.999874	CsaV3_3G043270/CsaV3_6G014760/CsaV3_7G006730/CsaV3_6G042130/CsaV3_4G033420/CsaV3_3G047470/CsaV3_6G001800/CsaV3_2G034880/CsaV3_1G044710/CsaV3_2G013730/CsaV3_2G017780/CsaV3_2G017660/CsaV3_1G013270/CsaV3_6G021500/CsaV3_4G000360/CsaV3_3G041000/CsaV3_5G010220/CsaV3_3G004760/CsaV3_6G045310/CsaV3_6G048980/CsaV3_4G031290	CsaV3_3G043270/CsaV3_6G014760/CsaV3_7G006730/CsaV3_6G042130/CsaV3_4G033420/CsaV3_3G047470/CsaV3_6G001800/CsaV3_2G034880/CsaV3_1G044710/CsaV3_2G013730/CsaV3_2G017780/CsaV3_2G017660/CsaV3_1G013270/CsaV3_6G021500/CsaV3_4G000360/CsaV3_3G041000/CsaV3_5G010220/CsaV3_3G004760/CsaV3_6G045310/CsaV3_6G048980/CsaV3_4G031290	csv:101222321/csv:101205753/csv:101221603/csv:101209860/csv:101212407/csv:101213892/csv:101217107/csv:101217625/csv:101220286/csv:101220215/csv:101213380/csv:101210546/csv:101217299/csv:101217934/csv:101212914/csv:101210658/csv:101202863/csv:101218330/csv:101207177/csv:101209833/csv:101203740	21	13	CsaV3_3G043270/CsaV3_6G014760/CsaV3_6G042130/CsaV3_6G001800/CsaV3_2G034880/CsaV3_1G044710/CsaV3_2G013730/CsaV3_6G021500/CsaV3_4G000360/CsaV3_3G041000/CsaV3_5G010220/CsaV3_3G004760/CsaV3_6G048980	8	CsaV3_7G006730/CsaV3_4G033420/CsaV3_3G047470/CsaV3_2G017780/CsaV3_2G017660/CsaV3_1G013270/CsaV3_6G045310/CsaV3_4G031290
csv00564	Glycerophospholipid metabolism	46/2230	89/4159	0.683934	0.999874	CsaV3_1G004320/CsaV3_2G033910/CsaV3_1G004330/CsaV3_4G002900/CsaV3_5G033710/CsaV3_2G031870/CsaV3_7G024460/CsaV3_6G022720/CsaV3_4G027880/CsaV3_4G001340/CsaV3_6G000600/CsaV3_1G038830/CsaV3_3G048840/CsaV3_6G002500/CsaV3_4G032370/CsaV3_7G032480/CsaV3_3G026730/CsaV3_6G002870/CsaV3_4G024550/CsaV3_7G006180/CsaV3_6G048570/CsaV3_1G043430/CsaV3_5G024850/CsaV3_4G027640/CsaV3_7G001740/CsaV3_6G005980/CsaV3_2G0…	CsaV3_1G004320/CsaV3_2G033910/CsaV3_1G004330/CsaV3_4G002900/CsaV3_5G033710/CsaV3_2G031870/CsaV3_7G024460/CsaV3_6G022720/CsaV3_4G027880/CsaV3_4G001340/CsaV3_6G000600/CsaV3_1G038830/CsaV3_3G048840/CsaV3_6G002500/CsaV3_4G032370/CsaV3_7G032480/CsaV3_3G026730/CsaV3_6G002870/CsaV3_4G024550/CsaV3_7G006180/CsaV3_6G048570/CsaV3_1G043430/CsaV3_5G024850/CsaV3_4G027640/CsaV3_7G001740/CsaV3_6G005980/CsaV3_2G0…	csv:101220498/csv:101213816/csv:101220267/csv:101216924/csv:101207886/csv:101218992/csv:101217425/csv:101211856/csv:101220288/csv:101218579/csv:101221758/csv:101222774/csv:101213494/csv:101212778/csv:101220769/csv:101206113/csv:101216746/csv:101209183/csv:101210022/csv:101221364/csv:101205074/csv:101218054/csv:101221307/csv:101203567/csv:101211796/csv:101218942/csv:101220795/csv:101209025/csv:101…	46	18	CsaV3_1G004320/CsaV3_1G004330/CsaV3_7G024460/CsaV3_4G001340/CsaV3_6G000600/CsaV3_3G048840/CsaV3_6G002870/CsaV3_6G048570/CsaV3_4G027640/CsaV3_3G035210/CsaV3_5G036950/CsaV3_5G006440/CsaV3_1G007140/CsaV3_2G032050/CsaV3_3G034040/CsaV3_6G009150/CsaV3_2G010330/CsaV3_6G047530	28	CsaV3_2G033910/CsaV3_4G002900/CsaV3_5G033710/CsaV3_2G031870/CsaV3_6G022720/CsaV3_4G027880/CsaV3_1G038830/CsaV3_6G002500/CsaV3_4G032370/CsaV3_7G032480/CsaV3_3G026730/CsaV3_4G024550/CsaV3_7G006180/CsaV3_1G043430/CsaV3_5G024850/CsaV3_7G001740/CsaV3_6G005980/CsaV3_2G028420/CsaV3_6G016260/CsaV3_1G013550/CsaV3_3G009390/CsaV3_6G012360/CsaV3_2G008260/CsaV3_5G034650/CsaV3_3G039170/CsaV3_1G032230/CsaV3_3G0…
csv00945	Stilbenoid, diarylheptanoid and gingerol biosynthesis	120683	825419	0.706667	0.999874	CsaV3_5G030330/CsaV3_7G003200/CsaV3_1G026620/CsaV3_3G039990/CsaV3_2G009070/CsaV3_7G008590	CsaV3_5G030330/CsaV3_7G003200/CsaV3_1G026620/CsaV3_3G039990/CsaV3_2G009070/CsaV3_7G008590	csv:101212121/csv:101216522/csv:101208511/csv:101217257/csv:101205537/csv:101205648	6	4	CsaV3_7G003200/CsaV3_1G026620/CsaV3_3G039990/CsaV3_7G008590	2	CsaV3_5G030330/CsaV3_2G009070
csv04933	AGE-RAGE signaling pathway in diabetic complications	120683	825419	0.706667	0.999874	CsaV3_2G034580/CsaV3_2G002140/CsaV3_5G010130/CsaV3_1G036200/CsaV3_2G016070/CsaV3_6G050550	CsaV3_2G034580/CsaV3_2G002140/CsaV3_5G010130/CsaV3_1G036200/CsaV3_2G016070/CsaV3_6G050550	csv:101220160/csv:101209852/csv:101212421/csv:101209542/csv:101219263/csv:101218591	6	4	CsaV3_2G034580/CsaV3_2G002140/CsaV3_5G010130/CsaV3_2G016070	2	CsaV3_1G036200/CsaV3_6G050550
csv01230	Biosynthesis of amino acids	106/2230	204/4159	0.712207	0.999874	CsaV3_5G023920/CsaV3_5G029170/CsaV3_5G031200/CsaV3_7G030560/CsaV3_6G040210/CsaV3_6G048080/CsaV3_5G028490/CsaV3_2G017260/CsaV3_1G000670/CsaV3_3G043270/CsaV3_3G031010/CsaV3_2G003740/CsaV3_3G009790/CsaV3_3G036910/CsaV3_2G015280/CsaV3_3G021030/CsaV3_2G004390/CsaV3_6G040340/CsaV3_1G039700/CsaV3_6G006290/CsaV3_6G045610/CsaV3_6G014760/CsaV3_1G016950/CsaV3_1G002920/CsaV3_6G047510/CsaV3_7G031480/CsaV3_7G0…	CsaV3_5G023920/CsaV3_5G029170/CsaV3_5G031200/CsaV3_7G030560/CsaV3_6G040210/CsaV3_6G048080/CsaV3_5G028490/CsaV3_2G017260/CsaV3_1G000670/CsaV3_3G043270/CsaV3_3G031010/CsaV3_2G003740/CsaV3_3G009790/CsaV3_3G036910/CsaV3_2G015280/CsaV3_3G021030/CsaV3_2G004390/CsaV3_6G040340/CsaV3_1G039700/CsaV3_6G006290/CsaV3_6G045610/CsaV3_6G014760/CsaV3_1G016950/CsaV3_1G002920/CsaV3_6G047510/CsaV3_7G031480/CsaV3_7G0…	csv:101215515/csv:101212411/csv:101213570/csv:101213413/csv:101205445/csv:101211230/csv:101212988/csv:101209304/csv:101215982/csv:101222321/csv:101207254/csv:101207481/csv:101215805/csv:101209429/csv:101204323/csv:101221473/csv:101218606/csv:101207102/csv:101219222/csv:101207674/csv:101211596/csv:101205753/csv:101222828/csv:101208305/csv:101217715/csv:101220412/csv:101221603/csv:101215470/csv:101…	106	57	CsaV3_6G040210/CsaV3_2G017260/CsaV3_3G043270/CsaV3_3G009790/CsaV3_6G006290/CsaV3_6G045610/CsaV3_6G014760/CsaV3_1G016950/CsaV3_1G002920/CsaV3_5G003980/CsaV3_2G014950/novel.389/CsaV3_6G042130/CsaV3_2G013320/CsaV3_3G021780/CsaV3_3G031190/CsaV3_6G013500/CsaV3_5G014210/CsaV3_6G001800/CsaV3_5G025000/CsaV3_7G005980/CsaV3_7G021780/CsaV3_6G001210/CsaV3_6G044420/CsaV3_6G006270/CsaV3_6G040230/CsaV3_5G039900…	49	CsaV3_5G023920/CsaV3_5G029170/CsaV3_5G031200/CsaV3_7G030560/CsaV3_6G048080/CsaV3_5G028490/CsaV3_1G000670/CsaV3_3G031010/CsaV3_2G003740/CsaV3_3G036910/CsaV3_2G015280/CsaV3_3G021030/CsaV3_2G004390/CsaV3_6G040340/CsaV3_1G039700/CsaV3_6G047510/CsaV3_7G031480/CsaV3_7G006730/CsaV3_6G000650/CsaV3_2G033650/CsaV3_6G040390/CsaV3_7G033940/CsaV3_1G039980/CsaV3_1G009420/CsaV3_2G034200/CsaV3_3G047470/CsaV3_5G0…
csv00920	Sulfur metabolism	15/2230	30/4159	0.720534	0.999874	CsaV3_3G012820/CsaV3_1G042860/CsaV3_2G004390/CsaV3_1G039700/CsaV3_6G048960/CsaV3_6G000650/CsaV3_6G041580/CsaV3_2G013360/CsaV3_3G043250/CsaV3_1G010690/CsaV3_1G013880/CsaV3_5G030130/CsaV3_5G004200/CsaV3_6G044100/novel.86	CsaV3_3G012820/CsaV3_1G042860/CsaV3_2G004390/CsaV3_1G039700/CsaV3_6G048960/CsaV3_6G000650/CsaV3_6G041580/CsaV3_2G013360/CsaV3_3G043250/CsaV3_1G010690/CsaV3_1G013880/CsaV3_5G030130/CsaV3_5G004200/CsaV3_6G044100/-	csv:101221111/csv:101214065/csv:101218606/csv:101219222/csv:101220567/csv:101220896/csv:101204881/csv:101218495/csv:101204776/csv:101211864/csv:101214714/csv:101216623/csv:101205151/csv:101204217/csv:101218979	15	3	CsaV3_6G041580/CsaV3_1G010690/CsaV3_5G004200	12	CsaV3_3G012820/CsaV3_1G042860/CsaV3_2G004390/CsaV3_1G039700/CsaV3_6G048960/CsaV3_6G000650/CsaV3_2G013360/CsaV3_3G043250/CsaV3_1G013880/CsaV3_5G030130/CsaV3_6G044100/novel.86
csv00195	Photosynthesis	25/2230	50/4159	0.745425	0.999874	CsaV3_6G052210/CsaV3_1G046680/CsaV3_4G007520/CsaV3_6G034480/CsaV3_6G042680/CsaV3_3G013420/CsaV3_6G052330/CsaV3_3G046150/CsaV3_2G010090/CsaV3_2G009680/CsaV3_3G025000/CsaV3_6G041600/CsaV3_3G049310/CsaV3_5G026220/CsaV3_1G015100/CsaV3_1G025480/CsaV3_1G011330/CsaV3_7G004300/CsaV3_3G000770/CsaV3_UNG203700/CsaV3_4G007360/CsaV3_7G004050/CsaV3_UNG201530/CsaV3_3G005120/CsaV3_3G004330	CsaV3_6G052210/CsaV3_1G046680/CsaV3_4G007520/CsaV3_6G034480/CsaV3_6G042680/CsaV3_3G013420/CsaV3_6G052330/CsaV3_3G046150/CsaV3_2G010090/CsaV3_2G009680/CsaV3_3G025000/CsaV3_6G041600/CsaV3_3G049310/CsaV3_5G026220/CsaV3_1G015100/CsaV3_1G025480/CsaV3_1G011330/CsaV3_7G004300/CsaV3_3G000770/CsaV3_UNG203700/CsaV3_4G007360/CsaV3_7G004050/CsaV3_UNG201530/CsaV3_3G005120/CsaV3_3G004330	csv:101209832/csv:101215480/csv:101214094/csv:101206477/csv:101203080/csv:101207214/csv:101216935/csv:101211484/csv:101203850/csv:101208674/csv:101223219/csv:101204396/csv:101221013/csv:101220312/csv:101209111/csv:3429275/csv:101209135/csv:101204833/csv:101216095/csv:3429375/csv:3429266/csv:101221828/csv:3429270/csv:101214682/csv:101218641	25	24	CsaV3_6G052210/CsaV3_1G046680/CsaV3_4G007520/CsaV3_6G034480/CsaV3_6G042680/CsaV3_3G013420/CsaV3_6G052330/CsaV3_3G046150/CsaV3_2G010090/CsaV3_2G009680/CsaV3_3G025000/CsaV3_6G041600/CsaV3_3G049310/CsaV3_5G026220/CsaV3_1G015100/CsaV3_1G025480/CsaV3_1G011330/CsaV3_7G004300/CsaV3_3G000770/CsaV3_UNG203700/CsaV3_4G007360/CsaV3_7G004050/CsaV3_UNG201530/CsaV3_3G004330	1	CsaV3_3G005120
csv00908	Zeatin biosynthesis	120805	21/4159	0.780198	0.999874	CsaV3_4G028960/CsaV3_5G039210/CsaV3_5G006200/CsaV3_6G018570/CsaV3_7G023250/CsaV3_3G013770/CsaV3_4G036030/CsaV3_4G008350/CsaV3_1G040500/CsaV3_4G027750	CsaV3_4G028960/CsaV3_5G039210/CsaV3_5G006200/CsaV3_6G018570/CsaV3_7G023250/CsaV3_3G013770/CsaV3_4G036030/CsaV3_4G008350/CsaV3_1G040500/CsaV3_4G027750	csv:101210219/csv:101215037/csv:101205347/csv:101215150/csv:101217223/csv:101204427/csv:101217899/csv:101207319/csv:101222481/csv:101222887	10	4	CsaV3_4G028960/CsaV3_4G008350/CsaV3_1G040500/CsaV3_4G027750	6	CsaV3_5G039210/CsaV3_5G006200/CsaV3_6G018570/CsaV3_7G023250/CsaV3_3G013770/CsaV3_4G036030
csv00340	Histidine metabolism	120744	17/4159	0.784576	0.999874	CsaV3_1G001600/CsaV3_6G005330/CsaV3_2G004110/CsaV3_5G025000/CsaV3_7G021940/CsaV3_4G032220/CsaV3_5G029840/CsaV3_7G034360	CsaV3_1G001600/CsaV3_6G005330/CsaV3_2G004110/CsaV3_5G025000/CsaV3_7G021940/CsaV3_4G032220/CsaV3_5G029840/CsaV3_7G034360	csv:101209430/csv:101204289/csv:101202756/csv:101203648/csv:101205184/csv:101207614/csv:101219620/csv:101205436	8	5	CsaV3_6G005330/CsaV3_5G025000/CsaV3_7G021940/CsaV3_4G032220/CsaV3_5G029840	3	CsaV3_1G001600/CsaV3_2G004110/CsaV3_7G034360
csv00051	Fructose and mannose metabolism	26/2230	53/4159	0.790909	0.999874	CsaV3_6G001370/CsaV3_6G048080/CsaV3_3G021590/CsaV3_2G001890/CsaV3_6G004010/CsaV3_3G036910/CsaV3_2G015280/CsaV3_6G039140/CsaV3_2G001860/CsaV3_6G006740/CsaV3_3G045830/CsaV3_1G039980/CsaV3_5G005580/CsaV3_3G016710/CsaV3_3G020950/CsaV3_3G023460/CsaV3_4G031770/CsaV3_4G025880/CsaV3_2G007730/CsaV3_1G046070/CsaV3_4G037690/CsaV3_7G006840/CsaV3_4G008960/CsaV3_2G001900/CsaV3_5G028690/CsaV3_6G046460	CsaV3_6G001370/CsaV3_6G048080/CsaV3_3G021590/CsaV3_2G001890/CsaV3_6G004010/CsaV3_3G036910/CsaV3_2G015280/CsaV3_6G039140/CsaV3_2G001860/CsaV3_6G006740/CsaV3_3G045830/CsaV3_1G039980/CsaV3_5G005580/CsaV3_3G016710/CsaV3_3G020950/CsaV3_3G023460/CsaV3_4G031770/CsaV3_4G025880/CsaV3_2G007730/CsaV3_1G046070/CsaV3_4G037690/CsaV3_7G006840/CsaV3_4G008960/CsaV3_2G001900/CsaV3_5G028690/CsaV3_6G046460	csv:101211496/csv:101211230/csv:101213621/csv:101218300/csv:101205576/csv:101209429/csv:101204323/csv:101208701/csv:101218300/csv:101213366/csv:101216058/csv:101202739/csv:101212568/csv:101221690/csv:101223130/csv:101220704/csv:101218311/csv:101211927/csv:101216327/csv:101215219/csv:101208728/csv:101206118/csv:101219465/csv:101218300/csv:101218080/csv:101222408	26	9	CsaV3_3G021590/CsaV3_2G001890/CsaV3_6G039140/CsaV3_3G045830/CsaV3_3G016710/CsaV3_7G006840/CsaV3_2G001900/CsaV3_5G028690/CsaV3_6G046460	17	CsaV3_6G001370/CsaV3_6G048080/CsaV3_6G004010/CsaV3_3G036910/CsaV3_2G015280/CsaV3_2G001860/CsaV3_6G006740/CsaV3_1G039980/CsaV3_5G005580/CsaV3_3G020950/CsaV3_3G023460/CsaV3_4G031770/CsaV3_4G025880/CsaV3_2G007730/CsaV3_1G046070/CsaV3_4G037690/CsaV3_4G008960
csv00380	Tryptophan metabolism	18/2230	38/4159	0.826326	0.999874	CsaV3_6G000070/CsaV3_1G001600/CsaV3_7G000850/CsaV3_3G017920/CsaV3_4G037250/CsaV3_3G015370/CsaV3_6G028580/CsaV3_1G039030/CsaV3_6G031490/CsaV3_2G004110/CsaV3_2G015790/CsaV3_5G033650/CsaV3_1G001250/CsaV3_7G000860/CsaV3_7G032920/CsaV3_7G028260/CsaV3_6G000060/CsaV3_7G034360	CsaV3_6G000070/CsaV3_1G001600/CsaV3_7G000850/CsaV3_3G017920/CsaV3_4G037250/CsaV3_3G015370/CsaV3_6G028580/CsaV3_1G039030/CsaV3_6G031490/CsaV3_2G004110/CsaV3_2G015790/CsaV3_5G033650/CsaV3_1G001250/CsaV3_7G000860/CsaV3_7G032920/CsaV3_7G028260/CsaV3_6G000060/CsaV3_7G034360	csv:101207718/csv:101209430/csv:101205749/csv:105434854/csv:101202931/csv:101222823/csv:101221248/csv:101209418/csv:101216662/csv:101202756/csv:101205119/csv:101208854/csv:101206363/csv:101204792/csv:101221824/csv:101222503/csv:101207718/csv:101205436	18	6	CsaV3_6G000070/CsaV3_7G000850/CsaV3_3G017920/CsaV3_3G015370/CsaV3_1G039030/CsaV3_6G000060	12	CsaV3_1G001600/CsaV3_4G037250/CsaV3_6G028580/CsaV3_6G031490/CsaV3_2G004110/CsaV3_2G015790/CsaV3_5G033650/CsaV3_1G001250/CsaV3_7G000860/CsaV3_7G032920/CsaV3_7G028260/CsaV3_7G034360
csv00053	Ascorbate and aldarate metabolism	21/2230	44/4159	0.826384	0.999874	CsaV3_3G005990/CsaV3_1G040000/CsaV3_6G034310/CsaV3_1G001600/CsaV3_7G022020/CsaV3_6G047320/CsaV3_3G047650/CsaV3_5G002470/CsaV3_1G017100/CsaV3_5G027030/CsaV3_2G004110/CsaV3_2G001660/CsaV3_4G008770/CsaV3_1G033510/CsaV3_6G040510/CsaV3_3G037070/CsaV3_6G021870/CsaV3_5G027310/CsaV3_5G013150/CsaV3_7G034360/CsaV3_6G032490	CsaV3_3G005990/CsaV3_1G040000/CsaV3_6G034310/CsaV3_1G001600/CsaV3_7G022020/CsaV3_6G047320/CsaV3_3G047650/CsaV3_5G002470/CsaV3_1G017100/CsaV3_5G027030/CsaV3_2G004110/CsaV3_2G001660/CsaV3_4G008770/CsaV3_1G033510/CsaV3_6G040510/CsaV3_3G037070/CsaV3_6G021870/CsaV3_5G027310/CsaV3_5G013150/CsaV3_7G034360/CsaV3_6G032490	csv:101206557/csv:101202978/csv:101216755/csv:101209430/csv:101205337/csv:101220337/csv:101210336/csv:101214011/csv:101217972/csv:101220205/csv:101202756/csv:101221451/csv:101222306/csv:101203032/csv:101210277/csv:101207933/csv:101221563/csv:101203883/csv:101206206/csv:101205436/csv:101203157	21	11	CsaV3_3G005990/CsaV3_6G034310/CsaV3_6G047320/CsaV3_3G047650/CsaV3_5G002470/CsaV3_2G001660/CsaV3_6G040510/CsaV3_3G037070/CsaV3_6G021870/CsaV3_5G013150/CsaV3_6G032490	10	CsaV3_1G040000/CsaV3_1G001600/CsaV3_7G022020/CsaV3_1G017100/CsaV3_5G027030/CsaV3_2G004110/CsaV3_4G008770/CsaV3_1G033510/CsaV3_5G027310/CsaV3_7G034360
csv03060	Protein export	21/2230	44/4159	0.826384	0.999874	CsaV3_2G002780/CsaV3_3G039230/CsaV3_2G007560/CsaV3_2G025100/CsaV3_2G028260/CsaV3_1G043340/CsaV3_6G034140/CsaV3_3G026970/CsaV3_1G039080/CsaV3_4G025830/CsaV3_1G029510/CsaV3_1G039570/CsaV3_4G006570/CsaV3_3G007400/CsaV3_3G015480/CsaV3_5G030350/CsaV3_4G008230/CsaV3_3G009150/CsaV3_1G009720/CsaV3_3G033870/CsaV3_5G001960	CsaV3_2G002780/CsaV3_3G039230/CsaV3_2G007560/CsaV3_2G025100/CsaV3_2G028260/CsaV3_1G043340/CsaV3_6G034140/CsaV3_3G026970/CsaV3_1G039080/CsaV3_4G025830/CsaV3_1G029510/CsaV3_1G039570/CsaV3_4G006570/CsaV3_3G007400/CsaV3_3G015480/CsaV3_5G030350/CsaV3_4G008230/CsaV3_3G009150/CsaV3_1G009720/CsaV3_3G033870/CsaV3_5G001960	csv:101222464/csv:101206918/csv:101217753/csv:101205346/csv:101222362/csv:101217111/csv:101221795/csv:101215372/csv:101210158/csv:101212893/csv:101222431/csv:101216624/csv:101223070/csv:101220008/csv:101204558/csv:101211317/csv:101206918/csv:101205155/csv:101220011/csv:101213655/csv:101207505	21	6	CsaV3_2G025100/CsaV3_1G029510/CsaV3_1G039570/CsaV3_3G015480/CsaV3_3G009150/CsaV3_3G033870	15	CsaV3_2G002780/CsaV3_3G039230/CsaV3_2G007560/CsaV3_2G028260/CsaV3_1G043340/CsaV3_6G034140/CsaV3_3G026970/CsaV3_1G039080/CsaV3_4G025830/CsaV3_4G006570/CsaV3_3G007400/CsaV3_5G030350/CsaV3_4G008230/CsaV3_1G009720/CsaV3_5G001960
csv03420	Nucleotide excision repair	24/2230	51/4159	0.861298	0.999874	CsaV3_1G002970/CsaV3_3G046980/CsaV3_6G016510/CsaV3_5G034230/CsaV3_6G038660/CsaV3_3G038830/CsaV3_4G010360/CsaV3_5G035370/CsaV3_3G005270/CsaV3_6G014300/CsaV3_4G033030/CsaV3_2G009350/CsaV3_2G026140/CsaV3_4G031600/CsaV3_6G012270/CsaV3_5G005370/CsaV3_5G008820/CsaV3_3G032680/CsaV3_3G003530/CsaV3_1G037020/CsaV3_3G041900/CsaV3_6G050060/CsaV3_3G022110/CsaV3_5G024160	CsaV3_1G002970/CsaV3_3G046980/CsaV3_6G016510/CsaV3_5G034230/CsaV3_6G038660/CsaV3_3G038830/CsaV3_4G010360/CsaV3_5G035370/CsaV3_3G005270/CsaV3_6G014300/CsaV3_4G033030/CsaV3_2G009350/CsaV3_2G026140/CsaV3_4G031600/CsaV3_6G012270/CsaV3_5G005370/CsaV3_5G008820/CsaV3_3G032680/CsaV3_3G003530/CsaV3_1G037020/CsaV3_3G041900/CsaV3_6G050060/CsaV3_3G022110/CsaV3_5G024160	csv:101208545/csv:101220176/csv:101208473/csv:101220491/csv:101204361/csv:101221438/csv:101216298/csv:101205315/csv:101212518/csv:101213447/csv:101202933/csv:101212755/csv:101209203/csv:101221072/csv:101212709/csv:101212151/csv:101213310/csv:101216636/csv:101208984/csv:101208613/csv:101221403/csv:101206831/csv:101222280/csv:101208462	24	18	CsaV3_1G002970/CsaV3_3G046980/CsaV3_6G016510/CsaV3_3G038830/CsaV3_5G035370/CsaV3_3G005270/CsaV3_6G014300/CsaV3_4G033030/CsaV3_2G009350/CsaV3_2G026140/CsaV3_4G031600/CsaV3_5G008820/CsaV3_3G032680/CsaV3_3G003530/CsaV3_1G037020/CsaV3_3G041900/CsaV3_6G050060/CsaV3_5G024160	6	CsaV3_5G034230/CsaV3_6G038660/CsaV3_4G010360/CsaV3_6G012270/CsaV3_5G005370/CsaV3_3G022110
csv01210	2-Oxocarboxylic acid metabolism	22/2230	47/4159	0.861773	0.999874	CsaV3_5G031200/CsaV3_3G031010/CsaV3_6G047510/CsaV3_7G031480/novel.389/CsaV3_7G033940/CsaV3_3G047470/CsaV3_5G014210/CsaV3_7G005980/CsaV3_1G001680/CsaV3_6G044420/CsaV3_3G035070/CsaV3_2G014210/CsaV3_6G015630/CsaV3_2G031570/CsaV3_2G025820/CsaV3_2G024880/CsaV3_1G013270/CsaV3_3G011200/CsaV3_6G010020/CsaV3_4G001800/CsaV3_5G024880	CsaV3_5G031200/CsaV3_3G031010/CsaV3_6G047510/CsaV3_7G031480/-/CsaV3_7G033940/CsaV3_3G047470/CsaV3_5G014210/CsaV3_7G005980/CsaV3_1G001680/CsaV3_6G044420/CsaV3_3G035070/CsaV3_2G014210/CsaV3_6G015630/CsaV3_2G031570/CsaV3_2G025820/CsaV3_2G024880/CsaV3_1G013270/CsaV3_3G011200/CsaV3_6G010020/CsaV3_4G001800/CsaV3_5G024880	csv:101213570/csv:101207254/csv:101217715/csv:101220412/csv:101220538/csv:101212146/csv:101213892/csv:101212902/csv:101213336/csv:101213747/csv:101217437/csv:101222699/csv:101213242/csv:101209376/csv:101203871/csv:101214004/csv:101207914/csv:101217299/csv:101217323/csv:101213747/csv:101211790/csv:101222001	22	9	novel.389/CsaV3_5G014210/CsaV3_7G005980/CsaV3_6G044420/CsaV3_3G035070/CsaV3_2G014210/CsaV3_3G011200/CsaV3_4G001800/CsaV3_5G024880	13	CsaV3_5G031200/CsaV3_3G031010/CsaV3_6G047510/CsaV3_7G031480/CsaV3_7G033940/CsaV3_3G047470/CsaV3_1G001680/CsaV3_6G015630/CsaV3_2G031570/CsaV3_2G025820/CsaV3_2G024880/CsaV3_1G013270/CsaV3_6G010020
csv00410	beta-Alanine metabolism	20/2230	43/4159	0.862751	0.999874	CsaV3_5G003790/CsaV3_7G030830/CsaV3_6G038150/CsaV3_5G003800/CsaV3_1G001600/CsaV3_6G038890/CsaV3_6G028580/CsaV3_7G022600/CsaV3_2G034560/CsaV3_5G020650/CsaV3_1G007330/CsaV3_2G004110/CsaV3_7G006870/CsaV3_5G004440/CsaV3_4G032140/CsaV3_UNG144110/CsaV3_1G043650/CsaV3_6G044860/CsaV3_5G017320/CsaV3_7G034360	CsaV3_5G003790/CsaV3_7G030830/CsaV3_6G038150/CsaV3_5G003800/CsaV3_1G001600/CsaV3_6G038890/CsaV3_6G028580/CsaV3_7G022600/CsaV3_2G034560/CsaV3_5G020650/CsaV3_1G007330/CsaV3_2G004110/CsaV3_7G006870/CsaV3_5G004440/CsaV3_4G032140/CsaV3_UNG144110/CsaV3_1G043650/CsaV3_6G044860/CsaV3_5G017320/CsaV3_7G034360	csv:101213059/csv:101209263/csv:101222468/csv:101212818/csv:101209430/csv:101204944/csv:101221248/csv:101210998/csv:101220632/csv:101216119/csv:101202899/csv:101202756/csv:101223016/csv:101222521/csv:101205765/csv:101218159/csv:101222552/csv:101207178/csv:101214676/csv:101205436	20	5	CsaV3_6G038150/CsaV3_2G034560/CsaV3_UNG144110/CsaV3_1G043650/CsaV3_5G017320	15	CsaV3_5G003790/CsaV3_7G030830/CsaV3_5G003800/CsaV3_1G001600/CsaV3_6G038890/CsaV3_6G028580/CsaV3_7G022600/CsaV3_5G020650/CsaV3_1G007330/CsaV3_2G004110/CsaV3_7G006870/CsaV3_5G004440/CsaV3_4G032140/CsaV3_6G044860/CsaV3_7G034360
csv03022	Basal transcription factors	16/2230	35/4159	0.866822	0.999874	CsaV3_7G003000/CsaV3_7G029840/CsaV3_2G033370/CsaV3_5G025800/novel.260/CsaV3_6G040610/CsaV3_2G009350/CsaV3_2G029190/CsaV3_4G028940/CsaV3_6G039860/CsaV3_1G041520/CsaV3_5G005370/CsaV3_3G028740/CsaV3_7G026510/CsaV3_6G050060/CsaV3_4G006050	CsaV3_7G003000/CsaV3_7G029840/CsaV3_2G033370/CsaV3_5G025800/-/CsaV3_6G040610/CsaV3_2G009350/CsaV3_2G029190/CsaV3_4G028940/CsaV3_6G039860/CsaV3_1G041520/CsaV3_5G005370/CsaV3_3G028740/CsaV3_7G026510/CsaV3_6G050060/CsaV3_4G006050	csv:101208326/csv:101223096/csv:101219951/csv:101212641/csv:101207087/csv:101211513/csv:101212755/csv:101210064/csv:101209725/csv:101222808/csv:101216807/csv:101212151/csv:101207693/csv:101212178/csv:101206831/csv:101211845	16	8	CsaV3_7G003000/CsaV3_7G029840/CsaV3_5G025800/novel.260/CsaV3_6G040610/CsaV3_2G009350/CsaV3_3G028740/CsaV3_6G050060	8	CsaV3_2G033370/CsaV3_2G029190/CsaV3_4G028940/CsaV3_6G039860/CsaV3_1G041520/CsaV3_5G005370/CsaV3_7G026510/CsaV3_4G006050
csv04144	Endocytosis	73/2230	148/4159	0.874983	0.999874	CsaV3_3G036240/CsaV3_6G009020/CsaV3_7G024760/CsaV3_4G002260/CsaV3_5G026450/CsaV3_7G005760/CsaV3_1G037330/CsaV3_5G036790/CsaV3_3G018320/CsaV3_2G009170/CsaV3_6G022720/CsaV3_3G035110/CsaV3_5G027290/CsaV3_7G034960/CsaV3_2G002330/CsaV3_4G003710/CsaV3_6G051030/CsaV3_7G034540/CsaV3_6G052350/CsaV3_2G011210/CsaV3_5G023290/CsaV3_1G040030/CsaV3_3G035010/CsaV3_3G045840/CsaV3_4G003850/CsaV3_3G020580/CsaV3_5G0…	CsaV3_3G036240/CsaV3_6G009020/CsaV3_7G024760/CsaV3_4G002260/CsaV3_5G026450/CsaV3_7G005760/CsaV3_1G037330/CsaV3_5G036790/CsaV3_3G018320/CsaV3_2G009170/CsaV3_6G022720/CsaV3_3G035110/CsaV3_5G027290/CsaV3_7G034960/CsaV3_2G002330/CsaV3_4G003710/CsaV3_6G051030/CsaV3_7G034540/CsaV3_6G052350/CsaV3_2G011210/CsaV3_5G023290/CsaV3_1G040030/CsaV3_3G035010/CsaV3_3G045840/CsaV3_4G003850/CsaV3_3G020580/CsaV3_5G0…	csv:101203066/csv:101206683/csv:101212307/csv:101203435/csv:101210925/csv:101209668/csv:101211569/csv:101220755/csv:101220748/csv:101215564/csv:101211856/csv:101207159/csv:105435011/csv:101216409/csv:101210509/csv:101208671/csv:101212843/csv:101202766/csv:101218116/csv:101210094/csv:101219958/csv:101203943/csv:101203303/csv:101215581/csv:101205627/csv:105434874/csv:101209471/csv:101206113/csv:101…	73	19	CsaV3_4G002260/CsaV3_5G026450/CsaV3_5G036790/CsaV3_6G051030/CsaV3_2G011210/CsaV3_5G023290/CsaV3_5G003600/CsaV3_4G028490/CsaV3_1G013580/CsaV3_6G035780/CsaV3_3G031710/CsaV3_6G052710/CsaV3_3G042540/CsaV3_2G032050/CsaV3_3G049140/CsaV3_5G026520/CsaV3_1G007110/CsaV3_6G047530/CsaV3_7G008260	54	CsaV3_3G036240/CsaV3_6G009020/CsaV3_7G024760/CsaV3_7G005760/CsaV3_1G037330/CsaV3_3G018320/CsaV3_2G009170/CsaV3_6G022720/CsaV3_3G035110/CsaV3_5G027290/CsaV3_7G034960/CsaV3_2G002330/CsaV3_4G003710/CsaV3_7G034540/CsaV3_6G052350/CsaV3_1G040030/CsaV3_3G035010/CsaV3_3G045840/CsaV3_4G003850/CsaV3_3G020580/CsaV3_7G032480/CsaV3_6G003390/CsaV3_3G004820/CsaV3_3G009580/CsaV3_6G005980/CsaV3_6G052700/CsaV3_7G0…
csv00760	Nicotinate and nicotinamide metabolism	120744	19/4159	0.892303	0.999874	CsaV3_1G042920/CsaV3_2G016480/CsaV3_5G027390/CsaV3_6G040600/CsaV3_4G008190/CsaV3_2G002690/CsaV3_1G008930/CsaV3_5G013570	CsaV3_1G042920/CsaV3_2G016480/CsaV3_5G027390/CsaV3_6G040600/CsaV3_4G008190/CsaV3_2G002690/CsaV3_1G008930/CsaV3_5G013570	csv:101214308/csv:101210953/csv:101205815/csv:101211263/csv:101209512/csv:101203635/csv:101208114/csv:101208793	8	6	CsaV3_2G016480/CsaV3_5G027390/CsaV3_6G040600/CsaV3_4G008190/CsaV3_1G008930/CsaV3_5G013570	2	CsaV3_1G042920/CsaV3_2G002690
csv04120	Ubiquitin mediated proteolysis	46/2230	97/4159	0.909909	0.999874	CsaV3_1G008320/CsaV3_2G035660/CsaV3_3G046770/CsaV3_5G032430/CsaV3_5G001220/CsaV3_4G027690/CsaV3_2G016190/CsaV3_5G036070/CsaV3_5G000720/CsaV3_5G002370/CsaV3_6G050140/CsaV3_4G007910/CsaV3_4G023570/CsaV3_6G039130/CsaV3_5G025240/CsaV3_6G031140/CsaV3_5G036390/CsaV3_3G032410/CsaV3_6G013200/CsaV3_4G008040/CsaV3_5G032450/CsaV3_5G026770/CsaV3_3G008830/CsaV3_3G013600/CsaV3_2G026140/CsaV3_1G030810/CsaV3_3G0…	CsaV3_1G008320/CsaV3_2G035660/CsaV3_3G046770/CsaV3_5G032430/CsaV3_5G001220/CsaV3_4G027690/CsaV3_2G016190/CsaV3_5G036070/CsaV3_5G000720/CsaV3_5G002370/CsaV3_6G050140/CsaV3_4G007910/CsaV3_4G023570/CsaV3_6G039130/CsaV3_5G025240/CsaV3_6G031140/CsaV3_5G036390/CsaV3_3G032410/CsaV3_6G013200/CsaV3_4G008040/CsaV3_5G032450/CsaV3_5G026770/CsaV3_3G008830/CsaV3_3G013600/CsaV3_2G026140/CsaV3_1G030810/CsaV3_3G0…	csv:101221105/csv:101208997/csv:101203062/csv:101223010/csv:101213539/csv:101205676/csv:101220698/csv:101209121/csv:101220694/csv:101213115/csv:101204759/csv:101214623/csv:101205198/csv:101208947/csv:101206294/csv:101220292/csv:101207006/csv:101208421/csv:101220979/csv:101212453/csv:101223010/csv:101215923/csv:101221190/csv:101209336/csv:101209203/csv:101220229/csv:101214341/csv:101205082/csv:101…	46	26	CsaV3_5G001220/CsaV3_4G027690/CsaV3_5G002370/CsaV3_4G007910/CsaV3_4G023570/CsaV3_6G039130/CsaV3_5G025240/CsaV3_3G032410/CsaV3_6G013200/CsaV3_5G026770/CsaV3_3G013600/CsaV3_2G026140/CsaV3_1G030810/CsaV3_3G050020/CsaV3_4G008470/CsaV3_5G031430/CsaV3_6G017350/CsaV3_3G042790/novel.877/CsaV3_6G007200/CsaV3_1G037020/CsaV3_1G000230/CsaV3_1G009770/CsaV3_1G045710/CsaV3_5G008620/CsaV3_6G015450	20	CsaV3_1G008320/CsaV3_2G035660/CsaV3_3G046770/CsaV3_5G032430/CsaV3_2G016190/CsaV3_5G036070/CsaV3_5G000720/CsaV3_6G050140/CsaV3_6G031140/CsaV3_5G036390/CsaV3_4G008040/CsaV3_5G032450/CsaV3_3G008830/CsaV3_6G014350/CsaV3_3G036630/CsaV3_3G019890/CsaV3_4G023310/CsaV3_6G042460/CsaV3_6G040090/CsaV3_1G035700
csv04145	Phagosome	29/2230	63/4159	0.910375	0.999874	CsaV3_5G002840/CsaV3_1G007130/CsaV3_3G030880/CsaV3_2G034580/CsaV3_3G039230/CsaV3_1G037170/CsaV3_3G035760/CsaV3_2G031740/CsaV3_7G007680/CsaV3_1G040420/CsaV3_3G026760/CsaV3_2G002140/CsaV3_3G026970/CsaV3_7G023490/CsaV3_1G029510/CsaV3_2G029210/CsaV3_7G001210/CsaV3_7G000200/CsaV3_2G029320/CsaV3_3G007400/CsaV3_4G008230/CsaV3_1G009720/CsaV3_2G016070/CsaV3_6G050550/CsaV3_6G021470/CsaV3_3G010990/CsaV3_7G0…	CsaV3_5G002840/CsaV3_1G007130/CsaV3_3G030880/CsaV3_2G034580/CsaV3_3G039230/CsaV3_1G037170/CsaV3_3G035760/CsaV3_2G031740/CsaV3_7G007680/CsaV3_1G040420/CsaV3_3G026760/CsaV3_2G002140/CsaV3_3G026970/CsaV3_7G023490/CsaV3_1G029510/CsaV3_2G029210/CsaV3_7G001210/CsaV3_7G000200/CsaV3_2G029320/CsaV3_3G007400/CsaV3_4G008230/CsaV3_1G009720/CsaV3_2G016070/CsaV3_6G050550/CsaV3_6G021470/CsaV3_3G010990/CsaV3_7G0…	csv:101219333/csv:101220108/csv:101208227/csv:101220160/csv:101206918/csv:101209837/csv:101216393/csv:101221052/csv:101213258/csv:101208426/csv:101217221/csv:101209852/csv:101215372/csv:101218255/csv:101222431/csv:101209817/csv:101211838/csv:101211364/csv:101209079/csv:101220008/csv:101206918/csv:101220011/csv:101219263/csv:101218591/csv:101216514/csv:101213721/csv:101216234/csv:101209079/csv:101…	29	5	CsaV3_5G002840/CsaV3_2G034580/CsaV3_2G002140/CsaV3_1G029510/CsaV3_2G016070	24	CsaV3_1G007130/CsaV3_3G030880/CsaV3_3G039230/CsaV3_1G037170/CsaV3_3G035760/CsaV3_2G031740/CsaV3_7G007680/CsaV3_1G040420/CsaV3_3G026760/CsaV3_3G026970/CsaV3_7G023490/CsaV3_2G029210/CsaV3_7G001210/CsaV3_7G000200/CsaV3_2G029320/CsaV3_3G007400/CsaV3_4G008230/CsaV3_1G009720/CsaV3_6G050550/CsaV3_6G021470/CsaV3_3G010990/CsaV3_7G033710/CsaV3_2G029310/CsaV3_7G021710
csv04141	Protein processing in endoplasmic reticulum	80/2230	164/4159	0.910951	0.999874	CsaV3_4G001560/CsaV3_1G038690/CsaV3_6G003940/CsaV3_1G038710/CsaV3_5G008760/CsaV3_6G024080/CsaV3_1G010860/CsaV3_3G002780/CsaV3_7G024760/CsaV3_4G001160/CsaV3_6G051910/CsaV3_3G017490/CsaV3_5G036070/CsaV3_5G026450/CsaV3_5G000720/CsaV3_3G039230/CsaV3_3G035900/CsaV3_2G009170/CsaV3_1G012230/CsaV3_3G012670/CsaV3_7G021800/CsaV3_7G029920/CsaV3_6G012970/CsaV3_4G033770/CsaV3_5G034230/CsaV3_3G027480/CsaV3_1G0…	CsaV3_4G001560/CsaV3_1G038690/CsaV3_6G003940/CsaV3_1G038710/CsaV3_5G008760/CsaV3_6G024080/CsaV3_1G010860/CsaV3_3G002780/CsaV3_7G024760/CsaV3_4G001160/CsaV3_6G051910/CsaV3_3G017490/CsaV3_5G036070/CsaV3_5G026450/CsaV3_5G000720/CsaV3_3G039230/CsaV3_3G035900/CsaV3_2G009170/CsaV3_1G012230/CsaV3_3G012670/CsaV3_7G021800/CsaV3_7G029920/CsaV3_6G012970/CsaV3_4G033770/CsaV3_5G034230/CsaV3_3G027480/CsaV3_1G0…	csv:101210969/csv:101207890/csv:101207000/csv:101221822/csv:101211939/csv:101210044/csv:101212573/csv:101219346/csv:101212307/csv:101221417/csv:101218356/csv:101210914/csv:101209121/csv:101210925/csv:101220694/csv:101206918/csv:101219394/csv:101215564/csv:101208731/csv:101216851/csv:101222942/csv:101221276/csv:101204208/csv:101206686/csv:101220491/csv:101210531/csv:101205422/csv:101222781/csv:101…	80	23	CsaV3_1G038690/CsaV3_1G038710/CsaV3_5G026450/CsaV3_3G035900/CsaV3_4G033770/CsaV3_1G044020/CsaV3_2G011210/CsaV3_6G013200/CsaV3_5G018740/CsaV3_6G047890/CsaV3_2G013200/CsaV3_1G035810/CsaV3_6G009480/CsaV3_5G008700/CsaV3_1G029510/CsaV3_3G000340/CsaV3_4G004150/CsaV3_3G032680/CsaV3_7G024640/CsaV3_3G041900/CsaV3_4G025150/CsaV3_5G026520/CsaV3_7G029820	57	CsaV3_4G001560/CsaV3_6G003940/CsaV3_5G008760/CsaV3_6G024080/CsaV3_1G010860/CsaV3_3G002780/CsaV3_7G024760/CsaV3_4G001160/CsaV3_6G051910/CsaV3_3G017490/CsaV3_5G036070/CsaV3_5G000720/CsaV3_3G039230/CsaV3_2G009170/CsaV3_1G012230/CsaV3_3G012670/CsaV3_7G021800/CsaV3_7G029920/CsaV3_6G012970/CsaV3_5G034230/CsaV3_3G027480/CsaV3_7G008470/CsaV3_6G036820/CsaV3_6G022320/CsaV3_3G038710/CsaV3_1G001780/CsaV3_1G0…
csv00750	Vitamin B6 metabolism	120652	13/4159	0.91579	0.999874	CsaV3_7G034880/CsaV3_3G033790/CsaV3_3G021680/CsaV3_6G016190/CsaV3_1G040240	CsaV3_7G034880/CsaV3_3G033790/CsaV3_3G021680/CsaV3_6G016190/CsaV3_1G040240	csv:101217360/csv:101212698/csv:101205462/csv:101213282/csv:101207641	5	2	CsaV3_3G021680/CsaV3_6G016190	3	CsaV3_7G034880/CsaV3_3G033790/CsaV3_1G040240
csv03410	Base excision repair	14/2230	33/4159	0.929113	0.999874	CsaV3_7G031900/CsaV3_6G046270/CsaV3_6G016510/CsaV3_6G013350/CsaV3_3G022600/CsaV3_6G034200/CsaV3_3G038830/CsaV3_4G010360/CsaV3_3G005270/CsaV3_6G014300/CsaV3_4G033030/CsaV3_5G031880/CsaV3_5G008820/CsaV3_6G047130	CsaV3_7G031900/CsaV3_6G046270/CsaV3_6G016510/CsaV3_6G013350/CsaV3_3G022600/CsaV3_6G034200/CsaV3_3G038830/CsaV3_4G010360/CsaV3_3G005270/CsaV3_6G014300/CsaV3_4G033030/CsaV3_5G031880/CsaV3_5G008820/CsaV3_6G047130	csv:101205558/csv:101219253/csv:101208473/csv:101218536/csv:101219129/csv:101219118/csv:101221438/csv:101216298/csv:101212518/csv:101213447/csv:101202933/csv:101209170/csv:101213310/csv:101222374	14	11	CsaV3_7G031900/CsaV3_6G016510/CsaV3_6G013350/CsaV3_3G022600/CsaV3_6G034200/CsaV3_3G038830/CsaV3_3G005270/CsaV3_6G014300/CsaV3_4G033030/CsaV3_5G031880/CsaV3_5G008820	3	CsaV3_6G046270/CsaV3_4G010360/CsaV3_6G047130
csv00941	Flavonoid biosynthesis	120713	18/4159	0.932389	0.999874	CsaV3_5G026140/CsaV3_5G030330/CsaV3_1G026620/CsaV3_3G039990/CsaV3_3G000790/CsaV3_2G009070/CsaV3_7G008590	CsaV3_5G026140/CsaV3_5G030330/CsaV3_1G026620/CsaV3_3G039990/CsaV3_3G000790/CsaV3_2G009070/CsaV3_7G008590	csv:101221017/csv:101212121/csv:101208511/csv:101217257/csv:101215613/csv:101205537/csv:101205648	7	5	CsaV3_5G026140/CsaV3_1G026620/CsaV3_3G039990/CsaV3_3G000790/CsaV3_7G008590	2	CsaV3_5G030330/CsaV3_2G009070
csv00740	Riboflavin metabolism	120652	14/4159	0.947226	0.999874	CsaV3_5G029010/CsaV3_5G027770/CsaV3_3G038770/CsaV3_6G003290/CsaV3_7G005640	CsaV3_5G029010/CsaV3_5G027770/CsaV3_3G038770/CsaV3_6G003290/CsaV3_7G005640	csv:101215305/csv:101221226/csv:101220971/csv:101212510/csv:101207959	5	3	CsaV3_5G029010/CsaV3_3G038770/CsaV3_7G005640	2	CsaV3_5G027770/CsaV3_6G003290
csv04130	SNARE interactions in vesicular transport	14/2230	34/4159	0.948775	0.999874	CsaV3_3G046300/CsaV3_3G030880/CsaV3_4G013350/CsaV3_3G035710/CsaV3_3G047800/CsaV3_3G041240/CsaV3_1G028720/CsaV3_1G027860/CsaV3_6G038420/CsaV3_6G008560/CsaV3_5G038260/CsaV3_4G002040/CsaV3_7G029670/CsaV3_3G038070	CsaV3_3G046300/CsaV3_3G030880/CsaV3_4G013350/CsaV3_3G035710/CsaV3_3G047800/CsaV3_3G041240/CsaV3_1G028720/CsaV3_1G027860/CsaV3_6G038420/CsaV3_6G008560/CsaV3_5G038260/CsaV3_4G002040/CsaV3_7G029670/CsaV3_3G038070	csv:101209595/csv:101208227/csv:101220775/csv:101219819/csv:101207709/csv:101213977/csv:101213209/csv:101208350/csv:101218607/csv:101212139/csv:101222163/csv:101207624/csv:101204192/csv:101208931	14	2	CsaV3_4G013350/CsaV3_1G027860	12	CsaV3_3G046300/CsaV3_3G030880/CsaV3_3G035710/CsaV3_3G047800/CsaV3_3G041240/CsaV3_1G028720/CsaV3_6G038420/CsaV3_6G008560/CsaV3_5G038260/CsaV3_4G002040/CsaV3_7G029670/CsaV3_3G038070
csv00970	Aminoacyl-tRNA biosynthesis	22/2230	51/4159	0.95056	0.999874	CsaV3_6G012710/CsaV3_1G012830/CsaV3_1G039910/CsaV3_3G048470/CsaV3_6G048760/CsaV3_3G046200/CsaV3_7G026620/CsaV3_7G002750/CsaV3_2G008510/CsaV3_5G013970/CsaV3_2G016280/CsaV3_3G047640/CsaV3_4G003190/CsaV3_4G017540/CsaV3_6G039980/CsaV3_3G046850/CsaV3_3G031480/CsaV3_5G021830/CsaV3_3G017690/CsaV3_6G008710/CsaV3_2G009270/CsaV3_1G038230	CsaV3_6G012710/CsaV3_1G012830/CsaV3_1G039910/CsaV3_3G048470/CsaV3_6G048760/CsaV3_3G046200/CsaV3_7G026620/CsaV3_7G002750/CsaV3_2G008510/CsaV3_5G013970/CsaV3_2G016280/CsaV3_3G047640/CsaV3_4G003190/CsaV3_4G017540/CsaV3_6G039980/CsaV3_3G046850/CsaV3_3G031480/CsaV3_5G021830/CsaV3_3G017690/CsaV3_6G008710/CsaV3_2G009270/CsaV3_1G038230	csv:101206513/csv:101213618/csv:101222059/csv:101219148/csv:101211315/csv:101210985/csv:101216192/csv:101211267/csv:101204394/csv:101203909/csv:101222339/csv:101207397/csv:101212830/csv:101217460/csv:101223046/csv:101222217/csv:101222905/csv:101220233/csv:101207238/csv:101209684/csv:101213236/csv:101218513	22	18	CsaV3_6G012710/CsaV3_1G012830/CsaV3_1G039910/CsaV3_3G048470/CsaV3_6G048760/CsaV3_3G046200/CsaV3_7G026620/CsaV3_2G008510/CsaV3_5G013970/CsaV3_3G047640/CsaV3_4G003190/CsaV3_4G017540/CsaV3_6G039980/CsaV3_3G031480/CsaV3_5G021830/CsaV3_3G017690/CsaV3_6G008710/CsaV3_1G038230	4	CsaV3_7G002750/CsaV3_2G016280/CsaV3_3G046850/CsaV3_2G009270
csv00450	Selenocompound metabolism	120683	17/4159	0.961414	0.999874	CsaV3_3G012820/CsaV3_2G013360/CsaV3_4G011840/CsaV3_3G000880/CsaV3_1G041720/CsaV3_3G043020	CsaV3_3G012820/CsaV3_2G013360/CsaV3_4G011840/CsaV3_3G000880/CsaV3_1G041720/CsaV3_3G043020	csv:101221111/csv:101218495/csv:101211038/csv:101214172/csv:101218702/csv:101222636	6	3	CsaV3_4G011840/CsaV3_1G041720/CsaV3_3G043020	3	CsaV3_3G012820/CsaV3_2G013360/CsaV3_3G000880
csv03008	Ribosome biogenesis in eukaryotes	36/2230	81/4159	0.962684	0.999874	novel.634/CsaV3_1G006340/CsaV3_3G040270/CsaV3_7G021670/CsaV3_1G005910/CsaV3_2G002790/CsaV3_2G019580/CsaV3_6G044000/CsaV3_6G040110/CsaV3_1G000680/CsaV3_2G025380/CsaV3_3G017360/CsaV3_1G038920/CsaV3_6G022650/CsaV3_2G031840/CsaV3_7G029310/CsaV3_2G009090/CsaV3_7G034610/CsaV3_3G022140/CsaV3_5G005970/CsaV3_7G021630/CsaV3_6G021640/CsaV3_UNG219500/CsaV3_7G024240/CsaV3_1G007630/CsaV3_3G049750/CsaV3_3G01035…	-/CsaV3_1G006340/CsaV3_3G040270/CsaV3_7G021670/CsaV3_1G005910/CsaV3_2G002790/CsaV3_2G019580/CsaV3_6G044000/CsaV3_6G040110/CsaV3_1G000680/CsaV3_2G025380/CsaV3_3G017360/CsaV3_1G038920/CsaV3_6G022650/CsaV3_2G031840/CsaV3_7G029310/CsaV3_2G009090/CsaV3_7G034610/CsaV3_3G022140/CsaV3_5G005970/CsaV3_7G021630/CsaV3_6G021640/CsaV3_UNG219500/CsaV3_7G024240/CsaV3_1G007630/CsaV3_3G049750/CsaV3_3G010350/CsaV3_…	csv:101221716/csv:101208691/csv:101219867/csv:101220903/csv:101222784/csv:101222939/csv:101212091/csv:101205903/csv:101203980/csv:101216223/csv:101221227/csv:101213750/csv:101207707/csv:101213788/csv:101219711/csv:101207643/csv:101216698/csv:101210104/csv:101221807/csv:101206527/csv:101222795/csv:101214103/csv:101217384/csv:101220274/csv:101208620/csv:101211694/csv:101204423/csv:101217731/csv:101…	36	23	novel.634/CsaV3_1G006340/CsaV3_3G040270/CsaV3_2G002790/CsaV3_2G019580/CsaV3_6G040110/CsaV3_1G000680/CsaV3_2G025380/CsaV3_3G017360/CsaV3_7G029310/CsaV3_2G009090/CsaV3_7G034610/CsaV3_3G022140/CsaV3_5G005970/CsaV3_7G021630/CsaV3_6G021640/CsaV3_3G010350/CsaV3_2G004440/CsaV3_5G013180/CsaV3_1G037130/CsaV3_1G029680/CsaV3_2G026240/CsaV3_3G003300	13	CsaV3_7G021670/CsaV3_1G005910/CsaV3_6G044000/CsaV3_1G038920/CsaV3_6G022650/CsaV3_2G031840/CsaV3_UNG219500/CsaV3_7G024240/CsaV3_1G007630/CsaV3_3G049750/CsaV3_5G037440/CsaV3_4G023210/CsaV3_UNG096720
csv00360	Phenylalanine metabolism	18/2230	44/4159	0.967922	0.999874	CsaV3_5G003790/CsaV3_6G038150/CsaV3_5G003800/CsaV3_6G039670/CsaV3_7G000850/CsaV3_6G028580/CsaV3_7G022600/CsaV3_1G039030/CsaV3_4G033420/CsaV3_3G047470/CsaV3_3G019500/CsaV3_2G015790/CsaV3_7G000860/CsaV3_7G033390/CsaV3_1G013270/CsaV3_6G039660/CsaV3_4G000360/CsaV3_4G002310	CsaV3_5G003790/CsaV3_6G038150/CsaV3_5G003800/CsaV3_6G039670/CsaV3_7G000850/CsaV3_6G028580/CsaV3_7G022600/CsaV3_1G039030/CsaV3_4G033420/CsaV3_3G047470/CsaV3_3G019500/CsaV3_2G015790/CsaV3_7G000860/CsaV3_7G033390/CsaV3_1G013270/CsaV3_6G039660/CsaV3_4G000360/CsaV3_4G002310	csv:101213059/csv:101222468/csv:101212818/csv:101218382/csv:101205749/csv:101221248/csv:101210998/csv:101209418/csv:101212407/csv:101213892/csv:101221475/csv:101205119/csv:101204792/csv:101220201/csv:101217299/csv:101217907/csv:101212914/csv:101203846	18	6	CsaV3_6G038150/CsaV3_6G039670/CsaV3_7G000850/CsaV3_1G039030/CsaV3_6G039660/CsaV3_4G000360	12	CsaV3_5G003790/CsaV3_5G003800/CsaV3_6G028580/CsaV3_7G022600/CsaV3_4G033420/CsaV3_3G047470/CsaV3_3G019500/CsaV3_2G015790/CsaV3_7G000860/CsaV3_7G033390/CsaV3_1G013270/CsaV3_4G002310
csv00020	Citrate cycle (TCA cycle)	20/2230	49/4159	0.974492	0.999874	CsaV3_3G048280/CsaV3_6G000070/CsaV3_5G026370/CsaV3_6G047510/CsaV3_6G044640/CsaV3_7G031480/CsaV3_2G032870/CsaV3_3G015370/CsaV3_1G032330/CsaV3_7G028870/CsaV3_5G031990/CsaV3_6G015630/CsaV3_1G002350/CsaV3_5G034210/CsaV3_6G007490/CsaV3_3G027530/CsaV3_3G007460/CsaV3_4G005080/CsaV3_6G000060/CsaV3_6G008320	CsaV3_3G048280/CsaV3_6G000070/CsaV3_5G026370/CsaV3_6G047510/CsaV3_6G044640/CsaV3_7G031480/CsaV3_2G032870/CsaV3_3G015370/CsaV3_1G032330/CsaV3_7G028870/CsaV3_5G031990/CsaV3_6G015630/CsaV3_1G002350/CsaV3_5G034210/CsaV3_6G007490/CsaV3_3G027530/CsaV3_3G007460/CsaV3_4G005080/CsaV3_6G000060/CsaV3_6G008320	csv:101222382/csv:101207718/csv:101208883/csv:101217715/csv:101220209/csv:101220412/csv:101205566/csv:101222823/csv:101204247/csv:101214377/csv:101208773/csv:101209376/csv:101213903/csv:101220730/csv:101205496/csv:101220767/csv:101221189/csv:101211616/csv:101207718/csv:101215598	20	11	CsaV3_6G000070/CsaV3_3G015370/CsaV3_1G032330/CsaV3_7G028870/CsaV3_5G031990/CsaV3_5G034210/CsaV3_6G007490/CsaV3_3G007460/CsaV3_4G005080/CsaV3_6G000060/CsaV3_6G008320	9	CsaV3_3G048280/CsaV3_5G026370/CsaV3_6G047510/CsaV3_6G044640/CsaV3_7G031480/CsaV3_2G032870/CsaV3_6G015630/CsaV3_1G002350/CsaV3_3G027530
csv00562	Inositol phosphate metabolism	28/2230	66/4159	0.975075	0.999874	CsaV3_1G040000/CsaV3_3G036240/CsaV3_3G002010/CsaV3_3G048980/CsaV3_UNG190490/CsaV3_6G045630/CsaV3_5G036790/CsaV3_5G010430/CsaV3_5G023290/CsaV3_6G041580/CsaV3_1G017100/CsaV3_2G036570/CsaV3_2G036580/CsaV3_2G001660/CsaV3_3G001540/CsaV3_2G032910/CsaV3_2G012240/CsaV3_7G034100/CsaV3_1G043430/CsaV3_2G012250/CsaV3_4G028490/CsaV3_4G031770/CsaV3_6G016260/CsaV3_5G010130/CsaV3_1G036200/CsaV3_6G044860/CsaV3_5G…	CsaV3_1G040000/CsaV3_3G036240/CsaV3_3G002010/CsaV3_3G048980/CsaV3_UNG190490/CsaV3_6G045630/CsaV3_5G036790/CsaV3_5G010430/CsaV3_5G023290/CsaV3_6G041580/CsaV3_1G017100/CsaV3_2G036570/CsaV3_2G036580/CsaV3_2G001660/CsaV3_3G001540/CsaV3_2G032910/CsaV3_2G012240/CsaV3_7G034100/CsaV3_1G043430/CsaV3_2G012250/CsaV3_4G028490/CsaV3_4G031770/CsaV3_6G016260/CsaV3_5G010130/CsaV3_1G036200/CsaV3_6G044860/CsaV3_5G…	csv:101202978/csv:101203066/csv:101215556/csv:101211396/csv:101207441/csv:101211833/csv:101220755/csv:101205760/csv:101219958/csv:101204881/csv:101217972/csv:101218009/csv:101223134/csv:101221451/csv:101211366/csv:101204839/csv:101216505/csv:101213518/csv:101218054/csv:101221482/csv:101208830/csv:101218311/csv:101211426/csv:101212421/csv:101209542/csv:101207178/csv:101209319/csv:101214357	28	10	CsaV3_6G045630/CsaV3_5G036790/CsaV3_5G023290/CsaV3_6G041580/CsaV3_2G001660/CsaV3_2G012240/CsaV3_2G012250/CsaV3_4G028490/CsaV3_5G010130/CsaV3_2G028930	18	CsaV3_1G040000/CsaV3_3G036240/CsaV3_3G002010/CsaV3_3G048980/CsaV3_UNG190490/CsaV3_5G010430/CsaV3_1G017100/CsaV3_2G036570/CsaV3_2G036580/CsaV3_3G001540/CsaV3_2G032910/CsaV3_7G034100/CsaV3_1G043430/CsaV3_4G031770/CsaV3_6G016260/CsaV3_1G036200/CsaV3_6G044860/CsaV3_5G027710
csv00563	Glycosylphosphatidylinositol (GPI)-anchor biosynthesis	120683	18/4159	0.975927	0.999874	CsaV3_4G022060/CsaV3_6G045050/CsaV3_3G001560/CsaV3_5G027130/CsaV3_3G032650/CsaV3_3G000210	CsaV3_4G022060/CsaV3_6G045050/CsaV3_3G001560/CsaV3_5G027130/CsaV3_3G032650/CsaV3_3G000210	csv:101216602/csv:101208644/csv:101206318/csv:101221852/csv:101215904/csv:101204797	6	2	CsaV3_6G045050/CsaV3_3G032650	4	CsaV3_4G022060/CsaV3_3G001560/CsaV3_5G027130/CsaV3_3G000210
csv03040	Spliceosome	73/2230	158/4159	0.97641	0.999874	CsaV3_4G021980/CsaV3_UNG075590/CsaV3_2G003560/CsaV3_7G024760/CsaV3_1G045340/CsaV3_1G004710/CsaV3_5G027880/CsaV3_7G027360/CsaV3_5G026450/CsaV3_2G009170/CsaV3_6G052680/novel.554/CsaV3_2G002790/CsaV3_4G032850/CsaV3_4G037220/CsaV3_5G030120/CsaV3_4G009030/CsaV3_2G017010/CsaV3_2G011210/CsaV3_1G017170/CsaV3_6G040740/CsaV3_4G000860/CsaV3_5G006650/CsaV3_2G012590/CsaV3_UNG002030/CsaV3_2G006940/CsaV3_2G0087…	CsaV3_4G021980/CsaV3_UNG075590/CsaV3_2G003560/CsaV3_7G024760/CsaV3_1G045340/CsaV3_1G004710/CsaV3_5G027880/CsaV3_7G027360/CsaV3_5G026450/CsaV3_2G009170/CsaV3_6G052680/-/CsaV3_2G002790/CsaV3_4G032850/CsaV3_4G037220/CsaV3_5G030120/CsaV3_4G009030/CsaV3_2G017010/CsaV3_2G011210/CsaV3_1G017170/CsaV3_6G040740/CsaV3_4G000860/CsaV3_5G006650/CsaV3_2G012590/CsaV3_UNG002030/CsaV3_2G006940/CsaV3_2G008750/CsaV3…	csv:101219553/csv:101221493/csv:101210594/csv:101212307/csv:101205030/csv:101207648/csv:101221461/csv:101204563/csv:101210925/csv:101215564/csv:101207463/csv:101206265/csv:101222939/csv:101204969/csv:101222727/csv:101216854/csv:101205561/csv:101207116/csv:101210094/csv:101218920/csv:101214972/csv:101205303/csv:101203903/csv:101213128/csv:101205030/csv:101206387/csv:101203346/csv:101213308/csv:101…	73	48	CsaV3_4G021980/CsaV3_UNG075590/CsaV3_2G003560/CsaV3_1G045340/CsaV3_1G004710/CsaV3_5G027880/CsaV3_5G026450/CsaV3_6G052680/novel.554/CsaV3_2G002790/CsaV3_4G032850/CsaV3_4G037220/CsaV3_5G030120/CsaV3_4G009030/CsaV3_2G011210/CsaV3_1G017170/CsaV3_6G040740/CsaV3_4G000860/CsaV3_5G006650/CsaV3_2G012590/CsaV3_UNG002030/CsaV3_4G004840/CsaV3_1G045350/CsaV3_2G007640/CsaV3_2G033800/CsaV3_1G043080/CsaV3_1G0147…	25	CsaV3_7G024760/CsaV3_7G027360/CsaV3_2G009170/CsaV3_2G017010/CsaV3_2G006940/CsaV3_2G008750/CsaV3_3G004540/CsaV3_3G004310/CsaV3_1G033610/CsaV3_5G031610/CsaV3_4G001320/CsaV3_3G028790/CsaV3_1G014350/CsaV3_4G030890/CsaV3_7G028060/CsaV3_7G031760/CsaV3_5G031590/CsaV3_4G010150/CsaV3_6G017140/CsaV3_4G037710/CsaV3_5G006530/CsaV3_2G016150/CsaV3_1G007020/CsaV3_3G047170/CsaV3_3G020960
csv00513	Various types of N-glycan biosynthesis	120866	32/4159	0.978113	0.999874	CsaV3_5G032750/CsaV3_7G002510/CsaV3_6G049210/CsaV3_2G009420/CsaV3_4G008070/CsaV3_7G008560/CsaV3_7G029100/CsaV3_1G007480/CsaV3_3G001340/CsaV3_4G033140/CsaV3_2G014400/CsaV3_3G001520	CsaV3_5G032750/CsaV3_7G002510/CsaV3_6G049210/CsaV3_2G009420/CsaV3_4G008070/CsaV3_7G008560/CsaV3_7G029100/CsaV3_1G007480/CsaV3_3G001340/CsaV3_4G033140/CsaV3_2G014400/CsaV3_3G001520	csv:101218666/csv:101213679/csv:101215332/csv:101211792/csv:101211733/csv:101205170/csv:101211394/csv:101206027/csv:101204006/csv:101208085/csv:101209991/csv:101206800	12	2	CsaV3_5G032750/CsaV3_2G009420	10	CsaV3_7G002510/CsaV3_6G049210/CsaV3_4G008070/CsaV3_7G008560/CsaV3_7G029100/CsaV3_1G007480/CsaV3_3G001340/CsaV3_4G033140/CsaV3_2G014400/CsaV3_3G001520
csv03015	mRNA surveillance pathway	42/2230	96/4159	0.980446	0.999874	CsaV3_2G001320/CsaV3_4G025970/CsaV3_3G002080/CsaV3_3G009410/CsaV3_4G031880/CsaV3_3G012160/CsaV3_2G012690/CsaV3_1G043450/CsaV3_3G017220/CsaV3_4G004840/CsaV3_5G029980/CsaV3_1G033610/CsaV3_4G031180/CsaV3_1G006160/CsaV3_7G035250/CsaV3_5G024420/CsaV3_1G045580/CsaV3_5G037880/CsaV3_1G043080/CsaV3_1G037380/CsaV3_4G026290/CsaV3_7G007080/CsaV3_2G002500/CsaV3_2G030670/CsaV3_1G034540/CsaV3_4G010150/CsaV3_3G0…	CsaV3_2G001320/CsaV3_4G025970/CsaV3_3G002080/CsaV3_3G009410/CsaV3_4G031880/CsaV3_3G012160/CsaV3_2G012690/CsaV3_1G043450/CsaV3_3G017220/CsaV3_4G004840/CsaV3_5G029980/CsaV3_1G033610/CsaV3_4G031180/CsaV3_1G006160/CsaV3_7G035250/CsaV3_5G024420/CsaV3_1G045580/CsaV3_5G037880/CsaV3_1G043080/CsaV3_1G037380/CsaV3_4G026290/CsaV3_7G007080/CsaV3_2G002500/CsaV3_2G030670/CsaV3_1G034540/CsaV3_4G010150/CsaV3_3G0…	csv:101206856/csv:101209960/csv:101214107/csv:101209745/csv:101216970/csv:101209828/csv:101205600/csv:101220502/csv:101215673/csv:101213308/csv:101221902/csv:101221953/csv:101204474/csv:101206503/csv:101204291/csv:101211088/csv:101211261/csv:101211613/csv:101216950/csv:101215977/csv:101213136/csv:101204684/csv:101206275/csv:101205459/csv:101207842/csv:101207473/csv:101218026/csv:101217986/csv:101…	42	24	CsaV3_4G025970/CsaV3_3G002080/CsaV3_3G009410/CsaV3_4G031880/CsaV3_2G012690/CsaV3_3G017220/CsaV3_4G004840/CsaV3_5G029980/CsaV3_1G006160/CsaV3_5G024420/CsaV3_5G037880/CsaV3_1G043080/CsaV3_4G026290/CsaV3_7G007080/CsaV3_1G034540/CsaV3_3G007250/CsaV3_4G031660/CsaV3_2G014290/CsaV3_5G024750/CsaV3_2G006670/CsaV3_6G007620/CsaV3_4G035290/CsaV3_6G004880/CsaV3_2G012530	18	CsaV3_2G001320/CsaV3_3G012160/CsaV3_1G043450/CsaV3_1G033610/CsaV3_4G031180/CsaV3_7G035250/CsaV3_1G045580/CsaV3_1G037380/CsaV3_2G002500/CsaV3_2G030670/CsaV3_4G010150/CsaV3_6G017140/CsaV3_2G010350/CsaV3_3G022660/CsaV3_3G036850/CsaV3_6G036040/CsaV3_3G020960/CsaV3_3G018370
csv03050	Proteasome	19/2230	48/4159	0.982454	0.999874	CsaV3_3G000720/CsaV3_3G028620/CsaV3_2G029040/CsaV3_6G031560/CsaV3_2G011480/CsaV3_2G029050/CsaV3_2G007490/CsaV3_4G034160/CsaV3_7G025230/CsaV3_4G032560/CsaV3_2G031230/CsaV3_4G025590/CsaV3_3G009670/CsaV3_7G003090/CsaV3_2G009110/CsaV3_4G006830/CsaV3_7G034340/CsaV3_2G008010/CsaV3_6G032330	CsaV3_3G000720/CsaV3_3G028620/CsaV3_2G029040/CsaV3_6G031560/CsaV3_2G011480/CsaV3_2G029050/CsaV3_2G007490/CsaV3_4G034160/CsaV3_7G025230/CsaV3_4G032560/CsaV3_2G031230/CsaV3_4G025590/CsaV3_3G009670/CsaV3_7G003090/CsaV3_2G009110/CsaV3_4G006830/CsaV3_7G034340/CsaV3_2G008010/CsaV3_6G032330	csv:101217295/csv:101206724/csv:101212516/csv:101214977/csv:101213742/csv:101212754/csv:101220370/csv:101212471/csv:101206991/csv:101221238/csv:101208696/csv:101216188/csv:101213159/csv:101206940/csv:101216279/csv:101207684/csv:101206046/csv:101209885/csv:101205512	19	12	CsaV3_3G000720/CsaV3_2G029040/CsaV3_6G031560/CsaV3_2G011480/CsaV3_2G029050/CsaV3_4G032560/CsaV3_2G031230/CsaV3_3G009670/CsaV3_7G003090/CsaV3_4G006830/CsaV3_7G034340/CsaV3_6G032330	7	CsaV3_3G028620/CsaV3_2G007490/CsaV3_4G034160/CsaV3_7G025230/CsaV3_4G025590/CsaV3_2G009110/CsaV3_2G008010
csv00940	Phenylpropanoid biosynthesis	60/2230	134/4159	0.985066	0.999874	CsaV3_3G022670/CsaV3_4G023590/CsaV3_1G009470/CsaV3_5G001380/CsaV3_3G047080/CsaV3_7G008380/CsaV3_6G039670/CsaV3_6G043930/CsaV3_1G036000/CsaV3_2G018010/CsaV3_3G030410/CsaV3_1G012650/CsaV3_3G035690/CsaV3_3G044560/CsaV3_2G035150/CsaV3_2G014160/CsaV3_7G031620/CsaV3_1G037100/CsaV3_5G037450/CsaV3_3G043060/CsaV3_4G023640/CsaV3_3G032830/CsaV3_1G007040/CsaV3_6G002170/CsaV3_5G030330/CsaV3_6G047430/CsaV3_3G0…	CsaV3_3G022670/CsaV3_4G023590/CsaV3_1G009470/CsaV3_5G001380/CsaV3_3G047080/CsaV3_7G008380/CsaV3_6G039670/CsaV3_6G043930/CsaV3_1G036000/CsaV3_2G018010/CsaV3_3G030410/CsaV3_1G012650/CsaV3_3G035690/CsaV3_3G044560/CsaV3_2G035150/CsaV3_2G014160/CsaV3_7G031620/CsaV3_1G037100/CsaV3_5G037450/CsaV3_3G043060/CsaV3_4G023640/CsaV3_3G032830/CsaV3_1G007040/CsaV3_6G002170/CsaV3_5G030330/CsaV3_6G047430/CsaV3_3G0…	csv:101217315/csv:101212957/csv:101211791/csv:101211438/csv:101218982/csv:101202984/csv:101218382/csv:101206860/csv:101214999/csv:101206562/csv:101219578/csv:101216263/csv:101215428/csv:101215384/csv:101213629/csv:101209504/csv:101218121/csv:101214057/csv:105435603/csv:101223112/csv:101211989/csv:101218838/csv:101218046/csv:101218447/csv:101212121/csv:101217954/csv:101218838/csv:101203261/csv:101…	60	26	CsaV3_3G047080/CsaV3_6G039670/CsaV3_2G018010/CsaV3_1G012650/CsaV3_2G035150/CsaV3_7G031620/CsaV3_6G002170/CsaV3_6G047430/CsaV3_3G015450/CsaV3_1G037110/CsaV3_1G010780/CsaV3_7G031910/CsaV3_1G026620/CsaV3_4G023660/CsaV3_3G039990/CsaV3_1G010960/CsaV3_1G004550/CsaV3_3G026650/CsaV3_2G036090/CsaV3_5G030200/CsaV3_2G010460/CsaV3_6G032510/CsaV3_6G039660/CsaV3_4G036360/CsaV3_7G006200/CsaV3_7G008590	34	CsaV3_3G022670/CsaV3_4G023590/CsaV3_1G009470/CsaV3_5G001380/CsaV3_7G008380/CsaV3_6G043930/CsaV3_1G036000/CsaV3_3G030410/CsaV3_3G035690/CsaV3_3G044560/CsaV3_2G014160/CsaV3_1G037100/CsaV3_5G037450/CsaV3_3G043060/CsaV3_4G023640/CsaV3_3G032830/CsaV3_1G007040/CsaV3_5G030330/CsaV3_3G032850/CsaV3_1G031500/CsaV3_4G005430/CsaV3_1G030610/CsaV3_3G004020/CsaV3_1G013520/CsaV3_4G029960/CsaV3_7G008400/CsaV3_2G0…
csv00062	Fatty acid elongation	120713	22/4159	0.988842	0.999874	CsaV3_2G028690/CsaV3_5G034300/CsaV3_1G033910/CsaV3_3G043140/CsaV3_4G024940/CsaV3_3G008950/CsaV3_5G026640	CsaV3_2G028690/CsaV3_5G034300/CsaV3_1G033910/CsaV3_3G043140/CsaV3_4G024940/CsaV3_3G008950/CsaV3_5G026640	csv:101217470/csv:101218433/csv:101209161/csv:101221849/csv:101213758/csv:101222848/csv:101213758	7	2	CsaV3_5G034300/CsaV3_3G043140	5	CsaV3_2G028690/CsaV3_1G033910/CsaV3_4G024940/CsaV3_3G008950/CsaV3_5G026640
csv04070	Phosphatidylinositol signaling system	22/2230	56/4159	0.989305	0.999874	CsaV3_2G013830/CsaV3_3G036240/CsaV3_3G048980/CsaV3_5G036790/CsaV3_4G027680/CsaV3_5G023290/CsaV3_6G041580/CsaV3_1G017100/CsaV3_2G036570/CsaV3_2G036580/CsaV3_3G001540/CsaV3_2G032910/CsaV3_1G041870/CsaV3_4G028490/CsaV3_5G010130/CsaV3_6G012360/CsaV3_1G036200/CsaV3_2G008260/CsaV3_3G005860/CsaV3_6G009150/CsaV3_5G037850/CsaV3_2G028930	CsaV3_2G013830/CsaV3_3G036240/CsaV3_3G048980/CsaV3_5G036790/CsaV3_4G027680/CsaV3_5G023290/CsaV3_6G041580/CsaV3_1G017100/CsaV3_2G036570/CsaV3_2G036580/CsaV3_3G001540/CsaV3_2G032910/CsaV3_1G041870/CsaV3_4G028490/CsaV3_5G010130/CsaV3_6G012360/CsaV3_1G036200/CsaV3_2G008260/CsaV3_3G005860/CsaV3_6G009150/CsaV3_5G037850/CsaV3_2G028930	csv:101218625/csv:101203066/csv:101211396/csv:101220755/csv:101205905/csv:101219958/csv:101204881/csv:101217972/csv:101218009/csv:101223134/csv:101211366/csv:101204839/csv:101203816/csv:101208830/csv:101212421/csv:101210099/csv:101209542/csv:101217776/csv:101208743/csv:101204532/csv:101210866/csv:101214357	22	8	CsaV3_5G036790/CsaV3_4G027680/CsaV3_5G023290/CsaV3_6G041580/CsaV3_4G028490/CsaV3_5G010130/CsaV3_6G009150/CsaV3_2G028930	14	CsaV3_2G013830/CsaV3_3G036240/CsaV3_3G048980/CsaV3_1G017100/CsaV3_2G036570/CsaV3_2G036580/CsaV3_3G001540/CsaV3_2G032910/CsaV3_1G041870/CsaV3_6G012360/CsaV3_1G036200/CsaV3_2G008260/CsaV3_3G005860/CsaV3_5G037850
csv03020	RNA polymerase	15/2230	41/4159	0.990858	0.999874	CsaV3_3G000490/novel.326/CsaV3_3G017180/CsaV3_6G048110/CsaV3_3G043380/CsaV3_2G010370/CsaV3_1G013120/CsaV3_1G012790/CsaV3_3G019080/CsaV3_5G039120/CsaV3_UNG208340/CsaV3_UNG207810/CsaV3_3G040420/CsaV3_UNG208330/CsaV3_1G040840	CsaV3_3G000490/-/CsaV3_3G017180/CsaV3_6G048110/CsaV3_3G043380/CsaV3_2G010370/CsaV3_1G013120/CsaV3_1G012790/CsaV3_3G019080/CsaV3_5G039120/CsaV3_UNG208340/CsaV3_UNG207810/CsaV3_3G040420/CsaV3_UNG208330/CsaV3_1G040840	csv:101220606/csv:101211228/csv:101211588/csv:101213971/csv:101207169/csv:101218763/csv:101216823/csv:101214828/csv:3429301/csv:101213105/csv:3429302/csv:3429304/csv:101222454/csv:3429302/csv:101209454	15	14	CsaV3_3G000490/novel.326/CsaV3_3G017180/CsaV3_6G048110/CsaV3_2G010370/CsaV3_1G013120/CsaV3_1G012790/CsaV3_3G019080/CsaV3_5G039120/CsaV3_UNG208340/CsaV3_UNG207810/CsaV3_3G040420/CsaV3_UNG208330/CsaV3_1G040840	1	CsaV3_3G043380
csv00510	N-Glycan biosynthesis	15/2230	42/4159	0.993798	0.999874	CsaV3_5G027050/CsaV3_7G002510/CsaV3_6G049210/CsaV3_1G013400/CsaV3_4G027630/CsaV3_4G008070/CsaV3_7G029100/CsaV3_1G007480/CsaV3_4G023360/CsaV3_3G001340/CsaV3_4G033140/CsaV3_5G030370/CsaV3_2G014400/CsaV3_3G001520/CsaV3_5G008030	CsaV3_5G027050/CsaV3_7G002510/CsaV3_6G049210/CsaV3_1G013400/CsaV3_4G027630/CsaV3_4G008070/CsaV3_7G029100/CsaV3_1G007480/CsaV3_4G023360/CsaV3_3G001340/CsaV3_4G033140/CsaV3_5G030370/CsaV3_2G014400/CsaV3_3G001520/CsaV3_5G008030	csv:101220682/csv:101213679/csv:101215332/csv:101218949/csv:101203321/csv:101211733/csv:101211394/csv:101206027/csv:101216959/csv:101204006/csv:101208085/csv:101210818/csv:101209991/csv:101206800/csv:101220849	15	1	CsaV3_5G027050	14	CsaV3_7G002510/CsaV3_6G049210/CsaV3_1G013400/CsaV3_4G027630/CsaV3_4G008070/CsaV3_7G029100/CsaV3_1G007480/CsaV3_4G023360/CsaV3_3G001340/CsaV3_4G033140/CsaV3_5G030370/CsaV3_2G014400/CsaV3_3G001520/CsaV3_5G008030
csv00190	Oxidative phosphorylation	60/2230	141/4159	0.997144	0.999874	CsaV3_2G008520/CsaV3_4G024730/CsaV3_1G002100/CsaV3_5G028650/CsaV3_5G037860/CsaV3_1G037430/CsaV3_3G010400/CsaV3_3G035760/CsaV3_3G039600/CsaV3_2G031740/CsaV3_UNG209980/CsaV3_4G001330/CsaV3_1G031730/CsaV3_6G046410/CsaV3_1G040420/CsaV3_1G005960/CsaV3_4G027390/CsaV3_3G026760/CsaV3_2G031420/CsaV3_UNG208120/CsaV3_3G010470/CsaV3_3G037270/CsaV3_7G007250/CsaV3_UNG208980/CsaV3_1G028620/CsaV3_1G015770/CsaV3_…	CsaV3_2G008520/CsaV3_4G024730/CsaV3_1G002100/CsaV3_5G028650/CsaV3_5G037860/CsaV3_1G037430/CsaV3_3G010400/CsaV3_3G035760/CsaV3_3G039600/CsaV3_2G031740/CsaV3_UNG209980/CsaV3_4G001330/CsaV3_1G031730/CsaV3_6G046410/CsaV3_1G040420/CsaV3_1G005960/CsaV3_4G027390/CsaV3_3G026760/CsaV3_2G031420/CsaV3_UNG208120/CsaV3_3G010470/CsaV3_3G037270/CsaV3_7G007250/CsaV3_UNG208980/CsaV3_1G028620/CsaV3_1G015770/CsaV3_…	csv:101221564/csv:101217432/csv:101217264/csv:101205618/csv:101211115/csv:101212532/csv:101205400/csv:101216393/csv:101211235/csv:101221052/csv:11123919/csv:101218811/csv:101221783/csv:101222890/csv:101208426/csv:101222697/csv:101209202/csv:101217221/csv:101213505/csv:11123895/csv:101206104/csv:101205294/csv:101207157/csv:3429253/csv:101214655/csv:101216072/csv:101209815/csv:101217923/csv:1012098…	60	35	CsaV3_5G028650/CsaV3_5G037860/CsaV3_1G037430/CsaV3_3G010400/CsaV3_3G039600/CsaV3_UNG209980/CsaV3_4G001330/CsaV3_6G046410/CsaV3_1G005960/CsaV3_4G027390/CsaV3_2G031420/CsaV3_UNG208120/CsaV3_3G010470/CsaV3_7G007250/CsaV3_UNG208980/CsaV3_1G028620/CsaV3_1G015770/CsaV3_4G001900/CsaV3_UNG208130/CsaV3_3G017590/CsaV3_UNG209220/CsaV3_UNG203700/CsaV3_UNG209120/CsaV3_6G007320/CsaV3_4G000760/CsaV3_2G029850/Cs…	25	CsaV3_2G008520/CsaV3_4G024730/CsaV3_1G002100/CsaV3_3G035760/CsaV3_2G031740/CsaV3_1G031730/CsaV3_1G040420/CsaV3_3G026760/CsaV3_3G037270/CsaV3_4G004740/CsaV3_2G029210/CsaV3_7G001210/CsaV3_7G000200/CsaV3_2G029320/CsaV3_3G006320/CsaV3_3G006950/CsaV3_UNG216460/CsaV3_2G015290/CsaV3_3G046570/CsaV3_3G027530/CsaV3_6G021470/CsaV3_3G010990/CsaV3_7G033710/CsaV3_3G005120/CsaV3_2G029310
csv04136	Autophagy - other	120775	30/4159	0.99753	0.999874	CsaV3_6G009210/CsaV3_3G034550/CsaV3_5G037660/CsaV3_4G031180/CsaV3_2G034910/CsaV3_1G000860/CsaV3_6G036040/CsaV3_3G018530/CsaV3_7G026720	CsaV3_6G009210/CsaV3_3G034550/CsaV3_5G037660/CsaV3_4G031180/CsaV3_2G034910/CsaV3_1G000860/CsaV3_6G036040/CsaV3_3G018530/CsaV3_7G026720	csv:101204045/csv:101221608/csv:101208902/csv:101204474/csv:101217161/csv:101219308/csv:101210127/csv:101223109/csv:101213064	9	2	CsaV3_3G018530/CsaV3_7G026720	7	CsaV3_6G009210/CsaV3_3G034550/CsaV3_5G037660/CsaV3_4G031180/CsaV3_2G034910/CsaV3_1G000860/CsaV3_6G036040
csv03018	RNA degradation	33/2230	93/4159	0.999874	0.999874	CsaV3_1G041580/CsaV3_6G048080/CsaV3_3G005680/CsaV3_5G006110/CsaV3_2G012300/CsaV3_1G015760/CsaV3_UNG224740/CsaV3_4G011700/CsaV3_6G040390/CsaV3_1G039980/CsaV3_1G042970/CsaV3_6G014010/CsaV3_7G026750/CsaV3_2G009040/CsaV3_3G023460/CsaV3_2G016650/CsaV3_3G043330/CsaV3_4G007530/CsaV3_3G028790/CsaV3_4G030890/CsaV3_4G012090/CsaV3_4G008960/CsaV3_5G035010/CsaV3_3G040620/CsaV3_2G030910/CsaV3_7G034290/CsaV3_7G…	CsaV3_1G041580/CsaV3_6G048080/CsaV3_3G005680/CsaV3_5G006110/CsaV3_2G012300/CsaV3_1G015760/CsaV3_UNG224740/CsaV3_4G011700/CsaV3_6G040390/CsaV3_1G039980/CsaV3_1G042970/CsaV3_6G014010/CsaV3_7G026750/CsaV3_2G009040/CsaV3_3G023460/CsaV3_2G016650/CsaV3_3G043330/CsaV3_4G007530/CsaV3_3G028790/CsaV3_4G030890/CsaV3_4G012090/CsaV3_4G008960/CsaV3_5G035010/CsaV3_3G040620/CsaV3_2G030910/CsaV3_7G034290/CsaV3_7G…	csv:101217516/csv:101211230/csv:101208933/csv:101205035/csv:101210207/csv:101215594/csv:101221637/csv:101214102/csv:101208322/csv:101202739/csv:101215027/csv:101217447/csv:101212096/csv:101205306/csv:101220704/csv:101213384/csv:101206210/csv:101221870/csv:101208670/csv:101203991/csv:101222028/csv:101219465/csv:101206588/csv:101205015/csv:101205616/csv:101207244/csv:101205556/csv:101219081/csv:101…	33	20	CsaV3_1G041580/CsaV3_3G005680/CsaV3_5G006110/CsaV3_2G012300/CsaV3_UNG224740/CsaV3_1G042970/CsaV3_6G014010/CsaV3_2G016650/CsaV3_3G043330/CsaV3_4G007530/CsaV3_4G012090/CsaV3_5G035010/CsaV3_3G040620/CsaV3_7G034290/CsaV3_7G031130/CsaV3_6G004880/CsaV3_1G035960/CsaV3_4G012080/CsaV3_3G032260/CsaV3_4G012070	13	CsaV3_6G048080/CsaV3_1G015760/CsaV3_4G011700/CsaV3_6G040390/CsaV3_1G039980/CsaV3_7G026750/CsaV3_2G009040/CsaV3_3G023460/CsaV3_3G028790/CsaV3_4G030890/CsaV3_4G008960/CsaV3_2G030910/CsaV3_3G018370

## Sheet: XS_20vsCS_20DAP KEGG
KEGGID	Description	GeneRatio	BgRatio	pvalue	padj	geneID	geneName	keggID	Count	Up	Up_Gene_names	Down	Down_Gene_names
csv00196	Photosynthesis - antenna proteins	15/964	20/4203	1.10655e-06	0.00012504	CsaV3_1G032510/CsaV3_6G051520/CsaV3_5G025740/CsaV3_1G002410/CsaV3_6G005340/CsaV3_1G043710/CsaV3_3G005950/CsaV3_3G031580/CsaV3_6G013800/CsaV3_5G030270/CsaV3_2G027790/CsaV3_5G039350/CsaV3_7G002620/CsaV3_1G005600/CsaV3_4G026100	CsaV3_1G032510/CsaV3_6G051520/CsaV3_5G025740/CsaV3_1G002410/CsaV3_6G005340/CsaV3_1G043710/CsaV3_3G005950/CsaV3_3G031580/CsaV3_6G013800/CsaV3_5G030270/CsaV3_2G027790/CsaV3_5G039350/CsaV3_7G002620/CsaV3_1G005600/CsaV3_4G026100	csv:101211276/csv:101221671/csv:101211428/csv:101222701/csv:101204705/csv:101202993/csv:101207278/csv:101203342/csv:101213845/csv:101214055/csv:101219846/csv:101218137/csv:101212963/csv:101218675/csv:101208740	15	14	CsaV3_1G032510/CsaV3_6G051520/CsaV3_5G025740/CsaV3_1G002410/CsaV3_6G005340/CsaV3_1G043710/CsaV3_3G005950/CsaV3_3G031580/CsaV3_6G013800/CsaV3_5G030270/CsaV3_5G039350/CsaV3_7G002620/CsaV3_1G005600/CsaV3_4G026100	1	CsaV3_2G027790
csv00940	Phenylpropanoid biosynthesis	52/964	143/4203	0.000153004	0.0086447	CsaV3_3G043060/CsaV3_1G007040/CsaV3_1G031500/CsaV3_3G004020/CsaV3_4G004610/CsaV3_UNG223560/CsaV3_2G009070/CsaV3_3G047080/CsaV3_3G015450/CsaV3_2G018010/CsaV3_1G036000/CsaV3_4G023590/CsaV3_4G008590/CsaV3_UNG186450/CsaV3_4G002320/CsaV3_3G032830/CsaV3_7G005720/CsaV3_3G030410/CsaV3_4G002290/CsaV3_UNG126970/CsaV3_4G002310/CsaV3_7G008400/CsaV3_5G035070/CsaV3_4G023660/CsaV3_5G030330/CsaV3_6G014060/CsaV3_…	CsaV3_3G043060/CsaV3_1G007040/CsaV3_1G031500/CsaV3_3G004020/CsaV3_4G004610/CsaV3_UNG223560/CsaV3_2G009070/CsaV3_3G047080/CsaV3_3G015450/CsaV3_2G018010/CsaV3_1G036000/CsaV3_4G023590/CsaV3_4G008590/CsaV3_UNG186450/CsaV3_4G002320/CsaV3_3G032830/CsaV3_7G005720/CsaV3_3G030410/CsaV3_4G002290/CsaV3_UNG126970/CsaV3_4G002310/CsaV3_7G008400/CsaV3_5G035070/CsaV3_4G023660/CsaV3_5G030330/CsaV3_6G014060/CsaV3_…	csv:101223112/csv:101218046/csv:101218077/csv:101205290/csv:101211442/csv:101211442/csv:101205537/csv:101218982/csv:101203261/csv:101206562/csv:101214999/csv:101212957/csv:101204109/csv:101208174/csv:101203846/csv:101218838/csv:101208932/csv:101219578/csv:101203846/csv:101211442/csv:101203846/csv:101218441/csv:101209588/csv:101211507/csv:101212121/csv:101218156/csv:101203846/csv:101220587/csv:101…	52	18	CsaV3_1G031500/CsaV3_4G004610/CsaV3_UNG223560/CsaV3_3G047080/CsaV3_3G015450/CsaV3_2G018010/CsaV3_4G008590/CsaV3_UNG186450/CsaV3_UNG126970/CsaV3_6G014060/CsaV3_4G033920/CsaV3_UNG160170/CsaV3_UNG174360/CsaV3_6G039660/CsaV3_2G036090/CsaV3_1G037110/CsaV3_7G031910/CsaV3_7G008590	34	CsaV3_3G043060/CsaV3_1G007040/CsaV3_3G004020/CsaV3_2G009070/CsaV3_1G036000/CsaV3_4G023590/CsaV3_4G002320/CsaV3_3G032830/CsaV3_7G005720/CsaV3_3G030410/CsaV3_4G002290/CsaV3_4G002310/CsaV3_7G008400/CsaV3_5G035070/CsaV3_4G023660/CsaV3_5G030330/CsaV3_4G002330/CsaV3_3G035690/CsaV3_7G008420/CsaV3_6G043930/CsaV3_3G032850/CsaV3_6G019040/CsaV3_3G004010/CsaV3_6G039690/CsaV3_6G019010/CsaV3_6G039680/CsaV3_2G0…
csv00511	Other glycan degradation	9/964	16/4203	0.00397539	0.0954316	CsaV3_5G039980/CsaV3_5G024900/CsaV3_2G011410/CsaV3_3G018140/CsaV3_5G036760/CsaV3_5G010500/CsaV3_5G001420/CsaV3_3G032600/CsaV3_6G047280	CsaV3_5G039980/CsaV3_5G024900/CsaV3_2G011410/CsaV3_3G018140/CsaV3_5G036760/CsaV3_5G010500/CsaV3_5G001420/CsaV3_3G032600/CsaV3_6G047280	csv:101204709/csv:101222242/csv:101213022/csv:101204534/csv:101217833/csv:101203831/csv:101211186/csv:101211123/csv:101221354	9	3	CsaV3_2G011410/CsaV3_5G036760/CsaV3_5G010500	6	CsaV3_5G039980/CsaV3_5G024900/CsaV3_3G018140/CsaV3_5G001420/CsaV3_3G032600/CsaV3_6G047280
csv00908	Zeatin biosynthesis	11/964	22/4203	0.00489869	0.0954316	CsaV3_4G028960/CsaV3_4G028910/CsaV3_3G036360/CsaV3_5G006200/CsaV3_1G040500/CsaV3_4G036030/CsaV3_4G008350/CsaV3_1G040510/CsaV3_6G003310/CsaV3_2G029070/CsaV3_5G039210	CsaV3_4G028960/CsaV3_4G028910/CsaV3_3G036360/CsaV3_5G006200/CsaV3_1G040500/CsaV3_4G036030/CsaV3_4G008350/CsaV3_1G040510/CsaV3_6G003310/CsaV3_2G029070/CsaV3_5G039210	csv:101210219/csv:101210715/csv:101218917/csv:101205347/csv:101222481/csv:101217899/csv:101207319/csv:101207014/csv:101209073/csv:101212272/csv:101215037	11	4	CsaV3_4G028960/CsaV3_4G028910/CsaV3_3G036360/CsaV3_2G029070	7	CsaV3_5G006200/CsaV3_1G040500/CsaV3_4G036030/CsaV3_4G008350/CsaV3_1G040510/CsaV3_6G003310/CsaV3_5G039210
csv00480	Glutathione metabolism	28/964	77/4203	0.00497428	0.0954316	CsaV3_6G045790/CsaV3_3G015450/CsaV3_1G039210/CsaV3_4G025770/CsaV3_4G025690/CsaV3_6G000030/CsaV3_4G025760/CsaV3_1G008370/CsaV3_4G025650/CsaV3_7G029040/CsaV3_3G011460/CsaV3_1G001620/CsaV3_7G029060/CsaV3_1G004150/CsaV3_1G005420/CsaV3_3G035350/CsaV3_4G007720/CsaV3_4G006000/CsaV3_4G007700/CsaV3_2G031240/CsaV3_4G025680/CsaV3_1G005440/CsaV3_3G027630/CsaV3_2G032090/CsaV3_3G011470/CsaV3_2G007500/CsaV3_7G0…	CsaV3_6G045790/CsaV3_3G015450/CsaV3_1G039210/CsaV3_4G025770/CsaV3_4G025690/CsaV3_6G000030/CsaV3_4G025760/CsaV3_1G008370/CsaV3_4G025650/CsaV3_7G029040/CsaV3_3G011460/CsaV3_1G001620/CsaV3_7G029060/CsaV3_1G004150/CsaV3_1G005420/CsaV3_3G035350/CsaV3_4G007720/CsaV3_4G006000/CsaV3_4G007700/CsaV3_2G031240/CsaV3_4G025680/CsaV3_1G005440/CsaV3_3G027630/CsaV3_2G032090/CsaV3_3G011470/CsaV3_2G007500/CsaV3_7G0…	csv:101214973/csv:101203261/csv:101211392/csv:101214992/csv:105435246/csv:101208623/csv:101213782/csv:101221659/csv:101220464/csv:101212771/csv:101207634/csv:101210007/csv:101212291/csv:101217418/csv:101218987/csv:101211241/csv:101218083/csv:101211608/csv:101217848/csv:101208455/csv:101214992/csv:101203519/csv:101222416/csv:101216396/csv:101207882/csv:101215538/csv:101212536/csv:101213073	28	6	CsaV3_3G015450/CsaV3_1G039210/CsaV3_6G000030/CsaV3_1G008370/CsaV3_7G029060/CsaV3_7G029050	22	CsaV3_6G045790/CsaV3_4G025770/CsaV3_4G025690/CsaV3_4G025760/CsaV3_4G025650/CsaV3_7G029040/CsaV3_3G011460/CsaV3_1G001620/CsaV3_1G004150/CsaV3_1G005420/CsaV3_3G035350/CsaV3_4G007720/CsaV3_4G006000/CsaV3_4G007700/CsaV3_2G031240/CsaV3_4G025680/CsaV3_1G005440/CsaV3_3G027630/CsaV3_2G032090/CsaV3_3G011470/CsaV3_2G007500/CsaV3_4G003180
csv00073	Cutin, suberine and wax biosynthesis	12/964	25/4203	0.00506717	0.0954316	CsaV3_6G006560/CsaV3_2G009920/CsaV3_3G031760/CsaV3_1G030900/CsaV3_5G037050/CsaV3_1G036060/CsaV3_7G034800/CsaV3_3G010310/CsaV3_3G010300/CsaV3_3G010290/CsaV3_6G004090/CsaV3_3G043880	CsaV3_6G006560/CsaV3_2G009920/CsaV3_3G031760/CsaV3_1G030900/CsaV3_5G037050/CsaV3_1G036060/CsaV3_7G034800/CsaV3_3G010310/CsaV3_3G010300/CsaV3_3G010290/CsaV3_6G004090/CsaV3_3G043880	csv:101222843/csv:101205541/csv:101222831/csv:101212905/csv:101213829/csv:101214516/csv:101209117/csv:101203691/csv:101203441/csv:101221193/csv:101206763/csv:101205454	12	7	CsaV3_6G006560/CsaV3_5G037050/CsaV3_7G034800/CsaV3_3G010310/CsaV3_3G010300/CsaV3_6G004090/CsaV3_3G043880	5	CsaV3_2G009920/CsaV3_3G031760/CsaV3_1G030900/CsaV3_1G036060/CsaV3_3G010290
csv00460	Cyanoamino acid metabolism	16/964	40/4203	0.0114162	0.147988	CsaV3_3G043060/CsaV3_1G007040/CsaV3_2G008170/CsaV3_6G045790/CsaV3_6G000650/CsaV3_1G036000/CsaV3_UNG186450/CsaV3_1G039010/CsaV3_5G035070/CsaV3_4G033920/novel.202/CsaV3_4G028640/CsaV3_3G019180/CsaV3_6G043980/CsaV3_4G034720/CsaV3_2G010460	CsaV3_3G043060/CsaV3_1G007040/CsaV3_2G008170/CsaV3_6G045790/CsaV3_6G000650/CsaV3_1G036000/CsaV3_UNG186450/CsaV3_1G039010/CsaV3_5G035070/CsaV3_4G033920/-/CsaV3_4G028640/CsaV3_3G019180/CsaV3_6G043980/CsaV3_4G034720/CsaV3_2G010460	csv:101223112/csv:101218046/csv:101213549/csv:101214973/csv:101220896/csv:101214999/csv:101208174/csv:101208927/csv:101209588/csv:101220587/csv:101210312/csv:101215287/csv:101211272/csv:101206142/csv:101218064/csv:101220742	16	4	CsaV3_6G000650/CsaV3_UNG186450/CsaV3_4G033920/CsaV3_3G019180	12	CsaV3_3G043060/CsaV3_1G007040/CsaV3_2G008170/CsaV3_6G045790/CsaV3_1G036000/CsaV3_1G039010/CsaV3_5G035070/novel.202/CsaV3_4G028640/CsaV3_6G043980/CsaV3_4G034720/CsaV3_2G010460
csv00910	Nitrogen metabolism	14/964	34/4203	0.0132002	0.147988	CsaV3_3G037320/CsaV3_5G031570/CsaV3_6G039990/CsaV3_3G018610/CsaV3_5G023360/CsaV3_4G014780/CsaV3_3G044050/CsaV3_6G043980/CsaV3_3G013840/CsaV3_4G028560/CsaV3_2G026780/CsaV3_3G027930/CsaV3_2G026770/CsaV3_3G042440	CsaV3_3G037320/CsaV3_5G031570/CsaV3_6G039990/CsaV3_3G018610/CsaV3_5G023360/CsaV3_4G014780/CsaV3_3G044050/CsaV3_6G043980/CsaV3_3G013840/CsaV3_4G028560/CsaV3_2G026780/CsaV3_3G027930/CsaV3_2G026770/CsaV3_3G042440	csv:101209642/csv:101215090/csv:101202774/csv:101217505/csv:101219000/csv:101214659/csv:101207765/csv:101206142/csv:101212441/csv:101216001/csv:101219000/csv:101213224/csv:101219000/csv:101213998	14	2	CsaV3_3G044050/CsaV3_3G042440	12	CsaV3_3G037320/CsaV3_5G031570/CsaV3_6G039990/CsaV3_3G018610/CsaV3_5G023360/CsaV3_4G014780/CsaV3_6G043980/CsaV3_3G013840/CsaV3_4G028560/CsaV3_2G026780/CsaV3_3G027930/CsaV3_2G026770
csv00360	Phenylalanine metabolism	17/964	44/4203	0.0136249	0.147988	CsaV3_6G028580/CsaV3_4G002320/CsaV3_4G002290/CsaV3_4G002310/CsaV3_7G022600/CsaV3_6G014060/CsaV3_4G002330/CsaV3_1G039020/CsaV3_5G003790/CsaV3_6G039690/CsaV3_6G039680/CsaV3_1G031900/CsaV3_1G001170/CsaV3_6G039660/CsaV3_6G039710/CsaV3_7G000850/CsaV3_6G039700	CsaV3_6G028580/CsaV3_4G002320/CsaV3_4G002290/CsaV3_4G002310/CsaV3_7G022600/CsaV3_6G014060/CsaV3_4G002330/CsaV3_1G039020/CsaV3_5G003790/CsaV3_6G039690/CsaV3_6G039680/CsaV3_1G031900/CsaV3_1G001170/CsaV3_6G039660/CsaV3_6G039710/CsaV3_7G000850/CsaV3_6G039700	csv:101221248/csv:101203846/csv:101203846/csv:101203846/csv:101210998/csv:101218156/csv:101203846/csv:101209171/csv:101213059/csv:101218617/csv:101218382/csv:101203411/csv:101204200/csv:101217907/csv:101218617/csv:101205749/csv:101222092	17	4	CsaV3_6G028580/CsaV3_6G014060/CsaV3_1G039020/CsaV3_6G039660	13	CsaV3_4G002320/CsaV3_4G002290/CsaV3_4G002310/CsaV3_7G022600/CsaV3_4G002330/CsaV3_5G003790/CsaV3_6G039690/CsaV3_6G039680/CsaV3_1G031900/CsaV3_1G001170/CsaV3_6G039710/CsaV3_7G000850/CsaV3_6G039700
csv04075	Plant hormone signal transduction	64/964	218/4203	0.0143705	0.147988	CsaV3_5G024480/CsaV3_6G043720/CsaV3_2G027990/CsaV3_1G014770/CsaV3_6G013600/CsaV3_3G012390/CsaV3_4G030060/CsaV3_7G027600/CsaV3_2G004130/CsaV3_5G008910/CsaV3_4G037140/CsaV3_3G045690/CsaV3_5G031940/CsaV3_1G045520/CsaV3_3G018080/CsaV3_4G026530/CsaV3_6G015010/CsaV3_6G007970/CsaV3_1G031470/CsaV3_3G007730/CsaV3_6G050480/CsaV3_7G022810/CsaV3_3G030830/CsaV3_4G030260/CsaV3_6G043710/CsaV3_2G026630/CsaV3_6G0…	CsaV3_5G024480/CsaV3_6G043720/CsaV3_2G027990/CsaV3_1G014770/CsaV3_6G013600/CsaV3_3G012390/CsaV3_4G030060/CsaV3_7G027600/CsaV3_2G004130/CsaV3_5G008910/CsaV3_4G037140/CsaV3_3G045690/CsaV3_5G031940/CsaV3_1G045520/CsaV3_3G018080/CsaV3_4G026530/CsaV3_6G015010/CsaV3_6G007970/CsaV3_1G031470/CsaV3_3G007730/CsaV3_6G050480/CsaV3_7G022810/CsaV3_3G030830/CsaV3_4G030260/CsaV3_6G043710/CsaV3_2G026630/CsaV3_6G0…	csv:101210839/csv:101211093/csv:105435299/csv:101204604/csv:101219677/csv:101213967/csv:101209540/csv:101218948/csv:101223028/csv:101209478/csv:101216425/csv:101216825/csv:101209506/csv:101212477/csv:101203475/csv:101216106/csv:101203423/csv:101219164/csv:101209219/csv:101204264/csv:101220018/csv:101213583/csv:101204473/csv:101214088/csv:101214967/csv:101223043/csv:101221152/csv:101212154/csv:101…	64	33	CsaV3_6G043720/CsaV3_2G027990/CsaV3_1G014770/CsaV3_3G012390/CsaV3_7G027600/CsaV3_2G004130/CsaV3_5G008910/CsaV3_4G037140/CsaV3_1G045520/CsaV3_6G007970/CsaV3_1G031470/CsaV3_3G007730/CsaV3_6G050480/CsaV3_2G026630/CsaV3_6G044680/CsaV3_3G033450/CsaV3_2G004120/CsaV3_6G030790/CsaV3_6G015280/CsaV3_5G001910/CsaV3_2G009260/CsaV3_2G015600/CsaV3_4G036720/CsaV3_6G032130/CsaV3_2G007980/CsaV3_7G029600/CsaV3_3G0…	31	CsaV3_5G024480/CsaV3_6G013600/CsaV3_4G030060/CsaV3_3G045690/CsaV3_5G031940/CsaV3_3G018080/CsaV3_4G026530/CsaV3_6G015010/CsaV3_7G022810/CsaV3_3G030830/CsaV3_4G030260/CsaV3_6G043710/CsaV3_1G041270/CsaV3_3G001710/CsaV3_5G009010/CsaV3_5G010560/CsaV3_7G028420/CsaV3_3G008270/CsaV3_7G034270/CsaV3_4G016020/CsaV3_3G023380/CsaV3_4G030100/CsaV3_3G022370/CsaV3_4G026200/CsaV3_1G007260/CsaV3_7G008310/CsaV3_1G0…
csv00195	Photosynthesis	19/964	51/4203	0.0144059	0.147988	CsaV3_6G042680/CsaV3_3G019220/CsaV3_3G013420/CsaV3_3G046150/CsaV3_6G052210/CsaV3_1G046680/CsaV3_3G004330/CsaV3_1G015100/CsaV3_6G041600/CsaV3_4G007600/CsaV3_4G007520/CsaV3_2G009680/CsaV3_2G010090/CsaV3_1G011330/CsaV3_3G019210/CsaV3_7G027520/CsaV3_3G025000/CsaV3_3G005120/CsaV3_2G032160	CsaV3_6G042680/CsaV3_3G019220/CsaV3_3G013420/CsaV3_3G046150/CsaV3_6G052210/CsaV3_1G046680/CsaV3_3G004330/CsaV3_1G015100/CsaV3_6G041600/CsaV3_4G007600/CsaV3_4G007520/CsaV3_2G009680/CsaV3_2G010090/CsaV3_1G011330/CsaV3_3G019210/CsaV3_7G027520/CsaV3_3G025000/CsaV3_3G005120/CsaV3_2G032160	csv:101203080/csv:101204479/csv:101207214/csv:101211484/csv:101209832/csv:101215480/csv:101218641/csv:101209111/csv:101204396/csv:101215781/csv:101214094/csv:101208674/csv:101203850/csv:101209135/csv:101204727/csv:101218005/csv:101223219/csv:101214682/csv:101215909	19	18	CsaV3_6G042680/CsaV3_3G019220/CsaV3_3G013420/CsaV3_3G046150/CsaV3_6G052210/CsaV3_1G046680/CsaV3_3G004330/CsaV3_1G015100/CsaV3_6G041600/CsaV3_4G007600/CsaV3_4G007520/CsaV3_2G009680/CsaV3_2G010090/CsaV3_1G011330/CsaV3_3G019210/CsaV3_7G027520/CsaV3_3G025000/CsaV3_2G032160	1	CsaV3_3G005120
csv04626	Plant-pathogen interaction	44/964	143/4203	0.017316	0.163059	CsaV3_6G039330/CsaV3_3G005930/CsaV3_5G038390/CsaV3_4G002860/CsaV3_7G026140/CsaV3_2G034220/CsaV3_7G003380/CsaV3_3G015240/CsaV3_6G049070/CsaV3_6G051540/CsaV3_3G010840/CsaV3_3G032970/novel.399/CsaV3_3G028090/CsaV3_3G021210/CsaV3_1G033530/CsaV3_5G028580/CsaV3_1G004290/CsaV3_3G012800/CsaV3_3G042240/CsaV3_3G012730/CsaV3_2G013830/CsaV3_3G028050/CsaV3_5G037010/CsaV3_4G011890/CsaV3_3G005100/CsaV3_7G008650…	CsaV3_6G039330/CsaV3_3G005930/CsaV3_5G038390/CsaV3_4G002860/CsaV3_7G026140/CsaV3_2G034220/CsaV3_7G003380/CsaV3_3G015240/CsaV3_6G049070/CsaV3_6G051540/CsaV3_3G010840/CsaV3_3G032970/-/CsaV3_3G028090/CsaV3_3G021210/CsaV3_1G033530/CsaV3_5G028580/CsaV3_1G004290/CsaV3_3G012800/CsaV3_3G042240/CsaV3_3G012730/CsaV3_2G013830/CsaV3_3G028050/CsaV3_5G037010/CsaV3_4G011890/CsaV3_3G005100/CsaV3_7G008650/CsaV3_3…	csv:101212721/csv:101207531/csv:101203560/csv:101220633/csv:101221990/csv:101209761/csv:101203576/csv:101212685/csv:101218270/csv:101215973/csv:101211635/csv:101220738/csv:101206736/csv:101214911/csv:101218237/csv:101202796/csv:101215631/csv:101220025/csv:101220878/csv:101216651/csv:101219531/csv:101218625/csv:101214428/csv:101214558/csv:101208990/csv:101215161/csv:101219869/csv:101214670/csv:101…	44	8	CsaV3_6G039330/CsaV3_3G005930/CsaV3_5G038390/CsaV3_7G008650/CsaV3_7G000190/CsaV3_4G036210/CsaV3_4G027870/CsaV3_3G038320	36	CsaV3_4G002860/CsaV3_7G026140/CsaV3_2G034220/CsaV3_7G003380/CsaV3_3G015240/CsaV3_6G049070/CsaV3_6G051540/CsaV3_3G010840/CsaV3_3G032970/novel.399/CsaV3_3G028090/CsaV3_3G021210/CsaV3_1G033530/CsaV3_5G028580/CsaV3_1G004290/CsaV3_3G012800/CsaV3_3G042240/CsaV3_3G012730/CsaV3_2G013830/CsaV3_3G028050/CsaV3_5G037010/CsaV3_4G011890/CsaV3_3G005100/CsaV3_3G028070/CsaV3_6G047100/CsaV3_3G033720/CsaV3_1G014860…
csv00514	Other types of O-glycan biosynthesis	6/964	841459	0.0226529	0.196906	CsaV3_3G027570/CsaV3_4G027890/CsaV3_6G038980/CsaV3_2G032270/CsaV3_6G035870/CsaV3_7G023280	CsaV3_3G027570/CsaV3_4G027890/CsaV3_6G038980/CsaV3_2G032270/CsaV3_6G035870/CsaV3_7G023280	csv:101221472/csv:101203732/csv:101207236/csv:101214063/csv:101220530/csv:101214097	6	0		6	CsaV3_3G027570/CsaV3_4G027890/CsaV3_6G038980/CsaV3_2G032270/CsaV3_6G035870/CsaV3_7G023280
csv00561	Glycerolipid metabolism	22/964	65/4203	0.0286466	0.231219	CsaV3_3G033310/CsaV3_3G015560/CsaV3_5G034650/CsaV3_3G034040/CsaV3_4G024550/CsaV3_7G034580/CsaV3_4G025340/CsaV3_4G025310/CsaV3_5G023050/CsaV3_7G023230/CsaV3_1G010300/CsaV3_5G029180/CsaV3_3G048840/CsaV3_4G025300/CsaV3_4G000810/CsaV3_7G032960/CsaV3_2G030770/CsaV3_2G033910/CsaV3_5G034660/CsaV3_3G034100/CsaV3_5G006640/CsaV3_6G012360	CsaV3_3G033310/CsaV3_3G015560/CsaV3_5G034650/CsaV3_3G034040/CsaV3_4G024550/CsaV3_7G034580/CsaV3_4G025340/CsaV3_4G025310/CsaV3_5G023050/CsaV3_7G023230/CsaV3_1G010300/CsaV3_5G029180/CsaV3_3G048840/CsaV3_4G025300/CsaV3_4G000810/CsaV3_7G032960/CsaV3_2G030770/CsaV3_2G033910/CsaV3_5G034660/CsaV3_3G034100/CsaV3_5G006640/CsaV3_6G012360	csv:101204929/csv:101205287/csv:101216053/csv:101214865/csv:101210022/csv:101222563/csv:101209692/csv:101210436/csv:101222469/csv:101216983/csv:101208763/csv:101212167/csv:101213494/csv:101210436/csv:101214595/csv:101222060/csv:101218489/csv:101213816/csv:101215334/csv:101214624/csv:101204152/csv:101210099	22	10	CsaV3_3G033310/CsaV3_3G034040/CsaV3_7G034580/CsaV3_4G025340/CsaV3_1G010300/CsaV3_3G048840/CsaV3_4G025300/CsaV3_7G032960/CsaV3_2G030770/CsaV3_3G034100	12	CsaV3_3G015560/CsaV3_5G034650/CsaV3_4G024550/CsaV3_4G025310/CsaV3_5G023050/CsaV3_7G023230/CsaV3_5G029180/CsaV3_4G000810/CsaV3_2G033910/CsaV3_5G034660/CsaV3_5G006640/CsaV3_6G012360
csv00630	Glyoxylate and dicarboxylate metabolism	22/964	66/4203	0.0339773	0.255962	CsaV3_6G048160/CsaV3_3G042420/CsaV3_6G028390/CsaV3_6G000070/CsaV3_3G007460/CsaV3_4G028640/CsaV3_3G015070/CsaV3_3G019180/CsaV3_5G031200/CsaV3_7G032960/CsaV3_5G002930/CsaV3_6G051820/CsaV3_5G031220/CsaV3_6G043980/CsaV3_3G020130/CsaV3_3G013840/CsaV3_6G039090/CsaV3_5G021900/CsaV3_2G035120/CsaV3_3G030860/CsaV3_1G010620/CsaV3_3G009440	CsaV3_6G048160/CsaV3_3G042420/CsaV3_6G028390/CsaV3_6G000070/CsaV3_3G007460/CsaV3_4G028640/CsaV3_3G015070/CsaV3_3G019180/CsaV3_5G031200/CsaV3_7G032960/CsaV3_5G002930/CsaV3_6G051820/CsaV3_5G031220/CsaV3_6G043980/CsaV3_3G020130/CsaV3_3G013840/CsaV3_6G039090/CsaV3_5G021900/CsaV3_2G035120/CsaV3_3G030860/CsaV3_1G010620/CsaV3_3G009440	csv:101210494/csv:101213516/csv:101214377/csv:101207718/csv:101221189/csv:101215287/csv:101209903/csv:101211272/csv:101213570/csv:101222060/csv:101220920/csv:101215498/csv:101220645/csv:101206142/csv:101203579/csv:101212441/csv:101207975/csv:101222352/csv:101214114/csv:101214327/csv:101209820/csv:101209989	22	13	CsaV3_6G048160/CsaV3_3G042420/CsaV3_6G000070/CsaV3_3G007460/CsaV3_3G019180/CsaV3_5G031200/CsaV3_7G032960/CsaV3_5G002930/CsaV3_6G051820/CsaV3_5G031220/CsaV3_6G039090/CsaV3_5G021900/CsaV3_1G010620	9	CsaV3_6G028390/CsaV3_4G028640/CsaV3_3G015070/CsaV3_6G043980/CsaV3_3G020130/CsaV3_3G013840/CsaV3_2G035120/CsaV3_3G030860/CsaV3_3G009440
csv00600	Sphingolipid metabolism	9/964	22/4203	0.0455418	0.321639	CsaV3_3G010870/CsaV3_5G039980/CsaV3_1G012180/CsaV3_2G011410/CsaV3_6G008140/CsaV3_5G029180/CsaV3_2G026490/CsaV3_5G036760/CsaV3_6G048550	CsaV3_3G010870/CsaV3_5G039980/CsaV3_1G012180/CsaV3_2G011410/CsaV3_6G008140/CsaV3_5G029180/CsaV3_2G026490/CsaV3_5G036760/CsaV3_6G048550	csv:101212358/csv:101204709/csv:101207762/csv:101213022/csv:101217975/csv:101212167/csv:101204467/csv:101217833/csv:101205550	9	2	CsaV3_2G011410/CsaV3_5G036760	7	CsaV3_3G010870/CsaV3_5G039980/CsaV3_1G012180/CsaV3_6G008140/CsaV3_5G029180/CsaV3_2G026490/CsaV3_6G048550
csv00500	Starch and sucrose metabolism	35/964	120/4203	0.0648752	0.423545	CsaV3_3G043060/CsaV3_1G007040/CsaV3_2G001890/CsaV3_6G006740/CsaV3_4G000970/CsaV3_1G046750/CsaV3_1G005170/CsaV3_1G043670/CsaV3_1G036000/CsaV3_2G011150/CsaV3_UNG186450/CsaV3_7G029570/CsaV3_6G031530/CsaV3_3G036980/CsaV3_5G035080/CsaV3_5G003970/CsaV3_3G006840/CsaV3_5G035070/CsaV3_3G016150/CsaV3_4G033920/CsaV3_5G003450/CsaV3_7G002310/CsaV3_2G015270/CsaV3_7G034730/CsaV3_3G045370/CsaV3_7G003840/CsaV3_5G…	CsaV3_3G043060/CsaV3_1G007040/CsaV3_2G001890/CsaV3_6G006740/CsaV3_4G000970/CsaV3_1G046750/CsaV3_1G005170/CsaV3_1G043670/CsaV3_1G036000/CsaV3_2G011150/CsaV3_UNG186450/CsaV3_7G029570/CsaV3_6G031530/CsaV3_3G036980/CsaV3_5G035080/CsaV3_5G003970/CsaV3_3G006840/CsaV3_5G035070/CsaV3_3G016150/CsaV3_4G033920/CsaV3_5G003450/CsaV3_7G002310/CsaV3_2G015270/CsaV3_7G034730/CsaV3_3G045370/CsaV3_7G003840/CsaV3_5G…	csv:101223112/csv:101218046/csv:101218300/csv:101213366/csv:101203847/csv:101216685/csv:101216865/csv:101223026/csv:101214999/csv:101208942/csv:101208174/csv:101204921/csv:101215687/csv:101210586/csv:101205644/csv:101215227/csv:101213564/csv:101209588/csv:101212172/csv:101220587/csv:101208090/csv:101216573/csv:101206719/csv:101220437/csv:101221562/csv:101222005/csv:101221746/csv:101208605/csv:101…	35	16	CsaV3_2G001890/CsaV3_4G000970/CsaV3_1G005170/CsaV3_2G011150/CsaV3_UNG186450/CsaV3_6G031530/CsaV3_3G036980/CsaV3_5G035080/CsaV3_5G003970/CsaV3_4G033920/CsaV3_7G002310/CsaV3_3G045370/CsaV3_2G001900/CsaV3_5G028300/CsaV3_2G001510/CsaV3_5G001560	19	CsaV3_3G043060/CsaV3_1G007040/CsaV3_6G006740/CsaV3_1G046750/CsaV3_1G043670/CsaV3_1G036000/CsaV3_7G029570/CsaV3_3G006840/CsaV3_5G035070/CsaV3_3G016150/CsaV3_5G003450/CsaV3_2G015270/CsaV3_7G034730/CsaV3_7G003840/CsaV3_5G033210/CsaV3_3G013570/CsaV3_6G039140/CsaV3_7G021990/CsaV3_2G010460
csv00400	Phenylalanine, tyrosine and tryptophan biosynthesis	14/964	41/4203	0.0674673	0.423545	CsaV3_3G043270/CsaV3_6G045310/CsaV3_2G003300/CsaV3_2G017780/CsaV3_6G021500/CsaV3_4G031290/CsaV3_1G014510/CsaV3_6G042420/CsaV3_2G034880/CsaV3_6G001800/CsaV3_1G010970/CsaV3_6G042130/CsaV3_1G008610/CsaV3_3G009780	CsaV3_3G043270/CsaV3_6G045310/CsaV3_2G003300/CsaV3_2G017780/CsaV3_6G021500/CsaV3_4G031290/CsaV3_1G014510/CsaV3_6G042420/CsaV3_2G034880/CsaV3_6G001800/CsaV3_1G010970/CsaV3_6G042130/CsaV3_1G008610/CsaV3_3G009780	csv:101222321/csv:101207177/csv:101214147/csv:101213380/csv:101217934/csv:101203740/csv:101222151/csv:101204463/csv:101217625/csv:101217107/csv:101208895/csv:101209860/csv:101204330/csv:101215568	14	5	CsaV3_3G043270/CsaV3_2G003300/CsaV3_6G021500/CsaV3_2G034880/CsaV3_6G001800	9	CsaV3_6G045310/CsaV3_2G017780/CsaV3_4G031290/CsaV3_1G014510/CsaV3_6G042420/CsaV3_1G010970/CsaV3_6G042130/CsaV3_1G008610/CsaV3_3G009780
csv00071	Fatty acid degradation	16/964	50/4203	0.0894406	0.525575	CsaV3_6G031750/CsaV3_6G028580/CsaV3_5G002040/CsaV3_6G031760/CsaV3_6G023960/CsaV3_5G026420/CsaV3_1G036060/CsaV3_3G013480/CsaV3_7G024950/CsaV3_4G028240/CsaV3_6G025240/CsaV3_6G024070/CsaV3_4G006560/CsaV3_UNG218460/CsaV3_UNG144110/CsaV3_6G024060	CsaV3_6G031750/CsaV3_6G028580/CsaV3_5G002040/CsaV3_6G031760/CsaV3_6G023960/CsaV3_5G026420/CsaV3_1G036060/CsaV3_3G013480/CsaV3_7G024950/CsaV3_4G028240/CsaV3_6G025240/CsaV3_6G024070/CsaV3_4G006560/CsaV3_UNG218460/CsaV3_UNG144110/CsaV3_6G024060	csv:101212881/csv:101221248/csv:101209130/csv:101211996/csv:101218899/csv:101209864/csv:101214516/csv:101207461/csv:101209854/csv:101218462/csv:101218899/csv:101218899/csv:101202800/csv:101218159/csv:101218159/csv:101218899	16	10	CsaV3_6G028580/CsaV3_6G031760/CsaV3_6G023960/CsaV3_3G013480/CsaV3_4G028240/CsaV3_6G025240/CsaV3_6G024070/CsaV3_4G006560/CsaV3_UNG144110/CsaV3_6G024060	6	CsaV3_6G031750/CsaV3_5G002040/CsaV3_5G026420/CsaV3_1G036060/CsaV3_7G024950/CsaV3_UNG218460
csv00250	Alanine, aspartate and glutamate metabolism	17/964	54/4203	0.0930222	0.525575	CsaV3_4G035950/CsaV3_4G026970/CsaV3_1G039010/CsaV3_4G032320/CsaV3_3G004920/CsaV3_4G007380/CsaV3_5G031200/CsaV3_3G044050/CsaV3_5G031220/CsaV3_1G000670/CsaV3_3G013840/CsaV3_4G034720/CsaV3_6G039090/CsaV3_3G027930/CsaV3_2G010560/CsaV3_4G007370/CsaV3_3G031010	CsaV3_4G035950/CsaV3_4G026970/CsaV3_1G039010/CsaV3_4G032320/CsaV3_3G004920/CsaV3_4G007380/CsaV3_5G031200/CsaV3_3G044050/CsaV3_5G031220/CsaV3_1G000670/CsaV3_3G013840/CsaV3_4G034720/CsaV3_6G039090/CsaV3_3G027930/CsaV3_2G010560/CsaV3_4G007370/CsaV3_3G031010	csv:101213917/csv:101210304/csv:101208927/csv:101219660/csv:101220705/csv:101220932/csv:101213570/csv:101207765/csv:101220645/csv:101215982/csv:101212441/csv:101218064/csv:101207975/csv:101213224/csv:101222628/csv:101211530/csv:101207254	17	8	CsaV3_4G026970/CsaV3_3G004920/CsaV3_5G031200/CsaV3_3G044050/CsaV3_5G031220/CsaV3_1G000670/CsaV3_6G039090/CsaV3_3G031010	9	CsaV3_4G035950/CsaV3_1G039010/CsaV3_4G032320/CsaV3_4G007380/CsaV3_3G013840/CsaV3_4G034720/CsaV3_3G027930/CsaV3_2G010560/CsaV3_4G007370
csv00260	Glycine, serine and threonine metabolism	21/964	70/4203	0.103528	0.55708	CsaV3_3G043270/CsaV3_4G026970/CsaV3_2G017260/CsaV3_1G002920/CsaV3_7G022600/CsaV3_2G001290/CsaV3_3G031190/CsaV3_6G000070/CsaV3_5G003790/CsaV3_UNG227840/CsaV3_4G028640/CsaV3_3G019180/CsaV3_5G031200/CsaV3_1G010970/CsaV3_1G001170/CsaV3_7G032960/CsaV3_5G031220/CsaV3_6G039090/CsaV3_6G045610/CsaV3_1G010620/CsaV3_3G009440	CsaV3_3G043270/CsaV3_4G026970/CsaV3_2G017260/CsaV3_1G002920/CsaV3_7G022600/CsaV3_2G001290/CsaV3_3G031190/CsaV3_6G000070/CsaV3_5G003790/CsaV3_UNG227840/CsaV3_4G028640/CsaV3_3G019180/CsaV3_5G031200/CsaV3_1G010970/CsaV3_1G001170/CsaV3_7G032960/CsaV3_5G031220/CsaV3_6G039090/CsaV3_6G045610/CsaV3_1G010620/CsaV3_3G009440	csv:101222321/csv:101210304/csv:101209304/csv:101208305/csv:101210998/csv:101208070/csv:101219910/csv:101207718/csv:101213059/csv:101219910/csv:101215287/csv:101211272/csv:101213570/csv:101208895/csv:101204200/csv:101222060/csv:101220645/csv:101207975/csv:101211596/csv:101209820/csv:101209989	21	12	CsaV3_3G043270/CsaV3_4G026970/CsaV3_2G017260/CsaV3_1G002920/CsaV3_6G000070/CsaV3_3G019180/CsaV3_5G031200/CsaV3_7G032960/CsaV3_5G031220/CsaV3_6G039090/CsaV3_6G045610/CsaV3_1G010620	9	CsaV3_7G022600/CsaV3_2G001290/CsaV3_3G031190/CsaV3_5G003790/CsaV3_UNG227840/CsaV3_4G028640/CsaV3_1G010970/CsaV3_1G001170/CsaV3_3G009440
csv00052	Galactose metabolism	15/964	48/4203	0.116046	0.589442	CsaV3_4G033560/CsaV3_2G001890/CsaV3_1G046750/CsaV3_1G015730/CsaV3_5G003970/CsaV3_7G034730/CsaV3_6G048080/CsaV3_5G029180/CsaV3_5G036760/CsaV3_3G023460/CsaV3_2G001900/CsaV3_1G008720/CsaV3_5G028300/CsaV3_6G039140/CsaV3_4G011820	CsaV3_4G033560/CsaV3_2G001890/CsaV3_1G046750/CsaV3_1G015730/CsaV3_5G003970/CsaV3_7G034730/CsaV3_6G048080/CsaV3_5G029180/CsaV3_5G036760/CsaV3_3G023460/CsaV3_2G001900/CsaV3_1G008720/CsaV3_5G028300/CsaV3_6G039140/CsaV3_4G011820	csv:101214893/csv:101218300/csv:101216685/csv:101215109/csv:101215227/csv:101220437/csv:101211230/csv:101212167/csv:101217833/csv:101220704/csv:101218300/csv:101204256/csv:101218883/csv:101208701/csv:101211538	15	8	CsaV3_2G001890/CsaV3_1G015730/CsaV3_5G003970/CsaV3_5G036760/CsaV3_2G001900/CsaV3_1G008720/CsaV3_5G028300/CsaV3_4G011820	7	CsaV3_4G033560/CsaV3_1G046750/CsaV3_7G034730/CsaV3_6G048080/CsaV3_5G029180/CsaV3_3G023460/CsaV3_6G039140
csv00941	Flavonoid biosynthesis	7/964	19/4203	0.1229	0.589442	CsaV3_2G009070/CsaV3_3G027830/CsaV3_5G030330/CsaV3_5G010920/CsaV3_2G025200/CsaV3_6G003560/CsaV3_7G008590	CsaV3_2G009070/CsaV3_3G027830/CsaV3_5G030330/CsaV3_5G010920/CsaV3_2G025200/CsaV3_6G003560/CsaV3_7G008590	csv:101205537/csv:101205211/csv:101212121/csv:101218716/csv:101207100/csv:101219245/csv:101205648	7	4	CsaV3_3G027830/CsaV3_5G010920/CsaV3_6G003560/CsaV3_7G008590	3	CsaV3_2G009070/CsaV3_5G030330/CsaV3_2G025200
csv00592	alpha-Linolenic acid metabolism	18/964	60/4203	0.125191	0.589442	CsaV3_5G023060/CsaV3_7G034390/CsaV3_6G023960/CsaV3_7G027160/CsaV3_4G037110/CsaV3_4G023920/CsaV3_2G033050/CsaV3_4G037360/CsaV3_7G024950/CsaV3_7G006680/CsaV3_6G025240/CsaV3_6G024070/CsaV3_4G023810/CsaV3_UNG218460/CsaV3_UNG144110/CsaV3_4G023820/CsaV3_1G004200/CsaV3_6G024060	CsaV3_5G023060/CsaV3_7G034390/CsaV3_6G023960/CsaV3_7G027160/CsaV3_4G037110/CsaV3_4G023920/CsaV3_2G033050/CsaV3_4G037360/CsaV3_7G024950/CsaV3_7G006680/CsaV3_6G025240/CsaV3_6G024070/CsaV3_4G023810/CsaV3_UNG218460/CsaV3_UNG144110/CsaV3_4G023820/CsaV3_1G004200/CsaV3_6G024060	csv:101222233/csv:101204952/csv:101218899/csv:101222906/csv:101221396/csv:101214639/csv:101203714/csv:101218180/csv:101209854/csv:101218180/csv:101218899/csv:101218899/csv:101216566/csv:101218159/csv:101218159/csv:101216318/csv:101218599/csv:101218899	18	7	CsaV3_6G023960/CsaV3_7G006680/CsaV3_6G025240/CsaV3_6G024070/CsaV3_4G023810/CsaV3_UNG144110/CsaV3_6G024060	11	CsaV3_5G023060/CsaV3_7G034390/CsaV3_7G027160/CsaV3_4G037110/CsaV3_4G023920/CsaV3_2G033050/CsaV3_4G037360/CsaV3_7G024950/CsaV3_UNG218460/CsaV3_4G023820/CsaV3_1G004200
csv00770	Pantothenate and CoA biosynthesis	8/964	23/4203	0.135407	0.594682	CsaV3_6G003860/CsaV3_5G035390/CsaV3_6G038890/CsaV3_5G014210/CsaV3_6G035700/CsaV3_5G031530/CsaV3_2G001510/CsaV3_2G025820	CsaV3_6G003860/CsaV3_5G035390/CsaV3_6G038890/CsaV3_5G014210/CsaV3_6G035700/CsaV3_5G031530/CsaV3_2G001510/CsaV3_2G025820	csv:101203236/csv:101204676/csv:101204944/csv:101212902/csv:101214416/csv:101216215/csv:101204456/csv:101214004	8	2	CsaV3_5G014210/CsaV3_2G001510	6	CsaV3_6G003860/CsaV3_5G035390/CsaV3_6G038890/CsaV3_6G035700/CsaV3_5G031530/CsaV3_2G025820
csv04146	Peroxisome	21/964	73/4203	0.146058	0.594682	CsaV3_2G004490/CsaV3_5G002040/CsaV3_1G046740/CsaV3_6G014400/CsaV3_2G005140/CsaV3_3G039850/CsaV3_5G013260/CsaV3_2G009880/CsaV3_3G013480/CsaV3_6G051820/CsaV3_4G028240/CsaV3_1G033470/CsaV3_1G004130/CsaV3_6G039090/CsaV3_6G038810/CsaV3_7G004280/CsaV3_4G006560/CsaV3_UNG218460/CsaV3_3G030860/CsaV3_UNG144110/CsaV3_1G046130	CsaV3_2G004490/CsaV3_5G002040/CsaV3_1G046740/CsaV3_6G014400/CsaV3_2G005140/CsaV3_3G039850/CsaV3_5G013260/CsaV3_2G009880/CsaV3_3G013480/CsaV3_6G051820/CsaV3_4G028240/CsaV3_1G033470/CsaV3_1G004130/CsaV3_6G039090/CsaV3_6G038810/CsaV3_7G004280/CsaV3_4G006560/CsaV3_UNG218460/CsaV3_3G030860/CsaV3_UNG144110/CsaV3_1G046130	csv:101216556/csv:101209130/csv:101216440/csv:101221780/csv:101211331/csv:101215097/csv:101218922/csv:101206004/csv:101207461/csv:101215498/csv:101218462/csv:101207364/csv:101216945/csv:101207975/csv:101203798/csv:101214701/csv:101202800/csv:101218159/csv:101214327/csv:101218159/csv:101205111	21	11	CsaV3_6G014400/CsaV3_5G013260/CsaV3_3G013480/CsaV3_6G051820/CsaV3_4G028240/CsaV3_1G033470/CsaV3_6G039090/CsaV3_6G038810/CsaV3_4G006560/CsaV3_UNG144110/CsaV3_1G046130	10	CsaV3_2G004490/CsaV3_5G002040/CsaV3_1G046740/CsaV3_2G005140/CsaV3_3G039850/CsaV3_2G009880/CsaV3_1G004130/CsaV3_7G004280/CsaV3_UNG218460/CsaV3_3G030860
csv04016	MAPK signaling pathway - plant	34/964	125/4203	0.148652	0.594682	CsaV3_7G026460/CsaV3_3G012390/CsaV3_4G030060/CsaV3_6G047760/CsaV3_3G015240/CsaV3_6G051540/CsaV3_4G026530/CsaV3_6G004660/CsaV3_4G006090/CsaV3_7G003490/CsaV3_1G009350/CsaV3_4G030260/CsaV3_1G033530/CsaV3_2G034810/CsaV3_3G001710/CsaV3_5G010560/CsaV3_2G016430/CsaV3_3G033450/CsaV3_2G013830/CsaV3_2G009260/CsaV3_6G000890/CsaV3_2G001350/CsaV3_4G030100/CsaV3_3G022370/CsaV3_6G032130/CsaV3_1G034580/CsaV3_3G0…	CsaV3_7G026460/CsaV3_3G012390/CsaV3_4G030060/CsaV3_6G047760/CsaV3_3G015240/CsaV3_6G051540/CsaV3_4G026530/CsaV3_6G004660/CsaV3_4G006090/CsaV3_7G003490/CsaV3_1G009350/CsaV3_4G030260/CsaV3_1G033530/CsaV3_2G034810/CsaV3_3G001710/CsaV3_5G010560/CsaV3_2G016430/CsaV3_3G033450/CsaV3_2G013830/CsaV3_2G009260/CsaV3_6G000890/CsaV3_2G001350/CsaV3_4G030100/CsaV3_3G022370/CsaV3_6G032130/CsaV3_1G034580/CsaV3_3G0…	csv:101223223/csv:101213967/csv:101209540/csv:101216853/csv:101212685/csv:101215973/csv:101216106/csv:101215276/csv:101212728/csv:101205351/csv:101212831/csv:101214088/csv:101202796/csv:101208274/csv:101205372/csv:101219833/csv:101214276/csv:101206842/csv:101218625/csv:101213479/csv:101211475/csv:101206374/csv:101210281/csv:101220325/csv:101207918/csv:101206871/csv:101209614/csv:101205786/csv:101…	34	8	CsaV3_3G012390/CsaV3_1G009350/CsaV3_2G016430/CsaV3_3G033450/CsaV3_2G009260/CsaV3_6G032130/CsaV3_7G029600/CsaV3_2G002930	26	CsaV3_7G026460/CsaV3_4G030060/CsaV3_6G047760/CsaV3_3G015240/CsaV3_6G051540/CsaV3_4G026530/CsaV3_6G004660/CsaV3_4G006090/CsaV3_7G003490/CsaV3_4G030260/CsaV3_1G033530/CsaV3_2G034810/CsaV3_3G001710/CsaV3_5G010560/CsaV3_2G013830/CsaV3_6G000890/CsaV3_2G001350/CsaV3_4G030100/CsaV3_3G022370/CsaV3_1G034580/CsaV3_3G043480/CsaV3_6G000830/CsaV3_6G047750/CsaV3_4G035560/CsaV3_3G008610/CsaV3_5G002910
csv00270	Cysteine and methionine metabolism	28/964	101/4203	0.149717	0.594682	CsaV3_3G020550/CsaV3_1G039210/CsaV3_6G000650/CsaV3_4G026970/CsaV3_6G039940/CsaV3_3G020560/CsaV3_4G006090/CsaV3_6G028390/CsaV3_1G008370/CsaV3_3G040500/CsaV3_6G037780/CsaV3_3G031190/CsaV3_3G007460/CsaV3_1G001620/CsaV3_UNG227840/CsaV3_3G000880/CsaV3_3G041150/CsaV3_5G001660/CsaV3_7G027790/CsaV3_1G041720/CsaV3_3G001160/CsaV3_6G000890/CsaV3_2G025850/CsaV3_3G010720/CsaV3_7G000760/CsaV3_1G039690/CsaV3_2G…	CsaV3_3G020550/CsaV3_1G039210/CsaV3_6G000650/CsaV3_4G026970/CsaV3_6G039940/CsaV3_3G020560/CsaV3_4G006090/CsaV3_6G028390/CsaV3_1G008370/CsaV3_3G040500/CsaV3_6G037780/CsaV3_3G031190/CsaV3_3G007460/CsaV3_1G001620/CsaV3_UNG227840/CsaV3_3G000880/CsaV3_3G041150/CsaV3_5G001660/CsaV3_7G027790/CsaV3_1G041720/CsaV3_3G001160/CsaV3_6G000890/CsaV3_2G025850/CsaV3_3G010720/CsaV3_7G000760/CsaV3_1G039690/CsaV3_2G…	csv:101207514/csv:101211392/csv:101220896/csv:101210304/csv:101222328/csv:101207514/csv:101212728/csv:101214377/csv:101221659/csv:101203129/csv:101209525/csv:101219910/csv:101221189/csv:101210007/csv:101219910/csv:101214172/csv:101212851/csv:101207013/csv:101221323/csv:101218702/csv:101207925/csv:101211475/csv:101213522/csv:101209658/csv:101204791/csv:101218750/csv:101214004/csv:101213467	28	14	CsaV3_3G020550/CsaV3_1G039210/CsaV3_6G000650/CsaV3_4G026970/CsaV3_6G039940/CsaV3_3G020560/CsaV3_1G008370/CsaV3_3G007460/CsaV3_3G041150/CsaV3_5G001660/CsaV3_1G041720/CsaV3_3G010720/CsaV3_7G000760/CsaV3_7G018620	14	CsaV3_4G006090/CsaV3_6G028390/CsaV3_3G040500/CsaV3_6G037780/CsaV3_3G031190/CsaV3_1G001620/CsaV3_UNG227840/CsaV3_3G000880/CsaV3_7G027790/CsaV3_3G001160/CsaV3_6G000890/CsaV3_2G025850/CsaV3_1G039690/CsaV3_2G025820
csv04712	Circadian rhythm - plant	10/964	31/4203	0.152618	0.594682	CsaV3_1G044210/CsaV3_6G008360/CsaV3_3G027830/CsaV3_7G024490/CsaV3_3G015190/CsaV3_6G036100/CsaV3_6G044000/CsaV3_6G043900/CsaV3_2G025750/CsaV3_5G020710	CsaV3_1G044210/CsaV3_6G008360/CsaV3_3G027830/CsaV3_7G024490/CsaV3_3G015190/CsaV3_6G036100/CsaV3_6G044000/CsaV3_6G043900/CsaV3_2G025750/CsaV3_5G020710	csv:101207969/csv:101214878/csv:101205211/csv:101216952/csv:101212197/csv:101208491/csv:101205903/csv:101207095/csv:101203735/csv:101214586	10	7	CsaV3_6G008360/CsaV3_3G027830/CsaV3_7G024490/CsaV3_3G015190/CsaV3_6G036100/CsaV3_6G044000/CsaV3_6G043900	3	CsaV3_1G044210/CsaV3_2G025750/CsaV3_5G020710
csv00520	Amino sugar and nucleotide sugar metabolism	31/964	114/4203	0.162483	0.596757	CsaV3_4G010130/CsaV3_2G001890/CsaV3_6G006740/CsaV3_5G003330/CsaV3_1G036780/CsaV3_1G028640/CsaV3_2G007810/CsaV3_6G047760/CsaV3_5G004970/CsaV3_3G009770/CsaV3_6G001370/CsaV3_4G001040/CsaV3_6G032500/CsaV3_5G027030/CsaV3_7G026310/CsaV3_7G002310/CsaV3_6G032490/CsaV3_2G031320/CsaV3_3G045370/CsaV3_3G020950/CsaV3_4G008770/CsaV3_4G001060/CsaV3_1G003360/CsaV3_3G013570/CsaV3_2G001900/CsaV3_5G028300/CsaV3_6G0…	CsaV3_4G010130/CsaV3_2G001890/CsaV3_6G006740/CsaV3_5G003330/CsaV3_1G036780/CsaV3_1G028640/CsaV3_2G007810/CsaV3_6G047760/CsaV3_5G004970/CsaV3_3G009770/CsaV3_6G001370/CsaV3_4G001040/CsaV3_6G032500/CsaV3_5G027030/CsaV3_7G026310/CsaV3_7G002310/CsaV3_6G032490/CsaV3_2G031320/CsaV3_3G045370/CsaV3_3G020950/CsaV3_4G008770/CsaV3_4G001060/CsaV3_1G003360/CsaV3_3G013570/CsaV3_2G001900/CsaV3_5G028300/CsaV3_6G0…	csv:101207713/csv:101218300/csv:101213366/csv:101205821/csv:101222574/csv:101214415/csv:101214888/csv:101216853/csv:101220595/csv:101215329/csv:101211496/csv:101213153/csv:101203157/csv:101220205/csv:101209561/csv:101216573/csv:101203157/csv:101214230/csv:101221562/csv:101223130/csv:101222306/csv:101211214/csv:101213179/csv:101208605/csv:101218300/csv:101218883/csv:101203157/csv:101215088/csv:101…	31	9	CsaV3_4G010130/CsaV3_2G001890/CsaV3_6G032500/CsaV3_7G002310/CsaV3_6G032490/CsaV3_3G045370/CsaV3_2G001900/CsaV3_5G028300/CsaV3_6G033570	22	CsaV3_6G006740/CsaV3_5G003330/CsaV3_1G036780/CsaV3_1G028640/CsaV3_2G007810/CsaV3_6G047760/CsaV3_5G004970/CsaV3_3G009770/CsaV3_6G001370/CsaV3_4G001040/CsaV3_5G027030/CsaV3_7G026310/CsaV3_2G031320/CsaV3_3G020950/CsaV3_4G008770/CsaV3_4G001060/CsaV3_1G003360/CsaV3_3G013570/CsaV3_6G047750/CsaV3_6G039140/CsaV3_2G010560/CsaV3_3G032600
csv00564	Glycerophospholipid metabolism	25/964	90/4203	0.163712	0.596757	CsaV3_1G007140/CsaV3_5G034650/CsaV3_3G034040/CsaV3_5G024850/CsaV3_4G024550/CsaV3_3G003480/CsaV3_4G002900/CsaV3_1G043430/CsaV3_4G001340/CsaV3_1G004330/CsaV3_5G028680/CsaV3_7G023230/CsaV3_7G032480/CsaV3_3G048840/CsaV3_3G032790/CsaV3_7G024460/CsaV3_2G033910/CsaV3_5G034660/CsaV3_3G020620/novel.312/CsaV3_6G005980/CsaV3_2G031870/CsaV3_5G024400/CsaV3_6G012360/CsaV3_5G006440	CsaV3_1G007140/CsaV3_5G034650/CsaV3_3G034040/CsaV3_5G024850/CsaV3_4G024550/CsaV3_3G003480/CsaV3_4G002900/CsaV3_1G043430/CsaV3_4G001340/CsaV3_1G004330/CsaV3_5G028680/CsaV3_7G023230/CsaV3_7G032480/CsaV3_3G048840/CsaV3_3G032790/CsaV3_7G024460/CsaV3_2G033910/CsaV3_5G034660/CsaV3_3G020620/-/CsaV3_6G005980/CsaV3_2G031870/CsaV3_5G024400/CsaV3_6G012360/CsaV3_5G006440	csv:101219872/csv:101216053/csv:101214865/csv:101221307/csv:101210022/csv:101208016/csv:101216924/csv:101218054/csv:101218579/csv:101220267/csv:101205141/csv:101216983/csv:101206113/csv:101213494/csv:101218126/csv:101217425/csv:101213816/csv:101215334/csv:101221364/csv:101206945/csv:101218942/csv:101218992/csv:101205809/csv:101210099/csv:101221229	25	9	CsaV3_3G034040/CsaV3_1G043430/CsaV3_4G001340/CsaV3_1G004330/CsaV3_3G048840/CsaV3_7G024460/novel.312/CsaV3_6G005980/CsaV3_5G006440	16	CsaV3_1G007140/CsaV3_5G034650/CsaV3_5G024850/CsaV3_4G024550/CsaV3_3G003480/CsaV3_4G002900/CsaV3_5G028680/CsaV3_7G023230/CsaV3_7G032480/CsaV3_3G032790/CsaV3_2G033910/CsaV3_5G034660/CsaV3_3G020620/CsaV3_2G031870/CsaV3_5G024400/CsaV3_6G012360
csv00906	Carotenoid biosynthesis	10/964	32/4203	0.178945	0.601979	CsaV3_4G007180/CsaV3_4G007560/CsaV3_7G008610/CsaV3_2G027780/CsaV3_1G034470/CsaV3_4G034320/CsaV3_3G017450/CsaV3_4G023380/CsaV3_6G040180/CsaV3_4G003370	CsaV3_4G007180/CsaV3_4G007560/CsaV3_7G008610/CsaV3_2G027780/CsaV3_1G034470/CsaV3_4G034320/CsaV3_3G017450/CsaV3_4G023380/CsaV3_6G040180/CsaV3_4G003370	csv:101220226/csv:101214823/csv:101219389/csv:101220320/csv:101216531/csv:101213916/csv:101212140/csv:101216484/csv:101204961/csv:101211624	10	7	CsaV3_4G007560/CsaV3_7G008610/CsaV3_2G027780/CsaV3_1G034470/CsaV3_4G034320/CsaV3_4G023380/CsaV3_6G040180	3	CsaV3_4G007180/CsaV3_3G017450/CsaV3_4G003370
csv00040	Pentose and glucuronate interconversions	23/964	83/4203	0.179455	0.601979	CsaV3_3G033310/CsaV3_7G026220/CsaV3_4G005340/CsaV3_6G032500/CsaV3_5G027030/CsaV3_1G041370/CsaV3_6G032490/CsaV3_4G025340/CsaV3_7G029580/CsaV3_4G025310/CsaV3_5G031360/CsaV3_4G025300/CsaV3_1G043300/CsaV3_7G033930/CsaV3_6G023840/CsaV3_5G018590/CsaV3_4G008770/CsaV3_3G016700/CsaV3_6G033570/CsaV3_5G026870/CsaV3_2G012050/CsaV3_7G026200/CsaV3_3G031040	CsaV3_3G033310/CsaV3_7G026220/CsaV3_4G005340/CsaV3_6G032500/CsaV3_5G027030/CsaV3_1G041370/CsaV3_6G032490/CsaV3_4G025340/CsaV3_7G029580/CsaV3_4G025310/CsaV3_5G031360/CsaV3_4G025300/CsaV3_1G043300/CsaV3_7G033930/CsaV3_6G023840/CsaV3_5G018590/CsaV3_4G008770/CsaV3_3G016700/CsaV3_6G033570/CsaV3_5G026870/CsaV3_2G012050/CsaV3_7G026200/CsaV3_3G031040	csv:101204929/csv:101220821/csv:101222494/csv:101203157/csv:101220205/csv:101214012/csv:101203157/csv:101209692/csv:101205557/csv:101210436/csv:101212122/csv:101210436/csv:101219551/csv:101212388/csv:101221958/csv:101220540/csv:101222306/csv:101221918/csv:101203157/csv:101217834/csv:101217580/csv:101221055/csv:101207996	23	9	CsaV3_3G033310/CsaV3_4G005340/CsaV3_6G032500/CsaV3_6G032490/CsaV3_4G025340/CsaV3_4G025300/CsaV3_1G043300/CsaV3_6G033570/CsaV3_5G026870	14	CsaV3_7G026220/CsaV3_5G027030/CsaV3_1G041370/CsaV3_7G029580/CsaV3_4G025310/CsaV3_5G031360/CsaV3_7G033930/CsaV3_6G023840/CsaV3_5G018590/CsaV3_4G008770/CsaV3_3G016700/CsaV3_2G012050/CsaV3_7G026200/CsaV3_3G031040
csv00053	Ascorbate and aldarate metabolism	13/964	44/4203	0.190382	0.601979	CsaV3_1G040000/CsaV3_6G032500/CsaV3_5G027030/CsaV3_6G040510/CsaV3_6G032490/CsaV3_2G015040/CsaV3_6G048460/CsaV3_4G008770/CsaV3_7G022020/CsaV3_2G032090/CsaV3_6G033570/CsaV3_3G007270/CsaV3_3G037070	CsaV3_1G040000/CsaV3_6G032500/CsaV3_5G027030/CsaV3_6G040510/CsaV3_6G032490/CsaV3_2G015040/CsaV3_6G048460/CsaV3_4G008770/CsaV3_7G022020/CsaV3_2G032090/CsaV3_6G033570/CsaV3_3G007270/CsaV3_3G037070	csv:101202978/csv:101203157/csv:101220205/csv:101210277/csv:101203157/csv:101205614/csv:101206261/csv:101222306/csv:101205337/csv:101216396/csv:101203157/csv:101221035/csv:101207933	13	7	CsaV3_6G032500/CsaV3_6G040510/CsaV3_6G032490/CsaV3_6G048460/CsaV3_6G033570/CsaV3_3G007270/CsaV3_3G037070	6	CsaV3_1G040000/CsaV3_5G027030/CsaV3_2G015040/CsaV3_4G008770/CsaV3_7G022020/CsaV3_2G032090
csv00860	Porphyrin and chlorophyll metabolism	13/964	44/4203	0.190382	0.601979	CsaV3_2G030530/CsaV3_4G033870/CsaV3_4G031720/CsaV3_2G025670/CsaV3_7G007370/CsaV3_5G010770/CsaV3_2G013440/CsaV3_1G043160/CsaV3_6G031220/CsaV3_6G034450/CsaV3_2G033150/CsaV3_6G050640/CsaV3_1G002370	CsaV3_2G030530/CsaV3_4G033870/CsaV3_4G031720/CsaV3_2G025670/CsaV3_7G007370/CsaV3_5G010770/CsaV3_2G013440/CsaV3_1G043160/CsaV3_6G031220/CsaV3_6G034450/CsaV3_2G033150/CsaV3_6G050640/CsaV3_1G002370	csv:101220615/csv:101208554/csv:101219179/csv:101216568/csv:101208135/csv:101212245/csv:101203653/csv:101217650/csv:101219336/csv:101205768/csv:101222312/csv:101217637/csv:101221755	13	9	CsaV3_2G030530/CsaV3_4G033870/CsaV3_4G031720/CsaV3_5G010770/CsaV3_2G013440/CsaV3_1G043160/CsaV3_6G034450/CsaV3_6G050640/CsaV3_1G002370	4	CsaV3_2G025670/CsaV3_7G007370/CsaV3_6G031220/CsaV3_2G033150
csv00591	Linoleic acid metabolism	8/964	25/4203	0.196069	0.601979	CsaV3_7G034390/CsaV3_2G006380/CsaV3_7G027160/CsaV3_4G023920/CsaV3_4G023810/CsaV3_2G023210/CsaV3_2G006460/CsaV3_4G023820	CsaV3_7G034390/CsaV3_2G006380/CsaV3_7G027160/CsaV3_4G023920/CsaV3_4G023810/CsaV3_2G023210/CsaV3_2G006460/CsaV3_4G023820	csv:101204952/csv:101207406/csv:101222906/csv:101214639/csv:101216566/csv:101207406/csv:101206327/csv:101216318	8	2	CsaV3_4G023810/CsaV3_2G006460	6	CsaV3_7G034390/CsaV3_2G006380/CsaV3_7G027160/CsaV3_4G023920/CsaV3_2G023210/CsaV3_4G023820
csv00710	Carbon fixation in photosynthetic organisms	21/964	76/4203	0.197108	0.601979	CsaV3_3G030440/novel.1174/CsaV3_3G020110/CsaV3_5G034910/CsaV3_6G028390/CsaV3_2G004240/CsaV3_7G021470/CsaV3_3G001220/CsaV3_3G013930/CsaV3_3G007460/CsaV3_UNG009100/CsaV3_7G005670/CsaV3_5G031200/CsaV3_5G031220/CsaV3_1G039740/novel.575/CsaV3_7G006840/CsaV3_6G013500/CsaV3_5G035850/CsaV3_3G048280/CsaV3_3G031010	CsaV3_3G030440/-/CsaV3_3G020110/CsaV3_5G034910/CsaV3_6G028390/CsaV3_2G004240/CsaV3_7G021470/CsaV3_3G001220/CsaV3_3G013930/CsaV3_3G007460/CsaV3_UNG009100/CsaV3_7G005670/CsaV3_5G031200/CsaV3_5G031220/CsaV3_1G039740/-/CsaV3_7G006840/CsaV3_6G013500/CsaV3_5G035850/CsaV3_3G048280/CsaV3_3G031010	csv:101220055/csv:101212275/csv:101202856/csv:101211316/csv:101214377/csv:101221375/csv:101219476/csv:101208330/csv:101214608/csv:101221189/csv:101212275/csv:101208202/csv:101213570/csv:101220645/csv:101219936/csv:101212275/csv:101206118/csv:101215670/csv:101211170/csv:101222382/csv:101207254	21	16	CsaV3_3G030440/novel.1174/CsaV3_3G020110/CsaV3_7G021470/CsaV3_3G001220/CsaV3_3G013930/CsaV3_3G007460/CsaV3_7G005670/CsaV3_5G031200/CsaV3_5G031220/novel.575/CsaV3_7G006840/CsaV3_6G013500/CsaV3_5G035850/CsaV3_3G048280/CsaV3_3G031010	5	CsaV3_5G034910/CsaV3_6G028390/CsaV3_2G004240/CsaV3_UNG009100/CsaV3_1G039740
csv00920	Sulfur metabolism	9/964	30/4203	0.234239	0.678692	CsaV3_6G000650/CsaV3_6G048960/CsaV3_4G000200/CsaV3_3G041150/CsaV3_1G042860/CsaV3_3G043250/CsaV3_1G010690/CsaV3_1G039690/CsaV3_7G018620	CsaV3_6G000650/CsaV3_6G048960/CsaV3_4G000200/CsaV3_3G041150/CsaV3_1G042860/CsaV3_3G043250/CsaV3_1G010690/CsaV3_1G039690/CsaV3_7G018620	csv:101220896/csv:101220567/csv:101213954/csv:101212851/csv:101214065/csv:101204776/csv:101211864/csv:101218750/csv:101213467	9	4	CsaV3_6G000650/CsaV3_3G041150/CsaV3_3G043250/CsaV3_7G018620	5	CsaV3_6G048960/CsaV3_4G000200/CsaV3_1G042860/CsaV3_1G010690/CsaV3_1G039690
csv04136	Autophagy - other	9/964	30/4203	0.234239	0.678692	CsaV3_6G008300/CsaV3_2G007690/CsaV3_5G004160/CsaV3_2G011360/CsaV3_3G043520/CsaV3_6G008640/CsaV3_2G034910/CsaV3_6G009210/CsaV3_2G007770	CsaV3_6G008300/CsaV3_2G007690/CsaV3_5G004160/CsaV3_2G011360/CsaV3_3G043520/CsaV3_6G008640/CsaV3_2G034910/CsaV3_6G009210/CsaV3_2G007770	csv:101215834/csv:101216810/csv:101205863/csv:101211819/csv:101214589/csv:101210427/csv:101217161/csv:101204045/csv:101215606	9	9	CsaV3_6G008300/CsaV3_2G007690/CsaV3_5G004160/CsaV3_2G011360/CsaV3_3G043520/CsaV3_6G008640/CsaV3_2G034910/CsaV3_6G009210/CsaV3_2G007770	0
csv00650	Butanoate metabolism	7/964	23/4203	0.262255	0.715099	CsaV3_6G028580/CsaV3_4G032320/CsaV3_3G015070/CsaV3_4G007380/CsaV3_5G014210/CsaV3_6G038810/CsaV3_4G007370	CsaV3_6G028580/CsaV3_4G032320/CsaV3_3G015070/CsaV3_4G007380/CsaV3_5G014210/CsaV3_6G038810/CsaV3_4G007370	csv:101221248/csv:101219660/csv:101209903/csv:101220932/csv:101212902/csv:101203798/csv:101211530	7	3	CsaV3_6G028580/CsaV3_5G014210/CsaV3_6G038810	4	CsaV3_4G032320/CsaV3_3G015070/CsaV3_4G007380/CsaV3_4G007370
csv00730	Thiamine metabolism	7/964	23/4203	0.262255	0.715099	CsaV3_7G029140/CsaV3_2G003460/CsaV3_1G036050/CsaV3_1G031250/CsaV3_3G011380/CsaV3_6G022370/CsaV3_6G044470	CsaV3_7G029140/CsaV3_2G003460/CsaV3_1G036050/CsaV3_1G031250/CsaV3_3G011380/CsaV3_6G022370/CsaV3_6G044470	csv:101210895/csv:101203230/csv:101213554/csv:101207760/csv:101219530/csv:101209552/csv:101218146	7	4	CsaV3_7G029140/CsaV3_3G011380/CsaV3_6G022370/CsaV3_6G044470	3	CsaV3_2G003460/CsaV3_1G036050/CsaV3_1G031250
csv00410	beta-Alanine metabolism	12/964	43/4203	0.268502	0.715099	CsaV3_4G032140/CsaV3_6G028580/CsaV3_7G022600/CsaV3_1G043650/CsaV3_5G003790/CsaV3_1G001170/CsaV3_6G038890/CsaV3_7G030830/CsaV3_2G001470/CsaV3_UNG218460/CsaV3_UNG144110/CsaV3_1G046130	CsaV3_4G032140/CsaV3_6G028580/CsaV3_7G022600/CsaV3_1G043650/CsaV3_5G003790/CsaV3_1G001170/CsaV3_6G038890/CsaV3_7G030830/CsaV3_2G001470/CsaV3_UNG218460/CsaV3_UNG144110/CsaV3_1G046130	csv:101205765/csv:101221248/csv:101210998/csv:101222552/csv:101213059/csv:101204200/csv:101204944/csv:101209263/csv:101205432/csv:101218159/csv:101218159/csv:101205111	12	5	CsaV3_6G028580/CsaV3_7G030830/CsaV3_2G001470/CsaV3_UNG144110/CsaV3_1G046130	7	CsaV3_4G032140/CsaV3_7G022600/CsaV3_1G043650/CsaV3_5G003790/CsaV3_1G001170/CsaV3_6G038890/CsaV3_UNG218460
csv00010	Glycolysis / Gluconeogenesis	30/964	117/4203	0.272117	0.715099	CsaV3_2G001890/CsaV3_3G033310/CsaV3_6G050730/CsaV3_5G010430/CsaV3_6G031750/CsaV3_2G003650/CsaV3_2G017260/CsaV3_6G031760/CsaV3_7G021470/CsaV3_3G013930/CsaV3_6G000070/CsaV3_4G025340/CsaV3_3G015070/CsaV3_4G025310/CsaV3_6G048080/CsaV3_4G006350/CsaV3_4G025300/CsaV3_7G024950/CsaV3_3G023460/CsaV3_4G000040/CsaV3_3G020130/CsaV3_2G001900/CsaV3_5G028300/CsaV3_7G006840/CsaV3_5G021900/CsaV3_4G026400/CsaV3_6G0…	CsaV3_2G001890/CsaV3_3G033310/CsaV3_6G050730/CsaV3_5G010430/CsaV3_6G031750/CsaV3_2G003650/CsaV3_2G017260/CsaV3_6G031760/CsaV3_7G021470/CsaV3_3G013930/CsaV3_6G000070/CsaV3_4G025340/CsaV3_3G015070/CsaV3_4G025310/CsaV3_6G048080/CsaV3_4G006350/CsaV3_4G025300/CsaV3_7G024950/CsaV3_3G023460/CsaV3_4G000040/CsaV3_3G020130/CsaV3_2G001900/CsaV3_5G028300/CsaV3_7G006840/CsaV3_5G021900/CsaV3_4G026400/CsaV3_6G0…	csv:101218300/csv:101204929/csv:101217174/csv:101205760/csv:101212881/csv:101208699/csv:101209304/csv:101211996/csv:101219476/csv:101214608/csv:101207718/csv:101209692/csv:101209903/csv:101210436/csv:101211230/csv:101205699/csv:101210436/csv:101209854/csv:101220704/csv:101220786/csv:101203579/csv:101218300/csv:101218883/csv:101206118/csv:101222352/csv:101217534/csv:101215670/csv:101208701/csv:101…	30	16	CsaV3_2G001890/CsaV3_3G033310/CsaV3_2G017260/CsaV3_6G031760/CsaV3_7G021470/CsaV3_3G013930/CsaV3_6G000070/CsaV3_4G025340/CsaV3_4G025300/CsaV3_2G001900/CsaV3_5G028300/CsaV3_7G006840/CsaV3_5G021900/CsaV3_6G013500/CsaV3_6G045610/CsaV3_3G048280	14	CsaV3_6G050730/CsaV3_5G010430/CsaV3_6G031750/CsaV3_2G003650/CsaV3_3G015070/CsaV3_4G025310/CsaV3_6G048080/CsaV3_4G006350/CsaV3_7G024950/CsaV3_3G023460/CsaV3_4G000040/CsaV3_3G020130/CsaV3_4G026400/CsaV3_6G039140
csv00130	Ubiquinone and other terpenoid-quinone biosynthesis	12/964	44/4203	0.297797	0.75242	CsaV3_1G031500/CsaV3_2G009070/CsaV3_6G015650/CsaV3_6G046030/CsaV3_3G030410/CsaV3_2G008500/CsaV3_3G015670/CsaV3_4G006210/CsaV3_3G005530/CsaV3_2G036090/CsaV3_5G031500/CsaV3_6G016300	CsaV3_1G031500/CsaV3_2G009070/CsaV3_6G015650/CsaV3_6G046030/CsaV3_3G030410/CsaV3_2G008500/CsaV3_3G015670/CsaV3_4G006210/CsaV3_3G005530/CsaV3_2G036090/CsaV3_5G031500/CsaV3_6G016300	csv:101218077/csv:101205537/csv:101220123/csv:101216659/csv:101219578/csv:101221791/csv:101207188/csv:101214174/csv:101209481/csv:101221344/csv:101216706/csv:101211672	12	6	CsaV3_1G031500/CsaV3_3G015670/CsaV3_4G006210/CsaV3_2G036090/CsaV3_5G031500/CsaV3_6G016300	6	CsaV3_2G009070/CsaV3_6G015650/CsaV3_6G046030/CsaV3_3G030410/CsaV3_2G008500/CsaV3_3G005530
csv03030	DNA replication	11/964	40/4203	0.299636	0.75242	CsaV3_6G046400/CsaV3_4G033030/CsaV3_6G016510/CsaV3_1G046580/CsaV3_1G031640/CsaV3_6G008170/CsaV3_2G016500/CsaV3_6G053180/CsaV3_5G039570/CsaV3_6G034260/CsaV3_6G051630	CsaV3_6G046400/CsaV3_4G033030/CsaV3_6G016510/CsaV3_1G046580/CsaV3_1G031640/CsaV3_6G008170/CsaV3_2G016500/CsaV3_6G053180/CsaV3_5G039570/CsaV3_6G034260/CsaV3_6G051630	csv:101218071/csv:101202933/csv:101208473/csv:101208243/csv:101219981/csv:101217274/csv:101211201/csv:101219775/csv:101203146/csv:101217230/csv:101210889	11	2	CsaV3_1G046580/CsaV3_2G016500	9	CsaV3_6G046400/CsaV3_4G033030/CsaV3_6G016510/CsaV3_1G031640/CsaV3_6G008170/CsaV3_6G053180/CsaV3_5G039570/CsaV3_6G034260/CsaV3_6G051630
csv00330	Arginine and proline metabolism	15/964	57/4203	0.317672	0.773627	CsaV3_3G020550/CsaV3_4G032140/CsaV3_3G020560/CsaV3_1G008370/CsaV3_1G039020/CsaV3_4G003800/CsaV3_1G001620/CsaV3_5G037760/CsaV3_3G014000/CsaV3_7G030830/CsaV3_1G004640/CsaV3_2G001470/CsaV3_5G038920/CsaV3_7G000850/CsaV3_3G034580	CsaV3_3G020550/CsaV3_4G032140/CsaV3_3G020560/CsaV3_1G008370/CsaV3_1G039020/CsaV3_4G003800/CsaV3_1G001620/CsaV3_5G037760/CsaV3_3G014000/CsaV3_7G030830/CsaV3_1G004640/CsaV3_2G001470/CsaV3_5G038920/CsaV3_7G000850/CsaV3_3G034580	csv:101207514/csv:101205765/csv:101207514/csv:101221659/csv:101209171/csv:101206818/csv:101210007/csv:101210382/csv:101215570/csv:101209263/csv:101206436/csv:101205432/csv:101219166/csv:101205749/csv:101222070	15	9	CsaV3_3G020550/CsaV3_3G020560/CsaV3_1G008370/CsaV3_1G039020/CsaV3_4G003800/CsaV3_7G030830/CsaV3_1G004640/CsaV3_2G001470/CsaV3_3G034580	6	CsaV3_4G032140/CsaV3_1G001620/CsaV3_5G037760/CsaV3_3G014000/CsaV3_5G038920/CsaV3_7G000850
csv01212	Fatty acid metabolism	17/964	66/4203	0.336046	0.773627	CsaV3_6G028580/CsaV3_5G002040/CsaV3_6G023960/CsaV3_1G041340/CsaV3_6G022170/CsaV3_3G013480/CsaV3_3G038870/CsaV3_5G004490/CsaV3_4G028240/CsaV3_6G025240/CsaV3_6G024070/CsaV3_6G030990/CsaV3_4G006560/CsaV3_UNG218460/CsaV3_UNG144110/CsaV3_3G043300/CsaV3_6G024060	CsaV3_6G028580/CsaV3_5G002040/CsaV3_6G023960/CsaV3_1G041340/CsaV3_6G022170/CsaV3_3G013480/CsaV3_3G038870/CsaV3_5G004490/CsaV3_4G028240/CsaV3_6G025240/CsaV3_6G024070/CsaV3_6G030990/CsaV3_4G006560/CsaV3_UNG218460/CsaV3_UNG144110/CsaV3_3G043300/CsaV3_6G024060	csv:101221248/csv:101209130/csv:101218899/csv:101213530/csv:101212013/csv:101207461/csv:101222623/csv:101222043/csv:101218462/csv:101218899/csv:101218899/csv:101204316/csv:101202800/csv:101218159/csv:101218159/csv:101205498/csv:101218899	17	12	CsaV3_6G028580/CsaV3_6G023960/CsaV3_1G041340/CsaV3_3G013480/CsaV3_3G038870/CsaV3_5G004490/CsaV3_4G028240/CsaV3_6G025240/CsaV3_6G024070/CsaV3_4G006560/CsaV3_UNG144110/CsaV3_6G024060	5	CsaV3_5G002040/CsaV3_6G022170/CsaV3_6G030990/CsaV3_UNG218460/CsaV3_3G043300
csv01200	Carbon metabolism	59/964	244/4203	0.341518	0.773627	CsaV3_2G001890/CsaV3_3G030440/CsaV3_6G031750/novel.1174/CsaV3_3G020110/CsaV3_5G034910/CsaV3_6G000650/CsaV3_2G003650/CsaV3_6G048160/CsaV3_2G017260/CsaV3_3G042420/CsaV3_6G028390/CsaV3_1G002920/CsaV3_2G004240/CsaV3_6G031760/CsaV3_7G021470/CsaV3_3G001220/CsaV3_1G043650/CsaV3_3G013930/CsaV3_3G031190/CsaV3_4G027510/CsaV3_6G000070/CsaV3_3G007460/CsaV3_UNG227840/CsaV3_4G028640/CsaV3_3G015070/CsaV3_UNG009…	CsaV3_2G001890/CsaV3_3G030440/CsaV3_6G031750/-/CsaV3_3G020110/CsaV3_5G034910/CsaV3_6G000650/CsaV3_2G003650/CsaV3_6G048160/CsaV3_2G017260/CsaV3_3G042420/CsaV3_6G028390/CsaV3_1G002920/CsaV3_2G004240/CsaV3_6G031760/CsaV3_7G021470/CsaV3_3G001220/CsaV3_1G043650/CsaV3_3G013930/CsaV3_3G031190/CsaV3_4G027510/CsaV3_6G000070/CsaV3_3G007460/CsaV3_UNG227840/CsaV3_4G028640/CsaV3_3G015070/CsaV3_UNG009100/CsaV3…	csv:101218300/csv:101220055/csv:101212881/csv:101212275/csv:101202856/csv:101211316/csv:101220896/csv:101208699/csv:101210494/csv:101209304/csv:101213516/csv:101214377/csv:101208305/csv:101221375/csv:101211996/csv:101219476/csv:101208330/csv:101222552/csv:101214608/csv:101219910/csv:101207741/csv:101207718/csv:101221189/csv:101219910/csv:101215287/csv:101209903/csv:101212275/csv:101211230/csv:101…	59	36	CsaV3_2G001890/CsaV3_3G030440/novel.1174/CsaV3_3G020110/CsaV3_6G000650/CsaV3_6G048160/CsaV3_2G017260/CsaV3_3G042420/CsaV3_1G002920/CsaV3_6G031760/CsaV3_7G021470/CsaV3_3G001220/CsaV3_3G013930/CsaV3_4G027510/CsaV3_6G000070/CsaV3_3G007460/CsaV3_7G005670/CsaV3_3G019180/CsaV3_5G031200/CsaV3_7G032960/CsaV3_6G051820/CsaV3_5G031220/CsaV3_2G001900/CsaV3_6G039090/novel.575/CsaV3_7G006840/CsaV3_5G021900/Csa…	23	CsaV3_6G031750/CsaV3_5G034910/CsaV3_2G003650/CsaV3_6G028390/CsaV3_2G004240/CsaV3_1G043650/CsaV3_3G031190/CsaV3_UNG227840/CsaV3_4G028640/CsaV3_3G015070/CsaV3_UNG009100/CsaV3_6G048080/CsaV3_6G043980/CsaV3_3G023460/CsaV3_1G039740/CsaV3_4G000040/CsaV3_3G020130/CsaV3_UNG218460/CsaV3_2G035120/CsaV3_6G039140/CsaV3_3G030860/CsaV3_1G039690/CsaV3_3G009440
csv00904	Diterpenoid biosynthesis	7/964	25/4203	0.343929	0.773627	CsaV3_5G005560/CsaV3_7G032870/CsaV3_3G001930/CsaV3_3G010170/CsaV3_3G016600/CsaV3_3G049400/CsaV3_6G006520	CsaV3_5G005560/CsaV3_7G032870/CsaV3_3G001930/CsaV3_3G010170/CsaV3_3G016600/CsaV3_3G049400/CsaV3_6G006520	csv:101212803/csv:101223012/csv:101208903/csv:101221667/csv:101212262/csv:101206798/csv:101220640	7	6	CsaV3_5G005560/CsaV3_7G032870/CsaV3_3G001930/CsaV3_3G010170/CsaV3_3G016600/CsaV3_6G006520	1	CsaV3_3G049400
csv00450	Selenocompound metabolism	5/964	17/4203	0.347437	0.773627	CsaV3_3G040500/CsaV3_3G000880/CsaV3_3G041150/CsaV3_5G001660/CsaV3_1G041720	CsaV3_3G040500/CsaV3_3G000880/CsaV3_3G041150/CsaV3_5G001660/CsaV3_1G041720	csv:101203129/csv:101214172/csv:101212851/csv:101207013/csv:101218702	5	3	CsaV3_3G041150/CsaV3_5G001660/CsaV3_1G041720	2	CsaV3_3G040500/CsaV3_3G000880
csv00051	Fructose and mannose metabolism	14/964	54/4203	0.349159	0.773627	CsaV3_2G001890/CsaV3_6G006740/CsaV3_5G004970/CsaV3_3G045360/CsaV3_6G001370/CsaV3_7G021470/CsaV3_5G003450/CsaV3_6G048080/CsaV3_3G020950/CsaV3_3G023460/CsaV3_2G001900/CsaV3_3G016700/CsaV3_7G006840/CsaV3_6G039140	CsaV3_2G001890/CsaV3_6G006740/CsaV3_5G004970/CsaV3_3G045360/CsaV3_6G001370/CsaV3_7G021470/CsaV3_5G003450/CsaV3_6G048080/CsaV3_3G020950/CsaV3_3G023460/CsaV3_2G001900/CsaV3_3G016700/CsaV3_7G006840/CsaV3_6G039140	csv:101218300/csv:101213366/csv:101220595/csv:101221789/csv:101211496/csv:101219476/csv:101208090/csv:101211230/csv:101223130/csv:101220704/csv:101218300/csv:101221918/csv:101206118/csv:101208701	14	5	CsaV3_2G001890/CsaV3_3G045360/CsaV3_7G021470/CsaV3_2G001900/CsaV3_7G006840	9	CsaV3_6G006740/CsaV3_5G004970/CsaV3_6G001370/CsaV3_5G003450/CsaV3_6G048080/CsaV3_3G020950/CsaV3_3G023460/CsaV3_3G016700/CsaV3_6G039140
csv00945	Stilbenoid, diarylheptanoid and gingerol biosynthesis	4/964	14/4203	0.40528	0.880705	CsaV3_2G009070/CsaV3_5G030330/CsaV3_2G025200/CsaV3_7G008590	CsaV3_2G009070/CsaV3_5G030330/CsaV3_2G025200/CsaV3_7G008590	csv:101205537/csv:101212121/csv:101207100/csv:101205648	4	1	CsaV3_7G008590	3	CsaV3_2G009070/CsaV3_5G030330/CsaV3_2G025200
csv03430	Mismatch repair	8/964	31/4203	0.419072	0.893494	CsaV3_6G046400/CsaV3_3G017020/CsaV3_4G033030/CsaV3_6G016510/CsaV3_1G031640/CsaV3_1G003630/CsaV3_2G002320/CsaV3_6G034260	CsaV3_6G046400/CsaV3_3G017020/CsaV3_4G033030/CsaV3_6G016510/CsaV3_1G031640/CsaV3_1G003630/CsaV3_2G002320/CsaV3_6G034260	csv:101218071/csv:101214720/csv:101202933/csv:101208473/csv:101219981/csv:101215589/csv:101210755/csv:101217230	8	1	CsaV3_1G003630	7	CsaV3_6G046400/CsaV3_3G017020/CsaV3_4G033030/CsaV3_6G016510/CsaV3_1G031640/CsaV3_2G002320/CsaV3_6G034260
csv01230	Biosynthesis of amino acids	48/964	204/4203	0.44631	0.917348	CsaV3_2G033650/CsaV3_3G043270/CsaV3_5G034910/CsaV3_6G000650/CsaV3_6G045310/CsaV3_6G039940/CsaV3_2G003300/CsaV3_2G017260/CsaV3_1G002920/CsaV3_2G004240/CsaV3_7G021470/CsaV3_3G040500/CsaV3_2G001290/CsaV3_3G031190/CsaV3_UNG227840/CsaV3_2G017780/CsaV3_6G021500/CsaV3_4G031290/CsaV3_1G014510/CsaV3_6G042420/CsaV3_4G028640/CsaV3_2G034880/CsaV3_6G001800/CsaV3_2G015040/CsaV3_6G048080/CsaV3_3G041150/CsaV3_3G…	CsaV3_2G033650/CsaV3_3G043270/CsaV3_5G034910/CsaV3_6G000650/CsaV3_6G045310/CsaV3_6G039940/CsaV3_2G003300/CsaV3_2G017260/CsaV3_1G002920/CsaV3_2G004240/CsaV3_7G021470/CsaV3_3G040500/CsaV3_2G001290/CsaV3_3G031190/CsaV3_UNG227840/CsaV3_2G017780/CsaV3_6G021500/CsaV3_4G031290/CsaV3_1G014510/CsaV3_6G042420/CsaV3_4G028640/CsaV3_2G034880/CsaV3_6G001800/CsaV3_2G015040/CsaV3_6G048080/CsaV3_3G041150/CsaV3_3G…	csv:101216470/csv:101222321/csv:101211316/csv:101220896/csv:101207177/csv:101222328/csv:101214147/csv:101209304/csv:101208305/csv:101221375/csv:101219476/csv:101203129/csv:101208070/csv:101219910/csv:101219910/csv:101213380/csv:101217934/csv:101203740/csv:101222151/csv:101204463/csv:101215287/csv:101217625/csv:101217107/csv:101205614/csv:101211230/csv:101212851/csv:101211272/csv:101213570/csv:101…	48	23	CsaV3_3G043270/CsaV3_6G000650/CsaV3_6G039940/CsaV3_2G003300/CsaV3_2G017260/CsaV3_1G002920/CsaV3_7G021470/CsaV3_6G021500/CsaV3_2G034880/CsaV3_6G001800/CsaV3_3G041150/CsaV3_3G019180/CsaV3_5G031200/CsaV3_1G041720/CsaV3_5G031220/CsaV3_1G000670/CsaV3_5G014210/CsaV3_2G031570/CsaV3_6G013500/CsaV3_6G045610/CsaV3_3G031010/CsaV3_3G034580/CsaV3_7G018620	25	CsaV3_2G033650/CsaV3_5G034910/CsaV3_6G045310/CsaV3_2G004240/CsaV3_3G040500/CsaV3_2G001290/CsaV3_3G031190/CsaV3_UNG227840/CsaV3_2G017780/CsaV3_4G031290/CsaV3_1G014510/CsaV3_6G042420/CsaV3_4G028640/CsaV3_2G015040/CsaV3_6G048080/CsaV3_1G010970/CsaV3_3G023460/CsaV3_4G000040/CsaV3_6G042130/CsaV3_3G013840/CsaV3_3G027930/CsaV3_1G008610/CsaV3_3G009780/CsaV3_1G039690/CsaV3_2G025820
csv00900	Terpenoid backbone biosynthesis	12/964	49/4203	0.452496	0.917348	CsaV3_5G014680/CsaV3_7G023860/CsaV3_1G031250/CsaV3_2G005140/CsaV3_6G009990/CsaV3_6G016250/CsaV3_1G036440/CsaV3_5G025100/CsaV3_2G017600/CsaV3_7G001340/CsaV3_5G035560/CsaV3_1G002370	CsaV3_5G014680/CsaV3_7G023860/CsaV3_1G031250/CsaV3_2G005140/CsaV3_6G009990/CsaV3_6G016250/CsaV3_1G036440/CsaV3_5G025100/CsaV3_2G017600/CsaV3_7G001340/CsaV3_5G035560/CsaV3_1G002370	csv:101210090/csv:101217388/csv:101207760/csv:101211331/csv:101213994/csv:101206217/csv:101220953/csv:101216243/csv:101209799/csv:101213533/csv:101210057/csv:101221755	12	5	CsaV3_7G023860/CsaV3_1G036440/CsaV3_2G017600/CsaV3_7G001340/CsaV3_1G002370	7	CsaV3_5G014680/CsaV3_1G031250/CsaV3_2G005140/CsaV3_6G009990/CsaV3_6G016250/CsaV3_5G025100/CsaV3_5G035560
csv00531	Glycosaminoglycan degradation	4/964	15/4203	0.462733	0.917348	CsaV3_2G016140/CsaV3_3G032600/CsaV3_3G015010/CsaV3_1G002710	CsaV3_2G016140/CsaV3_3G032600/CsaV3_3G015010/CsaV3_1G002710	csv:101220222/csv:101211123/csv:101213640/csv:101205085	4	0		4	CsaV3_2G016140/CsaV3_3G032600/CsaV3_3G015010/CsaV3_1G002710
csv00909	Sesquiterpenoid and triterpenoid biosynthesis	4/964	15/4203	0.462733	0.917348	CsaV3_3G003670/CsaV3_3G003660/CsaV3_4G035350/CsaV3_3G005740	CsaV3_3G003670/CsaV3_3G003660/CsaV3_4G035350/CsaV3_3G005740	csv:101202882/csv:101202882/csv:101204949/csv:101211540	4	0		4	CsaV3_3G003670/CsaV3_3G003660/CsaV3_4G035350/CsaV3_3G005740
csv04145	Phagosome	15/964	63/4203	0.48331	0.941621	CsaV3_2G029570/CsaV3_4G032990/CsaV3_7G021690/CsaV3_3G030880/CsaV3_2G029210/CsaV3_2G034580/CsaV3_1G043560/CsaV3_5G002840/CsaV3_4G002420/CsaV3_4G017500/CsaV3_2G017730/CsaV3_1G009720/CsaV3_1G009950/CsaV3_6G050550/CsaV3_3G041630	CsaV3_2G029570/CsaV3_4G032990/CsaV3_7G021690/CsaV3_3G030880/CsaV3_2G029210/CsaV3_2G034580/CsaV3_1G043560/CsaV3_5G002840/CsaV3_4G002420/CsaV3_4G017500/CsaV3_2G017730/CsaV3_1G009720/CsaV3_1G009950/CsaV3_6G050550/CsaV3_3G041630	csv:101204817/csv:101206157/csv:101202759/csv:101208227/csv:101209817/csv:101220160/csv:101221614/csv:101219333/csv:101203114/csv:101218331/csv:101212418/csv:101220011/csv:101207554/csv:101218591/csv:101203260	15	6	CsaV3_7G021690/CsaV3_2G029210/CsaV3_2G034580/CsaV3_5G002840/CsaV3_6G050550/CsaV3_3G041630	9	CsaV3_2G029570/CsaV3_4G032990/CsaV3_3G030880/CsaV3_1G043560/CsaV3_4G002420/CsaV3_4G017500/CsaV3_2G017730/CsaV3_1G009720/CsaV3_1G009950
csv03440	Homologous recombination	16/964	69/4203	0.527383	0.996167	CsaV3_3G026510/CsaV3_UNG178380/CsaV3_UNG082660/novel.1064/CsaV3_UNG098730/CsaV3_4G033030/CsaV3_3G039390/CsaV3_3G044350/CsaV3_UNG040210/CsaV3_1G031640/CsaV3_5G010570/CsaV3_3G028200/CsaV3_3G021130/CsaV3_UNG178370/CsaV3_2G001430/CsaV3_3G019190	CsaV3_3G026510/CsaV3_UNG178380/CsaV3_UNG082660/-/CsaV3_UNG098730/CsaV3_4G033030/CsaV3_3G039390/CsaV3_3G044350/CsaV3_UNG040210/CsaV3_1G031640/CsaV3_5G010570/CsaV3_3G028200/CsaV3_3G021130/CsaV3_UNG178370/CsaV3_2G001430/CsaV3_3G019190	csv:101212525/csv:101210305/csv:101210305/csv:101210305/csv:101210305/csv:101202933/csv:101209351/csv:101217141/csv:101210305/csv:101219981/csv:101215377/csv:101222995/csv:101205356/csv:101210305/csv:101213032/csv:101211021	16	4	CsaV3_UNG082660/novel.1064/CsaV3_5G010570/CsaV3_3G019190	12	CsaV3_3G026510/CsaV3_UNG178380/CsaV3_UNG098730/CsaV3_4G033030/CsaV3_3G039390/CsaV3_3G044350/CsaV3_UNG040210/CsaV3_1G031640/CsaV3_3G028200/CsaV3_3G021130/CsaV3_UNG178370/CsaV3_2G001430
csv00061	Fatty acid biosynthesis	8/964	34/4203	0.533937	0.996167	CsaV3_5G002040/CsaV3_1G041340/CsaV3_3G013480/CsaV3_7G026160/CsaV3_4G028240/CsaV3_6G030990/CsaV3_4G006560/CsaV3_3G043300	CsaV3_5G002040/CsaV3_1G041340/CsaV3_3G013480/CsaV3_7G026160/CsaV3_4G028240/CsaV3_6G030990/CsaV3_4G006560/CsaV3_3G043300	csv:101209130/csv:101213530/csv:101207461/csv:101221530/csv:101218462/csv:101204316/csv:101202800/csv:101205498	8	4	CsaV3_1G041340/CsaV3_3G013480/CsaV3_4G028240/CsaV3_4G006560	4	CsaV3_5G002040/CsaV3_7G026160/CsaV3_6G030990/CsaV3_3G043300
csv00780	Biotin metabolism	3/964	841489	0.543129	0.996167	CsaV3_1G031330/CsaV3_1G041340/CsaV3_3G043300	CsaV3_1G031330/CsaV3_1G041340/CsaV3_3G043300	csv:101216016/csv:101213530/csv:101205498	3	2	CsaV3_1G031330/CsaV3_1G041340	1	CsaV3_3G043300
csv01040	Biosynthesis of unsaturated fatty acids	5/964	21/4203	0.54657	0.996167	CsaV3_6G022170/CsaV3_3G038870/CsaV3_6G030990/CsaV3_UNG218460/CsaV3_UNG144110	CsaV3_6G022170/CsaV3_3G038870/CsaV3_6G030990/CsaV3_UNG218460/CsaV3_UNG144110	csv:101212013/csv:101222623/csv:101204316/csv:101218159/csv:101218159	5	2	CsaV3_3G038870/CsaV3_UNG144110	3	CsaV3_6G022170/CsaV3_6G030990/CsaV3_UNG218460
csv00562	Inositol phosphate metabolism	15/964	66/4203	0.56463	1	CsaV3_5G010430/CsaV3_1G040000/CsaV3_7G021690/CsaV3_1G043430/CsaV3_2G015040/CsaV3_6G048460/CsaV3_1G017150/CsaV3_7G034100/CsaV3_2G036580/CsaV3_6G037410/CsaV3_2G030590/CsaV3_3G041100/CsaV3_3G002010/CsaV3_6G043500/CsaV3_UNG190490	CsaV3_5G010430/CsaV3_1G040000/CsaV3_7G021690/CsaV3_1G043430/CsaV3_2G015040/CsaV3_6G048460/CsaV3_1G017150/CsaV3_7G034100/CsaV3_2G036580/CsaV3_6G037410/CsaV3_2G030590/CsaV3_3G041100/CsaV3_3G002010/CsaV3_6G043500/CsaV3_UNG190490	csv:101205760/csv:101202978/csv:101202759/csv:101218054/csv:101205614/csv:101206261/csv:101218450/csv:101213518/csv:101223134/csv:101215596/csv:101206636/csv:101212127/csv:101215556/csv:101213277/csv:101207441	15	4	CsaV3_7G021690/CsaV3_1G043430/CsaV3_6G048460/CsaV3_UNG190490	11	CsaV3_5G010430/CsaV3_1G040000/CsaV3_2G015040/CsaV3_1G017150/CsaV3_7G034100/CsaV3_2G036580/CsaV3_6G037410/CsaV3_2G030590/CsaV3_3G041100/CsaV3_3G002010/CsaV3_6G043500
csv00670	One carbon pool by folate	4/964	17/4203	0.570595	1	CsaV3_6G005110/CsaV3_4G028640/CsaV3_3G019180/CsaV3_1G010620	CsaV3_6G005110/CsaV3_4G028640/CsaV3_3G019180/CsaV3_1G010620	csv:101222878/csv:101215287/csv:101211272/csv:101209820	4	3	CsaV3_6G005110/CsaV3_3G019180/CsaV3_1G010620	1	CsaV3_4G028640
csv00350	Tyrosine metabolism	8/964	36/4203	0.605498	1	CsaV3_6G031750/CsaV3_2G019530/CsaV3_6G031760/CsaV3_7G022600/CsaV3_5G003790/CsaV3_1G031900/CsaV3_7G024950/CsaV3_1G001170	CsaV3_6G031750/CsaV3_2G019530/CsaV3_6G031760/CsaV3_7G022600/CsaV3_5G003790/CsaV3_1G031900/CsaV3_7G024950/CsaV3_1G001170	csv:101212881/csv:101213302/csv:101211996/csv:101210998/csv:101213059/csv:101203411/csv:101209854/csv:101204200	8	1	CsaV3_6G031760	7	CsaV3_6G031750/CsaV3_2G019530/CsaV3_7G022600/CsaV3_5G003790/CsaV3_1G031900/CsaV3_7G024950/CsaV3_1G001170
csv00513	Various types of N-glycan biosynthesis	7/964	32/4203	0.625318	1	CsaV3_7G008560/CsaV3_1G007480/CsaV3_7G002510/CsaV3_1G039140/CsaV3_7G018720/CsaV3_3G032600/CsaV3_6G004710	CsaV3_7G008560/CsaV3_1G007480/CsaV3_7G002510/CsaV3_1G039140/CsaV3_7G018720/CsaV3_3G032600/CsaV3_6G004710	csv:101205170/csv:101206027/csv:101213679/csv:101210410/csv:101217309/csv:101211123/csv:101216230	7	2	CsaV3_1G039140/CsaV3_6G004710	5	CsaV3_7G008560/CsaV3_1G007480/CsaV3_7G002510/CsaV3_7G018720/CsaV3_3G032600
csv00565	Ether lipid metabolism	5/964	23/4203	0.634772	1	CsaV3_3G003480/CsaV3_1G043430/CsaV3_7G032480/CsaV3_6G005980/CsaV3_5G024400	CsaV3_3G003480/CsaV3_1G043430/CsaV3_7G032480/CsaV3_6G005980/CsaV3_5G024400	csv:101208016/csv:101218054/csv:101206113/csv:101218942/csv:101205809	5	2	CsaV3_1G043430/CsaV3_6G005980	3	CsaV3_3G003480/CsaV3_7G032480/CsaV3_5G024400
csv00590	Arachidonic acid metabolism	3/964	14/4203	0.655717	1	CsaV3_6G045790/CsaV3_4G003180/CsaV3_5G030140	CsaV3_6G045790/CsaV3_4G003180/CsaV3_5G030140	csv:101214973/csv:101213073/csv:101215260	3	1	CsaV3_5G030140	2	CsaV3_6G045790/CsaV3_4G003180
csv00740	Riboflavin metabolism	3/964	14/4203	0.655717	1	CsaV3_6G000480/CsaV3_6G013000/CsaV3_2G001510	CsaV3_6G000480/CsaV3_6G013000/CsaV3_2G001510	csv:101202904/csv:105435790/csv:101204456	3	2	CsaV3_6G013000/CsaV3_2G001510	1	CsaV3_6G000480
csv00905	Brassinosteroid biosynthesis	3/964	14/4203	0.655717	1	CsaV3_3G030690/CsaV3_3G034190/CsaV3_5G010070	CsaV3_3G030690/CsaV3_3G034190/CsaV3_5G010070	csv:101203328/csv:101217020/csv:101216594	3	0		3	CsaV3_3G030690/CsaV3_3G034190/CsaV3_5G010070
csv04070	Phosphatidylinositol signaling system	12/964	56/4203	0.657669	1	CsaV3_3G015240/CsaV3_7G021690/CsaV3_2G013830/CsaV3_2G015040/CsaV3_6G048460/CsaV3_1G017150/CsaV3_2G036580/CsaV3_6G037410/CsaV3_2G030590/CsaV3_3G041100/CsaV3_6G043500/CsaV3_6G012360	CsaV3_3G015240/CsaV3_7G021690/CsaV3_2G013830/CsaV3_2G015040/CsaV3_6G048460/CsaV3_1G017150/CsaV3_2G036580/CsaV3_6G037410/CsaV3_2G030590/CsaV3_3G041100/CsaV3_6G043500/CsaV3_6G012360	csv:101212685/csv:101202759/csv:101218625/csv:101205614/csv:101206261/csv:101218450/csv:101223134/csv:101215596/csv:101206636/csv:101212127/csv:101213277/csv:101210099	12	2	CsaV3_7G021690/CsaV3_6G048460	10	CsaV3_3G015240/CsaV3_2G013830/CsaV3_2G015040/CsaV3_1G017150/CsaV3_2G036580/CsaV3_6G037410/CsaV3_2G030590/CsaV3_3G041100/CsaV3_6G043500/CsaV3_6G012360
csv00760	Nicotinate and nicotinamide metabolism	4/964	19/4203	0.66517	1	CsaV3_6G040600/CsaV3_6G034080/CsaV3_2G001510/CsaV3_3G034830	CsaV3_6G040600/CsaV3_6G034080/CsaV3_2G001510/CsaV3_3G034830	csv:101211263/csv:101204002/csv:101204456/csv:101205253	4	4	CsaV3_6G040600/CsaV3_6G034080/CsaV3_2G001510/CsaV3_3G034830	0
csv00640	Propanoate metabolism	8/964	38/4203	0.671004	1	CsaV3_6G028580/CsaV3_1G043650/CsaV3_6G000070/CsaV3_3G020130/CsaV3_5G021900/CsaV3_UNG218460/CsaV3_UNG144110/CsaV3_1G046130	CsaV3_6G028580/CsaV3_1G043650/CsaV3_6G000070/CsaV3_3G020130/CsaV3_5G021900/CsaV3_UNG218460/CsaV3_UNG144110/CsaV3_1G046130	csv:101221248/csv:101222552/csv:101207718/csv:101203579/csv:101222352/csv:101218159/csv:101218159/csv:101205111	8	5	CsaV3_6G028580/CsaV3_6G000070/CsaV3_5G021900/CsaV3_UNG144110/CsaV3_1G046130	3	CsaV3_1G043650/CsaV3_3G020130/CsaV3_UNG218460
csv00230	Purine metabolism	18/964	84/4203	0.671662	1	CsaV3_2G003460/CsaV3_5G035210/CsaV3_UNG227950/CsaV3_1G009350/CsaV3_5G003450/CsaV3_3G013810/CsaV3_4G000200/CsaV3_1G012190/CsaV3_6G019130/CsaV3_6G053020/CsaV3_4G011640/CsaV3_4G000040/CsaV3_3G011290/CsaV3_3G027630/CsaV3_2G032170/CsaV3_5G028300/CsaV3_3G043250/CsaV3_2G001510	CsaV3_2G003460/CsaV3_5G035210/CsaV3_UNG227950/CsaV3_1G009350/CsaV3_5G003450/CsaV3_3G013810/CsaV3_4G000200/CsaV3_1G012190/CsaV3_6G019130/CsaV3_6G053020/CsaV3_4G011640/CsaV3_4G000040/CsaV3_3G011290/CsaV3_3G027630/CsaV3_2G032170/CsaV3_5G028300/CsaV3_3G043250/CsaV3_2G001510	csv:101203230/csv:101206975/csv:101220616/csv:101212831/csv:101208090/csv:101212920/csv:101213954/csv:101208006/csv:101218429/csv:101206974/csv:101212263/csv:101220786/csv:101218429/csv:101222416/csv:101215432/csv:101218883/csv:101204776/csv:101204456	18	6	CsaV3_5G035210/CsaV3_1G009350/CsaV3_2G032170/CsaV3_5G028300/CsaV3_3G043250/CsaV3_2G001510	12	CsaV3_2G003460/CsaV3_UNG227950/CsaV3_5G003450/CsaV3_3G013810/CsaV3_4G000200/CsaV3_1G012190/CsaV3_6G019130/CsaV3_6G053020/CsaV3_4G011640/CsaV3_4G000040/CsaV3_3G011290/CsaV3_3G027630
csv00790	Folate biosynthesis	5/964	25/4203	0.711578	1	CsaV3_3G021950/CsaV3_6G051460/CsaV3_4G033040/CsaV3_4G037860/CsaV3_5G030140	CsaV3_3G021950/CsaV3_6G051460/CsaV3_4G033040/CsaV3_4G037860/CsaV3_5G030140	csv:101208344/csv:101207464/csv:101206873/csv:101210375/csv:101215260	5	2	CsaV3_6G051460/CsaV3_5G030140	3	CsaV3_3G021950/CsaV3_4G033040/CsaV3_4G037860
csv00620	Pyruvate metabolism	18/964	86/4203	0.712603	1	CsaV3_6G039890/CsaV3_3G005000/novel.1174/CsaV3_6G028390/CsaV3_3G013930/CsaV3_6G000070/CsaV3_3G007460/CsaV3_3G015070/CsaV3_UNG009100/CsaV3_7G005670/CsaV3_4G000590/CsaV3_1G039740/CsaV3_4G000040/CsaV3_3G020130/novel.575/CsaV3_5G021900/CsaV3_5G035850/CsaV3_3G048280	CsaV3_6G039890/CsaV3_3G005000/-/CsaV3_6G028390/CsaV3_3G013930/CsaV3_6G000070/CsaV3_3G007460/CsaV3_3G015070/CsaV3_UNG009100/CsaV3_7G005670/CsaV3_4G000590/CsaV3_1G039740/CsaV3_4G000040/CsaV3_3G020130/-/CsaV3_5G021900/CsaV3_5G035850/CsaV3_3G048280	csv:101221855/csv:101203268/csv:101212275/csv:101214377/csv:101214608/csv:101207718/csv:101221189/csv:101209903/csv:101212275/csv:101208202/csv:101208672/csv:101219936/csv:101220786/csv:101203579/csv:101212275/csv:101222352/csv:101211170/csv:101222382	18	9	novel.1174/CsaV3_3G013930/CsaV3_6G000070/CsaV3_3G007460/CsaV3_7G005670/novel.575/CsaV3_5G021900/CsaV3_5G035850/CsaV3_3G048280	9	CsaV3_6G039890/CsaV3_3G005000/CsaV3_6G028390/CsaV3_3G015070/CsaV3_UNG009100/CsaV3_4G000590/CsaV3_1G039740/CsaV3_4G000040/CsaV3_3G020130
csv00960	Tropane, piperidine and pyridine alkaloid biosynthesis	4/964	21/4203	0.744437	1	CsaV3_7G022600/CsaV3_5G003790/CsaV3_1G001170/CsaV3_3G034610	CsaV3_7G022600/CsaV3_5G003790/CsaV3_1G001170/CsaV3_3G034610	csv:101210998/csv:101213059/csv:101204200/csv:101206201	4	1	CsaV3_3G034610	3	CsaV3_7G022600/CsaV3_5G003790/CsaV3_1G001170
csv02010	ABC transporters	4/964	21/4203	0.744437	1	CsaV3_6G051320/CsaV3_7G034210/CsaV3_3G048950/CsaV3_6G052240	CsaV3_6G051320/CsaV3_7G034210/CsaV3_3G048950/CsaV3_6G052240	csv:101210649/csv:101212792/csv:101219304/csv:101209905	4	2	CsaV3_6G051320/CsaV3_3G048950	2	CsaV3_7G034210/CsaV3_6G052240
csv00100	Steroid biosynthesis	5/964	26/4203	0.745422	1	CsaV3_4G035350/CsaV3_7G033590/CsaV3_3G036770/CsaV3_3G027160/CsaV3_7G033720	CsaV3_4G035350/CsaV3_7G033590/CsaV3_3G036770/CsaV3_3G027160/CsaV3_7G033720	csv:101204949/csv:101217431/csv:101207322/csv:101217446/csv:101215997	5	1	CsaV3_3G027160	4	CsaV3_4G035350/CsaV3_7G033590/CsaV3_3G036770/CsaV3_7G033720
csv00950	Isoquinoline alkaloid biosynthesis	3/964	16/4203	0.746858	1	CsaV3_7G022600/CsaV3_5G003790/CsaV3_1G001170	CsaV3_7G022600/CsaV3_5G003790/CsaV3_1G001170	csv:101210998/csv:101213059/csv:101204200	3	0		3	CsaV3_7G022600/CsaV3_5G003790/CsaV3_1G001170
csv00220	Arginine biosynthesis	7/964	36/4203	0.751745	1	CsaV3_5G031200/CsaV3_3G044050/CsaV3_5G031220/CsaV3_1G000670/CsaV3_3G013840/CsaV3_2G031570/CsaV3_3G031010	CsaV3_5G031200/CsaV3_3G044050/CsaV3_5G031220/CsaV3_1G000670/CsaV3_3G013840/CsaV3_2G031570/CsaV3_3G031010	csv:101213570/csv:101207765/csv:101220645/csv:101215982/csv:101212441/csv:101203871/csv:101207254	7	6	CsaV3_5G031200/CsaV3_3G044050/CsaV3_5G031220/CsaV3_1G000670/CsaV3_2G031570/CsaV3_3G031010	1	CsaV3_3G013840
csv00310	Lysine degradation	5/964	27/4203	0.776236	1	CsaV3_5G023260/CsaV3_6G028580/CsaV3_7G005590/CsaV3_6G000070/CsaV3_3G027790	CsaV3_5G023260/CsaV3_6G028580/CsaV3_7G005590/CsaV3_6G000070/CsaV3_3G027790	csv:101220194/csv:101221248/csv:101217644/csv:101207718/csv:101204477	5	4	CsaV3_5G023260/CsaV3_6G028580/CsaV3_7G005590/CsaV3_6G000070	1	CsaV3_3G027790
csv04933	AGE-RAGE signaling pathway in diabetic complications	2/964	841489	0.799832	1	CsaV3_2G034580/CsaV3_6G050550	CsaV3_2G034580/CsaV3_6G050550	csv:101220160/csv:101218591	2	2	CsaV3_2G034580/CsaV3_6G050550	0
csv00062	Fatty acid elongation	4/964	23/4203	0.808532	1	CsaV3_6G022170/CsaV3_3G012730/CsaV3_5G004490/CsaV3_4G036210	CsaV3_6G022170/CsaV3_3G012730/CsaV3_5G004490/CsaV3_4G036210	csv:101212013/csv:101219531/csv:101222043/csv:101217359	4	2	CsaV3_5G004490/CsaV3_4G036210	2	CsaV3_6G022170/CsaV3_3G012730
csv04130	SNARE interactions in vesicular transport	6/964	35/4203	0.847029	1	CsaV3_3G047800/CsaV3_3G030880/CsaV3_3G038070/CsaV3_5G038260/CsaV3_5G008990/CsaV3_7G021020	CsaV3_3G047800/CsaV3_3G030880/CsaV3_3G038070/CsaV3_5G038260/CsaV3_5G008990/CsaV3_7G021020	csv:101207709/csv:101208227/csv:101208931/csv:101222163/csv:101213786/csv:101208669	6	3	CsaV3_5G038260/CsaV3_5G008990/CsaV3_7G021020	3	CsaV3_3G047800/CsaV3_3G030880/CsaV3_3G038070
csv00290	Valine, leucine and isoleucine biosynthesis	2/964	15/4203	0.890702	1	CsaV3_5G014210/CsaV3_2G025820	CsaV3_5G014210/CsaV3_2G025820	csv:101212902/csv:101214004	2	1	CsaV3_5G014210	1	CsaV3_2G025820
csv00030	Pentose phosphate pathway	8/964	48/4203	0.890717	1	CsaV3_5G034910/CsaV3_2G003650/CsaV3_2G004240/CsaV3_7G021470/CsaV3_6G048080/CsaV3_3G023460/CsaV3_5G028300/CsaV3_7G006840	CsaV3_5G034910/CsaV3_2G003650/CsaV3_2G004240/CsaV3_7G021470/CsaV3_6G048080/CsaV3_3G023460/CsaV3_5G028300/CsaV3_7G006840	csv:101211316/csv:101208699/csv:101221375/csv:101219476/csv:101211230/csv:101220704/csv:101218883/csv:101206118	8	3	CsaV3_7G021470/CsaV3_5G028300/CsaV3_7G006840	5	CsaV3_5G034910/CsaV3_2G003650/CsaV3_2G004240/CsaV3_6G048080/CsaV3_3G023460
csv00240	Pyrimidine metabolism	8/964	48/4203	0.890717	1	CsaV3_6G040600/CsaV3_1G009350/CsaV3_3G004920/CsaV3_6G038890/CsaV3_3G027630/CsaV3_2G001510/CsaV3_7G021480/CsaV3_6G006570	CsaV3_6G040600/CsaV3_1G009350/CsaV3_3G004920/CsaV3_6G038890/CsaV3_3G027630/CsaV3_2G001510/CsaV3_7G021480/CsaV3_6G006570	csv:101211263/csv:101212831/csv:101220705/csv:101204944/csv:101222416/csv:101204456/csv:101219714/csv:101223081	8	5	CsaV3_6G040600/CsaV3_1G009350/CsaV3_3G004920/CsaV3_2G001510/CsaV3_7G021480	3	CsaV3_6G038890/CsaV3_3G027630/CsaV3_6G006570
csv03410	Base excision repair	5/964	33/4203	0.904463	1	CsaV3_6G015040/CsaV3_3G044900/CsaV3_4G033030/CsaV3_6G016510/CsaV3_6G013350	CsaV3_6G015040/CsaV3_3G044900/CsaV3_4G033030/CsaV3_6G016510/CsaV3_6G013350	csv:101203672/csv:101206397/csv:101202933/csv:101208473/csv:101218536	5	1	CsaV3_6G013350	4	CsaV3_6G015040/CsaV3_3G044900/CsaV3_4G033030/CsaV3_6G016510
csv04141	Protein processing in endoplasmic reticulum	31/964	166/4203	0.925807	1	CsaV3_7G004390/CsaV3_3G012670/CsaV3_4G032990/CsaV3_6G024080/CsaV3_5G036070/CsaV3_3G034400/CsaV3_3G000340/CsaV3_6G007640/CsaV3_4G025700/CsaV3_3G034210/CsaV3_1G007480/CsaV3_6G017300/CsaV3_7G029920/CsaV3_5G008690/CsaV3_3G027480/CsaV3_5G030370/CsaV3_7G029830/CsaV3_1G035810/CsaV3_5G008760/CsaV3_4G001560/CsaV3_6G003940/CsaV3_1G035820/CsaV3_2G029630/CsaV3_1G012230/CsaV3_4G002420/CsaV3_5G001960/CsaV3_2G0…	CsaV3_7G004390/CsaV3_3G012670/CsaV3_4G032990/CsaV3_6G024080/CsaV3_5G036070/CsaV3_3G034400/CsaV3_3G000340/CsaV3_6G007640/CsaV3_4G025700/CsaV3_3G034210/CsaV3_1G007480/CsaV3_6G017300/CsaV3_7G029920/CsaV3_5G008690/CsaV3_3G027480/CsaV3_5G030370/CsaV3_7G029830/CsaV3_1G035810/CsaV3_5G008760/CsaV3_4G001560/CsaV3_6G003940/CsaV3_1G035820/CsaV3_2G029630/CsaV3_1G012230/CsaV3_4G002420/CsaV3_5G001960/CsaV3_2G0…	csv:101206023/csv:101216851/csv:101206157/csv:101210044/csv:101209121/csv:101221835/csv:101203166/csv:105434386/csv:101214749/csv:101217492/csv:101206027/csv:101216323/csv:101221276/csv:101217071/csv:101210531/csv:101210818/csv:101222860/csv:101204666/csv:101211939/csv:101210969/csv:101207000/csv:101204421/csv:101203607/csv:101208731/csv:101203114/csv:101207505/csv:101206127/csv:101212004/csv:101…	31	5	CsaV3_7G004390/CsaV3_3G000340/CsaV3_6G017300/CsaV3_7G029920/CsaV3_2G032800	26	CsaV3_3G012670/CsaV3_4G032990/CsaV3_6G024080/CsaV3_5G036070/CsaV3_3G034400/CsaV3_6G007640/CsaV3_4G025700/CsaV3_3G034210/CsaV3_1G007480/CsaV3_5G008690/CsaV3_3G027480/CsaV3_5G030370/CsaV3_7G029830/CsaV3_1G035810/CsaV3_5G008760/CsaV3_4G001560/CsaV3_6G003940/CsaV3_1G035820/CsaV3_2G029630/CsaV3_1G012230/CsaV3_4G002420/CsaV3_5G001960/CsaV3_3G019150/CsaV3_2G028400/CsaV3_1G009720/CsaV3_1G009950
csv00300	Lysine biosynthesis	1/964	841428	0.926357	1	CsaV3_2G033650	CsaV3_2G033650	csv:101216470	1	0		1	CsaV3_2G033650
csv00340	Histidine metabolism	2/964	17/4203	0.928134	1	CsaV3_6G005330/CsaV3_2G015040	CsaV3_6G005330/CsaV3_2G015040	csv:101204289/csv:101205614	2	1	CsaV3_6G005330	1	CsaV3_2G015040
csv01210	2-Oxocarboxylic acid metabolism	7/964	46/4203	0.929339	1	novel.202/CsaV3_5G031200/CsaV3_5G031220/CsaV3_5G014210/CsaV3_2G031570/CsaV3_2G025820/CsaV3_3G031010	-/CsaV3_5G031200/CsaV3_5G031220/CsaV3_5G014210/CsaV3_2G031570/CsaV3_2G025820/CsaV3_3G031010	csv:101210312/csv:101213570/csv:101220645/csv:101212902/csv:101203871/csv:101214004/csv:101207254	7	5	CsaV3_5G031200/CsaV3_5G031220/CsaV3_5G014210/CsaV3_2G031570/CsaV3_3G031010	2	novel.202/CsaV3_2G025820
csv03022	Basal transcription factors	5/964	35/4203	0.929854	1	CsaV3_7G029840/CsaV3_3G049350/CsaV3_6G039860/novel.260/CsaV3_1G041520	CsaV3_7G029840/CsaV3_3G049350/CsaV3_6G039860/-/CsaV3_1G041520	csv:101223096/csv:101206316/csv:101222808/csv:101207087/csv:101216807	5	4	CsaV3_7G029840/CsaV3_3G049350/novel.260/CsaV3_1G041520	1	CsaV3_6G039860
csv04120	Ubiquitin mediated proteolysis	17/964	98/4203	0.930714	1	CsaV3_6G014350/CsaV3_4G007910/CsaV3_6G028570/CsaV3_5G036070/CsaV3_2G026140/CsaV3_6G017300/CsaV3_3G008830/CsaV3_6G040090/CsaV3_4G033720/CsaV3_5G025240/novel.1170/CsaV3_7G028740/CsaV3_3G032410/CsaV3_6G050140/CsaV3_6G020210/CsaV3_3G046770/CsaV3_5G036660	CsaV3_6G014350/CsaV3_4G007910/CsaV3_6G028570/CsaV3_5G036070/CsaV3_2G026140/CsaV3_6G017300/CsaV3_3G008830/CsaV3_6G040090/CsaV3_4G033720/CsaV3_5G025240/-/CsaV3_7G028740/CsaV3_3G032410/CsaV3_6G050140/CsaV3_6G020210/CsaV3_3G046770/CsaV3_5G036660	csv:101221553/csv:101214623/csv:101221014/csv:101209121/csv:101209203/csv:101216323/csv:101221190/csv:101203488/csv:101219881/csv:101206294/csv:101218340/csv:101215815/csv:101208421/csv:101204759/csv:101218340/csv:101203062/csv:101205198	17	7	CsaV3_6G028570/CsaV3_2G026140/CsaV3_6G017300/CsaV3_3G008830/CsaV3_4G033720/CsaV3_5G025240/novel.1170	10	CsaV3_6G014350/CsaV3_4G007910/CsaV3_5G036070/CsaV3_6G040090/CsaV3_7G028740/CsaV3_3G032410/CsaV3_6G050140/CsaV3_6G020210/CsaV3_3G046770/CsaV3_5G036660
csv03020	RNA polymerase	6/964	41/4203	0.934094	1	CsaV3_2G024730/CsaV3_3G003760/CsaV3_UNG208330/CsaV3_4G005180/CsaV3_2G032780/CsaV3_4G004830	CsaV3_2G024730/CsaV3_3G003760/CsaV3_UNG208330/CsaV3_4G005180/CsaV3_2G032780/CsaV3_4G004830	csv:101206603/csv:101208578/csv:3429302/csv:101212587/csv:101206603/csv:101207932	6	4	CsaV3_3G003760/CsaV3_UNG208330/CsaV3_4G005180/CsaV3_4G004830	2	CsaV3_2G024730/CsaV3_2G032780
csv00510	N-Glycan biosynthesis	6/964	42/4203	0.94326	1	CsaV3_5G027050/CsaV3_1G007480/CsaV3_7G002510/CsaV3_5G031040/CsaV3_5G030370/CsaV3_1G039140	CsaV3_5G027050/CsaV3_1G007480/CsaV3_7G002510/CsaV3_5G031040/CsaV3_5G030370/CsaV3_1G039140	csv:101220682/csv:101206027/csv:101213679/csv:101222690/csv:101210818/csv:101210410	6	2	CsaV3_5G027050/CsaV3_1G039140	4	CsaV3_1G007480/CsaV3_7G002510/CsaV3_5G031040/CsaV3_5G030370
csv00280	Valine, leucine and isoleucine degradation	7/964	48/4203	0.946782	1	CsaV3_6G028580/CsaV3_4G026970/CsaV3_1G043650/CsaV3_2G001870/CsaV3_6G000070/CsaV3_6G038810/CsaV3_2G025820	CsaV3_6G028580/CsaV3_4G026970/CsaV3_1G043650/CsaV3_2G001870/CsaV3_6G000070/CsaV3_6G038810/CsaV3_2G025820	csv:101221248/csv:101210304/csv:101222552/csv:101217826/csv:101207718/csv:101203798/csv:101214004	7	4	CsaV3_6G028580/CsaV3_4G026970/CsaV3_6G000070/CsaV3_6G038810	3	CsaV3_1G043650/CsaV3_2G001870/CsaV3_2G025820
csv00380	Tryptophan metabolism	5/964	38/4203	0.956736	1	CsaV3_2G031080/CsaV3_6G028580/CsaV3_1G039020/CsaV3_6G000070/CsaV3_7G000850	CsaV3_2G031080/CsaV3_6G028580/CsaV3_1G039020/CsaV3_6G000070/CsaV3_7G000850	csv:101203913/csv:101221248/csv:101209171/csv:101207718/csv:101205749	5	4	CsaV3_2G031080/CsaV3_6G028580/CsaV3_1G039020/CsaV3_6G000070	1	CsaV3_7G000850
csv03420	Nucleotide excision repair	7/964	50/4203	0.960281	1	CsaV3_6G046400/CsaV3_2G026140/CsaV3_4G033030/CsaV3_6G016510/CsaV3_1G031640/CsaV3_6G012270/CsaV3_6G034260	CsaV3_6G046400/CsaV3_2G026140/CsaV3_4G033030/CsaV3_6G016510/CsaV3_1G031640/CsaV3_6G012270/CsaV3_6G034260	csv:101218071/csv:101209203/csv:101202933/csv:101208473/csv:101219981/csv:101212709/csv:101217230	7	1	CsaV3_2G026140	6	CsaV3_6G046400/CsaV3_4G033030/CsaV3_6G016510/CsaV3_1G031640/CsaV3_6G012270/CsaV3_6G034260
csv00750	Vitamin B6 metabolism	1/964	13/4203	0.966375	1	CsaV3_2G001290	CsaV3_2G001290	csv:101208070	1	0		1	CsaV3_2G001290
csv03018	RNA degradation	15/964	95/4203	0.968427	1	CsaV3_4G012100/CsaV3_6G038490/CsaV3_1G035960/CsaV3_6G048080/CsaV3_3G036430/CsaV3_1G001380/CsaV3_3G023460/CsaV3_7G024630/CsaV3_1G017330/CsaV3_6G009310/CsaV3_1G042970/CsaV3_5G006110/CsaV3_5G034720/CsaV3_6G016720/CsaV3_4G037800	CsaV3_4G012100/CsaV3_6G038490/CsaV3_1G035960/CsaV3_6G048080/CsaV3_3G036430/CsaV3_1G001380/CsaV3_3G023460/CsaV3_7G024630/CsaV3_1G017330/CsaV3_6G009310/CsaV3_1G042970/CsaV3_5G006110/CsaV3_5G034720/CsaV3_6G016720/CsaV3_4G037800	csv:101222268/csv:101219801/csv:101205451/csv:101211230/csv:101203793/csv:101207820/csv:101220704/csv:101203991/csv:101221637/csv:101203071/csv:101215027/csv:101205035/csv:101208774/csv:101204960/csv:101220693	15	6	CsaV3_1G035960/CsaV3_7G024630/CsaV3_6G009310/CsaV3_1G042970/CsaV3_5G006110/CsaV3_5G034720	9	CsaV3_4G012100/CsaV3_6G038490/CsaV3_6G048080/CsaV3_3G036430/CsaV3_1G001380/CsaV3_3G023460/CsaV3_1G017330/CsaV3_6G016720/CsaV3_4G037800
csv00020	Citrate cycle (TCA cycle)	6/964	48/4203	0.977974	1	CsaV3_6G028390/CsaV3_6G000070/CsaV3_3G007460/CsaV3_6G031980/CsaV3_5G007980/CsaV3_3G048280	CsaV3_6G028390/CsaV3_6G000070/CsaV3_3G007460/CsaV3_6G031980/CsaV3_5G007980/CsaV3_3G048280	csv:101214377/csv:101207718/csv:101221189/csv:101209539/csv:101222022/csv:101222382	6	5	CsaV3_6G000070/CsaV3_3G007460/CsaV3_6G031980/CsaV3_5G007980/CsaV3_3G048280	1	CsaV3_6G028390
csv03060	Protein export	5/964	43/4203	0.98153	1	CsaV3_4G032990/CsaV3_2G025100/CsaV3_4G033950/CsaV3_5G001960/CsaV3_1G009720	CsaV3_4G032990/CsaV3_2G025100/CsaV3_4G033950/CsaV3_5G001960/CsaV3_1G009720	csv:101206157/csv:101205346/csv:101221060/csv:101207505/csv:101220011	5	1	CsaV3_2G025100	4	CsaV3_4G032990/CsaV3_4G033950/CsaV3_5G001960/CsaV3_1G009720
csv03008	Ribosome biogenesis in eukaryotes	11/964	82/4203	0.98986	1	novel.634/CsaV3_UNG073590/CsaV3_6G044000/CsaV3_4G006310/CsaV3_7G027900/CsaV3_6G043900/CsaV3_2G009090/CsaV3_1G015690/CsaV3_UNG219500/CsaV3_6G042250/CsaV3_3G035590	-/CsaV3_UNG073590/CsaV3_6G044000/CsaV3_4G006310/CsaV3_7G027900/CsaV3_6G043900/CsaV3_2G009090/CsaV3_1G015690/CsaV3_UNG219500/CsaV3_6G042250/CsaV3_3G035590	csv:101221716/csv:101217384/csv:101205903/csv:101208103/csv:101222973/csv:101207095/csv:101216698/csv:101216227/csv:101217384/csv:101208150/csv:101212457	11	10	novel.634/CsaV3_UNG073590/CsaV3_6G044000/CsaV3_4G006310/CsaV3_7G027900/CsaV3_6G043900/CsaV3_2G009090/CsaV3_1G015690/CsaV3_6G042250/CsaV3_3G035590	1	CsaV3_UNG219500
csv03013	RNA transport	22/964	145/4203	0.993044	1	CsaV3_5G012490/CsaV3_2G010940/CsaV3_1G037250/CsaV3_7G021830/CsaV3_3G013520/CsaV3_4G009380/CsaV3_3G036430/CsaV3_1G037230/CsaV3_6G052120/CsaV3_4G036460/CsaV3_7G027560/CsaV3_5G015740/CsaV3_6G009050/CsaV3_2G036420/CsaV3_7G024030/CsaV3_4G006310/CsaV3_5G024750/CsaV3_1G040360/CsaV3_3G039820/CsaV3_4G004840/CsaV3_5G000410/CsaV3_3G035590	CsaV3_5G012490/CsaV3_2G010940/CsaV3_1G037250/CsaV3_7G021830/CsaV3_3G013520/CsaV3_4G009380/CsaV3_3G036430/CsaV3_1G037230/CsaV3_6G052120/CsaV3_4G036460/CsaV3_7G027560/CsaV3_5G015740/CsaV3_6G009050/CsaV3_2G036420/CsaV3_7G024030/CsaV3_4G006310/CsaV3_5G024750/CsaV3_1G040360/CsaV3_3G039820/CsaV3_4G004840/CsaV3_5G000410/CsaV3_3G035590	csv:101220434/csv:101202754/csv:101215735/csv:101202908/csv:101208192/csv:101222187/csv:101203793/csv:101209344/csv:101219057/csv:101211356/csv:101217528/csv:101212476/csv:101215672/csv:101218722/csv:101213144/csv:101208103/csv:101204684/csv:101209997/csv:101210745/csv:101213308/csv:101203580/csv:101212457	22	15	CsaV3_5G012490/CsaV3_2G010940/CsaV3_1G037250/CsaV3_3G013520/CsaV3_4G009380/CsaV3_1G037230/CsaV3_4G036460/CsaV3_7G027560/CsaV3_5G015740/CsaV3_6G009050/CsaV3_2G036420/CsaV3_7G024030/CsaV3_4G006310/CsaV3_4G004840/CsaV3_3G035590	7	CsaV3_7G021830/CsaV3_3G036430/CsaV3_6G052120/CsaV3_5G024750/CsaV3_1G040360/CsaV3_3G039820/CsaV3_5G000410
csv00190	Oxidative phosphorylation	20/964	142/4203	0.99733	1	CsaV3_3G047070/CsaV3_6G046410/CsaV3_2G031420/CsaV3_4G024730/CsaV3_2G029210/CsaV3_6G025260/CsaV3_6G008400/CsaV3_6G025300/CsaV3_2G008520/CsaV3_3G005120/CsaV3_6G007320/CsaV3_2G003510/CsaV3_1G007980/CsaV3_UNG208560/CsaV3_1G015770/CsaV3_UNG209980/CsaV3_UNG065510/CsaV3_5G024920/CsaV3_3G041630/CsaV3_2G032160	CsaV3_3G047070/CsaV3_6G046410/CsaV3_2G031420/CsaV3_4G024730/CsaV3_2G029210/CsaV3_6G025260/CsaV3_6G008400/CsaV3_6G025300/CsaV3_2G008520/CsaV3_3G005120/CsaV3_6G007320/CsaV3_2G003510/CsaV3_1G007980/CsaV3_UNG208560/CsaV3_1G015770/CsaV3_UNG209980/CsaV3_UNG065510/CsaV3_5G024920/CsaV3_3G041630/CsaV3_2G032160	csv:101219224/csv:101222890/csv:101213505/csv:101217432/csv:101209817/csv:11123862/csv:101214636/csv:11123862/csv:101221564/csv:101214682/csv:101207411/csv:101214655/csv:101214920/csv:11123864/csv:101216072/csv:11123919/csv:101216072/csv:101222955/csv:101203260/csv:101215909	20	15	CsaV3_3G047070/CsaV3_6G046410/CsaV3_2G031420/CsaV3_2G029210/CsaV3_6G025260/CsaV3_6G008400/CsaV3_6G025300/CsaV3_6G007320/CsaV3_UNG208560/CsaV3_1G015770/CsaV3_UNG209980/CsaV3_UNG065510/CsaV3_5G024920/CsaV3_3G041630/CsaV3_2G032160	5	CsaV3_4G024730/CsaV3_2G008520/CsaV3_3G005120/CsaV3_2G003510/CsaV3_1G007980
csv03015	mRNA surveillance pathway	10/964	96/4203	0.99957	1	CsaV3_2G002500/CsaV3_2G009710/CsaV3_3G036430/CsaV3_3G032960/CsaV3_UNG051400/CsaV3_6G040010/CsaV3_5G024750/CsaV3_1G037370/CsaV3_4G004840/CsaV3_6G007620	CsaV3_2G002500/CsaV3_2G009710/CsaV3_3G036430/CsaV3_3G032960/CsaV3_UNG051400/CsaV3_6G040010/CsaV3_5G024750/CsaV3_1G037370/CsaV3_4G004840/CsaV3_6G007620	csv:101206275/csv:101220950/csv:101203793/csv:101213262/csv:101217028/csv:101203247/csv:101204684/csv:101215977/csv:101213308/csv:101203556	10	5	CsaV3_2G002500/CsaV3_UNG051400/CsaV3_6G040010/CsaV3_4G004840/CsaV3_6G007620	5	CsaV3_2G009710/CsaV3_3G036430/CsaV3_3G032960/CsaV3_5G024750/CsaV3_1G037370
csv04144	Endocytosis	18/964	148/4203	0.999761	1	CsaV3_4G003850/CsaV3_3G003480/CsaV3_3G018320/CsaV3_2G006740/CsaV3_4G002260/CsaV3_6G022210/CsaV3_2G016000/CsaV3_7G032480/CsaV3_5G003600/CsaV3_5G008040/CsaV3_2G002330/CsaV3_1G007430/CsaV3_6G037410/CsaV3_6G003390/CsaV3_3G020580/CsaV3_2G017730/CsaV3_7G033070/CsaV3_6G005980	CsaV3_4G003850/CsaV3_3G003480/CsaV3_3G018320/CsaV3_2G006740/CsaV3_4G002260/CsaV3_6G022210/CsaV3_2G016000/CsaV3_7G032480/CsaV3_5G003600/CsaV3_5G008040/CsaV3_2G002330/CsaV3_1G007430/CsaV3_6G037410/CsaV3_6G003390/CsaV3_3G020580/CsaV3_2G017730/CsaV3_7G033070/CsaV3_6G005980	csv:101205627/csv:101208016/csv:101220748/csv:101209871/csv:101203435/csv:101211533/csv:101218079/csv:101206113/csv:101209471/csv:101205838/csv:101210509/csv:101211239/csv:101215596/csv:101211044/csv:105434874/csv:101212418/csv:101208671/csv:101218942	18	5	CsaV3_4G003850/CsaV3_4G002260/CsaV3_5G003600/CsaV3_7G033070/CsaV3_6G005980	13	CsaV3_3G003480/CsaV3_3G018320/CsaV3_2G006740/CsaV3_6G022210/CsaV3_2G016000/CsaV3_7G032480/CsaV3_5G008040/CsaV3_2G002330/CsaV3_1G007430/CsaV3_6G037410/CsaV3_6G003390/CsaV3_3G020580/CsaV3_2G017730
csv00970	Aminoacyl-tRNA biosynthesis	3/964	51/4203	0.999794	1	CsaV3_2G016280/CsaV3_5G014470/CsaV3_4G036250	CsaV3_2G016280/CsaV3_5G014470/CsaV3_4G036250	csv:101222339/csv:101203149/csv:101211267	3	0		3	CsaV3_2G016280/CsaV3_5G014470/CsaV3_4G036250
csv03050	Proteasome	2/964	48/4203	0.999947	1	CsaV3_3G000720/CsaV3_1G038720	CsaV3_3G000720/CsaV3_1G038720	csv:101217295/csv:101222535	2	2	CsaV3_3G000720/CsaV3_1G038720	0
csv03040	Spliceosome	18/964	159/4203	0.999956	1	CsaV3_4G021980/CsaV3_1G045340/novel.554/CsaV3_UNG075590/CsaV3_2G009900/CsaV3_4G037710/CsaV3_3G044470/CsaV3_1G017170/CsaV3_5G031610/CsaV3_2G007640/CsaV3_1G043660/CsaV3_7G024630/CsaV3_2G006940/CsaV3_2G003560/CsaV3_4G004840/CsaV3_6G047540/CsaV3_5G024370/CsaV3_3G038940	CsaV3_4G021980/CsaV3_1G045340/-/CsaV3_UNG075590/CsaV3_2G009900/CsaV3_4G037710/CsaV3_3G044470/CsaV3_1G017170/CsaV3_5G031610/CsaV3_2G007640/CsaV3_1G043660/CsaV3_7G024630/CsaV3_2G006940/CsaV3_2G003560/CsaV3_4G004840/CsaV3_6G047540/CsaV3_5G024370/CsaV3_3G038940	csv:101219553/csv:101205030/csv:101206265/csv:101221493/csv:101205774/csv:101208972/csv:101216112/csv:101218920/csv:101214372/csv:101217519/csv:101222791/csv:101203991/csv:101206387/csv:101210594/csv:101213308/csv:101217009/csv:101211337/csv:101203064	18	11	CsaV3_4G021980/CsaV3_1G045340/novel.554/CsaV3_UNG075590/CsaV3_2G009900/CsaV3_1G017170/CsaV3_2G007640/CsaV3_7G024630/CsaV3_2G003560/CsaV3_4G004840/CsaV3_5G024370	7	CsaV3_4G037710/CsaV3_3G044470/CsaV3_5G031610/CsaV3_1G043660/CsaV3_2G006940/CsaV3_6G047540/CsaV3_3G038940
csv03010	Ribosome	31/964	280/4203	1	1	novel.376/CsaV3_UNG232200/novel.992/CsaV3_3G031960/CsaV3_1G042100/CsaV3_UNG209180/novel.917/CsaV3_6G045270/CsaV3_2G026730/CsaV3_6G017200/CsaV3_5G010420/CsaV3_5G029770/CsaV3_3G015350/CsaV3_7G021070/CsaV3_3G004770/CsaV3_3G037470/CsaV3_5G017420/CsaV3_UNG013130/CsaV3_3G002360/CsaV3_6G040520/CsaV3_4G007890/CsaV3_2G013050/CsaV3_6G002260/CsaV3_2G032240/CsaV3_4G033460/CsaV3_3G015690/CsaV3_7G031330/CsaV3_…	-/CsaV3_UNG232200/-/CsaV3_3G031960/CsaV3_1G042100/CsaV3_UNG209180/-/CsaV3_6G045270/CsaV3_2G026730/CsaV3_6G017200/CsaV3_5G010420/CsaV3_5G029770/CsaV3_3G015350/CsaV3_7G021070/CsaV3_3G004770/CsaV3_3G037470/CsaV3_5G017420/CsaV3_UNG013130/CsaV3_3G002360/CsaV3_6G040520/CsaV3_4G007890/CsaV3_2G013050/CsaV3_6G002260/CsaV3_2G032240/CsaV3_4G033460/CsaV3_3G015690/CsaV3_7G031330/CsaV3_3G038560/CsaV3_4G031420/…	csv:101208313/csv:101209853/csv:101208313/csv:101218332/csv:101204062/csv:11123886/csv:101208313/csv:101210610/csv:101219715/csv:101217283/csv:101205050/csv:101221039/csv:101222582/csv:101215123/csv:101218568/csv:101202867/csv:101221450/csv:101205256/csv:101204872/csv:101207343/csv:101214864/csv:101216114/csv:101217730/csv:101214306/csv:101213298/csv:101207433/csv:101222777/csv:101208313/csv:1012…	31	14	novel.376/CsaV3_UNG232200/CsaV3_3G031960/CsaV3_UNG209180/CsaV3_2G026730/CsaV3_3G015350/CsaV3_7G021070/CsaV3_3G004770/CsaV3_5G017420/CsaV3_3G002360/CsaV3_6G040520/CsaV3_2G032240/CsaV3_4G033460/CsaV3_4G001000	17	novel.992/CsaV3_1G042100/novel.917/CsaV3_6G045270/CsaV3_6G017200/CsaV3_5G010420/CsaV3_5G029770/CsaV3_3G037470/CsaV3_UNG013130/CsaV3_4G007890/CsaV3_2G013050/CsaV3_6G002260/CsaV3_3G015690/CsaV3_7G031330/CsaV3_3G038560/CsaV3_4G031420/CsaV3_6G044160

## Sheet: XS_30vsCS_30DAP KEGG
KEGGID	Description	GeneRatio	BgRatio	pvalue	padj	geneID	geneName	keggID	Count	Up	Up_Gene_names	Down	Down_Gene_names
csv03008	Ribosome biogenesis in eukaryotes	61/2412	81/4184	0.000643531	0.0733625	CsaV3_3G017360/CsaV3_4G035140/CsaV3_1G000640/CsaV3_7G027900/CsaV3_4G023210/CsaV3_2G019580/CsaV3_7G021630/CsaV3_1G006340/CsaV3_UNG009110/CsaV3_7G032650/CsaV3_4G001370/CsaV3_1G043830/CsaV3_7G029310/CsaV3_1G029700/CsaV3_1G031710/CsaV3_3G040270/CsaV3_1G029790/CsaV3_1G037130/CsaV3_2G025380/CsaV3_3G006620/CsaV3_3G040290/CsaV3_6G048920/novel.950/CsaV3_4G010040/CsaV3_1G007630/CsaV3_2G002790/CsaV3_1G00068…	CsaV3_3G017360/CsaV3_4G035140/CsaV3_1G000640/CsaV3_7G027900/CsaV3_4G023210/CsaV3_2G019580/CsaV3_7G021630/CsaV3_1G006340/CsaV3_UNG009110/CsaV3_7G032650/CsaV3_4G001370/CsaV3_1G043830/CsaV3_7G029310/CsaV3_1G029700/CsaV3_1G031710/CsaV3_3G040270/CsaV3_1G029790/CsaV3_1G037130/CsaV3_2G025380/CsaV3_3G006620/CsaV3_3G040290/CsaV3_6G048920/-/CsaV3_4G010040/CsaV3_1G007630/CsaV3_2G002790/CsaV3_1G000680/CsaV3_…	csv:101213750/csv:101222880/csv:101215267/csv:101222973/csv:101219566/csv:101212091/csv:101222795/csv:101208691/csv:101217384/csv:101221748/csv:101218104/csv:101203634/csv:101207643/csv:101211465/csv:101221320/csv:101219867/csv:101211465/csv:101209097/csv:101221227/csv:101210402/csv:101220343/csv:101220805/csv:101217101/csv:101205153/csv:101208620/csv:101222939/csv:101216223/csv:101220388/csv:101…	61	11	CsaV3_4G023210/CsaV3_UNG009110/CsaV3_UNG136030/novel.634/CsaV3_7G024240/CsaV3_UNG219500/CsaV3_1G038920/CsaV3_6G043900/CsaV3_4G037990/CsaV3_UNG073590/CsaV3_6G008550	50	CsaV3_3G017360/CsaV3_4G035140/CsaV3_1G000640/CsaV3_7G027900/CsaV3_2G019580/CsaV3_7G021630/CsaV3_1G006340/CsaV3_7G032650/CsaV3_4G001370/CsaV3_1G043830/CsaV3_7G029310/CsaV3_1G029700/CsaV3_1G031710/CsaV3_3G040270/CsaV3_1G029790/CsaV3_1G037130/CsaV3_2G025380/CsaV3_3G006620/CsaV3_3G040290/CsaV3_6G048920/novel.950/CsaV3_4G010040/CsaV3_1G007630/CsaV3_2G002790/CsaV3_1G000680/CsaV3_7G028370/CsaV3_2G016400…
csv00196	Photosynthesis - antenna proteins	18/2412	20/4184	0.00190522	0.0912758	CsaV3_1G032510/CsaV3_1G043710/CsaV3_3G005950/CsaV3_6G013800/CsaV3_5G025740/CsaV3_3G031580/CsaV3_5G030270/CsaV3_1G002410/CsaV3_6G005340/CsaV3_5G039350/CsaV3_7G002620/CsaV3_6G051520/CsaV3_4G026100/CsaV3_1G005600/CsaV3_6G051530/CsaV3_1G041230/CsaV3_4G037740/CsaV3_1G019610	CsaV3_1G032510/CsaV3_1G043710/CsaV3_3G005950/CsaV3_6G013800/CsaV3_5G025740/CsaV3_3G031580/CsaV3_5G030270/CsaV3_1G002410/CsaV3_6G005340/CsaV3_5G039350/CsaV3_7G002620/CsaV3_6G051520/CsaV3_4G026100/CsaV3_1G005600/CsaV3_6G051530/CsaV3_1G041230/CsaV3_4G037740/CsaV3_1G019610	csv:101211276/csv:101202993/csv:101207278/csv:101213845/csv:101211428/csv:101203342/csv:101214055/csv:101222701/csv:101204705/csv:101218137/csv:101212963/csv:101221671/csv:101208740/csv:101218675/csv:101222687/csv:101211430/csv:101209460/csv:101204705	18	18	CsaV3_1G032510/CsaV3_1G043710/CsaV3_3G005950/CsaV3_6G013800/CsaV3_5G025740/CsaV3_3G031580/CsaV3_5G030270/CsaV3_1G002410/CsaV3_6G005340/CsaV3_5G039350/CsaV3_7G002620/CsaV3_6G051520/CsaV3_4G026100/CsaV3_1G005600/CsaV3_6G051530/CsaV3_1G041230/CsaV3_4G037740/CsaV3_1G019610	0
csv00620	Pyruvate metabolism	63/2412	87/4184	0.00288636	0.0912758	CsaV3_6G028390/CsaV3_3G023610/CsaV3_5G028880/CsaV3_5G031990/CsaV3_6G000070/CsaV3_5G035850/CsaV3_1G001600/CsaV3_3G038380/CsaV3_6G044520/CsaV3_2G030720/CsaV3_3G010370/CsaV3_6G036340/CsaV3_2G012760/CsaV3_7G028870/CsaV3_6G040330/novel.1174/CsaV3_7G024120/CsaV3_3G048280/CsaV3_3G021690/CsaV3_1G013530/CsaV3_4G002450/CsaV3_6G039890/CsaV3_3G007460/CsaV3_UNG009100/CsaV3_4G008360/CsaV3_3G043710/CsaV3_6G0083…	CsaV3_6G028390/CsaV3_3G023610/CsaV3_5G028880/CsaV3_5G031990/CsaV3_6G000070/CsaV3_5G035850/CsaV3_1G001600/CsaV3_3G038380/CsaV3_6G044520/CsaV3_2G030720/CsaV3_3G010370/CsaV3_6G036340/CsaV3_2G012760/CsaV3_7G028870/CsaV3_6G040330/-/CsaV3_7G024120/CsaV3_3G048280/CsaV3_3G021690/CsaV3_1G013530/CsaV3_4G002450/CsaV3_6G039890/CsaV3_3G007460/CsaV3_UNG009100/CsaV3_4G008360/CsaV3_3G043710/CsaV3_6G008320/CsaV3_…	csv:101214377/csv:101214108/csv:101216256/csv:101208773/csv:101207718/csv:101211170/csv:101209430/csv:101214302/csv:101219252/csv:101218724/csv:101204181/csv:101205918/csv:101204387/csv:101214377/csv:101206620/csv:101212275/csv:101215151/csv:101222382/csv:101205698/csv:101220380/csv:101223148/csv:101221855/csv:101221189/csv:101212275/csv:101207078/csv:101203257/csv:101215598/csv:101205263/csv:101…	63	37	CsaV3_3G023610/CsaV3_5G028880/CsaV3_6G000070/CsaV3_5G035850/CsaV3_1G001600/CsaV3_3G038380/CsaV3_6G044520/CsaV3_2G030720/CsaV3_3G010370/novel.1174/CsaV3_3G048280/CsaV3_3G021690/CsaV3_1G013530/CsaV3_3G007460/CsaV3_UNG009100/CsaV3_4G024200/CsaV3_7G035320/CsaV3_7G034360/CsaV3_3G020130/CsaV3_2G013320/CsaV3_UNG082650/CsaV3_6G044640/CsaV3_7G005670/CsaV3_1G039740/CsaV3_3G015370/novel.575/CsaV3_2G002080/C…	26	CsaV3_6G028390/CsaV3_5G031990/CsaV3_6G036340/CsaV3_2G012760/CsaV3_7G028870/CsaV3_6G040330/CsaV3_7G024120/CsaV3_4G002450/CsaV3_6G039890/CsaV3_4G008360/CsaV3_3G043710/CsaV3_6G008320/CsaV3_1G002350/CsaV3_3G021780/CsaV3_3G005000/CsaV3_4G000040/CsaV3_4G008750/CsaV3_1G010700/CsaV3_6G007900/CsaV3_3G013930/CsaV3_5G029170/CsaV3_4G033150/CsaV3_4G017590/novel.1201/CsaV3_1G016950/CsaV3_5G034210
csv04141	Protein processing in endoplasmic reticulum	113/2412	166/4184	0.00320266	0.0912758	CsaV3_4G024840/CsaV3_5G035180/CsaV3_3G002770/CsaV3_3G025020/CsaV3_3G027480/CsaV3_1G038710/CsaV3_6G009480/CsaV3_7G024760/CsaV3_4G028170/CsaV3_6G051910/CsaV3_4G032260/CsaV3_5G002220/CsaV3_1G039940/CsaV3_2G006970/CsaV3_3G002780/CsaV3_6G021770/CsaV3_1G012800/CsaV3_1G038690/CsaV3_1G009720/CsaV3_5G036070/CsaV3_4G008230/CsaV3_3G012670/CsaV3_7G029920/CsaV3_7G008470/CsaV3_3G017490/CsaV3_1G009950/CsaV3_1G0…	CsaV3_4G024840/CsaV3_5G035180/CsaV3_3G002770/CsaV3_3G025020/CsaV3_3G027480/CsaV3_1G038710/CsaV3_6G009480/CsaV3_7G024760/CsaV3_4G028170/CsaV3_6G051910/CsaV3_4G032260/CsaV3_5G002220/CsaV3_1G039940/CsaV3_2G006970/CsaV3_3G002780/CsaV3_6G021770/CsaV3_1G012800/CsaV3_1G038690/CsaV3_1G009720/CsaV3_5G036070/CsaV3_4G008230/CsaV3_3G012670/CsaV3_7G029920/CsaV3_7G008470/CsaV3_3G017490/CsaV3_1G009950/CsaV3_1G0…	csv:101215599/csv:101204918/csv:101219106/csv:101222273/csv:101210531/csv:101221822/csv:101220822/csv:101212307/csv:101217662/csv:101218356/csv:101207859/csv:101210687/csv:101222536/csv:101206151/csv:101219346/csv:101211539/csv:101214582/csv:101207890/csv:101220011/csv:101209121/csv:101206918/csv:101216851/csv:101221276/csv:101222781/csv:101210914/csv:101207554/csv:101205422/csv:101213598/csv:101…	113	30	CsaV3_5G035180/CsaV3_4G028170/CsaV3_5G002220/CsaV3_6G021770/CsaV3_7G029920/CsaV3_7G008470/CsaV3_3G017490/CsaV3_5G000720/CsaV3_1G001310/CsaV3_2G024370/CsaV3_6G012970/CsaV3_2G004220/CsaV3_4G002420/CsaV3_3G034390/CsaV3_7G001800/CsaV3_5G030370/CsaV3_5G034230/CsaV3_7G004390/CsaV3_3G007400/CsaV3_3G032490/CsaV3_2G006990/CsaV3_7G021800/CsaV3_6G047890/CsaV3_6G022460/CsaV3_6G001540/CsaV3_7G010210/CsaV3_7G0…	83	CsaV3_4G024840/CsaV3_3G002770/CsaV3_3G025020/CsaV3_3G027480/CsaV3_1G038710/CsaV3_6G009480/CsaV3_7G024760/CsaV3_6G051910/CsaV3_4G032260/CsaV3_1G039940/CsaV3_2G006970/CsaV3_3G002780/CsaV3_1G012800/CsaV3_1G038690/CsaV3_1G009720/CsaV3_5G036070/CsaV3_4G008230/CsaV3_3G012670/CsaV3_1G009950/CsaV3_1G044020/CsaV3_3G029990/CsaV3_4G004150/CsaV3_3G035900/CsaV3_3G006720/CsaV3_6G031390/CsaV3_5G036240/CsaV3_4G0…
csv00710	Carbon fixation in photosynthetic organisms	56/2412	77/4184	0.00416976	0.0950706	CsaV3_6G028390/CsaV3_5G034360/CsaV3_3G030440/CsaV3_3G023610/CsaV3_3G020110/CsaV3_2G015280/CsaV3_5G028880/CsaV3_5G035850/CsaV3_5G031200/CsaV3_3G035920/CsaV3_6G044520/CsaV3_3G009790/CsaV3_3G001220/CsaV3_2G030720/CsaV3_6G001210/CsaV3_3G010370/CsaV3_5G031220/CsaV3_2G012760/CsaV3_7G028870/CsaV3_7G033940/CsaV3_7G021470/novel.1174/CsaV3_3G048280/CsaV3_4G025890/CsaV3_7G022960/CsaV3_3G007460/CsaV3_UNG0091…	CsaV3_6G028390/CsaV3_5G034360/CsaV3_3G030440/CsaV3_3G023610/CsaV3_3G020110/CsaV3_2G015280/CsaV3_5G028880/CsaV3_5G035850/CsaV3_5G031200/CsaV3_3G035920/CsaV3_6G044520/CsaV3_3G009790/CsaV3_3G001220/CsaV3_2G030720/CsaV3_6G001210/CsaV3_3G010370/CsaV3_5G031220/CsaV3_2G012760/CsaV3_7G028870/CsaV3_7G033940/CsaV3_7G021470/-/CsaV3_3G048280/CsaV3_4G025890/CsaV3_7G022960/CsaV3_3G007460/CsaV3_UNG009100/CsaV3_…	csv:101214377/csv:101219300/csv:101220055/csv:101214108/csv:101202856/csv:101204323/csv:101216256/csv:101211170/csv:101213570/csv:101219631/csv:101219252/csv:101215805/csv:101208330/csv:101218724/csv:101214545/csv:101204181/csv:101220645/csv:101204387/csv:101214377/csv:101212146/csv:101219476/csv:101212275/csv:101222382/csv:101211447/csv:101215988/csv:101221189/csv:101212275/csv:101207078/csv:101…	56	42	CsaV3_5G034360/CsaV3_3G030440/CsaV3_3G023610/CsaV3_3G020110/CsaV3_2G015280/CsaV3_5G028880/CsaV3_5G035850/CsaV3_5G031200/CsaV3_3G035920/CsaV3_6G044520/CsaV3_3G009790/CsaV3_3G001220/CsaV3_2G030720/CsaV3_3G010370/CsaV3_5G031220/CsaV3_7G021470/novel.1174/CsaV3_3G048280/CsaV3_4G025890/CsaV3_7G022960/CsaV3_3G007460/CsaV3_UNG009100/CsaV3_3G031010/CsaV3_6G006270/CsaV3_4G025880/CsaV3_6G013490/CsaV3_2G0248…	14	CsaV3_6G028390/CsaV3_6G001210/CsaV3_2G012760/CsaV3_7G028870/CsaV3_7G033940/CsaV3_4G008360/CsaV3_1G002350/CsaV3_5G034910/CsaV3_7G022930/CsaV3_1G013270/CsaV3_3G013930/CsaV3_4G033150/novel.1201/CsaV3_1G009420
csv03030	DNA replication	30/2412	40/4184	0.0172165	0.327114	CsaV3_3G032880/CsaV3_6G016510/CsaV3_7G000210/CsaV3_6G051630/CsaV3_6G053180/CsaV3_7G029940/CsaV3_2G003500/CsaV3_3G046980/CsaV3_5G039570/CsaV3_1G006450/CsaV3_1G006150/CsaV3_1G046580/CsaV3_5G005690/CsaV3_3G005270/CsaV3_6G014890/CsaV3_3G010270/CsaV3_5G035370/CsaV3_6G038390/CsaV3_6G014300/CsaV3_1G002970/CsaV3_3G037350/CsaV3_5G008820/CsaV3_6G008170/CsaV3_1G038240/CsaV3_6G034260/CsaV3_UNG115920/CsaV3_2G…	CsaV3_3G032880/CsaV3_6G016510/CsaV3_7G000210/CsaV3_6G051630/CsaV3_6G053180/CsaV3_7G029940/CsaV3_2G003500/CsaV3_3G046980/CsaV3_5G039570/CsaV3_1G006450/CsaV3_1G006150/CsaV3_1G046580/CsaV3_5G005690/CsaV3_3G005270/CsaV3_6G014890/CsaV3_3G010270/CsaV3_5G035370/CsaV3_6G038390/CsaV3_6G014300/CsaV3_1G002970/CsaV3_3G037350/CsaV3_5G008820/CsaV3_6G008170/CsaV3_1G038240/CsaV3_6G034260/CsaV3_UNG115920/CsaV3_2G…	csv:101219546/csv:101208473/csv:101211850/csv:101210889/csv:101219775/csv:101219064/csv:101211822/csv:101220176/csv:101203146/csv:101210420/csv:101206268/csv:101208243/csv:101209940/csv:101212518/csv:101208568/csv:101220726/csv:101205315/csv:101218845/csv:101213447/csv:101208545/csv:101203835/csv:101213310/csv:101217274/csv:101204273/csv:101217230/csv:101221224/csv:101208210/csv:101204361/csv:101…	30	8	CsaV3_1G046580/CsaV3_5G005690/CsaV3_3G005270/CsaV3_3G010270/CsaV3_3G037350/CsaV3_1G038240/CsaV3_3G038830/CsaV3_1G031640	22	CsaV3_3G032880/CsaV3_6G016510/CsaV3_7G000210/CsaV3_6G051630/CsaV3_6G053180/CsaV3_7G029940/CsaV3_2G003500/CsaV3_3G046980/CsaV3_5G039570/CsaV3_1G006450/CsaV3_1G006150/CsaV3_6G014890/CsaV3_5G035370/CsaV3_6G038390/CsaV3_6G014300/CsaV3_1G002970/CsaV3_5G008820/CsaV3_6G008170/CsaV3_6G034260/CsaV3_UNG115920/CsaV3_2G031270/CsaV3_6G038660
csv00010	Glycolysis / Gluconeogenesis	77/2412	116/4184	0.0322208	0.464899	CsaV3_2G015280/CsaV3_5G031990/CsaV3_6G000070/CsaV3_1G001600/CsaV3_3G035920/CsaV3_6G040390/CsaV3_5G010430/CsaV3_6G001210/CsaV3_6G036340/CsaV3_2G001890/CsaV3_3G041600/CsaV3_1G046070/CsaV3_6G040330/CsaV3_7G021470/CsaV3_7G024120/CsaV3_3G048280/CsaV3_4G013550/CsaV3_4G025890/CsaV3_1G039980/CsaV3_6G031750/CsaV3_2G017260/CsaV3_7G022960/CsaV3_1G004410/CsaV3_1G043010/CsaV3_3G043710/CsaV3_6G008320/CsaV3_4G0…	CsaV3_2G015280/CsaV3_5G031990/CsaV3_6G000070/CsaV3_1G001600/CsaV3_3G035920/CsaV3_6G040390/CsaV3_5G010430/CsaV3_6G001210/CsaV3_6G036340/CsaV3_2G001890/CsaV3_3G041600/CsaV3_1G046070/CsaV3_6G040330/CsaV3_7G021470/CsaV3_7G024120/CsaV3_3G048280/CsaV3_4G013550/CsaV3_4G025890/CsaV3_1G039980/CsaV3_6G031750/CsaV3_2G017260/CsaV3_7G022960/CsaV3_1G004410/CsaV3_1G043010/CsaV3_3G043710/CsaV3_6G008320/CsaV3_4G0…	csv:101204323/csv:101208773/csv:101207718/csv:101209430/csv:101219631/csv:101208322/csv:101205760/csv:101214545/csv:101205918/csv:101218300/csv:101203750/csv:101215219/csv:101206620/csv:101219476/csv:101215151/csv:101222382/csv:101217925/csv:101211447/csv:101202739/csv:101212881/csv:101209304/csv:101215988/csv:101222545/csv:101215511/csv:101203257/csv:101215598/csv:101208728/csv:101219491/csv:101…	77	44	CsaV3_2G015280/CsaV3_6G000070/CsaV3_1G001600/CsaV3_3G035920/CsaV3_2G001890/CsaV3_1G046070/CsaV3_7G021470/CsaV3_3G048280/CsaV3_4G025890/CsaV3_1G039980/CsaV3_2G017260/CsaV3_7G022960/CsaV3_1G043010/CsaV3_7G024950/CsaV3_4G024200/CsaV3_4G025880/CsaV3_6G013490/CsaV3_3G033550/CsaV3_6G013500/CsaV3_7G034360/CsaV3_7G024990/CsaV3_3G020130/CsaV3_3G033310/CsaV3_2G013320/CsaV3_6G044640/CsaV3_4G025300/CsaV3_5G0…	33	CsaV3_5G031990/CsaV3_6G040390/CsaV3_5G010430/CsaV3_6G001210/CsaV3_6G036340/CsaV3_3G041600/CsaV3_6G040330/CsaV3_7G024120/CsaV3_4G013550/CsaV3_6G031750/CsaV3_1G004410/CsaV3_3G043710/CsaV3_6G008320/CsaV3_4G037690/CsaV3_6G044550/CsaV3_3G021780/CsaV3_4G000040/CsaV3_4G008960/CsaV3_2G003650/CsaV3_5G010390/CsaV3_3G008370/CsaV3_6G039140/CsaV3_7G022930/CsaV3_3G023460/CsaV3_6G007900/CsaV3_3G013930/CsaV3_5G0…
csv00900	Terpenoid backbone biosynthesis	35/2412	49/4184	0.0326245	0.464899	CsaV3_6G005620/CsaV3_6G035980/CsaV3_3G006930/CsaV3_7G010240/CsaV3_1G041900/CsaV3_1G002370/CsaV3_5G025100/CsaV3_3G008710/CsaV3_6G051980/CsaV3_5G014680/CsaV3_5G035560/CsaV3_3G003490/CsaV3_4G017400/CsaV3_7G023860/CsaV3_1G001500/CsaV3_2G005140/CsaV3_2G014440/CsaV3_6G005870/CsaV3_1G012820/CsaV3_2G017600/CsaV3_2G031800/CsaV3_4G003310/CsaV3_7G006800/CsaV3_1G044500/CsaV3_4G034210/CsaV3_7G001340/CsaV3_1G0…	CsaV3_6G005620/CsaV3_6G035980/CsaV3_3G006930/CsaV3_7G010240/CsaV3_1G041900/CsaV3_1G002370/CsaV3_5G025100/CsaV3_3G008710/CsaV3_6G051980/CsaV3_5G014680/CsaV3_5G035560/CsaV3_3G003490/CsaV3_4G017400/CsaV3_7G023860/CsaV3_1G001500/CsaV3_2G005140/CsaV3_2G014440/CsaV3_6G005870/CsaV3_1G012820/CsaV3_2G017600/CsaV3_2G031800/CsaV3_4G003310/CsaV3_7G006800/CsaV3_1G044500/CsaV3_4G034210/CsaV3_7G001340/CsaV3_1G0…	csv:101214927/csv:101210779/csv:101218190/csv:101212295/csv:101221308/csv:101221755/csv:101216243/csv:101219049/csv:101213567/csv:101210090/csv:101210057/csv:101208259/csv:105435233/csv:101217388/csv:101207716/csv:101211331/csv:101205824/csv:101223195/csv:101214344/csv:101209799/csv:101220427/csv:101212104/csv:101205649/csv:101209923/csv:101223178/csv:101213533/csv:101212707/csv:101212112/csv:101…	35	22	CsaV3_6G005620/CsaV3_6G035980/CsaV3_3G006930/CsaV3_7G010240/CsaV3_1G041900/CsaV3_1G002370/CsaV3_5G025100/CsaV3_7G023860/CsaV3_1G001500/CsaV3_2G014440/CsaV3_1G012820/CsaV3_2G017600/CsaV3_2G031800/CsaV3_4G003310/CsaV3_7G006800/CsaV3_1G044500/CsaV3_4G034210/CsaV3_7G001340/CsaV3_1G015480/CsaV3_7G002170/CsaV3_3G020450/CsaV3_3G042430	13	CsaV3_3G008710/CsaV3_6G051980/CsaV3_5G014680/CsaV3_5G035560/CsaV3_3G003490/CsaV3_4G017400/CsaV3_2G005140/CsaV3_6G005870/CsaV3_3G006740/CsaV3_4G007960/CsaV3_7G016180/CsaV3_6G016250/CsaV3_6G002810
csv00250	Alanine, aspartate and glutamate metabolism	38/2412	54/4184	0.0369569	0.468121	CsaV3_6G039090/CsaV3_5G029640/CsaV3_1G043170/CsaV3_4G026970/CsaV3_1G000670/CsaV3_1G005000/CsaV3_5G031200/CsaV3_4G013280/CsaV3_5G027390/CsaV3_5G031220/CsaV3_7G033940/CsaV3_5G020650/CsaV3_2G030250/CsaV3_3G033240/CsaV3_4G035950/CsaV3_3G031010/CsaV3_4G004900/CsaV3_3G027930/CsaV3_4G032320/CsaV3_2G024880/CsaV3_6G045440/CsaV3_7G030560/CsaV3_UNG183400/CsaV3_2G032340/CsaV3_3G047470/CsaV3_2G015340/CsaV3_3G…	CsaV3_6G039090/CsaV3_5G029640/CsaV3_1G043170/CsaV3_4G026970/CsaV3_1G000670/CsaV3_1G005000/CsaV3_5G031200/CsaV3_4G013280/CsaV3_5G027390/CsaV3_5G031220/CsaV3_7G033940/CsaV3_5G020650/CsaV3_2G030250/CsaV3_3G033240/CsaV3_4G035950/CsaV3_3G031010/CsaV3_4G004900/CsaV3_3G027930/CsaV3_4G032320/CsaV3_2G024880/CsaV3_6G045440/CsaV3_7G030560/CsaV3_UNG183400/CsaV3_2G032340/CsaV3_3G047470/CsaV3_2G015340/CsaV3_3G…	csv:101207975/csv:101222857/csv:101217893/csv:101210304/csv:101215982/csv:101210903/csv:101213570/csv:101221948/csv:101205815/csv:101220645/csv:101212146/csv:101216119/csv:101213711/csv:101203709/csv:101213917/csv:101207254/csv:101208662/csv:101213224/csv:101219660/csv:101207914/csv:101209128/csv:101213413/csv:101208662/csv:101213342/csv:101213892/csv:101203840/csv:101221473/csv:101218466/csv:101…	38	27	CsaV3_6G039090/CsaV3_5G029640/CsaV3_1G043170/CsaV3_4G026970/CsaV3_1G000670/CsaV3_1G005000/CsaV3_5G031200/CsaV3_5G027390/CsaV3_5G031220/CsaV3_2G030250/CsaV3_3G033240/CsaV3_3G031010/CsaV3_4G004900/CsaV3_4G032320/CsaV3_2G024880/CsaV3_6G045440/CsaV3_7G030560/CsaV3_UNG183400/CsaV3_2G032340/CsaV3_3G047470/CsaV3_3G021030/CsaV3_5G005130/CsaV3_4G007380/CsaV3_3G044050/CsaV3_1G007880/CsaV3_6G031950/CsaV3_5G…	11	CsaV3_4G013280/CsaV3_7G033940/CsaV3_5G020650/CsaV3_4G035950/CsaV3_3G027930/CsaV3_2G015340/CsaV3_1G013270/CsaV3_1G009560/CsaV3_6G016090/CsaV3_4G031360/CsaV3_1G039010
csv03440	Homologous recombination	47/2412	69/4184	0.0478541	0.543414	CsaV3_1G001470/CsaV3_2G000040/CsaV3_UNG082660/novel.1064/CsaV3_3G046980/CsaV3_5G019970/CsaV3_UNG040210/CsaV3_3G039390/CsaV3_3G009800/CsaV3_6G052190/novel.1204/CsaV3_3G026510/CsaV3_UNG115900/CsaV3_5G013190/CsaV3_1G006450/CsaV3_3G028200/CsaV3_6G021820/CsaV3_2G001430/CsaV3_5G005690/CsaV3_3G005270/CsaV3_2G022190/CsaV3_4G037380/CsaV3_3G018560/CsaV3_3G021130/CsaV3_UNG113870/CsaV3_UNG169310/CsaV3_3G0443…	CsaV3_1G001470/CsaV3_2G000040/CsaV3_UNG082660/-/CsaV3_3G046980/CsaV3_5G019970/CsaV3_UNG040210/CsaV3_3G039390/CsaV3_3G009800/CsaV3_6G052190/-/CsaV3_3G026510/CsaV3_UNG115900/CsaV3_5G013190/CsaV3_1G006450/CsaV3_3G028200/CsaV3_6G021820/CsaV3_2G001430/CsaV3_5G005690/CsaV3_3G005270/CsaV3_2G022190/CsaV3_4G037380/CsaV3_3G018560/CsaV3_3G021130/CsaV3_UNG113870/CsaV3_UNG169310/CsaV3_3G044350/CsaV3_3G019190/…	csv:101208785/csv:101210305/csv:101210305/csv:101210305/csv:101220176/csv:101210305/csv:101210305/csv:101209351/csv:101216284/csv:101212120/csv:101210305/csv:101212525/csv:101212525/csv:101215241/csv:101210420/csv:101222995/csv:101210549/csv:101213032/csv:101209940/csv:101212518/csv:101216994/csv:101217839/csv:101218846/csv:101205356/csv:101210305/csv:101210305/csv:101217141/csv:101211021/csv:101…	47	25	CsaV3_1G001470/CsaV3_2G000040/CsaV3_UNG082660/novel.1064/CsaV3_5G019970/CsaV3_UNG040210/novel.1204/CsaV3_UNG115900/CsaV3_5G013190/CsaV3_5G005690/CsaV3_3G005270/CsaV3_2G022190/CsaV3_3G021130/CsaV3_UNG113870/CsaV3_UNG169310/CsaV3_UNG224670/CsaV3_4G038030/CsaV3_3G037350/CsaV3_UNG142080/CsaV3_4G035510/CsaV3_UNG123970/CsaV3_3G015890/CsaV3_5G013670/CsaV3_3G038830/CsaV3_1G031640	22	CsaV3_3G046980/CsaV3_3G039390/CsaV3_3G009800/CsaV3_6G052190/CsaV3_3G026510/CsaV3_1G006450/CsaV3_3G028200/CsaV3_6G021820/CsaV3_2G001430/CsaV3_4G037380/CsaV3_3G018560/CsaV3_3G044350/CsaV3_3G019190/CsaV3_UNG178380/CsaV3_5G035370/CsaV3_1G002970/CsaV3_4G037390/CsaV3_2G001420/CsaV3_6G031560/CsaV3_2G015070/CsaV3_5G010570/CsaV3_7G029870
csv00280	Valine, leucine and isoleucine degradation	33/2412	47/4184	0.0524386	0.543414	CsaV3_1G043650/CsaV3_7G008530/CsaV3_4G026970/CsaV3_6G000070/CsaV3_3G028760/CsaV3_1G001600/CsaV3_2G001870/CsaV3_2G025820/CsaV3_6G021710/CsaV3_3G014880/CsaV3_6G038810/CsaV3_3G003490/CsaV3_1G037300/CsaV3_3G033240/CsaV3_4G024200/CsaV3_4G004900/CsaV3_3G010140/CsaV3_7G034360/CsaV3_7G027810/CsaV3_2G001880/CsaV3_2G002430/CsaV3_UNG183400/CsaV3_7G007110/CsaV3_3G015370/CsaV3_3G014830/CsaV3_3G002440/CsaV3_2G…	CsaV3_1G043650/CsaV3_7G008530/CsaV3_4G026970/CsaV3_6G000070/CsaV3_3G028760/CsaV3_1G001600/CsaV3_2G001870/CsaV3_2G025820/CsaV3_6G021710/CsaV3_3G014880/CsaV3_6G038810/CsaV3_3G003490/CsaV3_1G037300/CsaV3_3G033240/CsaV3_4G024200/CsaV3_4G004900/CsaV3_3G010140/CsaV3_7G034360/CsaV3_7G027810/CsaV3_2G001880/CsaV3_2G002430/CsaV3_UNG183400/CsaV3_7G007110/CsaV3_3G015370/CsaV3_3G014830/CsaV3_3G002440/CsaV3_2G…	csv:101222552/csv:101204438/csv:101210304/csv:101207718/csv:101208182/csv:101209430/csv:101217826/csv:101214004/csv:101216988/csv:101207559/csv:101203798/csv:101208259/csv:101210819/csv:101203709/csv:101205263/csv:101208662/csv:101221427/csv:101205436/csv:101221786/csv:101218062/csv:101207231/csv:101208662/csv:101204924/csv:101222823/csv:101206829/csv:101203900/csv:101212301/csv:101217710/csv:101…	33	31	CsaV3_1G043650/CsaV3_7G008530/CsaV3_4G026970/CsaV3_6G000070/CsaV3_1G001600/CsaV3_2G001870/CsaV3_2G025820/CsaV3_6G021710/CsaV3_3G014880/CsaV3_6G038810/CsaV3_1G037300/CsaV3_3G033240/CsaV3_4G024200/CsaV3_4G004900/CsaV3_3G010140/CsaV3_7G034360/CsaV3_7G027810/CsaV3_2G001880/CsaV3_2G002430/CsaV3_UNG183400/CsaV3_7G007110/CsaV3_3G015370/CsaV3_3G014830/CsaV3_3G002440/CsaV3_2G011380/CsaV3_3G011240/CsaV3_4G…	2	CsaV3_3G028760/CsaV3_3G003490
csv00520	Amino sugar and nucleotide sugar metabolism	75/2412	115/4184	0.0572014	0.543414	CsaV3_4G008770/CsaV3_6G014590/CsaV3_3G039690/CsaV3_6G006740/CsaV3_7G027500/CsaV3_1G006170/CsaV3_3G007870/CsaV3_4G010130/CsaV3_5G004970/CsaV3_4G008170/CsaV3_2G004170/CsaV3_6G006000/CsaV3_2G001890/CsaV3_5G006710/CsaV3_6G033720/CsaV3_3G045370/CsaV3_4G013490/CsaV3_3G032600/CsaV3_7G006230/CsaV3_6G052660/CsaV3_3G021110/CsaV3_2G007810/CsaV3_5G003160/CsaV3_4G029030/CsaV3_1G043010/CsaV3_3G035180/CsaV3_6G0…	CsaV3_4G008770/CsaV3_6G014590/CsaV3_3G039690/CsaV3_6G006740/CsaV3_7G027500/CsaV3_1G006170/CsaV3_3G007870/CsaV3_4G010130/CsaV3_5G004970/CsaV3_4G008170/CsaV3_2G004170/CsaV3_6G006000/CsaV3_2G001890/CsaV3_5G006710/CsaV3_6G033720/CsaV3_3G045370/CsaV3_4G013490/CsaV3_3G032600/CsaV3_7G006230/CsaV3_6G052660/CsaV3_3G021110/CsaV3_2G007810/CsaV3_5G003160/CsaV3_4G029030/CsaV3_1G043010/CsaV3_3G035180/CsaV3_6G0…	csv:101222306/csv:101202932/csv:101212931/csv:101213366/csv:101206067/csv:101203952/csv:101204338/csv:101207713/csv:101220595/csv:101208780/csv:101222554/csv:101223005/csv:101218300/csv:101202942/csv:101221070/csv:101221562/csv:101218632/csv:101211123/csv:101216143/csv:101207951/csv:101220298/csv:101214888/csv:101203400/csv:101212569/csv:101215511/csv:101204038/csv:101219491/csv:101222574/csv:101…	75	26	CsaV3_4G010130/CsaV3_2G001890/CsaV3_5G006710/CsaV3_3G045370/CsaV3_3G021110/CsaV3_5G003160/CsaV3_4G029030/CsaV3_1G043010/CsaV3_2G007730/CsaV3_3G020950/CsaV3_7G002310/CsaV3_2G009420/CsaV3_5G028300/CsaV3_1G038770/CsaV3_6G023950/CsaV3_2G001860/CsaV3_6G015080/CsaV3_4G002630/CsaV3_5G005570/CsaV3_6G023940/CsaV3_2G001900/CsaV3_5G001840/CsaV3_6G047760/CsaV3_4G001060/CsaV3_4G035660/CsaV3_5G008090	49	CsaV3_4G008770/CsaV3_6G014590/CsaV3_3G039690/CsaV3_6G006740/CsaV3_7G027500/CsaV3_1G006170/CsaV3_3G007870/CsaV3_5G004970/CsaV3_4G008170/CsaV3_2G004170/CsaV3_6G006000/CsaV3_6G033720/CsaV3_4G013490/CsaV3_3G032600/CsaV3_7G006230/CsaV3_6G052660/CsaV3_2G007810/CsaV3_3G035180/CsaV3_6G044550/CsaV3_1G036780/CsaV3_1G037730/CsaV3_3G003130/CsaV3_1G015630/CsaV3_1G028640/CsaV3_3G000410/CsaV3_4G009790/CsaV3_6G0…
csv00330	Arginine and proline metabolism	38/2412	56/4184	0.0763863	0.669849	CsaV3_4G032140/CsaV3_3G014000/CsaV3_1G039020/CsaV3_3G028000/CsaV3_6G047520/CsaV3_1G001600/CsaV3_4G007490/CsaV3_6G005580/CsaV3_3G041850/CsaV3_7G000860/CsaV3_1G039030/CsaV3_6G043860/CsaV3_2G001470/CsaV3_4G024200/CsaV3_5G000580/CsaV3_7G034360/CsaV3_5G031670/CsaV3_1G015010/CsaV3_2G032340/CsaV3_2G015800/CsaV3_4G003800/CsaV3_3G047470/CsaV3_1G015920/CsaV3_3G034580/CsaV3_2G015820/CsaV3_1G013270/CsaV3_6G0…	CsaV3_4G032140/CsaV3_3G014000/CsaV3_1G039020/CsaV3_3G028000/CsaV3_6G047520/CsaV3_1G001600/CsaV3_4G007490/CsaV3_6G005580/CsaV3_3G041850/CsaV3_7G000860/CsaV3_1G039030/CsaV3_6G043860/CsaV3_2G001470/CsaV3_4G024200/CsaV3_5G000580/CsaV3_7G034360/CsaV3_5G031670/CsaV3_1G015010/CsaV3_2G032340/CsaV3_2G015800/CsaV3_4G003800/CsaV3_3G047470/CsaV3_1G015920/CsaV3_3G034580/CsaV3_2G015820/CsaV3_1G013270/CsaV3_6G0…	csv:101205765/csv:101215570/csv:101209171/csv:101212743/csv:101217481/csv:101209430/csv:101213852/csv:101218235/csv:101221643/csv:101204792/csv:101209418/csv:101209446/csv:101205432/csv:101205263/csv:101222254/csv:101205436/csv:101213410/csv:101207902/csv:101213342/csv:101214819/csv:101206818/csv:101213892/csv:101207902/csv:101222070/csv:101215057/csv:101217299/csv:101207674/csv:101218968/csv:101…	38	26	CsaV3_1G039020/CsaV3_1G001600/CsaV3_4G007490/CsaV3_6G005580/CsaV3_3G041850/CsaV3_1G039030/CsaV3_2G001470/CsaV3_4G024200/CsaV3_5G000580/CsaV3_7G034360/CsaV3_5G031670/CsaV3_1G015010/CsaV3_2G032340/CsaV3_2G015800/CsaV3_4G003800/CsaV3_3G047470/CsaV3_1G015920/CsaV3_2G015820/CsaV3_6G001400/CsaV3_4G005260/CsaV3_1G007880/CsaV3_4G028150/CsaV3_7G030830/CsaV3_1G003170/CsaV3_3G020560/CsaV3_5G005200	12	CsaV3_4G032140/CsaV3_3G014000/CsaV3_3G028000/CsaV3_6G047520/CsaV3_7G000860/CsaV3_6G043860/CsaV3_3G034580/CsaV3_1G013270/CsaV3_6G006290/CsaV3_5G004720/CsaV3_2G024480/CsaV3_2G015310
csv01200	Carbon metabolism	152/2412	246/4184	0.0984443	0.801618	CsaV3_6G031490/CsaV3_6G028390/CsaV3_5G034360/CsaV3_2G011710/CsaV3_6G039090/CsaV3_1G043650/CsaV3_1G042270/CsaV3_4G027510/CsaV3_3G030440/CsaV3_3G023610/CsaV3_3G020110/CsaV3_2G015280/CsaV3_5G028880/CsaV3_5G031990/CsaV3_1G043170/CsaV3_2G011840/CsaV3_3G018240/CsaV3_6G000070/CsaV3_5G035850/CsaV3_5G003980/CsaV3_5G031200/CsaV3_3G035920/CsaV3_6G044520/CsaV3_3G009790/CsaV3_5G030130/CsaV3_3G001220/CsaV3_6G0…	CsaV3_6G031490/CsaV3_6G028390/CsaV3_5G034360/CsaV3_2G011710/CsaV3_6G039090/CsaV3_1G043650/CsaV3_1G042270/CsaV3_4G027510/CsaV3_3G030440/CsaV3_3G023610/CsaV3_3G020110/CsaV3_2G015280/CsaV3_5G028880/CsaV3_5G031990/CsaV3_1G043170/CsaV3_2G011840/CsaV3_3G018240/CsaV3_6G000070/CsaV3_5G035850/CsaV3_5G003980/CsaV3_5G031200/CsaV3_3G035920/CsaV3_6G044520/CsaV3_3G009790/CsaV3_5G030130/CsaV3_3G001220/CsaV3_6G0…	csv:101216662/csv:101214377/csv:101219300/csv:101215910/csv:101207975/csv:101222552/csv:101216190/csv:101207741/csv:101220055/csv:101214108/csv:101202856/csv:101204323/csv:101216256/csv:101208773/csv:101217893/csv:101216871/csv:101221689/csv:101207718/csv:101211170/csv:101215470/csv:101213570/csv:101219631/csv:101219252/csv:101215805/csv:101216623/csv:101208330/csv:101215498/csv:101221948/csv:101…	152	99	CsaV3_6G031490/CsaV3_5G034360/CsaV3_6G039090/CsaV3_1G043650/CsaV3_1G042270/CsaV3_4G027510/CsaV3_3G030440/CsaV3_3G023610/CsaV3_3G020110/CsaV3_2G015280/CsaV3_5G028880/CsaV3_1G043170/CsaV3_6G000070/CsaV3_5G035850/CsaV3_5G003980/CsaV3_5G031200/CsaV3_3G035920/CsaV3_6G044520/CsaV3_3G009790/CsaV3_5G030130/CsaV3_3G001220/CsaV3_6G051820/CsaV3_2G030720/CsaV3_3G010370/CsaV3_6G048160/CsaV3_5G031220/CsaV3_7G0…	53	CsaV3_6G028390/CsaV3_2G011710/CsaV3_5G031990/CsaV3_2G011840/CsaV3_3G018240/CsaV3_4G013280/CsaV3_6G040390/CsaV3_6G001210/CsaV3_1G007500/CsaV3_6G036340/CsaV3_2G012760/CsaV3_7G028870/CsaV3_6G040330/CsaV3_7G033940/CsaV3_7G024120/CsaV3_4G013550/CsaV3_6G031750/CsaV3_4G008360/CsaV3_3G043710/CsaV3_6G008320/CsaV3_6G044550/CsaV3_6G047780/CsaV3_3G000370/CsaV3_1G002350/CsaV3_3G021780/CsaV3_4G000040/CsaV3_4G0…
csv04712	Circadian rhythm - plant	21/2412	30/4184	0.11622	0.839432	CsaV3_7G024490/CsaV3_3G015190/CsaV3_2G025750/CsaV3_1G005680/CsaV3_5G014370/CsaV3_5G006010/CsaV3_5G000090/CsaV3_1G045940/CsaV3_1G044210/CsaV3_3G047490/CsaV3_2G031960/CsaV3_3G049750/CsaV3_6G036100/CsaV3_4G024430/CsaV3_7G034990/CsaV3_6G008360/CsaV3_6G043900/CsaV3_6G044000/CsaV3_7G002530/CsaV3_3G046530/CsaV3_3G027830	CsaV3_7G024490/CsaV3_3G015190/CsaV3_2G025750/CsaV3_1G005680/CsaV3_5G014370/CsaV3_5G006010/CsaV3_5G000090/CsaV3_1G045940/CsaV3_1G044210/CsaV3_3G047490/CsaV3_2G031960/CsaV3_3G049750/CsaV3_6G036100/CsaV3_4G024430/CsaV3_7G034990/CsaV3_6G008360/CsaV3_6G043900/CsaV3_6G044000/CsaV3_7G002530/CsaV3_3G046530/CsaV3_3G027830	csv:101216952/csv:101212197/csv:101203735/csv:101220107/csv:101222712/csv:101206050/csv:101209788/csv:101203654/csv:101207969/csv:101213649/csv:101218051/csv:101211694/csv:101208491/csv:101210765/csv:101208149/csv:101214878/csv:101207095/csv:101205903/csv:101211915/csv:101205952/csv:101205211	21	13	CsaV3_7G024490/CsaV3_3G015190/CsaV3_2G025750/CsaV3_1G005680/CsaV3_5G014370/CsaV3_5G006010/CsaV3_3G047490/CsaV3_6G036100/CsaV3_4G024430/CsaV3_6G008360/CsaV3_6G043900/CsaV3_3G046530/CsaV3_3G027830	8	CsaV3_5G000090/CsaV3_1G045940/CsaV3_1G044210/CsaV3_2G031960/CsaV3_3G049750/CsaV3_7G034990/CsaV3_6G044000/CsaV3_7G002530
csv00750	Vitamin B6 metabolism	187280	13/4184	0.12858	0.839432	CsaV3_3G033790/CsaV3_7G034880/CsaV3_3G000370/CsaV3_5G000200/CsaV3_3G047810/CsaV3_3G021680/CsaV3_6G013840/CsaV3_7G033260/CsaV3_3G007930/CsaV3_2G001290	CsaV3_3G033790/CsaV3_7G034880/CsaV3_3G000370/CsaV3_5G000200/CsaV3_3G047810/CsaV3_3G021680/CsaV3_6G013840/CsaV3_7G033260/CsaV3_3G007930/CsaV3_2G001290	csv:101212698/csv:101217360/csv:101202934/csv:101218000/csv:101207469/csv:101205462/csv:101214331/csv:101219485/csv:101207384/csv:101208070	10	5	CsaV3_3G047810/CsaV3_3G021680/CsaV3_6G013840/CsaV3_7G033260/CsaV3_2G001290	5	CsaV3_3G033790/CsaV3_7G034880/CsaV3_3G000370/CsaV3_5G000200/CsaV3_3G007930
csv00052	Galactose metabolism	32/2412	48/4184	0.129773	0.839432	CsaV3_1G026710/CsaV3_1G046750/CsaV3_5G010860/CsaV3_4G011820/CsaV3_2G001890/CsaV3_3G041600/CsaV3_1G039980/CsaV3_3G021110/CsaV3_5G003160/CsaV3_1G004410/CsaV3_1G015730/CsaV3_1G043010/CsaV3_6G044550/CsaV3_5G029190/CsaV3_4G008960/CsaV3_6G039140/CsaV3_4G006660/CsaV3_5G028300/CsaV3_6G000050/CsaV3_2G001860/CsaV3_3G023460/CsaV3_3G009370/CsaV3_5G005570/CsaV3_2G024360/CsaV3_4G035700/CsaV3_2G001900/CsaV3_3G0…	CsaV3_1G026710/CsaV3_1G046750/CsaV3_5G010860/CsaV3_4G011820/CsaV3_2G001890/CsaV3_3G041600/CsaV3_1G039980/CsaV3_3G021110/CsaV3_5G003160/CsaV3_1G004410/CsaV3_1G015730/CsaV3_1G043010/CsaV3_6G044550/CsaV3_5G029190/CsaV3_4G008960/CsaV3_6G039140/CsaV3_4G006660/CsaV3_5G028300/CsaV3_6G000050/CsaV3_2G001860/CsaV3_3G023460/CsaV3_3G009370/CsaV3_5G005570/CsaV3_2G024360/CsaV3_4G035700/CsaV3_2G001900/CsaV3_3G0…	csv:101203037/csv:101216685/csv:101210778/csv:101211538/csv:101218300/csv:101203750/csv:101202739/csv:101220298/csv:101203400/csv:101222545/csv:101215109/csv:101215511/csv:101219491/csv:101211924/csv:101219465/csv:101208701/csv:101209558/csv:101218883/csv:101208382/csv:101218300/csv:101220704/csv:101208525/csv:101209451/csv:101214883/csv:101215520/csv:101218300/csv:101208180/csv:101205820/csv:101…	32	18	CsaV3_1G026710/CsaV3_5G010860/CsaV3_4G011820/CsaV3_2G001890/CsaV3_1G039980/CsaV3_3G021110/CsaV3_5G003160/CsaV3_1G015730/CsaV3_1G043010/CsaV3_5G028300/CsaV3_6G000050/CsaV3_2G001860/CsaV3_5G005570/CsaV3_4G035700/CsaV3_2G001900/CsaV3_5G001840/CsaV3_7G034730/CsaV3_4G004200	14	CsaV3_1G046750/CsaV3_3G041600/CsaV3_1G004410/CsaV3_6G044550/CsaV3_5G029190/CsaV3_4G008960/CsaV3_6G039140/CsaV3_4G006660/CsaV3_3G023460/CsaV3_3G009370/CsaV3_2G024360/CsaV3_3G031720/CsaV3_3G037440/CsaV3_6G048090
csv04626	Plant-pathogen interaction	90/2412	144/4184	0.132542	0.839432	CsaV3_6G039330/CsaV3_1G033530/CsaV3_1G038710/CsaV3_1G031130/CsaV3_6G049070/CsaV3_6G009480/CsaV3_3G028050/CsaV3_5G036030/CsaV3_3G046100/CsaV3_7G023780/CsaV3_3G012800/CsaV3_4G002860/CsaV3_1G038690/CsaV3_7G006290/CsaV3_3G010940/CsaV3_1G044520/CsaV3_6G022090/CsaV3_6G034010/CsaV3_3G017490/CsaV3_2G029200/CsaV3_3G033350/CsaV3_7G001990/CsaV3_4G009310/CsaV3_3G040820/CsaV3_7G028550/CsaV3_4G036210/CsaV3_3G0…	CsaV3_6G039330/CsaV3_1G033530/CsaV3_1G038710/CsaV3_1G031130/CsaV3_6G049070/CsaV3_6G009480/CsaV3_3G028050/CsaV3_5G036030/CsaV3_3G046100/CsaV3_7G023780/CsaV3_3G012800/CsaV3_4G002860/CsaV3_1G038690/CsaV3_7G006290/CsaV3_3G010940/CsaV3_1G044520/CsaV3_6G022090/CsaV3_6G034010/CsaV3_3G017490/CsaV3_2G029200/CsaV3_3G033350/CsaV3_7G001990/CsaV3_4G009310/CsaV3_3G040820/CsaV3_7G028550/CsaV3_4G036210/CsaV3_3G0…	csv:101212721/csv:101202796/csv:101221822/csv:101213684/csv:101218270/csv:101220822/csv:101214428/csv:101203809/csv:101211964/csv:101218013/csv:101220878/csv:101220633/csv:101207890/csv:101216389/csv:101213966/csv:101206605/csv:101213216/csv:101203511/csv:101210914/csv:101210316/csv:101205651/csv:101220131/csv:101216389/csv:101207567/csv:101217959/csv:101217359/csv:101216651/csv:101205429/csv:101…	90	40	CsaV3_6G039330/CsaV3_3G046100/CsaV3_7G023780/CsaV3_7G006290/CsaV3_3G010940/CsaV3_6G022090/CsaV3_3G017490/CsaV3_2G029200/CsaV3_4G036210/CsaV3_4G006200/CsaV3_2G007530/CsaV3_1G042850/CsaV3_1G038860/CsaV3_3G003160/CsaV3_6G032360/CsaV3_2G010830/CsaV3_3G028080/CsaV3_1G033910/CsaV3_5G038390/CsaV3_7G008650/CsaV3_2G016880/CsaV3_1G033200/CsaV3_5G002510/CsaV3_6G000830/CsaV3_3G008110/CsaV3_4G003590/CsaV3_4G0…	50	CsaV3_1G033530/CsaV3_1G038710/CsaV3_1G031130/CsaV3_6G049070/CsaV3_6G009480/CsaV3_3G028050/CsaV3_5G036030/CsaV3_3G012800/CsaV3_4G002860/CsaV3_1G038690/CsaV3_1G044520/CsaV3_6G034010/CsaV3_3G033350/CsaV3_7G001990/CsaV3_4G009310/CsaV3_3G040820/CsaV3_7G028550/CsaV3_3G042240/CsaV3_6G038920/CsaV3_6G047100/CsaV3_1G005040/CsaV3_4G003420/CsaV3_3G032970/CsaV3_3G016490/CsaV3_5G000590/CsaV3_5G018740/CsaV3_4G0…
csv01230	Biosynthesis of amino acids	125/2412	204/4184	0.158139	0.940251	CsaV3_6G045310/CsaV3_6G044190/CsaV3_2G011710/CsaV3_7G006730/CsaV3_3G040500/CsaV3_2G015280/CsaV3_3G018240/CsaV3_5G038370/CsaV3_5G015330/CsaV3_3G043270/CsaV3_1G000670/CsaV3_5G003980/CsaV3_5G031200/CsaV3_3G035920/CsaV3_3G009790/CsaV3_5G030130/CsaV3_3G043020/CsaV3_6G040390/CsaV3_6G036360/CsaV3_6G001210/CsaV3_2G033650/CsaV3_2G014210/CsaV3_5G031220/CsaV3_7G002440/CsaV3_2G025820/CsaV3_6G040330/CsaV3_7G0…	CsaV3_6G045310/CsaV3_6G044190/CsaV3_2G011710/CsaV3_7G006730/CsaV3_3G040500/CsaV3_2G015280/CsaV3_3G018240/CsaV3_5G038370/CsaV3_5G015330/CsaV3_3G043270/CsaV3_1G000670/CsaV3_5G003980/CsaV3_5G031200/CsaV3_3G035920/CsaV3_3G009790/CsaV3_5G030130/CsaV3_3G043020/CsaV3_6G040390/CsaV3_6G036360/CsaV3_6G001210/CsaV3_2G033650/CsaV3_2G014210/CsaV3_5G031220/CsaV3_7G002440/CsaV3_2G025820/CsaV3_6G040330/CsaV3_7G0…	csv:101207177/csv:101223180/csv:101215910/csv:101221603/csv:101203129/csv:101204323/csv:101221689/csv:101203315/csv:101210521/csv:101222321/csv:101215982/csv:101215470/csv:101213570/csv:101219631/csv:101215805/csv:101216623/csv:101222636/csv:101208322/csv:101205929/csv:101214545/csv:101216470/csv:101213242/csv:101220645/csv:101215121/csv:101214004/csv:101206620/csv:101212146/csv:101219476/csv:101…	125	72	CsaV3_6G044190/CsaV3_7G006730/CsaV3_2G015280/CsaV3_5G038370/CsaV3_5G015330/CsaV3_3G043270/CsaV3_1G000670/CsaV3_5G003980/CsaV3_5G031200/CsaV3_3G035920/CsaV3_3G009790/CsaV3_5G030130/CsaV3_5G031220/CsaV3_7G002440/CsaV3_2G025820/CsaV3_7G021470/CsaV3_6G000650/CsaV3_2G017780/CsaV3_3G021690/CsaV3_2G030250/CsaV3_4G031290/CsaV3_1G039980/CsaV3_2G017260/CsaV3_7G022960/CsaV3_6G048980/CsaV3_6G047800/CsaV3_2G0…	53	CsaV3_6G045310/CsaV3_2G011710/CsaV3_3G040500/CsaV3_3G018240/CsaV3_3G043020/CsaV3_6G040390/CsaV3_6G036360/CsaV3_6G001210/CsaV3_2G033650/CsaV3_2G014210/CsaV3_6G040330/CsaV3_7G033940/CsaV3_UNG000020/CsaV3_5G014440/CsaV3_4G013550/CsaV3_2G017660/CsaV3_4G000360/CsaV3_2G014950/CsaV3_6G047780/CsaV3_7G005980/CsaV3_7G021780/CsaV3_3G000370/CsaV3_3G027930/CsaV3_3G021780/CsaV3_3G039680/CsaV3_4G000040/CsaV3_1G…
csv00360	Phenylalanine metabolism	29/2412	44/4184	0.168338	0.940251	CsaV3_5G003790/CsaV3_5G003800/CsaV3_1G039020/CsaV3_4G002290/CsaV3_4G002310/CsaV3_6G039710/CsaV3_6G039680/CsaV3_7G000860/CsaV3_1G039030/CsaV3_4G000360/CsaV3_6G038140/CsaV3_6G039720/CsaV3_4G002300/CsaV3_4G032000/CsaV3_6G039690/CsaV3_2G032340/CsaV3_6G039700/CsaV3_2G015800/CsaV3_6G015190/CsaV3_3G047470/CsaV3_2G015820/CsaV3_6G039660/CsaV3_1G013270/CsaV3_6G036550/CsaV3_6G039670/CsaV3_6G038150/CsaV3_3G0…	CsaV3_5G003790/CsaV3_5G003800/CsaV3_1G039020/CsaV3_4G002290/CsaV3_4G002310/CsaV3_6G039710/CsaV3_6G039680/CsaV3_7G000860/CsaV3_1G039030/CsaV3_4G000360/CsaV3_6G038140/CsaV3_6G039720/CsaV3_4G002300/CsaV3_4G032000/CsaV3_6G039690/CsaV3_2G032340/CsaV3_6G039700/CsaV3_2G015800/CsaV3_6G015190/CsaV3_3G047470/CsaV3_2G015820/CsaV3_6G039660/CsaV3_1G013270/CsaV3_6G036550/CsaV3_6G039670/CsaV3_6G038150/CsaV3_3G0…	csv:101213059/csv:101212818/csv:101209171/csv:101203846/csv:101203846/csv:101218617/csv:101218382/csv:101204792/csv:101209418/csv:101212914/csv:101222232/csv:101219091/csv:101203846/csv:101215051/csv:101218617/csv:101213342/csv:101222092/csv:101214819/csv:101221092/csv:101213892/csv:101215057/csv:101217907/csv:101217299/csv:101206890/csv:101218382/csv:101222468/csv:101205061/csv:101203846/csv:101…	29	13	CsaV3_5G003790/CsaV3_5G003800/CsaV3_1G039020/CsaV3_1G039030/CsaV3_4G032000/CsaV3_2G032340/CsaV3_2G015800/CsaV3_6G015190/CsaV3_3G047470/CsaV3_2G015820/CsaV3_6G039670/CsaV3_6G038150/CsaV3_3G028450	16	CsaV3_4G002290/CsaV3_4G002310/CsaV3_6G039710/CsaV3_6G039680/CsaV3_7G000860/CsaV3_4G000360/CsaV3_6G038140/CsaV3_6G039720/CsaV3_4G002300/CsaV3_6G039690/CsaV3_6G039700/CsaV3_6G039660/CsaV3_1G013270/CsaV3_6G036550/CsaV3_4G002320/CsaV3_1G040750
csv03010	Ribosome	170/2412	281/4184	0.174063	0.940251	CsaV3_4G032310/CsaV3_5G010420/CsaV3_2G011490/CsaV3_3G015540/CsaV3_2G032810/CsaV3_5G030340/CsaV3_5G025010/CsaV3_5G032570/CsaV3_5G005100/CsaV3_1G014020/CsaV3_1G038670/CsaV3_2G001240/CsaV3_3G040630/CsaV3_5G006850/CsaV3_2G001590/CsaV3_5G008980/CsaV3_5G026180/CsaV3_6G021530/CsaV3_1G014820/CsaV3_1G032790/CsaV3_6G002760/CsaV3_3G039740/CsaV3_3G001030/CsaV3_4G024340/CsaV3_3G018990/CsaV3_3G003150/CsaV3_1G0…	CsaV3_4G032310/CsaV3_5G010420/CsaV3_2G011490/CsaV3_3G015540/CsaV3_2G032810/CsaV3_5G030340/CsaV3_5G025010/CsaV3_5G032570/CsaV3_5G005100/CsaV3_1G014020/CsaV3_1G038670/CsaV3_2G001240/CsaV3_3G040630/CsaV3_5G006850/CsaV3_2G001590/CsaV3_5G008980/CsaV3_5G026180/CsaV3_6G021530/CsaV3_1G014820/CsaV3_1G032790/CsaV3_6G002760/CsaV3_3G039740/CsaV3_3G001030/CsaV3_4G024340/CsaV3_3G018990/CsaV3_3G003150/CsaV3_1G0…	csv:101219899/csv:101205050/csv:101213988/csv:101205048/csv:105434676/csv:101211875/csv:101203885/csv:101220020/csv:101218701/csv:101216309/csv:105436293/csv:101208315/csv:101205251/csv:101222977/csv:101202839/csv:101214032/csv:101220542/csv:101213502/csv:101205570/csv:101207271/csv:101211495/csv:101210000/csv:101212331/csv:101223182/csv:101220038/csv:101222584/csv:101215650/csv:101213502/csv:101…	170	17	CsaV3_4G031980/novel.376/CsaV3_7G021070/CsaV3_UNG232200/CsaV3_5G001930/CsaV3_3G045380/CsaV3_6G016780/CsaV3_3G007620/CsaV3_3G031960/CsaV3_4G009740/CsaV3_4G001000/CsaV3_3G002360/CsaV3_3G032030/CsaV3_1G029200/CsaV3_6G004950/CsaV3_3G008690/CsaV3_5G012820	153	CsaV3_4G032310/CsaV3_5G010420/CsaV3_2G011490/CsaV3_3G015540/CsaV3_2G032810/CsaV3_5G030340/CsaV3_5G025010/CsaV3_5G032570/CsaV3_5G005100/CsaV3_1G014020/CsaV3_1G038670/CsaV3_2G001240/CsaV3_3G040630/CsaV3_5G006850/CsaV3_2G001590/CsaV3_5G008980/CsaV3_5G026180/CsaV3_6G021530/CsaV3_1G014820/CsaV3_1G032790/CsaV3_6G002760/CsaV3_3G039740/CsaV3_3G001030/CsaV3_4G024340/CsaV3_3G018990/CsaV3_3G003150/CsaV3_1G0…
csv03050	Proteasome	31/2412	48/4184	0.203735	0.940251	CsaV3_7G025230/CsaV3_3G003990/CsaV3_6G034220/CsaV3_2G007490/CsaV3_1G046270/CsaV3_6G047290/CsaV3_2G002590/CsaV3_4G025500/CsaV3_5G039100/CsaV3_3G013100/CsaV3_7G031810/CsaV3_2G017820/CsaV3_3G034050/CsaV3_2G028900/CsaV3_2G008010/CsaV3_4G031710/CsaV3_7G003090/CsaV3_6G016920/CsaV3_2G029040/CsaV3_6G013170/CsaV3_7G001120/CsaV3_5G037190/CsaV3_2G031230/CsaV3_3G000690/CsaV3_2G006720/CsaV3_4G006830/CsaV3_2G0…	CsaV3_7G025230/CsaV3_3G003990/CsaV3_6G034220/CsaV3_2G007490/CsaV3_1G046270/CsaV3_6G047290/CsaV3_2G002590/CsaV3_4G025500/CsaV3_5G039100/CsaV3_3G013100/CsaV3_7G031810/CsaV3_2G017820/CsaV3_3G034050/CsaV3_2G028900/CsaV3_2G008010/CsaV3_4G031710/CsaV3_7G003090/CsaV3_6G016920/CsaV3_2G029040/CsaV3_6G013170/CsaV3_7G001120/CsaV3_5G037190/CsaV3_2G031230/CsaV3_3G000690/CsaV3_2G006720/CsaV3_4G006830/CsaV3_2G0…	csv:101206991/csv:101205528/csv:101218171/csv:101220370/csv:101218476/csv:101221038/csv:101204697/csv:101209201/csv:101212869/csv:105434835/csv:101215578/csv:101213616/csv:101215586/csv:101215076/csv:101209885/csv:101219417/csv:101206940/csv:101222090/csv:101212516/csv:101221619/csv:101210117/csv:101218854/csv:101208696/csv:101218002/csv:101210367/csv:101207684/csv:101213742/csv:101212741/csv:101…	31	4	CsaV3_3G003990/CsaV3_2G007490/CsaV3_2G011480/CsaV3_5G030400	27	CsaV3_7G025230/CsaV3_6G034220/CsaV3_1G046270/CsaV3_6G047290/CsaV3_2G002590/CsaV3_4G025500/CsaV3_5G039100/CsaV3_3G013100/CsaV3_7G031810/CsaV3_2G017820/CsaV3_3G034050/CsaV3_2G028900/CsaV3_2G008010/CsaV3_4G031710/CsaV3_7G003090/CsaV3_6G016920/CsaV3_2G029040/CsaV3_6G013170/CsaV3_7G001120/CsaV3_5G037190/CsaV3_2G031230/CsaV3_3G000690/CsaV3_2G006720/CsaV3_4G006830/CsaV3_6G021700/CsaV3_6G031560/CsaV3_6G0…
csv04145	Phagosome	40/2412	63/4184	0.207559	0.940251	CsaV3_1G037170/CsaV3_6G021770/CsaV3_3G034310/CsaV3_2G024270/CsaV3_1G009720/CsaV3_3G043190/CsaV3_4G008230/CsaV3_1G009950/CsaV3_6G036650/CsaV3_7G023490/CsaV3_4G025920/CsaV3_7G033960/CsaV3_7G034220/CsaV3_4G002420/CsaV3_4G017500/CsaV3_6G021470/CsaV3_3G039230/CsaV3_2G002140/CsaV3_3G007400/CsaV3_2G006990/CsaV3_3G040000/CsaV3_7G021710/CsaV3_6G050550/CsaV3_1G042520/CsaV3_7G033950/CsaV3_3G041630/CsaV3_3G0…	CsaV3_1G037170/CsaV3_6G021770/CsaV3_3G034310/CsaV3_2G024270/CsaV3_1G009720/CsaV3_3G043190/CsaV3_4G008230/CsaV3_1G009950/CsaV3_6G036650/CsaV3_7G023490/CsaV3_4G025920/CsaV3_7G033960/CsaV3_7G034220/CsaV3_4G002420/CsaV3_4G017500/CsaV3_6G021470/CsaV3_3G039230/CsaV3_2G002140/CsaV3_3G007400/CsaV3_2G006990/CsaV3_3G040000/CsaV3_7G021710/CsaV3_6G050550/CsaV3_1G042520/CsaV3_7G033950/CsaV3_3G041630/CsaV3_3G0…	csv:101209837/csv:101211539/csv:101218443/csv:101216083/csv:101220011/csv:101204049/csv:101206918/csv:101207554/csv:101217735/csv:101218255/csv:101210703/csv:101211666/csv:101208227/csv:101203114/csv:101218331/csv:101216514/csv:101206918/csv:101209852/csv:101220008/csv:101205515/csv:101217015/csv:101221762/csv:101218591/csv:101215239/csv:101211666/csv:101203260/csv:101208227/csv:101216234/csv:101…	40	21	CsaV3_1G037170/CsaV3_6G021770/CsaV3_3G043190/CsaV3_6G036650/CsaV3_7G023490/CsaV3_7G033960/CsaV3_4G002420/CsaV3_3G007400/CsaV3_2G006990/CsaV3_3G040000/CsaV3_3G041630/CsaV3_3G030880/CsaV3_7G033710/CsaV3_3G026760/CsaV3_1G040420/CsaV3_2G029310/CsaV3_2G024650/CsaV3_3G035760/CsaV3_5G002840/CsaV3_3G046610/CsaV3_2G029320	19	CsaV3_3G034310/CsaV3_2G024270/CsaV3_1G009720/CsaV3_4G008230/CsaV3_1G009950/CsaV3_4G025920/CsaV3_7G034220/CsaV3_4G017500/CsaV3_6G021470/CsaV3_3G039230/CsaV3_2G002140/CsaV3_7G021710/CsaV3_6G050550/CsaV3_1G042520/CsaV3_7G033950/CsaV3_3G017070/CsaV3_1G046470/CsaV3_2G017730/CsaV3_5G013590
csv00062	Fatty acid elongation	15/2412	22/4184	0.217531	0.940251	CsaV3_1G031130/CsaV3_3G006860/CsaV3_6G022090/CsaV3_4G036210/CsaV3_3G016490/CsaV3_3G008950/CsaV3_1G012760/CsaV3_1G033910/CsaV3_3G043140/CsaV3_5G030680/CsaV3_2G028690/CsaV3_4G024940/CsaV3_5G004490/CsaV3_6G022170/CsaV3_3G012730	CsaV3_1G031130/CsaV3_3G006860/CsaV3_6G022090/CsaV3_4G036210/CsaV3_3G016490/CsaV3_3G008950/CsaV3_1G012760/CsaV3_1G033910/CsaV3_3G043140/CsaV3_5G030680/CsaV3_2G028690/CsaV3_4G024940/CsaV3_5G004490/CsaV3_6G022170/CsaV3_3G012730	csv:101213684/csv:101214048/csv:101213216/csv:101217359/csv:101215310/csv:101222848/csv:101215312/csv:101209161/csv:101221849/csv:101206427/csv:101217470/csv:101213758/csv:101222043/csv:101212013/csv:101219531	15	10	CsaV3_6G022090/CsaV3_4G036210/CsaV3_3G008950/CsaV3_1G012760/CsaV3_1G033910/CsaV3_5G030680/CsaV3_2G028690/CsaV3_5G004490/CsaV3_6G022170/CsaV3_3G012730	5	CsaV3_1G031130/CsaV3_3G006860/CsaV3_3G016490/CsaV3_3G043140/CsaV3_4G024940
csv03013	RNA transport	88/2412	144/4184	0.221184	0.940251	CsaV3_5G025930/CsaV3_3G036430/CsaV3_2G032030/CsaV3_3G010520/CsaV3_5G025900/CsaV3_7G021830/CsaV3_2G015740/CsaV3_4G027730/CsaV3_3G041110/CsaV3_1G040360/CsaV3_3G031460/CsaV3_3G046890/CsaV3_1G029700/CsaV3_7G021200/CsaV3_1G029790/CsaV3_7G033540/novel.950/CsaV3_3G023730/CsaV3_7G034670/CsaV3_1G032830/CsaV3_3G005110/CsaV3_2G011610/CsaV3_7G022370/CsaV3_6G043210/CsaV3_3G004860/CsaV3_2G035660/CsaV3_6G009050…	CsaV3_5G025930/CsaV3_3G036430/CsaV3_2G032030/CsaV3_3G010520/CsaV3_5G025900/CsaV3_7G021830/CsaV3_2G015740/CsaV3_4G027730/CsaV3_3G041110/CsaV3_1G040360/CsaV3_3G031460/CsaV3_3G046890/CsaV3_1G029700/CsaV3_7G021200/CsaV3_1G029790/CsaV3_7G033540/-/CsaV3_3G023730/CsaV3_7G034670/CsaV3_1G032830/CsaV3_3G005110/CsaV3_2G011610/CsaV3_7G022370/CsaV3_6G043210/CsaV3_3G004860/CsaV3_2G035660/CsaV3_6G009050/CsaV3_3…	csv:105434427/csv:101203793/csv:101217346/csv:101222372/csv:101220517/csv:101202908/csv:101214334/csv:101205199/csv:101211648/csv:101209997/csv:101222664/csv:101221977/csv:101211465/csv:101216475/csv:101211465/csv:101217593/csv:101217101/csv:101205997/csv:101221456/csv:101206312/csv:101214921/csv:101215193/csv:101209681/csv:101217035/csv:101220230/csv:101208997/csv:101215672/csv:101219802/csv:101…	88	34	CsaV3_5G025900/CsaV3_2G015740/CsaV3_1G040360/CsaV3_3G031460/CsaV3_7G034670/CsaV3_6G043210/CsaV3_3G004860/CsaV3_2G035660/CsaV3_3G018370/CsaV3_5G026020/CsaV3_5G025920/CsaV3_1G033610/CsaV3_1G040370/CsaV3_7G024240/CsaV3_6G004880/CsaV3_7G034250/CsaV3_1G044360/CsaV3_1G014460/CsaV3_1G044620/CsaV3_7G023140/CsaV3_UNG186470/CsaV3_5G024790/CsaV3_6G001680/CsaV3_7G024640/CsaV3_5G000380/CsaV3_3G018690/CsaV3_1G…	54	CsaV3_5G025930/CsaV3_3G036430/CsaV3_2G032030/CsaV3_3G010520/CsaV3_7G021830/CsaV3_4G027730/CsaV3_3G041110/CsaV3_3G046890/CsaV3_1G029700/CsaV3_7G021200/CsaV3_1G029790/CsaV3_7G033540/novel.950/CsaV3_3G023730/CsaV3_1G032830/CsaV3_3G005110/CsaV3_2G011610/CsaV3_7G022370/CsaV3_6G009050/CsaV3_1G031140/CsaV3_3G020490/CsaV3_1G023010/CsaV3_4G030950/CsaV3_1G029680/CsaV3_6G046130/CsaV3_1G003560/CsaV3_5G024250…
csv04016	MAPK signaling pathway - plant	75/2412	123/4184	0.253753	0.940251	CsaV3_2G016430/CsaV3_6G031490/CsaV3_1G033530/CsaV3_7G025250/CsaV3_6G052820/CsaV3_3G002220/CsaV3_3G012390/CsaV3_7G006290/CsaV3_4G030060/CsaV3_3G012170/CsaV3_6G045260/CsaV3_3G033350/CsaV3_4G030050/CsaV3_4G009310/CsaV3_4G035560/CsaV3_1G007340/CsaV3_6G001340/CsaV3_4G035580/CsaV3_3G042770/CsaV3_3G049150/CsaV3_4G036070/CsaV3_6G039650/CsaV3_6G048850/CsaV3_5G000620/CsaV3_3G000410/CsaV3_1G038860/CsaV3_3G0…	CsaV3_2G016430/CsaV3_6G031490/CsaV3_1G033530/CsaV3_7G025250/CsaV3_6G052820/CsaV3_3G002220/CsaV3_3G012390/CsaV3_7G006290/CsaV3_4G030060/CsaV3_3G012170/CsaV3_6G045260/CsaV3_3G033350/CsaV3_4G030050/CsaV3_4G009310/CsaV3_4G035560/CsaV3_1G007340/CsaV3_6G001340/CsaV3_4G035580/CsaV3_3G042770/CsaV3_3G049150/CsaV3_4G036070/CsaV3_6G039650/CsaV3_6G048850/CsaV3_5G000620/CsaV3_3G000410/CsaV3_1G038860/CsaV3_3G0…	csv:101214276/csv:101216662/csv:101202796/csv:101210262/csv:101205642/csv:101207431/csv:101213967/csv:101216389/csv:101209540/csv:101210326/csv:101206218/csv:101205651/csv:101204472/csv:101216389/csv:101214314/csv:101203133/csv:101220425/csv:101207734/csv:101217978/csv:101218165/csv:101214637/csv:101217515/csv:101210574/csv:101221554/csv:101222731/csv:101206498/csv:101207154/csv:101204301/csv:101…	75	46	CsaV3_2G016430/CsaV3_6G031490/CsaV3_7G025250/CsaV3_6G052820/CsaV3_3G002220/CsaV3_3G012390/CsaV3_7G006290/CsaV3_4G030060/CsaV3_6G045260/CsaV3_4G030050/CsaV3_1G007340/CsaV3_3G049150/CsaV3_4G036070/CsaV3_6G039650/CsaV3_5G000620/CsaV3_1G038860/CsaV3_3G046430/CsaV3_6G032360/CsaV3_6G032130/CsaV3_1G042150/CsaV3_3G027970/CsaV3_1G040690/CsaV3_6G005310/CsaV3_2G029000/CsaV3_6G005320/CsaV3_3G033450/CsaV3_1G0…	29	CsaV3_1G033530/CsaV3_3G012170/CsaV3_3G033350/CsaV3_4G009310/CsaV3_4G035560/CsaV3_6G001340/CsaV3_4G035580/CsaV3_3G042770/CsaV3_6G048850/CsaV3_3G000410/CsaV3_3G015240/CsaV3_2G009260/CsaV3_6G051540/CsaV3_6G047720/CsaV3_7G008840/CsaV3_7G029600/CsaV3_1G004720/CsaV3_6G040420/CsaV3_2G005240/CsaV3_2G002930/CsaV3_1G041870/CsaV3_3G043480/CsaV3_4G005480/CsaV3_4G030260/CsaV3_3G022370/CsaV3_5G002350/CsaV3_6G0…
csv00260	Glycine, serine and threonine metabolism	44/2412	71/4184	0.268163	0.940251	CsaV3_2G011710/CsaV3_6G039090/CsaV3_1G043170/CsaV3_5G003790/CsaV3_5G003800/CsaV3_3G018240/CsaV3_4G026970/CsaV3_6G000070/CsaV3_3G043270/CsaV3_5G031200/CsaV3_1G001830/CsaV3_5G031220/CsaV3_7G001060/CsaV3_UNG000020/CsaV3_5G014440/CsaV3_4G013550/CsaV3_2G017260/CsaV3_6G038140/CsaV3_3G033240/CsaV3_4G004900/CsaV3_3G000370/CsaV3_1G044710/CsaV3_2G024880/CsaV3_7G034360/CsaV3_2G025570/CsaV3_5G038950/CsaV3_UN…	CsaV3_2G011710/CsaV3_6G039090/CsaV3_1G043170/CsaV3_5G003790/CsaV3_5G003800/CsaV3_3G018240/CsaV3_4G026970/CsaV3_6G000070/CsaV3_3G043270/CsaV3_5G031200/CsaV3_1G001830/CsaV3_5G031220/CsaV3_7G001060/CsaV3_UNG000020/CsaV3_5G014440/CsaV3_4G013550/CsaV3_2G017260/CsaV3_6G038140/CsaV3_3G033240/CsaV3_4G004900/CsaV3_3G000370/CsaV3_1G044710/CsaV3_2G024880/CsaV3_7G034360/CsaV3_2G025570/CsaV3_5G038950/CsaV3_UN…	csv:101215910/csv:101207975/csv:101217893/csv:101213059/csv:101212818/csv:101221689/csv:101210304/csv:101207718/csv:101222321/csv:101213570/csv:101213657/csv:101220645/csv:101209132/csv:101205504/csv:101206329/csv:101217925/csv:101209304/csv:101222232/csv:101203709/csv:101208662/csv:101202934/csv:101220286/csv:101207914/csv:101205436/csv:101217746/csv:101219640/csv:101208662/csv:101212892/csv:101…	44	34	CsaV3_6G039090/CsaV3_1G043170/CsaV3_5G003790/CsaV3_5G003800/CsaV3_4G026970/CsaV3_6G000070/CsaV3_3G043270/CsaV3_5G031200/CsaV3_1G001830/CsaV3_5G031220/CsaV3_7G001060/CsaV3_2G017260/CsaV3_3G033240/CsaV3_4G004900/CsaV3_2G024880/CsaV3_7G034360/CsaV3_2G025570/CsaV3_5G038950/CsaV3_UNG183400/CsaV3_4G007440/CsaV3_5G039900/CsaV3_5G024880/CsaV3_3G015370/CsaV3_1G045310/CsaV3_7G032960/CsaV3_1G022960/CsaV3_6G…	10	CsaV3_2G011710/CsaV3_3G018240/CsaV3_UNG000020/CsaV3_5G014440/CsaV3_4G013550/CsaV3_6G038140/CsaV3_3G000370/CsaV3_1G044710/CsaV3_4G028640/CsaV3_3G047160
csv00906	Carotenoid biosynthesis	20/2412	31/4184	0.278545	0.940251	CsaV3_2G016630/CsaV3_4G017450/CsaV3_4G023380/CsaV3_4G007180/CsaV3_3G017450/CsaV3_5G020340/CsaV3_1G045650/CsaV3_4G022080/CsaV3_4G034320/CsaV3_3G007050/CsaV3_4G000740/CsaV3_4G007760/CsaV3_5G024720/CsaV3_6G051790/CsaV3_4G007140/CsaV3_4G007560/CsaV3_4G002690/CsaV3_2G027780/CsaV3_2G013780/CsaV3_4G003370	CsaV3_2G016630/CsaV3_4G017450/CsaV3_4G023380/CsaV3_4G007180/CsaV3_3G017450/CsaV3_5G020340/CsaV3_1G045650/CsaV3_4G022080/CsaV3_4G034320/CsaV3_3G007050/CsaV3_4G000740/CsaV3_4G007760/CsaV3_5G024720/CsaV3_6G051790/CsaV3_4G007140/CsaV3_4G007560/CsaV3_4G002690/CsaV3_2G027780/CsaV3_2G013780/CsaV3_4G003370	csv:101212903/csv:101219033/csv:101216484/csv:101220226/csv:101212140/csv:101206471/csv:101210522/csv:101207778/csv:101213916/csv:101215492/csv:105435153/csv:101219505/csv:101219413/csv:101214535/csv:101212508/csv:101214823/csv:101209155/csv:101220320/csv:101219340/csv:101211624	20	19	CsaV3_2G016630/CsaV3_4G017450/CsaV3_4G023380/CsaV3_3G017450/CsaV3_5G020340/CsaV3_1G045650/CsaV3_4G022080/CsaV3_4G034320/CsaV3_3G007050/CsaV3_4G000740/CsaV3_4G007760/CsaV3_5G024720/CsaV3_6G051790/CsaV3_4G007140/CsaV3_4G007560/CsaV3_4G002690/CsaV3_2G027780/CsaV3_2G013780/CsaV3_4G003370	1	CsaV3_4G007180
csv03430	Mismatch repair	20/2412	31/4184	0.278545	0.940251	CsaV3_6G016510/CsaV3_3G017020/CsaV3_3G046980/CsaV3_1G003630/CsaV3_1G006450/CsaV3_5G005690/CsaV3_1G007030/CsaV3_5G035370/CsaV3_7G029150/CsaV3_6G014300/CsaV3_1G002970/CsaV3_3G037350/CsaV3_5G008820/CsaV3_2G002320/CsaV3_1G032850/CsaV3_6G034260/CsaV3_UNG115920/CsaV3_6G038660/CsaV3_3G038830/CsaV3_1G031640	CsaV3_6G016510/CsaV3_3G017020/CsaV3_3G046980/CsaV3_1G003630/CsaV3_1G006450/CsaV3_5G005690/CsaV3_1G007030/CsaV3_5G035370/CsaV3_7G029150/CsaV3_6G014300/CsaV3_1G002970/CsaV3_3G037350/CsaV3_5G008820/CsaV3_2G002320/CsaV3_1G032850/CsaV3_6G034260/CsaV3_UNG115920/CsaV3_6G038660/CsaV3_3G038830/CsaV3_1G031640	csv:101208473/csv:101214720/csv:101220176/csv:101215589/csv:101210420/csv:101209940/csv:101208542/csv:101205315/csv:101210654/csv:101213447/csv:101208545/csv:101203835/csv:101213310/csv:101210755/csv:101214177/csv:101217230/csv:101221224/csv:101204361/csv:101221438/csv:101219981	20	5	CsaV3_5G005690/CsaV3_3G037350/CsaV3_1G032850/CsaV3_3G038830/CsaV3_1G031640	15	CsaV3_6G016510/CsaV3_3G017020/CsaV3_3G046980/CsaV3_1G003630/CsaV3_1G006450/CsaV3_1G007030/CsaV3_5G035370/CsaV3_7G029150/CsaV3_6G014300/CsaV3_1G002970/CsaV3_5G008820/CsaV3_2G002320/CsaV3_6G034260/CsaV3_UNG115920/CsaV3_6G038660
csv04144	Endocytosis	88/2412	146/4184	0.2859	0.940251	CsaV3_6G003390/CsaV3_4G001530/CsaV3_6G037410/CsaV3_4G024840/CsaV3_5G027290/CsaV3_1G033100/CsaV3_7G024760/CsaV3_3G049140/CsaV3_7G002160/CsaV3_4G031000/CsaV3_3G009580/CsaV3_1G045850/CsaV3_6G047650/CsaV3_7G032480/CsaV3_3G011990/CsaV3_3G006490/CsaV3_6G051030/CsaV3_7G005760/CsaV3_6G005980/CsaV3_6G036650/CsaV3_7G023490/CsaV3_5G015210/CsaV3_3G035010/CsaV3_2G011210/CsaV3_3G003480/CsaV3_3G020580/CsaV3_6G0…	CsaV3_6G003390/CsaV3_4G001530/CsaV3_6G037410/CsaV3_4G024840/CsaV3_5G027290/CsaV3_1G033100/CsaV3_7G024760/CsaV3_3G049140/CsaV3_7G002160/CsaV3_4G031000/CsaV3_3G009580/CsaV3_1G045850/CsaV3_6G047650/CsaV3_7G032480/CsaV3_3G011990/CsaV3_3G006490/CsaV3_6G051030/CsaV3_7G005760/CsaV3_6G005980/CsaV3_6G036650/CsaV3_7G023490/CsaV3_5G015210/CsaV3_3G035010/CsaV3_2G011210/CsaV3_3G003480/CsaV3_3G020580/CsaV3_6G0…	csv:101211044/csv:101215246/csv:101215596/csv:101215599/csv:105435011/csv:101203665/csv:101212307/csv:101217929/csv:101212521/csv:101205685/csv:101212194/csv:101214261/csv:101215810/csv:101206113/csv:101212041/csv:101207947/csv:101212843/csv:101209668/csv:101218942/csv:101217735/csv:101218255/csv:101221303/csv:101203303/csv:101210094/csv:101208016/csv:105434874/csv:101210407/csv:101220964/csv:101…	88	34	CsaV3_4G001530/CsaV3_6G037410/CsaV3_5G027290/CsaV3_4G031000/CsaV3_1G045850/CsaV3_6G051030/CsaV3_7G005760/CsaV3_6G036650/CsaV3_7G023490/CsaV3_5G015210/CsaV3_6G049840/CsaV3_2G006790/CsaV3_6G052350/CsaV3_1G037330/CsaV3_2G003270/CsaV3_5G024830/CsaV3_6G043530/CsaV3_6G001460/CsaV3_4G028490/CsaV3_5G003600/CsaV3_6G013060/CsaV3_6G052700/CsaV3_1G013580/CsaV3_4G002260/CsaV3_3G044060/CsaV3_5G023080/CsaV3_3G0…	54	CsaV3_6G003390/CsaV3_4G024840/CsaV3_1G033100/CsaV3_7G024760/CsaV3_3G049140/CsaV3_7G002160/CsaV3_3G009580/CsaV3_6G047650/CsaV3_7G032480/CsaV3_3G011990/CsaV3_3G006490/CsaV3_6G005980/CsaV3_3G035010/CsaV3_2G011210/CsaV3_3G003480/CsaV3_3G020580/CsaV3_5G034180/CsaV3_2G033270/CsaV3_3G032290/CsaV3_3G042530/CsaV3_5G026450/CsaV3_3G001690/CsaV3_5G036790/CsaV3_5G031510/CsaV3_4G029110/CsaV3_2G016000/CsaV3_6G0…
csv00270	Cysteine and methionine metabolism	62/2412	102/4184	0.293306	0.940251	CsaV3_6G028390/CsaV3_7G027790/CsaV3_3G040500/CsaV3_3G018240/CsaV3_4G026970/CsaV3_3G028000/CsaV3_6G044520/CsaV3_5G030130/CsaV3_3G043020/CsaV3_6G015400/CsaV3_3G012920/CsaV3_1G005050/CsaV3_2G012760/CsaV3_2G025820/CsaV3_7G028870/CsaV3_6G000650/CsaV3_5G014440/CsaV3_3G010720/CsaV3_2G013400/CsaV3_3G007460/CsaV3_3G033240/CsaV3_4G008360/CsaV3_6G047800/CsaV3_4G004900/CsaV3_6G048630/CsaV3_3G000370/CsaV3_1G0…	CsaV3_6G028390/CsaV3_7G027790/CsaV3_3G040500/CsaV3_3G018240/CsaV3_4G026970/CsaV3_3G028000/CsaV3_6G044520/CsaV3_5G030130/CsaV3_3G043020/CsaV3_6G015400/CsaV3_3G012920/CsaV3_1G005050/CsaV3_2G012760/CsaV3_2G025820/CsaV3_7G028870/CsaV3_6G000650/CsaV3_5G014440/CsaV3_3G010720/CsaV3_2G013400/CsaV3_3G007460/CsaV3_3G033240/CsaV3_4G008360/CsaV3_6G047800/CsaV3_4G004900/CsaV3_6G048630/CsaV3_3G000370/CsaV3_1G0…	csv:101214377/csv:101221323/csv:101203129/csv:101221689/csv:101210304/csv:101212743/csv:101219252/csv:101216623/csv:101222636/csv:101221653/csv:101222292/csv:101211651/csv:101204387/csv:101214004/csv:101214377/csv:101220896/csv:101206329/csv:101209658/csv:101204622/csv:101221189/csv:101203709/csv:101207078/csv:101214370/csv:101208662/csv:101204103/csv:101202934/csv:101213903/csv:101212693/csv:101…	62	39	CsaV3_4G026970/CsaV3_6G044520/CsaV3_5G030130/CsaV3_6G015400/CsaV3_3G012920/CsaV3_1G005050/CsaV3_2G025820/CsaV3_6G000650/CsaV3_2G013400/CsaV3_3G007460/CsaV3_3G033240/CsaV3_6G047800/CsaV3_4G004900/CsaV3_6G048630/CsaV3_5G000580/CsaV3_6G031510/novel.85/CsaV3_UNG183400/CsaV3_4G033640/CsaV3_5G031670/CsaV3_2G032340/CsaV3_3G000880/CsaV3_5G039900/CsaV3_5G024880/CsaV3_3G019470/CsaV3_4G028410/CsaV3_6G015190…	23	CsaV3_6G028390/CsaV3_7G027790/CsaV3_3G040500/CsaV3_3G018240/CsaV3_3G028000/CsaV3_3G043020/CsaV3_2G012760/CsaV3_7G028870/CsaV3_5G014440/CsaV3_3G010720/CsaV3_4G008360/CsaV3_3G000370/CsaV3_1G002350/CsaV3_3G039680/CsaV3_3G018980/CsaV3_3G001160/CsaV3_5G013990/CsaV3_5G034310/CsaV3_1G042250/CsaV3_1G013270/CsaV3_2G011670/CsaV3_7G032910/CsaV3_6G000890
csv00020	Citrate cycle (TCA cycle)	30/2412	48/4184	0.297585	0.940251	CsaV3_6G028390/CsaV3_5G031990/CsaV3_6G000070/CsaV3_6G044520/CsaV3_1G007500/CsaV3_6G036340/CsaV3_2G012760/CsaV3_7G028870/CsaV3_7G024120/CsaV3_3G048280/CsaV3_3G007460/CsaV3_4G008360/CsaV3_3G043710/CsaV3_6G008320/CsaV3_6G047780/CsaV3_1G002350/CsaV3_6G039730/CsaV3_6G044640/CsaV3_7G021930/CsaV3_5G026370/CsaV3_3G015370/CsaV3_6G028610/CsaV3_4G005080/CsaV3_5G020610/CsaV3_6G031980/CsaV3_6G007900/CsaV3_7G0…	CsaV3_6G028390/CsaV3_5G031990/CsaV3_6G000070/CsaV3_6G044520/CsaV3_1G007500/CsaV3_6G036340/CsaV3_2G012760/CsaV3_7G028870/CsaV3_7G024120/CsaV3_3G048280/CsaV3_3G007460/CsaV3_4G008360/CsaV3_3G043710/CsaV3_6G008320/CsaV3_6G047780/CsaV3_1G002350/CsaV3_6G039730/CsaV3_6G044640/CsaV3_7G021930/CsaV3_5G026370/CsaV3_3G015370/CsaV3_6G028610/CsaV3_4G005080/CsaV3_5G020610/CsaV3_6G031980/CsaV3_6G007900/CsaV3_7G0…	csv:101214377/csv:101208773/csv:101207718/csv:101219252/csv:101206269/csv:101205918/csv:101204387/csv:101214377/csv:101215151/csv:101222382/csv:101221189/csv:101207078/csv:101203257/csv:101215598/csv:101214612/csv:101213903/csv:101219331/csv:101220209/csv:101204042/csv:101208883/csv:101222823/csv:101222110/csv:101211616/csv:101211294/csv:101209539/csv:101220981/csv:101221392/csv:101205496/csv:101…	30	10	CsaV3_6G000070/CsaV3_6G044520/CsaV3_3G048280/CsaV3_3G007460/CsaV3_6G044640/CsaV3_5G026370/CsaV3_3G015370/CsaV3_4G005080/CsaV3_5G020610/CsaV3_2G032870	20	CsaV3_6G028390/CsaV3_5G031990/CsaV3_1G007500/CsaV3_6G036340/CsaV3_2G012760/CsaV3_7G028870/CsaV3_7G024120/CsaV3_4G008360/CsaV3_3G043710/CsaV3_6G008320/CsaV3_6G047780/CsaV3_1G002350/CsaV3_6G039730/CsaV3_7G021930/CsaV3_6G028610/CsaV3_6G031980/CsaV3_6G007900/CsaV3_7G003590/CsaV3_6G007490/CsaV3_5G034210
csv00300	Lysine biosynthesis	187188	834490	0.324948	0.940251	CsaV3_2G033650/CsaV3_5G014440/CsaV3_2G014950/CsaV3_7G021780/CsaV3_5G039900/CsaV3_5G024880/CsaV3_3G009570	CsaV3_2G033650/CsaV3_5G014440/CsaV3_2G014950/CsaV3_7G021780/CsaV3_5G039900/CsaV3_5G024880/CsaV3_3G009570	csv:101216470/csv:101206329/csv:101208417/csv:101222467/csv:101202843/csv:101222001/csv:101211954	7	2	CsaV3_5G039900/CsaV3_5G024880	5	CsaV3_2G033650/CsaV3_5G014440/CsaV3_2G014950/CsaV3_7G021780/CsaV3_3G009570
csv00910	Nitrogen metabolism	19/2412	30/4184	0.330557	0.940251	CsaV3_3G018610/CsaV3_4G013280/CsaV3_3G011860/CsaV3_3G040230/CsaV3_3G027930/CsaV3_7G030560/CsaV3_5G023370/CsaV3_5G023360/CsaV3_3G042440/CsaV3_5G031350/CsaV3_2G026780/CsaV3_3G021030/CsaV3_5G005130/CsaV3_3G037320/CsaV3_6G043980/CsaV3_6G039990/CsaV3_3G044050/CsaV3_2G026770/CsaV3_5G023920	CsaV3_3G018610/CsaV3_4G013280/CsaV3_3G011860/CsaV3_3G040230/CsaV3_3G027930/CsaV3_7G030560/CsaV3_5G023370/CsaV3_5G023360/CsaV3_3G042440/CsaV3_5G031350/CsaV3_2G026780/CsaV3_3G021030/CsaV3_5G005130/CsaV3_3G037320/CsaV3_6G043980/CsaV3_6G039990/CsaV3_3G044050/CsaV3_2G026770/CsaV3_5G023920	csv:101217505/csv:101221948/csv:101205401/csv:101214380/csv:101213224/csv:101213413/csv:101219000/csv:101219000/csv:101213998/csv:101212365/csv:101219000/csv:101221473/csv:101218466/csv:101209642/csv:101206142/csv:101202774/csv:101207765/csv:101219000/csv:101215515	19	9	CsaV3_3G011860/CsaV3_3G040230/CsaV3_7G030560/CsaV3_3G042440/CsaV3_3G021030/CsaV3_5G005130/CsaV3_6G043980/CsaV3_3G044050/CsaV3_5G023920	10	CsaV3_3G018610/CsaV3_4G013280/CsaV3_3G027930/CsaV3_5G023370/CsaV3_5G023360/CsaV3_5G031350/CsaV3_2G026780/CsaV3_3G037320/CsaV3_6G039990/CsaV3_2G026770
csv00480	Glutathione metabolism	46/2412	76/4184	0.348244	0.940251	CsaV3_1G005440/CsaV3_4G036450/CsaV3_3G028000/CsaV3_4G025770/CsaV3_4G025760/CsaV3_5G023890/CsaV3_1G033510/CsaV3_2G032090/CsaV3_5G002680/CsaV3_2G014010/CsaV3_5G002690/CsaV3_3G011090/CsaV3_2G001680/CsaV3_3G020840/CsaV3_6G034310/CsaV3_7G027540/CsaV3_5G000580/CsaV3_6G042080/CsaV3_5G006680/CsaV3_4G007720/CsaV3_5G031670/CsaV3_4G025750/CsaV3_1G004150/CsaV3_5G006450/CsaV3_2G031240/CsaV3_3G027630/CsaV3_7G0…	CsaV3_1G005440/CsaV3_4G036450/CsaV3_3G028000/CsaV3_4G025770/CsaV3_4G025760/CsaV3_5G023890/CsaV3_1G033510/CsaV3_2G032090/CsaV3_5G002680/CsaV3_2G014010/CsaV3_5G002690/CsaV3_3G011090/CsaV3_2G001680/CsaV3_3G020840/CsaV3_6G034310/CsaV3_7G027540/CsaV3_5G000580/CsaV3_6G042080/CsaV3_5G006680/CsaV3_4G007720/CsaV3_5G031670/CsaV3_4G025750/CsaV3_1G004150/CsaV3_5G006450/CsaV3_2G031240/CsaV3_3G027630/CsaV3_7G0…	csv:101203519/csv:101211107/csv:101212743/csv:101214992/csv:101213782/csv:101215747/csv:101203032/csv:101216396/csv:101216008/csv:101217290/csv:101216008/csv:101215496/csv:101221216/csv:101203335/csv:101216755/csv:101217298/csv:101222254/csv:101210105/csv:101203666/csv:101218083/csv:101213410/csv:101214027/csv:101217418/csv:101220995/csv:101208455/csv:101222416/csv:101212536/csv:101203261/csv:101…	46	28	CsaV3_4G036450/CsaV3_2G032090/CsaV3_5G002680/CsaV3_2G014010/CsaV3_5G002690/CsaV3_3G011090/CsaV3_2G001680/CsaV3_3G020840/CsaV3_6G034310/CsaV3_5G000580/CsaV3_5G006680/CsaV3_4G007720/CsaV3_5G031670/CsaV3_5G006450/CsaV3_2G031240/CsaV3_7G029050/CsaV3_3G015450/CsaV3_5G020610/CsaV3_4G002100/CsaV3_7G000930/CsaV3_1G039210/CsaV3_4G025660/CsaV3_4G025650/CsaV3_7G029060/CsaV3_3G035350/CsaV3_6G000030/novel.403…	18	CsaV3_1G005440/CsaV3_3G028000/CsaV3_4G025770/CsaV3_4G025760/CsaV3_5G023890/CsaV3_1G033510/CsaV3_7G027540/CsaV3_6G042080/CsaV3_4G025750/CsaV3_1G004150/CsaV3_3G027630/CsaV3_4G029990/CsaV3_6G047320/CsaV3_4G025630/CsaV3_4G025680/CsaV3_2G024480/CsaV3_5G002900/CsaV3_2G007510
csv00513	Various types of N-glycan biosynthesis	20/2412	32/4184	0.355967	0.940251	CsaV3_4G033140/CsaV3_5G006710/CsaV3_6G031390/CsaV3_3G032600/CsaV3_5G036240/CsaV3_2G014400/CsaV3_3G001340/CsaV3_6G051700/CsaV3_6G049210/CsaV3_5G010300/CsaV3_1G024100/CsaV3_2G009420/CsaV3_7G008560/CsaV3_1G015830/CsaV3_7G018720/CsaV3_7G033750/CsaV3_7G029100/CsaV3_6G004710/CsaV3_7G002510/CsaV3_1G007480	CsaV3_4G033140/CsaV3_5G006710/CsaV3_6G031390/CsaV3_3G032600/CsaV3_5G036240/CsaV3_2G014400/CsaV3_3G001340/CsaV3_6G051700/CsaV3_6G049210/CsaV3_5G010300/CsaV3_1G024100/CsaV3_2G009420/CsaV3_7G008560/CsaV3_1G015830/CsaV3_7G018720/CsaV3_7G033750/CsaV3_7G029100/CsaV3_6G004710/CsaV3_7G002510/CsaV3_1G007480	csv:101208085/csv:101202942/csv:101217990/csv:101211123/csv:101222475/csv:101209991/csv:101204006/csv:101216212/csv:101215332/csv:101207680/csv:101210958/csv:101211792/csv:101205170/csv:101216794/csv:101217309/csv:101215522/csv:101211394/csv:101216230/csv:101213679/csv:101206027	20	5	CsaV3_5G006710/CsaV3_2G009420/CsaV3_7G008560/CsaV3_7G029100/CsaV3_6G004710	15	CsaV3_4G033140/CsaV3_6G031390/CsaV3_3G032600/CsaV3_5G036240/CsaV3_2G014400/CsaV3_3G001340/CsaV3_6G051700/CsaV3_6G049210/CsaV3_5G010300/CsaV3_1G024100/CsaV3_1G015830/CsaV3_7G018720/CsaV3_7G033750/CsaV3_7G002510/CsaV3_1G007480
csv00340	Histidine metabolism	187311	17/4184	0.37024	0.940251	CsaV3_1G001600/CsaV3_6G005330/CsaV3_4G024200/CsaV3_7G034360/CsaV3_5G025000/CsaV3_5G040040/CsaV3_4G032220/CsaV3_4G005260/CsaV3_4G028150/CsaV3_1G019630/CsaV3_7G021940	CsaV3_1G001600/CsaV3_6G005330/CsaV3_4G024200/CsaV3_7G034360/CsaV3_5G025000/CsaV3_5G040040/CsaV3_4G032220/CsaV3_4G005260/CsaV3_4G028150/CsaV3_1G019630/CsaV3_7G021940	csv:101209430/csv:101204289/csv:101205263/csv:101205436/csv:101203648/csv:101205670/csv:101207614/csv:101221321/csv:101219329/csv:101204289/csv:101205184	11	8	CsaV3_1G001600/CsaV3_6G005330/CsaV3_4G024200/CsaV3_7G034360/CsaV3_5G040040/CsaV3_4G005260/CsaV3_4G028150/CsaV3_1G019630	3	CsaV3_5G025000/CsaV3_4G032220/CsaV3_7G021940
csv00780	Biotin metabolism	187219	834551	0.372778	0.940251	CsaV3_1G032580/CsaV3_4G023750/CsaV3_6G003770/CsaV3_6G015580/CsaV3_5G001240/CsaV3_1G042350/CsaV3_3G023700/CsaV3_4G004790	CsaV3_1G032580/CsaV3_4G023750/CsaV3_6G003770/CsaV3_6G015580/CsaV3_5G001240/CsaV3_1G042350/CsaV3_3G023700/CsaV3_4G004790	csv:101210781/csv:101210519/csv:101222084/csv:101220594/csv:101213297/csv:101217385/csv:101206408/csv:101207195	8	3	CsaV3_5G001240/CsaV3_1G042350/CsaV3_3G023700	5	CsaV3_1G032580/CsaV3_4G023750/CsaV3_6G003770/CsaV3_6G015580/CsaV3_4G004790
csv04933	AGE-RAGE signaling pathway in diabetic complications	187219	834551	0.372778	0.940251	CsaV3_5G010130/CsaV3_2G024270/CsaV3_1G036200/CsaV3_2G002140/CsaV3_6G050550/CsaV3_1G036210/CsaV3_6G001840/CsaV3_1G012740	CsaV3_5G010130/CsaV3_2G024270/CsaV3_1G036200/CsaV3_2G002140/CsaV3_6G050550/CsaV3_1G036210/CsaV3_6G001840/CsaV3_1G012740	csv:101212421/csv:101216083/csv:101209542/csv:101209852/csv:101218591/csv:101204232/csv:101203631/csv:101218403	8	4	CsaV3_5G010130/CsaV3_1G036200/CsaV3_1G036210/CsaV3_1G012740	4	CsaV3_2G024270/CsaV3_2G002140/CsaV3_6G050550/CsaV3_6G001840
csv03018	RNA degradation	56/2412	94/4184	0.392917	0.940251	CsaV3_UNG224740/CsaV3_3G042650/CsaV3_3G036430/CsaV3_7G034290/CsaV3_2G016650/CsaV3_1G041580/CsaV3_7G026750/CsaV3_6G040390/CsaV3_6G036430/CsaV3_4G012120/CsaV3_1G039980/CsaV3_6G009310/CsaV3_5G019990/CsaV3_1G001530/CsaV3_3G018370/CsaV3_4G036490/CsaV3_4G008960/CsaV3_6G014010/CsaV3_3G040620/CsaV3_2G012300/CsaV3_7G027140/CsaV3_4G030890/CsaV3_6G040870/CsaV3_2G032410/CsaV3_7G034770/CsaV3_6G004880/CsaV3_5G…	CsaV3_UNG224740/CsaV3_3G042650/CsaV3_3G036430/CsaV3_7G034290/CsaV3_2G016650/CsaV3_1G041580/CsaV3_7G026750/CsaV3_6G040390/CsaV3_6G036430/CsaV3_4G012120/CsaV3_1G039980/CsaV3_6G009310/CsaV3_5G019990/CsaV3_1G001530/CsaV3_3G018370/CsaV3_4G036490/CsaV3_4G008960/CsaV3_6G014010/CsaV3_3G040620/CsaV3_2G012300/CsaV3_7G027140/CsaV3_4G030890/CsaV3_6G040870/CsaV3_2G032410/CsaV3_7G034770/CsaV3_6G004880/CsaV3_5G…	csv:101221637/csv:101215444/csv:101203793/csv:101207244/csv:101213384/csv:101217516/csv:101212096/csv:101208322/csv:101205224/csv:101220390/csv:101202739/csv:101203071/csv:101221637/csv:101208208/csv:101219802/csv:101211841/csv:101219465/csv:101217447/csv:101205015/csv:101210207/csv:101222665/csv:101203991/csv:101215925/csv:101212217/csv:101219248/csv:101219081/csv:101208774/csv:101211283/csv:101…	56	20	CsaV3_UNG224740/CsaV3_2G016650/CsaV3_6G036430/CsaV3_4G012120/CsaV3_1G039980/CsaV3_5G019990/CsaV3_3G018370/CsaV3_3G040620/CsaV3_6G040870/CsaV3_2G032410/CsaV3_6G004880/CsaV3_2G009040/CsaV3_7G008800/CsaV3_5G036280/CsaV3_3G038040/CsaV3_UNG111850/CsaV3_1G017330/CsaV3_6G038490/CsaV3_5G012480/CsaV3_4G004200	36	CsaV3_3G042650/CsaV3_3G036430/CsaV3_7G034290/CsaV3_1G041580/CsaV3_7G026750/CsaV3_6G040390/CsaV3_6G009310/CsaV3_1G001530/CsaV3_4G036490/CsaV3_4G008960/CsaV3_6G014010/CsaV3_2G012300/CsaV3_7G027140/CsaV3_4G030890/CsaV3_7G034770/CsaV3_5G034720/CsaV3_3G003970/CsaV3_1G001380/CsaV3_3G009030/CsaV3_1G015760/CsaV3_3G023460/CsaV3_4G012100/CsaV3_6G021850/CsaV3_3G032260/CsaV3_3G004220/CsaV3_1G026740/CsaV3_4G0…
csv00400	Phenylalanine, tyrosine and tryptophan biosynthesis	25/2412	41/4184	0.394914	0.940251	CsaV3_6G045310/CsaV3_7G006730/CsaV3_5G038370/CsaV3_5G015330/CsaV3_3G043270/CsaV3_6G036360/CsaV3_7G002440/CsaV3_2G017780/CsaV3_2G017660/CsaV3_4G031290/CsaV3_4G000360/CsaV3_6G048980/CsaV3_2G034880/CsaV3_6G042420/CsaV3_1G044710/CsaV3_3G000670/CsaV3_5G038950/CsaV3_2G032340/CsaV3_5G010220/CsaV3_6G015190/CsaV3_3G047470/CsaV3_1G013270/CsaV3_3G004760/CsaV3_3G009780/CsaV3_6G021500	CsaV3_6G045310/CsaV3_7G006730/CsaV3_5G038370/CsaV3_5G015330/CsaV3_3G043270/CsaV3_6G036360/CsaV3_7G002440/CsaV3_2G017780/CsaV3_2G017660/CsaV3_4G031290/CsaV3_4G000360/CsaV3_6G048980/CsaV3_2G034880/CsaV3_6G042420/CsaV3_1G044710/CsaV3_3G000670/CsaV3_5G038950/CsaV3_2G032340/CsaV3_5G010220/CsaV3_6G015190/CsaV3_3G047470/CsaV3_1G013270/CsaV3_3G004760/CsaV3_3G009780/CsaV3_6G021500	csv:101207177/csv:101221603/csv:101203315/csv:101210521/csv:101222321/csv:101205929/csv:101215121/csv:101213380/csv:101210546/csv:101203740/csv:101212914/csv:101209833/csv:101217625/csv:101204463/csv:101220286/csv:101218240/csv:101219640/csv:101213342/csv:101202863/csv:101221092/csv:101213892/csv:101217299/csv:101218330/csv:101215568/csv:101217934	25	16	CsaV3_7G006730/CsaV3_5G038370/CsaV3_5G015330/CsaV3_3G043270/CsaV3_7G002440/CsaV3_2G017780/CsaV3_4G031290/CsaV3_6G048980/CsaV3_2G034880/CsaV3_6G042420/CsaV3_5G038950/CsaV3_2G032340/CsaV3_5G010220/CsaV3_6G015190/CsaV3_3G047470/CsaV3_6G021500	9	CsaV3_6G045310/CsaV3_6G036360/CsaV3_2G017660/CsaV3_4G000360/CsaV3_1G044710/CsaV3_3G000670/CsaV3_1G013270/CsaV3_3G004760/CsaV3_3G009780
csv00220	Arginine biosynthesis	22/2412	36/4184	0.403498	0.940251	CsaV3_6G044190/CsaV3_1G000670/CsaV3_5G031200/CsaV3_4G013280/CsaV3_2G014210/CsaV3_5G031220/CsaV3_7G033940/CsaV3_2G030250/CsaV3_3G031010/CsaV3_2G024880/CsaV3_7G030560/CsaV3_7G032040/CsaV3_2G032340/CsaV3_3G047470/CsaV3_3G021030/CsaV3_5G005130/CsaV3_1G013270/CsaV3_6G006290/CsaV3_1G009560/CsaV3_3G044050/CsaV3_5G023920/CsaV3_5G005200	CsaV3_6G044190/CsaV3_1G000670/CsaV3_5G031200/CsaV3_4G013280/CsaV3_2G014210/CsaV3_5G031220/CsaV3_7G033940/CsaV3_2G030250/CsaV3_3G031010/CsaV3_2G024880/CsaV3_7G030560/CsaV3_7G032040/CsaV3_2G032340/CsaV3_3G047470/CsaV3_3G021030/CsaV3_5G005130/CsaV3_1G013270/CsaV3_6G006290/CsaV3_1G009560/CsaV3_3G044050/CsaV3_5G023920/CsaV3_5G005200	csv:101223180/csv:101215982/csv:101213570/csv:101221948/csv:101213242/csv:101220645/csv:101212146/csv:101213711/csv:101207254/csv:101207914/csv:101213413/csv:101211809/csv:101213342/csv:101213892/csv:101221473/csv:101218466/csv:101217299/csv:101207674/csv:101215247/csv:101207765/csv:101215515/csv:101215455	22	15	CsaV3_6G044190/CsaV3_1G000670/CsaV3_5G031200/CsaV3_5G031220/CsaV3_2G030250/CsaV3_3G031010/CsaV3_2G024880/CsaV3_7G030560/CsaV3_2G032340/CsaV3_3G047470/CsaV3_3G021030/CsaV3_5G005130/CsaV3_3G044050/CsaV3_5G023920/CsaV3_5G005200	7	CsaV3_4G013280/CsaV3_2G014210/CsaV3_7G033940/CsaV3_7G032040/CsaV3_1G013270/CsaV3_6G006290/CsaV3_1G009560
csv00760	Nicotinate and nicotinamide metabolism	187341	19/4184	0.404375	0.940251	CsaV3_3G034830/CsaV3_1G008930/CsaV3_2G016480/CsaV3_5G027390/CsaV3_3G004240/CsaV3_5G001970/CsaV3_3G013340/CsaV3_6G040600/CsaV3_5G013570/CsaV3_4G008190/CsaV3_3G043750/CsaV3_UNG236470	CsaV3_3G034830/CsaV3_1G008930/CsaV3_2G016480/CsaV3_5G027390/CsaV3_3G004240/CsaV3_5G001970/CsaV3_3G013340/CsaV3_6G040600/CsaV3_5G013570/CsaV3_4G008190/CsaV3_3G043750/CsaV3_UNG236470	csv:101205253/csv:101208114/csv:101210953/csv:101205815/csv:101222585/csv:101207747/csv:101206491/csv:101211263/csv:101208793/csv:101209512/csv:101203747/csv:101208793	12	11	CsaV3_1G008930/CsaV3_2G016480/CsaV3_5G027390/CsaV3_3G004240/CsaV3_5G001970/CsaV3_3G013340/CsaV3_6G040600/CsaV3_5G013570/CsaV3_4G008190/CsaV3_3G043750/CsaV3_UNG236470	1	CsaV3_3G034830
csv00564	Glycerophospholipid metabolism	54/2412	91/4184	0.413746	0.940251	CsaV3_1G029760/CsaV3_1G032150/CsaV3_4G001530/CsaV3_4G001340/CsaV3_7G032480/CsaV3_1G046370/CsaV3_6G005980/CsaV3_6G002870/CsaV3_2G028530/CsaV3_5G036950/CsaV3_5G028680/CsaV3_3G032910/CsaV3_7G023230/CsaV3_3G009390/CsaV3_3G039170/CsaV3_3G003480/CsaV3_2G006790/CsaV3_1G038830/CsaV3_1G000490/CsaV3_4G032370/CsaV3_6G002500/CsaV3_5G024850/CsaV3_1G008920/CsaV3_5G004310/CsaV3_1G043430/CsaV3_6G049130/CsaV3_2G0…	CsaV3_1G029760/CsaV3_1G032150/CsaV3_4G001530/CsaV3_4G001340/CsaV3_7G032480/CsaV3_1G046370/CsaV3_6G005980/CsaV3_6G002870/CsaV3_2G028530/CsaV3_5G036950/CsaV3_5G028680/CsaV3_3G032910/CsaV3_7G023230/CsaV3_3G009390/CsaV3_3G039170/CsaV3_3G003480/CsaV3_2G006790/CsaV3_1G038830/CsaV3_1G000490/CsaV3_4G032370/CsaV3_6G002500/CsaV3_5G024850/CsaV3_1G008920/CsaV3_5G004310/CsaV3_1G043430/CsaV3_6G049130/CsaV3_2G0…	csv:101211291/csv:101203184/csv:101215246/csv:101218579/csv:101206113/csv:101219898/csv:101218942/csv:101209183/csv:101218421/csv:101215524/csv:101205141/csv:101219788/csv:101216983/csv:101209255/csv:101206198/csv:101208016/csv:101220522/csv:101222774/csv:101212856/csv:101220769/csv:101212778/csv:101221307/csv:101207870/csv:101203358/csv:101218054/csv:101217556/csv:101213442/csv:101219872/csv:101…	54	31	CsaV3_1G029760/CsaV3_4G001530/CsaV3_4G001340/CsaV3_1G046370/CsaV3_6G002870/CsaV3_2G028530/CsaV3_5G036950/CsaV3_5G028680/CsaV3_3G032910/CsaV3_3G009390/CsaV3_2G006790/CsaV3_1G038830/CsaV3_4G032370/CsaV3_6G002500/CsaV3_1G008920/CsaV3_1G043430/CsaV3_3G034040/CsaV3_4G030910/CsaV3_7G024460/CsaV3_7G006180/CsaV3_6G036660/CsaV3_6G009150/CsaV3_1G029550/CsaV3_6G047530/CsaV3_1G006010/CsaV3_5G026900/CsaV3_2G0…	23	CsaV3_1G032150/CsaV3_7G032480/CsaV3_6G005980/CsaV3_7G023230/CsaV3_3G039170/CsaV3_3G003480/CsaV3_1G000490/CsaV3_5G024850/CsaV3_5G004310/CsaV3_6G049130/CsaV3_2G024470/CsaV3_1G007140/CsaV3_5G034740/CsaV3_4G024550/CsaV3_6G038020/CsaV3_1G018390/CsaV3_3G032790/CsaV3_1G032230/CsaV3_4G036540/CsaV3_1G042840/CsaV3_2G008470/CsaV3_2G016120/CsaV3_3G020620
csv00053	Ascorbate and aldarate metabolism	26/2412	43/4184	0.41575	0.940251	CsaV3_4G008770/CsaV3_7G007220/CsaV3_1G001600/CsaV3_2G004170/CsaV3_7G022020/CsaV3_3G037070/CsaV3_1G033510/CsaV3_2G032090/CsaV3_5G002470/CsaV3_5G027310/CsaV3_6G048460/CsaV3_3G020840/CsaV3_6G034310/CsaV3_4G024200/CsaV3_5G006680/CsaV3_7G034360/CsaV3_6G040510/CsaV3_3G005990/CsaV3_4G017670/CsaV3_7G000930/CsaV3_6G032490/CsaV3_1G042210/CsaV3_6G047320/CsaV3_4G005260/CsaV3_4G028150/CsaV3_6G033570	CsaV3_4G008770/CsaV3_7G007220/CsaV3_1G001600/CsaV3_2G004170/CsaV3_7G022020/CsaV3_3G037070/CsaV3_1G033510/CsaV3_2G032090/CsaV3_5G002470/CsaV3_5G027310/CsaV3_6G048460/CsaV3_3G020840/CsaV3_6G034310/CsaV3_4G024200/CsaV3_5G006680/CsaV3_7G034360/CsaV3_6G040510/CsaV3_3G005990/CsaV3_4G017670/CsaV3_7G000930/CsaV3_6G032490/CsaV3_1G042210/CsaV3_6G047320/CsaV3_4G005260/CsaV3_4G028150/CsaV3_6G033570	csv:101222306/csv:101206435/csv:101209430/csv:101222554/csv:101205337/csv:101207933/csv:101203032/csv:101216396/csv:101214011/csv:101203883/csv:101206261/csv:101203335/csv:101216755/csv:101205263/csv:101203666/csv:101205436/csv:101210277/csv:101206557/csv:101221649/csv:101206941/csv:101203157/csv:101215231/csv:101220337/csv:101221321/csv:101219329/csv:101203157	26	18	CsaV3_7G007220/CsaV3_1G001600/CsaV3_3G037070/CsaV3_2G032090/CsaV3_5G002470/CsaV3_5G027310/CsaV3_6G048460/CsaV3_3G020840/CsaV3_6G034310/CsaV3_4G024200/CsaV3_5G006680/CsaV3_7G034360/CsaV3_6G040510/CsaV3_4G017670/CsaV3_7G000930/CsaV3_1G042210/CsaV3_4G005260/CsaV3_4G028150	8	CsaV3_4G008770/CsaV3_2G004170/CsaV3_7G022020/CsaV3_1G033510/CsaV3_3G005990/CsaV3_6G032490/CsaV3_6G047320/CsaV3_6G033570
csv00380	Tryptophan metabolism	23/2412	38/4184	0.425702	0.940251	CsaV3_6G031490/CsaV3_1G039020/CsaV3_2G031080/CsaV3_6G000070/CsaV3_1G001600/CsaV3_7G000860/CsaV3_1G039030/CsaV3_4G024200/CsaV3_7G028260/CsaV3_7G034360/CsaV3_4G027340/CsaV3_3G017920/CsaV3_2G015800/CsaV3_7G021930/CsaV3_3G015370/CsaV3_2G015820/CsaV3_4G005260/CsaV3_1G015480/CsaV3_4G028150/CsaV3_3G028450/CsaV3_7G032910/CsaV3_7G032920/CsaV3_4G017460	CsaV3_6G031490/CsaV3_1G039020/CsaV3_2G031080/CsaV3_6G000070/CsaV3_1G001600/CsaV3_7G000860/CsaV3_1G039030/CsaV3_4G024200/CsaV3_7G028260/CsaV3_7G034360/CsaV3_4G027340/CsaV3_3G017920/CsaV3_2G015800/CsaV3_7G021930/CsaV3_3G015370/CsaV3_2G015820/CsaV3_4G005260/CsaV3_1G015480/CsaV3_4G028150/CsaV3_3G028450/CsaV3_7G032910/CsaV3_7G032920/CsaV3_4G017460	csv:101216662/csv:101209171/csv:101203913/csv:101207718/csv:101209430/csv:101204792/csv:101209418/csv:101205263/csv:101222503/csv:101205436/csv:101204410/csv:105434854/csv:101214819/csv:101204042/csv:101222823/csv:101215057/csv:101221321/csv:101212707/csv:101219329/csv:101205061/csv:101221824/csv:101221824/csv:101222350	23	20	CsaV3_6G031490/CsaV3_1G039020/CsaV3_2G031080/CsaV3_6G000070/CsaV3_1G001600/CsaV3_1G039030/CsaV3_4G024200/CsaV3_7G028260/CsaV3_7G034360/CsaV3_4G027340/CsaV3_3G017920/CsaV3_2G015800/CsaV3_3G015370/CsaV3_2G015820/CsaV3_4G005260/CsaV3_1G015480/CsaV3_4G028150/CsaV3_3G028450/CsaV3_7G032920/CsaV3_4G017460	3	CsaV3_7G000860/CsaV3_7G021930/CsaV3_7G032910
csv00500	Starch and sucrose metabolism	70/2412	119/4184	0.434623	0.940251	CsaV3_1G041400/CsaV3_2G011150/CsaV3_1G012560/CsaV3_1G046750/CsaV3_6G006740/CsaV3_3G016150/CsaV3_4G033920/CsaV3_4G007080/CsaV3_3G011520/CsaV3_2G010460/CsaV3_7G021990/CsaV3_3G043060/CsaV3_3G002150/CsaV3_2G001890/CsaV3_3G045370/CsaV3_3G006840/CsaV3_4G000970/CsaV3_1G007040/CsaV3_1G027950/CsaV3_1G010740/CsaV3_3G021110/CsaV3_3G038290/CsaV3_6G031530/CsaV3_5G024150/CsaV3_1G043010/CsaV3_6G044550/CsaV3_5G0…	CsaV3_1G041400/CsaV3_2G011150/CsaV3_1G012560/CsaV3_1G046750/CsaV3_6G006740/CsaV3_3G016150/CsaV3_4G033920/CsaV3_4G007080/CsaV3_3G011520/CsaV3_2G010460/CsaV3_7G021990/CsaV3_3G043060/CsaV3_3G002150/CsaV3_2G001890/CsaV3_3G045370/CsaV3_3G006840/CsaV3_4G000970/CsaV3_1G007040/CsaV3_1G027950/CsaV3_1G010740/CsaV3_3G021110/CsaV3_3G038290/CsaV3_6G031530/CsaV3_5G024150/CsaV3_1G043010/CsaV3_6G044550/CsaV3_5G0…	csv:101213767/csv:101208942/csv:101213300/csv:101216685/csv:101213366/csv:101212172/csv:101220587/csv:101212987/csv:101221739/csv:101220742/csv:101205661/csv:101223112/csv:101213455/csv:101218300/csv:101221562/csv:101213564/csv:101203847/csv:101218046/csv:101221022/csv:101213925/csv:101220298/csv:101212615/csv:101215687/csv:101213512/csv:101215511/csv:101219491/csv:101212873/csv:101205766/csv:101…	70	42	CsaV3_1G041400/CsaV3_2G011150/CsaV3_1G012560/CsaV3_4G033920/CsaV3_4G007080/CsaV3_2G010460/CsaV3_3G002150/CsaV3_2G001890/CsaV3_3G045370/CsaV3_4G000970/CsaV3_1G027950/CsaV3_1G010740/CsaV3_3G021110/CsaV3_3G038290/CsaV3_6G031530/CsaV3_1G043010/CsaV3_1G032200/CsaV3_5G001560/CsaV3_7G002310/CsaV3_3G047730/CsaV3_5G028300/CsaV3_1G010960/CsaV3_3G041330/CsaV3_5G032400/CsaV3_2G001860/CsaV3_1G005170/CsaV3_6G0…	28	CsaV3_1G046750/CsaV3_6G006740/CsaV3_3G016150/CsaV3_3G011520/CsaV3_7G021990/CsaV3_3G043060/CsaV3_3G006840/CsaV3_1G007040/CsaV3_5G024150/CsaV3_6G044550/CsaV3_5G037090/CsaV3_1G032980/CsaV3_7G005770/CsaV3_6G039140/CsaV3_2G015230/CsaV3_3G001510/CsaV3_1G043670/CsaV3_4G029230/CsaV3_1G032890/CsaV3_1G022900/CsaV3_6G051510/CsaV3_2G024360/CsaV3_5G020420/CsaV3_1G010680/CsaV3_3G013570/CsaV3_4G023300/CsaV3_3G0…
csv00511	Other glycan degradation	187280	16/4184	0.449738	0.940251	CsaV3_5G001420/CsaV3_5G006710/CsaV3_3G032600/CsaV3_5G039980/CsaV3_3G018140/CsaV3_5G010500/CsaV3_2G009420/CsaV3_6G047280/CsaV3_2G011410/CsaV3_4G004140	CsaV3_5G001420/CsaV3_5G006710/CsaV3_3G032600/CsaV3_5G039980/CsaV3_3G018140/CsaV3_5G010500/CsaV3_2G009420/CsaV3_6G047280/CsaV3_2G011410/CsaV3_4G004140	csv:101211186/csv:101202942/csv:101211123/csv:101204709/csv:101204534/csv:101203831/csv:101211792/csv:101221354/csv:101213022/csv:101205920	10	4	CsaV3_5G006710/CsaV3_2G009420/CsaV3_2G011410/CsaV3_4G004140	6	CsaV3_5G001420/CsaV3_3G032600/CsaV3_5G039980/CsaV3_3G018140/CsaV3_5G010500/CsaV3_6G047280
csv00941	Flavonoid biosynthesis	187280	16/4184	0.449738	0.940251	CsaV3_6G009030/CsaV3_3G000790/CsaV3_2G009070/CsaV3_6G013150/CsaV3_7G008590/CsaV3_1G026620/CsaV3_3G039990/CsaV3_5G010920/CsaV3_5G030330/CsaV3_3G027830	CsaV3_6G009030/CsaV3_3G000790/CsaV3_2G009070/CsaV3_6G013150/CsaV3_7G008590/CsaV3_1G026620/CsaV3_3G039990/CsaV3_5G010920/CsaV3_5G030330/CsaV3_3G027830	csv:101206443/csv:101215613/csv:101205537/csv:101221846/csv:101205648/csv:101208511/csv:101217257/csv:101218716/csv:101212121/csv:101205211	10	5	CsaV3_6G009030/CsaV3_3G000790/CsaV3_1G026620/CsaV3_5G010920/CsaV3_3G027830	5	CsaV3_2G009070/CsaV3_6G013150/CsaV3_7G008590/CsaV3_3G039990/CsaV3_5G030330
csv00950	Isoquinoline alkaloid biosynthesis	187280	16/4184	0.449738	0.940251	CsaV3_5G003790/CsaV3_5G003800/CsaV3_4G000360/CsaV3_6G038140/CsaV3_2G032340/CsaV3_6G015190/CsaV3_3G047470/CsaV3_1G013270/CsaV3_6G038150/CsaV3_3G028450	CsaV3_5G003790/CsaV3_5G003800/CsaV3_4G000360/CsaV3_6G038140/CsaV3_2G032340/CsaV3_6G015190/CsaV3_3G047470/CsaV3_1G013270/CsaV3_6G038150/CsaV3_3G028450	csv:101213059/csv:101212818/csv:101212914/csv:101222232/csv:101213342/csv:101221092/csv:101213892/csv:101217299/csv:101222468/csv:101205061	10	7	CsaV3_5G003790/CsaV3_5G003800/CsaV3_2G032340/CsaV3_6G015190/CsaV3_3G047470/CsaV3_6G038150/CsaV3_3G028450	3	CsaV3_4G000360/CsaV3_6G038140/CsaV3_1G013270
csv04120	Ubiquitin mediated proteolysis	57/2412	97/4184	0.453928	0.940251	CsaV3_5G032430/CsaV3_4G030530/CsaV3_7G023260/CsaV3_5G003380/CsaV3_5G002220/CsaV3_5G036070/CsaV3_5G036660/CsaV3_5G010260/CsaV3_1G045940/CsaV3_3G008830/CsaV3_5G000720/CsaV3_4G023570/CsaV3_2G024370/CsaV3_5G002660/CsaV3_6G031140/CsaV3_3G032410/novel.877/CsaV3_3G011750/CsaV3_3G019900/CsaV3_3G046770/CsaV3_7G028740/CsaV3_2G035660/CsaV3_6G040090/CsaV3_1G000230/CsaV3_3G010030/CsaV3_3G042790/CsaV3_3G014220…	CsaV3_5G032430/CsaV3_4G030530/CsaV3_7G023260/CsaV3_5G003380/CsaV3_5G002220/CsaV3_5G036070/CsaV3_5G036660/CsaV3_5G010260/CsaV3_1G045940/CsaV3_3G008830/CsaV3_5G000720/CsaV3_4G023570/CsaV3_2G024370/CsaV3_5G002660/CsaV3_6G031140/CsaV3_3G032410/-/CsaV3_3G011750/CsaV3_3G019900/CsaV3_3G046770/CsaV3_7G028740/CsaV3_2G035660/CsaV3_6G040090/CsaV3_1G000230/CsaV3_3G010030/CsaV3_3G042790/CsaV3_3G014220/CsaV3_3…	csv:101223010/csv:101217217/csv:101214340/csv:101220762/csv:101210687/csv:101209121/csv:101205198/csv:101222904/csv:101203654/csv:101221190/csv:101220694/csv:101205198/csv:101217906/csv:101216007/csv:101220292/csv:101208421/csv:101218340/csv:101204424/csv:105434867/csv:101203062/csv:101215815/csv:101208997/csv:101203488/csv:101209270/csv:101220010/csv:101218217/csv:101219616/csv:101204424/csv:101…	57	37	CsaV3_5G032430/CsaV3_4G030530/CsaV3_7G023260/CsaV3_5G002220/CsaV3_5G010260/CsaV3_3G008830/CsaV3_5G000720/CsaV3_4G023570/CsaV3_2G024370/CsaV3_5G002660/CsaV3_6G031140/CsaV3_3G032410/novel.877/CsaV3_3G011750/CsaV3_3G019900/CsaV3_3G046770/CsaV3_7G028740/CsaV3_2G035660/CsaV3_6G040090/CsaV3_1G000230/CsaV3_3G042790/CsaV3_3G014220/CsaV3_3G011740/CsaV3_4G033720/CsaV3_5G032450/CsaV3_6G007200/CsaV3_3G035510…	20	CsaV3_5G003380/CsaV3_5G036070/CsaV3_5G036660/CsaV3_1G045940/CsaV3_3G010030/CsaV3_6G015970/CsaV3_1G045710/CsaV3_3G041070/CsaV3_1G008320/CsaV3_3G036630/CsaV3_5G024810/CsaV3_6G016240/CsaV3_2G015050/CsaV3_5G025240/CsaV3_6G000010/novel.793/CsaV3_2G004570/CsaV3_3G015120/CsaV3_1G041100/CsaV3_4G007910
csv00030	Pentose phosphate pathway	28/2412	47/4184	0.455112	0.940251	CsaV3_2G015280/CsaV3_5G003980/CsaV3_3G009790/CsaV3_1G046070/CsaV3_7G021470/CsaV3_4G025890/CsaV3_1G039980/CsaV3_4G037690/CsaV3_6G006270/CsaV3_4G025880/CsaV3_4G008960/CsaV3_4G002210/CsaV3_2G003650/CsaV3_1G005660/CsaV3_5G028300/CsaV3_3G002000/CsaV3_5G034910/CsaV3_5G028690/CsaV3_4G029990/CsaV3_3G023460/CsaV3_5G000230/CsaV3_5G005570/CsaV3_1G016980/CsaV3_1G037750/CsaV3_1G016970/CsaV3_5G005340/CsaV3_4G0…	CsaV3_2G015280/CsaV3_5G003980/CsaV3_3G009790/CsaV3_1G046070/CsaV3_7G021470/CsaV3_4G025890/CsaV3_1G039980/CsaV3_4G037690/CsaV3_6G006270/CsaV3_4G025880/CsaV3_4G008960/CsaV3_4G002210/CsaV3_2G003650/CsaV3_1G005660/CsaV3_5G028300/CsaV3_3G002000/CsaV3_5G034910/CsaV3_5G028690/CsaV3_4G029990/CsaV3_3G023460/CsaV3_5G000230/CsaV3_5G005570/CsaV3_1G016980/CsaV3_1G037750/CsaV3_1G016970/CsaV3_5G005340/CsaV3_4G0…	csv:101204323/csv:101215470/csv:101215805/csv:101215219/csv:101219476/csv:101211447/csv:101202739/csv:101208728/csv:101206943/csv:101211927/csv:101219465/csv:101205302/csv:101208699/csv:101219871/csv:101218883/csv:101216517/csv:101211316/csv:101218080/csv:101203574/csv:101220704/csv:101206872/csv:101209451/csv:101223065/csv:101214374/csv:101223065/csv:101216892/csv:101204973/csv:101211230	28	19	CsaV3_2G015280/CsaV3_5G003980/CsaV3_3G009790/CsaV3_1G046070/CsaV3_7G021470/CsaV3_4G025890/CsaV3_1G039980/CsaV3_6G006270/CsaV3_4G025880/CsaV3_4G002210/CsaV3_1G005660/CsaV3_5G028300/CsaV3_3G002000/CsaV3_5G028690/CsaV3_5G000230/CsaV3_5G005570/CsaV3_1G037750/CsaV3_5G005340/CsaV3_4G004200	9	CsaV3_4G037690/CsaV3_4G008960/CsaV3_2G003650/CsaV3_5G034910/CsaV3_4G029990/CsaV3_3G023460/CsaV3_1G016980/CsaV3_1G016970/CsaV3_6G048090
csv00240	Pyrimidine metabolism	28/2412	47/4184	0.455112	0.940251	CsaV3_5G029640/CsaV3_6G009390/CsaV3_3G011970/CsaV3_2G028630/CsaV3_1G002650/CsaV3_6G006570/CsaV3_3G010330/CsaV3_4G025430/CsaV3_7G006870/CsaV3_6G042080/CsaV3_1G007330/CsaV3_3G013340/CsaV3_5G020740/CsaV3_7G026770/CsaV3_3G027630/CsaV3_1G040320/CsaV3_1G043140/CsaV3_3G016240/CsaV3_3G041260/CsaV3_6G040600/CsaV3_3G043750/CsaV3_5G035170/CsaV3_6G041780/CsaV3_7G023220/CsaV3_6G038890/CsaV3_4G001780/CsaV3_6G0…	CsaV3_5G029640/CsaV3_6G009390/CsaV3_3G011970/CsaV3_2G028630/CsaV3_1G002650/CsaV3_6G006570/CsaV3_3G010330/CsaV3_4G025430/CsaV3_7G006870/CsaV3_6G042080/CsaV3_1G007330/CsaV3_3G013340/CsaV3_5G020740/CsaV3_7G026770/CsaV3_3G027630/CsaV3_1G040320/CsaV3_1G043140/CsaV3_3G016240/CsaV3_3G041260/CsaV3_6G040600/CsaV3_3G043750/CsaV3_5G035170/CsaV3_6G041780/CsaV3_7G023220/CsaV3_6G038890/CsaV3_4G001780/CsaV3_6G0…	csv:101222857/csv:101217271/csv:101207880/csv:101218654/csv:101204836/csv:101223081/csv:101204669/csv:101209447/csv:101223016/csv:101210105/csv:101202899/csv:101206491/csv:101214106/csv:105436154/csv:101222416/csv:101209098/csv:101217190/csv:101217681/csv:101214458/csv:101211263/csv:101203747/csv:101208126/csv:101221565/csv:101213614/csv:101204944/csv:101212270/csv:101219296/csv:101210506	28	16	CsaV3_5G029640/CsaV3_3G011970/CsaV3_1G002650/CsaV3_6G006570/CsaV3_4G025430/CsaV3_7G006870/CsaV3_1G007330/CsaV3_3G013340/CsaV3_5G020740/CsaV3_1G040320/CsaV3_1G043140/CsaV3_3G041260/CsaV3_6G040600/CsaV3_3G043750/CsaV3_4G001780/CsaV3_6G053210	12	CsaV3_6G009390/CsaV3_2G028630/CsaV3_3G010330/CsaV3_6G042080/CsaV3_7G026770/CsaV3_3G027630/CsaV3_3G016240/CsaV3_5G035170/CsaV3_6G041780/CsaV3_7G023220/CsaV3_6G038890/CsaV3_1G003160
csv00630	Glyoxylate and dicarboxylate metabolism	39/2412	66/4184	0.457299	0.940251	CsaV3_6G031490/CsaV3_6G028390/CsaV3_5G034360/CsaV3_2G011710/CsaV3_6G039090/CsaV3_1G043170/CsaV3_6G000070/CsaV3_5G004640/CsaV3_5G031200/CsaV3_6G044520/CsaV3_6G051820/CsaV3_6G048160/CsaV3_5G031220/CsaV3_7G001060/CsaV3_2G012760/CsaV3_7G028870/CsaV3_3G007460/CsaV3_4G008360/CsaV3_3G040230/CsaV3_1G002350/CsaV3_3G030870/CsaV3_2G024880/CsaV3_7G030560/CsaV3_2G025570/CsaV3_3G020130/CsaV3_4G007440/CsaV3_1G0…	CsaV3_6G031490/CsaV3_6G028390/CsaV3_5G034360/CsaV3_2G011710/CsaV3_6G039090/CsaV3_1G043170/CsaV3_6G000070/CsaV3_5G004640/CsaV3_5G031200/CsaV3_6G044520/CsaV3_6G051820/CsaV3_6G048160/CsaV3_5G031220/CsaV3_7G001060/CsaV3_2G012760/CsaV3_7G028870/CsaV3_3G007460/CsaV3_4G008360/CsaV3_3G040230/CsaV3_1G002350/CsaV3_3G030870/CsaV3_2G024880/CsaV3_7G030560/CsaV3_2G025570/CsaV3_3G020130/CsaV3_4G007440/CsaV3_1G0…	csv:101216662/csv:101214377/csv:101219300/csv:101215910/csv:101207975/csv:101217893/csv:101207718/csv:101220634/csv:101213570/csv:101219252/csv:101215498/csv:101210494/csv:101220645/csv:101209132/csv:101204387/csv:101214377/csv:101221189/csv:101207078/csv:101214380/csv:101213903/csv:101205684/csv:101207914/csv:101213413/csv:101217746/csv:101203579/csv:101212892/csv:101209186/csv:101213516/csv:101…	39	29	CsaV3_6G031490/CsaV3_5G034360/CsaV3_6G039090/CsaV3_1G043170/CsaV3_6G000070/CsaV3_5G004640/CsaV3_5G031200/CsaV3_6G044520/CsaV3_6G051820/CsaV3_6G048160/CsaV3_5G031220/CsaV3_7G001060/CsaV3_3G007460/CsaV3_3G040230/CsaV3_3G030870/CsaV3_2G024880/CsaV3_7G030560/CsaV3_2G025570/CsaV3_3G020130/CsaV3_4G007440/CsaV3_3G042420/CsaV3_3G015370/CsaV3_7G032960/CsaV3_3G021030/CsaV3_6G043980/CsaV3_1G015480/CsaV3_2G0…	10	CsaV3_6G028390/CsaV3_2G011710/CsaV3_2G012760/CsaV3_7G028870/CsaV3_4G008360/CsaV3_1G002350/CsaV3_1G044450/CsaV3_4G028640/CsaV3_5G002930/CsaV3_7G003590
csv04075	Plant hormone signal transduction	124/2412	213/4184	0.461085	0.940251	CsaV3_7G025380/CsaV3_5G024480/CsaV3_2G004120/CsaV3_2G004130/CsaV3_7G025250/CsaV3_7G027600/CsaV3_6G009450/CsaV3_2G030510/CsaV3_3G002220/CsaV3_3G012390/CsaV3_2G026460/CsaV3_4G034230/CsaV3_7G006290/CsaV3_3G007730/CsaV3_4G030060/CsaV3_1G031420/CsaV3_3G012170/CsaV3_6G007840/novel.1028/CsaV3_7G034270/CsaV3_6G003360/CsaV3_2G025170/CsaV3_1G041950/CsaV3_5G037080/CsaV3_6G045260/CsaV3_1G031470/CsaV3_4G03005…	CsaV3_7G025380/CsaV3_5G024480/CsaV3_2G004120/CsaV3_2G004130/CsaV3_7G025250/CsaV3_7G027600/CsaV3_6G009450/CsaV3_2G030510/CsaV3_3G002220/CsaV3_3G012390/CsaV3_2G026460/CsaV3_4G034230/CsaV3_7G006290/CsaV3_3G007730/CsaV3_4G030060/CsaV3_1G031420/CsaV3_3G012170/CsaV3_6G007840/-/CsaV3_7G034270/CsaV3_6G003360/CsaV3_2G025170/CsaV3_1G041950/CsaV3_5G037080/CsaV3_6G045260/CsaV3_1G031470/CsaV3_4G030050/CsaV3_4…	csv:101205805/csv:101210839/csv:101216767/csv:101223028/csv:101210262/csv:101218948/csv:101221294/csv:101221088/csv:101207431/csv:101213967/csv:101205442/csv:105435299/csv:101216389/csv:101204264/csv:101209540/csv:101217216/csv:101210326/csv:101204703/csv:101204531/csv:101207496/csv:101210308/csv:101204370/csv:101222720/csv:101213109/csv:101206218/csv:101209219/csv:101204472/csv:101216389/csv:101…	124	79	CsaV3_7G025380/CsaV3_2G004120/CsaV3_2G004130/CsaV3_7G025250/CsaV3_7G027600/CsaV3_6G009450/CsaV3_2G030510/CsaV3_3G002220/CsaV3_3G012390/CsaV3_2G026460/CsaV3_4G034230/CsaV3_7G006290/CsaV3_3G007730/CsaV3_4G030060/novel.1028/CsaV3_7G034270/CsaV3_6G003360/CsaV3_2G025170/CsaV3_1G041950/CsaV3_6G045260/CsaV3_1G031470/CsaV3_4G030050/CsaV3_6G008270/CsaV3_6G014980/CsaV3_4G034760/CsaV3_3G014010/CsaV3_2G01538…	45	CsaV3_5G024480/CsaV3_1G031420/CsaV3_3G012170/CsaV3_6G007840/CsaV3_5G037080/CsaV3_4G009310/CsaV3_7G027610/CsaV3_4G035560/CsaV3_6G001340/CsaV3_2G012400/CsaV3_1G031460/CsaV3_3G010190/CsaV3_3G040450/CsaV3_5G011030/CsaV3_3G045690/CsaV3_7G000560/CsaV3_5G004700/CsaV3_7G008500/CsaV3_6G007970/CsaV3_2G009260/CsaV3_5G031940/CsaV3_4G007550/CsaV3_7G028700/CsaV3_1G014770/CsaV3_6G015280/CsaV3_2G013230/CsaV3_7G0…
csv00945	Stilbenoid, diarylheptanoid and gingerol biosynthesis	187188	834521	0.468056	0.940251	CsaV3_2G009070/CsaV3_6G013150/CsaV3_7G008590/CsaV3_1G026620/CsaV3_3G039990/CsaV3_5G030330/CsaV3_7G003200	CsaV3_2G009070/CsaV3_6G013150/CsaV3_7G008590/CsaV3_1G026620/CsaV3_3G039990/CsaV3_5G030330/CsaV3_7G003200	csv:101205537/csv:101221846/csv:101205648/csv:101208511/csv:101217257/csv:101212121/csv:101216522	7	2	CsaV3_1G026620/CsaV3_7G003200	5	CsaV3_2G009070/CsaV3_6G013150/CsaV3_7G008590/CsaV3_3G039990/CsaV3_5G030330
csv04136	Autophagy - other	18/2412	30/4184	0.473453	0.940251	CsaV3_5G004160/CsaV3_6G009210/CsaV3_7G030480/CsaV3_6G049010/CsaV3_3G043520/CsaV3_5G037660/CsaV3_7G007670/CsaV3_6G008640/CsaV3_3G022520/CsaV3_4G004080/CsaV3_4G026950/CsaV3_2G034910/CsaV3_4G023390/CsaV3_6G036040/CsaV3_2G024650/CsaV3_1G039890/CsaV3_6G041860/CsaV3_1G000860	CsaV3_5G004160/CsaV3_6G009210/CsaV3_7G030480/CsaV3_6G049010/CsaV3_3G043520/CsaV3_5G037660/CsaV3_7G007670/CsaV3_6G008640/CsaV3_3G022520/CsaV3_4G004080/CsaV3_4G026950/CsaV3_2G034910/CsaV3_4G023390/CsaV3_6G036040/CsaV3_2G024650/CsaV3_1G039890/CsaV3_6G041860/CsaV3_1G000860	csv:101205863/csv:101204045/csv:101213890/csv:101219454/csv:101214589/csv:101208902/csv:101212051/csv:101210427/csv:101215716/csv:101207356/csv:101210550/csv:101217161/csv:101216235/csv:101210127/csv:101210847/csv:101221823/csv:101221089/csv:101219308	18	13	CsaV3_5G004160/CsaV3_6G009210/CsaV3_7G030480/CsaV3_6G049010/CsaV3_3G043520/CsaV3_7G007670/CsaV3_6G008640/CsaV3_3G022520/CsaV3_2G034910/CsaV3_2G024650/CsaV3_1G039890/CsaV3_6G041860/CsaV3_1G000860	5	CsaV3_5G037660/CsaV3_4G004080/CsaV3_4G026950/CsaV3_4G023390/CsaV3_6G036040
csv00592	alpha-Linolenic acid metabolism	37/2412	63/4184	0.483959	0.940251	CsaV3_1G032150/CsaV3_7G010160/CsaV3_3G042140/CsaV3_3G028760/CsaV3_3G042130/CsaV3_1G046370/CsaV3_5G030460/CsaV3_5G039150/CsaV3_6G023960/CsaV3_2G033050/CsaV3_5G035840/CsaV3_1G004200/CsaV3_6G025310/CsaV3_7G010170/CsaV3_2G028330/CsaV3_7G024950/CsaV3_3G033630/CsaV3_3G045390/CsaV3_7G024990/CsaV3_3G000680/CsaV3_7G026290/CsaV3_6G025240/CsaV3_6G022310/CsaV3_4G023930/CsaV3_4G023830/CsaV3_2G002170/CsaV3_2G0…	CsaV3_1G032150/CsaV3_7G010160/CsaV3_3G042140/CsaV3_3G028760/CsaV3_3G042130/CsaV3_1G046370/CsaV3_5G030460/CsaV3_5G039150/CsaV3_6G023960/CsaV3_2G033050/CsaV3_5G035840/CsaV3_1G004200/CsaV3_6G025310/CsaV3_7G010170/CsaV3_2G028330/CsaV3_7G024950/CsaV3_3G033630/CsaV3_3G045390/CsaV3_7G024990/CsaV3_3G000680/CsaV3_7G026290/CsaV3_6G025240/CsaV3_6G022310/CsaV3_4G023930/CsaV3_4G023830/CsaV3_2G002170/CsaV3_2G0…	csv:101203184/csv:101211324/csv:101218397/csv:101208182/csv:101206631/csv:101219898/csv:101209343/csv:101213826/csv:101218899/csv:101203714/csv:101206690/csv:101218599/csv:101218899/csv:101211574/csv:101221732/csv:101209854/csv:101209181/csv:101220850/csv:101206036/csv:101211109/csv:101209067/csv:101218899/csv:101210295/csv:101209041/csv:101216079/csv:101209359/csv:101212301/csv:101220632/csv:101…	37	29	CsaV3_7G010160/CsaV3_1G046370/CsaV3_5G030460/CsaV3_5G039150/CsaV3_6G023960/CsaV3_5G035840/CsaV3_1G004200/CsaV3_6G025310/CsaV3_7G010170/CsaV3_2G028330/CsaV3_7G024950/CsaV3_3G033630/CsaV3_3G045390/CsaV3_7G024990/CsaV3_3G000680/CsaV3_7G026290/CsaV3_6G025240/CsaV3_6G022310/CsaV3_4G023930/CsaV3_2G002170/CsaV3_2G011380/CsaV3_2G034560/CsaV3_3G011240/CsaV3_7G006690/CsaV3_6G023910/CsaV3_6G024110/CsaV3_5G0…	8	CsaV3_1G032150/CsaV3_3G042140/CsaV3_3G028760/CsaV3_3G042130/CsaV3_2G033050/CsaV3_4G023830/CsaV3_4G037360/CsaV3_4G037110
csv00410	beta-Alanine metabolism	26/2412	44/4184	0.486621	0.940251	CsaV3_4G032140/CsaV3_1G043650/CsaV3_5G003790/CsaV3_5G003800/CsaV3_1G001600/CsaV3_1G005000/CsaV3_4G007490/CsaV3_5G020650/CsaV3_6G038140/CsaV3_1G037300/CsaV3_2G001470/CsaV3_4G024200/CsaV3_7G006870/CsaV3_3G033630/CsaV3_3G010140/CsaV3_7G034360/CsaV3_1G007330/CsaV3_2G002430/CsaV3_7G007110/CsaV3_2G034560/CsaV3_1G046130/CsaV3_4G005260/CsaV3_6G038150/CsaV3_4G028150/CsaV3_6G038890/CsaV3_7G030830	CsaV3_4G032140/CsaV3_1G043650/CsaV3_5G003790/CsaV3_5G003800/CsaV3_1G001600/CsaV3_1G005000/CsaV3_4G007490/CsaV3_5G020650/CsaV3_6G038140/CsaV3_1G037300/CsaV3_2G001470/CsaV3_4G024200/CsaV3_7G006870/CsaV3_3G033630/CsaV3_3G010140/CsaV3_7G034360/CsaV3_1G007330/CsaV3_2G002430/CsaV3_7G007110/CsaV3_2G034560/CsaV3_1G046130/CsaV3_4G005260/CsaV3_6G038150/CsaV3_4G028150/CsaV3_6G038890/CsaV3_7G030830	csv:101205765/csv:101222552/csv:101213059/csv:101212818/csv:101209430/csv:101210903/csv:101213852/csv:101216119/csv:101222232/csv:101210819/csv:101205432/csv:101205263/csv:101223016/csv:101209181/csv:101221427/csv:101205436/csv:101202899/csv:101207231/csv:101204924/csv:101220632/csv:101205111/csv:101221321/csv:101222468/csv:101219329/csv:101204944/csv:101209263	26	22	CsaV3_1G043650/CsaV3_5G003790/CsaV3_5G003800/CsaV3_1G001600/CsaV3_1G005000/CsaV3_4G007490/CsaV3_1G037300/CsaV3_2G001470/CsaV3_4G024200/CsaV3_7G006870/CsaV3_3G033630/CsaV3_3G010140/CsaV3_7G034360/CsaV3_1G007330/CsaV3_2G002430/CsaV3_7G007110/CsaV3_2G034560/CsaV3_1G046130/CsaV3_4G005260/CsaV3_6G038150/CsaV3_4G028150/CsaV3_7G030830	4	CsaV3_4G032140/CsaV3_5G020650/CsaV3_6G038140/CsaV3_6G038890
csv00230	Purine metabolism	49/2412	84/4184	0.495475	0.941402	CsaV3_3G000810/CsaV3_3G027210/CsaV3_2G032170/CsaV3_4G024410/CsaV3_4G011640/CsaV3_6G036560/CsaV3_6G044100/CsaV3_6G040330/CsaV3_5G010490/CsaV3_1G012190/CsaV3_2G033180/CsaV3_3G035840/CsaV3_3G021780/CsaV3_3G004750/CsaV3_6G042080/CsaV3_4G000040/CsaV3_1G042760/CsaV3_1G010130/CsaV3_3G013340/CsaV3_1G010170/CsaV3_3G002990/CsaV3_1G008920/CsaV3_2G013320/CsaV3_5G035210/CsaV3_3G010120/CsaV3_5G006390/CsaV3_5G0…	CsaV3_3G000810/CsaV3_3G027210/CsaV3_2G032170/CsaV3_4G024410/CsaV3_4G011640/CsaV3_6G036560/CsaV3_6G044100/CsaV3_6G040330/CsaV3_5G010490/CsaV3_1G012190/CsaV3_2G033180/CsaV3_3G035840/CsaV3_3G021780/CsaV3_3G004750/CsaV3_6G042080/CsaV3_4G000040/CsaV3_1G042760/CsaV3_1G010130/CsaV3_3G013340/CsaV3_1G010170/CsaV3_3G002990/CsaV3_1G008920/CsaV3_2G013320/CsaV3_5G035210/CsaV3_3G010120/CsaV3_5G006390/CsaV3_5G0…	csv:101215130/csv:101217918/csv:101215432/csv:101221997/csv:101212263/csv:101203595/csv:101204217/csv:101206620/csv:101204076/csv:101208006/csv:101220975/csv:101218678/csv:101206887/csv:101218090/csv:101210105/csv:101220786/csv:101211977/csv:101218785/csv:101206491/csv:101206006/csv:101218731/csv:101207870/csv:101218017/csv:101206975/csv:101221191/csv:101221935/csv:101218883/csv:101216517/csv:101…	49	24	CsaV3_3G000810/CsaV3_2G032170/CsaV3_5G010490/CsaV3_1G012190/CsaV3_2G033180/CsaV3_3G004750/CsaV3_1G042760/CsaV3_1G010130/CsaV3_3G013340/CsaV3_1G010170/CsaV3_1G008920/CsaV3_2G013320/CsaV3_5G035210/CsaV3_3G010120/CsaV3_5G006390/CsaV3_5G028300/CsaV3_3G002000/CsaV3_6G053020/CsaV3_3G012550/CsaV3_7G008570/CsaV3_5G005570/CsaV3_3G043750/CsaV3_2G030020/CsaV3_7G023050	25	CsaV3_3G027210/CsaV3_4G024410/CsaV3_4G011640/CsaV3_6G036560/CsaV3_6G044100/CsaV3_6G040330/CsaV3_3G035840/CsaV3_3G021780/CsaV3_6G042080/CsaV3_4G000040/CsaV3_3G002990/CsaV3_3G027630/CsaV3_7G034450/CsaV3_2G026200/CsaV3_2G015340/CsaV3_3G015600/CsaV3_5G002770/CsaV3_5G029170/CsaV3_1G016980/CsaV3_1G000690/CsaV3_5G035170/CsaV3_4G017590/CsaV3_4G031360/CsaV3_1G016970/CsaV3_1G016950
csv00100	Steroid biosynthesis	16/2412	27/4184	0.514083	0.94525	CsaV3_3G003250/CsaV3_4G028790/CsaV3_6G031840/CsaV3_1G009570/CsaV3_6G051670/CsaV3_7G030530/CsaV3_4G009240/CsaV3_3G027160/CsaV3_2G015210/CsaV3_3G032010/CsaV3_4G002070/CsaV3_7G033590/CsaV3_1G035670/CsaV3_7G033720/CsaV3_4G035350/CsaV3_3G046140	CsaV3_3G003250/CsaV3_4G028790/CsaV3_6G031840/CsaV3_1G009570/CsaV3_6G051670/CsaV3_7G030530/CsaV3_4G009240/CsaV3_3G027160/CsaV3_2G015210/CsaV3_3G032010/CsaV3_4G002070/CsaV3_7G033590/CsaV3_1G035670/CsaV3_7G033720/CsaV3_4G035350/CsaV3_3G046140	csv:101211692/csv:101204738/csv:101205275/csv:101215719/csv:101221194/csv:101213648/csv:101217570/csv:101217446/csv:101205767/csv:101217151/csv:101206897/csv:101217431/csv:101220009/csv:101215997/csv:101204949/csv:101220177	16	8	CsaV3_4G028790/CsaV3_1G009570/CsaV3_7G030530/CsaV3_4G009240/CsaV3_3G027160/CsaV3_7G033590/CsaV3_1G035670/CsaV3_7G033720	8	CsaV3_3G003250/CsaV3_6G031840/CsaV3_6G051670/CsaV3_2G015210/CsaV3_3G032010/CsaV3_4G002070/CsaV3_4G035350/CsaV3_3G046140
csv00310	Lysine degradation	16/2412	27/4184	0.514083	0.94525	CsaV3_5G023260/CsaV3_6G000070/CsaV3_1G001600/CsaV3_3G038540/CsaV3_4G024200/CsaV3_2G016440/CsaV3_7G034360/CsaV3_7G005590/CsaV3_3G040650/CsaV3_7G021930/CsaV3_3G015370/CsaV3_4G005260/CsaV3_1G015480/CsaV3_4G028150/CsaV3_3G027790/CsaV3_3G047160	CsaV3_5G023260/CsaV3_6G000070/CsaV3_1G001600/CsaV3_3G038540/CsaV3_4G024200/CsaV3_2G016440/CsaV3_7G034360/CsaV3_7G005590/CsaV3_3G040650/CsaV3_7G021930/CsaV3_3G015370/CsaV3_4G005260/CsaV3_1G015480/CsaV3_4G028150/CsaV3_3G027790/CsaV3_3G047160	csv:101220194/csv:101207718/csv:101209430/csv:101217644/csv:101205263/csv:101210052/csv:101205436/csv:101217644/csv:101205490/csv:101204042/csv:101222823/csv:101221321/csv:101212707/csv:101219329/csv:101204477/csv:101211572	16	12	CsaV3_5G023260/CsaV3_6G000070/CsaV3_1G001600/CsaV3_3G038540/CsaV3_4G024200/CsaV3_7G034360/CsaV3_7G005590/CsaV3_3G015370/CsaV3_4G005260/CsaV3_1G015480/CsaV3_4G028150/CsaV3_3G027790	4	CsaV3_2G016440/CsaV3_3G040650/CsaV3_7G021930/CsaV3_3G047160
csv00531	Glycosaminoglycan degradation	187250	15/4184	0.535918	0.956458	CsaV3_5G006710/CsaV3_3G032600/CsaV3_3G043450/CsaV3_2G016140/CsaV3_2G009420/CsaV3_1G005790/CsaV3_1G002710/CsaV3_1G001810/CsaV3_2G006730	CsaV3_5G006710/CsaV3_3G032600/CsaV3_3G043450/CsaV3_2G016140/CsaV3_2G009420/CsaV3_1G005790/CsaV3_1G002710/CsaV3_1G001810/CsaV3_2G006730	csv:101202942/csv:101211123/csv:101208875/csv:101220222/csv:101211792/csv:101220813/csv:101205085/csv:101210507/csv:101210116	9	5	CsaV3_5G006710/CsaV3_2G016140/CsaV3_2G009420/CsaV3_1G005790/CsaV3_2G006730	4	CsaV3_3G032600/CsaV3_3G043450/CsaV3_1G002710/CsaV3_1G001810
csv00195	Photosynthesis	30/2412	52/4184	0.556248	0.956458	CsaV3_3G013420/CsaV3_3G004330/CsaV3_2G004030/CsaV3_3G046150/CsaV3_2G009680/CsaV3_3G025000/CsaV3_7G027520/CsaV3_2G010090/CsaV3_6G042680/CsaV3_6G052210/CsaV3_1G011330/CsaV3_3G000770/CsaV3_4G007600/CsaV3_6G041600/CsaV3_1G046680/CsaV3_4G007520/CsaV3_1G015100/CsaV3_6G049050/CsaV3_7G004300/CsaV3_7G004050/CsaV3_3G019220/CsaV3_1G010750/CsaV3_3G013320/CsaV3_6G052330/CsaV3_6G053010/CsaV3_6G034480/CsaV3_3G0…	CsaV3_3G013420/CsaV3_3G004330/CsaV3_2G004030/CsaV3_3G046150/CsaV3_2G009680/CsaV3_3G025000/CsaV3_7G027520/CsaV3_2G010090/CsaV3_6G042680/CsaV3_6G052210/CsaV3_1G011330/CsaV3_3G000770/CsaV3_4G007600/CsaV3_6G041600/CsaV3_1G046680/CsaV3_4G007520/CsaV3_1G015100/CsaV3_6G049050/CsaV3_7G004300/CsaV3_7G004050/CsaV3_3G019220/CsaV3_1G010750/CsaV3_3G013320/CsaV3_6G052330/CsaV3_6G053010/CsaV3_6G034480/CsaV3_3G0…	csv:101207214/csv:101218641/csv:101203467/csv:101211484/csv:101208674/csv:101223219/csv:101218005/csv:101203850/csv:101203080/csv:101209832/csv:101209135/csv:101216095/csv:101215781/csv:101204396/csv:101215480/csv:101214094/csv:101209111/csv:101218747/csv:101204833/csv:101221828/csv:101204479/csv:101214408/csv:101206257/csv:101216935/csv:101222612/csv:101206477/csv:101221013/csv:101214682/csv:101…	30	28	CsaV3_3G013420/CsaV3_3G004330/CsaV3_2G004030/CsaV3_3G046150/CsaV3_2G009680/CsaV3_3G025000/CsaV3_7G027520/CsaV3_2G010090/CsaV3_6G042680/CsaV3_6G052210/CsaV3_1G011330/CsaV3_3G000770/CsaV3_4G007600/CsaV3_6G041600/CsaV3_1G046680/CsaV3_4G007520/CsaV3_1G015100/CsaV3_6G049050/CsaV3_7G004300/CsaV3_7G004050/CsaV3_3G019220/CsaV3_1G010750/CsaV3_3G013320/CsaV3_6G052330/CsaV3_6G053010/CsaV3_3G049310/CsaV3_2G0…	2	CsaV3_6G034480/CsaV3_3G005120
csv00562	Inositol phosphate metabolism	38/2412	66/4184	0.557055	0.956458	CsaV3_6G037410/CsaV3_5G010130/CsaV3_2G014550/CsaV3_2G036570/CsaV3_3G002010/CsaV3_5G010430/CsaV3_3G041100/CsaV3_4G002480/CsaV3_7G033960/CsaV3_1G036200/CsaV3_6G048460/CsaV3_2G033000/CsaV3_1G000490/CsaV3_5G027710/CsaV3_1G036180/CsaV3_5G010390/CsaV3_7G007110/CsaV3_5G036790/CsaV3_1G043430/CsaV3_4G028490/CsaV3_1G036210/CsaV3_2G012250/CsaV3_7G033950/CsaV3_2G012240/CsaV3_UNG190490/CsaV3_6G001840/CsaV3_3G…	CsaV3_6G037410/CsaV3_5G010130/CsaV3_2G014550/CsaV3_2G036570/CsaV3_3G002010/CsaV3_5G010430/CsaV3_3G041100/CsaV3_4G002480/CsaV3_7G033960/CsaV3_1G036200/CsaV3_6G048460/CsaV3_2G033000/CsaV3_1G000490/CsaV3_5G027710/CsaV3_1G036180/CsaV3_5G010390/CsaV3_7G007110/CsaV3_5G036790/CsaV3_1G043430/CsaV3_4G028490/CsaV3_1G036210/CsaV3_2G012250/CsaV3_7G033950/CsaV3_2G012240/CsaV3_UNG190490/CsaV3_6G001840/CsaV3_3G…	csv:101215596/csv:101212421/csv:101214424/csv:101218009/csv:101215556/csv:101205760/csv:101212127/csv:101222676/csv:101211666/csv:101209542/csv:101206261/csv:101218023/csv:101212856/csv:101209319/csv:101209785/csv:101221482/csv:101204924/csv:101220755/csv:101218054/csv:101208830/csv:101204232/csv:101221482/csv:101211666/csv:101216505/csv:101207441/csv:101203631/csv:101211366/csv:101213372/csv:101…	38	21	CsaV3_6G037410/CsaV3_5G010130/CsaV3_2G014550/CsaV3_2G036570/CsaV3_7G033960/CsaV3_1G036200/CsaV3_6G048460/CsaV3_2G033000/CsaV3_5G027710/CsaV3_7G007110/CsaV3_1G043430/CsaV3_4G028490/CsaV3_1G036210/CsaV3_2G012250/CsaV3_2G012240/CsaV3_UNG190490/CsaV3_2G015690/CsaV3_2G036580/CsaV3_2G024650/CsaV3_1G017150/CsaV3_7G023410	17	CsaV3_3G002010/CsaV3_5G010430/CsaV3_3G041100/CsaV3_4G002480/CsaV3_1G000490/CsaV3_1G036180/CsaV3_5G010390/CsaV3_5G036790/CsaV3_7G033950/CsaV3_6G001840/CsaV3_3G001540/CsaV3_6G043500/CsaV3_2G028930/CsaV3_3G036240/CsaV3_5G013590/CsaV3_2G016120/CsaV3_5G024510
csv00670	One carbon pool by folate	187280	17/4184	0.563306	0.956458	CsaV3_2G011710/CsaV3_1G042270/CsaV3_2G011840/CsaV3_1G010170/CsaV3_4G007440/CsaV3_6G005110/CsaV3_4G028640/CsaV3_7G034450/CsaV3_1G001940/CsaV3_2G030460	CsaV3_2G011710/CsaV3_1G042270/CsaV3_2G011840/CsaV3_1G010170/CsaV3_4G007440/CsaV3_6G005110/CsaV3_4G028640/CsaV3_7G034450/CsaV3_1G001940/CsaV3_2G030460	csv:101215910/csv:101216190/csv:101216871/csv:101206006/csv:101212892/csv:101222878/csv:101215287/csv:101203972/csv:101211739/csv:101222345	10	6	CsaV3_1G042270/CsaV3_1G010170/CsaV3_4G007440/CsaV3_6G005110/CsaV3_1G001940/CsaV3_2G030460	4	CsaV3_2G011710/CsaV3_2G011840/CsaV3_4G028640/CsaV3_7G034450
csv03410	Base excision repair	19/2412	33/4184	0.576723	0.956458	CsaV3_6G016510/CsaV3_6G046270/CsaV3_5G013250/CsaV3_5G005690/CsaV3_3G005270/CsaV3_6G014890/CsaV3_4G001910/CsaV3_3G022600/CsaV3_3G044900/CsaV3_6G038390/CsaV3_6G014300/CsaV3_6G015040/CsaV3_5G008820/CsaV3_6G047130/CsaV3_5G033540/CsaV3_5G037160/CsaV3_1G038240/CsaV3_6G013350/CsaV3_3G038830	CsaV3_6G016510/CsaV3_6G046270/CsaV3_5G013250/CsaV3_5G005690/CsaV3_3G005270/CsaV3_6G014890/CsaV3_4G001910/CsaV3_3G022600/CsaV3_3G044900/CsaV3_6G038390/CsaV3_6G014300/CsaV3_6G015040/CsaV3_5G008820/CsaV3_6G047130/CsaV3_5G033540/CsaV3_5G037160/CsaV3_1G038240/CsaV3_6G013350/CsaV3_3G038830	csv:101208473/csv:101219253/csv:101207581/csv:101209940/csv:101212518/csv:101208568/csv:101209571/csv:101219129/csv:101206397/csv:101218845/csv:101213447/csv:101203672/csv:101213310/csv:101222374/csv:101218195/csv:101211755/csv:101204273/csv:101218536/csv:101221438	19	9	CsaV3_6G046270/CsaV3_5G005690/CsaV3_3G005270/CsaV3_4G001910/CsaV3_3G022600/CsaV3_5G037160/CsaV3_1G038240/CsaV3_6G013350/CsaV3_3G038830	10	CsaV3_6G016510/CsaV3_5G013250/CsaV3_6G014890/CsaV3_3G044900/CsaV3_6G038390/CsaV3_6G014300/CsaV3_6G015040/CsaV3_5G008820/CsaV3_6G047130/CsaV3_5G033540
csv04070	Phosphatidylinositol signaling system	32/2412	56/4184	0.586822	0.956458	CsaV3_6G037410/CsaV3_5G010130/CsaV3_2G014550/CsaV3_2G036570/CsaV3_3G041100/CsaV3_4G002480/CsaV3_7G033960/CsaV3_1G036200/CsaV3_6G048460/CsaV3_5G036790/CsaV3_3G015240/CsaV3_4G028490/CsaV3_5G037850/CsaV3_1G036210/CsaV3_7G033950/CsaV3_6G001840/CsaV3_3G001540/CsaV3_2G036580/CsaV3_1G018390/CsaV3_6G043500/CsaV3_6G009150/CsaV3_2G024650/CsaV3_1G041870/CsaV3_1G029550/CsaV3_2G028930/CsaV3_5G037840/CsaV3_3G0…	CsaV3_6G037410/CsaV3_5G010130/CsaV3_2G014550/CsaV3_2G036570/CsaV3_3G041100/CsaV3_4G002480/CsaV3_7G033960/CsaV3_1G036200/CsaV3_6G048460/CsaV3_5G036790/CsaV3_3G015240/CsaV3_4G028490/CsaV3_5G037850/CsaV3_1G036210/CsaV3_7G033950/CsaV3_6G001840/CsaV3_3G001540/CsaV3_2G036580/CsaV3_1G018390/CsaV3_6G043500/CsaV3_6G009150/CsaV3_2G024650/CsaV3_1G041870/CsaV3_1G029550/CsaV3_2G028930/CsaV3_5G037840/CsaV3_3G0…	csv:101215596/csv:101212421/csv:101214424/csv:101218009/csv:101212127/csv:101222676/csv:101211666/csv:101209542/csv:101206261/csv:101220755/csv:101212685/csv:101208830/csv:101210866/csv:101204232/csv:101211666/csv:101203631/csv:101211366/csv:101223134/csv:101213706/csv:101213277/csv:101204532/csv:101210847/csv:101203816/csv:101219598/csv:101214357/csv:101210866/csv:101203066/csv:101218450/csv:101…	32	15	CsaV3_6G037410/CsaV3_5G010130/CsaV3_2G014550/CsaV3_2G036570/CsaV3_7G033960/CsaV3_1G036200/CsaV3_6G048460/CsaV3_4G028490/CsaV3_1G036210/CsaV3_2G036580/CsaV3_6G009150/CsaV3_2G024650/CsaV3_1G029550/CsaV3_1G017150/CsaV3_7G023410	17	CsaV3_3G041100/CsaV3_4G002480/CsaV3_5G036790/CsaV3_3G015240/CsaV3_5G037850/CsaV3_7G033950/CsaV3_6G001840/CsaV3_3G001540/CsaV3_1G018390/CsaV3_6G043500/CsaV3_1G041870/CsaV3_2G028930/CsaV3_5G037840/CsaV3_3G036240/CsaV3_5G013590/CsaV3_2G016120/CsaV3_5G024510
csv00510	N-Glycan biosynthesis	24/2412	42/4184	0.591202	0.956458	CsaV3_4G033140/CsaV3_6G031390/CsaV3_5G036240/CsaV3_2G019750/CsaV3_2G014400/CsaV3_4G024980/CsaV3_5G027050/CsaV3_3G001340/CsaV3_5G030370/CsaV3_5G031040/CsaV3_6G051700/CsaV3_6G049210/CsaV3_5G010300/CsaV3_1G024100/CsaV3_4G023360/CsaV3_7G000470/CsaV3_1G015830/CsaV3_4G037210/CsaV3_7G033750/CsaV3_7G029100/CsaV3_7G002510/CsaV3_1G007480/CsaV3_5G026660/CsaV3_3G020610	CsaV3_4G033140/CsaV3_6G031390/CsaV3_5G036240/CsaV3_2G019750/CsaV3_2G014400/CsaV3_4G024980/CsaV3_5G027050/CsaV3_3G001340/CsaV3_5G030370/CsaV3_5G031040/CsaV3_6G051700/CsaV3_6G049210/CsaV3_5G010300/CsaV3_1G024100/CsaV3_4G023360/CsaV3_7G000470/CsaV3_1G015830/CsaV3_4G037210/CsaV3_7G033750/CsaV3_7G029100/CsaV3_7G002510/CsaV3_1G007480/CsaV3_5G026660/CsaV3_3G020610	csv:101208085/csv:101217990/csv:101222475/csv:101208414/csv:101209991/csv:101214003/csv:101220682/csv:101204006/csv:101210818/csv:101222690/csv:101216212/csv:101215332/csv:101207680/csv:101210958/csv:101216959/csv:101215230/csv:101216794/csv:101222489/csv:101215522/csv:101211394/csv:101213679/csv:101206027/csv:101213832/csv:101213368	24	6	CsaV3_5G027050/CsaV3_5G030370/CsaV3_7G000470/CsaV3_7G029100/CsaV3_5G026660/CsaV3_3G020610	18	CsaV3_4G033140/CsaV3_6G031390/CsaV3_5G036240/CsaV3_2G019750/CsaV3_2G014400/CsaV3_4G024980/CsaV3_3G001340/CsaV3_5G031040/CsaV3_6G051700/CsaV3_6G049210/CsaV3_5G010300/CsaV3_1G024100/CsaV3_4G023360/CsaV3_1G015830/CsaV3_4G037210/CsaV3_7G033750/CsaV3_7G002510/CsaV3_1G007480
csv00860	Porphyrin and chlorophyll metabolism	25/2412	44/4184	0.607221	0.956458	CsaV3_2G025670/CsaV3_4G031720/CsaV3_4G033870/CsaV3_2G030530/CsaV3_1G000080/CsaV3_2G033150/CsaV3_7G031380/CsaV3_3G011480/CsaV3_1G002370/CsaV3_7G007370/CsaV3_6G050640/CsaV3_6G013410/CsaV3_4G017400/CsaV3_5G003370/CsaV3_2G013440/CsaV3_3G031800/CsaV3_2G016720/CsaV3_2G016730/CsaV3_4G008050/CsaV3_5G010770/CsaV3_6G004470/CsaV3_7G007260/CsaV3_2G028140/CsaV3_6G034450/CsaV3_5G027220	CsaV3_2G025670/CsaV3_4G031720/CsaV3_4G033870/CsaV3_2G030530/CsaV3_1G000080/CsaV3_2G033150/CsaV3_7G031380/CsaV3_3G011480/CsaV3_1G002370/CsaV3_7G007370/CsaV3_6G050640/CsaV3_6G013410/CsaV3_4G017400/CsaV3_5G003370/CsaV3_2G013440/CsaV3_3G031800/CsaV3_2G016720/CsaV3_2G016730/CsaV3_4G008050/CsaV3_5G010770/CsaV3_6G004470/CsaV3_7G007260/CsaV3_2G028140/CsaV3_6G034450/CsaV3_5G027220	csv:101216568/csv:101219179/csv:101208554/csv:101220615/csv:101206600/csv:101222312/csv:101222061/csv:101208123/csv:101221755/csv:101208135/csv:101217637/csv:101217584/csv:105435233/csv:101206296/csv:101203653/csv:101219749/csv:101223133/csv:101202861/csv:101212208/csv:101212245/csv:101212226/csv:101207399/csv:101203770/csv:101205768/csv:101223042	25	17	CsaV3_4G031720/CsaV3_4G033870/CsaV3_2G030530/CsaV3_1G000080/CsaV3_2G033150/CsaV3_3G011480/CsaV3_1G002370/CsaV3_6G050640/CsaV3_6G013410/CsaV3_5G003370/CsaV3_2G013440/CsaV3_3G031800/CsaV3_2G016730/CsaV3_4G008050/CsaV3_5G010770/CsaV3_6G004470/CsaV3_5G027220	8	CsaV3_2G025670/CsaV3_7G031380/CsaV3_7G007370/CsaV3_4G017400/CsaV3_2G016720/CsaV3_7G007260/CsaV3_2G028140/CsaV3_6G034450
csv03060	Protein export	25/2412	44/4184	0.607221	0.956458	CsaV3_6G040720/CsaV3_4G006570/CsaV3_6G021770/CsaV3_1G009720/CsaV3_4G008230/CsaV3_2G005090/CsaV3_2G028260/CsaV3_4G033950/CsaV3_2G007560/CsaV3_5G008920/CsaV3_3G039230/CsaV3_5G001960/CsaV3_5G031410/CsaV3_3G033870/CsaV3_3G009150/CsaV3_4G006230/CsaV3_3G007400/CsaV3_1G036760/CsaV3_1G039080/CsaV3_2G002780/CsaV3_6G051580/CsaV3_5G030580/CsaV3_2G013670/CsaV3_4G025830/CsaV3_1G042790	CsaV3_6G040720/CsaV3_4G006570/CsaV3_6G021770/CsaV3_1G009720/CsaV3_4G008230/CsaV3_2G005090/CsaV3_2G028260/CsaV3_4G033950/CsaV3_2G007560/CsaV3_5G008920/CsaV3_3G039230/CsaV3_5G001960/CsaV3_5G031410/CsaV3_3G033870/CsaV3_3G009150/CsaV3_4G006230/CsaV3_3G007400/CsaV3_1G036760/CsaV3_1G039080/CsaV3_2G002780/CsaV3_6G051580/CsaV3_5G030580/CsaV3_2G013670/CsaV3_4G025830/CsaV3_1G042790	csv:101209537/csv:101223070/csv:101211539/csv:101220011/csv:101206918/csv:101212303/csv:101222362/csv:101221060/csv:101217753/csv:101215389/csv:101206918/csv:101207505/csv:101218034/csv:101213655/csv:101205155/csv:101222972/csv:101220008/csv:101223050/csv:101210158/csv:101222464/csv:101209167/csv:101207391/csv:101215083/csv:101212893/csv:101212624	25	6	CsaV3_6G040720/CsaV3_6G021770/CsaV3_2G028260/CsaV3_3G009150/CsaV3_4G006230/CsaV3_3G007400	19	CsaV3_4G006570/CsaV3_1G009720/CsaV3_4G008230/CsaV3_2G005090/CsaV3_4G033950/CsaV3_2G007560/CsaV3_5G008920/CsaV3_3G039230/CsaV3_5G001960/CsaV3_5G031410/CsaV3_3G033870/CsaV3_1G036760/CsaV3_1G039080/CsaV3_2G002780/CsaV3_6G051580/CsaV3_5G030580/CsaV3_2G013670/CsaV3_4G025830/CsaV3_1G042790
csv00051	Fructose and mannose metabolism	30/2412	53/4184	0.618187	0.956458	CsaV3_3G016710/CsaV3_2G015280/CsaV3_6G006740/CsaV3_3G007870/CsaV3_5G004970/CsaV3_2G001890/CsaV3_1G046070/CsaV3_7G021470/CsaV3_4G025890/CsaV3_1G039980/CsaV3_1G043010/CsaV3_4G037690/CsaV3_6G044550/CsaV3_4G025880/CsaV3_6G016080/CsaV3_2G007730/CsaV3_4G008960/CsaV3_3G020950/CsaV3_6G039140/CsaV3_4G005730/CsaV3_5G028690/CsaV3_3G016700/CsaV3_2G001860/CsaV3_3G023460/CsaV3_2G015690/CsaV3_2G008080/CsaV3_2G0…	CsaV3_3G016710/CsaV3_2G015280/CsaV3_6G006740/CsaV3_3G007870/CsaV3_5G004970/CsaV3_2G001890/CsaV3_1G046070/CsaV3_7G021470/CsaV3_4G025890/CsaV3_1G039980/CsaV3_1G043010/CsaV3_4G037690/CsaV3_6G044550/CsaV3_4G025880/CsaV3_6G016080/CsaV3_2G007730/CsaV3_4G008960/CsaV3_3G020950/CsaV3_6G039140/CsaV3_4G005730/CsaV3_5G028690/CsaV3_3G016700/CsaV3_2G001860/CsaV3_3G023460/CsaV3_2G015690/CsaV3_2G008080/CsaV3_2G0…	csv:101221690/csv:101204323/csv:101213366/csv:101204338/csv:101220595/csv:101218300/csv:101215219/csv:101219476/csv:101211447/csv:101202739/csv:101215511/csv:101208728/csv:101219491/csv:101211927/csv:101214487/csv:101216327/csv:101219465/csv:101223130/csv:101208701/csv:101208005/csv:101218080/csv:101221918/csv:101218300/csv:101220704/csv:101213372/csv:101209640/csv:101218300/csv:101211496/csv:101…	30	18	CsaV3_3G016710/CsaV3_2G015280/CsaV3_2G001890/CsaV3_1G046070/CsaV3_7G021470/CsaV3_4G025890/CsaV3_1G039980/CsaV3_1G043010/CsaV3_4G025880/CsaV3_2G007730/CsaV3_3G020950/CsaV3_5G028690/CsaV3_3G016700/CsaV3_2G001860/CsaV3_2G015690/CsaV3_2G008080/CsaV3_2G001900/CsaV3_4G004200	12	CsaV3_6G006740/CsaV3_3G007870/CsaV3_5G004970/CsaV3_4G037690/CsaV3_6G044550/CsaV3_6G016080/CsaV3_4G008960/CsaV3_6G039140/CsaV3_4G005730/CsaV3_3G023460/CsaV3_6G001370/CsaV3_6G048090
csv00590	Arachidonic acid metabolism	187219	14/4184	0.62559	0.956458	CsaV3_1G032150/CsaV3_4G036450/CsaV3_1G004390/CsaV3_5G026050/CsaV3_2G024290/CsaV3_2G001680/CsaV3_5G030140/CsaV3_5G002900	CsaV3_1G032150/CsaV3_4G036450/CsaV3_1G004390/CsaV3_5G026050/CsaV3_2G024290/CsaV3_2G001680/CsaV3_5G030140/CsaV3_5G002900	csv:101203184/csv:101211107/csv:101221439/csv:101214564/csv:101215364/csv:101221216/csv:101215260/csv:101220688	8	4	CsaV3_4G036450/CsaV3_5G026050/CsaV3_2G001680/CsaV3_5G030140	4	CsaV3_1G032150/CsaV3_1G004390/CsaV3_2G024290/CsaV3_5G002900
csv00565	Ether lipid metabolism	13/2412	23/4184	0.629249	0.956458	CsaV3_1G032150/CsaV3_4G001530/CsaV3_7G032480/CsaV3_6G005980/CsaV3_2G028530/CsaV3_3G009390/CsaV3_3G003480/CsaV3_2G006790/CsaV3_1G000490/CsaV3_1G043430/CsaV3_2G024470/CsaV3_6G047530/CsaV3_4G036540	CsaV3_1G032150/CsaV3_4G001530/CsaV3_7G032480/CsaV3_6G005980/CsaV3_2G028530/CsaV3_3G009390/CsaV3_3G003480/CsaV3_2G006790/CsaV3_1G000490/CsaV3_1G043430/CsaV3_2G024470/CsaV3_6G047530/CsaV3_4G036540	csv:101203184/csv:101215246/csv:101206113/csv:101218942/csv:101218421/csv:101209255/csv:101208016/csv:101220522/csv:101212856/csv:101218054/csv:101213442/csv:101217251/csv:101213538	13	6	CsaV3_4G001530/CsaV3_2G028530/CsaV3_3G009390/CsaV3_2G006790/CsaV3_1G043430/CsaV3_6G047530	7	CsaV3_1G032150/CsaV3_7G032480/CsaV3_6G005980/CsaV3_3G003480/CsaV3_1G000490/CsaV3_2G024470/CsaV3_4G036540
csv00730	Thiamine metabolism	13/2412	23/4184	0.629249	0.956458	CsaV3_1G036050/CsaV3_3G027210/CsaV3_6G005620/CsaV3_3G006930/CsaV3_4G024410/CsaV3_5G006390/CsaV3_2G031800/CsaV3_1G045030/CsaV3_6G032280/CsaV3_3G005340/CsaV3_1G000690/CsaV3_5G012700/CsaV3_7G029140	CsaV3_1G036050/CsaV3_3G027210/CsaV3_6G005620/CsaV3_3G006930/CsaV3_4G024410/CsaV3_5G006390/CsaV3_2G031800/CsaV3_1G045030/CsaV3_6G032280/CsaV3_3G005340/CsaV3_1G000690/CsaV3_5G012700/CsaV3_7G029140	csv:101213554/csv:101217918/csv:101214927/csv:101218190/csv:101221997/csv:101221935/csv:101220427/csv:101217744/csv:101206221/csv:101211553/csv:101216714/csv:101222631/csv:101210895	13	9	CsaV3_1G036050/CsaV3_6G005620/CsaV3_3G006930/CsaV3_5G006390/CsaV3_2G031800/CsaV3_6G032280/CsaV3_3G005340/CsaV3_5G012700/CsaV3_7G029140	4	CsaV3_3G027210/CsaV3_4G024410/CsaV3_1G045030/CsaV3_1G000690
csv03015	mRNA surveillance pathway	54/2412	96/4184	0.651377	0.977066	CsaV3_3G036430/CsaV3_2G032030/CsaV3_1G037380/CsaV3_1G017060/CsaV3_3G031460/CsaV3_3G046990/CsaV3_2G006670/CsaV3_4G026290/CsaV3_2G030670/CsaV3_2G001320/CsaV3_4G024700/CsaV3_2G031630/CsaV3_3G018370/CsaV3_7G035250/CsaV3_5G026020/CsaV3_1G033610/CsaV3_3G017220/CsaV3_1G037370/CsaV3_3G014300/CsaV3_2G014290/CsaV3_5G029980/CsaV3_6G004880/CsaV3_3G007250/CsaV3_5G039520/CsaV3_1G043450/CsaV3_1G001420/CsaV3_7G0…	CsaV3_3G036430/CsaV3_2G032030/CsaV3_1G037380/CsaV3_1G017060/CsaV3_3G031460/CsaV3_3G046990/CsaV3_2G006670/CsaV3_4G026290/CsaV3_2G030670/CsaV3_2G001320/CsaV3_4G024700/CsaV3_2G031630/CsaV3_3G018370/CsaV3_7G035250/CsaV3_5G026020/CsaV3_1G033610/CsaV3_3G017220/CsaV3_1G037370/CsaV3_3G014300/CsaV3_2G014290/CsaV3_5G029980/CsaV3_6G004880/CsaV3_3G007250/CsaV3_5G039520/CsaV3_1G043450/CsaV3_1G001420/CsaV3_7G0…	csv:101203793/csv:101217346/csv:101215977/csv:101217028/csv:101222664/csv:101219939/csv:101211101/csv:101213136/csv:101205459/csv:101206856/csv:101218139/csv:101203139/csv:101219802/csv:101204291/csv:101214324/csv:101221953/csv:101215673/csv:101215977/csv:101220802/csv:101222679/csv:101221902/csv:101219081/csv:101218026/csv:101220043/csv:101220502/csv:101206601/csv:101217120/csv:101202828/csv:101…	54	26	CsaV3_1G037380/CsaV3_3G031460/CsaV3_2G006670/CsaV3_4G026290/CsaV3_2G030670/CsaV3_2G031630/CsaV3_3G018370/CsaV3_7G035250/CsaV3_5G026020/CsaV3_1G033610/CsaV3_1G037370/CsaV3_3G014300/CsaV3_2G014290/CsaV3_6G004880/CsaV3_1G001420/CsaV3_3G048300/CsaV3_4G031660/CsaV3_3G042740/CsaV3_3G009050/CsaV3_UNG186470/CsaV3_3G022660/CsaV3_3G018690/CsaV3_1G004910/CsaV3_2G010350/CsaV3_4G004840/CsaV3_3G020960	28	CsaV3_3G036430/CsaV3_2G032030/CsaV3_1G017060/CsaV3_3G046990/CsaV3_2G001320/CsaV3_4G024700/CsaV3_3G017220/CsaV3_5G029980/CsaV3_3G007250/CsaV3_5G039520/CsaV3_1G043450/CsaV3_7G034890/CsaV3_6G004530/CsaV3_4G023390/CsaV3_5G029960/CsaV3_6G017140/CsaV3_3G004430/CsaV3_6G036040/CsaV3_2G002500/CsaV3_4G010150/CsaV3_4G025970/CsaV3_1G006160/CsaV3_5G035710/CsaV3_3G043980/CsaV3_2G016830/CsaV3_5G008430/CsaV3_4G0…
csv00561	Glycerolipid metabolism	36/2412	65/4184	0.692515	0.998997	CsaV3_3G009130/CsaV3_2G030770/CsaV3_5G010860/CsaV3_2G001380/CsaV3_1G001600/CsaV3_3G015560/CsaV3_1G011950/CsaV3_6G014580/CsaV3_2G032580/CsaV3_7G023230/CsaV3_3G039170/CsaV3_3G034100/CsaV3_4G000810/CsaV3_4G024200/CsaV3_5G029190/CsaV3_6G041120/CsaV3_7G034360/CsaV3_3G033310/CsaV3_4G025300/CsaV3_1G007380/CsaV3_3G034040/CsaV3_7G032960/CsaV3_4G030910/CsaV3_7G034580/CsaV3_4G024550/CsaV3_4G025340/CsaV3_6G0…	CsaV3_3G009130/CsaV3_2G030770/CsaV3_5G010860/CsaV3_2G001380/CsaV3_1G001600/CsaV3_3G015560/CsaV3_1G011950/CsaV3_6G014580/CsaV3_2G032580/CsaV3_7G023230/CsaV3_3G039170/CsaV3_3G034100/CsaV3_4G000810/CsaV3_4G024200/CsaV3_5G029190/CsaV3_6G041120/CsaV3_7G034360/CsaV3_3G033310/CsaV3_4G025300/CsaV3_1G007380/CsaV3_3G034040/CsaV3_7G032960/CsaV3_4G030910/CsaV3_7G034580/CsaV3_4G024550/CsaV3_4G025340/CsaV3_6G0…	csv:101204668/csv:101218489/csv:101210778/csv:101213517/csv:101209430/csv:101205287/csv:101206306/csv:101215610/csv:101209030/csv:101216983/csv:101206198/csv:101214624/csv:101214595/csv:101205263/csv:101211924/csv:101218383/csv:101205436/csv:101204929/csv:101210436/csv:101210503/csv:101214865/csv:101222060/csv:101205213/csv:101222563/csv:101210022/csv:101209692/csv:101221986/csv:101219598/csv:101…	36	21	CsaV3_2G030770/CsaV3_5G010860/CsaV3_1G001600/CsaV3_3G015560/CsaV3_1G011950/CsaV3_3G034100/CsaV3_4G024200/CsaV3_6G041120/CsaV3_7G034360/CsaV3_3G033310/CsaV3_4G025300/CsaV3_3G034040/CsaV3_7G032960/CsaV3_4G030910/CsaV3_7G034580/CsaV3_4G025340/CsaV3_1G029550/CsaV3_4G005260/CsaV3_4G028150/CsaV3_5G039220/CsaV3_4G035660	15	CsaV3_3G009130/CsaV3_2G001380/CsaV3_6G014580/CsaV3_2G032580/CsaV3_7G023230/CsaV3_3G039170/CsaV3_4G000810/CsaV3_5G029190/CsaV3_1G007380/CsaV3_4G024550/CsaV3_6G001960/CsaV3_1G042840/CsaV3_2G008470/CsaV3_4G025310/CsaV3_2G003280
csv00514	Other types of O-glycan biosynthesis	187158	834521	0.699408	0.998997	CsaV3_6G035870/CsaV3_6G040850/CsaV3_2G032270/CsaV3_4G027890/CsaV3_3G027570/CsaV3_3G044930	CsaV3_6G035870/CsaV3_6G040850/CsaV3_2G032270/CsaV3_4G027890/CsaV3_3G027570/CsaV3_3G044930	csv:101220530/csv:101215452/csv:101214063/csv:101203732/csv:101221472/csv:101205922	6	1	CsaV3_6G040850	5	CsaV3_6G035870/CsaV3_2G032270/CsaV3_4G027890/CsaV3_3G027570/CsaV3_3G044930
csv00130	Ubiquinone and other terpenoid-quinone biosynthesis	23/2412	42/4184	0.706187	0.998997	CsaV3_1G031500/CsaV3_6G015650/CsaV3_1G013520/CsaV3_3G005530/CsaV3_3G030410/CsaV3_6G049520/CsaV3_2G014380/CsaV3_5G031500/CsaV3_2G009070/CsaV3_7G031610/CsaV3_4G032000/CsaV3_2G030970/CsaV3_6G013150/CsaV3_6G052370/CsaV3_2G008500/CsaV3_6G015190/CsaV3_1G026620/CsaV3_1G009470/CsaV3_5G030200/CsaV3_3G032630/CsaV3_5G033620/CsaV3_3G038470/CsaV3_1G012970	CsaV3_1G031500/CsaV3_6G015650/CsaV3_1G013520/CsaV3_3G005530/CsaV3_3G030410/CsaV3_6G049520/CsaV3_2G014380/CsaV3_5G031500/CsaV3_2G009070/CsaV3_7G031610/CsaV3_4G032000/CsaV3_2G030970/CsaV3_6G013150/CsaV3_6G052370/CsaV3_2G008500/CsaV3_6G015190/CsaV3_1G026620/CsaV3_1G009470/CsaV3_5G030200/CsaV3_3G032630/CsaV3_5G033620/CsaV3_3G038470/CsaV3_1G012970	csv:101218077/csv:101220123/csv:101220141/csv:101209481/csv:101219578/csv:101214126/csv:101211762/csv:101216706/csv:101205537/csv:101218361/csv:101215051/csv:101206720/csv:101221846/csv:101212842/csv:101221791/csv:101221092/csv:101208511/csv:101211791/csv:101220731/csv:101215427/csv:101217012/csv:101215980/csv:101222437	23	15	CsaV3_1G031500/CsaV3_3G030410/CsaV3_6G049520/CsaV3_2G014380/CsaV3_5G031500/CsaV3_4G032000/CsaV3_2G030970/CsaV3_6G052370/CsaV3_2G008500/CsaV3_6G015190/CsaV3_1G026620/CsaV3_1G009470/CsaV3_5G030200/CsaV3_5G033620/CsaV3_3G038470	8	CsaV3_6G015650/CsaV3_1G013520/CsaV3_3G005530/CsaV3_2G009070/CsaV3_7G031610/CsaV3_6G013150/CsaV3_3G032630/CsaV3_1G012970
csv00073	Cutin, suberine and wax biosynthesis	13/2412	24/4184	0.71203	0.998997	CsaV3_6G006560/CsaV3_3G031760/CsaV3_2G009920/CsaV3_6G004090/CsaV3_7G030640/CsaV3_1G036060/CsaV3_3G010290/CsaV3_3G010300/CsaV3_3G014530/CsaV3_1G030900/CsaV3_6G014940/CsaV3_5G002710/CsaV3_7G034800	CsaV3_6G006560/CsaV3_3G031760/CsaV3_2G009920/CsaV3_6G004090/CsaV3_7G030640/CsaV3_1G036060/CsaV3_3G010290/CsaV3_3G010300/CsaV3_3G014530/CsaV3_1G030900/CsaV3_6G014940/CsaV3_5G002710/CsaV3_7G034800	csv:101222843/csv:101222831/csv:101205541/csv:101206763/csv:101212202/csv:101214516/csv:101221193/csv:101203441/csv:101210493/csv:101212905/csv:101209297/csv:101216733/csv:101209117	13	7	CsaV3_6G006560/CsaV3_6G004090/CsaV3_7G030640/CsaV3_1G036060/CsaV3_3G010290/CsaV3_3G014530/CsaV3_7G034800	6	CsaV3_3G031760/CsaV3_2G009920/CsaV3_3G010300/CsaV3_1G030900/CsaV3_6G014940/CsaV3_5G002710
csv00790	Folate biosynthesis	13/2412	24/4184	0.71203	0.998997	CsaV3_4G033410/CsaV3_6G038720/CsaV3_4G037860/CsaV3_6G051460/CsaV3_3G048670/CsaV3_1G041840/CsaV3_5G037300/CsaV3_5G004930/CsaV3_5G030140/CsaV3_1G041250/CsaV3_6G013680/CsaV3_3G040860/CsaV3_4G033040	CsaV3_4G033410/CsaV3_6G038720/CsaV3_4G037860/CsaV3_6G051460/CsaV3_3G048670/CsaV3_1G041840/CsaV3_5G037300/CsaV3_5G004930/CsaV3_5G030140/CsaV3_1G041250/CsaV3_6G013680/CsaV3_3G040860/CsaV3_4G033040	csv:101212163/csv:101223106/csv:101210375/csv:101207464/csv:101216383/csv:101214811/csv:101209617/csv:101220833/csv:101215260/csv:101211911/csv:101220625/csv:101208053/csv:101206873	13	11	CsaV3_4G033410/CsaV3_4G037860/CsaV3_6G051460/CsaV3_3G048670/CsaV3_1G041840/CsaV3_5G037300/CsaV3_5G004930/CsaV3_5G030140/CsaV3_1G041250/CsaV3_6G013680/CsaV3_3G040860	2	CsaV3_6G038720/CsaV3_4G033040
csv00071	Fatty acid degradation	29/2412	53/4184	0.718577	0.998997	CsaV3_3G028760/CsaV3_1G001600/CsaV3_6G023960/CsaV3_3G014880/CsaV3_6G025310/CsaV3_6G031750/CsaV3_7G002420/CsaV3_7G024950/CsaV3_4G024200/CsaV3_3G033630/CsaV3_7G034360/CsaV3_1G036060/CsaV3_7G024990/CsaV3_3G026550/CsaV3_6G025240/CsaV3_6G022310/CsaV3_5G002040/CsaV3_2G002170/CsaV3_2G011380/CsaV3_5G026420/CsaV3_2G034560/CsaV3_3G011240/CsaV3_6G023910/CsaV3_4G005260/CsaV3_6G024110/CsaV3_1G015480/CsaV3_6G0…	CsaV3_3G028760/CsaV3_1G001600/CsaV3_6G023960/CsaV3_3G014880/CsaV3_6G025310/CsaV3_6G031750/CsaV3_7G002420/CsaV3_7G024950/CsaV3_4G024200/CsaV3_3G033630/CsaV3_7G034360/CsaV3_1G036060/CsaV3_7G024990/CsaV3_3G026550/CsaV3_6G025240/CsaV3_6G022310/CsaV3_5G002040/CsaV3_2G002170/CsaV3_2G011380/CsaV3_5G026420/CsaV3_2G034560/CsaV3_3G011240/CsaV3_6G023910/CsaV3_4G005260/CsaV3_6G024110/CsaV3_1G015480/CsaV3_6G0…	csv:101208182/csv:101209430/csv:101218899/csv:101207559/csv:101218899/csv:101212881/csv:101212158/csv:101209854/csv:101205263/csv:101209181/csv:101205436/csv:101214516/csv:101206036/csv:101222275/csv:101218899/csv:101210295/csv:101209130/csv:101209359/csv:101212301/csv:101209864/csv:101220632/csv:101217710/csv:101218899/csv:101221321/csv:101218899/csv:101212707/csv:101212704/csv:101219329/csv:101…	29	25	CsaV3_1G001600/CsaV3_6G023960/CsaV3_3G014880/CsaV3_6G025310/CsaV3_7G002420/CsaV3_7G024950/CsaV3_4G024200/CsaV3_3G033630/CsaV3_7G034360/CsaV3_1G036060/CsaV3_7G024990/CsaV3_3G026550/CsaV3_6G025240/CsaV3_6G022310/CsaV3_2G002170/CsaV3_2G011380/CsaV3_2G034560/CsaV3_3G011240/CsaV3_6G023910/CsaV3_4G005260/CsaV3_6G024110/CsaV3_1G015480/CsaV3_6G001070/CsaV3_4G028150/CsaV3_6G024060	4	CsaV3_3G028760/CsaV3_6G031750/CsaV3_5G002040/CsaV3_5G026420
csv00908	Zeatin biosynthesis	187280	19/4184	0.752091	0.999999	CsaV3_4G028910/CsaV3_4G036030/CsaV3_5G039210/CsaV3_3G013770/CsaV3_7G028650/CsaV3_2G029070/CsaV3_3G040790/CsaV3_5G006200/CsaV3_6G018570/CsaV3_4G028960	CsaV3_4G028910/CsaV3_4G036030/CsaV3_5G039210/CsaV3_3G013770/CsaV3_7G028650/CsaV3_2G029070/CsaV3_3G040790/CsaV3_5G006200/CsaV3_6G018570/CsaV3_4G028960	csv:101210715/csv:101217899/csv:101215037/csv:101204427/csv:101217256/csv:101212272/csv:101217722/csv:101205347/csv:101215150/csv:101210219	10	4	CsaV3_4G028910/CsaV3_4G036030/CsaV3_7G028650/CsaV3_4G028960	6	CsaV3_5G039210/CsaV3_3G013770/CsaV3_2G029070/CsaV3_3G040790/CsaV3_5G006200/CsaV3_6G018570
csv00460	Cyanoamino acid metabolism	22/2412	41/4184	0.752373	0.999999	CsaV3_2G008170/CsaV3_2G011710/CsaV3_4G033920/CsaV3_2G010460/CsaV3_3G043060/CsaV3_1G007040/CsaV3_6G000650/CsaV3_2G001680/CsaV3_7G033870/CsaV3_4G007440/CsaV3_1G010960/CsaV3_2G015230/CsaV3_4G028640/CsaV3_6G043980/CsaV3_1G004550/CsaV3_2G030460/CsaV3_1G036000/CsaV3_1G039010/CsaV3_3G044560/CsaV3_2G008210/CsaV3_5G035070/novel.202	CsaV3_2G008170/CsaV3_2G011710/CsaV3_4G033920/CsaV3_2G010460/CsaV3_3G043060/CsaV3_1G007040/CsaV3_6G000650/CsaV3_2G001680/CsaV3_7G033870/CsaV3_4G007440/CsaV3_1G010960/CsaV3_2G015230/CsaV3_4G028640/CsaV3_6G043980/CsaV3_1G004550/CsaV3_2G030460/CsaV3_1G036000/CsaV3_1G039010/CsaV3_3G044560/CsaV3_2G008210/CsaV3_5G035070/-	csv:101213549/csv:101215910/csv:101220587/csv:101220742/csv:101223112/csv:101218046/csv:101220896/csv:101221216/csv:101214723/csv:101212892/csv:101209136/csv:101211593/csv:101215287/csv:101206142/csv:101204835/csv:101222345/csv:101214999/csv:101208927/csv:101215384/csv:101218493/csv:101209588/csv:101210312	22	15	CsaV3_4G033920/CsaV3_2G010460/CsaV3_6G000650/CsaV3_2G001680/CsaV3_7G033870/CsaV3_4G007440/CsaV3_1G010960/CsaV3_6G043980/CsaV3_1G004550/CsaV3_2G030460/CsaV3_1G036000/CsaV3_3G044560/CsaV3_2G008210/CsaV3_5G035070/novel.202	7	CsaV3_2G008170/CsaV3_2G011710/CsaV3_3G043060/CsaV3_1G007040/CsaV3_2G015230/CsaV3_4G028640/CsaV3_1G039010
csv00960	Tropane, piperidine and pyridine alkaloid biosynthesis	187311	21/4184	0.762792	0.999999	CsaV3_5G003790/CsaV3_5G003800/CsaV3_4G000360/CsaV3_6G038140/CsaV3_5G008370/CsaV3_3G034610/CsaV3_2G032340/CsaV3_6G015190/CsaV3_3G047470/CsaV3_1G013270/CsaV3_6G038150	CsaV3_5G003790/CsaV3_5G003800/CsaV3_4G000360/CsaV3_6G038140/CsaV3_5G008370/CsaV3_3G034610/CsaV3_2G032340/CsaV3_6G015190/CsaV3_3G047470/CsaV3_1G013270/CsaV3_6G038150	csv:101213059/csv:101212818/csv:101212914/csv:101222232/csv:101218095/csv:101206201/csv:101213342/csv:101221092/csv:101213892/csv:101217299/csv:101222468	11	8	CsaV3_5G003790/CsaV3_5G003800/CsaV3_5G008370/CsaV3_3G034610/CsaV3_2G032340/CsaV3_6G015190/CsaV3_3G047470/CsaV3_6G038150	3	CsaV3_4G000360/CsaV3_6G038140/CsaV3_1G013270
csv04130	SNARE interactions in vesicular transport	18/2412	34/4184	0.768915	0.999999	CsaV3_3G046300/CsaV3_3G022610/CsaV3_7G034220/CsaV3_3G038070/CsaV3_6G006300/CsaV3_3G043100/CsaV3_7G021020/CsaV3_3G023820/CsaV3_2G006850/CsaV3_3G030880/CsaV3_3G047800/CsaV3_3G017070/CsaV3_4G002040/CsaV3_4G012110/CsaV3_3G030420/CsaV3_3G004560/CsaV3_6G038420/CsaV3_5G008990	CsaV3_3G046300/CsaV3_3G022610/CsaV3_7G034220/CsaV3_3G038070/CsaV3_6G006300/CsaV3_3G043100/CsaV3_7G021020/CsaV3_3G023820/CsaV3_2G006850/CsaV3_3G030880/CsaV3_3G047800/CsaV3_3G017070/CsaV3_4G002040/CsaV3_4G012110/CsaV3_3G030420/CsaV3_3G004560/CsaV3_6G038420/CsaV3_5G008990	csv:101209595/csv:101218891/csv:101208227/csv:101208931/csv:101212527/csv:101203075/csv:101208669/csv:101210391/csv:101207998/csv:101208227/csv:101207709/csv:101213515/csv:101207624/csv:101220150/csv:101219819/csv:101223140/csv:101218607/csv:101213786	18	8	CsaV3_3G046300/CsaV3_3G022610/CsaV3_3G043100/CsaV3_7G021020/CsaV3_3G030880/CsaV3_4G002040/CsaV3_3G030420/CsaV3_5G008990	10	CsaV3_7G034220/CsaV3_3G038070/CsaV3_6G006300/CsaV3_3G023820/CsaV3_2G006850/CsaV3_3G047800/CsaV3_3G017070/CsaV3_4G012110/CsaV3_3G004560/CsaV3_6G038420
csv00770	Pantothenate and CoA biosynthesis	187341	23/4184	0.772772	0.999999	CsaV3_4G000530/CsaV3_2G025820/CsaV3_7G006870/CsaV3_7G005980/CsaV3_1G007330/CsaV3_1G008520/CsaV3_7G025860/CsaV3_6G035700/CsaV3_3G014460/CsaV3_1G009240/CsaV3_6G038890/CsaV3_1G044260	CsaV3_4G000530/CsaV3_2G025820/CsaV3_7G006870/CsaV3_7G005980/CsaV3_1G007330/CsaV3_1G008520/CsaV3_7G025860/CsaV3_6G035700/CsaV3_3G014460/CsaV3_1G009240/CsaV3_6G038890/CsaV3_1G044260	csv:101209408/csv:101214004/csv:101223016/csv:101213336/csv:101202899/csv:101203117/csv:101207725/csv:101214416/csv:101222371/csv:101211378/csv:101204944/csv:101208212	12	8	CsaV3_4G000530/CsaV3_2G025820/CsaV3_7G006870/CsaV3_1G007330/CsaV3_1G008520/CsaV3_6G035700/CsaV3_3G014460/CsaV3_1G044260	4	CsaV3_7G005980/CsaV3_7G025860/CsaV3_1G009240/CsaV3_6G038890
csv01212	Fatty acid metabolism	36/2412	67/4184	0.782546	0.999999	CsaV3_1G030920/CsaV3_3G028760/CsaV3_3G006860/CsaV3_6G023960/CsaV3_1G032580/CsaV3_3G014880/CsaV3_3G038870/CsaV3_6G025310/CsaV3_7G002420/CsaV3_3G033630/CsaV3_1G012760/CsaV3_4G023750/CsaV3_3G026550/CsaV3_6G025240/CsaV3_6G022310/CsaV3_4G008750/CsaV3_6G015580/CsaV3_5G002040/CsaV3_2G002170/CsaV3_5G023610/CsaV3_2G011380/CsaV3_5G003990/CsaV3_2G034560/CsaV3_5G030680/CsaV3_3G011240/CsaV3_4G024940/CsaV3_5G0…	CsaV3_1G030920/CsaV3_3G028760/CsaV3_3G006860/CsaV3_6G023960/CsaV3_1G032580/CsaV3_3G014880/CsaV3_3G038870/CsaV3_6G025310/CsaV3_7G002420/CsaV3_3G033630/CsaV3_1G012760/CsaV3_4G023750/CsaV3_3G026550/CsaV3_6G025240/CsaV3_6G022310/CsaV3_4G008750/CsaV3_6G015580/CsaV3_5G002040/CsaV3_2G002170/CsaV3_5G023610/CsaV3_2G011380/CsaV3_5G003990/CsaV3_2G034560/CsaV3_5G030680/CsaV3_3G011240/CsaV3_4G024940/CsaV3_5G0…	csv:101210955/csv:101208182/csv:101214048/csv:101218899/csv:101210781/csv:101207559/csv:101222623/csv:101218899/csv:101212158/csv:101209181/csv:101215312/csv:101210519/csv:101222275/csv:101218899/csv:101210295/csv:101222930/csv:101220594/csv:101209130/csv:101209359/csv:101212380/csv:101212301/csv:101215700/csv:101220632/csv:101206427/csv:101217710/csv:101213758/csv:101222043/csv:101218899/csv:101…	36	26	CsaV3_6G023960/CsaV3_3G014880/CsaV3_3G038870/CsaV3_6G025310/CsaV3_7G002420/CsaV3_3G033630/CsaV3_1G012760/CsaV3_3G026550/CsaV3_6G025240/CsaV3_6G022310/CsaV3_2G002170/CsaV3_5G023610/CsaV3_2G011380/CsaV3_5G003990/CsaV3_2G034560/CsaV3_5G030680/CsaV3_3G011240/CsaV3_5G004490/CsaV3_6G023910/CsaV3_1G042350/CsaV3_6G024110/CsaV3_1G015480/CsaV3_6G001070/CsaV3_6G022170/CsaV3_6G024060/CsaV3_4G025950	10	CsaV3_1G030920/CsaV3_3G028760/CsaV3_3G006860/CsaV3_1G032580/CsaV3_4G023750/CsaV3_4G008750/CsaV3_6G015580/CsaV3_5G002040/CsaV3_4G024940/CsaV3_4G004790
csv00905	Brassinosteroid biosynthesis	187188	14/4184	0.803282	0.999999	CsaV3_4G005090/CsaV3_5G010070/CsaV3_3G034190/CsaV3_5G033460/CsaV3_2G002660/CsaV3_5G026940/CsaV3_3G030690	CsaV3_4G005090/CsaV3_5G010070/CsaV3_3G034190/CsaV3_5G033460/CsaV3_2G002660/CsaV3_5G026940/CsaV3_3G030690	csv:101211854/csv:101216594/csv:101217020/csv:101219145/csv:101208789/csv:101215045/csv:101203328	7	3	CsaV3_4G005090/CsaV3_5G026940/CsaV3_3G030690	4	CsaV3_5G010070/CsaV3_3G034190/CsaV3_5G033460/CsaV3_2G002660
csv00600	Sphingolipid metabolism	187311	22/4184	0.827693	0.999999	CsaV3_5G010860/CsaV3_5G039980/CsaV3_1G012180/CsaV3_5G029190/CsaV3_3G010870/CsaV3_6G016520/CsaV3_6G048550/CsaV3_2G026490/CsaV3_2G011410/CsaV3_2G010670/CsaV3_3G013580	CsaV3_5G010860/CsaV3_5G039980/CsaV3_1G012180/CsaV3_5G029190/CsaV3_3G010870/CsaV3_6G016520/CsaV3_6G048550/CsaV3_2G026490/CsaV3_2G011410/CsaV3_2G010670/CsaV3_3G013580	csv:101210778/csv:101204709/csv:101207762/csv:101211924/csv:101212358/csv:101208232/csv:101205550/csv:101204467/csv:101213022/csv:101203795/csv:101208848	11	6	CsaV3_5G010860/CsaV3_6G016520/CsaV3_2G026490/CsaV3_2G011410/CsaV3_2G010670/CsaV3_3G013580	5	CsaV3_5G039980/CsaV3_1G012180/CsaV3_5G029190/CsaV3_3G010870/CsaV3_6G048550
csv01040	Biosynthesis of unsaturated fatty acids	187311	22/4184	0.827693	0.999999	CsaV3_3G028760/CsaV3_3G006860/CsaV3_3G038870/CsaV3_3G033630/CsaV3_3G008950/CsaV3_2G011380/CsaV3_2G034560/CsaV3_5G030680/CsaV3_3G011240/CsaV3_4G024940/CsaV3_6G022170	CsaV3_3G028760/CsaV3_3G006860/CsaV3_3G038870/CsaV3_3G033630/CsaV3_3G008950/CsaV3_2G011380/CsaV3_2G034560/CsaV3_5G030680/CsaV3_3G011240/CsaV3_4G024940/CsaV3_6G022170	csv:101208182/csv:101214048/csv:101222623/csv:101209181/csv:101222848/csv:101212301/csv:101220632/csv:101206427/csv:101217710/csv:101213758/csv:101212013	11	8	CsaV3_3G038870/CsaV3_3G033630/CsaV3_3G008950/CsaV3_2G011380/CsaV3_2G034560/CsaV3_5G030680/CsaV3_3G011240/CsaV3_6G022170	3	CsaV3_3G028760/CsaV3_3G006860/CsaV3_4G024940
csv02010	ABC transporters	187311	22/4184	0.827693	0.999999	CsaV3_4G011860/CsaV3_2G009630/CsaV3_3G048950/CsaV3_6G052240/CsaV3_3G021800/CsaV3_5G026260/CsaV3_5G005630/CsaV3_5G037650/CsaV3_6G051320/CsaV3_5G037960/CsaV3_1G039760	CsaV3_4G011860/CsaV3_2G009630/CsaV3_3G048950/CsaV3_6G052240/CsaV3_3G021800/CsaV3_5G026260/CsaV3_5G005630/CsaV3_5G037650/CsaV3_6G051320/CsaV3_5G037960/CsaV3_1G039760	csv:101206409/csv:101209574/csv:101219304/csv:101209905/csv:101210136/csv:101219839/csv:101211598/csv:101206448/csv:101210649/csv:101212585/csv:101214695	11	7	CsaV3_4G011860/CsaV3_3G048950/CsaV3_6G052240/CsaV3_5G026260/CsaV3_5G005630/CsaV3_6G051320/CsaV3_5G037960	4	CsaV3_2G009630/CsaV3_3G021800/CsaV3_5G037650/CsaV3_1G039760
csv03420	Nucleotide excision repair	26/2412	50/4184	0.830882	0.999999	CsaV3_6G016510/CsaV3_3G046980/CsaV3_3G022110/CsaV3_3G049790/CsaV3_5G034230/CsaV3_5G005690/CsaV3_3G005270/CsaV3_6G014890/CsaV3_6G042870/CsaV3_5G035370/CsaV3_1G004160/CsaV3_6G038390/CsaV3_6G014300/CsaV3_3G003270/CsaV3_1G002970/CsaV3_3G037350/CsaV3_5G005370/CsaV3_5G008820/CsaV3_6G016240/CsaV3_6G012270/CsaV3_6G034260/CsaV3_UNG115920/CsaV3_1G041100/CsaV3_6G038660/CsaV3_3G038830/CsaV3_1G031640	CsaV3_6G016510/CsaV3_3G046980/CsaV3_3G022110/CsaV3_3G049790/CsaV3_5G034230/CsaV3_5G005690/CsaV3_3G005270/CsaV3_6G014890/CsaV3_6G042870/CsaV3_5G035370/CsaV3_1G004160/CsaV3_6G038390/CsaV3_6G014300/CsaV3_3G003270/CsaV3_1G002970/CsaV3_3G037350/CsaV3_5G005370/CsaV3_5G008820/CsaV3_6G016240/CsaV3_6G012270/CsaV3_6G034260/CsaV3_UNG115920/CsaV3_1G041100/CsaV3_6G038660/CsaV3_3G038830/CsaV3_1G031640	csv:101208473/csv:101220176/csv:101222280/csv:101210951/csv:101220491/csv:101209940/csv:101212518/csv:101208568/csv:101220754/csv:101205315/csv:101217645/csv:101218845/csv:101213447/csv:101204877/csv:101208545/csv:101203835/csv:101212151/csv:101213310/csv:101212319/csv:101212709/csv:101217230/csv:101221224/csv:101209538/csv:101204361/csv:101221438/csv:101219981	26	7	CsaV3_5G034230/CsaV3_5G005690/CsaV3_3G005270/CsaV3_3G003270/CsaV3_3G037350/CsaV3_3G038830/CsaV3_1G031640	19	CsaV3_6G016510/CsaV3_3G046980/CsaV3_3G022110/CsaV3_3G049790/CsaV3_6G014890/CsaV3_6G042870/CsaV3_5G035370/CsaV3_1G004160/CsaV3_6G038390/CsaV3_6G014300/CsaV3_1G002970/CsaV3_5G005370/CsaV3_5G008820/CsaV3_6G016240/CsaV3_6G012270/CsaV3_6G034260/CsaV3_UNG115920/CsaV3_1G041100/CsaV3_6G038660
csv00640	Propanoate metabolism	20/2412	39/4184	0.834371	0.999999	CsaV3_1G043650/CsaV3_6G000070/CsaV3_1G007500/CsaV3_1G037300/CsaV3_3G033630/CsaV3_3G010140/CsaV3_2G002430/CsaV3_3G020130/CsaV3_7G007110/CsaV3_3G015370/CsaV3_3G014830/CsaV3_4G008750/CsaV3_5G023610/CsaV3_2G034560/CsaV3_1G046130/CsaV3_6G007490/CsaV3_1G015480/CsaV3_6G041570/CsaV3_1G041530/CsaV3_4G025950	CsaV3_1G043650/CsaV3_6G000070/CsaV3_1G007500/CsaV3_1G037300/CsaV3_3G033630/CsaV3_3G010140/CsaV3_2G002430/CsaV3_3G020130/CsaV3_7G007110/CsaV3_3G015370/CsaV3_3G014830/CsaV3_4G008750/CsaV3_5G023610/CsaV3_2G034560/CsaV3_1G046130/CsaV3_6G007490/CsaV3_1G015480/CsaV3_6G041570/CsaV3_1G041530/CsaV3_4G025950	csv:101222552/csv:101207718/csv:101206269/csv:101210819/csv:101209181/csv:101221427/csv:101207231/csv:101203579/csv:101204924/csv:101222823/csv:101206829/csv:101222930/csv:101212380/csv:101220632/csv:101205111/csv:101205496/csv:101212707/csv:101205130/csv:101216174/csv:101210209	20	17	CsaV3_1G043650/CsaV3_6G000070/CsaV3_1G037300/CsaV3_3G033630/CsaV3_3G010140/CsaV3_2G002430/CsaV3_3G020130/CsaV3_7G007110/CsaV3_3G015370/CsaV3_3G014830/CsaV3_5G023610/CsaV3_2G034560/CsaV3_1G046130/CsaV3_1G015480/CsaV3_6G041570/CsaV3_1G041530/CsaV3_4G025950	3	CsaV3_1G007500/CsaV3_4G008750/CsaV3_6G007490
csv00940	Phenylpropanoid biosynthesis	73/2412	138/4184	0.891418	0.999999	CsaV3_1G031500/CsaV3_3G004000/CsaV3_2G018020/CsaV3_1G010780/CsaV3_1G013520/CsaV3_4G033920/CsaV3_4G023640/CsaV3_3G030410/CsaV3_3G004010/CsaV3_4G002290/CsaV3_4G008590/CsaV3_4G002310/CsaV3_6G039710/CsaV3_6G019040/CsaV3_6G043930/CsaV3_2G010460/CsaV3_1G037100/CsaV3_3G047080/CsaV3_3G043060/CsaV3_4G023610/CsaV3_5G037450/CsaV3_4G005430/CsaV3_4G036360/CsaV3_6G019010/CsaV3_1G007040/CsaV3_6G039680/CsaV3_2G0…	CsaV3_1G031500/CsaV3_3G004000/CsaV3_2G018020/CsaV3_1G010780/CsaV3_1G013520/CsaV3_4G033920/CsaV3_4G023640/CsaV3_3G030410/CsaV3_3G004010/CsaV3_4G002290/CsaV3_4G008590/CsaV3_4G002310/CsaV3_6G039710/CsaV3_6G019040/CsaV3_6G043930/CsaV3_2G010460/CsaV3_1G037100/CsaV3_3G047080/CsaV3_3G043060/CsaV3_4G023610/CsaV3_5G037450/CsaV3_4G005430/CsaV3_4G036360/CsaV3_6G019010/CsaV3_1G007040/CsaV3_6G039680/CsaV3_2G0…	csv:101218077/csv:101214675/csv:101205228/csv:101214168/csv:101220141/csv:101220587/csv:101211989/csv:101219578/csv:101214916/csv:101203846/csv:101204109/csv:101203846/csv:101218617/csv:101207371/csv:101206860/csv:101220742/csv:101214057/csv:101218982/csv:101223112/csv:101212717/csv:105435603/csv:101223204/csv:101211842/csv:101208108/csv:101218046/csv:101218382/csv:101206562/csv:101212957/csv:101…	73	29	CsaV3_1G031500/CsaV3_3G004000/CsaV3_2G018020/CsaV3_1G010780/CsaV3_4G033920/CsaV3_3G030410/CsaV3_3G004010/CsaV3_4G008590/CsaV3_2G010460/CsaV3_3G047080/CsaV3_4G023610/CsaV3_4G036360/CsaV3_2G018010/CsaV3_2G014160/CsaV3_3G032840/CsaV3_2G035150/CsaV3_7G008380/CsaV3_1G010960/CsaV3_3G015450/CsaV3_1G026620/CsaV3_1G009470/CsaV3_3G004020/CsaV3_5G030200/CsaV3_1G004550/CsaV3_6G039670/CsaV3_5G033660/CsaV3_1G0…	44	CsaV3_1G013520/CsaV3_4G023640/CsaV3_4G002290/CsaV3_4G002310/CsaV3_6G039710/CsaV3_6G019040/CsaV3_6G043930/CsaV3_1G037100/CsaV3_3G043060/CsaV3_5G037450/CsaV3_4G005430/CsaV3_6G019010/CsaV3_1G007040/CsaV3_6G039680/CsaV3_4G023590/CsaV3_3G018190/CsaV3_2G009070/CsaV3_6G039720/CsaV3_4G023630/CsaV3_3G040220/CsaV3_4G002300/CsaV3_3G032850/CsaV3_7G031610/CsaV3_6G039690/CsaV3_1G030610/CsaV3_3G032830/CsaV3_6G0…
csv03040	Spliceosome	84/2412	158/4184	0.893079	0.999999	CsaV3_4G024840/CsaV3_2G032030/CsaV3_4G021980/CsaV3_7G024760/CsaV3_1G004420/CsaV3_5G040300/CsaV3_UNG075590/CsaV3_3G031460/CsaV3_1G045340/CsaV3_6G040740/CsaV3_5G039780/CsaV3_2G004930/novel.554/CsaV3_2G011210/CsaV3_6G007610/CsaV3_2G002790/CsaV3_5G031610/CsaV3_6G036200/CsaV3_3G011750/CsaV3_7G006480/CsaV3_2G008750/CsaV3_1G017170/CsaV3_1G007610/CsaV3_3G004540/CsaV3_3G011740/CsaV3_1G033610/CsaV3_4G03722…	CsaV3_4G024840/CsaV3_2G032030/CsaV3_4G021980/CsaV3_7G024760/CsaV3_1G004420/CsaV3_5G040300/CsaV3_UNG075590/CsaV3_3G031460/CsaV3_1G045340/CsaV3_6G040740/CsaV3_5G039780/CsaV3_2G004930/-/CsaV3_2G011210/CsaV3_6G007610/CsaV3_2G002790/CsaV3_5G031610/CsaV3_6G036200/CsaV3_3G011750/CsaV3_7G006480/CsaV3_2G008750/CsaV3_1G017170/CsaV3_1G007610/CsaV3_3G004540/CsaV3_3G011740/CsaV3_1G033610/CsaV3_4G037220/CsaV3_…	csv:101215599/csv:101217346/csv:101219553/csv:101212307/csv:101222147/csv:101207335/csv:101221493/csv:101222664/csv:101205030/csv:101214972/csv:101222164/csv:101213744/csv:101206265/csv:101210094/csv:101203800/csv:101222939/csv:101214372/csv:101207521/csv:101204424/csv:101219227/csv:101203346/csv:101218920/csv:101208137/csv:101222113/csv:101204424/csv:101221953/csv:101222727/csv:101207569/csv:101…	84	44	CsaV3_4G021980/CsaV3_1G004420/CsaV3_5G040300/CsaV3_UNG075590/CsaV3_3G031460/CsaV3_1G045340/CsaV3_5G039780/CsaV3_2G004930/novel.554/CsaV3_5G031610/CsaV3_3G011750/CsaV3_7G006480/CsaV3_2G008750/CsaV3_3G004540/CsaV3_3G011740/CsaV3_1G033610/CsaV3_4G008320/CsaV3_2G017010/CsaV3_4G001320/CsaV3_3G014050/CsaV3_2G012590/CsaV3_7G027360/CsaV3_5G024370/CsaV3_1G014490/CsaV3_1G045350/CsaV3_5G031680/CsaV3_6G04040…	40	CsaV3_4G024840/CsaV3_2G032030/CsaV3_7G024760/CsaV3_6G040740/CsaV3_2G011210/CsaV3_6G007610/CsaV3_2G002790/CsaV3_6G036200/CsaV3_1G017170/CsaV3_1G007610/CsaV3_4G037220/CsaV3_4G030890/CsaV3_5G026450/CsaV3_4G029110/CsaV3_6G038910/CsaV3_3G007250/CsaV3_7G030160/CsaV3_7G021700/CsaV3_1G014600/CsaV3_2G009170/CsaV3_7G023900/CsaV3_1G036310/CsaV3_3G032260/CsaV3_1G014700/CsaV3_6G017140/CsaV3_3G014060/CsaV3_3G0…
csv01210	2-Oxocarboxylic acid metabolism	23/2412	47/4184	0.913056	0.999999	CsaV3_6G044190/CsaV3_5G031200/CsaV3_2G014210/CsaV3_5G031220/CsaV3_2G025820/CsaV3_7G033940/CsaV3_5G014440/CsaV3_3G021690/CsaV3_3G031010/CsaV3_6G047780/CsaV3_7G005980/CsaV3_2G024880/CsaV3_6G039730/CsaV3_7G032040/CsaV3_2G032340/CsaV3_5G024880/CsaV3_3G047470/CsaV3_5G020610/CsaV3_1G013270/CsaV3_4G001800/CsaV3_7G003590/CsaV3_1G044260/novel.202	CsaV3_6G044190/CsaV3_5G031200/CsaV3_2G014210/CsaV3_5G031220/CsaV3_2G025820/CsaV3_7G033940/CsaV3_5G014440/CsaV3_3G021690/CsaV3_3G031010/CsaV3_6G047780/CsaV3_7G005980/CsaV3_2G024880/CsaV3_6G039730/CsaV3_7G032040/CsaV3_2G032340/CsaV3_5G024880/CsaV3_3G047470/CsaV3_5G020610/CsaV3_1G013270/CsaV3_4G001800/CsaV3_7G003590/CsaV3_1G044260/-	csv:101223180/csv:101213570/csv:101213242/csv:101220645/csv:101214004/csv:101212146/csv:101206329/csv:101205698/csv:101207254/csv:101214612/csv:101213336/csv:101207914/csv:101219331/csv:101211809/csv:101213342/csv:101222001/csv:101213892/csv:101211294/csv:101217299/csv:101211790/csv:101221392/csv:101208212/csv:101210312	23	14	CsaV3_6G044190/CsaV3_5G031200/CsaV3_5G031220/CsaV3_2G025820/CsaV3_3G021690/CsaV3_3G031010/CsaV3_2G024880/CsaV3_2G032340/CsaV3_5G024880/CsaV3_3G047470/CsaV3_5G020610/CsaV3_4G001800/CsaV3_1G044260/novel.202	9	CsaV3_2G014210/CsaV3_7G033940/CsaV3_5G014440/CsaV3_6G047780/CsaV3_7G005980/CsaV3_6G039730/CsaV3_7G032040/CsaV3_1G013270/CsaV3_7G003590
csv00563	Glycosylphosphatidylinositol (GPI)-anchor biosynthesis	187219	18/4184	0.914655	0.999999	CsaV3_7G001350/CsaV3_3G046520/CsaV3_1G042370/CsaV3_5G027130/CsaV3_7G026000/CsaV3_3G010340/CsaV3_1G037410/CsaV3_4G022060	CsaV3_7G001350/CsaV3_3G046520/CsaV3_1G042370/CsaV3_5G027130/CsaV3_7G026000/CsaV3_3G010340/CsaV3_1G037410/CsaV3_4G022060	csv:101213770/csv:101218278/csv:101217614/csv:101221852/csv:101221913/csv:101204909/csv:101216463/csv:101216602	8	2	CsaV3_3G010340/CsaV3_4G022060	6	CsaV3_7G001350/CsaV3_3G046520/CsaV3_1G042370/CsaV3_5G027130/CsaV3_7G026000/CsaV3_1G037410
csv00290	Valine, leucine and isoleucine biosynthesis	187188	16/4184	0.9155	0.999999	CsaV3_2G025820/CsaV3_3G021690/CsaV3_7G005980/CsaV3_6G040240/CsaV3_4G001800/CsaV3_1G044260/CsaV3_6G040230	CsaV3_2G025820/CsaV3_3G021690/CsaV3_7G005980/CsaV3_6G040240/CsaV3_4G001800/CsaV3_1G044260/CsaV3_6G040230	csv:101214004/csv:101205698/csv:101213336/csv:101205909/csv:101211790/csv:101208212/csv:101205680	7	6	CsaV3_2G025820/CsaV3_3G021690/CsaV3_6G040240/CsaV3_4G001800/CsaV3_1G044260/CsaV3_6G040230	1	CsaV3_7G005980
csv00920	Sulfur metabolism	14/2412	30/4184	0.919518	0.999999	CsaV3_5G030130/CsaV3_6G001060/CsaV3_6G044100/CsaV3_6G000650/CsaV3_6G048960/CsaV3_6G047800/CsaV3_1G013880/novel.85/CsaV3_3G018980/CsaV3_1G039690/CsaV3_5G004200/CsaV3_1G010690/CsaV3_2G017890/CsaV3_7G018620	CsaV3_5G030130/CsaV3_6G001060/CsaV3_6G044100/CsaV3_6G000650/CsaV3_6G048960/CsaV3_6G047800/CsaV3_1G013880/-/CsaV3_3G018980/CsaV3_1G039690/CsaV3_5G004200/CsaV3_1G010690/CsaV3_2G017890/CsaV3_7G018620	csv:101216623/csv:101213660/csv:101204217/csv:101220896/csv:101220567/csv:101214370/csv:101214714/csv:101216358/csv:101220393/csv:101218750/csv:101205151/csv:101211864/csv:101214580/csv:101213467	14	11	CsaV3_5G030130/CsaV3_6G001060/CsaV3_6G000650/CsaV3_6G047800/CsaV3_1G013880/novel.85/CsaV3_1G039690/CsaV3_5G004200/CsaV3_1G010690/CsaV3_2G017890/CsaV3_7G018620	3	CsaV3_6G044100/CsaV3_6G048960/CsaV3_3G018980
csv00061	Fatty acid biosynthesis	16/2412	34/4184	0.922716	0.999999	CsaV3_1G030920/CsaV3_7G026160/CsaV3_1G032580/CsaV3_7G002420/CsaV3_1G012760/CsaV3_4G023750/CsaV3_3G026550/CsaV3_4G008750/CsaV3_6G015580/CsaV3_5G002040/CsaV3_5G023610/CsaV3_5G003990/CsaV3_1G042350/CsaV3_6G001070/CsaV3_4G004790/CsaV3_4G025950	CsaV3_1G030920/CsaV3_7G026160/CsaV3_1G032580/CsaV3_7G002420/CsaV3_1G012760/CsaV3_4G023750/CsaV3_3G026550/CsaV3_4G008750/CsaV3_6G015580/CsaV3_5G002040/CsaV3_5G023610/CsaV3_5G003990/CsaV3_1G042350/CsaV3_6G001070/CsaV3_4G004790/CsaV3_4G025950	csv:101210955/csv:101221530/csv:101210781/csv:101212158/csv:101215312/csv:101210519/csv:101222275/csv:101222930/csv:101220594/csv:101209130/csv:101212380/csv:101215700/csv:101217385/csv:101212704/csv:101207195/csv:101210209	16	9	CsaV3_7G026160/CsaV3_7G002420/CsaV3_1G012760/CsaV3_3G026550/CsaV3_5G023610/CsaV3_5G003990/CsaV3_1G042350/CsaV3_6G001070/CsaV3_4G025950	7	CsaV3_1G030920/CsaV3_1G032580/CsaV3_4G023750/CsaV3_4G008750/CsaV3_6G015580/CsaV3_5G002040/CsaV3_4G004790
csv04146	Peroxisome	37/2412	74/4184	0.927498	0.999999	CsaV3_6G031490/CsaV3_6G048870/CsaV3_6G039090/CsaV3_1G043170/CsaV3_3G028760/CsaV3_3G006080/CsaV3_6G051820/CsaV3_4G002910/CsaV3_1G001520/CsaV3_6G038810/CsaV3_7G002420/CsaV3_2G005140/CsaV3_3G033630/CsaV3_3G030870/CsaV3_1G042760/CsaV3_6G005940/CsaV3_3G026550/CsaV3_3G039850/CsaV3_4G010390/CsaV3_5G020610/CsaV3_5G002040/CsaV3_2G011380/CsaV3_1G004130/CsaV3_6G014940/CsaV3_4G013220/CsaV3_2G034560/CsaV3_4G0…	CsaV3_6G031490/CsaV3_6G048870/CsaV3_6G039090/CsaV3_1G043170/CsaV3_3G028760/CsaV3_3G006080/CsaV3_6G051820/CsaV3_4G002910/CsaV3_1G001520/CsaV3_6G038810/CsaV3_7G002420/CsaV3_2G005140/CsaV3_3G033630/CsaV3_3G030870/CsaV3_1G042760/CsaV3_6G005940/CsaV3_3G026550/CsaV3_3G039850/CsaV3_4G010390/CsaV3_5G020610/CsaV3_5G002040/CsaV3_2G011380/CsaV3_1G004130/CsaV3_6G014940/CsaV3_4G013220/CsaV3_2G034560/CsaV3_4G0…	csv:101216662/csv:101221512/csv:101207975/csv:101217893/csv:101208182/csv:101205134/csv:101215498/csv:101216694/csv:101207964/csv:101203798/csv:101212158/csv:101211331/csv:101209181/csv:101205684/csv:101211977/csv:101203578/csv:101222275/csv:101215097/csv:101218890/csv:101211294/csv:101209130/csv:101212301/csv:101216945/csv:101209297/csv:101222901/csv:101220632/csv:101222338/csv:101205111/csv:101…	37	29	CsaV3_6G031490/CsaV3_6G048870/CsaV3_6G039090/CsaV3_1G043170/CsaV3_3G006080/CsaV3_6G051820/CsaV3_4G002910/CsaV3_1G001520/CsaV3_6G038810/CsaV3_7G002420/CsaV3_3G033630/CsaV3_3G030870/CsaV3_1G042760/CsaV3_6G005940/CsaV3_3G026550/CsaV3_5G020610/CsaV3_2G011380/CsaV3_4G013220/CsaV3_2G034560/CsaV3_4G004420/CsaV3_1G046130/CsaV3_3G011240/CsaV3_4G036010/CsaV3_6G014400/CsaV3_6G050930/CsaV3_6G001070/CsaV3_6G0…	8	CsaV3_3G028760/CsaV3_2G005140/CsaV3_3G039850/CsaV3_4G010390/CsaV3_5G002040/CsaV3_1G004130/CsaV3_6G014940/CsaV3_3G047160
csv00650	Butanoate metabolism	187280	23/4184	0.943302	0.999999	CsaV3_1G005000/CsaV3_4G029010/CsaV3_5G020650/CsaV3_6G038810/CsaV3_3G003490/CsaV3_4G032320/CsaV3_4G007380/CsaV3_1G015480/CsaV3_1G044260/CsaV3_3G015070	CsaV3_1G005000/CsaV3_4G029010/CsaV3_5G020650/CsaV3_6G038810/CsaV3_3G003490/CsaV3_4G032320/CsaV3_4G007380/CsaV3_1G015480/CsaV3_1G044260/CsaV3_3G015070	csv:101210903/csv:101204963/csv:101216119/csv:101203798/csv:101208259/csv:101219660/csv:101220932/csv:101212707/csv:101208212/csv:101209903	10	8	CsaV3_1G005000/CsaV3_4G029010/CsaV3_6G038810/CsaV3_4G032320/CsaV3_4G007380/CsaV3_1G015480/CsaV3_1G044260/CsaV3_3G015070	2	CsaV3_5G020650/CsaV3_3G003490
csv00350	Tyrosine metabolism	17/2412	37/4184	0.945921	0.999999	CsaV3_4G008430/CsaV3_5G003790/CsaV3_5G003800/CsaV3_6G031750/CsaV3_4G000360/CsaV3_6G038140/CsaV3_7G024950/CsaV3_4G032000/CsaV3_7G024990/CsaV3_2G032340/CsaV3_6G015190/CsaV3_3G014840/CsaV3_3G047470/CsaV3_1G013270/CsaV3_6G038150/CsaV3_3G028450/CsaV3_6G048520	CsaV3_4G008430/CsaV3_5G003790/CsaV3_5G003800/CsaV3_6G031750/CsaV3_4G000360/CsaV3_6G038140/CsaV3_7G024950/CsaV3_4G032000/CsaV3_7G024990/CsaV3_2G032340/CsaV3_6G015190/CsaV3_3G014840/CsaV3_3G047470/CsaV3_1G013270/CsaV3_6G038150/CsaV3_3G028450/CsaV3_6G048520	csv:101206356/csv:101213059/csv:101212818/csv:101212881/csv:101212914/csv:101222232/csv:101209854/csv:101215051/csv:101206036/csv:101213342/csv:101221092/csv:101207065/csv:101213892/csv:101217299/csv:101222468/csv:101205061/csv:101206015	17	13	CsaV3_4G008430/CsaV3_5G003790/CsaV3_5G003800/CsaV3_7G024950/CsaV3_4G032000/CsaV3_7G024990/CsaV3_2G032340/CsaV3_6G015190/CsaV3_3G014840/CsaV3_3G047470/CsaV3_6G038150/CsaV3_3G028450/CsaV3_6G048520	4	CsaV3_6G031750/CsaV3_4G000360/CsaV3_6G038140/CsaV3_1G013270
csv00909	Sesquiterpenoid and triterpenoid biosynthesis	187188	17/4184	0.946909	0.999999	CsaV3_2G015210/CsaV3_3G003660/CsaV3_3G003650/CsaV3_3G005760/CsaV3_4G034210/CsaV3_4G035350/CsaV3_3G005740	CsaV3_2G015210/CsaV3_3G003660/CsaV3_3G003650/CsaV3_3G005760/CsaV3_4G034210/CsaV3_4G035350/CsaV3_3G005740	csv:101205767/csv:101202882/csv:101210313/csv:101211697/csv:101223178/csv:101204949/csv:101211540	7	2	CsaV3_3G005760/CsaV3_4G034210	5	CsaV3_2G015210/CsaV3_3G003660/CsaV3_3G003650/CsaV3_4G035350/CsaV3_3G005740
csv00740	Riboflavin metabolism	187127	14/4184	0.973066	0.999999	CsaV3_1G011810/CsaV3_6G000480/CsaV3_6G013000/CsaV3_6G012940/CsaV3_5G029010	CsaV3_1G011810/CsaV3_6G000480/CsaV3_6G013000/CsaV3_6G012940/CsaV3_5G029010	csv:101204867/csv:101202904/csv:105435790/csv:105435790/csv:101215305	5	4	CsaV3_1G011810/CsaV3_6G013000/CsaV3_6G012940/CsaV3_5G029010	1	CsaV3_6G000480
csv03020	RNA polymerase	18/2412	41/4184	0.97367	0.999999	CsaV3_5G031450/CsaV3_2G024260/CsaV3_4G004060/CsaV3_7G034640/CsaV3_3G046320/CsaV3_1G040840/CsaV3_3G032080/CsaV3_3G043380/CsaV3_3G004150/CsaV3_1G013120/novel.326/CsaV3_3G039630/CsaV3_6G048110/CsaV3_5G039120/CsaV3_3G000490/CsaV3_3G039160/CsaV3_3G017180/CsaV3_4G004830	CsaV3_5G031450/CsaV3_2G024260/CsaV3_4G004060/CsaV3_7G034640/CsaV3_3G046320/CsaV3_1G040840/CsaV3_3G032080/CsaV3_3G043380/CsaV3_3G004150/CsaV3_1G013120/-/CsaV3_3G039630/CsaV3_6G048110/CsaV3_5G039120/CsaV3_3G000490/CsaV3_3G039160/CsaV3_3G017180/CsaV3_4G004830	csv:101211391/csv:101217365/csv:101207602/csv:101221697/csv:101209100/csv:101209454/csv:101216683/csv:101207169/csv:101203505/csv:101216823/csv:101211228/csv:3429302/csv:101213971/csv:101213105/csv:101220606/csv:101205880/csv:101211588/csv:101207932	18	7	CsaV3_5G031450/CsaV3_4G004060/CsaV3_3G032080/CsaV3_1G013120/CsaV3_5G039120/CsaV3_3G000490/CsaV3_3G017180	11	CsaV3_2G024260/CsaV3_7G034640/CsaV3_3G046320/CsaV3_1G040840/CsaV3_3G043380/CsaV3_3G004150/novel.326/CsaV3_3G039630/CsaV3_6G048110/CsaV3_3G039160/CsaV3_4G004830
csv00904	Diterpenoid biosynthesis	187280	25/4184	0.976334	0.999999	CsaV3_5G005560/CsaV3_7G023060/CsaV3_3G001930/CsaV3_3G049410/CsaV3_4G033930/CsaV3_6G006520/CsaV3_1G011060/CsaV3_3G049420/CsaV3_5G015180/CsaV3_3G010170	CsaV3_5G005560/CsaV3_7G023060/CsaV3_3G001930/CsaV3_3G049410/CsaV3_4G033930/CsaV3_6G006520/CsaV3_1G011060/CsaV3_3G049420/CsaV3_5G015180/CsaV3_3G010170	csv:101212803/csv:101217426/csv:101208903/csv:101207275/csv:101209283/csv:101220640/csv:101220719/csv:105435043/csv:101220829/csv:101221667	10	5	CsaV3_3G001930/CsaV3_3G049410/CsaV3_4G033930/CsaV3_6G006520/CsaV3_3G010170	5	CsaV3_5G005560/CsaV3_7G023060/CsaV3_1G011060/CsaV3_3G049420/CsaV3_5G015180
csv00591	Linoleic acid metabolism	187250	24/4184	0.986077	0.999999	CsaV3_1G032150/CsaV3_2G006380/CsaV3_2G023210/CsaV3_5G030460/CsaV3_4G023930/CsaV3_4G023830/CsaV3_2G005350/CsaV3_2G006460/CsaV3_2G005370	CsaV3_1G032150/CsaV3_2G006380/CsaV3_2G023210/CsaV3_5G030460/CsaV3_4G023930/CsaV3_4G023830/CsaV3_2G005350/CsaV3_2G006460/CsaV3_2G005370	csv:101203184/csv:101207406/csv:101207406/csv:101209343/csv:101209041/csv:101216079/csv:101208141/csv:101206327/csv:101207901	9	2	CsaV3_5G030460/CsaV3_4G023930	7	CsaV3_1G032150/CsaV3_2G006380/CsaV3_2G023210/CsaV3_4G023830/CsaV3_2G005350/CsaV3_2G006460/CsaV3_2G005370
csv00040	Pentose and glucuronate interconversions	39/2412	84/4184	0.986131	0.999999	CsaV3_5G028290/CsaV3_3G016710/CsaV3_7G033930/CsaV3_4G008770/CsaV3_1G043310/CsaV3_3G006470/CsaV3_1G039880/CsaV3_5G035910/CsaV3_3G021110/CsaV3_7G029590/CsaV3_4G024600/CsaV3_5G038240/CsaV3_3G033310/CsaV3_1G005660/CsaV3_4G025300/CsaV3_5G018590/CsaV3_7G032560/CsaV3_5G031360/CsaV3_1G041370/CsaV3_3G016700/CsaV3_5G035040/CsaV3_1G043300/CsaV3_6G032490/CsaV3_2G008080/CsaV3_4G025340/CsaV3_7G027310/CsaV3_3G0…	CsaV3_5G028290/CsaV3_3G016710/CsaV3_7G033930/CsaV3_4G008770/CsaV3_1G043310/CsaV3_3G006470/CsaV3_1G039880/CsaV3_5G035910/CsaV3_3G021110/CsaV3_7G029590/CsaV3_4G024600/CsaV3_5G038240/CsaV3_3G033310/CsaV3_1G005660/CsaV3_4G025300/CsaV3_5G018590/CsaV3_7G032560/CsaV3_5G031360/CsaV3_1G041370/CsaV3_3G016700/CsaV3_5G035040/CsaV3_1G043300/CsaV3_6G032490/CsaV3_2G008080/CsaV3_4G025340/CsaV3_7G027310/CsaV3_3G0…	csv:101219120/csv:101221690/csv:101212388/csv:101222306/csv:101219793/csv:101207212/csv:101215894/csv:101205739/csv:101220298/csv:101205321/csv:101219724/csv:101221923/csv:101204929/csv:101219871/csv:101210436/csv:101220540/csv:101205645/csv:101212122/csv:101214012/csv:101221918/csv:101206112/csv:101219551/csv:101203157/csv:101209640/csv:101209692/csv:101204079/csv:101207185/csv:101214883/csv:101…	39	22	CsaV3_5G028290/CsaV3_3G016710/CsaV3_1G043310/CsaV3_3G006470/CsaV3_3G021110/CsaV3_7G029590/CsaV3_4G024600/CsaV3_5G038240/CsaV3_3G033310/CsaV3_1G005660/CsaV3_4G025300/CsaV3_3G016700/CsaV3_1G043300/CsaV3_2G008080/CsaV3_4G025340/CsaV3_7G027310/CsaV3_3G042590/CsaV3_4G005340/CsaV3_7G029580/CsaV3_2G015180/CsaV3_3G028700/CsaV3_1G009070	17	CsaV3_7G033930/CsaV3_4G008770/CsaV3_1G039880/CsaV3_5G035910/CsaV3_5G018590/CsaV3_7G032560/CsaV3_5G031360/CsaV3_1G041370/CsaV3_5G035040/CsaV3_6G032490/CsaV3_3G000050/CsaV3_2G024360/CsaV3_7G026220/CsaV3_2G012050/CsaV3_6G033570/CsaV3_4G025310/CsaV3_3G016190
csv03022	Basal transcription factors	14/2412	35/4184	0.988697	0.999999	CsaV3_3G028740/CsaV3_7G003000/CsaV3_6G037540/CsaV3_7G029840/CsaV3_2G033350/CsaV3_6G042870/CsaV3_1G004160/CsaV3_3G003270/CsaV3_2G033370/CsaV3_5G025800/CsaV3_5G005370/CsaV3_6G039860/CsaV3_7G026510/CsaV3_3G003450	CsaV3_3G028740/CsaV3_7G003000/CsaV3_6G037540/CsaV3_7G029840/CsaV3_2G033350/CsaV3_6G042870/CsaV3_1G004160/CsaV3_3G003270/CsaV3_2G033370/CsaV3_5G025800/CsaV3_5G005370/CsaV3_6G039860/CsaV3_7G026510/CsaV3_3G003450	csv:101207693/csv:101208326/csv:101206514/csv:101223096/csv:101220187/csv:101220754/csv:101217645/csv:101204877/csv:101219951/csv:101212641/csv:101212151/csv:101222808/csv:101212178/csv:101207528	14	7	CsaV3_3G028740/CsaV3_7G003000/CsaV3_6G037540/CsaV3_7G029840/CsaV3_3G003270/CsaV3_5G025800/CsaV3_7G026510	7	CsaV3_2G033350/CsaV3_6G042870/CsaV3_1G004160/CsaV3_2G033370/CsaV3_5G005370/CsaV3_6G039860/CsaV3_3G003450
csv00970	Aminoacyl-tRNA biosynthesis	21/2412	51/4184	0.994158	0.999999	CsaV3_6G052840/CsaV3_5G005900/CsaV3_4G003400/CsaV3_6G012710/CsaV3_3G046850/CsaV3_2G033230/CsaV3_1G003150/CsaV3_5G013970/CsaV3_5G002780/CsaV3_1G012830/CsaV3_1G039910/CsaV3_3G014640/CsaV3_UNG110800/CsaV3_5G014480/CsaV3_2G012390/CsaV3_2G012380/CsaV3_6G008710/CsaV3_1G039630/CsaV3_3G047640/CsaV3_4G017540/CsaV3_2G008510	CsaV3_6G052840/CsaV3_5G005900/CsaV3_4G003400/CsaV3_6G012710/CsaV3_3G046850/CsaV3_2G033230/CsaV3_1G003150/CsaV3_5G013970/CsaV3_5G002780/CsaV3_1G012830/CsaV3_1G039910/CsaV3_3G014640/CsaV3_UNG110800/CsaV3_5G014480/CsaV3_2G012390/CsaV3_2G012380/CsaV3_6G008710/CsaV3_1G039630/CsaV3_3G047640/CsaV3_4G017540/CsaV3_2G008510	csv:101205162/csv:101207248/csv:101211125/csv:101206513/csv:101222217/csv:101221612/csv:101210257/csv:101203909/csv:101218148/csv:101213618/csv:101222059/csv:101211723/csv:101220233/csv:101203149/csv:101209226/csv:101209226/csv:101209684/csv:101217798/csv:101207397/csv:101217460/csv:101204394	21	11	CsaV3_6G052840/CsaV3_6G012710/CsaV3_1G012830/CsaV3_1G039910/CsaV3_UNG110800/CsaV3_5G014480/CsaV3_2G012390/CsaV3_2G012380/CsaV3_6G008710/CsaV3_1G039630/CsaV3_4G017540	10	CsaV3_5G005900/CsaV3_4G003400/CsaV3_3G046850/CsaV3_2G033230/CsaV3_1G003150/CsaV3_5G013970/CsaV3_5G002780/CsaV3_3G014640/CsaV3_3G047640/CsaV3_2G008510
csv00450	Selenocompound metabolism	187097	17/4184	0.999116	0.999999	CsaV3_3G040500/CsaV3_3G043020/CsaV3_6G031510/CsaV3_3G000880	CsaV3_3G040500/CsaV3_3G043020/CsaV3_6G031510/CsaV3_3G000880	csv:101203129/csv:101222636/csv:101216175/csv:101214172	4	2	CsaV3_6G031510/CsaV3_3G000880	2	CsaV3_3G040500/CsaV3_3G043020
[truncated: 1 more rows]

## Sheet: XS_40vsCS_40 DAPP KEGG
KEGGID	Description	GeneRatio	BgRatio	pvalue	padj	geneID	geneName	keggID	Count	Up	Up_Gene_names	Down	Down_Gene_names			KEGGID	Description	GeneRatio	BgRatio	pvalue	padj	geneID	geneName	keggID	Count	Up	Up_Gene_names	Down	Down_Gene_names			KEGGID	Description	GeneRatio	BgRatio	pvalue	padj	geneID	geneName	keggID	Count	Up	Up_Gene_names	Down	Down_Gene_names			KEGGID	Description
[truncated: 114 more rows]
[truncated: 4,376 more columns]

## Sheet: XS_vsCS _Common KEGG
KEGGID	Description	GeneRatio	BgRatio	pvalue	padj	geneID	geneName	keggID	Count
csv00511	Other glycan degradation	4/234	16/3919	0.0127511	0.565223	CsaV3_2G011410/CsaV3_5G001420/CsaV3_5G039980/CsaV3_6G047280	CsaV3_2G011410/CsaV3_5G001420/CsaV3_5G039980/CsaV3_6G047280	csv:101213022/csv:101211186/csv:101204709/csv:101221354	4
csv00073	Cutin, suberine and wax biosynthesis	5/234	25/3919	0.0144382	0.565223	CsaV3_1G030900/CsaV3_1G036060/CsaV3_3G010300/CsaV3_3G031760/CsaV3_6G006560	CsaV3_1G030900/CsaV3_1G036060/CsaV3_3G010300/CsaV3_3G031760/CsaV3_6G006560	csv:101212905/csv:101214516/csv:101203441/csv:101222831/csv:101222843	5
csv00910	Nitrogen metabolism	6/234	40/3919	0.029539	0.565223	CsaV3_2G026770/CsaV3_2G026780/CsaV3_3G018610/CsaV3_3G027930/CsaV3_3G042440/CsaV3_5G023360	CsaV3_2G026770/CsaV3_2G026780/CsaV3_3G018610/CsaV3_3G027930/CsaV3_3G042440/CsaV3_5G023360	csv:101219000/csv:101219000/csv:101217505/csv:101213224/csv:101213998/csv:101219000	6
csv00130	Ubiquinone and other terpenoid-quinone biosynthesis	6/234	43/3919	0.0404762	0.565223	CsaV3_1G031500/CsaV3_2G008500/CsaV3_2G009070/CsaV3_3G005530/CsaV3_3G030410/CsaV3_6G015650	CsaV3_1G031500/CsaV3_2G008500/CsaV3_2G009070/CsaV3_3G005530/CsaV3_3G030410/CsaV3_6G015650	csv:101218077/csv:101221791/csv:101205537/csv:101209481/csv:101219578/csv:101220123	6
[truncated: 86 more rows]

## Sheet: XN_10vsCN_10DAPP KEGG
KEGGID	Description	GeneRatio	BgRatio	pvalue	padj	geneID	geneName	keggID	Count	Up	Up_Gene_names	Down	Down_Gene_names
[truncated: 91 more rows]

[truncated: 4 more sheets: XN_20vsCN_20DAP KEGG, XN_30vsCN_30DAP KEGG, XN_40vsCS_40DAPP KEGG, XN_vs_CN common KEGG]
