# Supplementary material for: Transcriptomic and Physiological Analyses Reveal Potential Genes Involved in Photoperiod-Regulated β-Carotene Accumulation Mechanisms in the Endocarp of Cucumber (Cucumis sativus L.) Fruit
Source: Int J Mol Sci. 2022 Oct 21;23(20):12650. doi: 10.3390/ijms232012650 (PMC9604348; doi:10.3390/ijms232012650)
Supplement: Supplementary file 1 [file ijms-23-12650-s001.zip › Supplementary Datasheet S6_ DEGs related to carotenoid metabolism, chlorophyll metabolism, Photosynthesis , light and circadian signaling.xlsx]

## Sheet: Carotenoid Related genes
	XS10	XS20	XS30	XS40	XN10	XN20	XN30	XN40		CS10	CS20	CS30	CS40	CN10	CN20	CN30	CN40	Gene Annotations
Gene ID			FPKM										FPKM
CsaV3_4G003370	146.676	26.2208	110.858	248.703	41.1737	61.4423	160.88	287.135		43.259	68.368	81.4246	50.4382	53.7941	30.5152	87.3042	240.5	15-cis-zeta-carotene isomerase
CsaV3_4G007760	33.5088	36.2107	77.6663	73.5039	65.497	12.4792	190.899	215.416		16.5146	46.4003	20.4863	31.1869	43.1462	42.2889	77.4741	51.5385	9-cis-epoxycarotenoid dioxygenase
CsaV3_6G051790	153.852	1.53393	148.608	1856.55	429.765	270.126	1732.87	1612.34		1.71148	31.8553	3.12226	6.67153	16.5777	13.6009	177.573	423.088	9-cis-epoxycarotenoid dioxygenase
CsaV3_4G007180	8.05964	0.888745	2.47696	4.68935	8.99037	14.5443	7.90051	8.01031		19.8943	20.8768	19.6315	11.8493	23.4026	14.269	38.5999	233.699	9-cis-epoxycarotenoid dioxygenase, putative
CsaV3_2G026690	0	0.553652	0.262909	0.399331	1.16495	1.06302	1.035	0.495785		0.280943	1.02242	0.0331181	0.767107	0.726059	0.653934	0.526133	0.119484	Abscisic acid 8'-hydroxylase
CsaV3_2G027780	1.31763	1.61966	1.11897	0.50219	1.74779	3.53055	2.89178	1.10384		0	0	0	2.67909	0	0	0.22674	0	Abscisic acid 8'-hydroxylase
CsaV3_4G034320	4.60974	10.2045	12.534	5.99485	22.7337	4.62304	13.6509	12.6533		4.67918	2.53627	1.57278	7.96474	2.73681	7.90415	4.97123	14.3143	Abscisic acid 8'-hydroxylase
CsaV3_7G008610	3.04745	3.9807	0.616656	0.112601	2.03705	0.181698	0.274736	0.167203		1.45394	0.537035	0.806289	1.57642	0.201265	0.32855	1.90805	0.200855	Abscisic acid 8'-hydroxylase
CsaV3_4G007140	745.186	62.4237	208.396	554.417	412.559	648.977	431.384	358.701		416.302	336.084	86.3847	250.871	291.788	420.446	232.832	396.13	Abscisic acid 8'-hydroxylase
CsaV3_1G034470	4.31796	7.63644	2.71147	11.4121	2.54007	2.73191	2.27096	3.08538		0.469425	1.2466	3.1722	1.98056	0.376763	1.6417	1.10757	1.36802	abscisic acid 8'-hydroxylase 2
CsaV3_4G017450	21.2208	12.5022	27.3303	35.6023	38.1583	57.4093	49.632	38.984		38.5013	23.9459	5.62794	31.6559	33.5153	34.6865	44.7091	34.7154	Aldehyde oxidase, putative
CsaV3_5G002520	10.6941	8.0425	15.5613	13.055	17.3447	14.9439	19.7553	16.916		4.67566	9.47277	15.9546	15.768	1.87632	3.48861	18.773	19.7905	Beta-carotene hydroxylase
CsaV3_3G017450	31.893	26.7893	275.872	1129.62	119.95	117.277	719.053	1318.51		27.632	131.771	24.3028	25.7594	98.4209	37.7226	159.379	482.553	Beta-carotene hydroxylase
CsaV3_2G013780	2.06123	1.05428	1.98877	2.03788	0.569134	1.02518	1.26909	1.01065		1.26684	0.730032	0.999592	1.46596	0.447077	0.452887	0.693551	0.92035	beta-carotene isomerase D27, chloroplastic-like
CsaV3_6G008730	2.06669	3.75536	4.71032	1.1617	4.01397	2.09945	2.49843	0.893044		0.281668	1.68897	0.586197	2.84029	0.676495	2.10852	4.22154	0.940839	Carotenoid cleavage dioxygenase
CsaV3_2G030870	0.00837904	0.165313	0.145108	0.10568	0.0682427	0.0282123	0.347026	0.234867		0.229634	0.131459	0.041579	0.0823709	0	0.00710101	0.7619	3.24143	Carotenoid cleavage dioxygenase
CsaV3_6G040180	5.55462	13.3268	11.2408	21.1452	16.9906	7.3049	7.57912	10.9853		11.8604	6.6968	10.8438	15.8776	9.7916	14.2943	15.0401	9.49715	Cytochrome P450
CsaV3_3G007050	17.3354	11.7104	20.4061	17.0305	33.694	16.8115	14.2733	13.366		21.0341	18.8544	7.81186	15.2104	31.7889	31.6413	15.2034	23.3619	Cytochrome P450, putative
CsaV3_4G022080	36.7149	21.8182	33.3419	51.2625	19.9037	18.8787	39.3951	50.6187		14.5488	12.143	10.0169	13.3036	15.8974	9.98979	29.1542	38.7451	Lycopene beta cyclase
CsaV3_4G000740	12.8469	2.22292	10.578	21.9782	4.90159	3.78124	9.04821	13.926		7.99439	3.72288	2.91779	8.37145	6.05319	8.11893	16.578	25.6277	Lycopene beta-cyclase
CsaV3_2G001370	2.75399	3.31415	2.05466	0.351482	0.89662	0.63972	0.719141	0.504934		2.42722	1.7703	3.00868	3.48741	1.38463	1.80673	1.19912	0.667441	Lycopene epsilon cyclase
CsaV3_4G002690	35.0242	34.6329	39.2485	95.0352	25.3533	35.0468	64.548	103.462		31.3957	24.3867	26.9236	23.3076	19.4381	20.5253	37.9124	72.9083	Phytoene desaturase
CsaV3_5G020340	163.605	64.4654	275.439	365.195	99.0946	95.0203	256.84	490.748		56.5473	126.668	46.5549	57.8213	94.7851	105.131	192.233	413.191	Phytoene synthase
CsaV3_4G023380	13.4869	45.7107	16.6755	19.7252	14.8627	24.7369	14.3424	8.64591		4.63158	11.1475	2.02241	4.75723	38.6542	10.4163	14.9862	17.8222	Phytoene synthase
CsaV3_4G007560	14.0353	48.8079	31.5899	6.43529	18.6013	22.6321	11.3947	5.36887		16.8705	15.168	17.6105	17.8891	14.5561	17.8806	24.8379	14.6097	Phytoene synthase
CsaV3_5G024720	1.04492	18.8773	19.1028	52.3423	30.9559	31.5755	21.7944	32.2813		17.6564	24.9969	7.92027	16.5448	28.5058	24.5863	11.2731	38.7241	xanthoxin dehydrogenase
CsaV3_2G016630	90.7955	38.2245	202.387	152.301	24.8538	37.014	109.227	145.965		29.0115	33.3306	12.1264	18.9645	37.8261	25.8927	133.722	229.843	Zeaxanthin epoxidase, chloroplastic
CsaV3_1G045650	133.358	81.4101	137.592	294.935	76.6605	102.05	230.305	358.293		60.7311	57.8786	32.8954	44.8278	55.4826	41.1526	109.994	161.747	Zeta-carotene desaturase
CsaV3_3G046470	0.888475	1.63866	7.03535	3.75783	0.782976	1.56888	4.16709	3.09347		3.03866	1.64562	0.874778	2.37216	1.73735	2.26655	6.01173	4.90804	Ore

## Sheet: Chlorophyll metabolism genes
	XS10	XS20	XS30	XS40	XN10	XN20	XN30	XN40		CS10	CS20	CS30	CS40	CN10	CN20	CN30	CN40	Annotations
Gne ID		Log10 (FPKM)										Log10 (FPKM)
CsaV3_4G026340	1.0492	1.05961	0.938606	0.759976	0.882719	0.905531	0.823874	0.801982		1.10188	0.983047	0.844712	1.28744	0.967249	0.964474	0.898827	0.971532	Chlorophyll synthase
CsaV3_5G025230	0.676695	-1.16008	-1.00533	-1.0179	-0.396505	-0.550697	-1.31215	-1.66553		-0.544034	0.518253	-0.54458	0.475209	1.29322	-1.25725	-1.35494	-0.969338	chlorophyllase-1-like
CsaV3_2G013440	1.54164	1.70243	1.70866	1.73081	1.29796	1.46779	1.56686	1.69105		1.50034	1.44445	1.31121	1.43584	1.42261	1.40244	1.48517	1.90197	chlorophyllase-2, chloroplastic
CsaV3_6G034450	0.874155	1.24493	0.972707	1.31295	1.26505	1.06259	1.29742	1.37961		0.960709	0.795503	1.13988	1.03745	1.27101	0.533844	1.01981	0.432001	chlorophyllide a oxygenase, chloroplastic
CsaV3_3G011480	0.84924	0.49958	0.885854	0.692029	0.856171	0.715682	0.821877	0.724907		0.701941	0.617409	0.118196	0.574041	0.765421	0.655893	0.941776	0.567411	coenzyme F420 hydrogenase family / dehydrogenase, beta subunit family
CsaV3_3G014130	0.721676	0.792315	0.995975	0.977584	0.796369	0.869295	0.835401	0.98586		0.990499	0.708313	0.915122	0.942257	0.838756	0.814116	0.83524	1.01374	Divinyl chlorophyllide a 8-vinyl-reductase, chloroplastic
CsaV3_2G025670	1.82142	1.68821	1.27718	1.45897	1.82586	1.74327	1.51039	1.65023		1.73647	2.21059	2.01312	1.89871	2.05123	2.08102	1.66427	1.29177	Ferrochelatase
CsaV3_4G017400	0.577192	0.656914	0.638186	0.679954	0.6701	0.829971	0.53592	0.620944		0.839071	0.776546	1.05164	0.613326	0.526469	0.675257	0.681166	0.549854	Geranylgeranyl reductase
CsaV3_1G002370	1.1586	1.46307	1.85012	1.60928	1.53424	1.20025	1.45995	1.56971		1.66845	1.30183	1.36665	1.44128	1.36253	1.35855	1.70008	1.39486	Geranylgeranyl reductase
CsaV3_7G007260	1.6903	1.70101	1.6312	1.78502	1.56719	1.65637	1.60316	1.76307		1.84282	1.73074	1.78812	1.63476	1.69518	1.68342	1.52081	1.68644	glutamate-1-semialdehyde 2,1-aminomutase 2
CsaV3_2G030530	0.964276	1.44566	1.49952	1.19384	1.36782	1.02286	1.20049	1.26846		1.44602	0.713035	0.717688	1.08999	1.28384	1.25905	1.26334	1.05464	Glutamyl-tRNA reductase
CsaV3_7G007370	1.58621	0.555193	0.39752	0.384598	1.04434	0.908638	0.558971	0.581281		1.02492	1.30923	0.830822	0.629522	-0.0948095	1.68997	0.831763	0.449966	Glutamyl-tRNA reductase
CsaV3_1G030090	1.31647	0.954159	1.0213	1.26778	1.63318	1.281	1.37278	1.42704		0.82003	1.1573	0.932205	1.02435	0.826993	1.07256	1.27705	1.25884	Heme oxygenase 1
CsaV3_4G011730	1.06505	1.40964	0.982974	1.19188	1.15871	1.00421	0.900687	1.18403		1.09729	0.54338	1.05189	1.15295	1.0018	0.702269	1.048	0.244258	Magnesium-chelatase subunit H
CsaV3_1G000080	1.15558	0.957713	1.28818	0.744755	1.21126	1.10376	1.10746	0.927329		1.21819	1.28181	0.687914	1.37625	0.445718	1.23966	1.29119	1.03241	magnesium-protoporphyrin IX methyltransferase
CsaV3_4G031720	1.79951	1.45044	2.08548	1.56857	1.39052	1.20963	1.38932	1.47674		1.6057	0.89992	1.03245	1.24317	1.26055	1.47462	1.76822	1.44023	Magnesium-protoporphyrin IX monomethyl ester [oxidative] cyclase
CsaV3_6G050640	1.16018	0.968018	1.18204	0.981	0.836928	0.882757	0.939219	0.99306		1.04921	0.853655	0.793028	1.08181	1.01756	0.94784	0.959754	0.924026	Mg-protoporphyrin IX chelatase
CsaV3_6G039120	0	1.08032	0.899756	0.901926	1.14606	0.99515	0.979445	0.985649		1.13082	0.996592	0.983135	1.06117	1.11614	0.98846	0.881989	0.93038	Mg-protoporphyrin IX chelatase
CsaV3_4G033870	2.15632	2.12571	2.29982	1.92307	1.67968	1.68902	1.62645	1.70224		2.02697	1.35488	1.50948	1.70055	1.86611	1.85489	1.9137	1.61926	NADPH-protochlorophyllide oxidoreductase
CsaV3_4G007220	1.66865	1.47203	1.52072	1.50418	1.39925	1.34734	1.45655	1.53575		1.79634	1.41107	1.44382	1.38779	1.43462	1.41935	1.49293	1.47492	Oxygen-dependent coproporphyrinogen-III oxidase
CsaV3_1G014120	1.22215	1.42001	1.2798	1.51041	1.5118	1.49156	1.60847	1.72229		1.12229	1.38462	1.32462	1.42548	1.22244	1.23961	1.43396	1.41028	Pheophorbide a oxygenase
CsaV3_1G043160	0.777559	0.555678	0.409637	0.0800525	0.356407	0.258998	0.160249	0.00534649		0.306514	0.277875	0.286527	0.549786	0.450794	0.347136	0.35526	0.0435421	Phycoerythrobilin ferredoxin oxidoreductase
CsaV3_3G031800	1.32136	1.2243	1.5411	1.56429	1.09215	1.17193	1.37329	1.59961		1.26419	1.17499	1.18374	1.1163	1.2105	1.09547	1.36331	1.41769	Porphobilinogen deaminase
CsaV3_6G031220	0.0463081	-0.637539	-0.469371	-1.17255	0.616009	-0.937479	-0.666946	0		0.118636	0.0858744	-0.33181	0.205714	0.397565	-0.0894358	-0.610045	-1.25706	protein STAY-GREEN LIKE, chloroplastic
CsaV3_5G003370	1.31175	1.93597	2.02438	2.18963	2.0764	1.9655	2.17163	2.20737		1.29326	1.90426	1.78872	1.81028	1.80144	1.69279	2.01017	2.13899	protein STAY-GREEN, chloroplastic-like
CsaV3_6G001080	0.784684	0.658015	0.825457	0.682181	0.69222	0.830928	0.71508	0.833167		0.949554	0.775066	0.85424	0.923417	0.899075	0.734572	0.851602	0.763793	Protoporphyrinogen oxidase
CsaV3_5G018640	1.2018	1.34578	1.32307	1.51293	1.17303	1.24457	1.44775	1.56927		1.43033	1.21347	1.27017	1.32641	1.29844	1.22996	1.31875	1.45578	Protoporphyrinogen oxidase
CsaV3_1G024260	2.18023	1.75367	1.78985	2.01794	2.49139	2.10675	2.12044	2.18286		1.52705	1.84568	1.77452	1.80677	1.65863	1.7274	1.93038	1.96342	Reductase
CsaV3_7G031380	0.841219	1.30182	0.46656	0.558062	0.944164	0.649894	0.543834	0.456547		1.20301	1.46104	1.12558	1.03131	0.681905	0.740476	0.532328	0.606334	Siroheme synthase
CsaV3_4G008050	1.14981	1.15283	1.10088	1.06372	1.1558	1.0713	1.11038	1.14306		1.07338	1.01908	0.840944	1.05877	1.05106	0.988447	1.07926	1.0223	Uroporphyrinogen decarboxylase
CsaV3_2G028140	0.971806	1.31498	0.985472	1.21993	1.25838	1.31925	1.27684	1.23198		1.1268	1.13457	1.18578	1.1479	1.15316	1.0153	1.02306	0.960001	Uroporphyrinogen-III synthase

## Sheet: Light and circadian signals
	XS10	XS20	XS30	XS40	XN10	XN20	XN30	XN40		CS10	CS20	CS30	CS40	CN10	CN20	CN30	CN40	Gene annotation
Gene Id		LOG10 (FPKM)												LOG10 (FPKM)
CSaV3_3G047490(CRY)	85.3827	105.107	113.772	88.1709	210.4	154.367	170.083	133.156		91.4391	100.858	49.3074	160.529	98.9359	85.6452	133.528	74.2229	CRYPTOCHROME
CsaV3_7G002530(PHY)	1.45859	3.19695	2.39447	3.80753	6.90468	6.28335	2.35588	1.44935		1.85535	5.44281	4.15373	2.13586	5.10581	4.71388	2.78904	3.45276	Phytochrome
CsaV3_1G005380(PKS1)	1.43079	0.442546	2.56362	2.11202	3.69056	3.29286	4.27896	2.46746		0.785809	1.27794	0.387998	2.05431	0.529048	0.652088	2.65361	0.299391	protein PHYTOCHROME KINASE SUBSTRATE 1-like
CsaV3_3G039500(PKS4)	17.7806	25.6306	12.7166	6.64535	24.1683	11.1204	6.74584	4.07428		36.0878	17.9194	12.824	13.3245	10.6016	17.3869	15.7031	15.4475	protein PHYTOCHROME KINASE SUBSTRATE 4
CsaV3_3G015190(PHYB)	16.8326	30.5651	34.66	20.432	23.1862	18.5739	26.2993	25.7987		18.2973	14.6827	10.7885	17.9422	17.9995	20.4679	29.5808	26.54	Phytochrome
CsaV3_7G002530(PHYC)	1.45859	3.19695	2.39447	3.80753	6.90468	6.28335	2.35588	1.44935		1.85535	5.44281	4.15373	2.13586	5.10581	4.71388	2.78904	3.45276	Phytochrome
CsaV3_5G002170(LPKS1)	0	0.0125519	0.0240872	0.0364154	0.0841908	0.186171	0.0420951	0.0909669		0.0239667	0.0536855	0.0168593	0	0.0376789	0.0839871	0.0458121	0.0164533	Protein kinase family protein
CsaV3_3G027830(Chalcone)	5.58726	25.0523	4.12616	0.544496	0.97856	12.3295	6.66657	0.232795		13.0064	1.52774	2.01982	6.54553	2.26277	2.3742	2.61608	0.962458	Chalcone synthase
CsaV3_1G045940(E3_COP1-L)	4.54546	12.5834	6.03224	8.72242	5.92002	9.27828	7.8212	9.07452		9.32123	15.0799	15.5678	9.67549	13.8563	9.92114	6.33065	8.54839	E3 ubiquitin-protein ligase COP1-like
CsaV3_5G014370(Flavin binding)	28.692	25.1885	50.8176	41.4929	5.40708	27.6375	20.786	10.1935		38.0529	28.2884	23.3789	27.3967	37.0661	26.4809	28.6989	48.2646	Flavin-binding kelch domain F box protein
CsaV3_1G044210(FL_T)	4.75901	0.402061	0.491613	0.7795	17.221	10.235	4.46928	0.978112		0.90913	6.62903	4.69056	4.59819	10.9612	7.82849	1.32375	10.1845	Flowering locus T protein
CsaV3_7G034990(EF3)	7.55769	11.5208	5.00783	8.93806	16.2589	11.9953	8.59169	9.22364		4.58515	9.57386	9.73897	8.63145	8.05882	6.41931	4.19782	3.3191	protein EARLY FLOWERING 3
CsaV3_2G025750(EF3)	64.0462	18.41	65.0475	45.8758	42.1019	41.1787	58.9597	58.6871		31.3873	41.9288	17.3484	46.7554	64.6405	47.4576	75.7279	65.9973	protein EARLY FLOWERING 3
CsaV3_7G024490(GIGANTEA)	65.8411	73.1861	118.387	34.8677	23.671	42.2297	31.8146	27.5688		31.1543	16.5169	9.27852	15.6899	38.5438	33.3697	45.3383	31.8877	Protein gigantea
CsaV3_6G005020(GIGANTEA)	37.7895	182.966	163.893	84.2259	84.0405	139.788	69.6792	15.4643		155.736	184.514	145.744	196.648	208.036	197.488	127.212	123.009	protein GIGANTEA-like
CsaV3_6G008360(LHY_Like)	79.2717	29.5752	17.1721	166.365	194.642	123.22	154.862	176.524		43.1948	10.2088	9.51655	17.3301	10.241	15.0988	98.2128	12.8105	protein LHY-like isoform X2
CsaV3_3G046530(HY5)	3.77286	2.88425	7.79462	4.86124	16.4754	2.68636	3.19294	3.24878		2.38054	4.09238	4.11885	1.38582	3.02164	2.38492	4.84691	2.70333	transcription factor HY5
CsaV3_2G031960(HY5)	3.30136	3.19389	1.54368	1.0538	2.79442	4.12028	2.38878	1.83225		2.20408	5.04125	5.40152	13.8136	5.80666	3.09003	2.21585	1.56674	Transcription factor hy5
CsaV3_5G020710(TCP21_Like)	0.972165	1.54481	1.12958	0.121509	4.39248	4.84425	1.47266	0.220256		5.03402	3.83041	1.40789	2.48834	5.06139	6.21225	1.64095	1.00147	transcription factor TCP21-like
CsaV3_5G006010(TCP7_Like)	148.754	38.3552	76.635	50.7358	128.699	71.0454	56.5845	54.7642		49.7007	40.1512	29.5258	67.0219	99.0848	141.797	82.937	64.7108	transcription factor TCP7-like
CsaV3_5G000090(APRR5)	30.6933	123.86	64.966	227.89	61.1876	110.04	67.9258	31.5299		129.406	104.48	164.107	113.641	90.4143	78.912	44.0809	64.4449	two-component response regulator-like APRR5
CsaV3_4G024430(APRR7)	397.698	150.366	188.774	140.594	153.772	145.098	135.05	63.1365		194.76	179.298	112.508	192.681	251.659	197.816	167.737	163.71	two-component response regulator-like APRR7
CsaV3_3G050020(COP1)	1.11675	0.33008	0.156273	0.249086	0.734834	0.408021	0.14439	0.24648		0.245283	0.174407	0.183574	0.245421	0.401631	0.37613	0.154999	0.158124	Ubiquitin ligase protein cop1

## Sheet: Photosynthesis
	XS10	XS20	XS30	XS40	XN10	XN20	XN30	XN40		CS10	CS20	CS30	CS40	CN10	CN20	CN30	CN40	Annotation
Gene ID		Log10 (FPKM)									Log10 (FPKM)
CsaV3_4G007600	2.1963	1.97162	2.37634	2.00919	1.93007	1.72886	1.93639	1.89566		2.086	1.6289	1.62763	1.78729	1.78946	1.90145	2.07504	2.01846	10 kDa photosystem II polypeptide
CsaV3_UNG203710	-0.957489	-0.373292	-1.24372	-0.223061	-1.06804	-0.660311	-0.237894	-0.499805		-0.988449	-0.825406	-0.419807	-0.563039	-0.857204	-1.60255	0	-1.17726	ATP synthase epsilon chain, chloroplastic
CsaV3_6G049050	0.906587	1.01455	1.42673	0.895333	1.00228	0.902088	0.903303	0.911322		1.25127	0.817213	0.560537	1.07662	1.08681	1.03032	1.02263	0.479714	ATP synthase gamma chain
CsaV3_1G010750	1.2723	1.47807	1.80636	1.50938	1.62535	1.32641	1.67229	1.78427		1.51695	1.31974	1.03538	1.31905	1.52904	1.46685	1.72701	1.74554	ATP synthase gamma chain
CsaV3_UNG207830	-0.160625	-0.727617	-0.26115	0.225692	-0.166149	-0.603081	0.138966	0.292791		-0.215901	-0.397323	-0.177927	-0.70119	-0.130602	-0.409276	-0.396049	-0.274054	ATP synthase subunit a, chloroplastic
CsaV3_UNG203700	-0.610675	-0.828947	-0.593837	-0.00958487	-0.714627	-0.522414	-0.174633	-0.0777172		-0.703584	-0.788553	-0.633441	-0.453393	-0.60965	-0.756211	-0.904014	-0.737377	ATP synthase subunit beta, chloroplastic
CsaV3_4G007360	0.400391	-0.138568	0.0271545	0.448629	0.216299	0.285044	0.485251	0.611214		0.126828	0.215845	0.15929	-2.00687	0.376139	-0.0314494	-0.210809	0.0512935	Cytochrome b6
CsaV3_7G004050	1.62888	1.49232	1.86146	1.95618	1.72564	1.6302	1.98865	2.09229		1.60142	1.45476	1.26054	1.43931	1.54032	1.48032	1.77741	1.71784	Cytochrome b6-f complex iron-sulfur subunit
CsaV3_6G053010	1.04783	0.717692	1.0899	0.74264	1.21392	0.978208	1.18746	1.05492		0.834689	1.06205	0.544875	0.911016	1.2461	1.13353	1.12543	0.761266	cytochrome c6, chloroplastic
CsaV3_UNG209270	-1.14697	-0.84753	-0.224695	-0.0478734	-0.394331	-0.242064	-0.1756	-0.202021		-0.736822	-0.435168	-0.698691	-0.627669	-0.183519	-0.331897	-0.151804	-0.113297	Cytochrome f
CsaV3_3G049310	1.04263	0.949969	1.05344	0.927339	0.789664	0.843747	0.973749	1.11151		0.958271	0.796516	0.784801	0.747951	0.900811	0.924057	0.827998	1.02471	Ferredoxin
CsaV3_3G013320	0.977001	0.755165	1.37522	0.936882	0.860315	0.897496	0.998676	1.03586		1.1693	0.962721	0.843354	1.03029	0.831977	1.02161	1.20288	1.16187	Ferredoxin
CsaV3_3G019210	-0.32609	0.749675	0.454768	0.32448	0.724329	0.534376	0.346052	-0.355111		0.218882	-0.0604434	0.0780314	0.426874	0.708314	0.653146	-0.0198206	-0.484153	Ferredoxin
CsaV3_3G000770	1.4958	0.959433	1.7124	1.71334	1.28503	1.30436	1.67293	1.67321		1.34446	1.02377	0.783949	1.06622	1.23925	1.15186	1.54742	1.53425	Ferredoxin--NADP reductase
CsaV3_6G052330	1.75573	1.63331	1.78097	1.78889	1.65592	1.7802	1.63317	1.62479		1.6901	1.71816	1.53297	1.67185	1.72845	1.71104	1.65765	1.85877	Ferredoxin--NADP reductase, chloroplastic
CsaV3_3G008130	0	0.0359162	-0.805582	-1.7057	-0.229229	-0.213673	-0.613628	-1.10378		-0.730014	-0.157797	-0.678602	-0.397241	-0.483679	-0.759069	-1.44641	0	Oxygen-evolving enhancer 3-2, chloroplastic-like protein
CsaV3_1G011330	1.5701	1.44044	1.95147	1.30559	1.56401	1.0775	1.4286	1.4591		1.53917	1.08236	0.85442	1.24378	1.34413	1.41661	1.62	1.29872	oxygen-evolving enhancer protein 3-2, chloroplastic
CsaV3_UNG201530	0.0851415	-0.357065	-0.514781	0.080259	-0.458474	-0.445044	-0.135766	-0.0121295		-0.388088	-0.359603	-0.284199	-0.336672	-0.492626	-0.514168	-0.544847	-0.476806	Photosystem I P700 chlorophyll a apoprotein A1
CsaV3_3G013420	1.53018	1.54243	2.26417	1.48956	1.60983	1.1013	1.41649	1.52382		1.84671	0.931102	0.843432	1.34371	1.58035	1.66114	1.8355	1.49765	Photosystem I reaction center subunit II like
CsaV3_1G046680	1.67634	1.90833	2.21874	2.01368	1.90301	1.49423	1.79822	1.97268		1.75484	1.41813	1.48509	1.55385	1.66024	1.73134	1.83458	1.73048	Photosystem I reaction center subunit III
CsaV3_2G010090	1.36171	1.34862	1.70684	1.09854	1.36459	0.944962	1.07923	0.958129		1.45073	0.886188	0.756711	1.05279	1.15325	1.22334	1.42116	0.975767	Photosystem I reaction center subunit IV
CsaV3_6G041600	1.7606	1.62703	2.14872	1.28638	1.49378	1.09334	1.24197	1.14385		1.89616	1.00786	1.20981	1.32771	1.32595	1.56869	1.73668	1.32054	photosystem I reaction center subunit N, chloroplastic
CsaV3_6G052210	1.18064	1.65346	1.81345	1.19552	1.20228	1.11701	0.952325	0.912		1.34027	0.70065	0.837508	1.00657	1.16738	1.21404	1.43143	0.985291	Photosystem I reaction center subunit psaK
CsaV3_3G004330	1.30758	1.49225	1.92598	1.41007	1.62075	1.32401	1.51337	1.4621		1.61553	0.938438	0.678157	1.20901	1.30197	1.33817	1.61197	1.31332	photosystem I reaction center subunit V, chloroplastic
CsaV3_3G025000	1.05182	1.08763	1.56935	1.27318	1.19028	0.88119	1.3347	1.39791		1.14571	0.734023	0.471906	0.870958	1.49295	0.976258	1.36293	1.12734	photosystem I reaction center subunit VI, chloroplastic
CsaV3_2G009680	1.69705	1.01821	1.4318	1.10315	1.10915	0.499741	0.957244	1.1072		1.01961	0.496801	0.265338	0.219708	0.78182	0.909856	1.06029	0.664367	Photosystem I reaction center subunit XI
CsaV3_1G015100	2.404	2.55468	2.72928	2.22428	2.31168	2.03315	2.29001	2.36235		2.46413	1.76255	1.92054	2.05379	2.10579	2.12258	2.43285	1.97867	photosystem I subunit O
CsaV3_6G034480	0.933603	1.08131	0.970191	1.23737	1.04238	1.25514	1.16141	1.19976		1.03858	0.924513	1.25148	0.983836	0.812961	0.95009	1.18543	0.956472	photosystem II 22 kDa protein, chloroplastic
CsaV3_4G026390	-1.50478	-1.00229	-0.949129	0.243946	-0.661272	-0.330486	-0.000282828	-0.0325756		-0.570556	-0.347196	-0.233659	-0.187475	-0.144899	-0.777488	-0.419939	-0.658298	Photosystem II D2 protein
CsaV3_7G004300	-0.0110052	-0.389674	0.710011	-0.559219	0.217387	-0.460869	-0.125658	-0.221492		0.0995074	-0.275919	-1.00583	0.411606	0.501007	0.294818	0.256095	-0.155111	Photosystem II lipoprotein Psb27
CsaV3_6G042680	2.17432	2.27637	2.55519	2.44336	2.04093	1.77361	2.17874	2.3856		2.22609	1.56392	1.63569	1.85306	1.81017	1.89924	2.17428	1.96574	Photosystem II oxygen-evolving enhancer protein
CsaV3_4G007520	1.46558	1.94315	2.3416	2.33556	1.98346	1.81926	2.20699	2.32451		1.94451	1.48333	1.57682	1.6125	1.72241	1.82655	2.1524	1.95404	Photosystem II oxygen-evolving enhancer protein II-2
CsaV3_1G025480	0.0697183	-0.349406	-0.558542	0.247704	-0.270838	-0.0783623	0.220036	0.476125		-0.211956	-0.259243	-0.246819	-0.683804	-0.189409	-0.489286	-0.534471	-0.12501	Photosystem II protein D1
CsaV3_2G004030	1.9287	1.71669	2.38763	2.20711	1.98873	1.77444	2.36345	2.44775		1.84489	1.70147	0.936328	1.92979	2.06389	1.82697	2.11497	2.30017	photosystem II reaction center W protein, chloroplastic-like
CsaV3_7G027520	1.77312	1.84326	2.11454	1.48483	1.96597	1.73754	1.76859	1.58607		1.85241	1.56434	1.29	1.68508	1.85605	1.81661	1.94039	1.74306	photosystem II reaction center W protein, chloroplastic-like
CsaV3_3G046150	1.66655	1.41871	2.17438	1.79052	1.44274	1.12021	1.62401	1.86919		1.59718	0.929317	1.04	1.31271	1.5866	1.56087	1.75926	1.54168	Plastocyanin
CsaV3_5G026220	0.704097	0.564347	0.691744	0.543262	0.67021	0.574943	0.583293	0.604388		0.548251	0.618106	0.481488	0.0436473	0.668298	0.466559	0.466239	0.211639	psbP-like protein 1, chloroplastic
CsaV3_6G007340	1.21005	0.927176	0.951764	1.28683	0.80905	0.966271	1.05056	1.16038		1.11995	0.878101	1.06863	0.95368	1.03459	0.929811	0.96979	1.22761	Unknown protein
