# Supplementary material for: Transcriptomic and Physiological Analyses Reveal Potential Genes Involved in Photoperiod-Regulated β-Carotene Accumulation Mechanisms in the Endocarp of Cucumber (Cucumis sativus L.) Fruit
Source: Int J Mol Sci. 2022 Oct 21;23(20):12650. doi: 10.3390/ijms232012650 (PMC9604348; doi:10.3390/ijms232012650)
Supplement: Supplementary file 1 [file ijms-23-12650-s001.zip › Supplementary Datasheet S7_ Statistics of WGCNA modules and associated DEGs.xlsx]

## Sheet: DEGS_12257 
CsaV3_5G001810	MYB transcription factor
CsaV3_3G048620	RING-type E3 ubiquitin transferase
CsaV3_5G023030	Zinc finger protein
CsaV3_6G009230	Seed nucellus-specific protein
CsaV3_3G036680	Sequence-specific DNA binding transcription factor
CsaV3_2G013170	protein SIEVE ELEMENT OCCLUSION B-like
CsaV3_6G049180	Homeobox-leucine zipper protein like
CsaV3_1G010540	p55
CsaV3_1G010550	p55
CsaV3_7G000640	Retrovirus-related Pol polyprotein from transposon TNT 1-94
CsaV3_6G008840	Hfr-2-like protein
CsaV3_2G014490	Non-symbiotic hemoglobin, putative
CsaV3_2G017980	terpene synthase 10-like isoform X1
CsaV3_1G007040	Beta-glucosidase, putative
CsaV3_5G003880	21 kDa protein-like
CsaV3_7G030340	short-chain dehydrogenase reductase 3b-like
CsaV3_1G012670	Unknown protein
CsaV3_4G023920	Lipoxygenase
CsaV3_3G032470	Metal transporter, putative
CsaV3_6G045370	Unknown protein
CsaV3_2G018340	MYB transcription factor
CsaV3_7G022970	Defensin-like protein 3
CsaV3_7G000650	auxin-induced protein 15A-like
CsaV3_6G009140	squamosa promoter-binding-like protein 8
CsaV3_2G036120	disease resistance protein At4g27190-like
CsaV3_2G003820	Prolyl 4-hydroxylase alpha-like protein
CsaV3_3G024970	Homeobox-leucine zipper protein like
CsaV3_5G028550	Heavy metal-associated domain protein
CsaV3_2G010110	GDSL esterase/lipase
CsaV3_2G008530	Transcription factor/transcription regulator
CsaV3_4G029470	Auxin efflux carrier component
CsaV3_1G038290	Calmodulin-binding protein
CsaV3_1G010520	ankyrin repeat-containing protein At3g12360-like
CsaV3_3G030020	Seed nucellus-specific protein
CsaV3_7G023360	polyol transporter 5-like
CsaV3_6G038480	E3 ubiquitin-protein ligase
CsaV3_2G023220	Lipoxygenase
CsaV3_3G023650	1-aminocyclopropane-1-carboxylate oxidase
CsaV3_3G032280	DNA-damage-repair/toleration protein DRT100-like
CsaV3_5G017320	Glutamate decarboxylase
CsaV3_1G027860	Vesicle-associated membrane protein
CsaV3_3G034940	60S Ribosomal protein
CsaV3_3G037410	GATA zinc finger protein
CsaV3_6G004860	Transmembrane protein, putative
CsaV3_6G042890	Dof zinc finger protein like
CsaV3_4G036970	Transmembrane protein
CsaV3_2G028190	WAS protein family homolog 1-like
CsaV3_5G010900	Expansin
CsaV3_1G007780	BAHD acyltransferase At5g47980-like
CsaV3_3G005070	Reactive intermediate/imine deaminase
CsaV3_5G010690	Amino acid transporter
CsaV3_2G014710	Radialis
CsaV3_1G007940	HPP
CsaV3_4G004760	inactive TPR repeat-containing thioredoxin TTL3
CsaV3_7G003290	Basic-leucine zipper transcription factor
CsaV3_6G042840	B3 domain-containing transcription factor VRN1-like
CsaV3_3G038590	zinc finger protein 8-like
CsaV3_5G008050	Actin
CsaV3_3G003680	(-)-germacrene D synthase-like
CsaV3_7G032840	pleiotropic drug resistance protein 1-like
CsaV3_2G012540	Cyclopropane-fatty-acyl-phospholipid synthase
CsaV3_2G017880	terpene synthase 10-like
CsaV3_6G001310	AT-hook motif nuclear-localized protein
CsaV3_6G002150	Hypoxia-responsive family protein
CsaV3_1G036650	Epidermal patterning factor-like protein
CsaV3_3G040980	lamin-like protein
CsaV3_3G042120	alpha-dioxygenase 1
CsaV3_7G024980	alcohol dehydrogenase-like
CsaV3_3G036800	Unknown protein
CsaV3_3G048530	GATA transcription factor
CsaV3_1G043540	heat stress transcription factor B-4b-like
CsaV3_1G028150	Unknown protein
CsaV3_3G003670	(-)-germacrene D synthase-like
CsaV3_1G014560	Stress responsive A/B Barrel Domain
CsaV3_1G043630	IQ domain-containing protein
CsaV3_7G022410	Unknown protein
CsaV3_2G013420	EPIDERMAL PATTERNING FACTOR-like protein
CsaV3_1G032570	Agamous-like MADS-box protein
CsaV3_6G041470	Unknown protein
CsaV3_6G006900	Natterin-3 like
CsaV3_7G029570	Endoglucanase
CsaV3_1G007100	thaumatin-like protein
CsaV3_7G034210	ABC transporter B family-like protein
CsaV3_3G043730	Hydroxyproline-rich glycoprotein family protein
CsaV3_5G030520	lysine histidine transporter 1
CsaV3_6G030990	Acyl-[acyl-carrier-protein] desaturase
CsaV3_3G048180	Oligopeptide transporter like
CsaV3_6G042740	Unknown protein
CsaV3_7G006260	UDP-glucuronosyltransferase
CsaV3_6G052910	MADS-box transcription factor
CsaV3_UNG227840	D-3-phosphoglycerate dehydrogenase
CsaV3_2G006390	Lipoxygenase
CsaV3_4G023350	Protein of unknown function (DUF620)
CsaV3_4G001990	U11/U12 small nuclear ribonucleoprotein 25 kDa protein, putative
CsaV3_1G007050	Laccase
CsaV3_1G045230	SNF1-related protein kinase regulatory subunit gamma-1-like
CsaV3_2G030310	transcription factor bHLH30-like
CsaV3_3G002950	14 kDa proline-rich protein DC2.15-like
CsaV3_1G011510	Protein DETOXIFICATION
CsaV3_1G041020	Rho guanine nucleotide exchange factor
CsaV3_2G014200	Protein kinase superfamily protein
CsaV3_4G030350	Cysteine proteinase inhibitor
CsaV3_7G021300	GPI-anchored protein LORELEI
CsaV3_4G001040	Cellulose synthase
CsaV3_4G035240	DUF4378 domain-containing protein
CsaV3_2G002260	transcription repressor OFP8-like
CsaV3_3G047560	RNA-binding protein
CsaV3_4G028850	Leaf rust 10 disease-resistance locus receptor-like protein kinase
CsaV3_7G000680	SAUR-like auxin-responsive protein family
CsaV3_6G050950	transcription factor TGA6
CsaV3_3G044770	Unknown protein
CsaV3_4G012050	plant cysteine oxidase 2-like
CsaV3_2G034600	Basic-leucine zipper transcription factor
CsaV3_4G010560	sister chromatid cohesion 1 protein 3
CsaV3_7G003800	cysteine-rich repeat secretory protein 38-like
CsaV3_4G023660	Peroxidase
CsaV3_6G037400	elongation of fatty acids protein 3-like
CsaV3_3G012410	transcriptional regulator SUPERMAN-like
CsaV3_3G023600	Histidine phosphotransfer protein
CsaV3_3G018550	BEST plant protein match is: (TAIR:plant.1) protein, putative
CsaV3_5G021810	Calcium-binding EF hand family protein
CsaV3_5G036180	N-acetyltransferase
CsaV3_5G014550	Retrotransposon protein, putative, Ty3-gypsy subclass
CsaV3_3G003660	(-)-germacrene D synthase-like
CsaV3_5G034330	LOB domain-containing protein, putative
CsaV3_1G010610	F-box protein
CsaV3_3G042780	denticleless protein homolog
CsaV3_2G035740	benzyl alcohol O-benzoyltransferase-like
CsaV3_7G011400	Early nodulin-like protein
CsaV3_3G004020	caffeic acid 3-O-methyltransferase-like
CsaV3_7G033570	Ethylene-responsive transcription factor
CsaV3_4G014610	Unknown protein
CsaV3_2G005230	Hexosyltransferase
CsaV3_1G026750	36.4 kDa proline-rich protein
CsaV3_3G042060	gibberellin-regulated protein 2-like
CsaV3_4G032570	leucine-rich repeat receptor-like serine/threonine-protein kinase BAM1
CsaV3_4G033240	Unknown protein
CsaV3_2G029180	Glutamate receptor
CsaV3_6G040950	transcription repressor OFP13
CsaV3_2G002720	Early nodulin 93 protein
CsaV3_4G000130	Angiogenin-2 like
CsaV3_4G009080	1-aminocyclopropane-1-carboxylate synthase
CsaV3_1G011960	Carboxypeptidase
CsaV3_1G030200	ethylene-responsive transcription factor WIN1-like
CsaV3_5G035040	Pectinesterase
CsaV3_6G000200	Unknown protein
CsaV3_5G037960	ABC transporter B family protein
CsaV3_3G041620	plant cysteine oxidase 2
CsaV3_2G014260	CSL zinc finger domain-containing protein
CsaV3_6G037080	Basic helix-loop-helix transcription factor
CsaV3_6G000140	phragmoplast orienting kinesin-1 isoform X1
CsaV3_2G031890	Zinc finger (Ran-binding) family protein
CsaV3_2G017640	GDSL esterase/lipase 1-like
CsaV3_5G028530	Fasciclin-like arabinogalactan protein
CsaV3_3G044200	G-type lectin S-receptor-like serine/threonine-protein kinase At4g27290
CsaV3_6G037730	clathrin coat assembly protein AP180
CsaV3_1G036580	CONSTANS-like zinc finger protein
CsaV3_UNG218470	BZIP transcription factor, putative (DUF630 and DUF632)
CsaV3_1G007960	protein NRT1/ PTR FAMILY 2.8
CsaV3_2G014920	Short-chain dehydrogenase/reductase
CsaV3_4G027750	Cytokinin dehydrogenase
CsaV3_4G009950	Unknown protein
CsaV3_6G042850	B3 domain-containing transcription factor VRN1-like
CsaV3_2G006830	wall-associated receptor kinase-like 20
CsaV3_4G000100	Phytosulfokines 3
CsaV3_6G038150	Amine oxidase
CsaV3_7G003920	Xyloglucan endotransglucosylase/hydrolase
CsaV3_UNG227790	Lipase
CsaV3_4G032770	Bromodomain and PHD finger containing 1
CsaV3_5G039570	DNA primase
CsaV3_1G012270	DNA ligase 1-like
CsaV3_1G041790	protochlorophyllide-dependent translocon component 52, chloroplastic-like
CsaV3_5G001210	short-chain dehydrogenase TIC 32, chloroplastic-like
CsaV3_3G042140	alpha-dioxygenase 1
CsaV3_4G036980	TOPLESS-related 1 isoform 1
CsaV3_2G001540	1-aminocyclopropane-1-carboxylate oxidase 1
CsaV3_3G034410	Copper transporter, putative
CsaV3_6G038070	transcription factor PAR2-like
CsaV3_2G008620	Heavy metal ATPase 3
CsaV3_1G004320	Phosphoethanolamine N-methyltransferase
CsaV3_6G044110	BTB/POZ domain-containing protein At3g49900
CsaV3_5G003460	Cytochrome P450, putative
CsaV3_6G008390	probably inactive receptor-like protein kinase At2g46850
CsaV3_7G004470	Histone-lysine N-methyltransferase, H3 lysine-36 specific
CsaV3_7G003610	Protein DETOXIFICATION
CsaV3_1G010720	Hexosyltransferase
CsaV3_3G031190	D-3-phosphoglycerate dehydrogenase
CsaV3_7G000700	Auxin-responsive protein
CsaV3_1G012180	Sphingolipid delta(4)-desaturase DES1-like
CsaV3_2G028240	serpin-ZX-like
CsaV3_3G028190	exocyst complex component EXO84C-like
CsaV3_6G040370	glucomannan 4-beta-mannosyltransferase 9-like
CsaV3_5G021890	High mobility group B protein like
CsaV3_2G016870	BEST plant protein match is: (TAIR:plant.1) protein, putative
CsaV3_4G035060	ZCF37, putative
CsaV3_1G041360	21 kDa protein
CsaV3_1G046290	Protein EXORDIUM-like
CsaV3_3G032160	Late embryogenesis abundant protein
CsaV3_6G050370	Proline-rich protein like
CsaV3_1G002970	Replication protein A subunit
CsaV3_2G032120	EEIG1/EHBP1 N-terminal domain protein
CsaV3_7G030330	short-chain dehydrogenase reductase 3b-like
CsaV3_5G014820	Cysteine proteinase inhibitor
CsaV3_6G002170	Peroxidase
CsaV3_3G038450	Unknown protein
CsaV3_1G004330	Phosphoethanolamine N-methyltransferase
CsaV3_3G012370	DNA repair helicase rad5,16, putative
CsaV3_2G013140	protein SIEVE ELEMENT OCCLUSION B-like
CsaV3_1G011190	Ty3/gypsy retrotransposon protein
CsaV3_3G038140	Glutaredoxin family protein, putative
CsaV3_5G001220	cell division cycle 20.2, cofactor of APC complex-like
CsaV3_7G029940	DNA replication licensing factor MCM7
CsaV3_5G000930	Membrane-associated kinase regulator 6
CsaV3_7G006620	Glycosyltransferase
CsaV3_6G046000	glycerophosphodiester phosphodiesterase GDPDL6-like
CsaV3_7G029010	wee1-like protein kinase
CsaV3_6G030980	proline-rich receptor-like protein kinase PERK10
CsaV3_1G042630	Unknown protein
CsaV3_7G029580	Pectinesterase
CsaV3_4G024460	myosin heavy chain, cardiac muscle isoform-like isoform X1
CsaV3_4G025480	protein NRT1/ PTR FAMILY 2.8-like
CsaV3_7G010130	Unknown protein
CsaV3_5G004290	Aquaporin-like protein
CsaV3_6G035880	alpha/beta hydrolase domain-containing protein 17B-like
CsaV3_2G001780	Profilin
CsaV3_7G024960	alcohol dehydrogenase-like
CsaV3_5G028950	protein CHUP1, chloroplastic-like
CsaV3_4G010500	Receptor protein kinase-like protein
CsaV3_6G003190	Rho GTPase activating protein
CsaV3_5G003010	Unknown protein
CsaV3_2G025940	Kinesin-like protein
CsaV3_1G007110	EH domain-containing protein 1
CsaV3_5G036810	Aspartyl protease
CsaV3_4G007100	Late embryogenesis abundant protein
CsaV3_7G027290	Alpha/beta hydrolase-3
CsaV3_5G034610	Auxin-responsive protein
CsaV3_2G003980	receptor-like protein kinase ANXUR2
CsaV3_5G028660	Histone chaperone
CsaV3_6G037980	HVA22-like protein
CsaV3_6G016780	30S ribosomal protein S7, chloroplastic
CsaV3_5G003890	21 kDa protein-like
CsaV3_3G012950	protein IQ-DOMAIN 14
CsaV3_4G029350	Mitotic cyclin
CsaV3_1G030370	cucumber peeling cupredoxin-like
CsaV3_2G010800	Origin recognition complex, subunit 6
CsaV3_3G037710	transcription repressor OFP13
CsaV3_4G032700	Glucan endo-1,3-beta-glucosidase
CsaV3_2G013080	protein SIEVE ELEMENT OCCLUSION B-like
CsaV3_1G030730	leucine-rich repeat extensin-like protein 4
CsaV3_3G011840	protein NRT1/ PTR FAMILY 5.2-like
CsaV3_3G003360	LRR receptor-like kinase family protein
CsaV3_UNG227820	D-3-phosphoglycerate dehydrogenase
CsaV3_5G026140	Chalcone-flavonone isomerase family protein
CsaV3_6G050170	Structural constituent of cell wall
CsaV3_2G012040	Receptor-like protein kinase
CsaV3_5G038230	Transmembrane emp24 domain-containing protein
CsaV3_3G013090	PV100
CsaV3_2G035240	Transferring glycosyl group transferase
CsaV3_3G034070	Unknown protein
CsaV3_3G016640	LOW protein: M-phase inducer phosphatase-like protein
CsaV3_3G036380	Pectinesterase
CsaV3_1G042250	Cytosine-specific methyltransferase
CsaV3_6G040330	Pyruvate kinase
CsaV3_3G040520	Unknown protein
CsaV3_3G002870	36.4 kDa proline-rich protein
CsaV3_3G015380	Unknown protein
CsaV3_3G037240	Cell division protein ftsZ, putative
CsaV3_3G034330	Myosin-M heavy protein
CsaV3_3G011130	Non-specific serine/threonine protein kinase
CsaV3_2G026360	Cyclin
CsaV3_6G037680	Endoglucanase
CsaV3_6G008850	Hfr-2-like protein
CsaV3_3G022070	piriformospora indica-insensitive protein 2
CsaV3_3G038820	ABC transporter ATP-binding/permease protein like
CsaV3_1G034450	Haloacid dehalogenase-like hydrolase (HAD) superfamily protein
CsaV3_1G011460	transcription factor bHLH112-like isoform X1
CsaV3_4G030080	serine/threonine-protein kinase SRK2G-like isoform X1
CsaV3_7G003870	transcription factor bHLH117
CsaV3_1G028620	Plasma membrane ATPase
CsaV3_5G014560	MLP-like protein 328
CsaV3_1G044050	microtubule-associated protein TORTIFOLIA1
CsaV3_7G031740	Tubby-like protein
CsaV3_3G046840	DDT domain-containing protein DDR4-like
CsaV3_5G001610	Electron transporter
CsaV3_4G013350	Syntaxin, putative
CsaV3_3G028200	Brca1-associated ring domain protein 1
CsaV3_3G018460	Unknown protein
CsaV3_5G039560	Endo-1,3(4)-beta-glucanase 1
CsaV3_6G037720	Glucan endo-1,3-beta-glucosidase 3
CsaV3_3G047210	DNA topoisomerase 1 isoform X2
CsaV3_2G026480	Leucine-rich repeat (LRR) family protein
CsaV3_6G006970	Hfr-2-like protein
CsaV3_7G001650	Arabidopsis protein of unknown function (DUF241)
CsaV3_6G046640	AAA-ATPase At2g18193-like
CsaV3_3G020440	Cycloidea-like protein group 1A
CsaV3_5G011240	SAM dependent carboxyl methyltransferase
CsaV3_1G004230	GPI-anchored protein
CsaV3_5G014240	Receptor-like protein kinase
CsaV3_6G039490	serine/threonine-protein kinase-like protein CCR1
CsaV3_7G006340	chaperone protein dnaJ 20, chloroplastic-like
CsaV3_3G004380	zinc finger CCCH domain-containing protein 18-like
CsaV3_5G033850	protein MIZU-KUSSEI 1
CsaV3_6G013080	O-methyltransferase, putative
CsaV3_3G014200	aspartic proteinase CDR1-like
CsaV3_7G002480	fasciclin-like arabinogalactan protein 2
CsaV3_6G001520	TIP41-like protein
CsaV3_6G017120	histone H4
CsaV3_1G040040	Meiotic nuclear division protein 1 homolog
CsaV3_4G032990	protein transport protein Sec61 subunit alpha-like
CsaV3_1G042610	Histone H3
CsaV3_2G032110	Unknown protein
CsaV3_4G023770	Multiple C2 and transmembrane domain-containing 1
CsaV3_6G017030	histone H4
CsaV3_6G037270	F-box protein
CsaV3_1G036400	RING-H2 finger protein
CsaV3_2G032510	early nodulin-like protein 1
CsaV3_7G008040	cyclin-A3-1-like isoform X2
CsaV3_6G013100	Flavin-containing monooxygenase
CsaV3_5G035070	Beta-glucosidase
CsaV3_4G030330	Cysteine proteinase inhibitor
CsaV3_6G003690	Histone H3
CsaV3_4G028450	O-fucosyltransferase family protein
CsaV3_6G022690	Butirosin biosynthesis
CsaV3_2G014500	DUF4228 domain protein
CsaV3_7G022980	low-molecular-weight cysteine-rich 69
CsaV3_1G039330	histidine-containing phosphotransfer protein 1-like
CsaV3_5G035630	Cytochrome P450
CsaV3_6G031220	protein STAY-GREEN LIKE, chloroplastic
CsaV3_4G005900	Subtilisin-like protease
CsaV3_6G015660	piriformospora indica-insensitive protein 2-like
CsaV3_5G038470	Unknown protein
CsaV3_3G002430	ATP-dependent caseinolytic protease/crotonase family protein
CsaV3_1G012680	transcription factor TCP10-like
CsaV3_7G031310	Histone H3
CsaV3_3G023380	indole-3-acetic acid-amido synthetase GH3.6
CsaV3_6G052610	WRKY transcription factor, putative
CsaV3_3G022540	CDT1-like protein a, chloroplastic
CsaV3_1G036510	Laccase
CsaV3_6G006930	Dirigent protein
CsaV3_4G010540	protein POLYCHOME
CsaV3_4G036680	U-box domain-containing protein
CsaV3_5G000860	protein timeless homolog
CsaV3_6G051530	Chlorophyll a-b binding protein, chloroplastic
CsaV3_2G029170	WAT1-related protein
CsaV3_2G029030	transmembrane protein 136
CsaV3_3G019070	glutelin type-A 2-like
CsaV3_3G017530	Dna-directed primase/polymerase protein
CsaV3_4G007130	Embryo defective 3006, putative isoform 1
CsaV3_6G047310	Protein pollenless 3-like 2
CsaV3_1G042260	Metal tolerance protein
CsaV3_2G015860	Armadillo
CsaV3_6G009270	Arginine--tRNA ligase
CsaV3_1G045800	bark storage protein A
CsaV3_2G009420	Beta-hexosaminidase
CsaV3_2G015430	auxin-responsive protein SAUR24-like
CsaV3_3G036070	Xyloglucan endotransglucosylase/hydrolase
CsaV3_4G023760	AMP-dependent synthetase/ligase
CsaV3_6G043120	Transcription factor
CsaV3_7G001060	Glycerate dehydrogenase
CsaV3_3G042900	Gdsl esterase/lipase
CsaV3_4G004930	Somatic embryogenesis receptor kinase
CsaV3_6G044340	Ap2-like ethylene-responsive transcription factor ant
CsaV3_6G006880	Natterin-3 like
CsaV3_2G006780	TPR repeat protein
CsaV3_3G011830	protein NRT1/ PTR FAMILY 5.2-like
CsaV3_7G022780	RNA polymerase II elongation factor
CsaV3_2G003410	lysosomal Pro-X carboxypeptidase
CsaV3_1G008630	Guanine nucleotide-binding protein, beta subunit
CsaV3_3G037920	N-acetyltransferase
CsaV3_2G013370	perakine reductase-like
CsaV3_3G011620	Auxin-responsive protein
CsaV3_3G005920	Wound-responsive family protein
CsaV3_6G017110	histone H4
CsaV3_1G009530	Protein kinase domain
CsaV3_6G012330	Cyclin
CsaV3_1G003530	Kinesin-like protein
CsaV3_7G001400	O-methyltransferase
CsaV3_1G009340	Up-regulator of cell proliferation like
CsaV3_3G016100	Structural maintenance of chromosomes protein
CsaV3_6G015810	protodermal factor 1-like
CsaV3_6G016610	Ribulose bisphosphate carboxylase/oxygenase activase
CsaV3_2G017750	S-adenosylmethionine mitochondrial carrier protein
CsaV3_3G015390	Beta-1,3-galactosyltransferase-like protein
CsaV3_3G039820	Unknown protein
CsaV3_1G007290	cell division cycle-associated protein 7-like
CsaV3_5G028780	Receptor protein kinase-like protein
CsaV3_3G038700	homeobox-leucine zipper protein HOX11
CsaV3_2G029480	WEB family protein At1g75720-like
CsaV3_6G003480	Alpha-xylosidase
CsaV3_3G019080	DNA-directed RNA polymerase subunit alpha
CsaV3_5G029660	BRCT domain-containing protein
CsaV3_1G014620	subtilisin-like protease SBT3.18
CsaV3_6G051520	Chlorophyll a-b binding protein, chloroplastic
CsaV3_3G048110	Rhamnogalacturonate lyase family protein
CsaV3_3G041480	Gibberellin regulated protein
CsaV3_2G029570	Tubulin beta chain
CsaV3_4G007670	kinesin-like calmodulin-binding protein
CsaV3_3G016940	Receptor-like kinase
CsaV3_6G052190	protein BREAST CANCER SUSCEPTIBILITY 1 homolog
CsaV3_5G027240	ATP-dependent DNA helicase MER3-like protein
CsaV3_7G004300	Photosystem II lipoprotein Psb27
CsaV3_3G003370	protein TPX2 isoform X1
CsaV3_2G030500	transcription factor bHLH93-like
CsaV3_7G007730	Photosystem I reaction centre subunit N
CsaV3_7G026150	cell division control protein 45 homolog
CsaV3_1G001580	Polygalacturonase-1 non-catalytic subunit beta
CsaV3_1G009070	Pectinesterase
CsaV3_5G026940	Cytochrome P450
CsaV3_2G032680	Glutamate receptor
CsaV3_6G002200	Alkylated DNA repair protein
CsaV3_3G043390	Knotted 1-binding protein
CsaV3_1G003670	transcription factor DIVARICATA
CsaV3_2G024660	Polygalacturonase
CsaV3_3G033200	transcription repressor OFP2-like
CsaV3_5G017280	Protease inhibitor/seed storage/lipid transfer protein family protein
CsaV3_6G036810	chloroplast stem-loop binding protein of 41 kDa
CsaV3_5G026770	Protein FIZZY-RELATED like
CsaV3_7G032790	root phototropism protein 3
CsaV3_4G000610	Regulator of chromosome condensation (RCC1) family with FYVE zinc finger domain-containing protein
CsaV3_3G015840	Peptidylprolyl isomerase
CsaV3_6G040150	Histone H2B
CsaV3_1G028840	Reticulon-like protein
CsaV3_1G007140	Phosphoethanolamine N-methyltransferase
CsaV3_2G025930	growth-regulating factor 6-like
CsaV3_1G033760	Kinesin-like protein
CsaV3_7G026890	Pathogenic type III effector avirulence factor Avr AvrRpt-cleavage: cleavage site protein
CsaV3_2G014910	Glucose-1-phosphate adenylyltransferase
CsaV3_5G004970	Mannose-6-phosphate isomerase
CsaV3_3G011150	chromosome transmission fidelity protein 18 homolog
CsaV3_5G005960	monocopper oxidase-like protein SKU5
CsaV3_6G051630	DNA helicase
CsaV3_1G013900	Cystatin Hv-CPI6
CsaV3_3G032050	DNA topoisomerase 2
CsaV3_2G008210	(R)-mandelonitrile lyase 1-like
CsaV3_3G043930	Unknown protein
CsaV3_6G001720	Unknown protein
CsaV3_4G036180	DNA cross-link repair 1A protein
CsaV3_7G004100	Wound-responsive family protein
CsaV3_1G012980	MLO-like protein
CsaV3_4G032450	Glycosyltransferase
CsaV3_1G019610	Chlorophyll a-b binding protein, chloroplastic
CsaV3_6G044350	Unknown protein
CsaV3_4G006400	paramyosin-like
CsaV3_6G047810	Cyclin
CsaV3_5G003960	monocopper oxidase-like protein SKU5
CsaV3_5G036290	Aquaporin-like protein
CsaV3_3G001160	Cytosine-specific methyltransferase
CsaV3_7G003640	Protein DETOXIFICATION
CsaV3_4G035020	cyclin-D5-2-like
CsaV3_1G037320	Eukaryotic translation initiation factor 2A
CsaV3_7G005850	protein TPX2
CsaV3_4G024950	WD repeat-containing protein 44
CsaV3_2G001750	acid phosphatase 1-like
CsaV3_7G027590	F-box/lrr-repeat protein 17
CsaV3_5G031490	Polygalacturonase
CsaV3_5G005290	Na/K-ATPase alpha 2 subunit
CsaV3_6G052710	vacuolar protein sorting-associated protein 2 homolog 2
CsaV3_1G006890	Kinesin-like protein
CsaV3_4G010480	Acetate kinase
CsaV3_3G045640	protein IQ-DOMAIN 32 isoform X1
CsaV3_3G018140	Alpha-L-fucosidase
CsaV3_6G006180	SNARE-interacting protein KEULE
CsaV3_7G029210	Unknown protein
CsaV3_5G033110	cell division topological specificity factor homolog, chloroplastic
CsaV3_7G028340	Rho GTPase-activating protein
CsaV3_6G053180	DNA helicase
CsaV3_7G028120	titin-like isoform X2
CsaV3_4G035300	AP2-like ethylene-responsive transcription factor
CsaV3_5G037060	cysteine-rich repeat secretory protein 12-like
CsaV3_3G038980	protein STRUBBELIG-RECEPTOR FAMILY 2 isoform X2
CsaV3_2G001870	3-hydroxyisobutyrate dehydrogenase-like
CsaV3_3G020880	Unknown protein
CsaV3_5G032320	Unknown protein
CsaV3_7G024950	Alcohol dehydrogenase
CsaV3_3G015030	Unknown protein
CsaV3_6G039550	Aquaporin
CsaV3_3G040360	Condensin complex subunit 1
CsaV3_5G032290	thaumatin-like protein 1
CsaV3_7G030240	Pectinesterase
CsaV3_5G036960	proline-rich family protein
CsaV3_2G017650	GDSL esterase/lipase 5-like
CsaV3_2G014220	phragmoplast orienting kinesin 2
CsaV3_2G003910	protein ACCELERATED CELL DEATH 6-like
CsaV3_5G004980	Unknown protein
CsaV3_1G043420	Unknown protein
CsaV3_6G013180	Unknown protein
CsaV3_7G004240	CTTNBP 2 amino-terminal-like protein
CsaV3_3G016700	Sorbitol dehydrogenase
CsaV3_6G048270	heavy metal-associated isoprenylated plant protein 3-like
CsaV3_5G000290	histone-lysine N-methyltransferase ATXR6
CsaV3_2G003500	DNA helicase
CsaV3_3G035220	BnaA03g00580D protein
CsaV3_5G030320	ELMO domain-containing protein A
CsaV3_5G020710	transcription factor TCP21-like
CsaV3_7G003260	Glycosyltransferase
CsaV3_4G013560	Cyclin-dependent kinase
CsaV3_5G025230	chlorophyllase-1-like
CsaV3_6G040380	glucomannan 4-beta-mannosyltransferase 9-like
CsaV3_6G050730	Pyruvate decarboxylase
CsaV3_2G013770	Histone H2A
CsaV3_6G049170	glucose-6-phosphate/phosphate translocator 2, chloroplastic
CsaV3_5G032460	Tyrosine-protein kinase
CsaV3_2G036330	Unknown protein
CsaV3_2G015510	auxin-responsive protein SAUR24-like
CsaV3_4G036080	Receptor protein kinase
CsaV3_1G012650	Peroxidase
CsaV3_6G047460	aspartyl protease family protein 1-like
CsaV3_2G016580	FRIGIDA-like protein 5 isoform X1
CsaV3_6G008680	Kinase like protein
CsaV3_7G033270	Unknown protein
CsaV3_6G009430	Glucan endo-1,3-beta-glucosidase 1
CsaV3_7G028400	Histone H2A
CsaV3_4G037240	Cyclin
CsaV3_6G005350	Carbohydrate esterase
CsaV3_5G005380	65-kDa microtubule-associated protein 3-like
CsaV3_3G003740	GRAS family transcription factor
CsaV3_6G000900	E3 ubiquitin-protein ligase TRAIP-like
CsaV3_7G008310	Cyclin D3.2 protein
CsaV3_5G035370	replication protein A 14 kDa subunit B-like
CsaV3_3G039400	Serine hydrolase FSH
CsaV3_5G005430	Receptor-like protein kinase
CsaV3_1G041200	Early auxin response protein
CsaV3_2G012250	Multiple inositol polyphosphate phosphatase 1, putative
CsaV3_5G030750	protein terminal ear1 homolog
CsaV3_3G037550	Unknown protein
CsaV3_5G001590	Alcohol dehydrogenase, putative
CsaV3_5G004880	WD repeat-containing WRAP73
CsaV3_3G015010	heparanase-like protein 2
CsaV3_3G009230	plant UBX domain-containing protein 9
CsaV3_5G013150	D-galacturonate reductase-like
CsaV3_6G005340	Chlorophyll a-b binding protein, chloroplastic
CsaV3_4G033390	pectinesterase inhibitor-like
CsaV3_3G032410	cell division cycle 20.2, cofactor of APC complex-like
CsaV3_5G028160	Polcalcin Jun o
CsaV3_3G035140	protein SLOW GREEN 1, chloroplastic
CsaV3_3G000920	2-keto-3-deoxy-L-rhamnonate aldolase
CsaV3_3G007780	Unknown protein
CsaV3_5G023600	Non-specific lipid-transfer protein-like protein
CsaV3_1G029250	Histone-lysine N-methyltransferase
CsaV3_2G012050	Pectate lyase
CsaV3_5G024310	Transcription repressor KAN1
CsaV3_7G024990	Alcohol dehydrogenase
CsaV3_6G013190	Receptor-like kinase
CsaV3_5G034680	two-component response regulator ORR24-like
CsaV3_3G047250	trihelix transcription factor ASR3
CsaV3_6G050470	MLO-like protein
CsaV3_6G043620	Cytochrome P450
CsaV3_6G001570	L-type lectin-domain containing receptor kinase VIII.1-like
CsaV3_6G040130	Glutamine synthetase
CsaV3_3G022530	CDT1-like protein a, chloroplastic
CsaV3_6G040940	Gb:AAF02129.1, putative
CsaV3_1G026730	Telomere-associated protein rif1
CsaV3_6G023920	Vitellogenin-like protein
CsaV3_5G031400	F-box/kelch protein
CsaV3_4G037920	At4g19430
CsaV3_2G013020	protein WVD2-like 3
CsaV3_1G009460	4-coumarate-CoA ligase
CsaV3_1G013780	homeobox protein BEL1 homolog isoform X1
CsaV3_1G011490	Receptor-like kinase
CsaV3_7G000210	DNA helicase
CsaV3_3G033550	Pyruvate decarboxylase, putative
CsaV3_6G004420	Glutaredoxin family protein, putative
CsaV3_5G024320	Receptor protein kinase
CsaV3_2G015000	Aspartate carbamoyltransferase
CsaV3_1G010870	Abnormal spindle-like microcephaly-associated protein like
CsaV3_5G001570	Glucan endo-1,3-beta-glucosidase, putative
CsaV3_2G019670	Beta-galactosidase
CsaV3_7G007800	endo-1,4-beta-xylanase-like
CsaV3_1G042840	1-acyl-sn-glycerol-3-phosphate acyltransferase 3-like
CsaV3_6G037710	Small ubiquitin-related modifier
CsaV3_3G039490	acanthoscurrin-2-like
CsaV3_6G005180	UPF0496 protein 3-like
CsaV3_2G004270	Serine/threonine-protein kinase
CsaV3_3G035810	BTB/POZ domain-containing protein
CsaV3_7G006470	Receptor protein kinase, putative
CsaV3_3G013890	Protein phosphatase 2c, putative
CsaV3_4G016050	Unknown protein
CsaV3_5G031850	cyclin-D1-1
CsaV3_3G035660	POLAR LOCALIZATION DURING ASYMMETRIC DIVISION AND protein
CsaV3_5G038060	ribonuclease 1-like isoform X2
CsaV3_4G006440	high mobility group B protein 6
CsaV3_1G011630	Receptor protein kinase
CsaV3_1G006900	Alcohol dehydrogenase 7
CsaV3_5G003030	remorin isoform X1
CsaV3_3G027630	Ribonucleoside-diphosphate reductase
CsaV3_1G039050	root phototropism protein 3-like isoform X1
CsaV3_6G037250	Mavicyanin
CsaV3_1G038990	Glycoprotein membrane GPI-anchored protein
CsaV3_6G007770	Receptor-like protein kinase
CsaV3_4G027220	high mobility group B protein 6
CsaV3_4G025700	Class I heat shock protein
CsaV3_1G011730	Wound-responsive family protein
CsaV3_6G033670	14-3-3 protein
CsaV3_6G021880	Retrovirus-related Pol polyprotein from transposon TNT 1-94
CsaV3_2G026300	Gibberellin-regulated protein
CsaV3_3G020650	LOB domain-containing protein 41
CsaV3_2G011470	cytochrome b5-like
CsaV3_1G008850	pachytene checkpoint protein 2 homolog
CsaV3_5G039300	protein NETWORKED 4A
CsaV3_3G017920	Flavin-containing monooxygenase
CsaV3_3G005950	Chlorophyll a-b binding protein, chloroplastic
CsaV3_6G046840	Leucine-rich repeat receptor-like protein kinase family protein
CsaV3_7G025650	Glycine-rich protein
CsaV3_4G010020	O-fucosyltransferase family protein
CsaV3_2G015420	Auxin-responsive protein
CsaV3_7G029050	glutathione S-transferase-like
CsaV3_4G006510	ethylene-responsive transcription factor ERF061
CsaV3_5G031750	Transcription factor
CsaV3_2G001120	guanine nucleotide-binding protein subunit gamma 3-like
CsaV3_1G000750	Fbd-associated f-box protein
CsaV3_4G037480	Glyceraldehyde-3-phosphate dehydrogenase
CsaV3_6G016510	Proliferating cell nuclear antigen
CsaV3_4G010300	Unknown protein
CsaV3_6G031310	integrator complex subunit 6 homolog
CsaV3_6G034520	Adenine nucleotide alpha hydrolases-like superfamily protein
CsaV3_2G014310	Unknown protein
CsaV3_6G036020	microtubule-associated protein TORTIFOLIA1-like
CsaV3_6G002220	WEB family protein isoform X2
CsaV3_1G010280	ankyrin repeat-containing protein At3g12360-like
CsaV3_1G014550	Wall-associated receptor kinase-like
CsaV3_6G040450	Histone-lysine N-methyltransferase SETD1B-like protein
CsaV3_4G001570	EPIDERMAL PATTERNING FACTOR-like protein 8
CsaV3_2G024460	hippocampus abundant transcript 1 protein-like
CsaV3_7G006760	Unknown protein
CsaV3_2G029940	transcription factor bHLH96
CsaV3_7G033530	photosynthetic NDH subunit of subcomplex B 3, chloroplastic
CsaV3_7G028230	Phenazine biosynthesis PhzF protein
CsaV3_1G009540	Argininosuccinate synthase
CsaV3_4G001030	Cellulose synthase
CsaV3_5G008950	Aquaporin
CsaV3_1G039930	Glucan endo-1,3-beta-glucosidase, putative
CsaV3_2G002050	Sugar transport protein
CsaV3_2G002140	Rac-like GTP-binding protein
CsaV3_2G010810	Regulator of chromosome condensation (RCC1) family with FYVE zinc finger domain
CsaV3_1G032100	Unknown protein
CsaV3_3G042910	GDSL esterase/lipase
CsaV3_2G006590	Histone H2A
CsaV3_1G043560	Tubulin beta chain
CsaV3_5G005720	chromosome transmission fidelity protein 8 homolog
CsaV3_4G011800	Fission regulator-like protein
CsaV3_6G046910	Receptor-like protein kinase
CsaV3_3G001980	protein NRT1/ PTR FAMILY 7.3-like
CsaV3_3G004040	Cytoplasmic tRNA 2-thiolation protein 1
CsaV3_4G037650	Cyclin-dependent kinase
CsaV3_4G003130	dCTP pyrophosphatase 1-like
CsaV3_3G037080	IQ domain-containing protein IQM3
CsaV3_3G032570	Aaa-atpase
CsaV3_UNG181390	Receptor kinase-like protein
CsaV3_3G002150	Beta-amylase
CsaV3_3G018900	Pathogenesis-related thaumatin family protein
CsaV3_7G000710	Auxin-responsive family protein
CsaV3_3G021720	Membrane-associated kinase regulator-like protein, putative
CsaV3_2G015520	auxin-responsive protein SAUR21-like
CsaV3_5G003440	Subtilisin-like protease
CsaV3_6G012830	early nodulin-like protein 1
CsaV3_3G011930	Transducin/WD40 repeat-like superfamily protein
CsaV3_2G005240	NPK1-line kinase
CsaV3_6G002240	mini-chromosome maintenance complex-binding protein
CsaV3_3G012480	FHA domain-containing protein At4g14490-like
CsaV3_4G035870	Cyclopropane-fatty-acyl-phospholipid synthase
CsaV3_6G007600	Cytochrome P450
CsaV3_2G024730	RNA polymerases N / 8 kDa subunit
CsaV3_3G020720	Phenolic glucoside malonyltransferase
CsaV3_1G034010	Thaumatin-like protein
CsaV3_6G040960	transcription repressor OFP6
CsaV3_3G037340	Glutaredoxin
CsaV3_2G030920	aquaporin TIP4-1
CsaV3_2G005260	Kinesin-like protein
CsaV3_3G036390	F-box protein CPR30-like
CsaV3_7G023200	S-adenosyl-L-methionine-dependent methyltransferases superfamily protein
CsaV3_3G037320	Alpha carbonic anhydrase
CsaV3_3G034700	Receptor lectin kinase
CsaV3_5G034500	Receptor kinase, putative
CsaV3_1G012440	Squamosa promoter-binding-like protein
CsaV3_1G030890	DUF936 family protein
CsaV3_7G034710	protein IQ-DOMAIN 1-like
CsaV3_1G042350	Enoyl-[acyl-carrier-protein] reductase [NADH]
CsaV3_5G000870	Unknown protein
CsaV3_7G005970	TPR repeat-containing thioredoxin TTL1-like
CsaV3_1G038820	Dormancy/auxin associated protein
CsaV3_6G049320	Cysteine-rich receptor-kinase-like protein
CsaV3_4G023500	Dirigent protein
CsaV3_7G033290	ATP-dependent RNA helicase DDX11-like protein, putative
CsaV3_7G029220	Unknown protein
CsaV3_7G003020	Protein iq-domain 1
CsaV3_4G001680	Delta 9 desaturase
CsaV3_5G031300	Protein of Unknown Function (DUF239)
CsaV3_6G017050	histone H4
CsaV3_UNG002050	Trihelix transcription factor
CsaV3_4G004360	glycine-rich cell wall structural protein 2
CsaV3_3G031130	protein STRUBBELIG-RECEPTOR FAMILY 7 isoform X1
CsaV3_6G045140	Zinc finger homeodomain protein 1
CsaV3_3G037770	Multidrug efflux pump subunit AcrB like
CsaV3_1G001300	Receptor protein kinase, putative
CsaV3_3G031630	polygalacturonase At1g48100
CsaV3_7G029870	BRCT domain-containing protein isoform X1
CsaV3_6G034210	Beta-galactosidase
CsaV3_4G022110	Kinesin-like protein
CsaV3_2G004210	protein ECERIFERUM 26-like
CsaV3_4G008200	E3 ubiquitin-protein ligase CCNB1IP1
CsaV3_2G035100	Syntaxin, putative
CsaV3_3G046980	replication protein A 32 kDa subunit A-like
CsaV3_UNG131030	protein SCAI
CsaV3_2G010280	Chromatin assembly factor 1 subunit fas1
CsaV3_4G027160	Non-specific lipid-transfer protein
CsaV3_5G030540	Abc transporter c family member 3
CsaV3_6G052690	Subtilisin-like protease
CsaV3_4G026940	Protein PLANT CADMIUM RESISTANCE like
CsaV3_3G034950	E3 ubiquitin-protein ligase XB3-like
CsaV3_2G036340	Cytochrome P450, putative
CsaV3_7G000850	Glutamyl-tRNA(Gln) amidotransferase subunit A
CsaV3_1G023060	BPS1-like protein
CsaV3_4G001230	Calcium-dependent phosphotriesterase superfamily protein
CsaV3_2G035150	Peroxidase
CsaV3_5G008690	Class I heat shock protein
CsaV3_3G020460	GDSL esterase/lipase family
CsaV3_5G033170	heparanase-like protein 1
CsaV3_4G031930	Cytochrome b561 domain-containing protein
CsaV3_5G012860	Formin-like protein
CsaV3_1G025480	Photosystem II protein D1
CsaV3_6G035930	Photosystem II reaction center PsbP family protein
CsaV3_4G034840	Cytochrome P450
CsaV3_4G004920	Receptor kinase-like protein
CsaV3_7G001640	Arabidopsis protein of unknown function (DUF241)
CsaV3_5G029070	GEM-like protein 4
CsaV3_3G034520	S-receptor-like serine/threonine-protein kinase
CsaV3_4G004030	leucine-rich repeat receptor-like protein kinase TDR
CsaV3_2G015380	auxin-induced protein 15A
CsaV3_5G038450	TPX2 protein family, putative
CsaV3_6G040540	IQ domain-containing protein IQM3-like
CsaV3_6G007150	dynamin-like protein
CsaV3_6G043310	Lipase
CsaV3_4G037390	Fanconi anemia group J protein
CsaV3_6G033610	protein KTI12 homolog
CsaV3_6G047330	DUF630 family protein
CsaV3_2G018180	Pectinesterase
CsaV3_1G011520	Receptor protein kinase
CsaV3_3G004090	leucine-rich repeat extensin-like protein 5
CsaV3_3G014990	Nutrient reservoir
CsaV3_1G006520	protein ASPARTIC PROTEASE IN GUARD CELL 1-like
CsaV3_1G004350	Auxin efflux carrier component
CsaV3_6G018880	Unknown protein
CsaV3_6G031670	Protein of unknown function (DUF630 and DUF632)
CsaV3_6G034290	Kinesin-like protein
CsaV3_1G036250	Omega-3 fatty acid desaturase
CsaV3_7G021510	kinesin KP1
CsaV3_1G039880	Pectinesterase
CsaV3_6G037010	LRR receptor-like serine/threonine-protein kinase
CsaV3_6G007010	Trigger factor
CsaV3_7G033280	Kinesin-like protein
CsaV3_5G008960	Aquaporin
CsaV3_6G014230	heavy metal-associated isoprenylated plant protein 3-like
CsaV3_3G021790	Unknown protein
CsaV3_1G007160	Auxin efflux carrier component
CsaV3_UNG088690	condensin-2 complex subunit D3
CsaV3_1G009300	30S ribosomal protein S21
CsaV3_3G034380	DUF3527 domain protein
CsaV3_7G023020	Cyclin
CsaV3_7G002960	Glycine rich protein
CsaV3_1G036320	Protein trichome birefringence-like
CsaV3_2G031100	hemoglobin 3
CsaV3_3G026360	BRO1 domain containing protein
CsaV3_1G002420	Expansin
CsaV3_5G008780	Class I heat shock protein
CsaV3_6G001730	Histone-lysine N-methyltransferase
CsaV3_1G005310	Microtubule-associated protein RP/EB
CsaV3_6G014940	Fatty acyl-CoA reductase
CsaV3_4G026100	Chlorophyll a-b binding protein, chloroplastic
CsaV3_4G024400	thioredoxin-like protein AAED1, chloroplastic
CsaV3_5G013080	40S ribosomal protein S5-like
CsaV3_6G042830	B3 domain-containing transcription factor VRN1-like
CsaV3_1G007950	Receptor-like protein kinase
CsaV3_3G026500	DNA topoisomerase 2-binding protein 1
CsaV3_1G011900	CTTNBP 2 amino-terminal-like protein
CsaV3_3G046800	DUF581 domain-containing protein
CsaV3_6G016090	Asparagine synthetase
CsaV3_5G004390	DNA mismatch repair protein MutS
CsaV3_6G041830	protein TONSOKU isoform X1
CsaV3_6G045560	Trehalose 6-phosphate phosphatase
CsaV3_3G019230	MLO-like protein
CsaV3_6G040550	subtilisin-like protease SBT4.15
CsaV3_6G040640	protein TERMINAL FLOWER 1-like
CsaV3_4G003610	disease resistance protein RGA2-like
CsaV3_7G006190	AP180 N-terminal domain containing protein
CsaV3_4G023750	Enoyl-[acyl-carrier-protein] reductase [NADH]
CsaV3_1G004510	Kinesin-like protein
CsaV3_3G004370	RNA polymerase II elongation factor ELL3 isoform 1
CsaV3_4G032980	IRK-interacting protein-like
CsaV3_4G033850	Stem-specific protein TSJT1
CsaV3_4G026200	Auxin transporter-like protein
CsaV3_2G016620	Mads box protein
CsaV3_2G028630	deoxyuridine 5'-triphosphate nucleotidohydrolase
CsaV3_5G024170	GAST1 protein homolog 5
CsaV3_6G000240	Non-specific serine/threonine protein kinase
CsaV3_6G006100	Fasciclin-like arabinogalactan protein
CsaV3_1G003250	Wd repeat and hmg-box dna-binding protein 1
CsaV3_3G032440	Hsp90 co-chaperone Cdc37, N-terminally processed like
CsaV3_3G045010	DNA ligase-like protein
CsaV3_1G002860	PLASMODESMATA CALLOSE-BINDING PROTEIN 3
CsaV3_4G006010	Receptor kinase, putative
CsaV3_5G015450	BAG family molecular chaperone regulator 1-like
CsaV3_2G027800	Thioredoxin
CsaV3_4G024580	Membrane-associated kinase regulator 4
CsaV3_5G029770	60S ribosomal protein L3
CsaV3_4G007910	anaphase-promoting complex subunit 5
CsaV3_2G024570	DUF936 family protein
CsaV3_3G047980	Chromosome-associated kinesin KIF4A
CsaV3_1G044390	Unknown protein
CsaV3_1G006860	Unknown protein
CsaV3_4G028430	DIS3-like exonuclease 2
CsaV3_1G037290	LRR receptor-like kinase family protein
CsaV3_2G026020	At4g33800-like protein
CsaV3_2G012240	multiple inositol polyphosphate phosphatase 1-like
CsaV3_7G035190	Receptor-like protein kinase
CsaV3_6G018950	Cation/H(+) antiporter like
CsaV3_UNG208960	30S ribosomal protein S7, chloroplastic
CsaV3_3G048260	Transcription factor bhlh93
CsaV3_2G017140	Synechocystis YCF37-like protein
CsaV3_3G013840	Glutamine synthetase
CsaV3_2G031650	photosynthetic NDH subunit of subcomplex B 3, chloroplastic
CsaV3_3G006060	CHD3-type chromatin-remodeling factor PICKLE like
CsaV3_6G004380	transcription repressor OFP13-like
CsaV3_3G036750	Peroxiredoxin, putative
CsaV3_1G036950	BAG family molecular chaperone regulator 3-like
CsaV3_2G009520	TPR repeat-containing protein ZIP4
CsaV3_7G035390	GATA transcription factor
CsaV3_5G033750	Protein of unknown function (DUF1262)
CsaV3_4G024680	Kinesin-like protein
CsaV3_6G031520	FACT complex subunit like
CsaV3_2G024590	polygalacturonase-1 non-catalytic subunit beta-like
CsaV3_5G002720	Signal peptide peptidase-like
CsaV3_2G019810	Defensin-like protein
CsaV3_4G024610	Exocyst subunit Exo70 family protein
CsaV3_6G008170	DNA primase large subunit
CsaV3_1G007270	Receptor-like kinase 1
CsaV3_3G031860	acyl-CoA--sterol O-acyltransferase 1-like
CsaV3_1G005210	DHHA1 domain protein
CsaV3_4G009610	Unknown protein
CsaV3_3G021710	Reticulon-like protein
CsaV3_3G045760	Endoglucanase
CsaV3_5G037310	NHL domain protein
CsaV3_3G038440	Protein downstream neighbor of son like
CsaV3_7G007140	Cysteine proteinase inhibitor
CsaV3_7G034230	zinc finger CCCH domain-containing protein 62-like
CsaV3_3G018310	Leucine-rich repeat (LRR) family protein
CsaV3_1G043670	Glucan endo-1,3-beta-glucosidase
CsaV3_7G030940	DNA-directed RNA polymerase II subunit RPB11
CsaV3_3G008090	Ring finger protein, putative
CsaV3_1G001620	Spermidine synthase
CsaV3_5G031840	Unknown protein
CsaV3_6G035550	lysM domain-containing GPI-anchored protein 1
CsaV3_5G029050	GEM-like protein 4
CsaV3_3G048770	Unknown protein
CsaV3_4G033030	Dna polymerase delta subunit 3
CsaV3_5G034490	Receptor kinase, putative
CsaV3_5G028310	HMG-Y-related protein A
CsaV3_3G044720	Cytochrome P450
CsaV3_2G026310	Cytochrome P450, putative
CsaV3_6G039130	Ubiquitin-conjugating enzyme E2
CsaV3_3G021590	Fructokinase-2
CsaV3_4G037720	Mitotic checkpoint serine/threonine-protein kinase BUB1
CsaV3_UNG209720	Unknown protein
CsaV3_UNG203700	ATP synthase subunit beta, chloroplastic
CsaV3_1G012750	hydrolase family protein / HAD-superfamily protein
CsaV3_3G031000	DNA binding protein
CsaV3_4G010510	Unknown protein
CsaV3_2G018310	cation/H(+) antiporter 15
CsaV3_6G043490	UPF0481 protein At3g47200
CsaV3_6G008450	Metallophosphoesterase domain-containing protein
CsaV3_7G003810	Cysteine rich receptor like kinase
CsaV3_5G033280	Unknown protein
CsaV3_3G006070	Peptidyl-prolyl cis-trans isomerase, putative
CsaV3_5G000750	Unknown protein
CsaV3_3G041590	3-dehydroquinate synthase homolog
CsaV3_3G050010	Proteinase inhibitor
CsaV3_3G009520	serine/threonine-protein kinase Aurora-3
CsaV3_5G001270	Phospholipase-like protein
CsaV3_7G007040	root phototropism protein 3
CsaV3_6G036750	Ankyrin repeat-containing protein
CsaV3_1G014240	Late embryogenesis abundant protein
CsaV3_5G028270	Endoglucanase
CsaV3_5G030760	ABC transporter B family protein
CsaV3_2G012640	kinesin-like protein KIF22
CsaV3_6G037970	Inter-alpha-trypsin inhibitor heavy chain like
CsaV3_6G040100	Aquaporin
CsaV3_4G010610	Polygalacturonase inhibitor
CsaV3_1G004560	Strictosidine synthase
CsaV3_3G023120	protein NDR1-like
CsaV3_5G029950	Basic-leucine zipper domain protein
CsaV3_1G003810	LOB domain-containing protein 41-like
CsaV3_3G003810	NB-ARC domain-containing disease resistance protein
CsaV3_1G045360	Glycosyltransferase
CsaV3_5G006380	50S ribosomal protein L10
CsaV3_6G028480	protein REDUCED WALL ACETYLATION 1-like
CsaV3_2G035020	Glutamate receptor
CsaV3_1G038870	Formin-like protein
CsaV3_4G025710	Unknown protein
CsaV3_1G033170	Pentatricopeptide repeat-containing protein
CsaV3_1G039950	leucine-rich repeat extensin-like protein 4
CsaV3_1G000220	CASP-like protein
CsaV3_7G027760	Type I inositol polyphosphate 5-phosphatase, putative
CsaV3_4G025990	mitogen-activated protein kinase-binding protein 1 isoform X2
CsaV3_4G000030	histone acetyltransferase KAT6B-like
CsaV3_5G010070	Cytochrome P450
CsaV3_3G040990	lamin-like protein
CsaV3_7G008640	Leucine-rich repeat family protein / protein kinase family protein
CsaV3_1G045810	Unknown protein
CsaV3_4G011750	leucine-rich repeat receptor-like tyrosine-protein kinase PXC3
CsaV3_4G035980	Mechanosensitive ion channel protein
CsaV3_1G032300	Alpha/beta hydrolase family protein
CsaV3_3G037150	protein LITTLE ZIPPER 4
CsaV3_6G038710	Cyclin
CsaV3_1G006150	DNA polymerase alpha subunit B
CsaV3_2G016060	Protein mcm10 like
CsaV3_7G023230	Lysocardiolipin acyltransferase 1
CsaV3_3G014080	serine/threonine-protein kinase RUNKEL
CsaV3_6G050790	protein CHUP1, chloroplastic
CsaV3_6G017040	histone H4
CsaV3_2G016420	Cyclin delta-3, putative
CsaV3_3G018610	Ferredoxin--nitrite reductase
CsaV3_3G037190	Terminal flower 1-like protein
CsaV3_1G031650	AP2-like ethylene-responsive transcription factor
CsaV3_6G045550	lipoxygenase homology domain-containing protein 1-like
CsaV3_1G008990	Cytochrome P450
CsaV3_2G032480	Eukaryotic translation initiation factor 5A
CsaV3_6G002280	Expansin
CsaV3_3G015040	MYB transcription factor
CsaV3_5G003700	Ribonuclease H-like domain containing protein
CsaV3_7G003180	O-methyltransferase
CsaV3_1G014090	Histone H2B
CsaV3_5G033120	DUF538 family protein
CsaV3_5G033680	Unknown protein
CsaV3_6G008180	squamosa promoter-binding-like protein 16
CsaV3_7G027570	phospholipase A1-Igamma2, chloroplastic
CsaV3_5G001420	Alpha-l-fucosidase, putative
CsaV3_2G015560	auxin-responsive protein SAUR21-like
CsaV3_7G029040	Glutathione S-transferase
CsaV3_4G030020	NADP-dependent sorbitol-6-phosphate dehydrogenase
CsaV3_3G030550	UDP-glycosyltransferase 89A2-like
CsaV3_6G000540	2-oxoglutarate (2OG) and Fe(II)-dependent oxygenase superfamily protein
CsaV3_5G005980	aspartyl protease family protein 2
CsaV3_2G026510	WUSCHEL-related homeobox 4
CsaV3_7G029170	ABC transporter C family member 4-like
CsaV3_6G040970	Lipid droplet-associated hydrolase
CsaV3_1G001340	Sec14p-like phosphatidylinositol transfer family protein
CsaV3_4G000620	Potassium transporter
CsaV3_4G006180	Membrane-associated kinase regulator
CsaV3_7G032820	Molybdate transporter like
CsaV3_3G014170	CASP-like protein
CsaV3_1G042620	Transducin/WD40 repeat-like superfamily protein
CsaV3_4G001660	Fatty acid desaturase
CsaV3_1G010250	Ankyrin repeat-containing protein
CsaV3_4G006590	Deoxyhypusine synthase
CsaV3_3G002880	14 kDa proline-rich protein DC2.15-like
CsaV3_3G019930	Calcineurin B-like protein
CsaV3_3G013420	Photosystem I reaction center subunit II like
CsaV3_1G042030	Non-specific lipid-transfer protein-like protein
CsaV3_4G035620	Unknown protein
CsaV3_3G046180	SAWADEE domain containing protein
CsaV3_6G042170	TSL-kinase interacting protein 1 isoform X1
CsaV3_2G028920	Cytochrome P450, putative
CsaV3_6G037130	Heat-inducible transcription repressor
CsaV3_7G022880	Peroxidase
CsaV3_4G000630	ABC transporter substrate-binding protein
CsaV3_6G037630	Unknown protein
CsaV3_5G000620	Abscisic acid receptor like
CsaV3_1G008710	Receptor-like protein kinase
CsaV3_7G035050	11S seed storage globulin
CsaV3_1G005200	NAC domain containing protein
CsaV3_6G036520	protein ENHANCED DISEASE RESISTANCE 2-like isoform X1
CsaV3_2G012430	Cysteine-rich repeat secretory protein like
CsaV3_4G031720	Magnesium-protoporphyrin IX monomethyl ester [oxidative] cyclase
CsaV3_6G003070	protein PRD1 isoform X1
CsaV3_4G023300	Glucan endo-1,3-beta-glucosidase
CsaV3_1G036190	O-glucosyltransferase rumi homolog
CsaV3_6G030970	Carboxypeptidase
CsaV3_5G001860	Gdsl esterase/lipase
CsaV3_5G003850	Cytochrome P450, putative
CsaV3_1G010380	ankyrin repeat-containing protein At5g02620-like
CsaV3_6G043110	Short-chain dehydrogenase/reductase
CsaV3_3G003180	Leucine rich repeat receptor kinase
CsaV3_4G000740	Lycopene beta-cyclase
CsaV3_2G007720	DUF594 family protein
CsaV3_1G009430	Amino acid transporter, transmembrane
CsaV3_5G000740	Protein kinase domain
CsaV3_6G007160	Tetratricopeptide repeat (TPR)-like superfamily protein
CsaV3_7G030290	Polygalacturonase
CsaV3_5G024410	protease Do-like 8, chloroplastic
CsaV3_5G031360	Polygalacturonase, putative
CsaV3_5G030270	Chlorophyll a-b binding protein, chloroplastic
CsaV3_4G007360	Cytochrome b6
CsaV3_6G015040	Poly [ADP-ribose] polymerase
CsaV3_2G033830	L-Ala-D/L-amino acid epimerase-like
CsaV3_6G051670	Cytochrome P450
CsaV3_6G046760	Beta-galactosidase
CsaV3_4G002350	Carboxypeptidase
CsaV3_3G004460	kinesin-like protein KIN12B
CsaV3_2G029970	Protein DETOXIFICATION
CsaV3_1G000690	Adenylate kinase family protein
CsaV3_4G001670	palmitoyl-monogalactosyldiacylglycerol delta-7 desaturase, chloroplastic-like
CsaV3_7G025730	LRR receptor-like kinase
CsaV3_6G032000	protein BIG GRAIN 1-like A
CsaV3_2G010560	Glutamine--fructose-6-phosphate aminotransferase [isomerizing]
CsaV3_7G021570	Cellulose synthase, putative
CsaV3_6G001490	Rop guanine nucleotide exchange factor, putative
CsaV3_5G026130	Dirigent protein
CsaV3_2G026620	Remorin
CsaV3_4G017420	Zeaxanthin epoxidase, chloroplastic
CsaV3_6G014760	Arogenate dehydratase
CsaV3_2G007470	Purine permease
CsaV3_4G035230	Basic-leucine zipper transcription factor
CsaV3_3G014190	transcription factor bHLH95-like
CsaV3_1G001050	Protein DETOXIFICATION
CsaV3_2G028450	Unknown protein
CsaV3_5G024900	Alpha-mannosidase
CsaV3_6G001110	ankyrin-3
CsaV3_4G012040	Protein kinase
CsaV3_5G033300	Ureide permease
CsaV3_2G008030	MYB transcription factor
CsaV3_4G033550	Membrane-associated kinase regulator
CsaV3_6G009240	PLATZ transcription factor family protein
CsaV3_5G040230	Lipid phosphate phosphatase 2
CsaV3_3G008240	Extra-large G-like protein
CsaV3_7G004000	5' exonuclease Apollo
CsaV3_6G005680	classical arabinogalactan protein 25
CsaV3_4G005400	Beta-galactosidase
CsaV3_UNG208970	NAD(P)H-quinone oxidoreductase subunit 2, chloroplastic
CsaV3_6G049370	Cysteine rich receptor like kinase
CsaV3_6G045360	Monoacylglycerol lipase ABHD6
CsaV3_3G044120	transcription factor bHLH87-like
CsaV3_6G001830	DNA replication complex GINS protein PSF3-like
CsaV3_4G003380	protein FAR1-RELATED SEQUENCE 5-like
CsaV3_4G033840	CBS domain-containing protein CBSX5
CsaV3_2G002320	DNA mismatch repair protein MutS
CsaV3_4G023530	Unknown protein
CsaV3_4G025850	Kinase family protein
CsaV3_1G007410	Zinc finger homeodomain protein
CsaV3_2G010960	Mechanosensitive ion channel protein
CsaV3_6G041490	Unknown protein
CsaV3_6G042950	Salicylic acid-binding protein 2
CsaV3_3G035820	Cytokinin riboside 5'-monophosphate phosphoribohydrolase
CsaV3_5G038140	Expansin
CsaV3_3G021930	Unknown protein
CsaV3_2G008610	Unknown protein
CsaV3_6G014170	SNF1-related protein kinase regulatory subunit beta
CsaV3_4G013310	ARM repeat superfamily protein
CsaV3_6G031530	1,4-alpha-glucan-branching enzyme
CsaV3_3G040530	Ankyrin repeat containing protein
CsaV3_1G011090	Late embryogenesis abundant protein
CsaV3_3G016350	65-kDa microtubule-associated protein 3-like
CsaV3_1G004550	Beta-glucosidase
CsaV3_UNG113880	DNA topoisomerase 2-binding protein 1 isoform X3
CsaV3_5G004010	DNA-binding WRKY
CsaV3_6G047320	Ascorbate peroxidase
CsaV3_4G008840	Alpha-1,4 glucan phosphorylase
CsaV3_1G035870	RING/FYVE/PHD zinc finger protein
CsaV3_5G003330	UDP-4-keto-6-deoxy-D-glucose 3,5-epimerase/UDP-4-keto-L-rhamnose 4-keto-reductase
CsaV3_2G029110	thioredoxin H1-like
CsaV3_3G013080	Type I inositol polyphosphate 5-phosphatase, putative
CsaV3_3G042990	Gibberellin regulated protein
CsaV3_4G034070	Peptidase
CsaV3_3G049400	Cytochrome P450
CsaV3_2G006500	Always early, putative isoform 3
CsaV3_6G002180	LOB domain-containing protein 15-like
CsaV3_6G012500	Micronuclear linker histone polyprotein-like protein
CsaV3_7G024210	FHA domain-containing protein PS1
CsaV3_1G001960	transcription factor bHLH79
CsaV3_1G007730	2-oxoglutarate-dependent dioxygenase
CsaV3_2G032190	14 kDa proline-rich protein dc2.15
CsaV3_5G028190	Glucan endo-1,3-beta-glucosidase, putative
CsaV3_4G005090	Cytochrome P450
CsaV3_7G033590	Terpene cyclase/mutase family member
CsaV3_6G039060	Pentatricopeptide repeat-containing protein
CsaV3_5G002080	Pectin lyase-like superfamily protein
CsaV3_3G002570	ethylene-responsive transcription factor ERF039
CsaV3_5G029630	protein MIZU-KUSSEI 1
CsaV3_1G003580	Transmembrane protein
CsaV3_3G034910	Kinesin-like protein
CsaV3_3G045560	WAT1-related protein
CsaV3_1G000260	NAC domain-containing protein 83-like
CsaV3_6G006740	Fructokinase-2
CsaV3_2G034670	Condensin complex subunit 2
CsaV3_2G030260	kinesin-like protein KIN-4C
CsaV3_1G008950	Cytochrome P450
CsaV3_6G002190	histone H4
CsaV3_2G014660	Glucan endo-1,3-beta-glucosidase, putative
CsaV3_3G045690	Auxin response factor
CsaV3_7G000440	NADP-dependent sorbitol-6-phosphate dehydrogenase
CsaV3_4G026730	Patellin-6
CsaV3_3G021940	kinetochore protein NDC80 homolog
CsaV3_7G033300	ATP-dependent DNA helicase chl1
CsaV3_1G013340	Shugoshin-1, putative
CsaV3_3G016880	stamen-specific protein FIL1-like
CsaV3_3G006600	Core-2/I-branching beta-1,6-N-acetylglucosaminyltransferase family protein
CsaV3_3G049230	AT-hook motif nuclear-localized protein 13-like
CsaV3_4G005100	Lymphoid-specific helicase
CsaV3_1G009660	deoxycytidylate deaminase
CsaV3_3G033010	DUF599 domain-containing protein
CsaV3_3G007560	Homeobox-leucine zipper protein
CsaV3_1G038010	serine/threonine-protein kinase haspin
CsaV3_3G002370	Unknown protein
CsaV3_2G009140	2-oxoglutarate (2OG) and Fe(II)-dependent oxygenase superfamily protein
CsaV3_6G042990	Dof zinc finger protein
CsaV3_3G040410	Glutaredoxin family protein, putative
CsaV3_1G037390	Cationic amino acid transporter like
CsaV3_2G028270	Dof zinc finger protein like
CsaV3_3G031450	Oligopeptide transporter
CsaV3_7G027970	Flocculation FLO11-like protein
CsaV3_2G030520	Zinc finger (C3HC4-type RING finger) family protein
CsaV3_3G003120	HAT transposon superfamily
CsaV3_5G005270	DUF1218 domain-containing protein
CsaV3_3G021780	Pyruvate kinase
CsaV3_3G048900	Homeobox leucine zipper protein
CsaV3_2G032370	Ethylene-responsive transcription factor
CsaV3_6G016270	villin-1
CsaV3_6G038610	CSL zinc finger protein
CsaV3_6G045630	Inositol-3-phosphate synthase 1
CsaV3_4G001350	GDSL esterase/lipase
CsaV3_1G000450	squamosa promoter-binding-like protein 13A
CsaV3_7G028730	CASP-like protein
CsaV3_7G030520	Unknown protein
CsaV3_6G046420	auxilin-like protein 1 isoform X2
CsaV3_1G010780	Peroxidase
CsaV3_5G012920	Cystatin/monellin superfamily protein
CsaV3_6G043180	Sulfotransferase
CsaV3_7G028390	Histone H2A
CsaV3_3G015690	50S ribosomal protein L18
CsaV3_4G005530	tRNA-methyltransferase non-catalytic subunit trm6MTase subunit
CsaV3_7G030530	delta(24)-sterol reductase
CsaV3_3G011330	Holliday junction resolvase
CsaV3_6G022220	Histone H2A
CsaV3_5G004810	protein NRT1/ PTR FAMILY 5.10-like
CsaV3_3G010280	sister chromatid cohesion protein DCC1
CsaV3_3G022640	DUF538 family protein
CsaV3_3G006290	3-deoxy-manno-octulosonate cytidylyltransferase
CsaV3_7G005590	Histone-lysine N-methyltransferase
CsaV3_2G004820	Prefoldin chaperone subunit family protein
CsaV3_4G000150	Nucleobase-ascorbate transporter
CsaV3_1G034040	2-dehydro-3-deoxyphosphooctonate aldolase
CsaV3_3G036300	Glycosyltransferase
CsaV3_2G021050	Enabled-like protein (DUF1635)
CsaV3_7G026580	Peptidylprolyl isomerase
CsaV3_3G000770	Ferredoxin--NADP reductase
CsaV3_3G047200	Xyloglucan glycosyltransferase
CsaV3_3G013730	RING zinc finger protein
CsaV3_5G025100	Isopentenyl phosphate kinase
CsaV3_4G025160	thaumatin-like protein
CsaV3_2G015370	Auxin-responsive protein
CsaV3_2G032490	BTB/POZ domain-containing protein
CsaV3_6G008350	protein CURVATURE THYLAKOID 1B, chloroplastic
CsaV3_3G011110	F-box protein PP2
CsaV3_1G017220	Blue copper protein
CsaV3_3G010710	Unknown protein
CsaV3_6G052510	fatty acid hydroxylase 2
CsaV3_3G042150	WAT1-related protein
CsaV3_1G007660	Ser/thr phosphatase family protein
CsaV3_UNG208980	NAD(P)H-quinone oxidoreductase subunit 2, chloroplastic
CsaV3_1G002050	protein NUCLEAR FUSION DEFECTIVE 4
CsaV3_3G028560	Ribokinase, Carbohydrate kinase PfkB, Ribokinase-like protein
CsaV3_4G031320	Multiple C2 and transmembrane domain-containing protein 1
CsaV3_3G011660	RNA-binding family protein
CsaV3_3G000930	Early nodulin-like protein 1
CsaV3_4G005390	Beta-galactosidase
CsaV3_5G012950	BnaC09g20880D protein
CsaV3_3G002170	Novel plant snare, putative
CsaV3_3G012420	serine/threonine-protein kinase BLUS1
CsaV3_1G017010	Two-component response regulator-like protein APRR2
CsaV3_3G022040	Unknown protein
CsaV3_3G048610	Glycosyltransferases
CsaV3_3G034760	Heat shock protein DnaJ, cysteine-rich domain-containing protein
CsaV3_6G002340	Receptor-like protein kinase
CsaV3_2G013800	protein LONGIFOLIA 1
CsaV3_6G036560	Adenosine kinase
CsaV3_3G040770	Nucleotide-sugar transporter family protein
CsaV3_7G022610	glucan endo-1,3-beta-glucosidase 3-like
CsaV3_1G000520	Nuclear transcription factor Y subunit C
CsaV3_3G003550	DUF810 domain-containing protein
CsaV3_3G012000	Unknown protein
CsaV3_5G002210	ethylene-responsive transcription factor CRF2-like
CsaV3_3G019060	glutelin type-A 2-like
CsaV3_6G009940	phototropin-2
CsaV3_3G033720	Calcium-dependent protein kinase
CsaV3_3G006750	protein STICHEL
CsaV3_7G024890	Carboxypeptidase
CsaV3_3G014780	RING-type E3 ubiquitin transferase
CsaV3_6G046560	TIM-barrel signal transduction protein
CsaV3_3G032750	lamin-like protein
CsaV3_1G033160	receptor-like protein 51
CsaV3_5G015440	Homeobox associated leucine zipper protein
CsaV3_7G030320	short-chain dehydrogenase reductase 3b-like
CsaV3_1G003130	protein MIS12 homolog
CsaV3_5G037760	Prolyl 4-hydroxylase alpha subunit
CsaV3_4G033600	Protein DETOXIFICATION
CsaV3_1G011990	Hydroxyproline-rich glycoprotein family protein
CsaV3_5G035160	EEIG1/EHBP1 N-terminal domain
CsaV3_6G021760	Voltage-dependent T-type calcium channel subunit alpha-1I (Ca(V)3.3) like
CsaV3_4G000300	Trypsin inhibitor 1
CsaV3_2G021070	Pectate lyase
CsaV3_3G036350	Glycosyltransferase
CsaV3_5G003870	Dimethylallyl, adenosine tRNA methylthiotransferase
CsaV3_3G016040	Receptor protein kinase, putative
CsaV3_6G008830	protein AIG1-like
CsaV3_7G031110	E3 ubiquitin ligase BIG BROTHER like
CsaV3_6G052640	protein CHUP1, chloroplastic-like
CsaV3_5G031000	GDSL esterase/lipase
CsaV3_1G030980	transcriptional corepressor LEUNIG-like isoform X1
CsaV3_1G002190	microtubule-associated protein futsch-like isoform X2
CsaV3_6G041820	Protein IDA-LIKE 2
CsaV3_5G038010	Mini zinc finger protein
CsaV3_1G007170	Protein C2-DOMAIN ABA-RELATED like
CsaV3_6G039200	ABC transporter G family member
CsaV3_6G038360	Rho GTPase-activating protein
CsaV3_3G013320	Ferredoxin
CsaV3_6G041930	WAT1-related protein
CsaV3_1G012840	histone H4
CsaV3_1G032200	Glycogen debranching enzyme
CsaV3_6G014120	Otu domain-containing protein
CsaV3_5G013990	DNA (cytosine-5)-methyltransferase
CsaV3_4G035090	LIM domain-containing protein
CsaV3_5G034550	Receptor-like protein kinase
CsaV3_3G011080	plastid transcriptionally active 5
CsaV3_3G049050	transcription factor bHLH71
CsaV3_3G017030	pentatricopeptide repeat-containing protein At3g29230-like
CsaV3_5G030550	mitotic spindle checkpoint protein MAD2
CsaV3_3G032480	homeobox-leucine zipper protein HOX11-like
CsaV3_6G052280	187-kDa microtubule-associated protein AIR9
CsaV3_5G039120	DNA-directed RNA polymerase II subunit like
CsaV3_6G021550	Interactor of constitutive active ROPs
CsaV3_3G040500	5-methyltetrahydropteroyltriglutamate-- homocysteine methyltransferase
CsaV3_4G034710	cyclin-D3-3-like
CsaV3_1G032450	Binding protein
CsaV3_3G046660	cyclin-A2-1 isoform X2
CsaV3_3G007120	Steroid 5-alpha reductase family protein
CsaV3_5G027140	cyclin-dependent protein kinase inhibitor SMR3
CsaV3_7G024790	Regulator of chromosome condensation (RCC1) family with FYVE zinc finger domain
CsaV3_2G017270	CDPK-related kinase 5
CsaV3_4G012030	Cell cycle checkpoint protein RAD1
CsaV3_6G036770	Ankyrin repeat-containing protein, putative
CsaV3_3G021760	S-receptor-like serine/threonine-protein kinase
CsaV3_3G004010	caffeic acid 3-O-methyltransferase-like
CsaV3_6G052990	Phosphatidate cytidylyltransferase, mitochondrial
CsaV3_3G045500	Beta-galactosidase
CsaV3_6G048930	Myb family transcription factor
CsaV3_6G048100	DUF2431 domain-containing protein
CsaV3_1G031050	Protein argonaute like
CsaV3_1G000070	transducin family protein / WD-40 repeat family protein
CsaV3_1G003390	Alpha-1,4-glucan-protein synthase [UDP-forming], putative
CsaV3_7G026980	Myosin
CsaV3_2G003770	Unknown protein
CsaV3_5G025190	Ankyrin repeat-containing protein family
CsaV3_2G018300	Callose synthase
CsaV3_1G006910	Reticulon-like protein
CsaV3_UNG207830	ATP synthase subunit a, chloroplastic
CsaV3_3G041190	DUF1997 family protein
CsaV3_UNG210030	Unknown protein
CsaV3_3G037970	aluminum-activated malate transporter 8-like
CsaV3_5G030500	DNA helicase, ATP-dependent
CsaV3_1G040370	Cytoplasmic FMR1-interacting protein
CsaV3_7G001680	Arabidopsis protein of unknown function (DUF241)
CsaV3_2G029150	Purple acid phosphatase
CsaV3_5G034290	Histone-lysine N-methyltransferase
CsaV3_4G001630	palmitoyl-monogalactosyldiacylglycerol delta-7 desaturase, chloroplastic-like
CsaV3_2G004160	light-inducible protein CPRF2-like
CsaV3_3G046150	Plastocyanin
CsaV3_1G006370	calcium sensing receptor, chloroplastic
CsaV3_2G001760	acid phosphatase 1-like
CsaV3_3G011280	Pectate lyase
CsaV3_4G004750	Trehalose 6-phosphate phosphatase
CsaV3_3G039670	MYB transcription factor
CsaV3_5G002050	Endoglucanase
CsaV3_5G011260	SAM dependent carboxyl methyltransferase
CsaV3_6G031640	DUF241 domain-containing protein
CsaV3_5G001840	UDP-glucose 4-epimerase
CsaV3_4G004160	Kinase-like protein
CsaV3_3G023520	LOW QUALITY PROTEIN: protein IQ-DOMAIN 14-like
CsaV3_7G008160	Glycosyltransferase
CsaV3_7G028680	Phenazine biosynthesis PhzF protein
CsaV3_1G036220	GPCR kinase
CsaV3_7G033060	thionin-like protein 2
CsaV3_6G043280	Remorin like
CsaV3_6G051070	IRK-interacting protein
CsaV3_6G004480	Protein kinase
CsaV3_3G028350	cysteine-rich repeat secretory protein 56
CsaV3_4G027600	Nucleic acid-binding, OB-fold containing protein
CsaV3_6G039330	Calcium-dependent protein kinase
CsaV3_5G027630	Structural maintenance of chromosomes protein
CsaV3_3G037720	transcription repressor OFP6-like
CsaV3_7G006600	Glycosyltransferase
CsaV3_5G025740	Chlorophyll a-b binding protein, chloroplastic
CsaV3_3G036700	leucine-rich repeat receptor-like protein kinase PXC1
CsaV3_6G041600	photosystem I reaction center subunit N, chloroplastic
CsaV3_2G002850	Methyltransferase FkbM
CsaV3_6G007230	Flavin-containing monooxygenase
CsaV3_1G029200	50S ribosomal protein L35
CsaV3_6G009950	Unknown protein
CsaV3_2G001730	leucine-rich repeat extensin-like protein 4
CsaV3_1G005500	Exostosin-like
CsaV3_6G040000	Pectate lyase
CsaV3_7G011310	Fasciclin-like arabinogalactan protein
CsaV3_5G024060	serine/threonine-protein kinase CDL1-like
CsaV3_4G005880	Beta-1,3-N-acetylglucosaminyltransferase lunatic fringe
CsaV3_1G012600	Receptor-like protein kinase
CsaV3_2G031830	Protein of unknown function, DUF642
CsaV3_5G003970	Acid beta-fructofuranosidase, putative
CsaV3_3G035520	DNA replication licensing factor MCM8
CsaV3_5G035680	GABA transporter 1-like
CsaV3_7G025320	Histone H3 like protein
CsaV3_5G032120	Hydroxyproline O-galactosyltransferase
CsaV3_4G028790	delta(7)-sterol-C5(6)-desaturase-like
CsaV3_5G001430	Glycine--tRNA ligase beta subunit
CsaV3_3G047260	Gamma-glutamylcyclotransferase
CsaV3_6G006870	Natterin-3 like
CsaV3_6G009970	Cysteine/Histidine-rich C1 domain family protein
CsaV3_1G031010	Protein kinase
CsaV3_5G004730	Kinesin-like protein
CsaV3_1G023070	Unknown protein
CsaV3_5G034990	Required for excision 1-B domain-containing
CsaV3_4G024380	Pentatricopeptide repeat-containing protein
CsaV3_3G036520	Caffeic acid O-methyltransferase
CsaV3_3G005310	early nodulin-like protein 3
CsaV3_5G029330	Gdsl esterase/lipase
CsaV3_3G035670	Protamine P1 family protein
CsaV3_1G037750	Ribose-5-phosphate isomerase A
CsaV3_1G008440	Tyrosine kinase
CsaV3_1G005650	galactoside 2-alpha-L-fucosyltransferase-like
CsaV3_1G043400	AT-hook motif nuclear-localized protein
CsaV3_2G035490	Receptor-like protein kinase, putative
CsaV3_3G008150	chitinase domain-containing protein 1
CsaV3_3G019560	LOW QUALITY PROTEIN: uncharacterized protein LOC103496210
CsaV3_4G001600	Glucan endo-1,3-beta-glucosidase
CsaV3_4G000520	Gibberellin-regulated protein
CsaV3_3G046240	synaptotagmin-4-like
CsaV3_4G032050	ATP-binding protein
CsaV3_3G037590	Golgin family A protein
CsaV3_5G005880	BAG family molecular chaperone regulator like
CsaV3_5G026530	dof zinc finger protein DOF2.4-like
CsaV3_3G000630	protein MID1-COMPLEMENTING ACTIVITY 1
CsaV3_1G014170	Late embryogenesis abundant protein
CsaV3_1G012290	Phosphoglycerate mutase, putative
CsaV3_3G020240	Homeobox Hox-B3-like protein
CsaV3_5G031900	IAA-amino acid hydrolase ILR1, putative
CsaV3_6G021830	Ethylene-responsive transcription factor rap2-7
CsaV3_3G009420	Hexosyltransferase
CsaV3_2G027890	Calcium-dependent protein kinase
CsaV3_1G011320	Kinesin-like protein
CsaV3_5G008270	Ribulose bisphosphate carboxylase/oxygenase activase
CsaV3_1G043650	3-hydroxyisobutyryl-CoA hydrolase-like protein 1, mitochondrial
CsaV3_5G023940	condensin complex subunit 3
CsaV3_5G033890	Cytochrome b561
CsaV3_6G047970	Unknown protein
CsaV3_6G052520	fatty acid hydroxylase 2
CsaV3_3G031680	Dihydroorotate dehydrogenase, putative
CsaV3_4G035750	protein IQ-DOMAIN 1
CsaV3_2G007390	MYB transcription factor
CsaV3_6G028390	malate dehydrogenase
CsaV3_6G049080	Senescence regulator
CsaV3_5G037200	Gdsl esterase/lipase
CsaV3_6G013800	Chlorophyll a-b binding protein, chloroplastic
CsaV3_5G017160	Receptor-like kinase
CsaV3_2G025300	Ankyrin repeat-containing protein
CsaV3_5G002910	Heavy metal ATPase 5A
CsaV3_4G034380	Remorin
CsaV3_2G009650	Ubiquitin carboxyl-terminal hydrolase
CsaV3_5G026790	protein WVD2-like 7 isoform X1
CsaV3_3G009740	Receptor-like kinase
CsaV3_5G020280	CoA ligase
CsaV3_1G038900	Pentatricopeptide repeat
CsaV3_4G000140	Cyclin d protein
CsaV3_1G008330	RING-H2 finger protein ATL46-like
CsaV3_5G005410	Ribonuclease H-like domain containing protein
CsaV3_5G037980	protease Do-like 8, chloroplastic
CsaV3_4G009860	Protein GLUTAMINE DUMPER
CsaV3_6G007720	Glycosyl transferase
CsaV3_5G020440	NAC domain-containing protein 45
CsaV3_1G006400	protein MIZU-KUSSEI 1-like
CsaV3_1G000080	magnesium-protoporphyrin IX methyltransferase
CsaV3_6G002310	Sorghum bicolor protein targeted either to mitochondria or chloroplast proteins T50848
CsaV3_1G029490	RING-H2 finger protein ATL13
CsaV3_3G015530	DNA binding protein
CsaV3_6G044070	Condensin-2 complex subunit g2
CsaV3_5G033060	protein argonaute 7
CsaV3_7G022070	Unknown protein
CsaV3_6G002860	GPCR kinase
CsaV3_2G007130	protein EFR3 homolog B-like
CsaV3_2G024470	Phospholipase D
CsaV3_3G037790	aspartic proteinase nepenthesin-2
CsaV3_6G051020	Transcription factor bHLH35-like protein
CsaV3_3G016280	Protein EXORDIUM-like
CsaV3_7G030930	cation/H(+) antiporter 28
CsaV3_6G037790	Tyrosine-protein phosphatase
CsaV3_5G004470	DUF1639 family protein
CsaV3_1G013320	protein NUCLEAR FUSION DEFECTIVE 4-like
CsaV3_6G042240	protein SLOW GREEN 1, chloroplastic-like
CsaV3_5G004040	Oxysterol-binding protein
CsaV3_1G029210	DNA-directed RNA polymerase subunit beta
CsaV3_2G017240	Molybdenum cofactor sulfurase
CsaV3_2G031200	chaperone protein dnaJ-related
CsaV3_5G025950	protein IQ-DOMAIN 1-like
CsaV3_6G007480	Embryo sac development arrest 6 protein
CsaV3_2G010270	Transmembrane protein
CsaV3_6G014860	Protein kinase like protein
CsaV3_3G020110	Glyceraldehyde-3-phosphate dehydrogenase
CsaV3_7G027160	Lipoxygenase
CsaV3_7G031370	protein trichome birefringence-like 14
CsaV3_5G030390	Receptor protein kinase-like protein
CsaV3_7G032580	Dna replication complex gins protein psf1
CsaV3_7G003440	cellulose synthase-like protein B4
CsaV3_2G010090	Photosystem I reaction center subunit IV
CsaV3_4G033940	lysine histidine transporter-like 8
CsaV3_6G043430	Receptor protein kinase, putative
CsaV3_4G005770	Glucose-6-phosphate 1-epimerase
CsaV3_6G007960	Pollen Ole e 1 allergen/extensin
CsaV3_1G037420	50S ribosomal protein L33-like
CsaV3_1G029750	Receptor protein kinase
CsaV3_5G000310	Impaired sucrose induction protein, putative
CsaV3_7G033230	G-type lectin s-receptor-like serine/threonine-protein kinase
CsaV3_1G031810	Core-2/I-branching beta-1,6-N-acetylglucosaminyltransferase family protein
CsaV3_2G035010	Glutamate receptor
CsaV3_4G028930	pentatricopeptide repeat-containing protein At3g14730-like
CsaV3_1G011450	Pro-resilin
CsaV3_6G005760	dTDP-4-dehydrorhamnose reductase
CsaV3_1G003230	pentatricopeptide repeat-containing protein At1g18485
CsaV3_7G035360	Avr9/Cf-9 rapidly elicited protein
CsaV3_3G037580	lysosomal Pro-X carboxypeptidase-like
CsaV3_1G040360	Cytoplasmic FMR1-interacting
CsaV3_3G013460	Sugar transporter, putative
CsaV3_4G032100	Aldo/keto reductase family protein
CsaV3_3G032350	C2 domain, Phosphoribosyltransferase
CsaV3_6G004940	Leucine-rich receptor-like protein kinase family protein
CsaV3_1G036610	Cinnamoyl-CoA reductase, putative
CsaV3_4G033780	choline transporter-like protein 2
CsaV3_2G015950	Peptidyl-prolyl cis-trans isomerase
CsaV3_4G033100	Polynucleotide kinase 3 phosphatase
CsaV3_1G041980	F-box/kelch-repeat protein
CsaV3_2G026030	glutamic acid-rich protein
CsaV3_3G038530	Transient receptor potential cation channel subfamily M member like
CsaV3_1G008460	DUF1645 family protein
CsaV3_5G029060	GEM-like protein 4
CsaV3_5G029520	Type I inositol polyphosphate 5-phosphatase
CsaV3_6G053140	RING/U-box superfamily protein
CsaV3_3G009900	Upstream activation factor subunit spp27 like
CsaV3_7G023270	Desi-like protein
CsaV3_5G039010	Unknown protein
CsaV3_2G001190	Mediator of RNA polymerase II transcription subunit 20
CsaV3_1G044150	AT1G65230-like protein
CsaV3_1G007980	Plasma membrane ATPase
CsaV3_3G033230	G-type lectin S-receptor-like serine/threonine-protein kinase
CsaV3_6G002810	Farnesyl pyrophosphate synthase
CsaV3_3G006410	Multidrug resistance 3
CsaV3_2G004990	Aminotransferase
CsaV3_2G018190	Pectinesterase
CsaV3_1G040290	Unknown protein
CsaV3_1G011000	CRIB domain-containing protein RIC10-like
CsaV3_2G002530	Protein kinase
CsaV3_3G037420	Kinesin-like protein
CsaV3_1G003410	COBRA-like protein
CsaV3_5G002190	Cysteine alpha-hairpin motif superfamily
CsaV3_1G032090	Homeobox-leucine zipper protein family
CsaV3_5G029560	65-kDa microtubule-associated protein 5
CsaV3_5G001940	DUF2439 family protein
CsaV3_4G003440	Kinase family protein
CsaV3_3G005990	Monodehydroascorbate reductase
CsaV3_3G003390	Sugar phosphate transporter domain containing protein
CsaV3_6G042130	3-dehydroquinate dehydratase/shikimate dehydrogenase 3
CsaV3_1G032410	Glucan endo-1,3-beta-glucosidase, putative
CsaV3_1G036240	transcriptional regulator ATRX homolog isoform X1
CsaV3_1G046210	Zinc-binding protein
CsaV3_5G004710	Sn1-specific diacylglycerol lipase alpha
CsaV3_6G009340	PTB domain engulfment adapter
CsaV3_5G006580	Unknown protein
CsaV3_7G008350	Leucine-rich repeat (LRR) family protein
CsaV3_4G003430	Chromatin structure-remodeling complex subunit like
CsaV3_6G046280	GATA transcription factor 18
CsaV3_4G005500	GTPase Era
CsaV3_6G032170	separase isoform X1
CsaV3_2G010460	Beta-glucosidase
CsaV3_6G014750	Unknown protein
CsaV3_5G011170	Unknown protein
CsaV3_UNG208910	Unknown protein
CsaV3_5G026860	zinc finger protein CONSTANS-LIKE 6
CsaV3_5G002990	Myosin heavy chain-related protein, putative
CsaV3_2G016040	LOW QUALITY PROTEIN: synaptotagmin-1-like
CsaV3_6G013300	ABC transporter ATP-binding protein
CsaV3_4G037750	Proton pump-interactor 1
CsaV3_6G034230	E3 ubiquitin ligase BIG BROTHER-related-like
CsaV3_4G006320	DUF1191 domain-containing protein
CsaV3_4G025800	Sugar phosphate transporter domain containing protein
CsaV3_1G030470	Exostosin family protein
CsaV3_1G003380	squamosa promoter-binding-like protein 6
CsaV3_1G031020	Pentatricopeptide repeat-containing protein
CsaV3_3G014740	Malectin/receptor protein kinase family protein, putative
CsaV3_6G047980	Histidine phosphatase
CsaV3_7G003010	Unknown protein
CsaV3_1G003240	tRNA(Ile2) 2-agmatinylcytidine synthetase TiaS (tRNA(Ile2)-agm2C synthetase) like
CsaV3_4G030560	Phloem lectin
CsaV3_1G041160	DUF1677 family protein
CsaV3_2G032250	Flotillin-like protein
CsaV3_2G031730	Pleiotropic drug resistance ABC transporter
CsaV3_5G005350	Serine/threonine-protein kinase
CsaV3_3G020330	LuxR family transcriptional regulator, putative
CsaV3_2G027790	Chlorophyll a-b binding protein, chloroplastic
CsaV3_2G012410	Calcium-dependent lipid-binding domain-containing protein
CsaV3_5G015150	Receptor-kinase, putative
CsaV3_6G014350	RING finger and CHY zinc finger protein
CsaV3_1G032810	Unknown protein
CsaV3_1G009250	Gdsl esterase/lipase
CsaV3_7G004220	BEST plant protein match is: (TAIR:plant.1) protein, putative
CsaV3_1G012190	allantoinase
CsaV3_2G006990	calreticulin
CsaV3_3G013410	Polyamine aminopropyltransferase
CsaV3_5G039460	RING-H2 finger protein ATL7
CsaV3_3G023720	GATA transcription factor
CsaV3_3G049140	ADP-ribosylation factor GTPase-activating protein
CsaV3_3G038540	histone-lysine N-methyltransferase ATXR4 isoform X1
CsaV3_3G015300	Galactokinase
CsaV3_2G008690	Subtilisin-like protease
CsaV3_6G022580	GATA transcription factor
CsaV3_1G017330	Unknown protein
CsaV3_3G038800	Actin
CsaV3_3G013910	Peptide methionine sulfoxide reductase
CsaV3_3G026480	acyltransferase-like protein At3g26840, chloroplastic
CsaV3_3G017000	Methyl-CpG-binding domain-containing 13-like protein
CsaV3_3G034930	Peptide transporter family protein
CsaV3_3G014090	vesicle-associated protein 1-2-like
CsaV3_1G044620	proteinaceous RNase P 1, chloroplastic/mitochondrial-like
CsaV3_2G029610	thaumatin-like protein
CsaV3_5G033870	piriformospora indica-insensitive protein 2
CsaV3_2G034230	Tyrosine-protein kinase
CsaV3_2G008770	transcription factor bHLH35-like
CsaV3_6G013020	expansin-B3
CsaV3_5G011180	serine/arginine repetitive matrix protein 2-like isoform X1
CsaV3_5G038040	ATP-dependent zinc metalloprotease FTSH protein
CsaV3_3G045040	protein LIKE COV 1-like
CsaV3_1G005320	HVA22-like protein
CsaV3_3G033220	WEB family protein At2g38370
CsaV3_1G003220	signal peptide peptidase
CsaV3_5G005010	origin recognition complex subunit 3
CsaV3_5G029680	S-acyltransferase
CsaV3_3G040460	S-adenosyl-L-methionine-dependent methyltransferases superfamily protein
CsaV3_3G013010	protein tesmin/TSO1-like CXC 2
CsaV3_3G036600	wall-associated receptor kinase-like 20
CsaV3_6G042420	Shikimate kinase
CsaV3_3G000830	Endoglucanase
CsaV3_6G033650	PLASMODESMATA CALLOSE-BINDING PROTEIN 3-like
CsaV3_1G013510	ARM repeat superfamily protein
CsaV3_4G037610	Phosphate transporter
CsaV3_1G029460	Transcription factor like
CsaV3_4G008750	Biotin carboxyl carrier protein of acetyl-CoA carboxylase
CsaV3_5G001510	Hexosyltransferase
CsaV3_1G013090	interactor of constitutive active ROPs 3-like
CsaV3_3G011720	Cysteine-rich repeat secretory protein like
CsaV3_UNG075590	condensin-2 complex subunit D3
CsaV3_3G019950	Zinc finger protein CONSTANS-LIKE 5
CsaV3_3G042040	Peroxidase
CsaV3_6G035680	pentatricopeptide repeat-containing protein At1g19720-like
CsaV3_4G037070	L-ascorbate oxidase homolog
CsaV3_1G001290	kinetochore protein spc25
CsaV3_5G026630	Transmembrane protein, putative
CsaV3_7G031580	Protein of Unknown Function (DUF239)
CsaV3_6G039530	Aquaporin
CsaV3_3G031580	Chlorophyll a-b binding protein, chloroplastic
CsaV3_4G034020	CST complex subunit CTC1
CsaV3_7G006490	copper-transporting ATPase PAA1, chloroplastic-like
CsaV3_3G043770	Glyoxylate/succinic semialdehyde reductase
CsaV3_3G007820	WW domain-binding protein 11-like
CsaV3_3G012670	alpha-1,2-Mannosidase
CsaV3_5G003710	deoxyribodipyrimidine photo-lyase
CsaV3_2G031270	Ribonuclease h2 subunit b
CsaV3_4G024810	SANT associated
CsaV3_3G034970	beta-glucuronosyltransferase GlcAT14C
CsaV3_3G017370	neuron navigator 1-like
CsaV3_4G005270	Leucine-rich repeat receptor-like protein kinase
CsaV3_1G032850	exonuclease 1
CsaV3_5G003820	Cytochrome P450, putative
CsaV3_6G038430	F-box family protein, putative
CsaV3_6G015920	Glucan endo-1,3-beta-glucosidase
CsaV3_4G008880	Adenine deaminase
CsaV3_3G010380	Glutamyl-tRNA(Gln) amidotransferase subunit B like
CsaV3_1G034490	Isoprenylcysteine carboxyl methyltransferase
CsaV3_6G043540	Microtubule-associated protein RP/EB
CsaV3_3G005730	polyol transporter 5-like
CsaV3_6G031370	monosaccharide-sensing protein 2-like
CsaV3_5G013190	Dna repair protein xrcc2 like
CsaV3_6G048690	Serine/arginine repetitive matrix protein 2, putative
CsaV3_5G004140	14 kDa proline-rich protein DC2.15-like
CsaV3_5G013270	Sulfate transporter
CsaV3_3G050020	Ubiquitin ligase protein cop1
CsaV3_5G002730	UDP-N-acetylmuramoyl-L-alanyl-D-glutamate--2, 6-diaminopimelate ligase
CsaV3_3G028700	Pectate lyase
CsaV3_6G039140	Phosphotransferase
CsaV3_5G033200	SNAP25 homologous protein SNAP33
CsaV3_2G025880	Xyloglucan glycosyltransferase
CsaV3_1G012000	Polyphenol oxidase
CsaV3_6G003980	Cmp-sialic acid transporter, putative
CsaV3_7G027320	Pollen Ole e I family allergen protein
CsaV3_3G009790	Transketolase
CsaV3_7G030740	50S ribosomal protein L1
CsaV3_5G023750	aspartic proteinase-like protein 1
CsaV3_1G011020	Xyloglucan endotransglucosylase/hydrolase
CsaV3_7G006590	Glycosyltransferase
CsaV3_5G034210	Dihydrolipoamide acetyltransferase component of pyruvate dehydrogenase complex
CsaV3_6G015010	ABSCISIC ACID-INSENSITIVE 5-like protein 1
CsaV3_4G028050	replication factor C subunit 4
CsaV3_3G045800	C2H2-like zinc finger protein
CsaV3_2G017290	Rapid ALkalinization Factor
CsaV3_2G007270	Gdsl esterase/lipase
CsaV3_7G004140	external alternative NAD(P)H-ubiquinone oxidoreductase B1, mitochondrial
CsaV3_4G029360	stomatal closure-related actin-binding protein 1-like
CsaV3_7G015100	Unknown protein
CsaV3_3G002130	Poly(U)-specific endoribonuclease
CsaV3_2G029290	protein ACCUMULATION AND REPLICATION OF CHLOROPLASTS 6, chloroplastic
CsaV3_4G006030	Myosin heavy chain-related protein, putative
CsaV3_7G007460	transcription factor bHLH18-like isoform X2
CsaV3_2G019570	NAD-dependent protein deacylase
CsaV3_3G004000	caffeic acid 3-O-methyltransferase-like
CsaV3_7G034480	nodulation-signaling pathway 1 protein
CsaV3_3G042410	Calcium homeostasis regulator CHoR1, putative
CsaV3_4G024590	Ankyrin repeat family protein
CsaV3_7G006040	Dynamin-like protein
CsaV3_7G004290	Protein phosphatase 2C family protein
CsaV3_1G011180	cysteine-rich receptor-like protein kinase 25
CsaV3_7G033440	Protein NRT1/ PTR FAMILY 1.2
CsaV3_2G013340	Protein RNA-directed DNA methylation like
CsaV3_6G042080	Ribonucleoside-diphosphate reductase
CsaV3_1G008240	RING-type E3 ubiquitin transferase
CsaV3_2G007840	Tetraspanin
CsaV3_4G008310	Serine/threonine-protein phosphatase 4 regulatory subunit 2-A, putative
CsaV3_3G044900	DNA-3-methyladenine glycosylase, putative
CsaV3_3G039120	Chaperone protein dnaJ, putative
CsaV3_6G001530	UDP-glycosyltransferase 76F1-like
CsaV3_1G030840	Iron-sulfur cluster carrier protein
CsaV3_3G014930	chaperone protein DnaJ
CsaV3_6G046400	Replication factor C subunit 3
CsaV3_6G034310	Ascorbate peroxidase
CsaV3_1G031950	protein SMAX1-LIKE 4-like
CsaV3_1G009700	Molybdenum cofactor sulfurase
CsaV3_1G014520	Nucleobase-ascorbate transporter
CsaV3_2G029630	Chaperone protein htpG family protein
CsaV3_2G034220	EF-hand domain pair
CsaV3_5G026960	Plexin-D1 like
CsaV3_3G008320	Phosphatidylinositol-4-phosphate 5-kinase
CsaV3_3G010430	protein TRIGALACTOSYLDIACYLGLYCEROL 4, chloroplastic
CsaV3_7G031420	Bromodomain-containing protein
CsaV3_3G011480	coenzyme F420 hydrogenase family / dehydrogenase, beta subunit family
CsaV3_7G002460	Acetyl-CoA acetyltransferase
CsaV3_4G008190	NAD kinase
CsaV3_3G030180	Glucan endo-1,3-beta-glucosidase-like protein
CsaV3_3G033400	Development/cell death domain containing protein
CsaV3_2G016610	Aspartic proteinase-like protein 2
CsaV3_6G009070	cell number regulator 6
CsaV3_1G043860	RING-type E3 ubiquitin transferase
CsaV3_5G025200	Ankyrin repeat-containing protein
CsaV3_7G002320	Subtilisin-like protease
CsaV3_6G022540	MYB-related transcription factor
CsaV3_2G006820	Topless-related protein
CsaV3_7G023770	50S ribosomal protein L21
CsaV3_1G000140	Electron transporter
CsaV3_4G030550	Phloem lectin
CsaV3_3G041440	L10-interacting MYB domain-containing protein-like isoform X2
CsaV3_2G001770	DUF1005 family protein (DUF1005)
CsaV3_6G049030	Hexosyltransferase
CsaV3_1G014530	DUF868 family protein
CsaV3_3G006860	Very-long-chain (3R)-3-hydroxyacyl-CoA dehydratase
CsaV3_3G037470	Ribosomal protein
CsaV3_3G041710	Auxin efflux carrier component
CsaV3_1G002410	Chlorophyll a-b binding protein, chloroplastic
CsaV3_3G042800	F-box/LRR-repeat protein 4
CsaV3_3G001680	ubiquitin carboxyl-terminal hydrolase 20-like
CsaV3_1G031700	Protein kinase family protein
CsaV3_4G032550	36.4 kDa proline-rich protein
CsaV3_4G037280	Niemann-pick c1 protein
CsaV3_4G037580	NAC domain containing protein
CsaV3_3G032600	Beta-hexosaminidase
CsaV3_3G040490	Unknown protein
CsaV3_1G038620	Pectinesterase
CsaV3_5G028520	pentatricopeptide repeat-containing protein At1g71060, mitochondrial
CsaV3_5G003450	Nudix hydrolase
CsaV3_4G001020	kinesin-4
CsaV3_1G009090	Cytochrome P450
CsaV3_6G045340	Haloacid dehalogenase-like hydrolase domain-containing protein
CsaV3_1G010260	Ankyrin repeat-containing protein
CsaV3_4G031220	Pentatricopeptide repeat-containing protein family
CsaV3_UNG097730	protein disulfide-isomerase 5-4-like
CsaV3_7G027790	Homocysteine S-methyltransferase
CsaV3_6G035670	Unknown protein
CsaV3_2G029450	transcription factor E2FC isoform X3
CsaV3_3G004140	Oligopeptide transporter
CsaV3_2G008220	zinc finger protein CONSTANS-LIKE 5-like
CsaV3_4G005280	GATA transcription factor
CsaV3_5G008530	Cucumisin
CsaV3_3G028550	receptor-like serine/threonine-protein kinase ALE2
CsaV3_3G007050	Cytochrome P450, putative
CsaV3_3G001190	calcium permeable stress-gated cation channel 1-like
CsaV3_3G016110	Unknown protein
CsaV3_2G006510	UDP-N-acetylmuramoylalanine--D-glutamate ligase
CsaV3_5G024560	myosin heavy chain kinase B
CsaV3_7G005570	Protein of unknown function (DUF620)
CsaV3_6G048820	Wall-associated receptor kinase-like
CsaV3_7G008870	Unknown protein
CsaV3_1G009570	cycloeucalenol cycloisomerase
CsaV3_1G040610	DUF3511 domain protein
CsaV3_6G015230	transcription factor TCP4-like
CsaV3_1G039900	programmed cell death protein 4-like
CsaV3_3G041910	Cyclic nucleotide-gated ion channel, putative
CsaV3_5G032510	Homeobox-leucine zipper protein like
CsaV3_3G022780	Unknown protein
CsaV3_5G037650	ABC transporter B family protein
CsaV3_2G012510	FK506-binding nuclear-like protein
CsaV3_4G005070	GRAS transcription factor
CsaV3_2G032100	Receptor protein kinase
CsaV3_2G031640	cyclin-A2-2-like isoform X1
CsaV3_2G009710	cleavage and polyadenylation specificity factor subunit 1-like
CsaV3_3G013850	AWPM-19-like family protein
CsaV3_6G001080	Protoporphyrinogen oxidase
CsaV3_2G016510	BTB/POZ domain-containing protein
CsaV3_1G003970	Core-2/I-branching beta-1,6-N-acetylglucosaminyltransferase family protein
CsaV3_3G031650	Boron transporter like
CsaV3_1G005720	Protein kinase superfamily protein
CsaV3_6G032190	separase isoform X2
CsaV3_7G003000	transcription initiation factor TFIID subunit 6-like
CsaV3_4G037630	short-chain dehydrogenase/reductase family 42E member 1
CsaV3_3G003250	methylsterol monooxygenase 1-1-like
CsaV3_6G015960	Protein kinase, putative
CsaV3_4G005820	Kinesin-like protein
CsaV3_7G021060	Unknown protein
CsaV3_7G028580	isoamylase 2, chloroplastic
CsaV3_4G033130	peptide-N4-(N-acetyl-beta- glucosaminyl)asparagine amidase A
CsaV3_1G041430	DNA repair protein RAD51 homolog
CsaV3_5G001340	S-adenosyl-L-methionine-dependent methyltransferases superfamily protein
CsaV3_6G037390	elongation of fatty acids protein 3-like
CsaV3_5G027060	RNA-binding, CRM domain containing protein
CsaV3_5G024510	Phosphatidylinositol 4-phosphate 5-kinase
CsaV3_1G006380	Phospholipid-transporting ATPase
CsaV3_2G010180	Pathogenic type III effector avirulence factor Avr cleavage site
CsaV3_1G002370	Geranylgeranyl reductase
CsaV3_4G027020	Unknown protein
CsaV3_3G033890	Alpha-amylase
CsaV3_1G013140	50S ribosomal protein L9
CsaV3_7G031990	Kinase family protein
CsaV3_1G042130	LOW QUALITY PROTEIN: probable inactive receptor kinase At5g10020
CsaV3_3G020410	MYB-related transcription factor
CsaV3_7G028080	fatty-acid-binding protein 1
CsaV3_7G022950	Transglycosylase SLT domain
CsaV3_6G012530	Glutamate formimidoyltransferase
CsaV3_1G003120	plant cysteine oxidase 3 isoform X2
CsaV3_1G024400	Dynein light chain
CsaV3_3G008350	protein CURVATURE THYLAKOID 1A, chloroplastic
CsaV3_5G008670	Glycosyltransferase
CsaV3_5G013850	Carboxypeptidase
CsaV3_7G002620	Chlorophyll a-b binding protein, chloroplastic
CsaV3_3G048590	VAN3-binding protein-like isoform X1
CsaV3_6G051880	Unknown protein
CsaV3_1G025460	Late embryogenesis abundant protein
CsaV3_7G004490	Lectin receptor kinase
CsaV3_1G001440	WD repeat-containing protein
CsaV3_1G006080	protein LONGIFOLIA 1-like
CsaV3_1G000880	alpha/beta hydrolase domain-containing protein 17B-like
CsaV3_3G044570	Molybdenum cofactor sulfurase
CsaV3_3G039100	transcription factor bHLH48
CsaV3_6G051760	Glucan endo-1,3-beta-glucosidase, putative
CsaV3_3G005790	Receptor-like protein kinase
CsaV3_5G004800	protein NRT1/ PTR FAMILY 5.10-like
CsaV3_3G040160	sigma factor binding protein 2, chloroplastic
CsaV3_6G016580	Unknown protein
CsaV3_4G001400	Zinc finger (Ran-binding) family protein
CsaV3_2G024330	transcription termination factor MTERF8, chloroplastic-like
CsaV3_1G032580	3-oxoacyl-[acyl-carrier-protein] synthase
CsaV3_3G022220	rho-N domain-containing protein 1, chloroplastic
CsaV3_5G033290	Ureide permease
CsaV3_5G030620	RING finger protein
CsaV3_5G001930	30S ribosomal protein S6 alpha, chloroplastic
CsaV3_3G010060	Pentatricopeptide repeat-containing protein, putative
CsaV3_7G032330	post-illumination chlorophyll fluorescence increase
CsaV3_1G038210	Pectin acetylesterase
CsaV3_3G037000	Drug resistance transporter-like ABC domain protein
CsaV3_6G004090	Cytochrome P450
CsaV3_2G033270	Dynamin homolog
CsaV3_7G008540	thioredoxin M3, chloroplastic
CsaV3_5G013400	protein WVD2-like 7 isoform X2
CsaV3_3G006650	Protein NRT1/ PTR FAMILY 4.4 like
CsaV3_1G032560	tobamovirus multiplication protein 1-like isoform X1
CsaV3_1G006800	LEAF RUST 10 DISEASE-RESISTANCE LOCUS RECEPTOR-LIKE PROTEIN KINASE-like 1.2
CsaV3_1G008490	Dof zinc finger protein like
CsaV3_1G008200	E2F transcription factor-like
CsaV3_2G035370	Unknown protein
CsaV3_3G031800	Porphobilinogen deaminase
CsaV3_2G016450	PI-PLC X domain-containing protein
CsaV3_6G013260	Ycf54 domain-containing protein
CsaV3_3G028070	cyclic nucleotide-gated ion channel 1-like
CsaV3_6G038930	Peptidyl-prolyl cis-trans isomerase
CsaV3_3G042970	Transcription factor
CsaV3_3G049020	Unknown protein
CsaV3_7G003950	S-adenosyl-L-methionine-dependent methyltransferase-like protein
CsaV3_3G041980	mitogen-activated protein kinase kinase kinase YODA-like
CsaV3_3G045710	Auxin-responsive protein
CsaV3_5G036170	N-acetyltransferase
CsaV3_6G014400	Superoxide dismutase [Cu-Zn]
CsaV3_4G027010	Aspartate aminotransferase
CsaV3_6G036080	Transcription factor
CsaV3_3G003230	IRK-interacting protein-like
CsaV3_3G042540	ADP-ribosylation factor
CsaV3_4G012090	ATP-dependent DNA helicase
CsaV3_5G025110	Mitotic checkpoint protein bub3
CsaV3_3G008210	Unknown protein
CsaV3_4G036200	protein ROOT PRIMORDIUM DEFECTIVE 1
CsaV3_3G008690	50S ribosomal protein L5, putative
CsaV3_UNG053450	NADH-ubiquinone oxidoreductase subunit
CsaV3_2G025180	protein WVD2-like 7
CsaV3_2G035400	arginine decarboxylase-like
CsaV3_5G004500	Unknown protein
CsaV3_4G031770	triosephosphate isomerase
CsaV3_3G030860	Peroxisomal (S)-2-hydroxy-acid oxidase
CsaV3_3G014130	Divinyl chlorophyllide a 8-vinyl-reductase, chloroplastic
CsaV3_5G003020	30S ribosomal protein S1
CsaV3_7G000450	NADP-dependent sorbitol-6-phosphate dehydrogenase
CsaV3_6G040630	Purple acid phosphatase
CsaV3_3G041210	TIR-NBS-LRR disease resistance protein
CsaV3_4G025630	Glutathione S-transferase
CsaV3_2G006740	F-actin-capping protein subunit alpha
CsaV3_1G040300	K(+) efflux antiporter
CsaV3_4G026380	Proliferation-associated 2G4-like protein
CsaV3_7G002340	Histidine--tRNA ligase
CsaV3_7G000280	kinesin-related protein 11
CsaV3_2G009680	Photosystem I reaction center subunit XI
CsaV3_6G001900	transcription factor bHLH51
CsaV3_3G005680	exosome complex exonuclease RRP44
CsaV3_3G030410	4-coumarate-CoA ligase
CsaV3_4G002710	Elongation factor
CsaV3_2G002210	DUF4378 domain-containing protein
CsaV3_3G004580	Cell division protein FtsZ
CsaV3_3G043460	sugar transport protein 13-like
CsaV3_5G038580	Unknown protein
CsaV3_1G011950	caffeoylshikimate esterase
CsaV3_3G019800	Ribonuclease P protein subunit P38-related isoform 1
CsaV3_3G004110	fasciclin-like arabinogalactan protein 1
CsaV3_1G010960	Beta-glucosidase
CsaV3_3G018410	Unknown protein
CsaV3_6G037230	Copalyl diphosphate synthase
CsaV3_6G031360	Unknown protein
CsaV3_1G044490	Basic leucine zipper/W2 domain protein
CsaV3_1G001870	Enhanced disease susceptibility 1 protein
CsaV3_5G019990	carbon catabolite repressor protein 4 homolog 4
CsaV3_1G031190	small nuclear ribonucleoprotein E-like
CsaV3_6G050830	50S ribosomal protein L34, chloroplastic
CsaV3_1G041760	inactive protein RESTRICTED TEV MOVEMENT 2-like
CsaV3_3G031970	RNA polymerase sigma factor
CsaV3_5G028280	21 kDa protein
CsaV3_5G003720	IRK-interacting protein
CsaV3_6G038260	Membrane-associated kinase regulator-like protein, putative
CsaV3_6G039400	DNA-binding protein S1FA
CsaV3_2G018160	Histone-lysine N-methyltransferase ATXR6
CsaV3_1G004280	ras-related protein RABA6a-like
CsaV3_3G020160	Root UVB sensitive family
CsaV3_5G038590	Unknown protein
CsaV3_7G034320	Inter-alpha-trypsin inhibitor heavy chain, putative
CsaV3_4G023990	S-receptor-like serine/threonine-protein kinase
CsaV3_3G042530	ADP-ribosylation factor
CsaV3_2G010590	Peptidyl-prolyl cis-trans isomerase
CsaV3_5G001110	Unknown protein
CsaV3_2G008500	Homogentisate phytyltransferase
CsaV3_5G031500	1,4-Dihydroxy-2-naphthoyl-CoA synthase
CsaV3_1G014110	Histone H2B
CsaV3_7G031720	aspartyl protease family protein At5g10770
CsaV3_7G003680	Hexokinase-1 protein
CsaV3_6G014670	histone deacetylase HDT1-like
CsaV3_6G001130	sister chromatid cohesion 1 protein 2 isoform X1
CsaV3_4G003470	Receptor protein kinase
CsaV3_6G006270	Transketolase
CsaV3_1G031900	macrophage migration inhibitory factor homolog
CsaV3_4G030400	Kinase family protein
CsaV3_6G015760	HVA22-like protein
CsaV3_3G006360	Bile acid sodium symporter/ transporter
CsaV3_5G037950	Transcription factor
CsaV3_5G011200	RNA-dependent RNA polymerase
CsaV3_3G026540	Insulin-induced protein family
CsaV3_1G015490	Pentatricopeptide repeat-containing protein
CsaV3_3G039020	Unknown protein
CsaV3_UNG207810	DNA-directed RNA polymerase subunit beta''
CsaV3_6G044510	Tubulin alpha chain
CsaV3_3G040830	Serine/threonine-protein like
CsaV3_5G006570	Membrane-associated kinase regulator 4
CsaV3_6G050640	Mg-protoporphyrin IX chelatase
CsaV3_4G009200	Alpha/beta hydrolase, putative
CsaV3_6G038460	NAC domain-containing protein 40
CsaV3_3G025000	photosystem I reaction center subunit VI, chloroplastic
CsaV3_3G000740	thaumatin-like protein 1
CsaV3_5G039020	Receptor-like kinase
CsaV3_1G036660	Methyltransferase-related protein
CsaV3_3G007720	rho GTPase-activating protein 5
CsaV3_1G032130	Ring finger protein, putative
CsaV3_2G035860	maltose excess protein 1, chloroplastic-like
CsaV3_3G047390	pentatricopeptide repeat-containing protein At3g09060-like
CsaV3_7G026880	Lipid-transfer protein
CsaV3_6G005510	S-adenosylmethionine decarboxylase proenzyme
CsaV3_2G013610	protein NETWORKED 1D-like
CsaV3_6G015190	Tyrosine aminotransferase
CsaV3_3G006740	2-C-methyl-D-erythritol 4-phosphate cytidylyltransferase
CsaV3_6G036180	Mitochondrial outer membrane protein porin
CsaV3_5G027980	B3 domain-containing protein
CsaV3_3G033600	Glutaredoxin
CsaV3_4G026470	plectin-like
CsaV3_6G042440	Transmembrane protein
CsaV3_2G013240	acylamino-acid-releasing enzyme
CsaV3_6G015540	Protein disulfide isomerase-like
CsaV3_3G032880	DNA helicase
CsaV3_2G028020	Origin recognition complex, subunit 2
CsaV3_6G041940	Transmembrane protein
CsaV3_2G016390	AP2-like ethylene-responsive transcription factor TOE3 isoform X1
CsaV3_3G023810	DNA-directed RNA polymerase subunit beta
CsaV3_7G034390	Lipoxygenase
CsaV3_3G035270	Unknown protein
CsaV3_3G010300	protein ECERIFERUM 1-like
CsaV3_4G033510	Ribosomal protein l11 methyltransferase
CsaV3_6G037700	Unknown protein
CsaV3_3G008420	arabinogalactan peptide 20-like
CsaV3_1G014820	Ribosomal protein
CsaV3_3G043400	HNH endonuclease
CsaV3_1G029230	heptahelical transmembrane protein 2
CsaV3_4G001110	neuronal acetylcholine receptor subunit alpha-2-like
CsaV3_6G000170	Pentatricopeptide repeat-containing, chloroplastic-like protein
CsaV3_3G044890	Histone deacetylase complex subunit SAP30
CsaV3_6G038120	Plant basic secretory protein (BSP) family protein
CsaV3_6G017200	40S ribosomal protein S21
CsaV3_1G003690	carbon catabolite repressor protein 4 homolog 3 isoform X1
CsaV3_7G003430	Cell differentiation, Rcd1-like protein
CsaV3_2G011040	Complex 1 LYR protein
CsaV3_3G015370	Stress responsive A/B barrel domain protein
CsaV3_3G034160	Phosphate transporter
CsaV3_2G031090	DNA polymerase theta
CsaV3_5G002670	Disease resistance protein (TIR-NBS class)
CsaV3_3G016210	21 kDa protein-like
CsaV3_7G002310	Glucose-1-phosphate adenylyltransferase
CsaV3_5G023910	Tetratricopeptide repeat-like superfamily protein
CsaV3_7G033660	Ribosomal protein L34Ae
CsaV3_1G024140	ABIL1-like protein
CsaV3_3G019580	glutamic acid-rich protein isoform X1
CsaV3_2G015270	Endoglucanase
CsaV3_1G014700	THO complex subunit 2
CsaV3_6G003620	nodulation-signaling pathway 2 protein
CsaV3_6G045820	Translation initiation factor
CsaV3_5G023550	Myotubularin-like protein
CsaV3_2G013180	protein SIEVE ELEMENT OCCLUSION B-like
CsaV3_5G010540	Trichome birefringence-like protein
CsaV3_3G038430	S-adenosyl-L-methionine-dependent methyltransferase superfamily protein
CsaV3_5G003830	Cytochrome P450 family protein
CsaV3_7G007390	Glutamyl-tRNA(Gln) amidotransferase subunit A, putative
CsaV3_4G036560	DNA-directed RNA polymerase subunit beta
CsaV3_5G008700	Class I heat shock protein
CsaV3_3G034690	Lectin receptor kinase
CsaV3_7G031870	Receptor-like protein kinase
CsaV3_4G023320	Acetyl-coenzyme A synthetase
CsaV3_5G010840	Potassium transporter
CsaV3_4G010260	Methyl esterase
CsaV3_2G030150	Crt
CsaV3_2G033990	Actin-related protein
CsaV3_2G015170	Kinesin-like protein
CsaV3_5G039440	Unknown protein
CsaV3_3G006380	Receptor-like protein kinase
CsaV3_5G023970	Cysteine-rich repeat secretory protein like
CsaV3_5G010890	O-acetyl-ADP-ribose deacetylase
CsaV3_2G007400	protein NRT1/ PTR FAMILY 4.5-like
CsaV3_3G042070	EG2771
CsaV3_5G011190	Unknown protein
CsaV3_1G038020	glucan endo-1,3-beta-glucosidase 4
CsaV3_3G013710	WAG22 antigen
CsaV3_6G007700	40S ribosomal protein S27
CsaV3_1G041900	4-diphosphocytidyl-2-C-methyl-D-erythritol kinase
CsaV3_7G006230	Beta xylosidase
CsaV3_4G000210	Unknown protein
CsaV3_2G015110	Beta-galactosidase
CsaV3_3G043500	Chromatin assembly factor 1 subunit A, putative
CsaV3_7G034840	WAS/WASL-interacting family protein
CsaV3_1G042100	60S ribosomal protein L30
CsaV3_6G031790	Glutamate receptor
CsaV3_5G011210	RNA-dependent RNA polymerase
CsaV3_5G018650	Peptidyl-prolyl cis-trans isomerase
CsaV3_4G031920	Pentatricopeptide repeat-containing protein
CsaV3_3G039930	protein NRT1/ PTR FAMILY 3.1-like
CsaV3_5G014610	Unknown protein
CsaV3_5G001100	DUF819 domain-containing protein
CsaV3_4G008350	tRNA dimethylallyltransferase
CsaV3_7G006750	DNA replication licensing factor MCM9
CsaV3_6G014770	Phosphoglycerate mutase, putative
CsaV3_3G019570	DUF3082 domain-containing protein
CsaV3_5G027400	Gdsl esterase/lipase
CsaV3_3G038950	Squamosa promoter binding protein
CsaV3_5G039720	Pentatricopeptide (PPR) repeat protein-like
CsaV3_1G041110	subtilisin-like protease SBT1.8
CsaV3_5G002870	Holliday junction resolvase-like protein
CsaV3_4G005490	AAA-ATPase At3g50940
CsaV3_2G034150	fidgetin-like protein 1
CsaV3_3G039810	E3 ubiquitin-protein ligase At4g11680-like
CsaV3_1G032440	Unknown protein
CsaV3_7G006320	BAG family molecular chaperone regulator 7
CsaV3_6G000480	Riboflavin biosynthesis protein RibD
CsaV3_5G039350	Chlorophyll a-b binding protein, chloroplastic
CsaV3_1G017150	Inositol-1-monophosphatase
CsaV3_5G001370	Tumor necrosis factor receptor family protein
CsaV3_7G028460	39S ribosomal protein L46, mitochondrial-like
CsaV3_6G044730	Transcription factor bhlh93
[truncated: 10,257 more rows]

## Sheet: Total modules 
gene_id	module		190
CsaV3_1G000030	black		181
CsaV3_1G000150	black		259
CsaV3_1G000160	black		1141
CsaV3_1G000270	black		260
CsaV3_1G000720	black		625
CsaV3_1G000730	black		1617
CsaV3_1G000950	black		45
CsaV3_1G000970	black		528
CsaV3_1G000980	black		433
CsaV3_1G001080	black		181
CsaV3_1G001090	black		3296
CsaV3_1G001640	black		384
CsaV3_1G001800	black		1483
CsaV3_1G001910	black		83
CsaV3_1G002040	black		156
CsaV3_1G002050	black		701
CsaV3_1G002470	black		2149
CsaV3_1G002510	black		1615
CsaV3_1G002580	black		184
CsaV3_1G002600	black		123
CsaV3_1G003370	black		516
CsaV3_1G003480	black		464
CsaV3_1G003590	black		445
CsaV3_1G003710	black		2133
CsaV3_1G003820	black		259
CsaV3_1G003910	black		407
CsaV3_1G004090	black		621
CsaV3_1G004300	black		72
CsaV3_1G004620	black		766
CsaV3_1G004680	black		184
CsaV3_1G004840	black		241
CsaV3_1G005190	black		21742
CsaV3_1G005290	black
CsaV3_1G005610	black
CsaV3_1G005750	black
CsaV3_1G006060	black
CsaV3_1G006490	black
CsaV3_1G006660	black
CsaV3_1G006740	black
CsaV3_1G006750	black
CsaV3_1G007240	black
CsaV3_1G007540	black
CsaV3_1G007660	black
CsaV3_1G007830	black
CsaV3_1G007880	black
CsaV3_1G008340	black
CsaV3_1G008580	black
CsaV3_1G008870	black
CsaV3_1G009100	black
CsaV3_1G009120	black
CsaV3_1G009370	black
CsaV3_1G009380	black
CsaV3_1G009390	black
CsaV3_1G009400	black
CsaV3_1G009510	black
CsaV3_1G009520	black
CsaV3_1G009760	black
CsaV3_1G009910	black
CsaV3_1G010140	black
CsaV3_1G010220	black
CsaV3_1G010310	black
CsaV3_1G010320	black
CsaV3_1G010350	black
CsaV3_1G010410	black
CsaV3_1G010440	black
CsaV3_1G010460	black
CsaV3_1G010470	black
CsaV3_1G010860	black
CsaV3_1G011280	black
CsaV3_1G011350	black
CsaV3_1G011400	black
CsaV3_1G011460	black
CsaV3_1G011530	black
CsaV3_1G011610	black
CsaV3_1G011850	black
CsaV3_1G012070	black
CsaV3_1G012110	black
CsaV3_1G012900	black
CsaV3_1G013090	black
CsaV3_1G013100	black
CsaV3_1G013110	black
CsaV3_1G013410	black
CsaV3_1G013570	black
CsaV3_1G013860	black
CsaV3_1G013950	black
CsaV3_1G014550	black
CsaV3_1G014560	black
CsaV3_1G015300	black
CsaV3_1G015370	black
CsaV3_1G016940	black
CsaV3_1G016970	black
CsaV3_1G017190	black
CsaV3_1G020740	black
CsaV3_1G020760	black
CsaV3_1G020780	black
CsaV3_1G022870	black
CsaV3_1G024200	black
CsaV3_1G024260	black
CsaV3_1G024270	black
CsaV3_1G024330	black
CsaV3_1G024350	black
CsaV3_1G024360	black
CsaV3_1G024370	black
CsaV3_1G026600	black
CsaV3_1G027990	black
CsaV3_1G028060	black
CsaV3_1G028520	black
CsaV3_1G028670	black
CsaV3_1G028910	black
CsaV3_1G029230	black
CsaV3_1G029260	black
CsaV3_1G029310	black
CsaV3_1G029840	black
CsaV3_1G029880	black
CsaV3_1G030130	black
CsaV3_1G030320	black
CsaV3_1G030570	black
CsaV3_1G031040	black
CsaV3_1G031170	black
CsaV3_1G031220	black
CsaV3_1G031230	black
CsaV3_1G031280	black
CsaV3_1G031700	black
CsaV3_1G032040	black
CsaV3_1G032110	black
CsaV3_1G032230	black
CsaV3_1G032430	black
CsaV3_1G032860	black
CsaV3_1G033260	black
CsaV3_1G033490	black
CsaV3_1G033500	black
CsaV3_1G033600	black
CsaV3_1G033690	black
CsaV3_1G033700	black
CsaV3_1G034630	black
CsaV3_1G035720	black
CsaV3_1G035740	black
CsaV3_1G036130	black
CsaV3_1G036270	black
CsaV3_1G036340	black
CsaV3_1G036480	black
CsaV3_1G036660	black
CsaV3_1G036680	black
CsaV3_1G037070	black
CsaV3_1G037390	black
CsaV3_1G037510	black
CsaV3_1G037680	black
CsaV3_1G037710	black
CsaV3_1G038080	black
CsaV3_1G038180	black
CsaV3_1G038190	black
CsaV3_1G038350	black
CsaV3_1G038400	black
CsaV3_1G038420	black
CsaV3_1G038470	black
CsaV3_1G038540	black
CsaV3_1G039100	black
CsaV3_1G039520	black
CsaV3_1G039540	black
CsaV3_1G039550	black
CsaV3_1G039720	black
CsaV3_1G039800	black
CsaV3_1G039850	black
CsaV3_1G040000	black
CsaV3_1G040200	black
CsaV3_1G040400	black
CsaV3_1G040550	black
CsaV3_1G041010	black
CsaV3_1G041150	black
CsaV3_1G041370	black
CsaV3_1G041510	black
CsaV3_1G042080	black
CsaV3_1G042410	black
CsaV3_1G043570	black
CsaV3_1G043640	black
CsaV3_1G044640	black
CsaV3_1G044860	black
CsaV3_1G045060	black
CsaV3_1G045100	black
CsaV3_1G045320	black
CsaV3_1G046000	black
CsaV3_1G046060	black
CsaV3_1G046440	black
CsaV3_1G046510	black
CsaV3_1G046620	black
CsaV3_2G001210	black
CsaV3_2G001820	black
CsaV3_2G001890	black
CsaV3_2G002030	black
CsaV3_2G002070	black
CsaV3_2G002090	black
CsaV3_2G002410	black
CsaV3_2G003140	black
CsaV3_2G003160	black
CsaV3_2G003280	black
CsaV3_2G003370	black
CsaV3_2G004160	black
CsaV3_2G004770	black
CsaV3_2G004800	black
CsaV3_2G004830	black
CsaV3_2G004950	black
CsaV3_2G005000	black
CsaV3_2G005010	black
CsaV3_2G005290	black
CsaV3_2G005350	black
CsaV3_2G005360	black
CsaV3_2G006420	black
CsaV3_2G006790	black
CsaV3_2G007090	black
CsaV3_2G007440	black
CsaV3_2G008080	black
CsaV3_2G008180	black
CsaV3_2G008330	black
CsaV3_2G008640	black
CsaV3_2G008670	black
CsaV3_2G008700	black
CsaV3_2G008710	black
CsaV3_2G009140	black
CsaV3_2G009540	black
CsaV3_2G009560	black
CsaV3_2G009750	black
CsaV3_2G010060	black
CsaV3_2G010100	black
CsaV3_2G010760	black
CsaV3_2G010860	black
CsaV3_2G011000	black
CsaV3_2G011240	black
CsaV3_2G011430	black
CsaV3_2G011450	black
CsaV3_2G012490	black
CsaV3_2G012820	black
CsaV3_2G012980	black
CsaV3_2G013210	black
CsaV3_2G013570	black
CsaV3_2G013690	black
CsaV3_2G014140	black
CsaV3_2G014410	black
CsaV3_2G014630	black
CsaV3_2G014640	black
CsaV3_2G014890	black
CsaV3_2G014900	black
CsaV3_2G015390	black
CsaV3_2G015410	black
CsaV3_2G015450	black
CsaV3_2G015520	black
CsaV3_2G015530	black
CsaV3_2G015820	black
CsaV3_2G016300	black
CsaV3_2G016310	black
CsaV3_2G016810	black
CsaV3_2G016990	black
CsaV3_2G017000	black
CsaV3_2G017070	black
CsaV3_2G017320	black
CsaV3_2G017450	black
CsaV3_2G017560	black
CsaV3_2G017630	black
CsaV3_2G017660	black
CsaV3_2G017870	black
CsaV3_2G018070	black
CsaV3_2G018150	black
CsaV3_2G018240	black
CsaV3_2G019460	black
CsaV3_2G020840	black
CsaV3_2G021090	black
CsaV3_2G022180	black
CsaV3_2G024350	black
CsaV3_2G024930	black
CsaV3_2G024940	black
CsaV3_2G024970	black
CsaV3_2G024980	black
CsaV3_2G025390	black
CsaV3_2G025550	black
CsaV3_2G025690	black
CsaV3_2G025780	black
CsaV3_2G025790	black
CsaV3_2G025800	black
CsaV3_2G026100	black
CsaV3_2G026540	black
CsaV3_2G026630	black
CsaV3_2G027820	black
CsaV3_2G028090	black
CsaV3_2G028100	black
CsaV3_2G028230	black
CsaV3_2G028790	black
CsaV3_2G028840	black
CsaV3_2G029010	black
CsaV3_2G029230	black
CsaV3_2G029410	black
CsaV3_2G029470	black
CsaV3_2G029530	black
CsaV3_2G029570	black
CsaV3_2G029990	black
CsaV3_2G030270	black
CsaV3_2G030320	black
CsaV3_2G030660	black
CsaV3_2G030770	black
CsaV3_2G030910	black
CsaV3_2G030940	black
CsaV3_2G031340	black
CsaV3_2G031400	black
CsaV3_2G031720	black
CsaV3_2G031780	black
CsaV3_2G032070	black
CsaV3_2G032130	black
CsaV3_2G032150	black
CsaV3_2G032390	black
CsaV3_2G032490	black
CsaV3_2G033060	black
CsaV3_2G033450	black
CsaV3_2G033710	black
CsaV3_2G033930	black
CsaV3_2G034030	black
CsaV3_2G034070	black
CsaV3_2G034090	black
CsaV3_2G034100	black
CsaV3_2G034410	black
CsaV3_2G034560	black
CsaV3_2G034570	black
CsaV3_2G034660	black
CsaV3_2G034970	black
CsaV3_2G035010	black
CsaV3_2G035020	black
CsaV3_2G035110	black
CsaV3_2G035120	black
CsaV3_2G035500	black
CsaV3_2G036080	black
CsaV3_2G036310	black
CsaV3_2G036350	black
CsaV3_2G036410	black
CsaV3_2G036440	black
CsaV3_2G036560	black
CsaV3_3G000020	black
CsaV3_3G000040	black
CsaV3_3G000160	black
CsaV3_3G000190	black
CsaV3_3G000480	black
CsaV3_3G000560	black
CsaV3_3G000870	black
CsaV3_3G000880	black
CsaV3_3G000970	black
CsaV3_3G001330	black
CsaV3_3G001760	black
CsaV3_3G001980	black
CsaV3_3G002230	black
CsaV3_3G003200	black
CsaV3_3G003340	black
CsaV3_3G003590	black
CsaV3_3G003660	black
CsaV3_3G003870	black
CsaV3_3G004100	black
CsaV3_3G004480	black
CsaV3_3G004620	black
CsaV3_3G004840	black
CsaV3_3G004980	black
CsaV3_3G005080	black
CsaV3_3G005290	black
CsaV3_3G005590	black
CsaV3_3G005860	black
CsaV3_3G006130	black
CsaV3_3G006480	black
CsaV3_3G006880	black
CsaV3_3G007010	black
CsaV3_3G007520	black
CsaV3_3G007970	black
CsaV3_3G008480	black
CsaV3_3G008720	black
CsaV3_3G008730	black
CsaV3_3G009180	black
CsaV3_3G009250	black
CsaV3_3G009480	black
CsaV3_3G009720	black
CsaV3_3G009850	black
CsaV3_3G009870	black
CsaV3_3G010180	black
CsaV3_3G011010	black
CsaV3_3G011470	black
CsaV3_3G011780	black
CsaV3_3G011840	black
CsaV3_3G012510	black
CsaV3_3G012580	black
CsaV3_3G012810	black
CsaV3_3G013290	black
CsaV3_3G013440	black
CsaV3_3G013450	black
CsaV3_3G013830	black
CsaV3_3G013980	black
CsaV3_3G014160	black
CsaV3_3G015320	black
CsaV3_3G015640	black
CsaV3_3G015650	black
CsaV3_3G015950	black
CsaV3_3G016220	black
CsaV3_3G016310	black
CsaV3_3G017680	black
CsaV3_3G018050	black
CsaV3_3G018200	black
CsaV3_3G018620	black
CsaV3_3G019660	black
CsaV3_3G019920	black
CsaV3_3G020120	black
CsaV3_3G020310	black
CsaV3_3G020920	black
CsaV3_3G020940	black
CsaV3_3G021150	black
CsaV3_3G021350	black
CsaV3_3G021380	black
CsaV3_3G021900	black
CsaV3_3G021920	black
CsaV3_3G022000	black
CsaV3_3G022150	black
CsaV3_3G022230	black
CsaV3_3G022850	black
CsaV3_3G023430	black
CsaV3_3G023510	black
CsaV3_3G023550	black
CsaV3_3G023560	black
CsaV3_3G023600	black
CsaV3_3G024990	black
CsaV3_3G026350	black
CsaV3_3G026410	black
CsaV3_3G026610	black
CsaV3_3G026730	black
CsaV3_3G027500	black
CsaV3_3G027760	black
CsaV3_3G027850	black
CsaV3_3G027870	black
CsaV3_3G030080	black
CsaV3_3G031490	black
CsaV3_3G032100	black
CsaV3_3G032480	black
CsaV3_3G032580	black
CsaV3_3G032590	black
CsaV3_3G032720	black
CsaV3_3G032730	black
CsaV3_3G032920	black
CsaV3_3G033060	black
CsaV3_3G033390	black
CsaV3_3G034000	black
CsaV3_3G034020	black
CsaV3_3G034460	black
CsaV3_3G034590	black
CsaV3_3G034800	black
CsaV3_3G035100	black
CsaV3_3G035190	black
CsaV3_3G035330	black
CsaV3_3G035380	black
CsaV3_3G035690	black
CsaV3_3G035720	black
CsaV3_3G035740	black
CsaV3_3G035790	black
CsaV3_3G036020	black
CsaV3_3G036040	black
CsaV3_3G036270	black
CsaV3_3G036310	black
CsaV3_3G036630	black
CsaV3_3G036850	black
CsaV3_3G036900	black
CsaV3_3G037630	black
CsaV3_3G037740	black
CsaV3_3G037930	black
CsaV3_3G038180	black
CsaV3_3G038240	black
CsaV3_3G038510	black
CsaV3_3G039160	black
CsaV3_3G039870	black
CsaV3_3G039900	black
CsaV3_3G040040	black
CsaV3_3G040180	black
CsaV3_3G040280	black
CsaV3_3G040310	black
CsaV3_3G040570	black
CsaV3_3G040580	black
CsaV3_3G040640	black
CsaV3_3G040810	black
CsaV3_3G041280	black
CsaV3_3G041340	black
CsaV3_3G041360	black
CsaV3_3G041400	black
CsaV3_3G041510	black
CsaV3_3G042160	black
CsaV3_3G042520	black
CsaV3_3G043180	black
CsaV3_3G043210	black
CsaV3_3G043670	black
CsaV3_3G043700	black
CsaV3_3G043890	black
CsaV3_3G043920	black
CsaV3_3G043940	black
CsaV3_3G043950	black
CsaV3_3G044010	black
CsaV3_3G044440	black
CsaV3_3G044540	black
CsaV3_3G044670	black
CsaV3_3G044700	black
CsaV3_3G044740	black
CsaV3_3G044850	black
CsaV3_3G044910	black
CsaV3_3G044920	black
CsaV3_3G045250	black
CsaV3_3G045290	black
CsaV3_3G045300	black
CsaV3_3G045320	black
CsaV3_3G045970	black
CsaV3_3G046090	black
CsaV3_3G046350	black
CsaV3_3G046370	black
CsaV3_3G046530	black
CsaV3_3G047150	black
CsaV3_3G047400	black
CsaV3_3G047440	black
CsaV3_3G047790	black
CsaV3_3G047950	black
CsaV3_3G049430	black
CsaV3_3G049530	black
CsaV3_3G049910	black
CsaV3_3G050110	black
CsaV3_4G000110	black
CsaV3_4G000290	black
CsaV3_4G000300	black
CsaV3_4G000310	black
CsaV3_4G000350	black
CsaV3_4G000440	black
CsaV3_4G000850	black
CsaV3_4G000920	black
CsaV3_4G001120	black
CsaV3_4G001190	black
CsaV3_4G001420	black
CsaV3_4G001550	black
CsaV3_4G002080	black
CsaV3_4G003030	black
CsaV3_4G003070	black
CsaV3_4G003080	black
CsaV3_4G003170	black
CsaV3_4G003260	black
CsaV3_4G003350	black
CsaV3_4G003490	black
CsaV3_4G003880	black
CsaV3_4G003960	black
CsaV3_4G003970	black
CsaV3_4G004100	black
CsaV3_4G004380	black
CsaV3_4G004750	black
CsaV3_4G004770	black
CsaV3_4G004890	black
CsaV3_4G004910	black
CsaV3_4G005240	black
CsaV3_4G005260	black
CsaV3_4G005480	black
CsaV3_4G005680	black
CsaV3_4G005980	black
CsaV3_4G006280	black
CsaV3_4G006840	black
CsaV3_4G006940	black
CsaV3_4G007090	black
CsaV3_4G007290	black
CsaV3_4G007660	black
CsaV3_4G007680	black
CsaV3_4G007810	black
CsaV3_4G007930	black
CsaV3_4G007990	black
CsaV3_4G008480	black
CsaV3_4G009060	black
CsaV3_4G009160	black
CsaV3_4G009640	black
CsaV3_4G009650	black
CsaV3_4G009980	black
CsaV3_4G010190	black
CsaV3_4G010220	black
CsaV3_4G010230	black
CsaV3_4G010350	black
CsaV3_4G010460	black
CsaV3_4G011850	black
CsaV3_4G014780	black
CsaV3_4G017510	black
CsaV3_4G021930	black
CsaV3_4G023470	black
CsaV3_4G023730	black
CsaV3_4G023880	black
CsaV3_4G023910	black
CsaV3_4G023950	black
CsaV3_4G023960	black
CsaV3_4G023970	black
CsaV3_4G024600	black
CsaV3_4G024790	black
CsaV3_4G024920	black
CsaV3_4G025090	black
CsaV3_4G025240	black
CsaV3_4G025390	black
CsaV3_4G025460	black
CsaV3_4G025470	black
CsaV3_4G025530	black
CsaV3_4G026300	black
CsaV3_4G026330	black
CsaV3_4G026410	black
CsaV3_4G026670	black
CsaV3_4G027810	black
CsaV3_4G027860	black
CsaV3_4G028180	black
CsaV3_4G028650	black
CsaV3_4G028700	black
CsaV3_4G028830	black
CsaV3_4G028850	black
CsaV3_4G028900	black
CsaV3_4G028990	black
CsaV3_4G029130	black
CsaV3_4G029180	black
CsaV3_4G029190	black
CsaV3_4G029220	black
CsaV3_4G029320	black
CsaV3_4G029330	black
CsaV3_4G029440	black
CsaV3_4G029540	black
CsaV3_4G029880	black
CsaV3_4G030130	black
CsaV3_4G030140	black
CsaV3_4G030340	black
CsaV3_4G030350	black
CsaV3_4G030360	black
CsaV3_4G030460	black
CsaV3_4G030550	black
CsaV3_4G030560	black
CsaV3_4G030690	black
CsaV3_4G031240	black
CsaV3_4G031990	black
CsaV3_4G032020	black
CsaV3_4G032280	black
CsaV3_4G032380	black
CsaV3_4G032810	black
CsaV3_4G032960	black
CsaV3_4G033040	black
CsaV3_4G033160	black
CsaV3_4G033560	black
CsaV3_4G033850	black
CsaV3_4G034320	black
CsaV3_4G034420	black
CsaV3_4G034440	black
CsaV3_4G034560	black
CsaV3_4G034650	black
CsaV3_4G035160	black
CsaV3_4G035880	black
CsaV3_4G036100	black
CsaV3_4G036170	black
CsaV3_4G036350	black
CsaV3_4G036590	black
CsaV3_4G036760	black
CsaV3_4G036880	black
CsaV3_4G037260	black
CsaV3_4G037490	black
CsaV3_4G037590	black
CsaV3_4G038020	black
CsaV3_5G000220	black
CsaV3_5G000330	black
CsaV3_5G000810	black
CsaV3_5G001620	black
CsaV3_5G001880	black
CsaV3_5G001890	black
CsaV3_5G002040	black
CsaV3_5G003490	black
CsaV3_5G003550	black
CsaV3_5G003560	black
CsaV3_5G003570	black
CsaV3_5G003590	black
CsaV3_5G003620	black
CsaV3_5G003930	black
CsaV3_5G004120	black
CsaV3_5G004130	black
CsaV3_5G004250	black
CsaV3_5G004580	black
CsaV3_5G004760	black
CsaV3_5G004830	black
CsaV3_5G004860	black
CsaV3_5G004890	black
CsaV3_5G005160	black
CsaV3_5G005210	black
CsaV3_5G005220	black
CsaV3_5G005230	black
CsaV3_5G005240	black
CsaV3_5G005800	black
CsaV3_5G005810	black
CsaV3_5G005840	black
CsaV3_5G005910	black
CsaV3_5G005930	black
CsaV3_5G006040	black
CsaV3_5G006250	black
CsaV3_5G006290	black
CsaV3_5G006350	black
CsaV3_5G006620	black
CsaV3_5G008280	black
CsaV3_5G008320	black
CsaV3_5G008410	black
CsaV3_5G008870	black
CsaV3_5G008940	black
CsaV3_5G010150	black
CsaV3_5G010810	black
CsaV3_5G011160	black
CsaV3_5G011220	black
CsaV3_5G012310	black
CsaV3_5G012630	black
CsaV3_5G012930	black
CsaV3_5G013360	black
CsaV3_5G013390	black
CsaV3_5G013610	black
CsaV3_5G013880	black
CsaV3_5G014030	black
CsaV3_5G014370	black
CsaV3_5G014560	black
CsaV3_5G014570	black
CsaV3_5G014580	black
CsaV3_5G014630	black
CsaV3_5G014750	black
CsaV3_5G014940	black
CsaV3_5G015750	black
CsaV3_5G015880	black
CsaV3_5G015940	black
CsaV3_5G015950	black
CsaV3_5G017160	black
CsaV3_5G017490	black
CsaV3_5G020250	black
CsaV3_5G020270	black
CsaV3_5G020280	black
CsaV3_5G020300	black
CsaV3_5G023130	black
CsaV3_5G023160	black
CsaV3_5G023230	black
CsaV3_5G023700	black
CsaV3_5G023840	black
CsaV3_5G023950	black
CsaV3_5G024690	black
CsaV3_5G025120	black
CsaV3_5G025300	black
CsaV3_5G025410	black
CsaV3_5G025430	black
CsaV3_5G025590	black
CsaV3_5G025830	black
CsaV3_5G026240	black
CsaV3_5G026540	black
CsaV3_5G026550	black
CsaV3_5G026650	black
CsaV3_5G027160	black
CsaV3_5G027270	black
CsaV3_5G028090	black
CsaV3_5G028130	black
CsaV3_5G028140	black
CsaV3_5G028510	black
CsaV3_5G028910	black
CsaV3_5G029050	black
CsaV3_5G029250	black
CsaV3_5G029290	black
CsaV3_5G029370	black
CsaV3_5G029730	black
CsaV3_5G029780	black
CsaV3_5G030330	black
CsaV3_5G030380	black
CsaV3_5G030740	black
CsaV3_5G030780	black
CsaV3_5G030820	black
CsaV3_5G031600	black
CsaV3_5G031700	black
CsaV3_5G031740	black
CsaV3_5G031760	black
CsaV3_5G032360	black
CsaV3_5G032390	black
CsaV3_5G032400	black
CsaV3_5G032540	black
CsaV3_5G032680	black
CsaV3_5G032720	black
CsaV3_5G032730	black
CsaV3_5G032900	black
CsaV3_5G032910	black
CsaV3_5G032930	black
CsaV3_5G033270	black
CsaV3_5G033350	black
CsaV3_5G033390	black
CsaV3_5G033640	black
CsaV3_5G033660	black
CsaV3_5G033840	black
CsaV3_5G034020	black
CsaV3_5G034100	black
CsaV3_5G034110	black
CsaV3_5G034140	black
CsaV3_5G034200	black
CsaV3_5G034400	black
CsaV3_5G034700	black
CsaV3_5G034710	black
CsaV3_5G034960	black
CsaV3_5G035120	black
CsaV3_5G035340	black
CsaV3_5G035350	black
CsaV3_5G035400	black
CsaV3_5G035880	black
CsaV3_5G035920	black
CsaV3_5G035930	black
CsaV3_5G036080	black
CsaV3_5G036210	black
CsaV3_5G036460	black
CsaV3_5G036640	black
CsaV3_5G036720	black
CsaV3_5G036740	black
CsaV3_5G036860	black
CsaV3_5G037050	black
CsaV3_5G037560	black
CsaV3_5G037700	black
CsaV3_5G037720	black
CsaV3_5G037850	black
CsaV3_5G038110	black
CsaV3_5G038170	black
CsaV3_5G038380	black
CsaV3_5G038760	black
CsaV3_5G038920	black
CsaV3_5G039110	black
CsaV3_5G039480	black
CsaV3_5G039830	black
CsaV3_5G040240	black
CsaV3_5G040310	black
CsaV3_5G040410	black
CsaV3_6G000250	black
CsaV3_6G000440	black
CsaV3_6G000810	black
CsaV3_6G001620	black
CsaV3_6G001940	black
CsaV3_6G002230	black
CsaV3_6G003110	black
CsaV3_6G003140	black
CsaV3_6G003240	black
CsaV3_6G003410	black
CsaV3_6G003700	black
CsaV3_6G004020	black
CsaV3_6G004460	black
CsaV3_6G005630	black
CsaV3_6G005730	black
CsaV3_6G005740	black
CsaV3_6G006010	black
CsaV3_6G006020	black
CsaV3_6G006130	black
CsaV3_6G006140	black
CsaV3_6G006430	black
CsaV3_6G006790	black
CsaV3_6G006940	black
CsaV3_6G006950	black
CsaV3_6G006960	black
CsaV3_6G006980	black
CsaV3_6G006990	black
CsaV3_6G007920	black
CsaV3_6G007950	black
CsaV3_6G008070	black
CsaV3_6G008080	black
CsaV3_6G008150	black
CsaV3_6G008190	black
CsaV3_6G008270	black
CsaV3_6G008940	black
CsaV3_6G009000	black
CsaV3_6G009080	black
CsaV3_6G009430	black
CsaV3_6G009850	black
CsaV3_6G009990	black
CsaV3_6G010130	black
CsaV3_6G012600	black
CsaV3_6G012660	black
CsaV3_6G012880	black
CsaV3_6G013340	black
CsaV3_6G013600	black
CsaV3_6G013820	black
CsaV3_6G013840	black
CsaV3_6G013870	black
CsaV3_6G013950	black
CsaV3_6G014000	black
CsaV3_6G014110	black
CsaV3_6G014350	black
CsaV3_6G014920	black
CsaV3_6G014930	black
CsaV3_6G015040	black
CsaV3_6G015080	black
CsaV3_6G015090	black
CsaV3_6G015390	black
CsaV3_6G015950	black
CsaV3_6G016000	black
CsaV3_6G016220	black
CsaV3_6G016250	black
CsaV3_6G016260	black
CsaV3_6G016360	black
CsaV3_6G016440	black
CsaV3_6G016800	black
CsaV3_6G017100	black
CsaV3_6G017310	black
CsaV3_6G017370	black
CsaV3_6G017410	black
CsaV3_6G018620	black
CsaV3_6G018640	black
CsaV3_6G018650	black
CsaV3_6G018900	black
CsaV3_6G021220	black
CsaV3_6G021710	black
CsaV3_6G022010	black
CsaV3_6G022480	black
CsaV3_6G022500	black
CsaV3_6G022560	black
CsaV3_6G022570	black
CsaV3_6G022730	black
CsaV3_6G025280	black
CsaV3_6G028530	black
CsaV3_6G031150	black
CsaV3_6G031690	black
CsaV3_6G031910	black
CsaV3_6G032150	black
CsaV3_6G034230	black
CsaV3_6G034530	black
CsaV3_6G035540	black
CsaV3_6G035650	black
CsaV3_6G036330	black
CsaV3_6G036400	black
CsaV3_6G036420	black
CsaV3_6G036910	black
CsaV3_6G036920	black
CsaV3_6G037840	black
CsaV3_6G038030	black
CsaV3_6G038040	black
CsaV3_6G038160	black
CsaV3_6G038210	black
CsaV3_6G038370	black
CsaV3_6G038530	black
CsaV3_6G038880	black
CsaV3_6G038960	black
CsaV3_6G039040	black
CsaV3_6G039320	black
CsaV3_6G039830	black
CsaV3_6G040010	black
CsaV3_6G040210	black
CsaV3_6G040230	black
CsaV3_6G040380	black
CsaV3_6G040470	black
CsaV3_6G041270	black
CsaV3_6G041410	black
CsaV3_6G041490	black
CsaV3_6G041790	black
CsaV3_6G041820	black
CsaV3_6G041890	black
CsaV3_6G041900	black
CsaV3_6G041910	black
CsaV3_6G042480	black
CsaV3_6G042690	black
CsaV3_6G042940	black
CsaV3_6G043110	black
CsaV3_6G043240	black
CsaV3_6G043490	black
CsaV3_6G043650	black
CsaV3_6G043690	black
CsaV3_6G044200	black
CsaV3_6G044490	black
CsaV3_6G044900	black
CsaV3_6G044910	black
CsaV3_6G045620	black
CsaV3_6G045720	black
CsaV3_6G045850	black
CsaV3_6G045870	black
CsaV3_6G045880	black
CsaV3_6G045890	black
CsaV3_6G045990	black
CsaV3_6G046020	black
CsaV3_6G046050	black
CsaV3_6G046060	black
CsaV3_6G046070	black
CsaV3_6G046080	black
CsaV3_6G046220	black
CsaV3_6G046850	black
CsaV3_6G046900	black
CsaV3_6G047470	black
CsaV3_6G047500	black
CsaV3_6G047570	black
CsaV3_6G047920	black
CsaV3_6G048140	black
CsaV3_6G048700	black
CsaV3_6G048830	black
CsaV3_6G048880	black
CsaV3_6G049160	black
CsaV3_6G049240	black
CsaV3_6G049330	black
CsaV3_6G049380	black
CsaV3_6G049390	black
CsaV3_6G049650	black
CsaV3_6G050010	black
CsaV3_6G050150	black
CsaV3_6G050180	black
CsaV3_6G050350	black
CsaV3_6G050370	black
CsaV3_6G050420	black
CsaV3_6G050430	black
CsaV3_6G050770	black
CsaV3_6G050940	black
CsaV3_6G050990	black
CsaV3_6G051250	black
CsaV3_6G051370	black
CsaV3_6G051710	black
CsaV3_6G051770	black
CsaV3_6G052130	black
CsaV3_6G052420	black
CsaV3_6G052530	black
CsaV3_6G053070	black
CsaV3_7G000320	black
CsaV3_7G000610	black
CsaV3_7G000620	black
CsaV3_7G000950	black
CsaV3_7G001290	black
CsaV3_7G001300	black
CsaV3_7G001310	black
CsaV3_7G001330	black
CsaV3_7G001520	black
CsaV3_7G001550	black
CsaV3_7G001600	black
CsaV3_7G001610	black
CsaV3_7G001850	black
CsaV3_7G001880	black
CsaV3_7G002070	black
CsaV3_7G002220	black
CsaV3_7G002300	black
CsaV3_7G002560	black
CsaV3_7G002580	black
CsaV3_7G002700	black
CsaV3_7G002960	black
CsaV3_7G003150	black
CsaV3_7G003360	black
CsaV3_7G003520	black
CsaV3_7G003690	black
CsaV3_7G003880	black
CsaV3_7G005710	black
CsaV3_7G005990	black
CsaV3_7G006120	black
CsaV3_7G006580	black
CsaV3_7G006620	black
CsaV3_7G006630	black
CsaV3_7G006780	black
CsaV3_7G006790	black
CsaV3_7G007000	black
CsaV3_7G007160	black
CsaV3_7G007270	black
CsaV3_7G007480	black
CsaV3_7G007490	black
CsaV3_7G007630	black
CsaV3_7G008160	black
CsaV3_7G008360	black
CsaV3_7G008920	black
CsaV3_7G010080	black
CsaV3_7G014990	black
CsaV3_7G015020	black
CsaV3_7G015070	black
CsaV3_7G018510	black
CsaV3_7G018520	black
CsaV3_7G019950	black
CsaV3_7G021100	black
CsaV3_7G021130	black
CsaV3_7G021380	black
CsaV3_7G021440	black
CsaV3_7G021810	black
CsaV3_7G022030	black
CsaV3_7G022200	black
CsaV3_7G022480	black
CsaV3_7G022490	black
CsaV3_7G022630	black
CsaV3_7G022750	black
CsaV3_7G022810	black
CsaV3_7G022850	black
CsaV3_7G023440	black
CsaV3_7G023610	black
CsaV3_7G023620	black
CsaV3_7G023670	black
CsaV3_7G024350	black
CsaV3_7G024770	black
CsaV3_7G025260	black
CsaV3_7G025300	black
CsaV3_7G025420	black
CsaV3_7G025600	black
CsaV3_7G026300	black
CsaV3_7G026320	black
CsaV3_7G026520	black
CsaV3_7G026660	black
CsaV3_7G027040	black
CsaV3_7G027450	black
CsaV3_7G027650	black
CsaV3_7G027670	black
CsaV3_7G028090	black
CsaV3_7G028330	black
CsaV3_7G028420	black
CsaV3_7G028610	black
CsaV3_7G029270	black
CsaV3_7G029450	black
CsaV3_7G029770	black
CsaV3_7G030010	black
CsaV3_7G030150	black
CsaV3_7G030160	black
CsaV3_7G030230	black
CsaV3_7G030240	black
CsaV3_7G030580	black
CsaV3_7G030860	black
CsaV3_7G031260	black
CsaV3_7G032220	black
CsaV3_7G032230	black
CsaV3_7G032370	black
CsaV3_7G032380	black
CsaV3_7G032390	black
CsaV3_7G032540	black
CsaV3_7G032550	black
CsaV3_7G032570	black
CsaV3_7G032970	black
CsaV3_7G033350	black
CsaV3_7G034170	black
CsaV3_7G034600	black
CsaV3_7G034730	black
CsaV3_7G034990	black
CsaV3_7G035040	black
CsaV3_7G035360	black
CsaV3_UNG000020	black
CsaV3_UNG010110	black
CsaV3_UNG013130	black
CsaV3_UNG049340	black
CsaV3_UNG051400	black
CsaV3_UNG052410	black
CsaV3_UNG059470	black
CsaV3_UNG091710	black
CsaV3_UNG095720	black
CsaV3_UNG099740	black
CsaV3_UNG115940	black
CsaV3_UNG116960	black
CsaV3_UNG128990	black
CsaV3_UNG137060	black
CsaV3_UNG146120	black
CsaV3_UNG160190	black
CsaV3_UNG183400	black
CsaV3_UNG183410	black
CsaV3_UNG193490	black
CsaV3_UNG207980	black
CsaV3_UNG208720	black
CsaV3_UNG209140	black
CsaV3_UNG209250	black
CsaV3_UNG213460	black
CsaV3_UNG223610	black
CsaV3_UNG223620	black
CsaV3_UNG223630	black
CsaV3_UNG228990	black
CsaV3_UNG232170	black
CsaV3_UNG233340	black
CsaV3_UNG234380	black
CsaV3_1G000060	blue
CsaV3_1G000250	blue
CsaV3_1G000260	blue
CsaV3_1G000490	blue
CsaV3_1G000500	blue
CsaV3_1G000640	blue
CsaV3_1G001260	blue
CsaV3_1G001390	blue
CsaV3_1G001460	blue
CsaV3_1G001470	blue
CsaV3_1G001530	blue
CsaV3_1G001590	blue
CsaV3_1G001880	blue
CsaV3_1G001920	blue
CsaV3_1G002000	blue
CsaV3_1G002030	blue
CsaV3_1G002080	blue
CsaV3_1G002200	blue
CsaV3_1G002300	blue
CsaV3_1G002500	blue
CsaV3_1G002520	blue
CsaV3_1G002530	blue
CsaV3_1G002620	blue
CsaV3_1G002820	blue
CsaV3_1G002980	blue
CsaV3_1G003060	blue
CsaV3_1G003330	blue
CsaV3_1G003340	blue
CsaV3_1G003360	blue
CsaV3_1G003500	blue
CsaV3_1G003950	blue
CsaV3_1G003980	blue
CsaV3_1G004360	blue
CsaV3_1G004390	blue
CsaV3_1G004500	blue
CsaV3_1G004610	blue
CsaV3_1G004750	blue
CsaV3_1G004860	blue
CsaV3_1G004940	blue
CsaV3_1G004970	blue
CsaV3_1G005040	blue
CsaV3_1G005110	blue
CsaV3_1G005430	blue
CsaV3_1G005440	blue
CsaV3_1G005460	blue
CsaV3_1G005560	blue
CsaV3_1G005620	blue
CsaV3_1G005650	blue
CsaV3_1G005950	blue
CsaV3_1G006000	blue
CsaV3_1G006130	blue
CsaV3_1G006210	blue
CsaV3_1G006230	blue
CsaV3_1G006290	blue
CsaV3_1G006420	blue
CsaV3_1G006530	blue
CsaV3_1G006590	blue
CsaV3_1G006820	blue
CsaV3_1G006990	blue
CsaV3_1G007070	blue
CsaV3_1G007350	blue
CsaV3_1G007440	blue
CsaV3_1G007450	blue
CsaV3_1G007460	blue
CsaV3_1G007510	blue
CsaV3_1G007570	blue
CsaV3_1G007710	blue
CsaV3_1G008300	blue
CsaV3_1G008320	blue
CsaV3_1G008380	blue
CsaV3_1G008520	blue
CsaV3_1G008600	blue
CsaV3_1G008820	blue
CsaV3_1G009040	blue
CsaV3_1G009080	blue
CsaV3_1G009260	blue
CsaV3_1G009770	blue
CsaV3_1G009950	blue
CsaV3_1G009980	blue
CsaV3_1G010020	blue
CsaV3_1G010190	blue
CsaV3_1G010200	blue
CsaV3_1G010340	blue
CsaV3_1G010670	blue
CsaV3_1G010770	blue
CsaV3_1G011040	blue
CsaV3_1G011780	blue
CsaV3_1G011930	blue
CsaV3_1G012170	blue
CsaV3_1G012250	blue
CsaV3_1G012310	blue
CsaV3_1G012400	blue
CsaV3_1G012430	blue
CsaV3_1G012560	blue
CsaV3_1G012710	blue
CsaV3_1G012770	blue
CsaV3_1G012810	blue
CsaV3_1G012830	blue
CsaV3_1G012860	blue
CsaV3_1G012950	blue
CsaV3_1G012960	blue
CsaV3_1G013010	blue
CsaV3_1G013020	blue
CsaV3_1G013040	blue
CsaV3_1G013160	blue
CsaV3_1G013270	blue
CsaV3_1G013310	blue
CsaV3_1G013420	blue
CsaV3_1G013520	blue
CsaV3_1G013870	blue
CsaV3_1G014440	blue
CsaV3_1G014460	blue
CsaV3_1G015050	blue
CsaV3_1G015360	blue
CsaV3_1G015560	blue
CsaV3_1G015910	blue
CsaV3_1G015940	blue
CsaV3_1G016980	blue
CsaV3_1G017090	blue
CsaV3_1G017280	blue
CsaV3_1G019510	blue
CsaV3_1G019690	blue
CsaV3_1G020790	blue
CsaV3_1G021840	blue
CsaV3_1G021870	blue
CsaV3_1G022880	blue
CsaV3_1G022910	blue
CsaV3_1G022970	blue
CsaV3_1G023000	blue
CsaV3_1G023010	blue
CsaV3_1G024170	blue
CsaV3_1G024300	blue
CsaV3_1G027870	blue
CsaV3_1G027950	blue
CsaV3_1G028290	blue
CsaV3_1G028300	blue
CsaV3_1G028340	blue
CsaV3_1G028430	blue
CsaV3_1G028550	blue
CsaV3_1G028590	blue
CsaV3_1G028630	blue
CsaV3_1G028980	blue
CsaV3_1G029080	blue
CsaV3_1G029210	blue
CsaV3_1G029300	blue
CsaV3_1G029570	blue
CsaV3_1G030000	blue
CsaV3_1G030360	blue
CsaV3_1G030700	blue
CsaV3_1G030900	blue
CsaV3_1G030920	blue
CsaV3_1G031140	blue
CsaV3_1G031290	blue
CsaV3_1G031350	blue
CsaV3_1G031760	blue
CsaV3_1G031880	blue
CsaV3_1G031940	blue
CsaV3_1G031990	blue
CsaV3_1G032010	blue
CsaV3_1G032060	blue
CsaV3_1G032150	blue
CsaV3_1G032460	blue
CsaV3_1G032470	blue
CsaV3_1G032690	blue
CsaV3_1G032770	blue
CsaV3_1G032980	blue
CsaV3_1G033050	blue
CsaV3_1G033100	blue
CsaV3_1G033140	blue
CsaV3_1G033210	blue
CsaV3_1G033230	blue
CsaV3_1G033280	blue
CsaV3_1G033380	blue
CsaV3_1G033410	blue
CsaV3_1G033470	blue
CsaV3_1G033510	blue
CsaV3_1G033640	blue
CsaV3_1G033660	blue
CsaV3_1G033670	blue
CsaV3_1G033820	blue
CsaV3_1G033840	blue
CsaV3_1G033980	blue
CsaV3_1G034200	blue
CsaV3_1G034240	blue
CsaV3_1G034260	blue
CsaV3_1G034290	blue
CsaV3_1G034300	blue
CsaV3_1G034390	blue
CsaV3_1G035710	blue
CsaV3_1G035800	blue
CsaV3_1G035930	blue
CsaV3_1G035940	blue
CsaV3_1G036100	blue
CsaV3_1G036110	blue
CsaV3_1G036180	blue
CsaV3_1G036350	blue
CsaV3_1G036360	blue
CsaV3_1G036430	blue
CsaV3_1G036590	blue
CsaV3_1G036620	blue
CsaV3_1G036870	blue
CsaV3_1G036920	blue
CsaV3_1G037020	blue
CsaV3_1G037060	blue
CsaV3_1G037090	blue
CsaV3_1G037400	blue
CsaV3_1G037610	blue
CsaV3_1G037690	blue
CsaV3_1G038010	blue
CsaV3_1G038030	blue
CsaV3_1G038590	blue
CsaV3_1G038640	blue
CsaV3_1G038650	blue
CsaV3_1G038760	blue
CsaV3_1G038850	blue
CsaV3_1G038980	blue
CsaV3_1G039080	blue
CsaV3_1G039180	blue
CsaV3_1G039380	blue
CsaV3_1G039730	blue
CsaV3_1G039790	blue
CsaV3_1G039810	blue
CsaV3_1G039820	blue
CsaV3_1G039940	blue
CsaV3_1G040150	blue
CsaV3_1G040220	blue
CsaV3_1G040380	blue
CsaV3_1G040470	blue
CsaV3_1G040480	blue
CsaV3_1G040490	blue
CsaV3_1G040530	blue
CsaV3_1G040580	blue
CsaV3_1G040770	blue
CsaV3_1G040850	blue
CsaV3_1G041220	blue
CsaV3_1G041290	blue
CsaV3_1G041490	blue
CsaV3_1G041570	blue
CsaV3_1G041600	blue
CsaV3_1G041690	blue
CsaV3_1G041940	blue
CsaV3_1G042490	blue
CsaV3_1G042640	blue
CsaV3_1G042700	blue
CsaV3_1G042730	blue
CsaV3_1G042740	blue
CsaV3_1G042750	blue
CsaV3_1G042880	blue
CsaV3_1G042950	blue
CsaV3_1G043550	blue
CsaV3_1G043590	blue
CsaV3_1G043600	blue
CsaV3_1G043710	blue
CsaV3_1G043830	blue
CsaV3_1G043960	blue
CsaV3_1G044090	blue
CsaV3_1G044110	blue
CsaV3_1G044370	blue
CsaV3_1G044580	blue
CsaV3_1G044730	blue
CsaV3_1G044940	blue
CsaV3_1G045000	blue
CsaV3_1G045210	blue
CsaV3_1G045220	blue
CsaV3_1G045260	blue
CsaV3_1G045270	blue
CsaV3_1G045280	blue
CsaV3_1G045340	blue
CsaV3_1G045380	blue
CsaV3_1G045390	blue
CsaV3_1G045530	blue
CsaV3_1G045550	blue
CsaV3_1G045560	blue
CsaV3_1G045620	blue
CsaV3_1G045740	blue
CsaV3_1G045870	blue
CsaV3_1G045900	blue
CsaV3_1G045940	blue
CsaV3_1G046160	blue
CsaV3_1G046230	blue
CsaV3_1G046310	blue
CsaV3_1G046320	blue
CsaV3_1G046410	blue
CsaV3_1G046570	blue
CsaV3_1G046650	blue
CsaV3_1G046750	blue
CsaV3_2G001140	blue
CsaV3_2G001300	blue
CsaV3_2G001320	blue
CsaV3_2G001380	blue
CsaV3_2G001440	blue
CsaV3_2G001560	blue
CsaV3_2G001580	blue
CsaV3_2G001600	blue
CsaV3_2G001610	blue
CsaV3_2G001780	blue
CsaV3_2G001850	blue
CsaV3_2G001880	blue
CsaV3_2G001930	blue
CsaV3_2G001980	blue
CsaV3_2G002190	blue
CsaV3_2G002220	blue
CsaV3_2G002280	blue
CsaV3_2G002430	blue
CsaV3_2G002490	blue
CsaV3_2G002570	blue
CsaV3_2G002610	blue
CsaV3_2G002620	blue
CsaV3_2G002700	blue
CsaV3_2G002760	blue
CsaV3_2G003010	blue
CsaV3_2G003070	blue
CsaV3_2G003330	blue
CsaV3_2G003380	blue
CsaV3_2G003390	blue
CsaV3_2G003420	blue
CsaV3_2G003490	blue
CsaV3_2G003510	blue
CsaV3_2G003610	blue
CsaV3_2G003860	blue
CsaV3_2G003870	blue
CsaV3_2G004000	blue
CsaV3_2G004180	blue
CsaV3_2G004230	blue
CsaV3_2G004250	blue
CsaV3_2G004530	blue
CsaV3_2G004580	blue
CsaV3_2G005140	blue
CsaV3_2G005200	blue
CsaV3_2G005320	blue
CsaV3_2G006380	blue
CsaV3_2G006520	blue
CsaV3_2G006620	blue
CsaV3_2G006970	blue
CsaV3_2G007000	blue
CsaV3_2G007110	blue
CsaV3_2G007260	blue
CsaV3_2G007480	blue
CsaV3_2G007510	blue
CsaV3_2G007550	blue
CsaV3_2G007560	blue
CsaV3_2G007610	blue
CsaV3_2G007700	blue
CsaV3_2G007960	blue
CsaV3_2G008090	blue
CsaV3_2G008130	blue
CsaV3_2G008170	blue
CsaV3_2G008370	blue
CsaV3_2G008390	blue
CsaV3_2G008480	blue
CsaV3_2G008520	blue
CsaV3_2G008650	blue
CsaV3_2G009030	blue
CsaV3_2G009160	blue
CsaV3_2G009230	blue
CsaV3_2G009390	blue
CsaV3_2G009520	blue
CsaV3_2G009530	blue
CsaV3_2G009550	blue
CsaV3_2G009570	blue
CsaV3_2G009630	blue
CsaV3_2G009660	blue
CsaV3_2G009920	blue
CsaV3_2G010400	blue
CsaV3_2G010410	blue
CsaV3_2G010570	blue
CsaV3_2G010990	blue
CsaV3_2G011090	blue
CsaV3_2G011160	blue
CsaV3_2G011310	blue
CsaV3_2G011340	blue
CsaV3_2G011510	blue
CsaV3_2G011630	blue
CsaV3_2G011710	blue
CsaV3_2G011850	blue
CsaV3_2G011960	blue
CsaV3_2G012200	blue
CsaV3_2G012320	blue
CsaV3_2G012440	blue
CsaV3_2G012590	blue
CsaV3_2G012600	blue
CsaV3_2G012810	blue
CsaV3_2G012880	blue
CsaV3_2G012890	blue
CsaV3_2G012910	blue
CsaV3_2G012970	blue
CsaV3_2G013020	blue
CsaV3_2G013650	blue
CsaV3_2G013660	blue
CsaV3_2G013890	blue
CsaV3_2G014130	blue
CsaV3_2G014150	blue
CsaV3_2G014180	blue
CsaV3_2G014250	blue
CsaV3_2G014290	blue
CsaV3_2G014400	blue
CsaV3_2G014480	blue
CsaV3_2G014670	blue
CsaV3_2G014720	blue
CsaV3_2G014820	blue
CsaV3_2G014850	blue
CsaV3_2G014860	blue
CsaV3_2G015150	blue
CsaV3_2G015220	blue
CsaV3_2G015230	blue
CsaV3_2G015680	blue
CsaV3_2G015720	blue
CsaV3_2G016080	blue
CsaV3_2G016110	blue
CsaV3_2G016170	blue
CsaV3_2G016220	blue
CsaV3_2G016290	blue
CsaV3_2G016400	blue
CsaV3_2G016480	blue
CsaV3_2G016770	blue
CsaV3_2G017310	blue
CsaV3_2G017570	blue
CsaV3_2G017580	blue
CsaV3_2G017600	blue
CsaV3_2G017700	blue
CsaV3_2G017710	blue
CsaV3_2G017890	blue
CsaV3_2G017900	blue
CsaV3_2G018010	blue
CsaV3_2G018060	blue
CsaV3_2G018100	blue
CsaV3_2G018110	blue
CsaV3_2G019370	blue
CsaV3_2G019450	blue
CsaV3_2G019640	blue
CsaV3_2G019800	blue
CsaV3_2G020850	blue
CsaV3_2G021080	blue
CsaV3_2G021120	blue
CsaV3_2G024260	blue
CsaV3_2G024290	blue
CsaV3_2G024390	blue
CsaV3_2G024480	blue
CsaV3_2G024760	blue
CsaV3_2G024820	blue
CsaV3_2G024830	blue
CsaV3_2G024840	blue
CsaV3_2G024900	blue
CsaV3_2G025000	blue
CsaV3_2G025070	blue
CsaV3_2G025220	blue
CsaV3_2G025730	blue
CsaV3_2G025950	blue
CsaV3_2G026010	blue
CsaV3_2G026310	blue
CsaV3_2G026320	blue
CsaV3_2G026380	blue
CsaV3_2G026660	blue
CsaV3_2G027930	blue
CsaV3_2G027940	blue
CsaV3_2G027980	blue
CsaV3_2G028180	blue
CsaV3_2G028200	blue
CsaV3_2G028410	blue
CsaV3_2G028570	blue
CsaV3_2G028580	blue
CsaV3_2G028610	blue
CsaV3_2G028800	blue
CsaV3_2G028890	blue
CsaV3_2G028910	blue
CsaV3_2G029680	blue
CsaV3_2G029750	blue
CsaV3_2G029780	blue
CsaV3_2G029800	blue
CsaV3_2G030030	blue
CsaV3_2G030140	blue
CsaV3_2G030250	blue
CsaV3_2G030440	blue
CsaV3_2G030510	blue
CsaV3_2G030840	blue
CsaV3_2G031210	blue
CsaV3_2G031300	blue
CsaV3_2G031310	blue
CsaV3_2G031320	blue
CsaV3_2G031470	blue
CsaV3_2G031530	blue
CsaV3_2G031580	blue
CsaV3_2G031590	blue
CsaV3_2G031670	blue
CsaV3_2G031730	blue
CsaV3_2G031820	blue
CsaV3_2G031970	blue
CsaV3_2G031980	blue
CsaV3_2G032000	blue
CsaV3_2G032060	blue
CsaV3_2G032170	blue
CsaV3_2G032200	blue
CsaV3_2G032250	blue
CsaV3_2G032270	blue
CsaV3_2G032330	blue
CsaV3_2G032670	blue
CsaV3_2G032730	blue
CsaV3_2G032750	blue
CsaV3_2G032770	blue
CsaV3_2G032790	blue
CsaV3_2G032960	blue
CsaV3_2G033210	blue
CsaV3_2G033350	blue
CsaV3_2G033370	blue
CsaV3_2G033440	blue
CsaV3_2G033490	blue
CsaV3_2G033660	blue
CsaV3_2G033780	blue
CsaV3_2G033810	blue
CsaV3_2G033820	blue
CsaV3_2G034050	blue
CsaV3_2G034140	blue
CsaV3_2G034260	blue
CsaV3_2G034360	blue
CsaV3_2G034400	blue
CsaV3_2G034550	blue
CsaV3_2G034700	blue
CsaV3_2G034720	blue
CsaV3_2G034800	blue
CsaV3_2G034830	blue
CsaV3_2G035160	blue
CsaV3_2G035270	blue
CsaV3_2G035350	blue
CsaV3_2G035410	blue
CsaV3_2G035450	blue
CsaV3_2G035630	blue
CsaV3_2G035640	blue
CsaV3_2G035870	blue
CsaV3_2G036100	blue
CsaV3_2G036510	blue
CsaV3_2G036620	blue
CsaV3_2G036640	blue
CsaV3_3G000080	blue
CsaV3_3G000130	blue
CsaV3_3G000360	blue
CsaV3_3G000370	blue
CsaV3_3G000380	blue
CsaV3_3G000410	blue
CsaV3_3G000440	blue
CsaV3_3G000470	blue
CsaV3_3G000550	blue
CsaV3_3G000570	blue
CsaV3_3G000700	blue
CsaV3_3G000710	blue
CsaV3_3G000760	blue
CsaV3_3G000810	blue
CsaV3_3G000900	blue
CsaV3_3G001020	blue
CsaV3_3G001050	blue
CsaV3_3G001200	blue
CsaV3_3G001230	blue
CsaV3_3G001340	blue
CsaV3_3G001430	blue
CsaV3_3G001540	blue
CsaV3_3G001840	blue
CsaV3_3G002010	blue
CsaV3_3G002070	blue
CsaV3_3G002240	blue
CsaV3_3G002250	blue
CsaV3_3G002330	blue
CsaV3_3G002490	blue
CsaV3_3G002610	blue
CsaV3_3G002630	blue
CsaV3_3G002780	blue
CsaV3_3G002990	blue
CsaV3_3G003020	blue
CsaV3_3G003070	blue
CsaV3_3G003100	blue
CsaV3_3G003170	blue
CsaV3_3G003250	blue
CsaV3_3G003450	blue
CsaV3_3G003490	blue
CsaV3_3G003520	blue
CsaV3_3G003600	blue
CsaV3_3G003610	blue
CsaV3_3G003730	blue
CsaV3_3G003900	blue
CsaV3_3G003950	blue
CsaV3_3G004050	blue
CsaV3_3G004220	blue
CsaV3_3G004300	blue
CsaV3_3G004350	blue
CsaV3_3G004360	blue
CsaV3_3G004400	blue
CsaV3_3G004500	blue
CsaV3_3G004510	blue
CsaV3_3G004790	blue
CsaV3_3G004810	blue
CsaV3_3G004850	blue
CsaV3_3G004860	blue
CsaV3_3G004910	blue
CsaV3_3G004940	blue
CsaV3_3G005060	blue
CsaV3_3G005100	blue
CsaV3_3G005140	blue
CsaV3_3G005150	blue
CsaV3_3G005190	blue
CsaV3_3G005330	blue
CsaV3_3G005460	blue
CsaV3_3G005530	blue
CsaV3_3G005620	blue
CsaV3_3G005740	blue
CsaV3_3G005830	blue
CsaV3_3G006040	blue
CsaV3_3G006240	blue
CsaV3_3G006250	blue
CsaV3_3G006260	blue
CsaV3_3G006320	blue
CsaV3_3G006330	blue
CsaV3_3G006490	blue
CsaV3_3G006570	blue
CsaV3_3G006580	blue
CsaV3_3G006660	blue
CsaV3_3G006720	blue
CsaV3_3G006810	blue
CsaV3_3G007610	blue
CsaV3_3G007630	blue
CsaV3_3G007860	blue
CsaV3_3G007870	blue
CsaV3_3G007880	blue
CsaV3_3G007890	blue
CsaV3_3G007900	blue
CsaV3_3G008010	blue
CsaV3_3G008040	blue
CsaV3_3G008290	blue
CsaV3_3G008300	blue
CsaV3_3G008310	blue
CsaV3_3G008460	blue
CsaV3_3G008540	blue
CsaV3_3G008620	blue
CsaV3_3G008710	blue
CsaV3_3G008760	blue
CsaV3_3G008850	blue
CsaV3_3G009130	blue
CsaV3_3G009330	blue
CsaV3_3G009580	blue
CsaV3_3G009700	blue
CsaV3_3G009800	blue
CsaV3_3G009840	blue
CsaV3_3G009880	blue
CsaV3_3G010050	blue
CsaV3_3G010090	blue
CsaV3_3G010110	blue
CsaV3_3G010120	blue
CsaV3_3G010150	blue
CsaV3_3G010330	blue
CsaV3_3G010370	blue
CsaV3_3G010380	blue
CsaV3_3G010500	blue
CsaV3_3G010520	blue
CsaV3_3G010550	blue
CsaV3_3G010630	blue
CsaV3_3G010660	blue
CsaV3_3G010870	blue
CsaV3_3G010890	blue
CsaV3_3G010990	blue
CsaV3_3G011020	blue
CsaV3_3G011100	blue
CsaV3_3G011180	blue
CsaV3_3G011370	blue
CsaV3_3G011410	blue
CsaV3_3G011420	blue
CsaV3_3G011480	blue
CsaV3_3G011530	blue
CsaV3_3G011590	blue
CsaV3_3G011730	blue
CsaV3_3G011890	blue
CsaV3_3G011990	blue
CsaV3_3G012070	blue
CsaV3_3G012270	blue
CsaV3_3G012390	blue
CsaV3_3G012530	blue
CsaV3_3G012800	blue
CsaV3_3G012870	blue
CsaV3_3G012890	blue
CsaV3_3G013140	blue
CsaV3_3G013150	blue
CsaV3_3G013160	blue
CsaV3_3G013270	blue
CsaV3_3G013340	blue
CsaV3_3G013560	blue
CsaV3_3G013610	blue
CsaV3_3G013770	blue
CsaV3_3G014000	blue
CsaV3_3G014070	blue
CsaV3_3G014300	blue
CsaV3_3G014350	blue
CsaV3_3G014370	blue
CsaV3_3G014380	blue
CsaV3_3G014410	blue
CsaV3_3G014460	blue
CsaV3_3G014470	blue
CsaV3_3G014490	blue
CsaV3_3G014500	blue
CsaV3_3G014520	blue
CsaV3_3G014540	blue
CsaV3_3G014620	blue
CsaV3_3G015000	blue
CsaV3_3G015190	blue
CsaV3_3G015230	blue
CsaV3_3G015420	blue
CsaV3_3G015460	blue
CsaV3_3G015490	blue
CsaV3_3G015630	blue
CsaV3_3G015730	blue
CsaV3_3G015770	blue
CsaV3_3G015790	blue
CsaV3_3G015800	blue
CsaV3_3G016010	blue
CsaV3_3G016040	blue
CsaV3_3G016120	blue
CsaV3_3G016240	blue
CsaV3_3G016490	blue
CsaV3_3G016810	blue
CsaV3_3G016850	blue
CsaV3_3G016990	blue
CsaV3_3G017020	blue
CsaV3_3G017040	blue
CsaV3_3G017050	blue
CsaV3_3G017060	blue
CsaV3_3G017100	blue
CsaV3_3G017130	blue
CsaV3_3G017380	blue
CsaV3_3G017500	blue
CsaV3_3G017600	blue
CsaV3_3G017860	blue
CsaV3_3G018060	blue
CsaV3_3G018150	blue
CsaV3_3G018210	blue
CsaV3_3G018220	blue
CsaV3_3G018230	blue
CsaV3_3G018310	blue
CsaV3_3G018390	blue
CsaV3_3G018500	blue
CsaV3_3G018510	blue
CsaV3_3G018700	blue
CsaV3_3G018740	blue
CsaV3_3G018780	blue
CsaV3_3G018860	blue
CsaV3_3G019150	blue
CsaV3_3G019160	blue
CsaV3_3G019230	blue
CsaV3_3G019250	blue
CsaV3_3G019300	blue
CsaV3_3G019310	blue
CsaV3_3G019380	blue
CsaV3_3G019620	blue
CsaV3_3G019640	blue
CsaV3_3G019720	blue
CsaV3_3G019860	blue
CsaV3_3G020050	blue
CsaV3_3G020180	blue
CsaV3_3G020250	blue
CsaV3_3G020300	blue
CsaV3_3G020320	blue
CsaV3_3G020330	blue
CsaV3_3G020440	blue
CsaV3_3G020480	blue
CsaV3_3G020820	blue
CsaV3_3G020890	blue
CsaV3_3G021000	blue
CsaV3_3G021220	blue
CsaV3_3G021750	blue
CsaV3_3G021810	blue
CsaV3_3G021850	blue
CsaV3_3G022110	blue
CsaV3_3G022430	blue
CsaV3_3G022490	blue
CsaV3_3G022700	blue
CsaV3_3G022720	blue
CsaV3_3G022780	blue
CsaV3_3G022800	blue
CsaV3_3G022860	blue
CsaV3_3G023040	blue
CsaV3_3G023310	blue
CsaV3_3G023580	blue
CsaV3_3G025020	blue
CsaV3_3G025150	blue
CsaV3_3G026300	blue
CsaV3_3G026330	blue
CsaV3_3G026920	blue
CsaV3_3G027080	blue
CsaV3_3G027210	blue
CsaV3_3G027230	blue
CsaV3_3G027260	blue
CsaV3_3G027290	blue
CsaV3_3G027350	blue
CsaV3_3G027440	blue
CsaV3_3G027510	blue
CsaV3_3G027540	blue
CsaV3_3G027570	blue
CsaV3_3G027640	blue
CsaV3_3G027680	blue
CsaV3_3G027890	blue
CsaV3_3G027940	blue
CsaV3_3G028000	blue
CsaV3_3G028030	blue
CsaV3_3G028050	blue
CsaV3_3G028060	blue
CsaV3_3G028170	blue
CsaV3_3G028350	blue
CsaV3_3G028430	blue
CsaV3_3G028440	blue
CsaV3_3G028520	blue
CsaV3_3G028630	blue
CsaV3_3G028750	blue
CsaV3_3G028790	blue
CsaV3_3G029920	blue
CsaV3_3G029950	blue
CsaV3_3G029990	blue
CsaV3_3G030210	blue
CsaV3_3G030610	blue
CsaV3_3G030640	blue
CsaV3_3G030660	blue
CsaV3_3G030770	blue
CsaV3_3G030920	blue
CsaV3_3G031110	blue
CsaV3_3G031310	blue
CsaV3_3G031590	blue
CsaV3_3G031670	blue
CsaV3_3G031700	blue
CsaV3_3G031740	blue
CsaV3_3G031760	blue
CsaV3_3G031780	blue
CsaV3_3G031860	blue
CsaV3_3G031870	blue
CsaV3_3G031880	blue
CsaV3_3G031890	blue
CsaV3_3G031930	blue
CsaV3_3G032200	blue
CsaV3_3G032380	blue
CsaV3_3G032490	blue
CsaV3_3G032760	blue
CsaV3_3G032900	blue
CsaV3_3G033040	blue
CsaV3_3G033090	blue
CsaV3_3G033290	blue
CsaV3_3G033470	blue
CsaV3_3G033620	blue
CsaV3_3G033680	blue
CsaV3_3G033690	blue
CsaV3_3G033770	blue
CsaV3_3G033790	blue
CsaV3_3G033910	blue
CsaV3_3G034060	blue
CsaV3_3G034130	blue
CsaV3_3G034170	blue
CsaV3_3G034180	blue
CsaV3_3G034190	blue
CsaV3_3G034220	blue
CsaV3_3G034280	blue
CsaV3_3G034290	blue
CsaV3_3G034310	blue
CsaV3_3G034340	blue
CsaV3_3G034360	blue
CsaV3_3G034530	blue
CsaV3_3G034540	blue
CsaV3_3G034570	blue
[truncated: 20,108 more rows]

## Sheet: MEdarkTurquoise (190 DEGS
CsaV3_1G000550
CsaV3_1G006770
CsaV3_1G006780
CsaV3_1G009170
CsaV3_1G010390
CsaV3_1G010690
CsaV3_1G012670
CsaV3_1G014070
CsaV3_1G014710
CsaV3_1G014720
CsaV3_1G015060
CsaV3_1G015860
CsaV3_1G025500
CsaV3_1G027790
CsaV3_1G027800
CsaV3_1G028380
CsaV3_1G028500
CsaV3_1G028990
CsaV3_1G030380
CsaV3_1G031090
CsaV3_1G037470
CsaV3_1G038200
CsaV3_1G039120
CsaV3_1G041020
CsaV3_1G044120
CsaV3_1G045230
CsaV3_1G046150
CsaV3_1G046360
CsaV3_1G046660
CsaV3_2G003450
CsaV3_2G004190
CsaV3_2G005230
CsaV3_2G011860
CsaV3_2G014000
CsaV3_2G014610
CsaV3_2G015970
CsaV3_2G016670
CsaV3_2G017740
CsaV3_2G020870
CsaV3_2G028240
CsaV3_2G028340
CsaV3_2G028450
CsaV3_2G029100
CsaV3_2G030050
CsaV3_2G033200
CsaV3_2G034330
CsaV3_2G035180
CsaV3_2G035760
CsaV3_2G036060
CsaV3_2G036540
CsaV3_3G003290
CsaV3_3G004290
CsaV3_3G005840
CsaV3_3G007530
CsaV3_3G008490
CsaV3_3G011490
CsaV3_3G011520
CsaV3_3G011550
CsaV3_3G011560
CsaV3_3G012150
CsaV3_3G013740
CsaV3_3G020200
CsaV3_3G021410
CsaV3_3G021450
CsaV3_3G023760
CsaV3_3G027160
CsaV3_3G027480
CsaV3_3G031290
CsaV3_3G031540
CsaV3_3G033780
CsaV3_3G034120
CsaV3_3G035470
CsaV3_3G036140
CsaV3_3G036150
CsaV3_3G036260
CsaV3_3G036710
CsaV3_3G037620
CsaV3_3G037640
CsaV3_3G040020
CsaV3_3G040050
CsaV3_3G040220
CsaV3_3G040850
CsaV3_3G041670
CsaV3_3G042320
CsaV3_3G042680
CsaV3_3G045790
CsaV3_3G048570
CsaV3_3G049230
CsaV3_4G000650
CsaV3_4G000900
CsaV3_4G003320
CsaV3_4G003660
CsaV3_4G003990
CsaV3_4G004990
CsaV3_4G005610
CsaV3_4G006190
CsaV3_4G007920
CsaV3_4G008180
CsaV3_4G008650
CsaV3_4G009220
CsaV3_4G013420
CsaV3_4G017690
CsaV3_4G021970
CsaV3_4G023650
CsaV3_4G024260
CsaV3_4G025020
CsaV3_4G025220
CsaV3_4G025590
CsaV3_4G025670
CsaV3_4G025760
CsaV3_4G026450
CsaV3_4G026790
CsaV3_4G031150
CsaV3_5G003200
CsaV3_5G003480
CsaV3_5G004070
CsaV3_5G004740
CsaV3_5G005120
CsaV3_5G012530
CsaV3_5G013200
CsaV3_5G013890
CsaV3_5G015570
CsaV3_5G017030
CsaV3_5G020290
CsaV3_5G023580
CsaV3_5G026590
CsaV3_5G027990
CsaV3_5G028050
CsaV3_5G030400
CsaV3_5G030900
CsaV3_5G032380
CsaV3_5G032620
CsaV3_5G032760
CsaV3_5G035570
CsaV3_6G000790
CsaV3_6G002380
CsaV3_6G003060
CsaV3_6G003610
CsaV3_6G004720
CsaV3_6G009820
CsaV3_6G009880
CsaV3_6G012430
CsaV3_6G012610
CsaV3_6G012860
CsaV3_6G015400
CsaV3_6G015850
CsaV3_6G015870
CsaV3_6G016150
CsaV3_6G031710
CsaV3_6G036760
CsaV3_6G037670
CsaV3_6G043660
CsaV3_6G046040
CsaV3_6G046570
CsaV3_7G002760
CsaV3_7G005520
CsaV3_7G007320
CsaV3_7G008190
CsaV3_7G009960
CsaV3_7G011610
CsaV3_7G019910
CsaV3_7G020960
CsaV3_7G020970
CsaV3_7G021430
CsaV3_7G023990
CsaV3_7G024670
CsaV3_7G024970
CsaV3_7G026470
CsaV3_7G028560
CsaV3_7G032980
CsaV3_UNG024150
CsaV3_UNG033160
CsaV3_UNG042220
CsaV3_UNG045320
CsaV3_UNG070580
CsaV3_UNG086680
CsaV3_UNG086690
CsaV3_UNG088700
CsaV3_UNG103770
CsaV3_UNG139080
CsaV3_UNG150160
CsaV3_UNG159170
CsaV3_UNG163240
CsaV3_UNG185410
CsaV3_UNG187480
CsaV3_UNG210040
CsaV3_UNG210210
CsaV3_UNG210230
CsaV3_UNG230070
CsaV3_UNG240600

## Sheet: MEdakGrey_DEGS181
CsaV3_1G000890
CsaV3_1G002380
CsaV3_1G002490
CsaV3_1G004850
CsaV3_1G005770
CsaV3_1G006140
CsaV3_1G006360
CsaV3_1G009450
CsaV3_1G009830
CsaV3_1G014400
CsaV3_1G014580
CsaV3_1G017300
CsaV3_1G024150
CsaV3_1G024420
CsaV3_1G024430
CsaV3_1G027780
CsaV3_1G027840
CsaV3_1G027970
CsaV3_1G028730
CsaV3_1G029490
CsaV3_1G029590
CsaV3_1G032910
CsaV3_1G033560
CsaV3_1G033830
CsaV3_1G033900
CsaV3_1G034000
CsaV3_1G040500
CsaV3_1G042480
CsaV3_1G043200
CsaV3_1G043740
CsaV3_2G002060
CsaV3_2G002880
CsaV3_2G006370
CsaV3_2G007850
CsaV3_2G008040
CsaV3_2G008150
CsaV3_2G008160
CsaV3_2G009290
CsaV3_2G009300
CsaV3_2G013390
CsaV3_2G014270
CsaV3_2G015550
CsaV3_2G024490
CsaV3_3G000530
CsaV3_3G001640
CsaV3_3G001780
CsaV3_3G002060
CsaV3_3G002840
CsaV3_3G004710
CsaV3_3G010580
CsaV3_3G014250
CsaV3_3G016620
CsaV3_3G017650
CsaV3_3G020010
CsaV3_3G020760
CsaV3_3G020780
CsaV3_3G020790
CsaV3_3G021660
CsaV3_3G026490
CsaV3_3G027050
CsaV3_3G027110
CsaV3_3G028510
CsaV3_3G028660
CsaV3_3G030360
CsaV3_3G032950
CsaV3_3G041890
CsaV3_3G043070
CsaV3_3G043880
CsaV3_3G044750
CsaV3_3G044880
CsaV3_3G045270
CsaV3_3G045550
CsaV3_3G045730
CsaV3_3G048140
CsaV3_3G048710
CsaV3_3G049160
CsaV3_3G049600
CsaV3_4G000010
CsaV3_4G001500
CsaV3_4G001640
CsaV3_4G001670
CsaV3_4G005620
CsaV3_4G008140
CsaV3_4G008730
CsaV3_4G009700
CsaV3_4G024370
CsaV3_4G025680
CsaV3_4G029020
CsaV3_4G029100
CsaV3_4G029520
CsaV3_4G029600
CsaV3_4G036240
CsaV3_5G000880
CsaV3_5G001190
CsaV3_5G001680
CsaV3_5G002300
CsaV3_5G005320
CsaV3_5G005490
CsaV3_5G006030
CsaV3_5G010480
CsaV3_5G012520
CsaV3_5G013550
CsaV3_5G014040
CsaV3_5G014600
CsaV3_5G014660
CsaV3_5G015160
CsaV3_5G015400
CsaV3_5G015410
CsaV3_5G015840
CsaV3_5G020410
CsaV3_5G021900
CsaV3_5G023570
CsaV3_5G023960
CsaV3_5G024460
CsaV3_5G025050
CsaV3_5G025310
CsaV3_5G025680
CsaV3_5G026830
CsaV3_5G029890
CsaV3_5G030850
CsaV3_5G035470
CsaV3_5G036400
CsaV3_5G036680
CsaV3_5G037540
CsaV3_6G000610
CsaV3_6G000730
CsaV3_6G003230
CsaV3_6G003680
CsaV3_6G003950
CsaV3_6G009490
CsaV3_6G009860
CsaV3_6G010010
CsaV3_6G012310
CsaV3_6G012440
CsaV3_6G015700
CsaV3_6G016040
CsaV3_6G016500
CsaV3_6G017420
CsaV3_6G024100
CsaV3_6G024110
CsaV3_6G026310
CsaV3_6G029630
CsaV3_6G033680
CsaV3_6G036630
CsaV3_6G039820
CsaV3_6G040070
CsaV3_6G046490
CsaV3_6G046500
CsaV3_6G046510
CsaV3_6G049710
CsaV3_6G050720
CsaV3_6G052030
CsaV3_6G053110
CsaV3_7G001810
CsaV3_7G002920
CsaV3_7G003200
CsaV3_7G018800
CsaV3_7G021400
CsaV3_7G021680
CsaV3_7G023310
CsaV3_7G025520
CsaV3_7G025630
CsaV3_7G025640
CsaV3_7G026260
CsaV3_7G026940
CsaV3_7G028760
CsaV3_7G031690
CsaV3_7G031940
CsaV3_UNG004060
CsaV3_UNG031160
CsaV3_UNG034160
CsaV3_UNG053460
CsaV3_UNG094710
CsaV3_UNG102750
CsaV3_UNG168300
CsaV3_UNG189490
CsaV3_UNG208380
CsaV3_UNG209970
CsaV3_UNG223600
CsaV3_UNG229030
CsaV3_UNG235410

## Sheet: MERoyal Blue DEGs 259
CsaV3_1G000440
CsaV3_1G001220
CsaV3_1G001430
CsaV3_1G001990
CsaV3_1G003620
CsaV3_1G005210
CsaV3_1G006790
CsaV3_1G009750
CsaV3_1G009840
CsaV3_1G011170
CsaV3_1G012870
CsaV3_1G013460
CsaV3_1G013500
CsaV3_1G013620
CsaV3_1G013940
CsaV3_1G014180
CsaV3_1G014390
CsaV3_1G017350
CsaV3_1G019600
CsaV3_1G028700
CsaV3_1G029470
CsaV3_1G031160
CsaV3_1G031960
CsaV3_1G032340
CsaV3_1G032890
CsaV3_1G034100
CsaV3_1G039000
CsaV3_1G039330
CsaV3_1G040050
CsaV3_1G040310
CsaV3_1G042560
CsaV3_1G043380
CsaV3_1G044970
CsaV3_1G045370
CsaV3_1G045610
CsaV3_1G045630
CsaV3_2G001220
CsaV3_2G001660
CsaV3_2G004040
CsaV3_2G004780
CsaV3_2G004790
CsaV3_2G004880
CsaV3_2G004970
CsaV3_2G005060
CsaV3_2G006810
CsaV3_2G006830
CsaV3_2G007570
CsaV3_2G010580
CsaV3_2G010840
CsaV3_2G012230
CsaV3_2G012680
CsaV3_2G012790
CsaV3_2G013700
CsaV3_2G015920
CsaV3_2G016040
CsaV3_2G016260
CsaV3_2G017100
CsaV3_2G024450
CsaV3_2G024800
CsaV3_2G025330
CsaV3_2G026190
CsaV3_2G026230
CsaV3_2G026670
CsaV3_2G027780
CsaV3_2G028160
CsaV3_2G032010
CsaV3_2G033020
CsaV3_2G034520
CsaV3_2G036050
CsaV3_3G000240
CsaV3_3G000450
CsaV3_3G001460
CsaV3_3G003780
CsaV3_3G004900
CsaV3_3G005680
CsaV3_3G008250
CsaV3_3G008630
CsaV3_3G008810
CsaV3_3G010420
CsaV3_3G012860
CsaV3_3G014850
CsaV3_3G015310
CsaV3_3G017900
CsaV3_3G019040
CsaV3_3G019870
CsaV3_3G021190
CsaV3_3G021330
CsaV3_3G022340
CsaV3_3G028400
CsaV3_3G029850
CsaV3_3G035120
CsaV3_3G036970
CsaV3_3G037180
CsaV3_3G037530
CsaV3_3G038270
CsaV3_3G038580
CsaV3_3G038930
CsaV3_3G038960
CsaV3_3G039570
CsaV3_3G041010
CsaV3_3G042440
CsaV3_3G042690
CsaV3_3G043190
CsaV3_3G044040
CsaV3_3G044500
CsaV3_3G045570
CsaV3_3G046190
CsaV3_3G047460
CsaV3_3G049070
CsaV3_3G049480
CsaV3_3G049550
CsaV3_4G000180
CsaV3_4G000270
CsaV3_4G000890
CsaV3_4G001200
CsaV3_4G003210
CsaV3_4G003890
CsaV3_4G004710
CsaV3_4G008720
CsaV3_4G009580
CsaV3_4G020810
CsaV3_4G023170
CsaV3_4G025200
CsaV3_4G025270
CsaV3_4G025370
CsaV3_4G027000
CsaV3_4G027650
CsaV3_4G028460
CsaV3_4G028480
CsaV3_4G029680
CsaV3_4G031460
CsaV3_4G031570
CsaV3_4G032870
CsaV3_4G033480
CsaV3_4G033600
CsaV3_4G034450
CsaV3_4G034950
CsaV3_4G034960
CsaV3_4G035380
CsaV3_5G000010
CsaV3_5G002170
CsaV3_5G002430
CsaV3_5G002440
CsaV3_5G002460
CsaV3_5G005330
CsaV3_5G005600
CsaV3_5G008780
CsaV3_5G008850
CsaV3_5G012320
CsaV3_5G014830
CsaV3_5G015910
CsaV3_5G016960
CsaV3_5G017010
CsaV3_5G017110
CsaV3_5G018630
CsaV3_5G023320
CsaV3_5G023740
CsaV3_5G024030
CsaV3_5G024050
CsaV3_5G025380
CsaV3_5G026130
CsaV3_5G027460
CsaV3_5G027730
CsaV3_5G028380
CsaV3_5G028480
CsaV3_5G031470
CsaV3_5G031480
CsaV3_5G032070
CsaV3_5G032580
CsaV3_5G033940
CsaV3_5G034220
CsaV3_5G034640
CsaV3_5G034850
CsaV3_5G037170
CsaV3_5G037210
CsaV3_6G000050
CsaV3_6G000390
CsaV3_6G006120
CsaV3_6G006660
CsaV3_6G006670
CsaV3_6G006890
CsaV3_6G009070
CsaV3_6G010030
CsaV3_6G014990
CsaV3_6G015140
CsaV3_6G016610
CsaV3_6G016650
CsaV3_6G016870
CsaV3_6G017180
CsaV3_6G018420
CsaV3_6G018790
CsaV3_6G018940
CsaV3_6G021500
CsaV3_6G021910
CsaV3_6G025220
CsaV3_6G031520
CsaV3_6G032000
CsaV3_6G032510
CsaV3_6G032530
CsaV3_6G036850
CsaV3_6G036930
CsaV3_6G041300
CsaV3_6G041400
CsaV3_6G041450
CsaV3_6G045020
CsaV3_6G046460
CsaV3_6G046470
CsaV3_6G048330
CsaV3_6G049170
CsaV3_6G049620
CsaV3_6G050260
CsaV3_6G052460
CsaV3_6G053000
CsaV3_7G000450
CsaV3_7G002090
CsaV3_7G005940
CsaV3_7G005960
CsaV3_7G006700
CsaV3_7G007590
CsaV3_7G010000
CsaV3_7G011300
CsaV3_7G011370
CsaV3_7G011450
CsaV3_7G012650
CsaV3_7G014970
CsaV3_7G015030
CsaV3_7G019860
CsaV3_7G021390
CsaV3_7G021770
CsaV3_7G023340
CsaV3_7G023450
CsaV3_7G023710
CsaV3_7G023910
CsaV3_7G026270
CsaV3_7G026280
CsaV3_7G029800
CsaV3_7G030090
CsaV3_7G030630
CsaV3_7G033240
CsaV3_7G033520
CsaV3_7G034760
CsaV3_UNG007090
CsaV3_UNG028150
CsaV3_UNG063480
CsaV3_UNG075600
CsaV3_UNG125970
CsaV3_UNG144100
CsaV3_UNG160210
CsaV3_UNG163230
CsaV3_UNG167270
CsaV3_UNG167290
CsaV3_UNG202600
CsaV3_UNG207930
CsaV3_UNG208500
CsaV3_UNG209560
CsaV3_UNG209840
CsaV3_UNG209960
CsaV3_UNG210020
CsaV3_UNG220500

## Sheet: MEblack-DEGs1141
CsaV3_1G000030
CsaV3_1G000150
CsaV3_1G000160
CsaV3_1G000270
CsaV3_1G000720
CsaV3_1G000730
CsaV3_1G000950
CsaV3_1G000970
CsaV3_1G000980
CsaV3_1G001080
CsaV3_1G001090
CsaV3_1G001640
CsaV3_1G001800
CsaV3_1G001910
CsaV3_1G002040
CsaV3_1G002050
CsaV3_1G002470
CsaV3_1G002510
CsaV3_1G002580
CsaV3_1G002600
CsaV3_1G003370
CsaV3_1G003480
CsaV3_1G003590
CsaV3_1G003710
CsaV3_1G003820
CsaV3_1G003910
CsaV3_1G004090
CsaV3_1G004300
CsaV3_1G004620
CsaV3_1G004680
CsaV3_1G004840
CsaV3_1G005190
CsaV3_1G005290
CsaV3_1G005610
CsaV3_1G005750
CsaV3_1G006060
CsaV3_1G006490
CsaV3_1G006660
CsaV3_1G006740
CsaV3_1G006750
CsaV3_1G007240
CsaV3_1G007540
CsaV3_1G007660
CsaV3_1G007830
CsaV3_1G007880
CsaV3_1G008340
CsaV3_1G008580
CsaV3_1G008870
CsaV3_1G009100
CsaV3_1G009120
CsaV3_1G009370
CsaV3_1G009380
CsaV3_1G009390
CsaV3_1G009400
CsaV3_1G009510
CsaV3_1G009520
CsaV3_1G009760
CsaV3_1G009910
CsaV3_1G010140
CsaV3_1G010220
CsaV3_1G010310
CsaV3_1G010320
CsaV3_1G010350
CsaV3_1G010410
CsaV3_1G010440
CsaV3_1G010460
CsaV3_1G010470
CsaV3_1G010860
CsaV3_1G011280
CsaV3_1G011350
CsaV3_1G011400
CsaV3_1G011460
CsaV3_1G011530
CsaV3_1G011610
CsaV3_1G011850
CsaV3_1G012070
CsaV3_1G012110
CsaV3_1G012900
CsaV3_1G013090
CsaV3_1G013100
CsaV3_1G013110
CsaV3_1G013410
CsaV3_1G013570
CsaV3_1G013860
CsaV3_1G013950
CsaV3_1G014550
CsaV3_1G014560
CsaV3_1G015300
CsaV3_1G015370
CsaV3_1G016940
CsaV3_1G016970
CsaV3_1G017190
CsaV3_1G020740
CsaV3_1G020760
CsaV3_1G020780
CsaV3_1G022870
CsaV3_1G024200
CsaV3_1G024260
CsaV3_1G024270
CsaV3_1G024330
CsaV3_1G024350
CsaV3_1G024360
CsaV3_1G024370
CsaV3_1G026600
CsaV3_1G027990
CsaV3_1G028060
CsaV3_1G028520
CsaV3_1G028670
CsaV3_1G028910
CsaV3_1G029230
CsaV3_1G029260
CsaV3_1G029310
CsaV3_1G029840
CsaV3_1G029880
CsaV3_1G030130
CsaV3_1G030320
CsaV3_1G030570
CsaV3_1G031040
CsaV3_1G031170
CsaV3_1G031220
CsaV3_1G031230
CsaV3_1G031280
CsaV3_1G031700
CsaV3_1G032040
CsaV3_1G032110
CsaV3_1G032230
CsaV3_1G032430
CsaV3_1G032860
CsaV3_1G033260
CsaV3_1G033490
CsaV3_1G033500
CsaV3_1G033600
CsaV3_1G033690
CsaV3_1G033700
CsaV3_1G034630
CsaV3_1G035720
CsaV3_1G035740
CsaV3_1G036130
CsaV3_1G036270
CsaV3_1G036340
CsaV3_1G036480
CsaV3_1G036660
CsaV3_1G036680
CsaV3_1G037070
CsaV3_1G037390
CsaV3_1G037510
CsaV3_1G037680
CsaV3_1G037710
CsaV3_1G038080
CsaV3_1G038180
CsaV3_1G038190
CsaV3_1G038350
CsaV3_1G038400
CsaV3_1G038420
CsaV3_1G038470
CsaV3_1G038540
CsaV3_1G039100
CsaV3_1G039520
CsaV3_1G039540
CsaV3_1G039550
CsaV3_1G039720
CsaV3_1G039800
CsaV3_1G039850
CsaV3_1G040000
CsaV3_1G040200
CsaV3_1G040400
CsaV3_1G040550
CsaV3_1G041010
CsaV3_1G041150
CsaV3_1G041370
CsaV3_1G041510
CsaV3_1G042080
CsaV3_1G042410
CsaV3_1G043570
CsaV3_1G043640
CsaV3_1G044640
CsaV3_1G044860
CsaV3_1G045060
CsaV3_1G045100
CsaV3_1G045320
CsaV3_1G046000
CsaV3_1G046060
CsaV3_1G046440
CsaV3_1G046510
CsaV3_1G046620
CsaV3_2G001210
CsaV3_2G001820
CsaV3_2G001890
CsaV3_2G002030
CsaV3_2G002070
CsaV3_2G002090
CsaV3_2G002410
CsaV3_2G003140
CsaV3_2G003160
CsaV3_2G003280
CsaV3_2G003370
CsaV3_2G004160
CsaV3_2G004770
CsaV3_2G004800
CsaV3_2G004830
CsaV3_2G004950
CsaV3_2G005000
CsaV3_2G005010
CsaV3_2G005290
CsaV3_2G005350
CsaV3_2G005360
CsaV3_2G006420
CsaV3_2G006790
CsaV3_2G007090
CsaV3_2G007440
CsaV3_2G008080
CsaV3_2G008180
CsaV3_2G008330
CsaV3_2G008640
CsaV3_2G008670
CsaV3_2G008700
CsaV3_2G008710
CsaV3_2G009140
CsaV3_2G009540
CsaV3_2G009560
CsaV3_2G009750
CsaV3_2G010060
CsaV3_2G010100
CsaV3_2G010760
CsaV3_2G010860
CsaV3_2G011000
CsaV3_2G011240
CsaV3_2G011430
CsaV3_2G011450
CsaV3_2G012490
CsaV3_2G012820
CsaV3_2G012980
CsaV3_2G013210
CsaV3_2G013570
CsaV3_2G013690
CsaV3_2G014140
CsaV3_2G014410
CsaV3_2G014630
CsaV3_2G014640
CsaV3_2G014890
CsaV3_2G014900
CsaV3_2G015390
CsaV3_2G015410
CsaV3_2G015450
CsaV3_2G015520
CsaV3_2G015530
CsaV3_2G015820
CsaV3_2G016300
CsaV3_2G016310
CsaV3_2G016810
CsaV3_2G016990
CsaV3_2G017000
CsaV3_2G017070
CsaV3_2G017320
CsaV3_2G017450
CsaV3_2G017560
CsaV3_2G017630
CsaV3_2G017660
CsaV3_2G017870
CsaV3_2G018070
CsaV3_2G018150
CsaV3_2G018240
CsaV3_2G019460
CsaV3_2G020840
CsaV3_2G021090
CsaV3_2G022180
CsaV3_2G024350
CsaV3_2G024930
CsaV3_2G024940
CsaV3_2G024970
CsaV3_2G024980
CsaV3_2G025390
CsaV3_2G025550
CsaV3_2G025690
CsaV3_2G025780
CsaV3_2G025790
CsaV3_2G025800
CsaV3_2G026100
CsaV3_2G026540
CsaV3_2G026630
CsaV3_2G027820
CsaV3_2G028090
CsaV3_2G028100
CsaV3_2G028230
CsaV3_2G028790
CsaV3_2G028840
CsaV3_2G029010
CsaV3_2G029230
CsaV3_2G029410
CsaV3_2G029470
CsaV3_2G029530
CsaV3_2G029570
CsaV3_2G029990
CsaV3_2G030270
CsaV3_2G030320
CsaV3_2G030660
CsaV3_2G030770
CsaV3_2G030910
CsaV3_2G030940
CsaV3_2G031340
CsaV3_2G031400
CsaV3_2G031720
CsaV3_2G031780
CsaV3_2G032070
CsaV3_2G032130
CsaV3_2G032150
CsaV3_2G032390
CsaV3_2G032490
CsaV3_2G033060
CsaV3_2G033450
CsaV3_2G033710
CsaV3_2G033930
CsaV3_2G034030
CsaV3_2G034070
CsaV3_2G034090
CsaV3_2G034100
CsaV3_2G034410
CsaV3_2G034560
CsaV3_2G034570
CsaV3_2G034660
CsaV3_2G034970
CsaV3_2G035010
CsaV3_2G035020
CsaV3_2G035110
CsaV3_2G035120
CsaV3_2G035500
CsaV3_2G036080
CsaV3_2G036310
CsaV3_2G036350
CsaV3_2G036410
CsaV3_2G036440
CsaV3_2G036560
CsaV3_3G000020
CsaV3_3G000040
CsaV3_3G000160
CsaV3_3G000190
CsaV3_3G000480
CsaV3_3G000560
CsaV3_3G000870
CsaV3_3G000880
CsaV3_3G000970
CsaV3_3G001330
CsaV3_3G001760
CsaV3_3G001980
CsaV3_3G002230
CsaV3_3G003200
CsaV3_3G003340
CsaV3_3G003590
CsaV3_3G003660
CsaV3_3G003870
CsaV3_3G004100
CsaV3_3G004480
CsaV3_3G004620
CsaV3_3G004840
CsaV3_3G004980
CsaV3_3G005080
CsaV3_3G005290
CsaV3_3G005590
CsaV3_3G005860
CsaV3_3G006130
CsaV3_3G006480
CsaV3_3G006880
CsaV3_3G007010
CsaV3_3G007520
CsaV3_3G007970
CsaV3_3G008480
CsaV3_3G008720
CsaV3_3G008730
CsaV3_3G009180
CsaV3_3G009250
CsaV3_3G009480
CsaV3_3G009720
CsaV3_3G009850
CsaV3_3G009870
CsaV3_3G010180
CsaV3_3G011010
CsaV3_3G011470
CsaV3_3G011780
CsaV3_3G011840
CsaV3_3G012510
CsaV3_3G012580
CsaV3_3G012810
CsaV3_3G013290
CsaV3_3G013440
CsaV3_3G013450
CsaV3_3G013830
CsaV3_3G013980
CsaV3_3G014160
CsaV3_3G015320
CsaV3_3G015640
CsaV3_3G015650
CsaV3_3G015950
CsaV3_3G016220
CsaV3_3G016310
CsaV3_3G017680
CsaV3_3G018050
CsaV3_3G018200
CsaV3_3G018620
CsaV3_3G019660
CsaV3_3G019920
CsaV3_3G020120
CsaV3_3G020310
CsaV3_3G020920
CsaV3_3G020940
CsaV3_3G021150
CsaV3_3G021350
CsaV3_3G021380
CsaV3_3G021900
CsaV3_3G021920
CsaV3_3G022000
CsaV3_3G022150
CsaV3_3G022230
CsaV3_3G022850
CsaV3_3G023430
CsaV3_3G023510
CsaV3_3G023550
CsaV3_3G023560
CsaV3_3G023600
CsaV3_3G024990
CsaV3_3G026350
CsaV3_3G026410
CsaV3_3G026610
CsaV3_3G026730
CsaV3_3G027500
CsaV3_3G027760
CsaV3_3G027850
CsaV3_3G027870
CsaV3_3G030080
CsaV3_3G031490
CsaV3_3G032100
CsaV3_3G032480
CsaV3_3G032580
CsaV3_3G032590
CsaV3_3G032720
CsaV3_3G032730
CsaV3_3G032920
CsaV3_3G033060
CsaV3_3G033390
CsaV3_3G034000
CsaV3_3G034020
CsaV3_3G034460
CsaV3_3G034590
CsaV3_3G034800
CsaV3_3G035100
CsaV3_3G035190
CsaV3_3G035330
CsaV3_3G035380
CsaV3_3G035690
CsaV3_3G035720
CsaV3_3G035740
CsaV3_3G035790
CsaV3_3G036020
CsaV3_3G036040
CsaV3_3G036270
CsaV3_3G036310
CsaV3_3G036630
CsaV3_3G036850
CsaV3_3G036900
CsaV3_3G037630
CsaV3_3G037740
CsaV3_3G037930
CsaV3_3G038180
CsaV3_3G038240
CsaV3_3G038510
CsaV3_3G039160
CsaV3_3G039870
CsaV3_3G039900
CsaV3_3G040040
CsaV3_3G040180
CsaV3_3G040280
CsaV3_3G040310
CsaV3_3G040570
CsaV3_3G040580
CsaV3_3G040640
CsaV3_3G040810
CsaV3_3G041280
CsaV3_3G041340
CsaV3_3G041360
CsaV3_3G041400
CsaV3_3G041510
CsaV3_3G042160
CsaV3_3G042520
CsaV3_3G043180
CsaV3_3G043210
CsaV3_3G043670
CsaV3_3G043700
CsaV3_3G043890
CsaV3_3G043920
CsaV3_3G043940
CsaV3_3G043950
CsaV3_3G044010
CsaV3_3G044440
CsaV3_3G044540
CsaV3_3G044670
CsaV3_3G044700
CsaV3_3G044740
CsaV3_3G044850
CsaV3_3G044910
CsaV3_3G044920
CsaV3_3G045250
CsaV3_3G045290
CsaV3_3G045300
CsaV3_3G045320
CsaV3_3G045970
CsaV3_3G046090
CsaV3_3G046350
CsaV3_3G046370
CsaV3_3G046530
CsaV3_3G047150
CsaV3_3G047400
CsaV3_3G047440
CsaV3_3G047790
CsaV3_3G047950
CsaV3_3G049430
CsaV3_3G049530
CsaV3_3G049910
CsaV3_3G050110
CsaV3_4G000110
CsaV3_4G000290
CsaV3_4G000300
CsaV3_4G000310
CsaV3_4G000350
CsaV3_4G000440
CsaV3_4G000850
CsaV3_4G000920
CsaV3_4G001120
CsaV3_4G001190
CsaV3_4G001420
CsaV3_4G001550
CsaV3_4G002080
CsaV3_4G003030
CsaV3_4G003070
CsaV3_4G003080
CsaV3_4G003170
CsaV3_4G003260
CsaV3_4G003350
CsaV3_4G003490
CsaV3_4G003880
CsaV3_4G003960
CsaV3_4G003970
CsaV3_4G004100
CsaV3_4G004380
CsaV3_4G004750
CsaV3_4G004770
CsaV3_4G004890
CsaV3_4G004910
CsaV3_4G005240
CsaV3_4G005260
CsaV3_4G005480
CsaV3_4G005680
CsaV3_4G005980
CsaV3_4G006280
CsaV3_4G006840
CsaV3_4G006940
CsaV3_4G007090
CsaV3_4G007290
CsaV3_4G007660
CsaV3_4G007680
CsaV3_4G007810
CsaV3_4G007930
CsaV3_4G007990
CsaV3_4G008480
CsaV3_4G009060
CsaV3_4G009160
CsaV3_4G009640
CsaV3_4G009650
CsaV3_4G009980
CsaV3_4G010190
CsaV3_4G010220
CsaV3_4G010230
CsaV3_4G010350
CsaV3_4G010460
CsaV3_4G011850
CsaV3_4G014780
CsaV3_4G017510
CsaV3_4G021930
CsaV3_4G023470
CsaV3_4G023730
CsaV3_4G023880
CsaV3_4G023910
CsaV3_4G023950
CsaV3_4G023960
CsaV3_4G023970
CsaV3_4G024600
CsaV3_4G024790
CsaV3_4G024920
CsaV3_4G025090
CsaV3_4G025240
CsaV3_4G025390
CsaV3_4G025460
CsaV3_4G025470
CsaV3_4G025530
CsaV3_4G026300
CsaV3_4G026330
CsaV3_4G026410
CsaV3_4G026670
CsaV3_4G027810
CsaV3_4G027860
CsaV3_4G028180
CsaV3_4G028650
CsaV3_4G028700
CsaV3_4G028830
CsaV3_4G028850
CsaV3_4G028900
CsaV3_4G028990
CsaV3_4G029130
CsaV3_4G029180
CsaV3_4G029190
CsaV3_4G029220
CsaV3_4G029320
CsaV3_4G029330
CsaV3_4G029440
CsaV3_4G029540
CsaV3_4G029880
CsaV3_4G030130
CsaV3_4G030140
CsaV3_4G030340
CsaV3_4G030350
CsaV3_4G030360
CsaV3_4G030460
CsaV3_4G030550
CsaV3_4G030560
CsaV3_4G030690
CsaV3_4G031240
CsaV3_4G031990
CsaV3_4G032020
CsaV3_4G032280
CsaV3_4G032380
CsaV3_4G032810
CsaV3_4G032960
CsaV3_4G033040
CsaV3_4G033160
CsaV3_4G033560
CsaV3_4G033850
CsaV3_4G034320
CsaV3_4G034420
CsaV3_4G034440
CsaV3_4G034560
CsaV3_4G034650
CsaV3_4G035160
CsaV3_4G035880
CsaV3_4G036100
CsaV3_4G036170
CsaV3_4G036350
CsaV3_4G036590
CsaV3_4G036760
CsaV3_4G036880
CsaV3_4G037260
CsaV3_4G037490
CsaV3_4G037590
CsaV3_4G038020
CsaV3_5G000220
CsaV3_5G000330
CsaV3_5G000810
CsaV3_5G001620
CsaV3_5G001880
CsaV3_5G001890
CsaV3_5G002040
CsaV3_5G003490
CsaV3_5G003550
CsaV3_5G003560
CsaV3_5G003570
CsaV3_5G003590
CsaV3_5G003620
CsaV3_5G003930
CsaV3_5G004120
CsaV3_5G004130
CsaV3_5G004250
CsaV3_5G004580
CsaV3_5G004760
CsaV3_5G004830
CsaV3_5G004860
CsaV3_5G004890
CsaV3_5G005160
CsaV3_5G005210
CsaV3_5G005220
CsaV3_5G005230
CsaV3_5G005240
CsaV3_5G005800
CsaV3_5G005810
CsaV3_5G005840
CsaV3_5G005910
CsaV3_5G005930
CsaV3_5G006040
CsaV3_5G006250
CsaV3_5G006290
CsaV3_5G006350
CsaV3_5G006620
CsaV3_5G008280
CsaV3_5G008320
CsaV3_5G008410
CsaV3_5G008870
CsaV3_5G008940
CsaV3_5G010150
CsaV3_5G010810
CsaV3_5G011160
CsaV3_5G011220
CsaV3_5G012310
CsaV3_5G012630
CsaV3_5G012930
CsaV3_5G013360
CsaV3_5G013390
CsaV3_5G013610
CsaV3_5G013880
CsaV3_5G014030
CsaV3_5G014370
CsaV3_5G014560
CsaV3_5G014570
CsaV3_5G014580
CsaV3_5G014630
CsaV3_5G014750
CsaV3_5G014940
CsaV3_5G015750
CsaV3_5G015880
CsaV3_5G015940
CsaV3_5G015950
CsaV3_5G017160
CsaV3_5G017490
CsaV3_5G020250
CsaV3_5G020270
CsaV3_5G020280
CsaV3_5G020300
CsaV3_5G023130
CsaV3_5G023160
CsaV3_5G023230
CsaV3_5G023700
CsaV3_5G023840
CsaV3_5G023950
CsaV3_5G024690
CsaV3_5G025120
CsaV3_5G025300
CsaV3_5G025410
CsaV3_5G025430
CsaV3_5G025590
CsaV3_5G025830
CsaV3_5G026240
CsaV3_5G026540
CsaV3_5G026550
CsaV3_5G026650
CsaV3_5G027160
CsaV3_5G027270
CsaV3_5G028090
CsaV3_5G028130
CsaV3_5G028140
CsaV3_5G028510
CsaV3_5G028910
CsaV3_5G029050
CsaV3_5G029250
CsaV3_5G029290
CsaV3_5G029370
CsaV3_5G029730
CsaV3_5G029780
CsaV3_5G030330
CsaV3_5G030380
CsaV3_5G030740
CsaV3_5G030780
CsaV3_5G030820
CsaV3_5G031600
CsaV3_5G031700
CsaV3_5G031740
CsaV3_5G031760
CsaV3_5G032360
CsaV3_5G032390
CsaV3_5G032400
CsaV3_5G032540
CsaV3_5G032680
CsaV3_5G032720
CsaV3_5G032730
CsaV3_5G032900
CsaV3_5G032910
CsaV3_5G032930
CsaV3_5G033270
CsaV3_5G033350
CsaV3_5G033390
CsaV3_5G033640
CsaV3_5G033660
CsaV3_5G033840
CsaV3_5G034020
CsaV3_5G034100
CsaV3_5G034110
CsaV3_5G034140
CsaV3_5G034200
CsaV3_5G034400
CsaV3_5G034700
CsaV3_5G034710
CsaV3_5G034960
CsaV3_5G035120
CsaV3_5G035340
CsaV3_5G035350
CsaV3_5G035400
CsaV3_5G035880
CsaV3_5G035920
CsaV3_5G035930
CsaV3_5G036080
CsaV3_5G036210
CsaV3_5G036460
CsaV3_5G036640
CsaV3_5G036720
CsaV3_5G036740
CsaV3_5G036860
CsaV3_5G037050
CsaV3_5G037560
CsaV3_5G037700
CsaV3_5G037720
CsaV3_5G037850
CsaV3_5G038110
CsaV3_5G038170
CsaV3_5G038380
CsaV3_5G038760
CsaV3_5G038920
CsaV3_5G039110
CsaV3_5G039480
CsaV3_5G039830
CsaV3_5G040240
CsaV3_5G040310
CsaV3_5G040410
CsaV3_6G000250
CsaV3_6G000440
CsaV3_6G000810
CsaV3_6G001620
CsaV3_6G001940
CsaV3_6G002230
CsaV3_6G003110
CsaV3_6G003140
CsaV3_6G003240
CsaV3_6G003410
CsaV3_6G003700
CsaV3_6G004020
CsaV3_6G004460
CsaV3_6G005630
CsaV3_6G005730
CsaV3_6G005740
CsaV3_6G006010
CsaV3_6G006020
CsaV3_6G006130
CsaV3_6G006140
CsaV3_6G006430
CsaV3_6G006790
CsaV3_6G006940
CsaV3_6G006950
CsaV3_6G006960
CsaV3_6G006980
CsaV3_6G006990
CsaV3_6G007920
CsaV3_6G007950
CsaV3_6G008070
CsaV3_6G008080
CsaV3_6G008150
CsaV3_6G008190
CsaV3_6G008270
CsaV3_6G008940
CsaV3_6G009000
CsaV3_6G009080
CsaV3_6G009430
CsaV3_6G009850
CsaV3_6G009990
CsaV3_6G010130
CsaV3_6G012600
CsaV3_6G012660
CsaV3_6G012880
CsaV3_6G013340
CsaV3_6G013600
CsaV3_6G013820
CsaV3_6G013840
CsaV3_6G013870
CsaV3_6G013950
CsaV3_6G014000
CsaV3_6G014110
CsaV3_6G014350
CsaV3_6G014920
CsaV3_6G014930
CsaV3_6G015040
CsaV3_6G015080
CsaV3_6G015090
CsaV3_6G015390
CsaV3_6G015950
CsaV3_6G016000
CsaV3_6G016220
CsaV3_6G016250
CsaV3_6G016260
CsaV3_6G016360
CsaV3_6G016440
CsaV3_6G016800
CsaV3_6G017100
CsaV3_6G017310
CsaV3_6G017370
CsaV3_6G017410
CsaV3_6G018620
CsaV3_6G018640
CsaV3_6G018650
CsaV3_6G018900
CsaV3_6G021220
CsaV3_6G021710
CsaV3_6G022010
CsaV3_6G022480
CsaV3_6G022500
CsaV3_6G022560
CsaV3_6G022570
CsaV3_6G022730
CsaV3_6G025280
CsaV3_6G028530
CsaV3_6G031150
CsaV3_6G031690
CsaV3_6G031910
CsaV3_6G032150
CsaV3_6G034230
CsaV3_6G034530
CsaV3_6G035540
CsaV3_6G035650
CsaV3_6G036330
CsaV3_6G036400
CsaV3_6G036420
CsaV3_6G036910
CsaV3_6G036920
CsaV3_6G037840
CsaV3_6G038030
CsaV3_6G038040
CsaV3_6G038160
CsaV3_6G038210
CsaV3_6G038370
CsaV3_6G038530
CsaV3_6G038880
CsaV3_6G038960
CsaV3_6G039040
CsaV3_6G039320
CsaV3_6G039830
CsaV3_6G040010
CsaV3_6G040210
CsaV3_6G040230
CsaV3_6G040380
CsaV3_6G040470
CsaV3_6G041270
CsaV3_6G041410
CsaV3_6G041490
CsaV3_6G041790
CsaV3_6G041820
CsaV3_6G041890
CsaV3_6G041900
CsaV3_6G041910
CsaV3_6G042480
CsaV3_6G042690
CsaV3_6G042940
CsaV3_6G043110
CsaV3_6G043240
CsaV3_6G043490
CsaV3_6G043650
CsaV3_6G043690
CsaV3_6G044200
CsaV3_6G044490
CsaV3_6G044900
CsaV3_6G044910
CsaV3_6G045620
CsaV3_6G045720
CsaV3_6G045850
CsaV3_6G045870
CsaV3_6G045880
CsaV3_6G045890
CsaV3_6G045990
CsaV3_6G046020
CsaV3_6G046050
CsaV3_6G046060
CsaV3_6G046070
CsaV3_6G046080
CsaV3_6G046220
CsaV3_6G046850
CsaV3_6G046900
CsaV3_6G047470
CsaV3_6G047500
CsaV3_6G047570
CsaV3_6G047920
CsaV3_6G048140
CsaV3_6G048700
CsaV3_6G048830
CsaV3_6G048880
CsaV3_6G049160
CsaV3_6G049240
CsaV3_6G049330
CsaV3_6G049380
CsaV3_6G049390
CsaV3_6G049650
CsaV3_6G050010
CsaV3_6G050150
CsaV3_6G050180
CsaV3_6G050350
CsaV3_6G050370
CsaV3_6G050420
CsaV3_6G050430
CsaV3_6G050770
CsaV3_6G050940
CsaV3_6G050990
CsaV3_6G051250
CsaV3_6G051370
CsaV3_6G051710
CsaV3_6G051770
CsaV3_6G052130
CsaV3_6G052420
CsaV3_6G052530
CsaV3_6G053070
CsaV3_7G000320
CsaV3_7G000610
CsaV3_7G000620
CsaV3_7G000950
CsaV3_7G001290
CsaV3_7G001300
CsaV3_7G001310
CsaV3_7G001330
CsaV3_7G001520
CsaV3_7G001550
CsaV3_7G001600
CsaV3_7G001610
CsaV3_7G001850
CsaV3_7G001880
CsaV3_7G002070
CsaV3_7G002220
CsaV3_7G002300
CsaV3_7G002560
CsaV3_7G002580
CsaV3_7G002700
CsaV3_7G002960
CsaV3_7G003150
CsaV3_7G003360
CsaV3_7G003520
CsaV3_7G003690
CsaV3_7G003880
CsaV3_7G005710
CsaV3_7G005990
CsaV3_7G006120
CsaV3_7G006580
CsaV3_7G006620
CsaV3_7G006630
CsaV3_7G006780
CsaV3_7G006790
CsaV3_7G007000
CsaV3_7G007160
CsaV3_7G007270
CsaV3_7G007480
CsaV3_7G007490
CsaV3_7G007630
CsaV3_7G008160
CsaV3_7G008360
CsaV3_7G008920
CsaV3_7G010080
CsaV3_7G014990
CsaV3_7G015020
CsaV3_7G015070
CsaV3_7G018510
CsaV3_7G018520
CsaV3_7G019950
CsaV3_7G021100
CsaV3_7G021130
CsaV3_7G021380
CsaV3_7G021440
CsaV3_7G021810
CsaV3_7G022030
CsaV3_7G022200
CsaV3_7G022480
CsaV3_7G022490
CsaV3_7G022630
CsaV3_7G022750
CsaV3_7G022810
CsaV3_7G022850
CsaV3_7G023440
CsaV3_7G023610
CsaV3_7G023620
CsaV3_7G023670
CsaV3_7G024350
CsaV3_7G024770
CsaV3_7G025260
CsaV3_7G025300
CsaV3_7G025420
CsaV3_7G025600
CsaV3_7G026300
CsaV3_7G026320
CsaV3_7G026520
CsaV3_7G026660
CsaV3_7G027040
CsaV3_7G027450
CsaV3_7G027650
CsaV3_7G027670
CsaV3_7G028090
CsaV3_7G028330
CsaV3_7G028420
CsaV3_7G028610
CsaV3_7G029270
CsaV3_7G029450
CsaV3_7G029770
CsaV3_7G030010
CsaV3_7G030150
CsaV3_7G030160
CsaV3_7G030230
CsaV3_7G030240
CsaV3_7G030580
CsaV3_7G030860
CsaV3_7G031260
CsaV3_7G032220
CsaV3_7G032230
CsaV3_7G032370
CsaV3_7G032380
CsaV3_7G032390
CsaV3_7G032540
CsaV3_7G032550
CsaV3_7G032570
CsaV3_7G032970
CsaV3_7G033350
CsaV3_7G034170
CsaV3_7G034600
CsaV3_7G034730
CsaV3_7G034990
CsaV3_7G035040
CsaV3_7G035360
CsaV3_UNG000020
CsaV3_UNG010110
CsaV3_UNG013130
CsaV3_UNG049340
CsaV3_UNG051400
CsaV3_UNG052410
CsaV3_UNG059470
CsaV3_UNG091710
CsaV3_UNG095720
CsaV3_UNG099740
CsaV3_UNG115940
CsaV3_UNG116960
CsaV3_UNG128990
CsaV3_UNG137060
CsaV3_UNG146120
CsaV3_UNG160190
CsaV3_UNG183400
CsaV3_UNG183410
CsaV3_UNG193490
CsaV3_UNG207980
CsaV3_UNG208720
CsaV3_UNG209140
CsaV3_UNG209250
CsaV3_UNG213460
CsaV3_UNG223610
CsaV3_UNG223620
CsaV3_UNG223630
CsaV3_UNG228990
CsaV3_UNG232170
CsaV3_UNG233340
CsaV3_UNG234380

## Sheet: MEdarkred_DEG260
CsaV3_1G000990
CsaV3_1G001790
CsaV3_1G001950
CsaV3_1G002120
CsaV3_1G004470
CsaV3_1G005600
CsaV3_1G006960
CsaV3_1G009130
CsaV3_1G010100
CsaV3_1G010800
CsaV3_1G012970
CsaV3_1G014260
CsaV3_1G019630
CsaV3_1G026730
CsaV3_1G028400
CsaV3_1G030670
CsaV3_1G031470
CsaV3_1G031480
CsaV3_1G032320
CsaV3_1G032510
CsaV3_1G033200
CsaV3_1G033960
CsaV3_1G036060
CsaV3_1G036750
CsaV3_1G037740
CsaV3_1G038560
CsaV3_1G038570
CsaV3_1G038630
CsaV3_1G039040
CsaV3_1G039090
CsaV3_1G040210
CsaV3_1G040420
CsaV3_1G042160
CsaV3_1G046670
CsaV3_2G000040
CsaV3_2G002110
CsaV3_2G002340
CsaV3_2G002680
CsaV3_2G003210
CsaV3_2G004350
CsaV3_2G004590
CsaV3_2G007590
CsaV3_2G007880
CsaV3_2G010820
CsaV3_2G013090
CsaV3_2G013310
CsaV3_2G015400
CsaV3_2G015980
CsaV3_2G016620
CsaV3_2G020860
CsaV3_2G024890
CsaV3_2G025290
CsaV3_2G026460
CsaV3_2G030790
CsaV3_2G031080
CsaV3_2G034040
CsaV3_2G034230
CsaV3_2G034310
CsaV3_2G035580
CsaV3_2G035960
CsaV3_3G000030
CsaV3_3G000070
CsaV3_3G000090
CsaV3_3G000400
CsaV3_3G001610
CsaV3_3G004060
CsaV3_3G005470
CsaV3_3G005490
CsaV3_3G007000
CsaV3_3G007150
CsaV3_3G009000
CsaV3_3G009860
CsaV3_3G012520
CsaV3_3G013300
CsaV3_3G013630
CsaV3_3G015580
CsaV3_3G017190
CsaV3_3G018160
CsaV3_3G018890
CsaV3_3G019770
CsaV3_3G020910
CsaV3_3G023480
CsaV3_3G026280
CsaV3_3G031080
CsaV3_3G031090
CsaV3_3G031260
CsaV3_3G031580
CsaV3_3G031690
CsaV3_3G032170
CsaV3_3G037790
CsaV3_3G038730
CsaV3_3G040930
CsaV3_3G040970
CsaV3_3G041140
CsaV3_3G041290
CsaV3_3G041980
CsaV3_3G045160
CsaV3_3G045260
CsaV3_3G045600
CsaV3_3G046150
CsaV3_3G047230
CsaV3_3G048490
CsaV3_3G048950
CsaV3_3G049200
CsaV3_4G000340
CsaV3_4G002150
CsaV3_4G002700
CsaV3_4G003510
CsaV3_4G003910
CsaV3_4G004480
CsaV3_4G004490
CsaV3_4G004570
CsaV3_4G007570
CsaV3_4G007600
CsaV3_4G007690
CsaV3_4G008810
CsaV3_4G009750
CsaV3_4G010050
CsaV3_4G010160
CsaV3_4G010570
CsaV3_4G011710
CsaV3_4G011720
CsaV3_4G014870
CsaV3_4G017650
CsaV3_4G017660
CsaV3_4G024780
CsaV3_4G026190
CsaV3_4G026500
CsaV3_4G027080
CsaV3_4G027170
CsaV3_4G028570
CsaV3_4G028880
CsaV3_4G030640
CsaV3_4G032440
CsaV3_4G032450
CsaV3_4G034340
CsaV3_4G037920
CsaV3_5G004550
CsaV3_5G004620
CsaV3_5G005170
CsaV3_5G005480
CsaV3_5G005990
CsaV3_5G006480
CsaV3_5G008200
CsaV3_5G008640
CsaV3_5G010370
CsaV3_5G012470
CsaV3_5G013830
CsaV3_5G014330
CsaV3_5G020680
CsaV3_5G023380
CsaV3_5G024230
CsaV3_5G024430
CsaV3_5G024620
CsaV3_5G024630
CsaV3_5G024640
CsaV3_5G025810
CsaV3_5G026860
CsaV3_5G026880
CsaV3_5G026970
CsaV3_5G028290
CsaV3_5G030000
CsaV3_5G030690
CsaV3_5G037240
CsaV3_5G038710
CsaV3_5G040100
CsaV3_6G005770
CsaV3_6G006680
CsaV3_6G008660
CsaV3_6G009030
CsaV3_6G009280
CsaV3_6G013590
CsaV3_6G014200
CsaV3_6G014370
CsaV3_6G015600
CsaV3_6G018750
CsaV3_6G019120
CsaV3_6G021560
CsaV3_6G021580
CsaV3_6G022090
CsaV3_6G022630
CsaV3_6G022640
CsaV3_6G024010
CsaV3_6G024170
CsaV3_6G029670
CsaV3_6G033600
CsaV3_6G036800
CsaV3_6G037870
CsaV3_6G038750
CsaV3_6G039090
CsaV3_6G041160
CsaV3_6G041290
CsaV3_6G042150
CsaV3_6G042160
CsaV3_6G042190
CsaV3_6G043230
CsaV3_6G043810
CsaV3_6G043940
CsaV3_6G044300
CsaV3_6G044320
CsaV3_6G044970
CsaV3_6G045060
CsaV3_6G045070
CsaV3_6G045130
CsaV3_6G045400
CsaV3_6G045830
CsaV3_6G046650
CsaV3_6G046670
CsaV3_6G047730
CsaV3_6G047740
CsaV3_6G048810
CsaV3_6G049080
CsaV3_6G049740
CsaV3_6G049820
CsaV3_6G050700
CsaV3_7G001510
CsaV3_7G002010
CsaV3_7G003750
CsaV3_7G003930
CsaV3_7G004080
CsaV3_7G004110
CsaV3_7G004460
CsaV3_7G004480
CsaV3_7G007350
CsaV3_7G007550
CsaV3_7G008340
CsaV3_7G010090
CsaV3_7G012620
CsaV3_7G016250
CsaV3_7G021030
CsaV3_7G023790
CsaV3_7G023950
CsaV3_7G024490
CsaV3_7G025100
CsaV3_7G025710
CsaV3_7G025720
CsaV3_7G026200
CsaV3_7G027000
CsaV3_7G028840
CsaV3_7G029550
CsaV3_7G029950
CsaV3_7G030380
CsaV3_7G033000
CsaV3_7G033570
CsaV3_UNG090700
CsaV3_UNG107770
CsaV3_UNG111850
CsaV3_UNG151160
CsaV3_UNG167240
CsaV3_UNG171360
CsaV3_UNG180380
CsaV3_UNG186470
CsaV3_UNG208820
CsaV3_UNG209060
CsaV3_UNG209470
CsaV3_UNG224630
CsaV3_UNG227930
CsaV3_UNG230090
CsaV3_UNG236470
CsaV3_UNG240560

## Sheet: MEGreenyellow_DEGS623
CsaV3_1G000090
CsaV3_1G002220
CsaV3_1G002770
CsaV3_1G002870
CsaV3_1G003000
CsaV3_1G003570
CsaV3_1G003920
CsaV3_1G004580
CsaV3_1G005020
CsaV3_1G005150
CsaV3_1G005870
CsaV3_1G006270
CsaV3_1G006280
CsaV3_1G006570
CsaV3_1G006610
CsaV3_1G007650
CsaV3_1G008260
CsaV3_1G008370
CsaV3_1G008740
CsaV3_1G009580
CsaV3_1G010300
CsaV3_1G011690
CsaV3_1G012850
CsaV3_1G013080
CsaV3_1G014190
CsaV3_1G014230
CsaV3_1G014320
CsaV3_1G014480
CsaV3_1G015190
CsaV3_1G015540
CsaV3_1G015670
CsaV3_1G015700
CsaV3_1G017120
CsaV3_1G017180
CsaV3_1G017250
CsaV3_1G022960
CsaV3_1G028740
CsaV3_1G029640
CsaV3_1G029720
CsaV3_1G030600
CsaV3_1G030740
CsaV3_1G030930
CsaV3_1G031070
CsaV3_1G031120
CsaV3_1G031310
CsaV3_1G031550
CsaV3_1G031780
CsaV3_1G032160
CsaV3_1G032290
CsaV3_1G032420
CsaV3_1G032500
CsaV3_1G035730
CsaV3_1G036080
CsaV3_1G036980
CsaV3_1G037910
CsaV3_1G039140
CsaV3_1G039290
CsaV3_1G039600
CsaV3_1G039680
CsaV3_1G040270
CsaV3_1G040680
CsaV3_1G040730
CsaV3_1G041040
CsaV3_1G041820
CsaV3_1G042090
CsaV3_1G042200
CsaV3_1G042530
CsaV3_1G042970
CsaV3_1G043750
CsaV3_1G044170
CsaV3_1G044380
CsaV3_1G044590
CsaV3_1G045050
CsaV3_1G045520
CsaV3_1G046040
CsaV3_1G046350
CsaV3_2G001450
CsaV3_2G001670
CsaV3_2G001940
CsaV3_2G002930
CsaV3_2G003300
CsaV3_2G003840
CsaV3_2G004380
CsaV3_2G005070
CsaV3_2G005340
CsaV3_2G007380
CsaV3_2G007640
CsaV3_2G007690
CsaV3_2G008060
CsaV3_2G008590
CsaV3_2G008740
CsaV3_2G009120
CsaV3_2G009260
CsaV3_2G009500
CsaV3_2G009710
CsaV3_2G009900
CsaV3_2G010040
CsaV3_2G010210
CsaV3_2G010320
CsaV3_2G011030
CsaV3_2G011200
CsaV3_2G011320
CsaV3_2G011350
CsaV3_2G011420
CsaV3_2G012350
CsaV3_2G013950
CsaV3_2G015030
CsaV3_2G016590
CsaV3_2G016790
CsaV3_2G017430
CsaV3_2G017460
CsaV3_2G017480
CsaV3_2G017840
CsaV3_2G021130
CsaV3_2G024220
CsaV3_2G025600
CsaV3_2G025910
CsaV3_2G026450
CsaV3_2G027790
CsaV3_2G029390
CsaV3_2G029760
CsaV3_2G029890
CsaV3_2G030640
CsaV3_2G030820
CsaV3_2G030830
CsaV3_2G031370
CsaV3_2G031620
CsaV3_2G032500
CsaV3_2G032630
CsaV3_2G032640
CsaV3_2G034610
CsaV3_2G035310
CsaV3_2G035810
CsaV3_3G000120
CsaV3_3G000340
CsaV3_3G001850
CsaV3_3G001880
CsaV3_3G002860
CsaV3_3G003760
CsaV3_3G004340
CsaV3_3G004530
CsaV3_3G004890
CsaV3_3G005600
CsaV3_3G005800
CsaV3_3G006820
CsaV3_3G007580
CsaV3_3G007920
CsaV3_3G008130
CsaV3_3G008380
CsaV3_3G010810
CsaV3_3G012500
CsaV3_3G012790
CsaV3_3G013280
CsaV3_3G013520
CsaV3_3G014230
CsaV3_3G014920
CsaV3_3G015170
CsaV3_3G015700
CsaV3_3G016660
CsaV3_3G016670
CsaV3_3G016830
CsaV3_3G018940
CsaV3_3G019180
CsaV3_3G020090
CsaV3_3G020510
CsaV3_3G020560
CsaV3_3G021290
CsaV3_3G021950
CsaV3_3G021990
CsaV3_3G022010
CsaV3_3G022140
CsaV3_3G022470
CsaV3_3G022500
CsaV3_3G022650
CsaV3_3G023280
CsaV3_3G025170
CsaV3_3G027120
CsaV3_3G027170
CsaV3_3G027410
CsaV3_3G028240
CsaV3_3G028250
CsaV3_3G028470
CsaV3_3G028640
CsaV3_3G028650
CsaV3_3G030300
CsaV3_3G030780
CsaV3_3G030900
CsaV3_3G031120
CsaV3_3G032230
CsaV3_3G033300
CsaV3_3G033310
CsaV3_3G033450
CsaV3_3G033530
CsaV3_3G033710
CsaV3_3G034040
CsaV3_3G034110
CsaV3_3G034580
CsaV3_3G034780
CsaV3_3G034810
CsaV3_3G034830
CsaV3_3G035050
CsaV3_3G035060
CsaV3_3G035310
CsaV3_3G036640
CsaV3_3G036950
CsaV3_3G037100
CsaV3_3G037120
CsaV3_3G037200
CsaV3_3G037250
CsaV3_3G037800
CsaV3_3G038390
CsaV3_3G038400
CsaV3_3G038880
CsaV3_3G039550
CsaV3_3G039990
CsaV3_3G041150
CsaV3_3G041220
CsaV3_3G041880
CsaV3_3G042560
CsaV3_3G043230
CsaV3_3G044600
CsaV3_3G044660
CsaV3_3G044980
CsaV3_3G045070
CsaV3_3G045360
CsaV3_3G045810
CsaV3_3G046830
CsaV3_3G047070
CsaV3_3G047190
CsaV3_3G047320
CsaV3_3G048170
CsaV3_3G048550
CsaV3_3G048700
CsaV3_3G049130
CsaV3_3G049640
CsaV3_3G049960
CsaV3_3G050030
CsaV3_4G000600
CsaV3_4G000710
CsaV3_4G001710
CsaV3_4G002010
CsaV3_4G003060
CsaV3_4G003120
CsaV3_4G003650
CsaV3_4G003700
CsaV3_4G003740
CsaV3_4G003850
CsaV3_4G004010
CsaV3_4G004210
CsaV3_4G004610
CsaV3_4G004700
CsaV3_4G005180
CsaV3_4G005540
CsaV3_4G006140
CsaV3_4G006290
CsaV3_4G008080
CsaV3_4G008110
CsaV3_4G008340
CsaV3_4G008610
CsaV3_4G009000
CsaV3_4G009240
CsaV3_4G009260
CsaV3_4G010170
CsaV3_4G012130
CsaV3_4G013240
CsaV3_4G013510
CsaV3_4G014810
CsaV3_4G019790
CsaV3_4G023380
CsaV3_4G023690
CsaV3_4G024320
CsaV3_4G024630
CsaV3_4G025340
CsaV3_4G025350
CsaV3_4G025610
CsaV3_4G026120
CsaV3_4G026280
CsaV3_4G026460
CsaV3_4G027110
CsaV3_4G027420
CsaV3_4G027430
CsaV3_4G028730
CsaV3_4G028960
CsaV3_4G029690
CsaV3_4G030220
CsaV3_4G030610
CsaV3_4G030630
CsaV3_4G030760
CsaV3_4G030800
CsaV3_4G030870
CsaV3_4G031870
CsaV3_4G032190
CsaV3_4G033490
CsaV3_4G034170
CsaV3_4G034980
CsaV3_4G035000
CsaV3_4G035990
CsaV3_4G036500
CsaV3_4G036720
CsaV3_4G037080
CsaV3_4G037160
CsaV3_4G037540
CsaV3_4G037640
CsaV3_5G000310
CsaV3_5G000360
CsaV3_5G000510
CsaV3_5G000520
CsaV3_5G000530
CsaV3_5G000660
CsaV3_5G001230
CsaV3_5G001400
CsaV3_5G001660
CsaV3_5G001760
CsaV3_5G001910
CsaV3_5G002180
CsaV3_5G002400
CsaV3_5G003220
CsaV3_5G003330
CsaV3_5G003540
CsaV3_5G003810
CsaV3_5G004570
CsaV3_5G005080
CsaV3_5G005510
CsaV3_5G005560
CsaV3_5G006610
CsaV3_5G006660
CsaV3_5G008260
CsaV3_5G008910
CsaV3_5G010610
CsaV3_5G010850
CsaV3_5G012490
CsaV3_5G013000
CsaV3_5G013060
CsaV3_5G015550
CsaV3_5G015610
CsaV3_5G015920
CsaV3_5G017060
CsaV3_5G017170
CsaV3_5G017510
CsaV3_5G020120
CsaV3_5G023220
CsaV3_5G023400
CsaV3_5G025420
CsaV3_5G025710
CsaV3_5G026870
CsaV3_5G027300
CsaV3_5G027650
CsaV3_5G028060
CsaV3_5G028960
CsaV3_5G029000
CsaV3_5G029100
CsaV3_5G029110
CsaV3_5G029460
CsaV3_5G030440
CsaV3_5G030590
CsaV3_5G032420
CsaV3_5G032870
CsaV3_5G034120
CsaV3_5G034880
CsaV3_5G034990
CsaV3_5G035080
CsaV3_5G035620
CsaV3_5G035650
CsaV3_5G036500
CsaV3_5G036530
CsaV3_5G036540
CsaV3_5G036990
CsaV3_5G037000
CsaV3_5G037150
CsaV3_5G037290
CsaV3_5G037330
CsaV3_5G037370
CsaV3_5G037570
CsaV3_5G037640
CsaV3_5G038390
CsaV3_5G039060
CsaV3_5G039080
CsaV3_5G039090
CsaV3_5G039240
CsaV3_5G040170
CsaV3_5G040180
CsaV3_6G000630
CsaV3_6G000710
CsaV3_6G000910
CsaV3_6G001660
CsaV3_6G001870
CsaV3_6G003120
CsaV3_6G003560
CsaV3_6G003660
CsaV3_6G003790
CsaV3_6G004110
CsaV3_6G004570
CsaV3_6G004780
CsaV3_6G004960
CsaV3_6G005260
CsaV3_6G005290
CsaV3_6G005790
CsaV3_6G006030
CsaV3_6G006560
CsaV3_6G007120
CsaV3_6G007130
CsaV3_6G007520
CsaV3_6G007530
CsaV3_6G007670
CsaV3_6G007970
CsaV3_6G007980
CsaV3_6G008470
CsaV3_6G008530
CsaV3_6G008600
CsaV3_6G008610
CsaV3_6G008980
CsaV3_6G008990
CsaV3_6G009300
CsaV3_6G009630
CsaV3_6G010110
CsaV3_6G012680
CsaV3_6G013390
CsaV3_6G013480
CsaV3_6G014290
CsaV3_6G015120
CsaV3_6G015130
CsaV3_6G015280
CsaV3_6G016020
CsaV3_6G016740
CsaV3_6G017010
CsaV3_6G017150
CsaV3_6G017380
CsaV3_6G018500
CsaV3_6G018520
CsaV3_6G018720
CsaV3_6G021660
CsaV3_6G021720
CsaV3_6G021990
CsaV3_6G022380
CsaV3_6G022470
CsaV3_6G022710
CsaV3_6G022770
CsaV3_6G025210
CsaV3_6G028570
CsaV3_6G028580
CsaV3_6G031000
CsaV3_6G031760
CsaV3_6G031920
CsaV3_6G032230
CsaV3_6G032490
CsaV3_6G032500
CsaV3_6G032560
CsaV3_6G033570
CsaV3_6G033640
CsaV3_6G034170
CsaV3_6G035950
CsaV3_6G035960
CsaV3_6G036060
CsaV3_6G036100
CsaV3_6G037990
CsaV3_6G038700
CsaV3_6G038860
CsaV3_6G039240
CsaV3_6G039270
CsaV3_6G039670
CsaV3_6G039940
CsaV3_6G040270
CsaV3_6G040350
CsaV3_6G040760
CsaV3_6G041060
CsaV3_6G041110
CsaV3_6G041700
CsaV3_6G042060
CsaV3_6G042930
CsaV3_6G043160
CsaV3_6G043780
CsaV3_6G043830
CsaV3_6G044000
CsaV3_6G044870
CsaV3_6G046100
CsaV3_6G046200
CsaV3_6G046370
CsaV3_6G046550
CsaV3_6G047070
CsaV3_6G047210
CsaV3_6G047350
CsaV3_6G047420
CsaV3_6G048430
CsaV3_6G049290
CsaV3_6G049880
CsaV3_6G050040
CsaV3_6G050160
CsaV3_6G050230
CsaV3_6G050410
CsaV3_6G050570
CsaV3_6G050780
CsaV3_6G050850
CsaV3_6G051190
CsaV3_6G052060
CsaV3_6G052160
CsaV3_7G000190
CsaV3_7G000220
CsaV3_7G000270
CsaV3_7G000520
CsaV3_7G000790
CsaV3_7G001070
CsaV3_7G001720
CsaV3_7G002500
CsaV3_7G005530
CsaV3_7G006170
CsaV3_7G006180
CsaV3_7G006550
CsaV3_7G006680
CsaV3_7G007400
CsaV3_7G007620
CsaV3_7G007720
CsaV3_7G007840
CsaV3_7G008030
CsaV3_7G008070
CsaV3_7G008490
CsaV3_7G008590
CsaV3_7G010050
CsaV3_7G011430
CsaV3_7G014960
CsaV3_7G015010
CsaV3_7G021010
CsaV3_7G021420
CsaV3_7G021470
CsaV3_7G022310
CsaV3_7G022470
CsaV3_7G022500
CsaV3_7G022730
CsaV3_7G023540
CsaV3_7G023700
CsaV3_7G023750
CsaV3_7G024940
CsaV3_7G025270
CsaV3_7G025450
CsaV3_7G025950
CsaV3_7G026480
CsaV3_7G026640
CsaV3_7G026670
CsaV3_7G027600
CsaV3_7G027990
CsaV3_7G028010
CsaV3_7G028020
CsaV3_7G028860
CsaV3_7G029140
CsaV3_7G029360
CsaV3_7G029490
CsaV3_7G030100
CsaV3_7G030110
CsaV3_7G030210
CsaV3_7G030750
CsaV3_7G032430
CsaV3_7G032640
CsaV3_7G032870
CsaV3_7G033880
CsaV3_7G034680
CsaV3_7G034800
CsaV3_7G034840
CsaV3_7G034860
CsaV3_7G035210
CsaV3_7G035270
CsaV3_UNG019130
CsaV3_UNG047340
CsaV3_UNG066520
CsaV3_UNG069570
CsaV3_UNG126970
CsaV3_UNG147140
CsaV3_UNG153160
CsaV3_UNG160170
CsaV3_UNG160180
CsaV3_UNG170330
CsaV3_UNG174360
CsaV3_UNG186450
CsaV3_UNG201590
CsaV3_UNG203620
CsaV3_UNG203640
CsaV3_UNG203660
CsaV3_UNG205710
CsaV3_UNG207720
CsaV3_UNG207850
CsaV3_UNG207860
CsaV3_UNG207880
CsaV3_UNG207890
CsaV3_UNG207910
CsaV3_UNG207950
CsaV3_UNG208010
CsaV3_UNG208040
CsaV3_UNG208080
CsaV3_UNG208150
CsaV3_UNG208250
CsaV3_UNG208270
CsaV3_UNG208370
CsaV3_UNG208400
CsaV3_UNG208560
CsaV3_UNG208570
CsaV3_UNG208590
CsaV3_UNG208640
CsaV3_UNG208650
CsaV3_UNG208780
CsaV3_UNG208790
CsaV3_UNG208800
CsaV3_UNG208890
CsaV3_UNG208940
CsaV3_UNG209030
CsaV3_UNG209040
CsaV3_UNG209100
CsaV3_UNG209320
CsaV3_UNG209330
CsaV3_UNG209360
CsaV3_UNG209390
CsaV3_UNG209420
CsaV3_UNG209450
CsaV3_UNG209460
CsaV3_UNG209580
CsaV3_UNG209750
CsaV3_UNG209800
CsaV3_UNG209830
CsaV3_UNG209870
CsaV3_UNG209880
CsaV3_UNG209890
CsaV3_UNG210010
CsaV3_UNG210050
CsaV3_UNG223560
CsaV3_UNG234370
CsaV3_UNG239520

## Sheet: MEgreen_DEGs 1617
CsaV3_1G000070
CsaV3_1G000120
CsaV3_1G000140
CsaV3_1G000170
CsaV3_1G000380
CsaV3_1G000480
CsaV3_1G000690
CsaV3_1G000700
CsaV3_1G000710
CsaV3_1G000750
CsaV3_1G000940
CsaV3_1G001040
CsaV3_1G001290
CsaV3_1G001310
CsaV3_1G001440
CsaV3_1G001660
CsaV3_1G001890
CsaV3_1G001960
CsaV3_1G002020
CsaV3_1G002070
CsaV3_1G002190
CsaV3_1G002420
CsaV3_1G002460
CsaV3_1G002700
CsaV3_1G002970
CsaV3_1G003090
CsaV3_1G003120
CsaV3_1G003130
CsaV3_1G003230
CsaV3_1G003250
CsaV3_1G003380
CsaV3_1G003550
CsaV3_1G003610
CsaV3_1G003670
CsaV3_1G003680
CsaV3_1G003690
CsaV3_1G003900
CsaV3_1G003970
CsaV3_1G004120
CsaV3_1G004280
CsaV3_1G004320
CsaV3_1G004330
CsaV3_1G004400
CsaV3_1G004550
CsaV3_1G004560
CsaV3_1G004650
CsaV3_1G004710
CsaV3_1G004800
CsaV3_1G004910
CsaV3_1G004950
CsaV3_1G005170
CsaV3_1G005500
CsaV3_1G005780
CsaV3_1G006150
CsaV3_1G006160
CsaV3_1G006300
CsaV3_1G006370
CsaV3_1G006430
CsaV3_1G006500
CsaV3_1G007110
CsaV3_1G007670
CsaV3_1G007730
CsaV3_1G007740
CsaV3_1G007960
CsaV3_1G007990
CsaV3_1G008060
CsaV3_1G008150
CsaV3_1G008210
CsaV3_1G008250
CsaV3_1G008280
CsaV3_1G008720
CsaV3_1G008730
CsaV3_1G008750
CsaV3_1G008800
CsaV3_1G008850
CsaV3_1G009230
CsaV3_1G009240
CsaV3_1G009310
CsaV3_1G009340
CsaV3_1G009350
CsaV3_1G009410
CsaV3_1G009430
CsaV3_1G009500
CsaV3_1G009620
CsaV3_1G009630
CsaV3_1G009660
CsaV3_1G009670
CsaV3_1G009790
CsaV3_1G010170
CsaV3_1G010530
CsaV3_1G010620
CsaV3_1G010720
CsaV3_1G010990
CsaV3_1G011000
CsaV3_1G011070
CsaV3_1G011180
CsaV3_1G011480
CsaV3_1G011510
CsaV3_1G011540
CsaV3_1G012000
CsaV3_1G012030
CsaV3_1G012180
CsaV3_1G012270
CsaV3_1G012540
CsaV3_1G012630
CsaV3_1G012650
CsaV3_1G012740
CsaV3_1G012920
CsaV3_1G012980
CsaV3_1G013060
CsaV3_1G013140
CsaV3_1G013150
CsaV3_1G013170
CsaV3_1G013210
CsaV3_1G013280
CsaV3_1G013400
CsaV3_1G013540
CsaV3_1G013920
CsaV3_1G014090
CsaV3_1G014110
CsaV3_1G014420
CsaV3_1G014700
CsaV3_1G014820
CsaV3_1G014890
CsaV3_1G014900
CsaV3_1G015020
CsaV3_1G015180
CsaV3_1G015280
CsaV3_1G015490
CsaV3_1G015630
CsaV3_1G015710
CsaV3_1G015800
CsaV3_1G017080
CsaV3_1G017210
CsaV3_1G018390
CsaV3_1G018470
CsaV3_1G024140
CsaV3_1G024160
CsaV3_1G027860
CsaV3_1G027890
CsaV3_1G028620
CsaV3_1G029000
CsaV3_1G029030
CsaV3_1G029250
CsaV3_1G029390
CsaV3_1G029460
CsaV3_1G029500
CsaV3_1G029520
CsaV3_1G029940
CsaV3_1G030400
CsaV3_1G030450
CsaV3_1G030750
CsaV3_1G030810
CsaV3_1G031330
CsaV3_1G031860
CsaV3_1G031890
CsaV3_1G032190
CsaV3_1G032200
CsaV3_1G032330
CsaV3_1G032580
CsaV3_1G032590
CsaV3_1G032850
CsaV3_1G032930
CsaV3_1G033360
CsaV3_1G033400
CsaV3_1G033760
CsaV3_1G033780
CsaV3_1G034080
CsaV3_1G034340
CsaV3_1G034410
CsaV3_1G034450
CsaV3_1G034490
CsaV3_1G034510
CsaV3_1G034560
CsaV3_1G035760
CsaV3_1G035920
CsaV3_1G036190
CsaV3_1G036250
CsaV3_1G036300
CsaV3_1G036510
CsaV3_1G036550
CsaV3_1G036570
CsaV3_1G036580
CsaV3_1G036670
CsaV3_1G037010
CsaV3_1G037190
CsaV3_1G037220
CsaV3_1G037230
CsaV3_1G037290
CsaV3_1G037320
CsaV3_1G037420
CsaV3_1G037430
CsaV3_1G037930
CsaV3_1G038020
CsaV3_1G038230
CsaV3_1G038500
CsaV3_1G038550
CsaV3_1G038870
CsaV3_1G039150
CsaV3_1G039170
CsaV3_1G039190
CsaV3_1G039880
CsaV3_1G039970
CsaV3_1G040030
CsaV3_1G040040
CsaV3_1G040070
CsaV3_1G040170
CsaV3_1G040260
CsaV3_1G040710
CsaV3_1G040780
CsaV3_1G041110
CsaV3_1G041200
CsaV3_1G041210
CsaV3_1G041430
CsaV3_1G041520
CsaV3_1G041590
CsaV3_1G041660
CsaV3_1G041720
CsaV3_1G041780
CsaV3_1G041960
CsaV3_1G041990
CsaV3_1G042030
CsaV3_1G042240
CsaV3_1G042250
CsaV3_1G042260
CsaV3_1G042350
CsaV3_1G042390
CsaV3_1G042610
CsaV3_1G042620
CsaV3_1G042760
CsaV3_1G042840
CsaV3_1G043040
CsaV3_1G043080
CsaV3_1G043470
CsaV3_1G043610
CsaV3_1G043860
CsaV3_1G044290
CsaV3_1G044450
CsaV3_1G044500
CsaV3_1G045360
CsaV3_1G045810
CsaV3_1G046050
CsaV3_1G046190
CsaV3_1G046250
CsaV3_2G001230
CsaV3_2G001310
CsaV3_2G001370
CsaV3_2G001620
CsaV3_2G002010
CsaV3_2G002130
CsaV3_2G002140
CsaV3_2G002260
CsaV3_2G002320
CsaV3_2G002510
CsaV3_2G002740
CsaV3_2G002870
CsaV3_2G003060
CsaV3_2G003120
CsaV3_2G003320
CsaV3_2G003340
CsaV3_2G003460
CsaV3_2G003500
CsaV3_2G003560
CsaV3_2G003820
CsaV3_2G003910
CsaV3_2G004020
CsaV3_2G004270
CsaV3_2G004290
CsaV3_2G004410
CsaV3_2G004960
CsaV3_2G005240
CsaV3_2G005250
CsaV3_2G005300
CsaV3_2G005370
CsaV3_2G006500
CsaV3_2G006510
CsaV3_2G006550
CsaV3_2G006590
CsaV3_2G006750
CsaV3_2G006800
CsaV3_2G006920
CsaV3_2G006960
CsaV3_2G007030
CsaV3_2G007320
CsaV3_2G007400
CsaV3_2G007740
CsaV3_2G007830
CsaV3_2G008030
CsaV3_2G008050
CsaV3_2G008210
CsaV3_2G008240
CsaV3_2G008300
CsaV3_2G008340
CsaV3_2G008420
CsaV3_2G008440
CsaV3_2G008460
CsaV3_2G008510
CsaV3_2G008530
CsaV3_2G008570
CsaV3_2G008820
CsaV3_2G008840
CsaV3_2G009000
CsaV3_2G009060
CsaV3_2G009650
CsaV3_2G009840
CsaV3_2G009870
CsaV3_2G010110
CsaV3_2G010280
CsaV3_2G010370
CsaV3_2G010450
CsaV3_2G010480
CsaV3_2G010660
CsaV3_2G010690
CsaV3_2G010800
CsaV3_2G010810
CsaV3_2G011110
CsaV3_2G011220
CsaV3_2G011300
CsaV3_2G011540
CsaV3_2G011670
CsaV3_2G012300
CsaV3_2G012340
CsaV3_2G012400
CsaV3_2G012510
CsaV3_2G012700
CsaV3_2G013070
CsaV3_2G013100
CsaV3_2G013240
CsaV3_2G013320
CsaV3_2G013340
CsaV3_2G013370
CsaV3_2G013510
CsaV3_2G013770
CsaV3_2G013830
CsaV3_2G014200
CsaV3_2G014210
CsaV3_2G014280
CsaV3_2G014470
CsaV3_2G014910
CsaV3_2G015000
CsaV3_2G015110
CsaV3_2G015210
CsaV3_2G015310
CsaV3_2G015380
CsaV3_2G015420
CsaV3_2G015430
CsaV3_2G015470
CsaV3_2G015510
CsaV3_2G015620
CsaV3_2G015990
CsaV3_2G016060
CsaV3_2G016190
CsaV3_2G016420
CsaV3_2G016530
CsaV3_2G017140
CsaV3_2G017270
CsaV3_2G017540
CsaV3_2G017550
CsaV3_2G017640
CsaV3_2G017980
CsaV3_2G018160
CsaV3_2G018180
CsaV3_2G018190
CsaV3_2G018300
CsaV3_2G018310
CsaV3_2G019440
CsaV3_2G019510
CsaV3_2G021010
CsaV3_2G021050
CsaV3_2G021070
CsaV3_2G022190
CsaV3_2G024310
CsaV3_2G024320
CsaV3_2G024410
CsaV3_2G024500
CsaV3_2G024610
CsaV3_2G024660
CsaV3_2G024700
CsaV3_2G024770
CsaV3_2G024910
CsaV3_2G025080
CsaV3_2G025250
CsaV3_2G025300
CsaV3_2G026020
CsaV3_2G026130
CsaV3_2G026260
CsaV3_2G026300
CsaV3_2G026360
CsaV3_2G026510
CsaV3_2G028140
CsaV3_2G028150
CsaV3_2G028300
CsaV3_2G028630
CsaV3_2G028710
CsaV3_2G029030
CsaV3_2G029050
CsaV3_2G029290
CsaV3_2G029740
CsaV3_2G030190
CsaV3_2G030370
CsaV3_2G030420
CsaV3_2G030500
CsaV3_2G030520
CsaV3_2G030570
CsaV3_2G030730
CsaV3_2G031090
CsaV3_2G031270
CsaV3_2G031500
CsaV3_2G031540
CsaV3_2G031600
CsaV3_2G031770
CsaV3_2G031850
CsaV3_2G032320
CsaV3_2G032350
CsaV3_2G032370
CsaV3_2G032570
CsaV3_2G032680
CsaV3_2G032910
CsaV3_2G033030
CsaV3_2G033310
CsaV3_2G033380
CsaV3_2G033520
CsaV3_2G034130
CsaV3_2G034150
CsaV3_2G034210
CsaV3_2G034270
CsaV3_2G034540
CsaV3_2G034580
CsaV3_2G034600
CsaV3_2G034680
CsaV3_2G034730
CsaV3_2G034930
CsaV3_2G035050
CsaV3_2G035460
CsaV3_2G035490
CsaV3_2G035950
CsaV3_2G036330
CsaV3_2G036340
CsaV3_2G036590
CsaV3_3G000200
CsaV3_3G000640
CsaV3_3G000920
CsaV3_3G001280
CsaV3_3G001380
CsaV3_3G001570
CsaV3_3G001630
CsaV3_3G001680
CsaV3_3G001860
CsaV3_3G002020
CsaV3_3G002090
CsaV3_3G002170
CsaV3_3G002290
CsaV3_3G002360
CsaV3_3G002430
CsaV3_3G002560
CsaV3_3G002580
CsaV3_3G002730
CsaV3_3G002800
CsaV3_3G002880
CsaV3_3G002950
CsaV3_3G002980
CsaV3_3G003140
CsaV3_3G003180
CsaV3_3G003530
CsaV3_3G003550
CsaV3_3G003630
CsaV3_3G003640
CsaV3_3G003680
CsaV3_3G003720
CsaV3_3G003770
CsaV3_3G004110
CsaV3_3G004160
CsaV3_3G004430
CsaV3_3G004580
CsaV3_3G004760
CsaV3_3G004770
CsaV3_3G005040
CsaV3_3G005180
CsaV3_3G005350
CsaV3_3G005520
CsaV3_3G006740
CsaV3_3G007100
CsaV3_3G007170
CsaV3_3G007570
CsaV3_3G007720
CsaV3_3G007770
CsaV3_3G008070
CsaV3_3G008210
CsaV3_3G008340
CsaV3_3G008430
CsaV3_3G008470
CsaV3_3G008690
CsaV3_3G008990
CsaV3_3G009100
CsaV3_3G009430
CsaV3_3G009550
CsaV3_3G009610
CsaV3_3G009740
CsaV3_3G009890
CsaV3_3G009930
CsaV3_3G009990
CsaV3_3G010020
CsaV3_3G010250
CsaV3_3G010300
CsaV3_3G010400
CsaV3_3G010410
CsaV3_3G010430
CsaV3_3G010470
CsaV3_3G010540
CsaV3_3G010610
CsaV3_3G010690
CsaV3_3G010700
CsaV3_3G010710
CsaV3_3G010970
CsaV3_3G011000
CsaV3_3G011130
CsaV3_3G011150
CsaV3_3G011330
CsaV3_3G011360
CsaV3_3G011600
CsaV3_3G011680
CsaV3_3G011880
CsaV3_3G011930
CsaV3_3G012000
CsaV3_3G012090
CsaV3_3G012290
CsaV3_3G012480
CsaV3_3G012600
CsaV3_3G012680
CsaV3_3G012740
CsaV3_3G012750
CsaV3_3G012850
CsaV3_3G012950
CsaV3_3G013030
CsaV3_3G013040
CsaV3_3G013090
CsaV3_3G013600
CsaV3_3G013640
CsaV3_3G014130
CsaV3_3G014190
CsaV3_3G014200
CsaV3_3G014290
CsaV3_3G014330
CsaV3_3G014630
CsaV3_3G014650
CsaV3_3G014930
CsaV3_3G015040
CsaV3_3G015150
CsaV3_3G015380
CsaV3_3G015430
CsaV3_3G015480
CsaV3_3G015690
CsaV3_3G015820
CsaV3_3G015910
CsaV3_3G015930
CsaV3_3G016100
CsaV3_3G016190
CsaV3_3G016250
CsaV3_3G016600
CsaV3_3G016940
CsaV3_3G017240
CsaV3_3G017320
CsaV3_3G017330
CsaV3_3G017430
CsaV3_3G017530
CsaV3_3G017760
CsaV3_3G017880
CsaV3_3G018040
CsaV3_3G018550
CsaV3_3G019240
CsaV3_3G019280
CsaV3_3G019490
CsaV3_3G019570
CsaV3_3G019750
CsaV3_3G019800
CsaV3_3G019810
CsaV3_3G019840
CsaV3_3G019950
CsaV3_3G020110
CsaV3_3G020460
CsaV3_3G020470
CsaV3_3G020570
CsaV3_3G020650
CsaV3_3G020720
CsaV3_3G020880
CsaV3_3G020970
CsaV3_3G021110
CsaV3_3G021260
CsaV3_3G021590
CsaV3_3G021710
CsaV3_3G021720
CsaV3_3G021760
CsaV3_3G021770
CsaV3_3G021780
CsaV3_3G021790
CsaV3_3G021940
CsaV3_3G022220
CsaV3_3G022420
CsaV3_3G022530
CsaV3_3G022540
CsaV3_3G022680
CsaV3_3G022910
CsaV3_3G023250
CsaV3_3G023420
CsaV3_3G023520
CsaV3_3G023810
CsaV3_3G024950
CsaV3_3G024970
CsaV3_3G025050
CsaV3_3G026200
CsaV3_3G026230
CsaV3_3G026550
CsaV3_3G026840
CsaV3_3G026870
CsaV3_3G027150
CsaV3_3G027560
CsaV3_3G027630
CsaV3_3G027700
CsaV3_3G027710
CsaV3_3G028010
CsaV3_3G028190
CsaV3_3G028200
CsaV3_3G028560
CsaV3_3G028580
CsaV3_3G028700
CsaV3_3G028850
CsaV3_3G030020
CsaV3_3G030190
CsaV3_3G030260
CsaV3_3G030280
CsaV3_3G030550
CsaV3_3G030800
CsaV3_3G030850
CsaV3_3G030970
CsaV3_3G031410
CsaV3_3G032280
CsaV3_3G032360
CsaV3_3G032370
CsaV3_3G032390
CsaV3_3G032440
CsaV3_3G032470
CsaV3_3G032610
CsaV3_3G032650
CsaV3_3G032820
CsaV3_3G032940
CsaV3_3G033100
CsaV3_3G033250
CsaV3_3G033260
CsaV3_3G033400
CsaV3_3G033430
CsaV3_3G033440
CsaV3_3G033500
CsaV3_3G033720
CsaV3_3G033750
CsaV3_3G034070
CsaV3_3G034260
CsaV3_3G034330
CsaV3_3G034550
CsaV3_3G034980
CsaV3_3G035140
CsaV3_3G035150
CsaV3_3G035280
CsaV3_3G035320
CsaV3_3G035520
CsaV3_3G035810
CsaV3_3G035840
CsaV3_3G036070
CsaV3_3G036410
CsaV3_3G036550
CsaV3_3G036570
CsaV3_3G036580
CsaV3_3G036650
CsaV3_3G036750
CsaV3_3G036760
CsaV3_3G036800
CsaV3_3G036980
CsaV3_3G037360
CsaV3_3G037440
CsaV3_3G037500
CsaV3_3G037660
CsaV3_3G037920
CsaV3_3G037970
CsaV3_3G038170
CsaV3_3G038300
CsaV3_3G038410
CsaV3_3G038440
CsaV3_3G038450
CsaV3_3G038590
CsaV3_3G038800
CsaV3_3G038820
CsaV3_3G038950
CsaV3_3G038970
CsaV3_3G039020
CsaV3_3G039120
CsaV3_3G039400
CsaV3_3G039490
CsaV3_3G039600
CsaV3_3G039810
CsaV3_3G040030
CsaV3_3G040270
CsaV3_3G040360
CsaV3_3G040420
CsaV3_3G040530
CsaV3_3G040840
CsaV3_3G040950
CsaV3_3G041020
CsaV3_3G041090
CsaV3_3G041190
CsaV3_3G041210
CsaV3_3G041620
CsaV3_3G041700
CsaV3_3G041750
CsaV3_3G041910
CsaV3_3G042070
CsaV3_3G042120
CsaV3_3G042140
CsaV3_3G042180
CsaV3_3G042410
CsaV3_3G042510
CsaV3_3G042530
CsaV3_3G042540
CsaV3_3G042780
CsaV3_3G042830
CsaV3_3G042990
CsaV3_3G043020
CsaV3_3G043160
CsaV3_3G043270
CsaV3_3G043280
CsaV3_3G043390
CsaV3_3G043470
CsaV3_3G043800
CsaV3_3G043900
CsaV3_3G044110
CsaV3_3G044150
CsaV3_3G044180
CsaV3_3G044230
CsaV3_3G044260
CsaV3_3G044400
CsaV3_3G044490
CsaV3_3G045010
CsaV3_3G045370
CsaV3_3G045560
CsaV3_3G045760
CsaV3_3G045770
CsaV3_3G045780
CsaV3_3G046180
CsaV3_3G046200
CsaV3_3G046420
CsaV3_3G046500
CsaV3_3G046510
CsaV3_3G046590
CsaV3_3G046660
CsaV3_3G046730
CsaV3_3G046800
CsaV3_3G046840
CsaV3_3G046870
CsaV3_3G046920
CsaV3_3G046980
CsaV3_3G047080
CsaV3_3G047210
CsaV3_3G047390
CsaV3_3G047510
CsaV3_3G047990
CsaV3_3G048000
CsaV3_3G048030
CsaV3_3G048110
CsaV3_3G048270
CsaV3_3G048410
CsaV3_3G048560
CsaV3_3G049080
CsaV3_3G049310
CsaV3_3G049630
CsaV3_3G049670
CsaV3_3G049970
CsaV3_4G000150
CsaV3_4G000390
CsaV3_4G000620
CsaV3_4G000630
CsaV3_4G000760
CsaV3_4G000860
CsaV3_4G000960
CsaV3_4G001230
CsaV3_4G001280
CsaV3_4G001330
CsaV3_4G001720
CsaV3_4G001730
CsaV3_4G001840
CsaV3_4G001990
CsaV3_4G003190
CsaV3_4G003480
CsaV3_4G003710
CsaV3_4G004050
CsaV3_4G004440
CsaV3_4G004510
CsaV3_4G004630
CsaV3_4G004790
CsaV3_4G004900
CsaV3_4G004920
CsaV3_4G004930
CsaV3_4G004980
CsaV3_4G005050
CsaV3_4G005080
CsaV3_4G005100
CsaV3_4G005170
CsaV3_4G005200
CsaV3_4G005210
CsaV3_4G005230
CsaV3_4G005320
CsaV3_4G005550
CsaV3_4G005710
CsaV3_4G005770
CsaV3_4G005820
CsaV3_4G006180
CsaV3_4G006200
CsaV3_4G006320
CsaV3_4G006330
CsaV3_4G006400
CsaV3_4G006540
CsaV3_4G006760
CsaV3_4G006860
CsaV3_4G007060
CsaV3_4G007380
CsaV3_4G008010
CsaV3_4G008050
CsaV3_4G008100
CsaV3_4G008310
CsaV3_4G008390
CsaV3_4G008470
CsaV3_4G008510
CsaV3_4G008530
CsaV3_4G008750
CsaV3_4G008840
CsaV3_4G009010
CsaV3_4G009080
CsaV3_4G009130
CsaV3_4G009200
CsaV3_4G009460
CsaV3_4G009780
CsaV3_4G009940
CsaV3_4G010090
CsaV3_4G010280
CsaV3_4G010540
CsaV3_4G010560
CsaV3_4G011730
CsaV3_4G012030
CsaV3_4G012080
CsaV3_4G012090
CsaV3_4G012170
CsaV3_4G013230
CsaV3_4G013310
CsaV3_4G013560
CsaV3_4G014580
CsaV3_4G016050
CsaV3_4G017350
CsaV3_4G017620
CsaV3_4G023230
CsaV3_4G023300
CsaV3_4G023480
CsaV3_4G023550
CsaV3_4G023710
CsaV3_4G023750
CsaV3_4G023760
CsaV3_4G023770
CsaV3_4G023990
CsaV3_4G024110
CsaV3_4G024160
CsaV3_4G024460
CsaV3_4G024620
CsaV3_4G024770
CsaV3_4G024800
CsaV3_4G024850
CsaV3_4G025320
CsaV3_4G025480
CsaV3_4G025630
CsaV3_4G025940
CsaV3_4G025970
CsaV3_4G025990
CsaV3_4G026080
CsaV3_4G026240
CsaV3_4G026340
CsaV3_4G026470
CsaV3_4G027040
CsaV3_4G027160
CsaV3_4G027190
CsaV3_4G027390
CsaV3_4G027680
CsaV3_4G027740
CsaV3_4G027750
CsaV3_4G028050
CsaV3_4G028930
CsaV3_4G029050
CsaV3_4G029150
CsaV3_4G029170
CsaV3_4G029210
CsaV3_4G029340
CsaV3_4G029510
CsaV3_4G029670
CsaV3_4G029820
CsaV3_4G029830
CsaV3_4G029850
CsaV3_4G030410
CsaV3_4G030480
CsaV3_4G030970
CsaV3_4G031170
CsaV3_4G031190
CsaV3_4G031280
CsaV3_4G031320
CsaV3_4G031480
CsaV3_4G031600
CsaV3_4G031880
CsaV3_4G031930
CsaV3_4G032560
CsaV3_4G032610
CsaV3_4G032700
CsaV3_4G032730
CsaV3_4G032770
CsaV3_4G032830
CsaV3_4G033090
CsaV3_4G033130
CsaV3_4G033150
CsaV3_4G033250
CsaV3_4G033280
CsaV3_4G033340
CsaV3_4G033390
CsaV3_4G033460
CsaV3_4G033510
CsaV3_4G033630
CsaV3_4G033650
CsaV3_4G033840
CsaV3_4G034020
CsaV3_4G034030
CsaV3_4G034070
CsaV3_4G034350
CsaV3_4G035290
CsaV3_4G035330
CsaV3_4G035650
CsaV3_4G035750
CsaV3_4G035870
CsaV3_4G036010
CsaV3_4G036180
CsaV3_4G036380
CsaV3_4G036550
CsaV3_4G036560
CsaV3_4G036700
CsaV3_4G036810
CsaV3_4G036850
CsaV3_4G037180
CsaV3_4G037390
CsaV3_4G037400
CsaV3_4G037480
CsaV3_4G037600
CsaV3_4G037630
CsaV3_4G037900
CsaV3_5G000150
CsaV3_5G000280
CsaV3_5G000290
CsaV3_5G000340
CsaV3_5G000860
CsaV3_5G000870
CsaV3_5G000930
CsaV3_5G001080
CsaV3_5G001370
CsaV3_5G001490
CsaV3_5G001530
CsaV3_5G001810
CsaV3_5G001840
CsaV3_5G002000
CsaV3_5G002210
CsaV3_5G002470
CsaV3_5G002480
CsaV3_5G002590
CsaV3_5G002750
CsaV3_5G002770
CsaV3_5G002810
CsaV3_5G002970
CsaV3_5G002990
CsaV3_5G003000
CsaV3_5G003030
CsaV3_5G003340
CsaV3_5G003450
CsaV3_5G003460
CsaV3_5G003470
CsaV3_5G003680
CsaV3_5G003710
CsaV3_5G003770
CsaV3_5G003870
CsaV3_5G003900
CsaV3_5G003970
CsaV3_5G003980
CsaV3_5G004330
CsaV3_5G004430
CsaV3_5G004470
CsaV3_5G004840
CsaV3_5G004980
CsaV3_5G005270
CsaV3_5G005350
CsaV3_5G005520
CsaV3_5G005640
CsaV3_5G006110
CsaV3_5G006240
CsaV3_5G006380
CsaV3_5G006570
CsaV3_5G006580
CsaV3_5G006630
CsaV3_5G006650
CsaV3_5G006910
CsaV3_5G007980
CsaV3_5G008120
CsaV3_5G008130
CsaV3_5G008190
CsaV3_5G008330
CsaV3_5G008400
CsaV3_5G008430
CsaV3_5G008450
CsaV3_5G008610
CsaV3_5G008620
CsaV3_5G008630
CsaV3_5G008660
CsaV3_5G008790
CsaV3_5G008840
CsaV3_5G008890
CsaV3_5G008950
CsaV3_5G008960
CsaV3_5G010190
CsaV3_5G010540
CsaV3_5G010750
CsaV3_5G010900
CsaV3_5G010920
CsaV3_5G010990
CsaV3_5G011010
CsaV3_5G011190
CsaV3_5G012340
CsaV3_5G013150
CsaV3_5G013320
CsaV3_5G013380
CsaV3_5G013580
CsaV3_5G013700
CsaV3_5G013870
CsaV3_5G013990
CsaV3_5G014080
CsaV3_5G014100
CsaV3_5G014110
CsaV3_5G014250
CsaV3_5G014270
CsaV3_5G014540
CsaV3_5G014550
CsaV3_5G014710
CsaV3_5G014970
CsaV3_5G015030
CsaV3_5G015140
CsaV3_5G015440
CsaV3_5G015740
CsaV3_5G017320
CsaV3_5G018620
CsaV3_5G020020
CsaV3_5G020040
CsaV3_5G020350
CsaV3_5G020470
CsaV3_5G020800
CsaV3_5G020810
CsaV3_5G021810
CsaV3_5G021890
CsaV3_5G023030
CsaV3_5G023110
CsaV3_5G023140
CsaV3_5G023250
CsaV3_5G023280
CsaV3_5G023520
CsaV3_5G023610
CsaV3_5G023750
CsaV3_5G023920
CsaV3_5G024020
CsaV3_5G024060
CsaV3_5G024110
CsaV3_5G024170
CsaV3_5G024310
CsaV3_5G024410
CsaV3_5G024510
CsaV3_5G024580
CsaV3_5G024990
CsaV3_5G025150
CsaV3_5G025450
CsaV3_5G026060
CsaV3_5G026100
CsaV3_5G026140
CsaV3_5G026230
CsaV3_5G026410
CsaV3_5G026430
CsaV3_5G026610
CsaV3_5G026730
CsaV3_5G027060
CsaV3_5G027240
CsaV3_5G027380
CsaV3_5G027630
CsaV3_5G028070
CsaV3_5G028160
CsaV3_5G028280
CsaV3_5G028530
CsaV3_5G028650
CsaV3_5G028660
CsaV3_5G029020
CsaV3_5G029220
CsaV3_5G029270
CsaV3_5G029340
CsaV3_5G029520
CsaV3_5G029560
CsaV3_5G029660
CsaV3_5G029840
CsaV3_5G029950
CsaV3_5G030060
CsaV3_5G030120
CsaV3_5G030360
CsaV3_5G030760
CsaV3_5G030980
CsaV3_5G031240
CsaV3_5G031290
CsaV3_5G031360
CsaV3_5G031490
CsaV3_5G031630
CsaV3_5G032370
CsaV3_5G032490
CsaV3_5G032510
CsaV3_5G032850
CsaV3_5G032860
CsaV3_5G032980
CsaV3_5G033060
CsaV3_5G033110
CsaV3_5G033200
CsaV3_5G033250
CsaV3_5G033580
CsaV3_5G033680
CsaV3_5G034210
CsaV3_5G034290
CsaV3_5G034330
CsaV3_5G034480
CsaV3_5G034810
CsaV3_5G035160
CsaV3_5G035220
CsaV3_5G035230
CsaV3_5G035370
CsaV3_5G035410
CsaV3_5G035530
CsaV3_5G035770
CsaV3_5G035870
CsaV3_5G036220
CsaV3_5G036390
CsaV3_5G036430
CsaV3_5G036470
CsaV3_5G036480
CsaV3_5G036520
CsaV3_5G036560
CsaV3_5G036630
CsaV3_5G036690
CsaV3_5G036760
CsaV3_5G036810
CsaV3_5G037950
CsaV3_5G037990
CsaV3_5G038050
CsaV3_5G038060
CsaV3_5G038230
CsaV3_5G038340
CsaV3_5G038350
CsaV3_5G038790
CsaV3_5G038940
CsaV3_5G039180
CsaV3_5G039270
CsaV3_5G039440
CsaV3_5G039450
CsaV3_5G039500
CsaV3_5G039570
CsaV3_5G039850
CsaV3_5G040400
CsaV3_5G040560
CsaV3_6G000170
CsaV3_6G000600
CsaV3_6G000900
CsaV3_6G000920
CsaV3_6G001080
CsaV3_6G001110
CsaV3_6G001130
CsaV3_6G001230
CsaV3_6G001310
CsaV3_6G001380
CsaV3_6G001400
CsaV3_6G001430
CsaV3_6G001560
CsaV3_6G001570
CsaV3_6G001600
CsaV3_6G001710
CsaV3_6G001720
CsaV3_6G001800
CsaV3_6G001830
CsaV3_6G001890
CsaV3_6G001930
CsaV3_6G002170
CsaV3_6G002180
CsaV3_6G002200
CsaV3_6G002240
CsaV3_6G002280
CsaV3_6G002550
CsaV3_6G002870
CsaV3_6G003070
CsaV3_6G003190
CsaV3_6G003690
CsaV3_6G003880
CsaV3_6G003980
CsaV3_6G004090
CsaV3_6G004200
CsaV3_6G004480
CsaV3_6G004490
CsaV3_6G004650
CsaV3_6G005110
CsaV3_6G005350
CsaV3_6G005370
CsaV3_6G005450
CsaV3_6G005510
CsaV3_6G005660
CsaV3_6G005860
CsaV3_6G006170
CsaV3_6G006180
CsaV3_6G006280
CsaV3_6G006290
CsaV3_6G006310
CsaV3_6G006390
CsaV3_6G006630
CsaV3_6G006830
CsaV3_6G006840
CsaV3_6G006930
CsaV3_6G007160
CsaV3_6G007280
CsaV3_6G007420
CsaV3_6G007470
CsaV3_6G007490
CsaV3_6G007500
CsaV3_6G007580
CsaV3_6G007600
CsaV3_6G007940
CsaV3_6G007960
CsaV3_6G008170
CsaV3_6G008260
CsaV3_6G008390
CsaV3_6G008680
CsaV3_6G009130
CsaV3_6G009230
CsaV3_6G009270
CsaV3_6G009410
CsaV3_6G009940
CsaV3_6G012590
CsaV3_6G012820
CsaV3_6G012830
CsaV3_6G013010
CsaV3_6G013080
CsaV3_6G013090
CsaV3_6G013140
CsaV3_6G013510
CsaV3_6G013800
CsaV3_6G013850
CsaV3_6G013860
CsaV3_6G013980
CsaV3_6G014300
CsaV3_6G014400
CsaV3_6G014430
CsaV3_6G014560
CsaV3_6G014610
CsaV3_6G014670
CsaV3_6G014810
CsaV3_6G014880
CsaV3_6G014940
CsaV3_6G014960
CsaV3_6G015190
CsaV3_6G015220
CsaV3_6G015540
CsaV3_6G015750
CsaV3_6G015810
CsaV3_6G015920
CsaV3_6G016130
CsaV3_6G016180
CsaV3_6G016530
CsaV3_6G016780
CsaV3_6G017000
CsaV3_6G017050
CsaV3_6G017090
CsaV3_6G017110
CsaV3_6G018550
CsaV3_6G018740
CsaV3_6G021320
CsaV3_6G021730
CsaV3_6G021880
CsaV3_6G022000
CsaV3_6G022340
CsaV3_6G022540
CsaV3_6G022720
CsaV3_6G028440
CsaV3_6G028480
CsaV3_6G028610
CsaV3_6G029650
CsaV3_6G029660
CsaV3_6G030770
CsaV3_6G030940
CsaV3_6G030980
CsaV3_6G031200
CsaV3_6G031310
CsaV3_6G031500
CsaV3_6G031530
CsaV3_6G031720
CsaV3_6G031940
CsaV3_6G031970
CsaV3_6G031980
CsaV3_6G032180
CsaV3_6G032190
CsaV3_6G032270
CsaV3_6G033610
CsaV3_6G033660
CsaV3_6G033960
CsaV3_6G034210
CsaV3_6G034270
CsaV3_6G034290
CsaV3_6G034310
CsaV3_6G034480
CsaV3_6G035550
CsaV3_6G035790
CsaV3_6G035880
CsaV3_6G036030
CsaV3_6G036160
CsaV3_6G036180
CsaV3_6G036520
CsaV3_6G036560
CsaV3_6G036790
CsaV3_6G037190
CsaV3_6G037270
CsaV3_6G037280
CsaV3_6G037290
CsaV3_6G037390
CsaV3_6G037400
CsaV3_6G037470
CsaV3_6G037550
CsaV3_6G037710
CsaV3_6G037800
CsaV3_6G038150
CsaV3_6G038220
CsaV3_6G038320
CsaV3_6G038850
CsaV3_6G038930
CsaV3_6G039060
CsaV3_6G039070
CsaV3_6G039380
CsaV3_6G039550
CsaV3_6G040000
CsaV3_6G040430
CsaV3_6G040670
CsaV3_6G040690
CsaV3_6G040700
CsaV3_6G040780
CsaV3_6G040940
CsaV3_6G040960
CsaV3_6G041210
CsaV3_6G041580
CsaV3_6G041590
CsaV3_6G041830
CsaV3_6G041940
CsaV3_6G042080
CsaV3_6G042130
CsaV3_6G042140
CsaV3_6G042170
CsaV3_6G042240
CsaV3_6G042260
CsaV3_6G042440
CsaV3_6G042520
CsaV3_6G042860
CsaV3_6G043500
CsaV3_6G043910
CsaV3_6G043980
CsaV3_6G044070
CsaV3_6G044150
CsaV3_6G044180
CsaV3_6G044690
CsaV3_6G044740
CsaV3_6G044860
CsaV3_6G045040
CsaV3_6G045150
CsaV3_6G045280
CsaV3_6G045300
CsaV3_6G045340
CsaV3_6G045360
CsaV3_6G045370
CsaV3_6G045410
CsaV3_6G045450
CsaV3_6G045560
CsaV3_6G045680
CsaV3_6G046250
CsaV3_6G046560
CsaV3_6G046760
CsaV3_6G046910
CsaV3_6G047340
CsaV3_6G047410
CsaV3_6G047460
CsaV3_6G047490
CsaV3_6G047530
CsaV3_6G047950
CsaV3_6G047990
CsaV3_6G048110
CsaV3_6G048740
CsaV3_6G048760
CsaV3_6G048800
CsaV3_6G049180
CsaV3_6G049200
CsaV3_6G049400
CsaV3_6G049490
CsaV3_6G049770
CsaV3_6G049850
CsaV3_6G050050
CsaV3_6G050140
CsaV3_6G050170
CsaV3_6G050190
CsaV3_6G050380
CsaV3_6G050460
CsaV3_6G050790
CsaV3_6G050830
CsaV3_6G051310
CsaV3_6G051400
CsaV3_6G051450
CsaV3_6G051520
CsaV3_6G051630
CsaV3_6G051660
CsaV3_6G051670
CsaV3_6G051860
CsaV3_6G051870
CsaV3_6G051880
CsaV3_6G052190
CsaV3_6G052220
CsaV3_6G052290
CsaV3_6G052330
CsaV3_6G052360
CsaV3_6G052390
CsaV3_6G052520
CsaV3_6G052680
CsaV3_6G052910
CsaV3_6G052960
CsaV3_6G053140
CsaV3_6G053180
CsaV3_7G000130
CsaV3_7G000210
CsaV3_7G000630
CsaV3_7G000640
CsaV3_7G000680
CsaV3_7G000690
CsaV3_7G000720
CsaV3_7G000760
CsaV3_7G000980
CsaV3_7G001000
CsaV3_7G001970
CsaV3_7G002310
CsaV3_7G002320
CsaV3_7G002340
CsaV3_7G002410
CsaV3_7G002460
CsaV3_7G002600
CsaV3_7G003000
CsaV3_7G003180
CsaV3_7G003260
CsaV3_7G003280
CsaV3_7G003330
CsaV3_7G003430
CsaV3_7G003590
CsaV3_7G003640
CsaV3_7G003660
CsaV3_7G003670
CsaV3_7G003790
CsaV3_7G003800
CsaV3_7G004000
CsaV3_7G004470
CsaV3_7G005510
CsaV3_7G005980
CsaV3_7G006190
CsaV3_7G006330
CsaV3_7G006350
CsaV3_7G006540
CsaV3_7G006760
CsaV3_7G007010
CsaV3_7G007190
CsaV3_7G007260
CsaV3_7G007450
CsaV3_7G007800
CsaV3_7G007820
CsaV3_7G007870
CsaV3_7G007910
CsaV3_7G007920
CsaV3_7G008040
CsaV3_7G008120
CsaV3_7G008860
CsaV3_7G016200
CsaV3_7G018560
CsaV3_7G018640
CsaV3_7G018710
CsaV3_7G018730
CsaV3_7G019960
CsaV3_7G021060
CsaV3_7G021110
CsaV3_7G021140
CsaV3_7G021290
CsaV3_7G021300
CsaV3_7G021500
CsaV3_7G021740
CsaV3_7G021780
CsaV3_7G021850
CsaV3_7G021860
CsaV3_7G022520
CsaV3_7G022640
CsaV3_7G022910
CsaV3_7G022970
CsaV3_7G022980
CsaV3_7G023020
CsaV3_7G023430
CsaV3_7G023460
CsaV3_7G023480
CsaV3_7G023520
CsaV3_7G023770
CsaV3_7G024030
CsaV3_7G024080
CsaV3_7G024180
CsaV3_7G024480
CsaV3_7G024960
CsaV3_7G024980
CsaV3_7G025160
CsaV3_7G025320
CsaV3_7G025500
CsaV3_7G025980
CsaV3_7G026050
CsaV3_7G026150
CsaV3_7G026290
CsaV3_7G026370
CsaV3_7G026400
CsaV3_7G026600
CsaV3_7G026880
CsaV3_7G026900
CsaV3_7G026980
CsaV3_7G027310
CsaV3_7G027360
CsaV3_7G028080
CsaV3_7G028140
CsaV3_7G028270
CsaV3_7G028280
CsaV3_7G028390
CsaV3_7G028400
CsaV3_7G029050
CsaV3_7G029060
CsaV3_7G029090
CsaV3_7G029150
CsaV3_7G029220
CsaV3_7G029290
CsaV3_7G029300
CsaV3_7G029820
CsaV3_7G029870
CsaV3_7G029940
CsaV3_7G030050
CsaV3_7G030200
CsaV3_7G030290
CsaV3_7G030340
CsaV3_7G030600
CsaV3_7G030740
CsaV3_7G030930
CsaV3_7G030940
CsaV3_7G031110
CsaV3_7G031130
CsaV3_7G031220
CsaV3_7G031310
CsaV3_7G031350
CsaV3_7G031450
CsaV3_7G032580
CsaV3_7G033010
CsaV3_7G033050
CsaV3_7G033130
CsaV3_7G033230
CsaV3_7G033300
CsaV3_7G033310
CsaV3_7G033410
CsaV3_7G033620
CsaV3_7G033670
CsaV3_7G033760
CsaV3_7G033770
CsaV3_7G033810
CsaV3_7G034300
CsaV3_7G034670
CsaV3_7G034720
CsaV3_7G034790
CsaV3_7G034980
CsaV3_7G035100
CsaV3_7G035430
CsaV3_UNG001020
CsaV3_UNG004080
CsaV3_UNG052430
CsaV3_UNG061480
CsaV3_UNG073590
CsaV3_UNG111840
CsaV3_UNG147160
CsaV3_UNG155160
CsaV3_UNG196490
CsaV3_UNG207750
CsaV3_UNG207790
CsaV3_UNG208450
CsaV3_UNG208680
CsaV3_UNG209290
CsaV3_UNG209380
CsaV3_UNG209440
CsaV3_UNG209490
CsaV3_UNG209520
CsaV3_UNG209540
CsaV3_UNG209620
CsaV3_UNG209630
CsaV3_UNG209720
CsaV3_UNG209780
CsaV3_UNG224720
CsaV3_UNG227810
CsaV3_UNG227820
CsaV3_UNG232200
CsaV3_UNG232240
CsaV3_UNG236460

## Sheet: MEpaleTurquoise_DEG45
CsaV3_1G001330
CsaV3_1G030110
CsaV3_1G033480
CsaV3_1G038410
CsaV3_1G044410
CsaV3_1G045310
CsaV3_1G046450
CsaV3_2G002550
CsaV3_2G007120
CsaV3_2G024790
CsaV3_2G027960
CsaV3_3G000790
CsaV3_3G007810
CsaV3_3G019050
CsaV3_3G019090
CsaV3_3G032150
CsaV3_3G045440
CsaV3_3G048880
CsaV3_4G002030
CsaV3_4G010180
CsaV3_4G026960
CsaV3_4G028340
CsaV3_4G031250
CsaV3_4G031910
CsaV3_4G034630
CsaV3_5G001440
CsaV3_5G007970
CsaV3_5G008440
CsaV3_5G026370
CsaV3_5G032090
CsaV3_5G034900
CsaV3_5G036550
CsaV3_5G036820
CsaV3_5G039280
CsaV3_6G007830
CsaV3_6G013830
CsaV3_6G031230
CsaV3_6G048220
CsaV3_6G048630
CsaV3_7G007950
CsaV3_7G008260
CsaV3_7G021880
CsaV3_UNG115880
CsaV3_UNG115890
CsaV3_UNG186440

[truncated: 24 more sheets: MEtan_DEGs 528, MEcyan_433 DEGs, MEGrey60_181, METurquoise_3296, MElightyellow(384), MEred(1483), MeSaddleBrown(83), MEWhite (156), MEMagenta(701), MEblue (2149), MEyellow(1615), MEOrange(184), MEskyBlue_123, MESalmon (516), MEMidnightblue (464), MElightcyan_(445), MEbrown (2133), MEdarkgreen, MElightgreen(407), MEpurple, 621 …]
