# Supplementary material for: Transcriptomic and Physiological Analyses Reveal Potential Genes Involved in Photoperiod-Regulated β-Carotene Accumulation Mechanisms in the Endocarp of Cucumber (Cucumis sativus L.) Fruit
Source: Int J Mol Sci. 2022 Oct 21;23(20):12650. doi: 10.3390/ijms232012650 (PMC9604348; doi:10.3390/ijms232012650)
Supplement: Supplementary file 1 [file ijms-23-12650-s001.zip › Supplementary Datasheet S8_GO enrichments DEGs within specific WGCNA modules.xlsx]

## Sheet: MEBlack_ GO Enrichment 
Category	GOID	Description	GeneRatio	BgRatio	pvalue	padj	geneID	geneName	Count
BP	GO:0005992	trehalose biosynthetic process	4/334	14/6278	0.0051466	0.705257	CsaV3_1G001640/CsaV3_4G004750/CsaV3_5G031700/CsaV3_UNG213460	CsaV3_1G001640/CsaV3_4G004750/CsaV3_5G031700/CsaV3_UNG213460	4
BP	GO:0005991	trehalose metabolic process	4/334	15/6278	0.00672804	0.705257	CsaV3_1G001640/CsaV3_4G004750/CsaV3_5G031700/CsaV3_UNG213460	CsaV3_1G001640/CsaV3_4G004750/CsaV3_5G031700/CsaV3_UNG213460	4
BP	GO:0046351	disaccharide biosynthetic process	4/334	16/6278	0.00860069	0.705257	CsaV3_1G001640/CsaV3_4G004750/CsaV3_5G031700/CsaV3_UNG213460	CsaV3_1G001640/CsaV3_4G004750/CsaV3_5G031700/CsaV3_UNG213460	4
BP	GO:0009312	oligosaccharide biosynthetic process	4/334	19/6278	0.0161504	0.993247	CsaV3_1G001640/CsaV3_4G004750/CsaV3_5G031700/CsaV3_UNG213460	CsaV3_1G001640/CsaV3_4G004750/CsaV3_5G031700/CsaV3_UNG213460	4
BP	GO:0005984	disaccharide metabolic process	4/334	23/6278	0.031234	1	CsaV3_1G001640/CsaV3_4G004750/CsaV3_5G031700/CsaV3_UNG213460	CsaV3_1G001640/CsaV3_4G004750/CsaV3_5G031700/CsaV3_UNG213460	4
BP	GO:0009311	oligosaccharide metabolic process	4/334	26/6278	0.0465819	1	CsaV3_1G001640/CsaV3_4G004750/CsaV3_5G031700/CsaV3_UNG213460	CsaV3_1G001640/CsaV3_4G004750/CsaV3_5G031700/CsaV3_UNG213460	4
BP	GO:0009733	response to auxin	5/334	40/6278	0.0591227	1	CsaV3_1G013410/CsaV3_2G015520/CsaV3_6G013600/CsaV3_7G000620/CsaV3_7G022810	CsaV3_1G013410/CsaV3_2G015520/CsaV3_6G013600/CsaV3_7G000620/CsaV3_7G022810	5
BP	GO:0055085	transmembrane transport	29/334	409/6278	0.0665262	1	CsaV3_1G000720/CsaV3_1G002050/CsaV3_1G010220/CsaV3_1G017190/CsaV3_1G037390/CsaV3_1G039520/CsaV3_1G039850/CsaV3_2G021090/CsaV3_2G030270/CsaV3_2G033710/CsaV3_3G000160/CsaV3_3G000190/CsaV3_3G013440/CsaV3_3G013450/CsaV3_3G021900/CsaV3_4G002080/CsaV3_4G004100/CsaV3_4G006280/CsaV3_4G024790/CsaV3_4G030460/CsaV3_5G003620/CsaV3_5G006040/CsaV3_5G024690/CsaV3_5G035920/CsaV3_6G002230/CsaV3_6G014000/CsaV3_6G0…	CsaV3_1G000720/CsaV3_1G002050/CsaV3_1G010220/CsaV3_1G017190/CsaV3_1G037390/CsaV3_1G039520/CsaV3_1G039850/CsaV3_2G021090/CsaV3_2G030270/CsaV3_2G033710/CsaV3_3G000160/CsaV3_3G000190/CsaV3_3G013440/CsaV3_3G013450/CsaV3_3G021900/CsaV3_4G002080/CsaV3_4G004100/CsaV3_4G006280/CsaV3_4G024790/CsaV3_4G030460/CsaV3_5G003620/CsaV3_5G006040/CsaV3_5G024690/CsaV3_5G035920/CsaV3_6G002230/CsaV3_6G014000/CsaV3_6G0…	29
BP	GO:0005975	carbohydrate metabolic process	31/334	446/6278	0.0729674	1	CsaV3_1G001640/CsaV3_1G009520/CsaV3_1G011350/CsaV3_1G031170/CsaV3_1G040000/CsaV3_2G001890/CsaV3_3G004100/CsaV3_3G008480/CsaV3_3G032100/CsaV3_3G040580/CsaV3_4G004750/CsaV3_4G029540/CsaV3_4G031240/CsaV3_5G000220/CsaV3_5G000810/CsaV3_5G011220/CsaV3_5G025300/CsaV3_5G030780/CsaV3_5G031700/CsaV3_5G032400/CsaV3_5G033390/CsaV3_5G039830/CsaV3_6G005730/CsaV3_6G015090/CsaV3_6G022480/CsaV3_6G036420/CsaV3_6G0…	CsaV3_1G001640/CsaV3_1G009520/CsaV3_1G011350/CsaV3_1G031170/CsaV3_1G040000/CsaV3_2G001890/CsaV3_3G004100/CsaV3_3G008480/CsaV3_3G032100/CsaV3_3G040580/CsaV3_4G004750/CsaV3_4G029540/CsaV3_4G031240/CsaV3_5G000220/CsaV3_5G000810/CsaV3_5G011220/CsaV3_5G025300/CsaV3_5G030780/CsaV3_5G031700/CsaV3_5G032400/CsaV3_5G033390/CsaV3_5G039830/CsaV3_6G005730/CsaV3_6G015090/CsaV3_6G022480/CsaV3_6G036420/CsaV3_6G0…	31
BP	GO:0045229	external encapsulating structure organization	6/334	57/6278	0.0807311	1	CsaV3_1G041370/CsaV3_2G028840/CsaV3_3G009850/CsaV3_3G009870/CsaV3_7G024770/CsaV3_7G030240	CsaV3_1G041370/CsaV3_2G028840/CsaV3_3G009850/CsaV3_3G009870/CsaV3_7G024770/CsaV3_7G030240	6
BP	GO:0071555	cell wall organization	6/334	57/6278	0.0807311	1	CsaV3_1G041370/CsaV3_2G028840/CsaV3_3G009850/CsaV3_3G009870/CsaV3_7G024770/CsaV3_7G030240	CsaV3_1G041370/CsaV3_2G028840/CsaV3_3G009850/CsaV3_3G009870/CsaV3_7G024770/CsaV3_7G030240	6
BP	GO:0042545	cell wall modification	5/334	46/6278	0.0955831	1	CsaV3_1G041370/CsaV3_2G028840/CsaV3_3G009850/CsaV3_3G009870/CsaV3_7G030240	CsaV3_1G041370/CsaV3_2G028840/CsaV3_3G009850/CsaV3_3G009870/CsaV3_7G030240	5
BP	GO:0006081	cellular aldehyde metabolic process	2/334	1599368	0.131062	1	CsaV3_1G009520/CsaV3_6G013840	CsaV3_1G009520/CsaV3_6G013840	2
BP	GO:0009607	response to biotic stimulus	5/334	51/6278	0.132897	1	CsaV3_2G036440/CsaV3_3G021380/CsaV3_5G014560/CsaV3_5G014570/CsaV3_5G014940	CsaV3_2G036440/CsaV3_3G021380/CsaV3_5G014560/CsaV3_5G014570/CsaV3_5G014940	5
BP	GO:0044262	cellular carbohydrate metabolic process	8/334	96/6278	0.137491	1	CsaV3_1G001640/CsaV3_1G009520/CsaV3_1G040000/CsaV3_4G004750/CsaV3_5G031700/CsaV3_6G038030/CsaV3_6G038040/CsaV3_UNG213460	CsaV3_1G001640/CsaV3_1G009520/CsaV3_1G040000/CsaV3_4G004750/CsaV3_5G031700/CsaV3_6G038030/CsaV3_6G038040/CsaV3_UNG213460	8
BP	GO:0071554	cell wall organization or biogenesis	6/334	69/6278	0.159461	1	CsaV3_1G041370/CsaV3_2G028840/CsaV3_3G009850/CsaV3_3G009870/CsaV3_7G024770/CsaV3_7G030240	CsaV3_1G041370/CsaV3_2G028840/CsaV3_3G009850/CsaV3_3G009870/CsaV3_7G024770/CsaV3_7G030240	6
BP	GO:0009719	response to endogenous stimulus	5/334	55/6278	0.166745	1	CsaV3_1G013410/CsaV3_2G015520/CsaV3_6G013600/CsaV3_7G000620/CsaV3_7G022810	CsaV3_1G013410/CsaV3_2G015520/CsaV3_6G013600/CsaV3_7G000620/CsaV3_7G022810	5
BP	GO:0009725	response to hormone	5/334	55/6278	0.166745	1	CsaV3_1G013410/CsaV3_2G015520/CsaV3_6G013600/CsaV3_7G000620/CsaV3_7G022810	CsaV3_1G013410/CsaV3_2G015520/CsaV3_6G013600/CsaV3_7G000620/CsaV3_7G022810	5
BP	GO:0010033	response to organic substance	5/334	55/6278	0.166745	1	CsaV3_1G013410/CsaV3_2G015520/CsaV3_6G013600/CsaV3_7G000620/CsaV3_7G022810	CsaV3_1G013410/CsaV3_2G015520/CsaV3_6G013600/CsaV3_7G000620/CsaV3_7G022810	5
BP	GO:0006979	response to oxidative stress	7/334	88/6278	0.186614	1	CsaV3_2G016300/CsaV3_2G034090/CsaV3_2G034100/CsaV3_3G035690/CsaV3_5G033660/CsaV3_6G005630/CsaV3_7G028610	CsaV3_2G016300/CsaV3_2G034090/CsaV3_2G034100/CsaV3_3G035690/CsaV3_5G033660/CsaV3_6G005630/CsaV3_7G028610	7
BP	GO:0006766	vitamin metabolic process	2/334	15/6278	0.188261	1	CsaV3_6G013840/CsaV3_6G036910	CsaV3_6G013840/CsaV3_6G036910	2
BP	GO:0006767	water-soluble vitamin metabolic process	2/334	15/6278	0.188261	1	CsaV3_6G013840/CsaV3_6G036910	CsaV3_6G013840/CsaV3_6G036910	2
BP	GO:0009110	vitamin biosynthetic process	2/334	15/6278	0.188261	1	CsaV3_6G013840/CsaV3_6G036910	CsaV3_6G013840/CsaV3_6G036910	2
BP	GO:0042364	water-soluble vitamin biosynthetic process	2/334	15/6278	0.188261	1	CsaV3_6G013840/CsaV3_6G036910	CsaV3_6G013840/CsaV3_6G036910	2
BP	GO:0071804	cellular potassium ion transport	2/334	15/6278	0.188261	1	CsaV3_1G010220/CsaV3_4G002080	CsaV3_1G010220/CsaV3_4G002080	2
BP	GO:0071805	potassium ion transmembrane transport	2/334	15/6278	0.188261	1	CsaV3_1G010220/CsaV3_4G002080	CsaV3_1G010220/CsaV3_4G002080	2
BP	GO:0016567	protein ubiquitination	4/334	43/6278	0.193552	1	CsaV3_1G001800/CsaV3_5G004830/CsaV3_5G013610/CsaV3_6G001940	CsaV3_1G001800/CsaV3_5G004830/CsaV3_5G013610/CsaV3_6G001940	4
BP	GO:0032446	protein modification by small protein conjugation	4/334	44/6278	0.20467	1	CsaV3_1G001800/CsaV3_5G004830/CsaV3_5G013610/CsaV3_6G001940	CsaV3_1G001800/CsaV3_5G004830/CsaV3_5G013610/CsaV3_6G001940	4
BP	GO:0051704	multi-organism process	4/334	44/6278	0.20467	1	CsaV3_1G011530/CsaV3_1G011610/CsaV3_6G006950/CsaV3_6G006980	CsaV3_1G011530/CsaV3_1G011610/CsaV3_6G006950/CsaV3_6G006980	4
BP	GO:0006813	potassium ion transport	2/334	17/6278	0.227991	1	CsaV3_1G010220/CsaV3_4G002080	CsaV3_1G010220/CsaV3_4G002080	2
BP	GO:0098656	anion transmembrane transport	2/334	17/6278	0.227991	1	CsaV3_1G000720/CsaV3_1G037390	CsaV3_1G000720/CsaV3_1G037390	2
BP	GO:1901615	organic hydroxy compound metabolic process	2/334	17/6278	0.227991	1	CsaV3_1G040000/CsaV3_6G013840	CsaV3_1G040000/CsaV3_6G013840	2
BP	GO:1903825	organic acid transmembrane transport	2/334	17/6278	0.227991	1	CsaV3_1G000720/CsaV3_1G037390	CsaV3_1G000720/CsaV3_1G037390	2
BP	GO:1905039	carboxylic acid transmembrane transport	2/334	17/6278	0.227991	1	CsaV3_1G000720/CsaV3_1G037390	CsaV3_1G000720/CsaV3_1G037390	2
BP	GO:0044282	small molecule catabolic process	2/334	18/6278	0.248079	1	CsaV3_1G040000/CsaV3_2G034560	CsaV3_1G040000/CsaV3_2G034560	2
BP	GO:0006952	defense response	5/334	67/6278	0.283924	1	CsaV3_2G036440/CsaV3_3G021380/CsaV3_5G014560/CsaV3_5G014570/CsaV3_5G014940	CsaV3_2G036440/CsaV3_3G021380/CsaV3_5G014560/CsaV3_5G014570/CsaV3_5G014940	5
BP	GO:0042221	response to chemical	7/334	107/6278	0.342539	1	CsaV3_1G013410/CsaV3_1G039850/CsaV3_2G015520/CsaV3_5G003620/CsaV3_6G013600/CsaV3_7G000620/CsaV3_7G022810	CsaV3_1G013410/CsaV3_1G039850/CsaV3_2G015520/CsaV3_5G003620/CsaV3_6G013600/CsaV3_7G000620/CsaV3_7G022810	7
BP	GO:0006812	cation transport	12/334	197/6278	0.356154	1	CsaV3_1G010220/CsaV3_1G017190/CsaV3_1G039520/CsaV3_2G010060/CsaV3_3G017680/CsaV3_3G021900/CsaV3_4G002080/CsaV3_4G006280/CsaV3_4G024790/CsaV3_5G024690/CsaV3_5G034960/CsaV3_6G008070	CsaV3_1G010220/CsaV3_1G017190/CsaV3_1G039520/CsaV3_2G010060/CsaV3_3G017680/CsaV3_3G021900/CsaV3_4G002080/CsaV3_4G006280/CsaV3_4G024790/CsaV3_5G024690/CsaV3_5G034960/CsaV3_6G008070	12
BP	GO:0000160	phosphorelay signal transduction system	3/334	40/6278	0.358901	1	CsaV3_3G023600/CsaV3_5G036740/CsaV3_6G008270	CsaV3_3G023600/CsaV3_5G036740/CsaV3_6G008270	3
BP	GO:0016052	carbohydrate catabolic process	3/334	40/6278	0.358901	1	CsaV3_1G040000/CsaV3_3G004100/CsaV3_6G005730	CsaV3_1G040000/CsaV3_3G004100/CsaV3_6G005730	3
BP	GO:0006950	response to stress	17/334	289/6278	0.368947	1	CsaV3_1G003370/CsaV3_1G038350/CsaV3_1G038400/CsaV3_1G038540/CsaV3_2G016300/CsaV3_2G034090/CsaV3_2G034100/CsaV3_2G036440/CsaV3_3G021380/CsaV3_3G035690/CsaV3_5G013360/CsaV3_5G014560/CsaV3_5G014570/CsaV3_5G014940/CsaV3_5G033660/CsaV3_6G005630/CsaV3_7G028610	CsaV3_1G003370/CsaV3_1G038350/CsaV3_1G038400/CsaV3_1G038540/CsaV3_2G016300/CsaV3_2G034090/CsaV3_2G034100/CsaV3_2G036440/CsaV3_3G021380/CsaV3_3G035690/CsaV3_5G013360/CsaV3_5G014560/CsaV3_5G014570/CsaV3_5G014940/CsaV3_5G033660/CsaV3_6G005630/CsaV3_7G028610	17
BP	GO:0034637	cellular carbohydrate biosynthetic process	4/334	61/6278	0.40922	1	CsaV3_1G001640/CsaV3_4G004750/CsaV3_5G031700/CsaV3_UNG213460	CsaV3_1G001640/CsaV3_4G004750/CsaV3_5G031700/CsaV3_UNG213460	4
BP	GO:0006811	ion transport	16/334	280/6278	0.420589	1	CsaV3_1G000720/CsaV3_1G010220/CsaV3_1G017190/CsaV3_1G037390/CsaV3_1G039520/CsaV3_2G010060/CsaV3_3G017680/CsaV3_3G021900/CsaV3_4G002080/CsaV3_4G006280/CsaV3_4G024790/CsaV3_5G024690/CsaV3_5G026240/CsaV3_5G034960/CsaV3_6G008070/CsaV3_6G014000	CsaV3_1G000720/CsaV3_1G010220/CsaV3_1G017190/CsaV3_1G037390/CsaV3_1G039520/CsaV3_2G010060/CsaV3_3G017680/CsaV3_3G021900/CsaV3_4G002080/CsaV3_4G006280/CsaV3_4G024790/CsaV3_5G024690/CsaV3_5G026240/CsaV3_5G034960/CsaV3_6G008070/CsaV3_6G014000	16
BP	GO:0006308	DNA catabolic process	1/334	1599307	0.421372	1	CsaV3_1G011850	CsaV3_1G011850	1
BP	GO:0006541	glutamine metabolic process	1/334	1599307	0.421372	1	CsaV3_4G033040	CsaV3_4G033040	1
BP	GO:0006325	chromatin organization	2/334	28/6278	0.443526	1	CsaV3_3G000040/CsaV3_3G043700	CsaV3_3G000040/CsaV3_3G043700	2
BP	GO:0070647	protein modification by small protein conjugation or removal	4/334	64/6278	0.445521	1	CsaV3_1G001800/CsaV3_5G004830/CsaV3_5G013610/CsaV3_6G001940	CsaV3_1G001800/CsaV3_5G004830/CsaV3_5G013610/CsaV3_6G001940	4
BP	GO:0009664	plant-type cell wall organization	1/334	1599338	0.452205	1	CsaV3_7G024770	CsaV3_7G024770	1
BP	GO:0016042	lipid catabolic process	1/334	1599338	0.452205	1	CsaV3_2G034560	CsaV3_2G034560	1
BP	GO:0018205	peptidyl-lysine modification	1/334	1599338	0.452205	1	CsaV3_3G000040	CsaV3_3G000040	1
BP	GO:0033865	nucleoside bisphosphate metabolic process	1/334	1599338	0.452205	1	CsaV3_6G009990	CsaV3_6G009990	1
BP	GO:0033875	ribonucleoside bisphosphate metabolic process	1/334	1599338	0.452205	1	CsaV3_6G009990	CsaV3_6G009990	1
BP	GO:0034032	purine nucleoside bisphosphate metabolic process	1/334	1599338	0.452205	1	CsaV3_6G009990	CsaV3_6G009990	1
BP	GO:0042398	cellular modified amino acid biosynthetic process	1/334	1599338	0.452205	1	CsaV3_6G036910	CsaV3_6G036910	1
BP	GO:0050790	regulation of catalytic activity	1/334	1599338	0.452205	1	CsaV3_6G009080	CsaV3_6G009080	1
BP	GO:0071669	plant-type cell wall organization or biogenesis	1/334	1599338	0.452205	1	CsaV3_7G024770	CsaV3_7G024770	1
BP	GO:0015711	organic anion transport	2/334	30/6278	0.479494	1	CsaV3_1G000720/CsaV3_1G037390	CsaV3_1G000720/CsaV3_1G037390	2
BP	GO:0015849	organic acid transport	2/334	30/6278	0.479494	1	CsaV3_1G000720/CsaV3_1G037390	CsaV3_1G000720/CsaV3_1G037390	2
BP	GO:0046942	carboxylic acid transport	2/334	30/6278	0.479494	1	CsaV3_1G000720/CsaV3_1G037390	CsaV3_1G000720/CsaV3_1G037390	2
BP	GO:0006334	nucleosome assembly	1/334	1599368	0.481399	1	CsaV3_3G043700	CsaV3_3G043700	1
BP	GO:0006357	regulation of transcription by RNA polymerase II	1/334	1599368	0.481399	1	CsaV3_3G000870	CsaV3_3G000870	1
BP	GO:0009247	glycolipid biosynthetic process	1/334	1599368	0.481399	1	CsaV3_2G003280	CsaV3_2G003280	1
BP	GO:0016054	organic acid catabolic process	1/334	1599368	0.481399	1	CsaV3_2G034560	CsaV3_2G034560	1
BP	GO:0016569	covalent chromatin modification	1/334	1599368	0.481399	1	CsaV3_3G000040	CsaV3_3G000040	1
BP	GO:0016570	histone modification	1/334	1599368	0.481399	1	CsaV3_3G000040	CsaV3_3G000040	1
BP	GO:0031497	chromatin assembly	1/334	1599368	0.481399	1	CsaV3_3G043700	CsaV3_3G043700	1
BP	GO:0034728	nucleosome organization	1/334	1599368	0.481399	1	CsaV3_3G043700	CsaV3_3G043700	1
BP	GO:0046395	carboxylic acid catabolic process	1/334	1599368	0.481399	1	CsaV3_2G034560	CsaV3_2G034560	1
BP	GO:0046467	membrane lipid biosynthetic process	1/334	1599368	0.481399	1	CsaV3_2G003280	CsaV3_2G003280	1
BP	GO:0016051	carbohydrate biosynthetic process	4/334	68/6278	0.492786	1	CsaV3_1G001640/CsaV3_4G004750/CsaV3_5G031700/CsaV3_UNG213460	CsaV3_1G001640/CsaV3_4G004750/CsaV3_5G031700/CsaV3_UNG213460	4
BP	GO:0006066	alcohol metabolic process	1/334	13/6278	0.509043	1	CsaV3_1G040000	CsaV3_1G040000	1
BP	GO:0006323	DNA packaging	1/334	13/6278	0.509043	1	CsaV3_3G043700	CsaV3_3G043700	1
BP	GO:0019751	polyol metabolic process	1/334	13/6278	0.509043	1	CsaV3_1G040000	CsaV3_1G040000	1
BP	GO:0032268	regulation of cellular protein metabolic process	1/334	13/6278	0.509043	1	CsaV3_6G009080	CsaV3_6G009080	1
BP	GO:0065004	protein-DNA complex assembly	1/334	13/6278	0.509043	1	CsaV3_3G043700	CsaV3_3G043700	1
BP	GO:0071824	protein-DNA complex subunit organization	1/334	13/6278	0.509043	1	CsaV3_3G043700	CsaV3_3G043700	1
BP	GO:0003333	amino acid transmembrane transport	1/334	14/6278	0.535217	1	CsaV3_1G037390	CsaV3_1G037390	1
BP	GO:0006333	chromatin assembly or disassembly	1/334	14/6278	0.535217	1	CsaV3_3G043700	CsaV3_3G043700	1
BP	GO:0006575	cellular modified amino acid metabolic process	1/334	14/6278	0.535217	1	CsaV3_6G036910	CsaV3_6G036910	1
BP	GO:0006576	cellular biogenic amine metabolic process	1/334	14/6278	0.535217	1	CsaV3_2G007090	CsaV3_2G007090	1
BP	GO:0006664	glycolipid metabolic process	1/334	14/6278	0.535217	1	CsaV3_2G003280	CsaV3_2G003280	1
BP	GO:0006865	amino acid transport	1/334	14/6278	0.535217	1	CsaV3_1G037390	CsaV3_1G037390	1
BP	GO:0007186	G-protein coupled receptor signaling pathway	1/334	14/6278	0.535217	1	CsaV3_3G005860	CsaV3_3G005860	1
BP	GO:0044106	cellular amine metabolic process	1/334	14/6278	0.535217	1	CsaV3_2G007090	CsaV3_2G007090	1
BP	GO:0065009	regulation of molecular function	1/334	14/6278	0.535217	1	CsaV3_6G009080	CsaV3_6G009080	1
BP	GO:1903509	liposaccharide metabolic process	1/334	14/6278	0.535217	1	CsaV3_2G003280	CsaV3_2G003280	1
BP	GO:0008037	cell recognition	2/334	34/6278	0.546975	1	CsaV3_1G011530/CsaV3_1G011610	CsaV3_1G011530/CsaV3_1G011610	2
BP	GO:0009856	pollination	2/334	34/6278	0.546975	1	CsaV3_1G011530/CsaV3_1G011610	CsaV3_1G011530/CsaV3_1G011610	2
BP	GO:0009875	pollen-pistil interaction	2/334	34/6278	0.546975	1	CsaV3_1G011530/CsaV3_1G011610	CsaV3_1G011530/CsaV3_1G011610	2
BP	GO:0044706	multi-multicellular organism process	2/334	34/6278	0.546975	1	CsaV3_1G011530/CsaV3_1G011610	CsaV3_1G011530/CsaV3_1G011610	2
BP	GO:0048544	recognition of pollen	2/334	34/6278	0.546975	1	CsaV3_1G011530/CsaV3_1G011610	CsaV3_1G011530/CsaV3_1G011610	2
BP	GO:0008272	sulfate transport	1/334	15/6278	0.559999	1	CsaV3_5G026240	CsaV3_5G026240	1
BP	GO:0009064	glutamine family amino acid metabolic process	1/334	15/6278	0.559999	1	CsaV3_4G033040	CsaV3_4G033040	1
BP	GO:0051246	regulation of protein metabolic process	1/334	15/6278	0.559999	1	CsaV3_6G009080	CsaV3_6G009080	1
BP	GO:0072348	sulfur compound transport	1/334	15/6278	0.559999	1	CsaV3_5G026240	CsaV3_5G026240	1
BP	GO:0005976	polysaccharide metabolic process	4/334	74/6278	0.560272	1	CsaV3_3G004100/CsaV3_6G005730/CsaV3_6G038030/CsaV3_6G038040	CsaV3_3G004100/CsaV3_6G005730/CsaV3_6G038030/CsaV3_6G038040	4
BP	GO:0015672	monovalent inorganic cation transport	3/334	55/6278	0.566774	1	CsaV3_1G010220/CsaV3_1G017190/CsaV3_4G002080	CsaV3_1G010220/CsaV3_1G017190/CsaV3_4G002080	3
BP	GO:0000003	reproduction	2/334	36/6278	0.578352	1	CsaV3_1G011530/CsaV3_1G011610	CsaV3_1G011530/CsaV3_1G011610	2
BP	GO:0022414	reproductive process	2/334	36/6278	0.578352	1	CsaV3_1G011530/CsaV3_1G011610	CsaV3_1G011530/CsaV3_1G011610	2
BP	GO:0030001	metal ion transport	6/334	115/6278	0.579531	1	CsaV3_1G010220/CsaV3_1G017190/CsaV3_3G017680/CsaV3_4G002080/CsaV3_5G034960/CsaV3_6G008070	CsaV3_1G010220/CsaV3_1G017190/CsaV3_3G017680/CsaV3_4G002080/CsaV3_5G034960/CsaV3_6G008070	6
BP	GO:0034220	ion transmembrane transport	4/334	76/6278	0.58167	1	CsaV3_1G000720/CsaV3_1G010220/CsaV3_1G037390/CsaV3_4G002080	CsaV3_1G000720/CsaV3_1G010220/CsaV3_1G037390/CsaV3_4G002080	4
BP	GO:0006413	translational initiation	1/334	17/6278	0.605681	1	CsaV3_2G012490	CsaV3_2G012490	1
BP	GO:0030258	lipid modification	1/334	17/6278	0.605681	1	CsaV3_2G034560	CsaV3_2G034560	1
BP	GO:0006820	anion transport	3/334	61/6278	0.637683	1	CsaV3_1G000720/CsaV3_1G037390/CsaV3_5G026240	CsaV3_1G000720/CsaV3_1G037390/CsaV3_5G026240	3
BP	GO:0007154	cell communication	11/334	222/6278	0.641513	1	CsaV3_1G011530/CsaV3_1G011610/CsaV3_1G033260/CsaV3_2G005290/CsaV3_2G034570/CsaV3_3G005860/CsaV3_3G023600/CsaV3_5G036740/CsaV3_6G008270/CsaV3_6G040010/CsaV3_UNG049340	CsaV3_1G011530/CsaV3_1G011610/CsaV3_1G033260/CsaV3_2G005290/CsaV3_2G034570/CsaV3_3G005860/CsaV3_3G023600/CsaV3_5G036740/CsaV3_6G008270/CsaV3_6G040010/CsaV3_UNG049340	11
BP	GO:0016043	cellular component organization	9/334	183/6278	0.645338	1	CsaV3_1G041370/CsaV3_2G028840/CsaV3_3G000040/CsaV3_3G009850/CsaV3_3G009870/CsaV3_3G038180/CsaV3_3G043700/CsaV3_7G024770/CsaV3_7G030240	CsaV3_1G041370/CsaV3_2G028840/CsaV3_3G000040/CsaV3_3G009850/CsaV3_3G009870/CsaV3_3G038180/CsaV3_3G043700/CsaV3_7G024770/CsaV3_7G030240	9
BP	GO:0006643	membrane lipid metabolic process	1/334	19/6278	0.646633	1	CsaV3_2G003280	CsaV3_2G003280	1
BP	GO:0051726	regulation of cell cycle	1/334	19/6278	0.646633	1	CsaV3_6G009080	CsaV3_6G009080	1
BP	GO:0007165	signal transduction	9/334	184/6278	0.651804	1	CsaV3_1G033260/CsaV3_2G005290/CsaV3_2G034570/CsaV3_3G005860/CsaV3_3G023600/CsaV3_5G036740/CsaV3_6G008270/CsaV3_6G040010/CsaV3_UNG049340	CsaV3_1G033260/CsaV3_2G005290/CsaV3_2G034570/CsaV3_3G005860/CsaV3_3G023600/CsaV3_5G036740/CsaV3_6G008270/CsaV3_6G040010/CsaV3_UNG049340	9
BP	GO:0023052	signaling	9/334	184/6278	0.651804	1	CsaV3_1G033260/CsaV3_2G005290/CsaV3_2G034570/CsaV3_3G005860/CsaV3_3G023600/CsaV3_5G036740/CsaV3_6G008270/CsaV3_6G040010/CsaV3_UNG049340	CsaV3_1G033260/CsaV3_2G005290/CsaV3_2G034570/CsaV3_3G005860/CsaV3_3G023600/CsaV3_5G036740/CsaV3_6G008270/CsaV3_6G040010/CsaV3_UNG049340	9
BP	GO:0071103	DNA conformation change	1/334	21/6278	0.683343	1	CsaV3_3G043700	CsaV3_3G043700	1
BP	GO:0006855	drug transmembrane transport	2/334	44/6278	0.687742	1	CsaV3_1G039850/CsaV3_5G003620	CsaV3_1G039850/CsaV3_5G003620	2
BP	GO:0015893	drug transport	2/334	44/6278	0.687742	1	CsaV3_1G039850/CsaV3_5G003620	CsaV3_1G039850/CsaV3_5G003620	2
BP	GO:0042493	response to drug	2/334	44/6278	0.687742	1	CsaV3_1G039850/CsaV3_5G003620	CsaV3_1G039850/CsaV3_5G003620	2
BP	GO:0032787	monocarboxylic acid metabolic process	4/334	88/6278	0.696577	1	CsaV3_1G009520/CsaV3_2G034560/CsaV3_5G006620/CsaV3_6G036910	CsaV3_1G009520/CsaV3_2G034560/CsaV3_5G006620/CsaV3_6G036910	4
BP	GO:0051276	chromosome organization	2/334	45/6278	0.699643	1	CsaV3_3G000040/CsaV3_3G043700	CsaV3_3G000040/CsaV3_3G043700	2
BP	GO:0006732	coenzyme metabolic process	3/334	67/6278	0.700091	1	CsaV3_6G009990/CsaV3_6G013840/CsaV3_6G036910	CsaV3_6G009990/CsaV3_6G013840/CsaV3_6G036910	3
BP	GO:0006352	DNA-templated transcription, initiation	1/334	22/6278	0.700246	1	CsaV3_6G039830	CsaV3_6G039830	1
BP	GO:0035556	intracellular signal transduction	5/334	110/6278	0.704065	1	CsaV3_2G034570/CsaV3_3G023600/CsaV3_5G036740/CsaV3_6G008270/CsaV3_UNG049340	CsaV3_2G034570/CsaV3_3G023600/CsaV3_5G036740/CsaV3_6G008270/CsaV3_UNG049340	5
BP	GO:0065003	protein-containing complex assembly	2/334	46/6278	0.711167	1	CsaV3_3G038180/CsaV3_3G043700	CsaV3_3G038180/CsaV3_3G043700	2
BP	GO:0006366	transcription by RNA polymerase II	1/334	23/6278	0.71625	1	CsaV3_3G000870	CsaV3_3G000870	1
BP	GO:0006928	movement of cell or subcellular component	2/334	48/6278	0.733106	1	CsaV3_1G038470/CsaV3_3G022850	CsaV3_1G038470/CsaV3_3G022850	2
BP	GO:0007018	microtubule-based movement	2/334	48/6278	0.733106	1	CsaV3_1G038470/CsaV3_3G022850	CsaV3_1G038470/CsaV3_3G022850	2
BP	GO:0006631	fatty acid metabolic process	2/334	50/6278	0.753614	1	CsaV3_2G034560/CsaV3_5G006620	CsaV3_2G034560/CsaV3_5G006620	2
BP	GO:0015698	inorganic anion transport	1/334	27/6278	0.772184	1	CsaV3_5G026240	CsaV3_5G026240	1
BP	GO:0009057	macromolecule catabolic process	3/334	76/6278	0.777901	1	CsaV3_1G011850/CsaV3_3G004100/CsaV3_6G005730	CsaV3_1G011850/CsaV3_3G004100/CsaV3_6G005730	3
BP	GO:0009308	amine metabolic process	1/334	28/6278	0.784357	1	CsaV3_2G007090	CsaV3_2G007090	1
BP	GO:0043933	protein-containing complex subunit organization	2/334	54/6278	0.790585	1	CsaV3_3G038180/CsaV3_3G043700	CsaV3_3G038180/CsaV3_3G043700	2
BP	GO:0032501	multicellular organismal process	2/334	55/6278	0.79903	1	CsaV3_1G011530/CsaV3_1G011610	CsaV3_1G011530/CsaV3_1G011610	2
BP	GO:0006887	exocytosis	1/334	30/6278	0.806791	1	CsaV3_3G035190	CsaV3_3G035190	1
BP	GO:0032940	secretion by cell	1/334	30/6278	0.806791	1	CsaV3_3G035190	CsaV3_3G035190	1
BP	GO:0046903	secretion	1/334	30/6278	0.806791	1	CsaV3_3G035190	CsaV3_3G035190	1
BP	GO:0009108	coenzyme biosynthetic process	2/334	56/6278	0.807174	1	CsaV3_6G013840/CsaV3_6G036910	CsaV3_6G013840/CsaV3_6G036910	2
BP	GO:0045454	cell redox homeostasis	3/334	81/6278	0.813471	1	CsaV3_4G027810/CsaV3_6G007950/CsaV3_6G017370	CsaV3_4G027810/CsaV3_6G007950/CsaV3_6G017370	3
BP	GO:0007049	cell cycle	1/334	31/6278	0.817119	1	CsaV3_6G009080	CsaV3_6G009080	1
BP	GO:0019725	cellular homeostasis	3/334	82/6278	0.819978	1	CsaV3_4G027810/CsaV3_6G007950/CsaV3_6G017370	CsaV3_4G027810/CsaV3_6G007950/CsaV3_6G017370	3
BP	GO:0098655	cation transmembrane transport	2/334	58/6278	0.822585	1	CsaV3_1G010220/CsaV3_4G002080	CsaV3_1G010220/CsaV3_4G002080	2
BP	GO:0098660	inorganic ion transmembrane transport	2/334	58/6278	0.822585	1	CsaV3_1G010220/CsaV3_4G002080	CsaV3_1G010220/CsaV3_4G002080	2
BP	GO:0098662	inorganic cation transmembrane transport	2/334	58/6278	0.822585	1	CsaV3_1G010220/CsaV3_4G002080	CsaV3_1G010220/CsaV3_4G002080	2
BP	GO:0042592	homeostatic process	3/334	83/6278	0.826292	1	CsaV3_4G027810/CsaV3_6G007950/CsaV3_6G017370	CsaV3_4G027810/CsaV3_6G007950/CsaV3_6G017370	3
BP	GO:0071840	cellular component organization or biogenesis	9/334	218/6278	0.828804	1	CsaV3_1G041370/CsaV3_2G028840/CsaV3_3G000040/CsaV3_3G009850/CsaV3_3G009870/CsaV3_3G038180/CsaV3_3G043700/CsaV3_7G024770/CsaV3_7G030240	CsaV3_1G041370/CsaV3_2G028840/CsaV3_3G000040/CsaV3_3G009850/CsaV3_3G009870/CsaV3_3G038180/CsaV3_3G043700/CsaV3_7G024770/CsaV3_7G030240	9
BP	GO:0007264	small GTPase mediated signal transduction	2/334	61/6278	0.843637	1	CsaV3_2G034570/CsaV3_UNG049340	CsaV3_2G034570/CsaV3_UNG049340	2
BP	GO:0019752	carboxylic acid metabolic process	9/334	222/6278	0.844098	1	CsaV3_1G009520/CsaV3_2G007090/CsaV3_2G034560/CsaV3_2G035120/CsaV3_4G004380/CsaV3_4G033040/CsaV3_5G006620/CsaV3_6G036910/CsaV3_UNG000020	CsaV3_1G009520/CsaV3_2G007090/CsaV3_2G034560/CsaV3_2G035120/CsaV3_4G004380/CsaV3_4G033040/CsaV3_5G006620/CsaV3_6G036910/CsaV3_UNG000020	9
BP	GO:0006633	fatty acid biosynthetic process	1/334	34/6278	0.844916	1	CsaV3_5G006620	CsaV3_5G006620	1
BP	GO:0018193	peptidyl-amino acid modification	1/334	35/6278	0.853212	1	CsaV3_3G000040	CsaV3_3G000040	1
BP	GO:1901575	organic substance catabolic process	5/334	136/6278	0.857483	1	CsaV3_1G011850/CsaV3_1G040000/CsaV3_2G034560/CsaV3_3G004100/CsaV3_6G005730	CsaV3_1G011850/CsaV3_1G040000/CsaV3_2G034560/CsaV3_3G004100/CsaV3_6G005730	5
BP	GO:0071705	nitrogen compound transport	5/334	137/6278	0.861748	1	CsaV3_1G037390/CsaV3_2G010060/CsaV3_3G007970/CsaV3_5G008320/CsaV3_5G023130	CsaV3_1G037390/CsaV3_2G010060/CsaV3_3G007970/CsaV3_5G008320/CsaV3_5G023130	5
BP	GO:0007017	microtubule-based process	2/334	64/6278	0.862401	1	CsaV3_1G038470/CsaV3_3G022850	CsaV3_1G038470/CsaV3_3G022850	2
BP	GO:0072525	pyridine-containing compound biosynthetic process	1/334	37/6278	0.868499	1	CsaV3_6G013840	CsaV3_6G013840	1
BP	GO:0043436	oxoacid metabolic process	9/334	230/6278	0.871463	1	CsaV3_1G009520/CsaV3_2G007090/CsaV3_2G034560/CsaV3_2G035120/CsaV3_4G004380/CsaV3_4G033040/CsaV3_5G006620/CsaV3_6G036910/CsaV3_UNG000020	CsaV3_1G009520/CsaV3_2G007090/CsaV3_2G034560/CsaV3_2G035120/CsaV3_4G004380/CsaV3_4G033040/CsaV3_5G006620/CsaV3_6G036910/CsaV3_UNG000020	9
BP	GO:0006073	cellular glucan metabolic process	2/334	66/6278	0.873743	1	CsaV3_6G038030/CsaV3_6G038040	CsaV3_6G038030/CsaV3_6G038040	2
BP	GO:0044042	glucan metabolic process	2/334	66/6278	0.873743	1	CsaV3_6G038030/CsaV3_6G038040	CsaV3_6G038030/CsaV3_6G038040	2
BP	GO:0044264	cellular polysaccharide metabolic process	2/334	66/6278	0.873743	1	CsaV3_6G038030/CsaV3_6G038040	CsaV3_6G038030/CsaV3_6G038040	2
BP	GO:0051188	cofactor biosynthetic process	2/334	66/6278	0.873743	1	CsaV3_6G013840/CsaV3_6G036910	CsaV3_6G013840/CsaV3_6G036910	2
BP	GO:0006082	organic acid metabolic process	9/334	231/6278	0.874594	1	CsaV3_1G009520/CsaV3_2G007090/CsaV3_2G034560/CsaV3_2G035120/CsaV3_4G004380/CsaV3_4G033040/CsaV3_5G006620/CsaV3_6G036910/CsaV3_UNG000020	CsaV3_1G009520/CsaV3_2G007090/CsaV3_2G034560/CsaV3_2G035120/CsaV3_4G004380/CsaV3_4G033040/CsaV3_5G006620/CsaV3_6G036910/CsaV3_UNG000020	9
BP	GO:0051186	cofactor metabolic process	3/334	92/6278	0.875045	1	CsaV3_6G009990/CsaV3_6G013840/CsaV3_6G036910	CsaV3_6G009990/CsaV3_6G013840/CsaV3_6G036910	3
BP	GO:0006486	protein glycosylation	1/334	38/6278	0.875537	1	CsaV3_3G027760	CsaV3_3G027760	1
BP	GO:0043413	macromolecule glycosylation	1/334	38/6278	0.875537	1	CsaV3_3G027760	CsaV3_3G027760	1
BP	GO:0009056	catabolic process	5/334	141/6278	0.877754	1	CsaV3_1G011850/CsaV3_1G040000/CsaV3_2G034560/CsaV3_3G004100/CsaV3_6G005730	CsaV3_1G011850/CsaV3_1G040000/CsaV3_2G034560/CsaV3_3G004100/CsaV3_6G005730	5
BP	GO:0009117	nucleotide metabolic process	3/334	95/6278	0.888379	1	CsaV3_1G016970/CsaV3_5G008870/CsaV3_6G009990	CsaV3_1G016970/CsaV3_5G008870/CsaV3_6G009990	3
BP	GO:0072330	monocarboxylic acid biosynthetic process	2/334	69/6278	0.889153	1	CsaV3_5G006620/CsaV3_6G036910	CsaV3_5G006620/CsaV3_6G036910	2
BP	GO:0006753	nucleoside phosphate metabolic process	3/334	96/6278	0.892533	1	CsaV3_1G016970/CsaV3_5G008870/CsaV3_6G009990	CsaV3_1G016970/CsaV3_5G008870/CsaV3_6G009990	3
BP	GO:0009165	nucleotide biosynthetic process	2/334	70/6278	0.89389	1	CsaV3_1G016970/CsaV3_5G008870	CsaV3_1G016970/CsaV3_5G008870	2
BP	GO:0022607	cellular component assembly	2/334	70/6278	0.89389	1	CsaV3_3G038180/CsaV3_3G043700	CsaV3_3G038180/CsaV3_3G043700	2
BP	GO:1901293	nucleoside phosphate biosynthetic process	2/334	70/6278	0.89389	1	CsaV3_1G016970/CsaV3_5G008870	CsaV3_1G016970/CsaV3_5G008870	2
BP	GO:0009100	glycoprotein metabolic process	1/334	41/6278	0.894475	1	CsaV3_3G027760	CsaV3_3G027760	1
BP	GO:0009101	glycoprotein biosynthetic process	1/334	41/6278	0.894475	1	CsaV3_3G027760	CsaV3_3G027760	1
BP	GO:0034622	cellular protein-containing complex assembly	1/334	41/6278	0.894475	1	CsaV3_3G043700	CsaV3_3G043700	1
BP	GO:0009150	purine ribonucleotide metabolic process	2/334	71/6278	0.898439	1	CsaV3_5G008870/CsaV3_6G009990	CsaV3_5G008870/CsaV3_6G009990	2
BP	GO:0009259	ribonucleotide metabolic process	2/334	71/6278	0.898439	1	CsaV3_5G008870/CsaV3_6G009990	CsaV3_5G008870/CsaV3_6G009990	2
BP	GO:0070085	glycosylation	1/334	42/6278	0.900126	1	CsaV3_3G027760	CsaV3_3G027760	1
BP	GO:0034655	nucleobase-containing compound catabolic process	1/334	43/6278	0.905475	1	CsaV3_1G011850	CsaV3_1G011850	1
BP	GO:0072524	pyridine-containing compound metabolic process	1/334	43/6278	0.905475	1	CsaV3_6G013840	CsaV3_6G013840	1
BP	GO:0044281	small molecule metabolic process	14/334	353/6278	0.905832	1	CsaV3_1G009520/CsaV3_1G016970/CsaV3_1G040000/CsaV3_2G007090/CsaV3_2G034560/CsaV3_2G035120/CsaV3_4G004380/CsaV3_4G033040/CsaV3_5G006620/CsaV3_5G008870/CsaV3_6G009990/CsaV3_6G013840/CsaV3_6G036910/CsaV3_UNG000020	CsaV3_1G009520/CsaV3_1G016970/CsaV3_1G040000/CsaV3_2G007090/CsaV3_2G034560/CsaV3_2G035120/CsaV3_4G004380/CsaV3_4G033040/CsaV3_5G006620/CsaV3_5G008870/CsaV3_6G009990/CsaV3_6G013840/CsaV3_6G036910/CsaV3_UNG000020	14
BP	GO:0006163	purine nucleotide metabolic process	2/334	73/6278	0.906997	1	CsaV3_5G008870/CsaV3_6G009990	CsaV3_5G008870/CsaV3_6G009990	2
BP	GO:0072521	purine-containing compound metabolic process	2/334	74/6278	0.91102	1	CsaV3_5G008870/CsaV3_6G009990	CsaV3_5G008870/CsaV3_6G009990	2
BP	GO:0090407	organophosphate biosynthetic process	3/334	101/6278	0.911297	1	CsaV3_1G016970/CsaV3_5G008870/CsaV3_6G013840	CsaV3_1G016970/CsaV3_5G008870/CsaV3_6G013840	3
BP	GO:0006629	lipid metabolic process	9/334	249/6278	0.921091	1	CsaV3_2G003280/CsaV3_2G017320/CsaV3_2G028100/CsaV3_2G034560/CsaV3_3G026730/CsaV3_4G034420/CsaV3_5G006620/CsaV3_5G035120/CsaV3_6G005740	CsaV3_2G003280/CsaV3_2G017320/CsaV3_2G028100/CsaV3_2G034560/CsaV3_3G026730/CsaV3_4G034420/CsaV3_5G006620/CsaV3_5G035120/CsaV3_6G005740	9
BP	GO:0051716	cellular response to stimulus	9/334	249/6278	0.921091	1	CsaV3_1G033260/CsaV3_2G005290/CsaV3_2G034570/CsaV3_3G005860/CsaV3_3G023600/CsaV3_5G036740/CsaV3_6G008270/CsaV3_6G040010/CsaV3_UNG049340	CsaV3_1G033260/CsaV3_2G005290/CsaV3_2G034570/CsaV3_3G005860/CsaV3_3G023600/CsaV3_5G036740/CsaV3_6G008270/CsaV3_6G040010/CsaV3_UNG049340	9
BP	GO:0019693	ribose phosphate metabolic process	2/334	77/6278	0.922132	1	CsaV3_5G008870/CsaV3_6G009990	CsaV3_5G008870/CsaV3_6G009990	2
BP	GO:0006886	intracellular protein transport	2/334	80/6278	0.93193	1	CsaV3_3G007970/CsaV3_5G008320	CsaV3_3G007970/CsaV3_5G008320	2
BP	GO:0009127	purine nucleoside monophosphate biosynthetic process	1/334	49/6278	0.932076	1	CsaV3_5G008870	CsaV3_5G008870	1
BP	GO:0009156	ribonucleoside monophosphate biosynthetic process	1/334	49/6278	0.932076	1	CsaV3_5G008870	CsaV3_5G008870	1
BP	GO:0009168	purine ribonucleoside monophosphate biosynthetic process	1/334	49/6278	0.932076	1	CsaV3_5G008870	CsaV3_5G008870	1
BP	GO:1901605	alpha-amino acid metabolic process	1/334	49/6278	0.932076	1	CsaV3_4G033040	CsaV3_4G033040	1
BP	GO:0065008	regulation of biological quality	3/334	109/6278	0.935221	1	CsaV3_4G027810/CsaV3_6G007950/CsaV3_6G017370	CsaV3_4G027810/CsaV3_6G007950/CsaV3_6G017370	3
BP	GO:0009124	nucleoside monophosphate biosynthetic process	1/334	50/6278	0.935718	1	CsaV3_5G008870	CsaV3_5G008870	1
BP	GO:0046700	heterocycle catabolic process	1/334	50/6278	0.935718	1	CsaV3_1G011850	CsaV3_1G011850	1
BP	GO:0006520	cellular amino acid metabolic process	3/334	110/6278	0.937753	1	CsaV3_4G004380/CsaV3_4G033040/CsaV3_UNG000020	CsaV3_4G004380/CsaV3_4G033040/CsaV3_UNG000020	3
BP	GO:0044270	cellular nitrogen compound catabolic process	1/334	51/6278	0.939166	1	CsaV3_1G011850	CsaV3_1G011850	1
BP	GO:1901361	organic cyclic compound catabolic process	1/334	51/6278	0.939166	1	CsaV3_1G011850	CsaV3_1G011850	1
BP	GO:0055086	nucleobase-containing small molecule metabolic process	3/334	111/6278	0.940194	1	CsaV3_1G016970/CsaV3_5G008870/CsaV3_6G009990	CsaV3_1G016970/CsaV3_5G008870/CsaV3_6G009990	3
BP	GO:1901137	carbohydrate derivative biosynthetic process	3/334	111/6278	0.940194	1	CsaV3_2G003280/CsaV3_3G027760/CsaV3_5G008870	CsaV3_2G003280/CsaV3_3G027760/CsaV3_5G008870	3
BP	GO:0019439	aromatic compound catabolic process	1/334	52/6278	0.942429	1	CsaV3_1G011850	CsaV3_1G011850	1
BP	GO:0006996	organelle organization	2/334	84/6278	0.943193	1	CsaV3_3G000040/CsaV3_3G043700	CsaV3_3G000040/CsaV3_3G043700	2
BP	GO:0009152	purine ribonucleotide biosynthetic process	1/334	54/6278	0.94844	1	CsaV3_5G008870	CsaV3_5G008870	1
BP	GO:0009260	ribonucleotide biosynthetic process	1/334	54/6278	0.94844	1	CsaV3_5G008870	CsaV3_5G008870	1
BP	GO:0046390	ribose phosphate biosynthetic process	1/334	54/6278	0.94844	1	CsaV3_5G008870	CsaV3_5G008870	1
BP	GO:0016192	vesicle-mediated transport	3/334	116/6278	0.951125	1	CsaV3_2G035110/CsaV3_3G035190/CsaV3_5G008320	CsaV3_2G035110/CsaV3_3G035190/CsaV3_5G008320	3
BP	GO:0006164	purine nucleotide biosynthetic process	1/334	56/6278	0.953826	1	CsaV3_5G008870	CsaV3_5G008870	1
BP	GO:0044265	cellular macromolecule catabolic process	1/334	56/6278	0.953826	1	CsaV3_1G011850	CsaV3_1G011850	1
BP	GO:0044283	small molecule biosynthetic process	4/334	145/6278	0.954715	1	CsaV3_2G007090/CsaV3_5G006620/CsaV3_6G013840/CsaV3_6G036910	CsaV3_2G007090/CsaV3_5G006620/CsaV3_6G013840/CsaV3_6G036910	4
BP	GO:0009126	purine nucleoside monophosphate metabolic process	1/334	57/6278	0.956305	1	CsaV3_5G008870	CsaV3_5G008870	1
BP	GO:0009161	ribonucleoside monophosphate metabolic process	1/334	57/6278	0.956305	1	CsaV3_5G008870	CsaV3_5G008870	1
BP	GO:0009167	purine ribonucleoside monophosphate metabolic process	1/334	57/6278	0.956305	1	CsaV3_5G008870	CsaV3_5G008870	1
BP	GO:0072522	purine-containing compound biosynthetic process	1/334	57/6278	0.956305	1	CsaV3_5G008870	CsaV3_5G008870	1
BP	GO:0016053	organic acid biosynthetic process	3/334	120/6278	0.958499	1	CsaV3_2G007090/CsaV3_5G006620/CsaV3_6G036910	CsaV3_2G007090/CsaV3_5G006620/CsaV3_6G036910	3
BP	GO:0046394	carboxylic acid biosynthetic process	3/334	120/6278	0.958499	1	CsaV3_2G007090/CsaV3_5G006620/CsaV3_6G036910	CsaV3_2G007090/CsaV3_5G006620/CsaV3_6G036910	3
BP	GO:0009123	nucleoside monophosphate metabolic process	1/334	58/6278	0.958651	1	CsaV3_5G008870	CsaV3_5G008870	1
BP	GO:0034613	cellular protein localization	2/334	91/6278	0.958773	1	CsaV3_3G007970/CsaV3_5G008320	CsaV3_3G007970/CsaV3_5G008320	2
BP	GO:0046907	intracellular transport	2/334	91/6278	0.958773	1	CsaV3_3G007970/CsaV3_5G008320	CsaV3_3G007970/CsaV3_5G008320	2
BP	GO:0051649	establishment of localization in cell	2/334	91/6278	0.958773	1	CsaV3_3G007970/CsaV3_5G008320	CsaV3_3G007970/CsaV3_5G008320	2
BP	GO:0070727	cellular macromolecule localization	2/334	91/6278	0.958773	1	CsaV3_3G007970/CsaV3_5G008320	CsaV3_3G007970/CsaV3_5G008320	2
BP	GO:0044248	cellular catabolic process	3/334	121/6278	0.960173	1	CsaV3_1G011850/CsaV3_1G040000/CsaV3_2G034560	CsaV3_1G011850/CsaV3_1G040000/CsaV3_2G034560	3
BP	GO:0071702	organic substance transport	4/334	150/6278	0.962501	1	CsaV3_1G000720/CsaV3_1G037390/CsaV3_3G007970/CsaV3_5G008320	CsaV3_1G000720/CsaV3_1G037390/CsaV3_3G007970/CsaV3_5G008320	4
BP	GO:0008610	lipid biosynthetic process	2/334	94/6278	0.964116	1	CsaV3_2G003280/CsaV3_5G006620	CsaV3_2G003280/CsaV3_5G006620	2
BP	GO:0006508	proteolysis	8/334	256/6278	0.96743	1	CsaV3_1G013570/CsaV3_2G025690/CsaV3_4G034650/CsaV3_4G035160/CsaV3_4G037590/CsaV3_5G031600/CsaV3_5G037560/CsaV3_7G002070	CsaV3_1G013570/CsaV3_2G025690/CsaV3_4G034650/CsaV3_4G035160/CsaV3_4G037590/CsaV3_5G031600/CsaV3_5G037560/CsaV3_7G002070	8
BP	GO:0019637	organophosphate metabolic process	4/334	155/6278	0.969033	1	CsaV3_1G016970/CsaV3_5G008870/CsaV3_6G009990/CsaV3_6G013840	CsaV3_1G016970/CsaV3_5G008870/CsaV3_6G009990/CsaV3_6G013840	4
BP	GO:0044255	cellular lipid metabolic process	3/334	128/6278	0.970232	1	CsaV3_2G003280/CsaV3_2G034560/CsaV3_5G006620	CsaV3_2G003280/CsaV3_2G034560/CsaV3_5G006620	3
BP	GO:0017144	drug metabolic process	2/334	100/6278	0.97288	1	CsaV3_2G007090/CsaV3_6G013840	CsaV3_2G007090/CsaV3_6G013840	2
BP	GO:1901135	carbohydrate derivative metabolic process	4/334	163/6278	0.977322	1	CsaV3_2G003280/CsaV3_3G027760/CsaV3_5G008870/CsaV3_6G009990	CsaV3_2G003280/CsaV3_3G027760/CsaV3_5G008870/CsaV3_6G009990	4
BP	GO:0044085	cellular component biogenesis	2/334	105/6278	0.978572	1	CsaV3_3G038180/CsaV3_3G043700	CsaV3_3G038180/CsaV3_3G043700	2
BP	GO:0015031	protein transport	2/334	110/6278	0.983101	1	CsaV3_3G007970/CsaV3_5G008320	CsaV3_3G007970/CsaV3_5G008320	2
BP	GO:0015833	peptide transport	2/334	110/6278	0.983101	1	CsaV3_3G007970/CsaV3_5G008320	CsaV3_3G007970/CsaV3_5G008320	2
BP	GO:0042886	amide transport	2/334	110/6278	0.983101	1	CsaV3_3G007970/CsaV3_5G008320	CsaV3_3G007970/CsaV3_5G008320	2
BP	GO:0051641	cellular localization	2/334	113/6278	0.985358	1	CsaV3_3G007970/CsaV3_5G008320	CsaV3_3G007970/CsaV3_5G008320	2
BP	GO:0045184	establishment of protein localization	2/334	115/6278	0.986697	1	CsaV3_3G007970/CsaV3_5G008320	CsaV3_3G007970/CsaV3_5G008320	2
BP	GO:0008104	protein localization	2/334	121/6278	0.990038	1	CsaV3_3G007970/CsaV3_5G008320	CsaV3_3G007970/CsaV3_5G008320	2
BP	GO:0033036	macromolecule localization	2/334	129/6278	0.993249	1	CsaV3_3G007970/CsaV3_5G008320	CsaV3_3G007970/CsaV3_5G008320	2
BP	GO:0006259	DNA metabolic process	1/334	126/6278	0.999051	1	CsaV3_1G011850	CsaV3_1G011850	1
BP	GO:0043604	amide biosynthetic process	2/334	286/6278	0.999998	1	CsaV3_2G012490/CsaV3_6G036910	CsaV3_2G012490/CsaV3_6G036910	2
BP	GO:0043603	cellular amide metabolic process	2/334	297/6278	0.999999	1	CsaV3_2G012490/CsaV3_6G036910	CsaV3_2G012490/CsaV3_6G036910	2
BP	GO:0006412	translation	1/334	271/6278	1	1	CsaV3_2G012490	CsaV3_2G012490	1
BP	GO:0043043	peptide biosynthetic process	1/334	274/6278	1	1	CsaV3_2G012490	CsaV3_2G012490	1
BP	GO:1901566	organonitrogen compound biosynthetic process	6/334	488/6278	1	1	CsaV3_2G007090/CsaV3_2G012490/CsaV3_3G027760/CsaV3_5G008870/CsaV3_6G013840/CsaV3_6G036910	CsaV3_2G007090/CsaV3_2G012490/CsaV3_3G027760/CsaV3_5G008870/CsaV3_6G013840/CsaV3_6G036910	6
BP	GO:0006518	peptide metabolic process	1/334	281/6278	1	1	CsaV3_2G012490	CsaV3_2G012490	1
BP	GO:0006364	rRNA processing	0/334	21/6278	1	1			0
BP	GO:0006396	RNA processing	0/334	115/6278	1	1			0
BP	GO:0009451	RNA modification	0/334	34/6278	1	1			0
BP	GO:0016072	rRNA metabolic process	0/334	21/6278	1	1			0
BP	GO:0022613	ribonucleoprotein complex biogenesis	0/334	36/6278	1	1			0
BP	GO:0032259	methylation	0/334	17/6278	1	1			0
BP	GO:0034470	ncRNA processing	0/334	48/6278	1	1			0
BP	GO:0034660	ncRNA metabolic process	0/334	86/6278	1	1			0
BP	GO:0042254	ribosome biogenesis	0/334	34/6278	1	1			0
BP	GO:0043414	macromolecule methylation	0/334	1599338	1	1			0
CC	GO:0005618	cell wall	35612	70/2213	0.0311817	0.717178	CsaV3_1G041370/CsaV3_2G028840/CsaV3_3G009850/CsaV3_3G009870/CsaV3_6G038030/CsaV3_6G038040/CsaV3_7G030240	CsaV3_1G041370/CsaV3_2G028840/CsaV3_3G009850/CsaV3_3G009870/CsaV3_6G038030/CsaV3_6G038040/CsaV3_7G030240	7
CC	GO:0030312	external encapsulating structure	35612	70/2213	0.0311817	0.717178	CsaV3_1G041370/CsaV3_2G028840/CsaV3_3G009850/CsaV3_3G009870/CsaV3_6G038030/CsaV3_6G038040/CsaV3_7G030240	CsaV3_1G041370/CsaV3_2G028840/CsaV3_3G009850/CsaV3_3G009870/CsaV3_6G038030/CsaV3_6G038040/CsaV3_7G030240	7
CC	GO:0005576	extracellular region	35551	47/2213	0.0521245	0.799242	CsaV3_5G037560/CsaV3_6G006950/CsaV3_6G006980/CsaV3_6G038030/CsaV3_6G038040	CsaV3_5G037560/CsaV3_6G006950/CsaV3_6G006980/CsaV3_6G038030/CsaV3_6G038040	5
CC	GO:0071944	cell periphery	35643	112/2213	0.113738	0.886489	CsaV3_1G041370/CsaV3_2G028840/CsaV3_3G009850/CsaV3_3G009870/CsaV3_3G035190/CsaV3_6G038030/CsaV3_6G038040/CsaV3_7G030240	CsaV3_1G041370/CsaV3_2G028840/CsaV3_3G009850/CsaV3_3G009870/CsaV3_3G035190/CsaV3_6G038030/CsaV3_6G038040/CsaV3_7G030240	8
CC	GO:0031966	mitochondrial membrane	35462	22/2213	0.250597	0.886489	CsaV3_1G000720/CsaV3_5G036210	CsaV3_1G000720/CsaV3_5G036210	2
CC	GO:0048046	apoplast	35462	23/2213	0.267167	0.886489	CsaV3_6G038030/CsaV3_6G038040	CsaV3_6G038030/CsaV3_6G038040	2
CC	GO:0005740	mitochondrial envelope	35462	25/2213	0.300278	0.886489	CsaV3_1G000720/CsaV3_5G036210	CsaV3_1G000720/CsaV3_5G036210	2
CC	GO:0000785	chromatin	35431	114596	0.36183	0.886489	CsaV3_3G043700	CsaV3_3G043700	1
CC	GO:0032993	protein-DNA complex	35431	114596	0.36183	0.886489	CsaV3_3G043700	CsaV3_3G043700	1
CC	GO:0044815	DNA packaging complex	35431	114596	0.36183	0.886489	CsaV3_3G043700	CsaV3_3G043700	1
CC	GO:0044429	mitochondrial part	35462	30/2213	0.381606	0.886489	CsaV3_1G000720/CsaV3_5G036210	CsaV3_1G000720/CsaV3_5G036210	2
CC	GO:0005654	nucleoplasm	35462	31/2213	0.397443	0.886489	CsaV3_2G031400/CsaV3_3G000870	CsaV3_2G031400/CsaV3_3G000870	2
CC	GO:0044451	nucleoplasm part	35462	31/2213	0.397443	0.886489	CsaV3_2G031400/CsaV3_3G000870	CsaV3_2G031400/CsaV3_3G000870	2
CC	GO:0005743	mitochondrial inner membrane	35431	114657	0.416803	0.886489	CsaV3_1G000720	CsaV3_1G000720	1
CC	GO:0005777	peroxisome	35431	114657	0.416803	0.886489	CsaV3_2G034560	CsaV3_2G034560	1
CC	GO:0016592	mediator complex	35431	114657	0.416803	0.886489	CsaV3_3G000870	CsaV3_3G000870	1
CC	GO:0042579	microbody	35431	114657	0.416803	0.886489	CsaV3_2G034560	CsaV3_2G034560	1
CC	GO:0019866	organelle inner membrane	35431	13/2213	0.442505	0.886489	CsaV3_1G000720	CsaV3_1G000720	1
CC	GO:0031967	organelle envelope	35462	34/2213	0.44379	0.886489	CsaV3_1G000720/CsaV3_5G036210	CsaV3_1G000720/CsaV3_5G036210	2
CC	GO:0031975	envelope	35462	34/2213	0.44379	0.886489	CsaV3_1G000720/CsaV3_5G036210	CsaV3_1G000720/CsaV3_5G036210	2
CC	GO:0005634	nucleus	17/97	374/2213	0.477007	0.886489	CsaV3_1G009120/CsaV3_1G009760/CsaV3_2G013210/CsaV3_2G031400/CsaV3_2G032150/CsaV3_3G000040/CsaV3_3G000870/CsaV3_3G023550/CsaV3_3G039870/CsaV3_3G043700/CsaV3_3G046370/CsaV3_4G011850/CsaV3_4G036880/CsaV3_5G040310/CsaV3_6G006010/CsaV3_6G006020/CsaV3_UNG146120	CsaV3_1G009120/CsaV3_1G009760/CsaV3_2G013210/CsaV3_2G031400/CsaV3_2G032150/CsaV3_3G000040/CsaV3_3G000870/CsaV3_3G023550/CsaV3_3G039870/CsaV3_3G043700/CsaV3_3G046370/CsaV3_4G011850/CsaV3_4G036880/CsaV3_5G040310/CsaV3_6G006010/CsaV3_6G006020/CsaV3_UNG146120	17
CC	GO:0005667	transcription factor complex	35431	16/2213	0.513074	0.886489	CsaV3_1G024370	CsaV3_1G024370	1
CC	GO:0031012	extracellular matrix	35431	20/2213	0.593589	0.886489	CsaV3_5G037560	CsaV3_5G037560	1
CC	GO:0044421	extracellular region part	35431	20/2213	0.593589	0.886489	CsaV3_5G037560	CsaV3_5G037560	1
CC	GO:0031981	nuclear lumen	35462	46/2213	0.607297	0.886489	CsaV3_2G031400/CsaV3_3G000870	CsaV3_2G031400/CsaV3_3G000870	2
CC	GO:0000145	exocyst	35431	22/2213	0.628754	0.886489	CsaV3_3G035190	CsaV3_3G035190	1
CC	GO:0005938	cell cortex	35431	22/2213	0.628754	0.886489	CsaV3_3G035190	CsaV3_3G035190	1
CC	GO:0044448	cell cortex part	35431	22/2213	0.628754	0.886489	CsaV3_3G035190	CsaV3_3G035190	1
CC	GO:0099568	cytoplasmic region	35431	22/2213	0.628754	0.886489	CsaV3_3G035190	CsaV3_3G035190	1
CC	GO:0044427	chromosomal part	35431	23/2213	0.64519	0.886489	CsaV3_3G043700	CsaV3_3G043700	1
CC	GO:0099023	tethering complex	35431	24/2213	0.660905	0.886489	CsaV3_3G035190	CsaV3_3G035190	1
CC	GO:0031090	organelle membrane	35462	52/2213	0.674502	0.886489	CsaV3_1G000720/CsaV3_5G036210	CsaV3_1G000720/CsaV3_5G036210	2
CC	GO:0031974	membrane-enclosed lumen	35462	52/2213	0.674502	0.886489	CsaV3_2G031400/CsaV3_3G000870	CsaV3_2G031400/CsaV3_3G000870	2
CC	GO:0043233	organelle lumen	35462	52/2213	0.674502	0.886489	CsaV3_2G031400/CsaV3_3G000870	CsaV3_2G031400/CsaV3_3G000870	2
CC	GO:0070013	intracellular organelle lumen	35462	52/2213	0.674502	0.886489	CsaV3_2G031400/CsaV3_3G000870	CsaV3_2G031400/CsaV3_3G000870	2
CC	GO:0005739	mitochondrion	35490	86/2213	0.738306	0.943391	CsaV3_1G000720/CsaV3_4G004910/CsaV3_5G036210	CsaV3_1G000720/CsaV3_4G004910/CsaV3_5G036210	3
CC	GO:0044428	nuclear part	35462	69/2213	0.815697	0.999988	CsaV3_2G031400/CsaV3_3G000870	CsaV3_2G031400/CsaV3_3G000870	2
CC	GO:1990234	transferase complex	35431	39/2213	0.828569	0.999988	CsaV3_2G031400	CsaV3_2G031400	1
CC	GO:0005694	chromosome	35431	44/2213	0.863579	0.999988	CsaV3_3G043700	CsaV3_3G043700	1
CC	GO:1902494	catalytic complex	35462	102/2213	0.945267	0.999988	CsaV3_2G031400/CsaV3_6G040010	CsaV3_2G031400/CsaV3_6G040010	2
CC	GO:0044422	organelle part	35551	202/2213	0.95162	0.999988	CsaV3_1G000720/CsaV3_2G031400/CsaV3_3G000870/CsaV3_3G043700/CsaV3_5G036210	CsaV3_1G000720/CsaV3_2G031400/CsaV3_3G000870/CsaV3_3G043700/CsaV3_5G036210	5
CC	GO:0044446	intracellular organelle part	35551	202/2213	0.95162	0.999988	CsaV3_1G000720/CsaV3_2G031400/CsaV3_3G000870/CsaV3_3G043700/CsaV3_5G036210	CsaV3_1G000720/CsaV3_2G031400/CsaV3_3G000870/CsaV3_3G043700/CsaV3_5G036210	5
CC	GO:0005737	cytoplasm	35643	497/2213	0.999958	0.999988	CsaV3_1G000720/CsaV3_1G040000/CsaV3_2G012490/CsaV3_2G034560/CsaV3_3G035190/CsaV3_4G004910/CsaV3_5G035120/CsaV3_5G036210	CsaV3_1G000720/CsaV3_1G040000/CsaV3_2G012490/CsaV3_2G034560/CsaV3_3G035190/CsaV3_4G004910/CsaV3_5G035120/CsaV3_5G036210	8
CC	GO:0043228	non-membrane-bounded organelle	35462	282/2213	0.999979	0.999988	CsaV3_3G043700/CsaV3_5G027160	CsaV3_3G043700/CsaV3_5G027160	2
CC	GO:0043232	intracellular non-membrane-bounded organelle	35462	282/2213	0.999979	0.999988	CsaV3_3G043700/CsaV3_5G027160	CsaV3_3G043700/CsaV3_5G027160	2
CC	GO:0044444	cytoplasmic part	35551	421/2213	0.999988	0.999988	CsaV3_1G000720/CsaV3_2G034560/CsaV3_3G035190/CsaV3_4G004910/CsaV3_5G036210	CsaV3_1G000720/CsaV3_2G034560/CsaV3_3G035190/CsaV3_4G004910/CsaV3_5G036210	5
MF	GO:0043565	sequence-specific DNA binding	18/474	188/9200	0.00818004	0.626965	CsaV3_1G037680/CsaV3_1G039550/CsaV3_2G004160/CsaV3_2G026630/CsaV3_2G029010/CsaV3_2G034030/CsaV3_3G026410/CsaV3_3G046530/CsaV3_4G003030/CsaV3_4G004890/CsaV3_4G008480/CsaV3_4G011850/CsaV3_5G033640/CsaV3_6G013820/CsaV3_6G046080/CsaV3_6G046850/CsaV3_6G048830/CsaV3_UNG183410	CsaV3_1G037680/CsaV3_1G039550/CsaV3_2G004160/CsaV3_2G026630/CsaV3_2G029010/CsaV3_2G034030/CsaV3_3G026410/CsaV3_3G046530/CsaV3_4G003030/CsaV3_4G004890/CsaV3_4G008480/CsaV3_4G011850/CsaV3_5G033640/CsaV3_6G013820/CsaV3_6G046080/CsaV3_6G046850/CsaV3_6G048830/CsaV3_UNG183410	18
MF	GO:0016160	amylase activity	3/474	2666577	0.0164453	0.626965	CsaV3_3G004100/CsaV3_5G032400/CsaV3_6G005730	CsaV3_3G004100/CsaV3_5G032400/CsaV3_6G005730	3
MF	GO:0015298	solute:cation antiporter activity	5/474	30/9200	0.0174108	0.626965	CsaV3_1G039520/CsaV3_3G021900/CsaV3_4G006280/CsaV3_4G024790/CsaV3_5G024690	CsaV3_1G039520/CsaV3_3G021900/CsaV3_4G006280/CsaV3_4G024790/CsaV3_5G024690	5
MF	GO:0015299	solute:proton antiporter activity	5/474	30/9200	0.0174108	0.626965	CsaV3_1G039520/CsaV3_3G021900/CsaV3_4G006280/CsaV3_4G024790/CsaV3_5G024690	CsaV3_1G039520/CsaV3_3G021900/CsaV3_4G006280/CsaV3_4G024790/CsaV3_5G024690	5
MF	GO:0033897	ribonuclease T2 activity	3/474	2666607	0.0211027	0.626965	CsaV3_3G035380/CsaV3_3G041400/CsaV3_5G032730	CsaV3_3G035380/CsaV3_3G041400/CsaV3_5G032730	3
MF	GO:0008270	zinc ion binding	26/474	335/9200	0.0237887	0.626965	CsaV3_1G001080/CsaV3_1G009120/CsaV3_1G031230/CsaV3_1G036130/CsaV3_1G039540/CsaV3_1G039720/CsaV3_2G003370/CsaV3_2G029230/CsaV3_2G030320/CsaV3_3G000040/CsaV3_4G001190/CsaV3_4G009980/CsaV3_4G014780/CsaV3_4G029130/CsaV3_4G035880/CsaV3_5G003590/CsaV3_5G023160/CsaV3_5G037560/CsaV3_6G000250/CsaV3_6G006790/CsaV3_6G014350/CsaV3_6G017310/CsaV3_6G038880/CsaV3_6G046850/CsaV3_6G046900/CsaV3_6G050990	CsaV3_1G001080/CsaV3_1G009120/CsaV3_1G031230/CsaV3_1G036130/CsaV3_1G039540/CsaV3_1G039720/CsaV3_2G003370/CsaV3_2G029230/CsaV3_2G030320/CsaV3_3G000040/CsaV3_4G001190/CsaV3_4G009980/CsaV3_4G014780/CsaV3_4G029130/CsaV3_4G035880/CsaV3_5G003590/CsaV3_5G023160/CsaV3_5G037560/CsaV3_6G000250/CsaV3_6G006790/CsaV3_6G014350/CsaV3_6G017310/CsaV3_6G038880/CsaV3_6G046850/CsaV3_6G046900/CsaV3_6G050990	26
MF	GO:0016892	endoribonuclease activity, producing 3'-phosphomonoesters	3/474	13/9200	0.0264052	0.626965	CsaV3_3G035380/CsaV3_3G041400/CsaV3_5G032730	CsaV3_3G035380/CsaV3_3G041400/CsaV3_5G032730	3
MF	GO:0016894	endonuclease activity, active with either ribo- or deoxyribonucleic acids and producing 3'-phosphomonoesters	3/474	13/9200	0.0264052	0.626965	CsaV3_3G035380/CsaV3_3G041400/CsaV3_5G032730	CsaV3_3G035380/CsaV3_3G041400/CsaV3_5G032730	3
MF	GO:0020037	heme binding	23/474	299/9200	0.0351488	0.626965	CsaV3_1G009100/CsaV3_2G016300/CsaV3_2G034090/CsaV3_2G034100/CsaV3_2G036310/CsaV3_3G009480/CsaV3_3G035690/CsaV3_3G043920/CsaV3_3G044670/CsaV3_3G044700/CsaV3_3G044740/CsaV3_4G034320/CsaV3_4G037260/CsaV3_5G003490/CsaV3_5G005800/CsaV3_5G011160/CsaV3_5G033660/CsaV3_6G005630/CsaV3_6G043650/CsaV3_6G045850/CsaV3_6G045870/CsaV3_6G045890/CsaV3_6G049160	CsaV3_1G009100/CsaV3_2G016300/CsaV3_2G034090/CsaV3_2G034100/CsaV3_2G036310/CsaV3_3G009480/CsaV3_3G035690/CsaV3_3G043920/CsaV3_3G044670/CsaV3_3G044700/CsaV3_3G044740/CsaV3_4G034320/CsaV3_4G037260/CsaV3_5G003490/CsaV3_5G005800/CsaV3_5G011160/CsaV3_5G033660/CsaV3_6G005630/CsaV3_6G043650/CsaV3_6G045850/CsaV3_6G045870/CsaV3_6G045890/CsaV3_6G049160	23
MF	GO:0140110	transcription regulator activity	29/474	397/9200	0.0357825	0.626965	CsaV3_1G009120/CsaV3_1G024370/CsaV3_1G037680/CsaV3_1G039550/CsaV3_2G004160/CsaV3_2G026630/CsaV3_2G029010/CsaV3_2G034030/CsaV3_3G000040/CsaV3_3G000870/CsaV3_3G026410/CsaV3_3G046530/CsaV3_4G003030/CsaV3_4G004890/CsaV3_4G008480/CsaV3_4G011850/CsaV3_5G004890/CsaV3_5G006350/CsaV3_5G033640/CsaV3_5G040310/CsaV3_6G006010/CsaV3_6G006020/CsaV3_6G013820/CsaV3_6G039830/CsaV3_6G046080/CsaV3_6G046850/CsaV3_6G0…	CsaV3_1G009120/CsaV3_1G024370/CsaV3_1G037680/CsaV3_1G039550/CsaV3_2G004160/CsaV3_2G026630/CsaV3_2G029010/CsaV3_2G034030/CsaV3_3G000040/CsaV3_3G000870/CsaV3_3G026410/CsaV3_3G046530/CsaV3_4G003030/CsaV3_4G004890/CsaV3_4G008480/CsaV3_4G011850/CsaV3_5G004890/CsaV3_5G006350/CsaV3_5G033640/CsaV3_5G040310/CsaV3_6G006010/CsaV3_6G006020/CsaV3_6G013820/CsaV3_6G039830/CsaV3_6G046080/CsaV3_6G046850/CsaV3_6G0…	29
MF	GO:0046906	tetrapyrrole binding	23/474	303/9200	0.0399613	0.626965	CsaV3_1G009100/CsaV3_2G016300/CsaV3_2G034090/CsaV3_2G034100/CsaV3_2G036310/CsaV3_3G009480/CsaV3_3G035690/CsaV3_3G043920/CsaV3_3G044670/CsaV3_3G044700/CsaV3_3G044740/CsaV3_4G034320/CsaV3_4G037260/CsaV3_5G003490/CsaV3_5G005800/CsaV3_5G011160/CsaV3_5G033660/CsaV3_6G005630/CsaV3_6G043650/CsaV3_6G045850/CsaV3_6G045870/CsaV3_6G045890/CsaV3_6G049160	CsaV3_1G009100/CsaV3_2G016300/CsaV3_2G034090/CsaV3_2G034100/CsaV3_2G036310/CsaV3_3G009480/CsaV3_3G035690/CsaV3_3G043920/CsaV3_3G044670/CsaV3_3G044700/CsaV3_3G044740/CsaV3_4G034320/CsaV3_4G037260/CsaV3_5G003490/CsaV3_5G005800/CsaV3_5G011160/CsaV3_5G033660/CsaV3_6G005630/CsaV3_6G043650/CsaV3_6G045850/CsaV3_6G045870/CsaV3_6G045890/CsaV3_6G049160	23
MF	GO:0004553	hydrolase activity, hydrolyzing O-glycosyl compounds	22/474	296/9200	0.0530574	0.626965	CsaV3_1G011350/CsaV3_3G004100/CsaV3_3G008480/CsaV3_3G015320/CsaV3_3G032100/CsaV3_3G040580/CsaV3_4G029540/CsaV3_4G031240/CsaV3_5G000810/CsaV3_5G005910/CsaV3_5G011220/CsaV3_5G025300/CsaV3_5G030780/CsaV3_5G032400/CsaV3_5G039830/CsaV3_6G005730/CsaV3_6G022480/CsaV3_6G036420/CsaV3_6G038030/CsaV3_6G038040/CsaV3_7G019950/CsaV3_UNG233340	CsaV3_1G011350/CsaV3_3G004100/CsaV3_3G008480/CsaV3_3G015320/CsaV3_3G032100/CsaV3_3G040580/CsaV3_4G029540/CsaV3_4G031240/CsaV3_5G000810/CsaV3_5G005910/CsaV3_5G011220/CsaV3_5G025300/CsaV3_5G030780/CsaV3_5G032400/CsaV3_5G039830/CsaV3_6G005730/CsaV3_6G022480/CsaV3_6G036420/CsaV3_6G038030/CsaV3_6G038040/CsaV3_7G019950/CsaV3_UNG233340	22
MF	GO:0016701	oxidoreductase activity, acting on single donors with incorporation of molecular oxygen	6/474	54/9200	0.0579738	0.626965	CsaV3_1G040000/CsaV3_2G005350/CsaV3_2G005360/CsaV3_2G006420/CsaV3_4G023880/CsaV3_4G023910	CsaV3_1G040000/CsaV3_2G005350/CsaV3_2G005360/CsaV3_2G006420/CsaV3_4G023880/CsaV3_4G023910	6
MF	GO:0000988	transcription factor activity, protein binding	4/474	29/9200	0.0596009	0.626965	CsaV3_1G009120/CsaV3_3G000040/CsaV3_3G000870/CsaV3_6G039830	CsaV3_1G009120/CsaV3_3G000040/CsaV3_3G000870/CsaV3_6G039830	4
MF	GO:0004519	endonuclease activity	4/474	29/9200	0.0596009	0.626965	CsaV3_1G011850/CsaV3_3G035380/CsaV3_3G041400/CsaV3_5G032730	CsaV3_1G011850/CsaV3_3G035380/CsaV3_3G041400/CsaV3_5G032730	4
MF	GO:0016702	oxidoreductase activity, acting on single donors with incorporation of molecular oxygen, incorporation of two atoms of oxygen	5/474	43/9200	0.0685205	0.626965	CsaV3_2G005350/CsaV3_2G005360/CsaV3_2G006420/CsaV3_4G023880/CsaV3_4G023910	CsaV3_2G005350/CsaV3_2G005360/CsaV3_2G006420/CsaV3_4G023880/CsaV3_4G023910	5
MF	GO:0004650	polygalacturonase activity	6/474	57/9200	0.0717718	0.626965	CsaV3_1G011350/CsaV3_3G032100/CsaV3_4G031240/CsaV3_5G025300/CsaV3_7G019950/CsaV3_UNG233340	CsaV3_1G011350/CsaV3_3G032100/CsaV3_4G031240/CsaV3_5G025300/CsaV3_7G019950/CsaV3_UNG233340	6
MF	GO:0016667	oxidoreductase activity, acting on a sulfur group of donors	6/474	57/9200	0.0717718	0.626965	CsaV3_3G045250/CsaV3_4G000440/CsaV3_4G027810/CsaV3_6G007950/CsaV3_6G017370/CsaV3_7G002220	CsaV3_3G045250/CsaV3_4G000440/CsaV3_4G027810/CsaV3_6G007950/CsaV3_6G017370/CsaV3_7G002220	6
MF	GO:0003700	DNA binding transcription factor activity	26/474	374/9200	0.0728321	0.626965	CsaV3_1G024370/CsaV3_1G037680/CsaV3_1G039550/CsaV3_2G004160/CsaV3_2G026630/CsaV3_2G029010/CsaV3_2G034030/CsaV3_3G026410/CsaV3_3G046530/CsaV3_4G003030/CsaV3_4G004890/CsaV3_4G008480/CsaV3_4G011850/CsaV3_5G004890/CsaV3_5G006350/CsaV3_5G033640/CsaV3_5G040310/CsaV3_6G006010/CsaV3_6G006020/CsaV3_6G013820/CsaV3_6G039830/CsaV3_6G046080/CsaV3_6G046850/CsaV3_6G048830/CsaV3_UNG146120/CsaV3_UNG183410	CsaV3_1G024370/CsaV3_1G037680/CsaV3_1G039550/CsaV3_2G004160/CsaV3_2G026630/CsaV3_2G029010/CsaV3_2G034030/CsaV3_3G026410/CsaV3_3G046530/CsaV3_4G003030/CsaV3_4G004890/CsaV3_4G008480/CsaV3_4G011850/CsaV3_5G004890/CsaV3_5G006350/CsaV3_5G033640/CsaV3_5G040310/CsaV3_6G006010/CsaV3_6G006020/CsaV3_6G013820/CsaV3_6G039830/CsaV3_6G046080/CsaV3_6G046850/CsaV3_6G048830/CsaV3_UNG146120/CsaV3_UNG183410	26
MF	GO:0051213	dioxygenase activity	5/474	45/9200	0.0801184	0.626965	CsaV3_2G005350/CsaV3_2G005360/CsaV3_2G006420/CsaV3_4G023880/CsaV3_4G023910	CsaV3_2G005350/CsaV3_2G005360/CsaV3_2G006420/CsaV3_4G023880/CsaV3_4G023910	5
MF	GO:0004857	enzyme inhibitor activity	8/474	88/9200	0.0829267	0.626965	CsaV3_1G002510/CsaV3_2G005010/CsaV3_3G009850/CsaV3_3G009870/CsaV3_3G016220/CsaV3_5G013360/CsaV3_6G021220/CsaV3_7G029270	CsaV3_1G002510/CsaV3_2G005010/CsaV3_3G009850/CsaV3_3G009870/CsaV3_3G016220/CsaV3_5G013360/CsaV3_6G021220/CsaV3_7G029270	8
MF	GO:0005506	iron ion binding	17/474	230/9200	0.0850241	0.626965	CsaV3_1G009100/CsaV3_1G040000/CsaV3_2G036310/CsaV3_3G009480/CsaV3_3G043920/CsaV3_3G044670/CsaV3_3G044700/CsaV3_3G044740/CsaV3_4G034320/CsaV3_5G003490/CsaV3_5G005800/CsaV3_5G011160/CsaV3_6G043650/CsaV3_6G045850/CsaV3_6G045870/CsaV3_6G045890/CsaV3_6G049160	CsaV3_1G009100/CsaV3_1G040000/CsaV3_2G036310/CsaV3_3G009480/CsaV3_3G043920/CsaV3_3G044670/CsaV3_3G044700/CsaV3_3G044740/CsaV3_4G034320/CsaV3_5G003490/CsaV3_5G005800/CsaV3_5G011160/CsaV3_6G043650/CsaV3_6G045850/CsaV3_6G045870/CsaV3_6G045890/CsaV3_6G049160	17
MF	GO:0016798	hydrolase activity, acting on glycosyl bonds	22/474	313/9200	0.0853405	0.626965	CsaV3_1G011350/CsaV3_3G004100/CsaV3_3G008480/CsaV3_3G015320/CsaV3_3G032100/CsaV3_3G040580/CsaV3_4G029540/CsaV3_4G031240/CsaV3_5G000810/CsaV3_5G005910/CsaV3_5G011220/CsaV3_5G025300/CsaV3_5G030780/CsaV3_5G032400/CsaV3_5G039830/CsaV3_6G005730/CsaV3_6G022480/CsaV3_6G036420/CsaV3_6G038030/CsaV3_6G038040/CsaV3_7G019950/CsaV3_UNG233340	CsaV3_1G011350/CsaV3_3G004100/CsaV3_3G008480/CsaV3_3G015320/CsaV3_3G032100/CsaV3_3G040580/CsaV3_4G029540/CsaV3_4G031240/CsaV3_5G000810/CsaV3_5G005910/CsaV3_5G011220/CsaV3_5G025300/CsaV3_5G030780/CsaV3_5G032400/CsaV3_5G039830/CsaV3_6G005730/CsaV3_6G022480/CsaV3_6G036420/CsaV3_6G038030/CsaV3_6G038040/CsaV3_7G019950/CsaV3_UNG233340	22
MF	GO:0030599	pectinesterase activity	5/474	46/9200	0.0862861	0.626965	CsaV3_1G041370/CsaV3_2G028840/CsaV3_3G009850/CsaV3_3G009870/CsaV3_7G030240	CsaV3_1G041370/CsaV3_2G028840/CsaV3_3G009850/CsaV3_3G009870/CsaV3_7G030240	5
MF	GO:0004866	endopeptidase inhibitor activity	2/474	2666546	0.0906323	0.626965	CsaV3_2G005010/CsaV3_5G013360	CsaV3_2G005010/CsaV3_5G013360	2
MF	GO:0030414	peptidase inhibitor activity	2/474	2666546	0.0906323	0.626965	CsaV3_2G005010/CsaV3_5G013360	CsaV3_2G005010/CsaV3_5G013360	2
MF	GO:0061134	peptidase regulator activity	2/474	2666546	0.0906323	0.626965	CsaV3_2G005010/CsaV3_5G013360	CsaV3_2G005010/CsaV3_5G013360	2
MF	GO:0061135	endopeptidase regulator activity	2/474	2666546	0.0906323	0.626965	CsaV3_2G005010/CsaV3_5G013360	CsaV3_2G005010/CsaV3_5G013360	2
MF	GO:0015297	antiporter activity	7/474	75/9200	0.0906389	0.626965	CsaV3_1G039520/CsaV3_1G039850/CsaV3_3G021900/CsaV3_4G006280/CsaV3_4G024790/CsaV3_5G003620/CsaV3_5G024690	CsaV3_1G039520/CsaV3_1G039850/CsaV3_3G021900/CsaV3_4G006280/CsaV3_4G024790/CsaV3_5G003620/CsaV3_5G024690	7
MF	GO:0015036	disulfide oxidoreductase activity	5/474	49/9200	0.10622	0.626965	CsaV3_3G045250/CsaV3_4G027810/CsaV3_6G007950/CsaV3_6G017370/CsaV3_7G002220	CsaV3_3G045250/CsaV3_4G027810/CsaV3_6G007950/CsaV3_6G017370/CsaV3_7G002220	5
MF	GO:0016668	oxidoreductase activity, acting on a sulfur group of donors, NAD(P) as acceptor	2/474	2666577	0.107118	0.626965	CsaV3_3G045250/CsaV3_7G002220	CsaV3_3G045250/CsaV3_7G002220	2
MF	GO:0047134	protein-disulfide reductase activity	2/474	2666577	0.107118	0.626965	CsaV3_3G045250/CsaV3_7G002220	CsaV3_3G045250/CsaV3_7G002220	2
MF	GO:0016705	oxidoreductase activity, acting on paired donors, with incorporation or reduction of molecular oxygen	17/474	238/9200	0.107404	0.626965	CsaV3_1G009100/CsaV3_2G036310/CsaV3_3G009480/CsaV3_3G043920/CsaV3_3G044670/CsaV3_3G044700/CsaV3_3G044740/CsaV3_4G034320/CsaV3_5G003490/CsaV3_5G005800/CsaV3_5G011160/CsaV3_6G035540/CsaV3_6G043650/CsaV3_6G045850/CsaV3_6G045870/CsaV3_6G045890/CsaV3_6G049160	CsaV3_1G009100/CsaV3_2G036310/CsaV3_3G009480/CsaV3_3G043920/CsaV3_3G044670/CsaV3_3G044700/CsaV3_3G044740/CsaV3_4G034320/CsaV3_5G003490/CsaV3_5G005800/CsaV3_5G011160/CsaV3_6G035540/CsaV3_6G043650/CsaV3_6G045850/CsaV3_6G045870/CsaV3_6G045890/CsaV3_6G049160	17
MF	GO:0015291	secondary active transmembrane transporter activity	7/474	79/9200	0.11165	0.626965	CsaV3_1G039520/CsaV3_1G039850/CsaV3_3G021900/CsaV3_4G006280/CsaV3_4G024790/CsaV3_5G003620/CsaV3_5G024690	CsaV3_1G039520/CsaV3_1G039850/CsaV3_3G021900/CsaV3_4G006280/CsaV3_4G024790/CsaV3_5G003620/CsaV3_5G024690	7
MF	GO:0000989	transcription factor activity, transcription factor binding	3/474	23/9200	0.112292	0.626965	CsaV3_1G009120/CsaV3_3G000040/CsaV3_3G000870	CsaV3_1G009120/CsaV3_3G000040/CsaV3_3G000870	3
MF	GO:0003712	transcription cofactor activity	3/474	23/9200	0.112292	0.626965	CsaV3_1G009120/CsaV3_3G000040/CsaV3_3G000870	CsaV3_1G009120/CsaV3_3G000040/CsaV3_3G000870	3
MF	GO:0015077	monovalent inorganic cation transmembrane transporter activity	7/474	81/9200	0.123042	0.644202	CsaV3_1G010220/CsaV3_1G039520/CsaV3_3G021900/CsaV3_4G002080/CsaV3_4G006280/CsaV3_4G024790/CsaV3_5G024690	CsaV3_1G010220/CsaV3_1G039520/CsaV3_3G021900/CsaV3_4G002080/CsaV3_4G006280/CsaV3_4G024790/CsaV3_5G024690	7
MF	GO:0004521	endoribonuclease activity	3/474	24/9200	0.123681	0.644202	CsaV3_3G035380/CsaV3_3G041400/CsaV3_5G032730	CsaV3_3G035380/CsaV3_3G041400/CsaV3_5G032730	3
MF	GO:0004842	ubiquitin-protein transferase activity	5/474	52/9200	0.128199	0.644202	CsaV3_1G001800/CsaV3_3G036630/CsaV3_5G004830/CsaV3_5G013610/CsaV3_6G001940	CsaV3_1G001800/CsaV3_3G036630/CsaV3_5G004830/CsaV3_5G013610/CsaV3_6G001940	5
MF	GO:0019787	ubiquitin-like protein transferase activity	5/474	52/9200	0.128199	0.644202	CsaV3_1G001800/CsaV3_3G036630/CsaV3_5G004830/CsaV3_5G013610/CsaV3_6G001940	CsaV3_1G001800/CsaV3_3G036630/CsaV3_5G004830/CsaV3_5G013610/CsaV3_6G001940	5
MF	GO:0010333	terpene synthase activity	3/474	25/9200	0.135468	0.645951	CsaV3_1G011400/CsaV3_2G017870/CsaV3_3G003660	CsaV3_1G011400/CsaV3_2G017870/CsaV3_3G003660	3
MF	GO:0004601	peroxidase activity	8/474	99/9200	0.137431	0.645951	CsaV3_2G016300/CsaV3_2G034090/CsaV3_2G034100/CsaV3_3G035690/CsaV3_4G037260/CsaV3_5G033660/CsaV3_6G005630/CsaV3_7G028610	CsaV3_2G016300/CsaV3_2G034090/CsaV3_2G034100/CsaV3_3G035690/CsaV3_4G037260/CsaV3_5G033660/CsaV3_6G005630/CsaV3_7G028610	8
MF	GO:0009055	electron transfer activity	9/474	115/9200	0.138188	0.645951	CsaV3_4G027810/CsaV3_5G003550/CsaV3_5G003560/CsaV3_6G007950/CsaV3_6G017370/CsaV3_7G032370/CsaV3_7G032380/CsaV3_7G032390/CsaV3_UNG091710	CsaV3_4G027810/CsaV3_5G003550/CsaV3_5G003560/CsaV3_6G007950/CsaV3_6G017370/CsaV3_7G032370/CsaV3_7G032380/CsaV3_7G032390/CsaV3_UNG091710	9
MF	GO:0016684	oxidoreductase activity, acting on peroxide as acceptor	8/474	101/9200	0.14892	0.680294	CsaV3_2G016300/CsaV3_2G034090/CsaV3_2G034100/CsaV3_3G035690/CsaV3_4G037260/CsaV3_5G033660/CsaV3_6G005630/CsaV3_7G028610	CsaV3_2G016300/CsaV3_2G034090/CsaV3_2G034100/CsaV3_3G035690/CsaV3_4G037260/CsaV3_5G033660/CsaV3_6G005630/CsaV3_7G028610	8
MF	GO:0016627	oxidoreductase activity, acting on the CH-CH group of donors	3/474	27/9200	0.160113	0.699626	CsaV3_2G034560/CsaV3_5G035120/CsaV3_6G021710	CsaV3_2G034560/CsaV3_5G035120/CsaV3_6G021710	3
MF	GO:0016838	carbon-oxygen lyase activity, acting on phosphates	3/474	27/9200	0.160113	0.699626	CsaV3_1G011400/CsaV3_2G017870/CsaV3_3G003660	CsaV3_1G011400/CsaV3_2G017870/CsaV3_3G003660	3
MF	GO:0016209	antioxidant activity	8/474	105/9200	0.173234	0.705906	CsaV3_2G016300/CsaV3_2G034090/CsaV3_2G034100/CsaV3_3G035690/CsaV3_4G037260/CsaV3_5G033660/CsaV3_6G005630/CsaV3_7G028610	CsaV3_2G016300/CsaV3_2G034090/CsaV3_2G034100/CsaV3_3G035690/CsaV3_4G037260/CsaV3_5G033660/CsaV3_6G005630/CsaV3_7G028610	8
MF	GO:0016829	lyase activity	9/474	122/9200	0.177096	0.705906	CsaV3_1G011400/CsaV3_2G017870/CsaV3_2G030320/CsaV3_2G035120/CsaV3_3G003660/CsaV3_3G040310/CsaV3_4G014780/CsaV3_5G008870/CsaV3_UNG000020	CsaV3_1G011400/CsaV3_2G017870/CsaV3_2G030320/CsaV3_2G035120/CsaV3_3G003660/CsaV3_3G040310/CsaV3_4G014780/CsaV3_5G008870/CsaV3_UNG000020	9
MF	GO:0016835	carbon-oxygen lyase activity	5/474	58/9200	0.177623	0.705906	CsaV3_1G011400/CsaV3_2G017870/CsaV3_2G030320/CsaV3_3G003660/CsaV3_4G014780	CsaV3_1G011400/CsaV3_2G017870/CsaV3_2G030320/CsaV3_3G003660/CsaV3_4G014780	5
MF	GO:0008080	N-acetyltransferase activity	2/474	15/9200	0.179111	0.705906	CsaV3_1G009120/CsaV3_3G000040	CsaV3_1G009120/CsaV3_3G000040	2
MF	GO:0015079	potassium ion transmembrane transporter activity	2/474	15/9200	0.179111	0.705906	CsaV3_1G010220/CsaV3_4G002080	CsaV3_1G010220/CsaV3_4G002080	2
MF	GO:0004540	ribonuclease activity	3/474	29/9200	0.185985	0.718904	CsaV3_3G035380/CsaV3_3G041400/CsaV3_5G032730	CsaV3_3G035380/CsaV3_3G041400/CsaV3_5G032730	3
MF	GO:0016410	N-acyltransferase activity	2/474	16/9200	0.198107	0.751312	CsaV3_1G009120/CsaV3_3G000040	CsaV3_1G009120/CsaV3_3G000040	2
MF	GO:0005516	calmodulin binding	3/474	31/9200	0.212847	0.781969	CsaV3_1G038350/CsaV3_1G038400/CsaV3_1G038540	CsaV3_1G038350/CsaV3_1G038400/CsaV3_1G038540	3
MF	GO:0004518	nuclease activity	5/474	62/9200	0.213972	0.781969	CsaV3_1G011850/CsaV3_3G035380/CsaV3_3G040040/CsaV3_3G041400/CsaV3_5G032730	CsaV3_1G011850/CsaV3_3G035380/CsaV3_3G040040/CsaV3_3G041400/CsaV3_5G032730	5
MF	GO:0016407	acetyltransferase activity	2/474	18/9200	0.236702	0.849591	CsaV3_1G009120/CsaV3_3G000040	CsaV3_1G009120/CsaV3_3G000040	2
MF	GO:0052689	carboxylic ester hydrolase activity	5/474	65/9200	0.24264	0.855626	CsaV3_1G041370/CsaV3_2G028840/CsaV3_3G009850/CsaV3_3G009870/CsaV3_7G030240	CsaV3_1G041370/CsaV3_2G028840/CsaV3_3G009850/CsaV3_3G009870/CsaV3_7G030240	5
MF	GO:0015078	proton transmembrane transporter activity	5/474	66/9200	0.252418	0.87476	CsaV3_1G039520/CsaV3_3G021900/CsaV3_4G006280/CsaV3_4G024790/CsaV3_5G024690	CsaV3_1G039520/CsaV3_3G021900/CsaV3_4G006280/CsaV3_4G024790/CsaV3_5G024690	5
MF	GO:0005215	transporter activity	28/474	479/9200	0.268588	0.915019	CsaV3_1G010220/CsaV3_1G016940/CsaV3_1G017190/CsaV3_1G033600/CsaV3_1G037390/CsaV3_1G039520/CsaV3_1G039850/CsaV3_2G010060/CsaV3_2G035020/CsaV3_3G001980/CsaV3_3G011840/CsaV3_3G013440/CsaV3_3G013450/CsaV3_3G021900/CsaV3_3G049430/CsaV3_4G002080/CsaV3_4G004100/CsaV3_4G006280/CsaV3_4G024790/CsaV3_5G003620/CsaV3_5G006040/CsaV3_5G008940/CsaV3_5G024690/CsaV3_5G026240/CsaV3_6G002230/CsaV3_6G014000/CsaV3_6G0…	CsaV3_1G010220/CsaV3_1G016940/CsaV3_1G017190/CsaV3_1G033600/CsaV3_1G037390/CsaV3_1G039520/CsaV3_1G039850/CsaV3_2G010060/CsaV3_2G035020/CsaV3_3G001980/CsaV3_3G011840/CsaV3_3G013440/CsaV3_3G013450/CsaV3_3G021900/CsaV3_3G049430/CsaV3_4G002080/CsaV3_4G004100/CsaV3_4G006280/CsaV3_4G024790/CsaV3_5G003620/CsaV3_5G006040/CsaV3_5G008940/CsaV3_5G024690/CsaV3_5G026240/CsaV3_6G002230/CsaV3_6G014000/CsaV3_6G0…	28
MF	GO:0019842	vitamin binding	5/474	70/9200	0.292408	0.958066	CsaV3_3G000880/CsaV3_4G026410/CsaV3_5G003570/CsaV3_7G029770/CsaV3_UNG183400	CsaV3_3G000880/CsaV3_4G026410/CsaV3_5G003570/CsaV3_7G029770/CsaV3_UNG183400	5
MF	GO:0016903	oxidoreductase activity, acting on the aldehyde or oxo group of donors	2/474	21/9200	0.295098	0.958066	CsaV3_6G014930/CsaV3_6G034530	CsaV3_6G014930/CsaV3_6G034530	2
MF	GO:0045735	nutrient reservoir activity	3/474	37/9200	0.297156	0.958066	CsaV3_5G035400/CsaV3_6G036330/CsaV3_6G052420	CsaV3_5G035400/CsaV3_6G036330/CsaV3_6G052420	3
MF	GO:0030234	enzyme regulator activity	8/474	123/9200	0.300289	0.958066	CsaV3_1G002510/CsaV3_2G005010/CsaV3_3G009850/CsaV3_3G009870/CsaV3_3G016220/CsaV3_5G013360/CsaV3_6G021220/CsaV3_7G029270	CsaV3_1G002510/CsaV3_2G005010/CsaV3_3G009850/CsaV3_3G009870/CsaV3_3G016220/CsaV3_5G013360/CsaV3_6G021220/CsaV3_7G029270	8
MF	GO:0015035	protein disulfide oxidoreductase activity	3/474	38/9200	0.311486	0.972453	CsaV3_4G027810/CsaV3_6G007950/CsaV3_6G017370	CsaV3_4G027810/CsaV3_6G007950/CsaV3_6G017370	3
MF	GO:0008171	O-methyltransferase activity	2/474	22/9200	0.314475	0.972453	CsaV3_5G030330/CsaV3_7G025300	CsaV3_5G030330/CsaV3_7G025300	2
MF	GO:0016762	xyloglucan:xyloglucosyl transferase activity	2/474	23/9200	0.33373	0.974213	CsaV3_6G038030/CsaV3_6G038040	CsaV3_6G038030/CsaV3_6G038040	2
MF	GO:0016788	hydrolase activity, acting on ester bonds	16/474	275/9200	0.343759	0.974213	CsaV3_1G011850/CsaV3_1G041370/CsaV3_1G045060/CsaV3_2G011000/CsaV3_2G017630/CsaV3_2G028840/CsaV3_3G009850/CsaV3_3G009870/CsaV3_3G026730/CsaV3_3G035380/CsaV3_3G040040/CsaV3_3G041400/CsaV3_5G032730/CsaV3_5G037850/CsaV3_6G016260/CsaV3_7G030240	CsaV3_1G011850/CsaV3_1G041370/CsaV3_1G045060/CsaV3_2G011000/CsaV3_2G017630/CsaV3_2G028840/CsaV3_3G009850/CsaV3_3G009870/CsaV3_3G026730/CsaV3_3G035380/CsaV3_3G040040/CsaV3_3G041400/CsaV3_5G032730/CsaV3_5G037850/CsaV3_6G016260/CsaV3_7G030240	16
MF	GO:0030170	pyridoxal phosphate binding	4/474	58/9200	0.349968	0.974213	CsaV3_3G000880/CsaV3_5G003570/CsaV3_7G029770/CsaV3_UNG183400	CsaV3_3G000880/CsaV3_5G003570/CsaV3_7G029770/CsaV3_UNG183400	4
MF	GO:0070279	vitamin B6 binding	4/474	58/9200	0.349968	0.974213	CsaV3_3G000880/CsaV3_5G003570/CsaV3_7G029770/CsaV3_UNG183400	CsaV3_3G000880/CsaV3_5G003570/CsaV3_7G029770/CsaV3_UNG183400	4
MF	GO:0000287	magnesium ion binding	4/474	59/9200	0.361858	0.974213	CsaV3_1G011400/CsaV3_1G016970/CsaV3_2G017870/CsaV3_4G026410	CsaV3_1G011400/CsaV3_1G016970/CsaV3_2G017870/CsaV3_4G026410	4
MF	GO:0016651	oxidoreductase activity, acting on NAD(P)H	3/474	42/9200	0.368789	0.974213	CsaV3_3G045250/CsaV3_5G015950/CsaV3_7G002220	CsaV3_3G045250/CsaV3_5G015950/CsaV3_7G002220	3
MF	GO:0008234	cysteine-type peptidase activity	4/474	61/9200	0.385606	0.974213	CsaV3_4G034650/CsaV3_4G037590/CsaV3_5G031600/CsaV3_7G002070	CsaV3_4G034650/CsaV3_4G037590/CsaV3_5G031600/CsaV3_7G002070	4
MF	GO:0022890	inorganic cation transmembrane transporter activity	7/474	116/9200	0.389707	0.974213	CsaV3_1G010220/CsaV3_1G039520/CsaV3_3G021900/CsaV3_4G002080/CsaV3_4G006280/CsaV3_4G024790/CsaV3_5G024690	CsaV3_1G010220/CsaV3_1G039520/CsaV3_3G021900/CsaV3_4G002080/CsaV3_4G006280/CsaV3_4G024790/CsaV3_5G024690	7
MF	GO:0016765	transferase activity, transferring alkyl or aryl (other than methyl) groups	2/474	26/9200	0.390402	0.974213	CsaV3_2G007090/CsaV3_6G016250	CsaV3_2G007090/CsaV3_6G016250	2
MF	GO:0008324	cation transmembrane transporter activity	8/474	135/9200	0.394322	0.974213	CsaV3_1G010220/CsaV3_1G039520/CsaV3_2G010060/CsaV3_3G021900/CsaV3_4G002080/CsaV3_4G006280/CsaV3_4G024790/CsaV3_5G024690	CsaV3_1G010220/CsaV3_1G039520/CsaV3_2G010060/CsaV3_3G021900/CsaV3_4G002080/CsaV3_4G006280/CsaV3_4G024790/CsaV3_5G024690	8
MF	GO:0098772	molecular function regulator	8/474	136/9200	0.402262	0.974213	CsaV3_1G002510/CsaV3_2G005010/CsaV3_3G009850/CsaV3_3G009870/CsaV3_3G016220/CsaV3_5G013360/CsaV3_6G021220/CsaV3_7G029270	CsaV3_1G002510/CsaV3_2G005010/CsaV3_3G009850/CsaV3_3G009870/CsaV3_3G016220/CsaV3_5G013360/CsaV3_6G021220/CsaV3_7G029270	8
MF	GO:0004185	serine-type carboxypeptidase activity	2/474	27/9200	0.408825	0.974213	CsaV3_1G013570/CsaV3_4G035160	CsaV3_1G013570/CsaV3_4G035160	2
MF	GO:0016836	hydro-lyase activity	2/474	27/9200	0.408825	0.974213	CsaV3_2G030320/CsaV3_4G014780	CsaV3_2G030320/CsaV3_4G014780	2
MF	GO:0000155	phosphorelay sensor kinase activity	1/474	2666546	0.410942	0.974213	CsaV3_6G008270	CsaV3_6G008270	1
MF	GO:0004673	protein histidine kinase activity	1/474	2666546	0.410942	0.974213	CsaV3_6G008270	CsaV3_6G008270	1
MF	GO:0016679	oxidoreductase activity, acting on diphenols and related substances as donors	1/474	2666546	0.410942	0.974213	CsaV3_1G012070	CsaV3_1G012070	1
MF	GO:0016775	phosphotransferase activity, nitrogenous group as acceptor	1/474	2666546	0.410942	0.974213	CsaV3_6G008270	CsaV3_6G008270	1
MF	GO:0046983	protein dimerization activity	15/474	271/9200	0.425292	0.974213	CsaV3_1G003910/CsaV3_1G005290/CsaV3_1G009910/CsaV3_1G011460/CsaV3_2G016810/CsaV3_2G026540/CsaV3_3G011010/CsaV3_4G034440/CsaV3_5G040310/CsaV3_6G006010/CsaV3_6G006020/CsaV3_6G008940/CsaV3_6G028530/CsaV3_7G025300/CsaV3_7G026520	CsaV3_1G003910/CsaV3_1G005290/CsaV3_1G009910/CsaV3_1G011460/CsaV3_2G016810/CsaV3_2G026540/CsaV3_3G011010/CsaV3_4G034440/CsaV3_5G040310/CsaV3_6G006010/CsaV3_6G006020/CsaV3_6G008940/CsaV3_6G028530/CsaV3_7G025300/CsaV3_7G026520	15
MF	GO:0005543	phospholipid binding	2/474	28/9200	0.426972	0.974213	CsaV3_2G008710/CsaV3_7G010080	CsaV3_2G008710/CsaV3_7G010080	2
MF	GO:0008483	transaminase activity	1/474	2666577	0.441324	0.974213	CsaV3_UNG183400	CsaV3_UNG183400	1
MF	GO:0016655	oxidoreductase activity, acting on NAD(P)H, quinone or similar compound as acceptor	1/474	2666577	0.441324	0.974213	CsaV3_5G015950	CsaV3_5G015950	1
MF	GO:0016769	transferase activity, transferring nitrogenous groups	1/474	2666577	0.441324	0.974213	CsaV3_UNG183400	CsaV3_UNG183400	1
MF	GO:0140103	catalytic activity, acting on a glycoprotein	1/474	2666577	0.441324	0.974213	CsaV3_3G015320	CsaV3_3G015320	1
MF	GO:0015318	inorganic molecular entity transmembrane transporter activity	11/474	198/9200	0.442979	0.974213	CsaV3_1G010220/CsaV3_1G037390/CsaV3_1G039520/CsaV3_2G035020/CsaV3_3G021900/CsaV3_4G002080/CsaV3_4G006280/CsaV3_4G024790/CsaV3_5G024690/CsaV3_5G026240/CsaV3_6G014000	CsaV3_1G010220/CsaV3_1G037390/CsaV3_1G039520/CsaV3_2G035020/CsaV3_3G021900/CsaV3_4G002080/CsaV3_4G006280/CsaV3_4G024790/CsaV3_5G024690/CsaV3_5G026240/CsaV3_6G014000	11
MF	GO:0004180	carboxypeptidase activity	2/474	29/9200	0.444823	0.974213	CsaV3_1G013570/CsaV3_4G035160	CsaV3_1G013570/CsaV3_4G035160	2
MF	GO:0015075	ion transmembrane transporter activity	12/474	218/9200	0.449349	0.974213	CsaV3_1G010220/CsaV3_1G037390/CsaV3_1G039520/CsaV3_2G010060/CsaV3_2G035020/CsaV3_3G021900/CsaV3_4G002080/CsaV3_4G006280/CsaV3_4G024790/CsaV3_5G024690/CsaV3_5G026240/CsaV3_6G014000	CsaV3_1G010220/CsaV3_1G037390/CsaV3_1G039520/CsaV3_2G010060/CsaV3_2G035020/CsaV3_3G021900/CsaV3_4G002080/CsaV3_4G006280/CsaV3_4G024790/CsaV3_5G024690/CsaV3_5G026240/CsaV3_6G014000	12
MF	GO:0070008	serine-type exopeptidase activity	2/474	30/9200	0.46236	0.974213	CsaV3_1G013570/CsaV3_4G035160	CsaV3_1G013570/CsaV3_4G035160	2
MF	GO:0001076	transcription factor activity, RNA polymerase II transcription factor binding	1/474	2666607	0.470142	0.974213	CsaV3_3G000870	CsaV3_3G000870	1
MF	GO:0001104	RNA polymerase II transcription cofactor activity	1/474	2666607	0.470142	0.974213	CsaV3_3G000870	CsaV3_3G000870	1
MF	GO:0005342	organic acid transmembrane transporter activity	1/474	2666607	0.470142	0.974213	CsaV3_1G037390	CsaV3_1G037390	1
MF	GO:0015171	amino acid transmembrane transporter activity	1/474	2666607	0.470142	0.974213	CsaV3_1G037390	CsaV3_1G037390	1
MF	GO:0046943	carboxylic acid transmembrane transporter activity	1/474	2666607	0.470142	0.974213	CsaV3_1G037390	CsaV3_1G037390	1
MF	GO:0022804	active transmembrane transporter activity	7/474	127/9200	0.483078	0.980323	CsaV3_1G039520/CsaV3_1G039850/CsaV3_3G021900/CsaV3_4G006280/CsaV3_4G024790/CsaV3_5G003620/CsaV3_5G024690	CsaV3_1G039520/CsaV3_1G039850/CsaV3_3G021900/CsaV3_4G006280/CsaV3_4G024790/CsaV3_5G003620/CsaV3_5G024690	7
MF	GO:0016758	transferase activity, transferring hexosyl groups	13/474	244/9200	0.491597	0.980323	CsaV3_2G003280/CsaV3_2G034660/CsaV3_4G032280/CsaV3_6G015950/CsaV3_6G038030/CsaV3_6G038040/CsaV3_6G044900/CsaV3_6G044910/CsaV3_7G005990/CsaV3_7G006580/CsaV3_7G006620/CsaV3_7G006630/CsaV3_7G008160	CsaV3_2G003280/CsaV3_2G034660/CsaV3_4G032280/CsaV3_6G015950/CsaV3_6G038030/CsaV3_6G038040/CsaV3_6G044900/CsaV3_6G044910/CsaV3_7G005990/CsaV3_7G006580/CsaV3_7G006620/CsaV3_7G006630/CsaV3_7G008160	13
MF	GO:0019899	enzyme binding	2/474	32/9200	0.496434	0.980323	CsaV3_3G007970/CsaV3_6G009080	CsaV3_3G007970/CsaV3_6G009080	2
MF	GO:0008514	organic anion transmembrane transporter activity	1/474	13/9200	0.497477	0.980323	CsaV3_1G037390	CsaV3_1G037390	1
MF	GO:1901681	sulfur compound binding	1/474	13/9200	0.497477	0.980323	CsaV3_4G026410	CsaV3_4G026410	1
MF	GO:0022857	transmembrane transporter activity	19/474	363/9200	0.506164	0.987757	CsaV3_1G010220/CsaV3_1G037390/CsaV3_1G039520/CsaV3_1G039850/CsaV3_2G010060/CsaV3_2G035020/CsaV3_3G013440/CsaV3_3G013450/CsaV3_3G021900/CsaV3_4G002080/CsaV3_4G004100/CsaV3_4G006280/CsaV3_4G024790/CsaV3_5G003620/CsaV3_5G006040/CsaV3_5G024690/CsaV3_5G026240/CsaV3_6G014000/CsaV3_6G038210	CsaV3_1G010220/CsaV3_1G037390/CsaV3_1G039520/CsaV3_1G039850/CsaV3_2G010060/CsaV3_2G035020/CsaV3_3G013440/CsaV3_3G013450/CsaV3_3G021900/CsaV3_4G002080/CsaV3_4G004100/CsaV3_4G006280/CsaV3_4G024790/CsaV3_5G003620/CsaV3_5G006040/CsaV3_5G024690/CsaV3_5G026240/CsaV3_6G014000/CsaV3_6G038210	19
MF	GO:0016620	oxidoreductase activity, acting on the aldehyde or oxo group of donors, NAD or NADP as acceptor	1/474	14/9200	0.523405	0.989965	CsaV3_6G014930	CsaV3_6G014930	1
MF	GO:0004871	signal transducer activity	3/474	55/9200	0.544321	0.989965	CsaV3_2G035020/CsaV3_3G023600/CsaV3_6G008270	CsaV3_2G035020/CsaV3_3G023600/CsaV3_6G008270	3
MF	GO:0043531	ADP binding	3/474	55/9200	0.544321	0.989965	CsaV3_1G020740/CsaV3_2G003160/CsaV3_2G009560	CsaV3_1G020740/CsaV3_2G003160/CsaV3_2G009560	3
MF	GO:0015116	sulfate transmembrane transporter activity	1/474	15/9200	0.547997	0.989965	CsaV3_5G026240	CsaV3_5G026240	1
MF	GO:0017016	Ras GTPase binding	1/474	15/9200	0.547997	0.989965	CsaV3_3G007970	CsaV3_3G007970	1
MF	GO:0031267	small GTPase binding	1/474	15/9200	0.547997	0.989965	CsaV3_3G007970	CsaV3_3G007970	1
MF	GO:1901682	sulfur compound transmembrane transporter activity	1/474	15/9200	0.547997	0.989965	CsaV3_5G026240	CsaV3_5G026240	1
MF	GO:0038023	signaling receptor activity	2/474	36/9200	0.560299	0.989965	CsaV3_2G035020/CsaV3_6G008270	CsaV3_2G035020/CsaV3_6G008270	2
MF	GO:0060089	molecular transducer activity	2/474	36/9200	0.560299	0.989965	CsaV3_2G035020/CsaV3_6G008270	CsaV3_2G035020/CsaV3_6G008270	2
MF	GO:0050660	flavin adenine dinucleotide binding	5/474	97/9200	0.564636	0.989965	CsaV3_1G037070/CsaV3_1G037510/CsaV3_6G021710/CsaV3_6G035540/CsaV3_6G052530	CsaV3_1G037070/CsaV3_1G037510/CsaV3_6G021710/CsaV3_6G035540/CsaV3_6G052530	5
MF	GO:0003993	acid phosphatase activity	1/474	16/9200	0.571323	0.989965	CsaV3_5G037850	CsaV3_5G037850	1
MF	GO:0008081	phosphoric diester hydrolase activity	1/474	16/9200	0.571323	0.989965	CsaV3_3G026730	CsaV3_3G026730	1
MF	GO:0008408	3'-5' exonuclease activity	1/474	16/9200	0.571323	0.989965	CsaV3_3G040040	CsaV3_3G040040	1
MF	GO:0004499	N,N-dimethylaniline monooxygenase activity	1/474	17/9200	0.593448	0.999991	CsaV3_6G035540	CsaV3_6G035540	1
MF	GO:0016757	transferase activity, transferring glycosyl groups	15/474	302/9200	0.597019	0.999991	CsaV3_2G003280/CsaV3_2G034660/CsaV3_3G027760/CsaV3_4G028900/CsaV3_4G032280/CsaV3_6G015950/CsaV3_6G038030/CsaV3_6G038040/CsaV3_6G044900/CsaV3_6G044910/CsaV3_7G005990/CsaV3_7G006580/CsaV3_7G006620/CsaV3_7G006630/CsaV3_7G008160	CsaV3_2G003280/CsaV3_2G034660/CsaV3_3G027760/CsaV3_4G028900/CsaV3_4G032280/CsaV3_6G015950/CsaV3_6G038030/CsaV3_6G038040/CsaV3_6G044900/CsaV3_6G044910/CsaV3_7G005990/CsaV3_7G006580/CsaV3_7G006620/CsaV3_7G006630/CsaV3_7G008160	15
MF	GO:0008509	anion transmembrane transporter activity	2/474	39/9200	0.604273	0.999991	CsaV3_1G037390/CsaV3_5G026240	CsaV3_1G037390/CsaV3_5G026240	2
MF	GO:0004527	exonuclease activity	1/474	19/9200	0.634337	0.999991	CsaV3_3G040040	CsaV3_3G040040	1
MF	GO:0016709	oxidoreductase activity, acting on paired donors, with incorporation or reduction of molecular oxygen, NAD(P)H as one donor, and incorporation of one atom of oxygen	1/474	19/9200	0.634337	0.999991	CsaV3_6G035540	CsaV3_6G035540	1
MF	GO:0016746	transferase activity, transferring acyl groups	7/474	149/9200	0.653226	0.999991	CsaV3_1G009120/CsaV3_1G009380/CsaV3_1G009520/CsaV3_3G000040/CsaV3_5G006620/CsaV3_5G029730/CsaV3_7G030150	CsaV3_1G009120/CsaV3_1G009380/CsaV3_1G009520/CsaV3_3G000040/CsaV3_5G006620/CsaV3_5G029730/CsaV3_7G030150	7
MF	GO:0008238	exopeptidase activity	2/474	44/9200	0.670013	0.999991	CsaV3_1G013570/CsaV3_4G035160	CsaV3_1G013570/CsaV3_4G035160	2
MF	GO:0051020	GTPase binding	1/474	21/9200	0.671121	0.999991	CsaV3_3G007970	CsaV3_3G007970	1
MF	GO:0015238	drug transmembrane transporter activity	2/474	45/9200	0.682049	0.999991	CsaV3_1G039850/CsaV3_5G003620	CsaV3_1G039850/CsaV3_5G003620	2
MF	GO:0030246	carbohydrate binding	5/474	112/9200	0.691343	0.999991	CsaV3_1G012900/CsaV3_3G043890/CsaV3_4G029540/CsaV3_6G015090/CsaV3_7G000950	CsaV3_1G012900/CsaV3_3G043890/CsaV3_4G029540/CsaV3_6G015090/CsaV3_7G000950	5
MF	GO:0016747	transferase activity, transferring acyl groups other than amino-acyl groups	5/474	113/9200	0.698826	0.999991	CsaV3_1G009120/CsaV3_1G009380/CsaV3_3G000040/CsaV3_5G006620/CsaV3_5G029730	CsaV3_1G009120/CsaV3_1G009380/CsaV3_3G000040/CsaV3_5G006620/CsaV3_5G029730	5
MF	GO:0050661	NADP binding	1/474	23/9200	0.704212	0.999991	CsaV3_6G035540	CsaV3_6G035540	1
MF	GO:0003777	microtubule motor activity	2/474	48/9200	0.716012	0.999991	CsaV3_1G038470/CsaV3_3G022850	CsaV3_1G038470/CsaV3_3G022850	2
MF	GO:0003743	translation initiation factor activity	1/474	24/9200	0.71949	0.999991	CsaV3_2G012490	CsaV3_2G012490	1
MF	GO:0004970	ionotropic glutamate receptor activity	1/474	24/9200	0.71949	0.999991	CsaV3_2G035020	CsaV3_2G035020	1
MF	GO:0005230	extracellular ligand-gated ion channel activity	1/474	24/9200	0.71949	0.999991	CsaV3_2G035020	CsaV3_2G035020	1
MF	GO:0008066	glutamate receptor activity	1/474	24/9200	0.71949	0.999991	CsaV3_2G035020	CsaV3_2G035020	1
MF	GO:0015276	ligand-gated ion channel activity	1/474	24/9200	0.71949	0.999991	CsaV3_2G035020	CsaV3_2G035020	1
MF	GO:0016810	hydrolase activity, acting on carbon-nitrogen (but not peptide) bonds	1/474	24/9200	0.71949	0.999991	CsaV3_6G013840	CsaV3_6G013840	1
MF	GO:0022824	transmitter-gated ion channel activity	1/474	24/9200	0.71949	0.999991	CsaV3_2G035020	CsaV3_2G035020	1
MF	GO:0022834	ligand-gated channel activity	1/474	24/9200	0.71949	0.999991	CsaV3_2G035020	CsaV3_2G035020	1
MF	GO:0022835	transmitter-gated channel activity	1/474	24/9200	0.71949	0.999991	CsaV3_2G035020	CsaV3_2G035020	1
MF	GO:0030594	neurotransmitter receptor activity	1/474	24/9200	0.71949	0.999991	CsaV3_2G035020	CsaV3_2G035020	1
MF	GO:0005216	ion channel activity	2/474	50/9200	0.736923	0.999991	CsaV3_2G035020/CsaV3_6G014000	CsaV3_2G035020/CsaV3_6G014000	2
MF	GO:0008237	metallopeptidase activity	2/474	50/9200	0.736923	0.999991	CsaV3_4G035880/CsaV3_5G037560	CsaV3_4G035880/CsaV3_5G037560	2
MF	GO:0015267	channel activity	2/474	50/9200	0.736923	0.999991	CsaV3_2G035020/CsaV3_6G014000	CsaV3_2G035020/CsaV3_6G014000	2
MF	GO:0022803	passive transmembrane transporter activity	2/474	50/9200	0.736923	0.999991	CsaV3_2G035020/CsaV3_6G014000	CsaV3_2G035020/CsaV3_6G014000	2
MF	GO:0022838	substrate-specific channel activity	2/474	50/9200	0.736923	0.999991	CsaV3_2G035020/CsaV3_6G014000	CsaV3_2G035020/CsaV3_6G014000	2
MF	GO:0046873	metal ion transmembrane transporter activity	2/474	50/9200	0.736923	0.999991	CsaV3_1G010220/CsaV3_4G002080	CsaV3_1G010220/CsaV3_4G002080	2
MF	GO:0003779	actin binding	1/474	26/9200	0.747723	0.999991	CsaV3_3G006880	CsaV3_3G006880	1
MF	GO:0004888	transmembrane signaling receptor activity	1/474	26/9200	0.747723	0.999991	CsaV3_2G035020	CsaV3_2G035020	1
MF	GO:0015103	inorganic anion transmembrane transporter activity	1/474	26/9200	0.747723	0.999991	CsaV3_5G026240	CsaV3_5G026240	1
MF	GO:0016879	ligase activity, forming carbon-nitrogen bonds	1/474	26/9200	0.747723	0.999991	CsaV3_6G036910	CsaV3_6G036910	1
MF	GO:0004497	monooxygenase activity	1/474	27/9200	0.760758	0.999991	CsaV3_6G035540	CsaV3_6G035540	1
MF	GO:0050662	coenzyme binding	12/474	275/9200	0.764631	0.999991	CsaV3_1G029310/CsaV3_1G037070/CsaV3_1G037510/CsaV3_3G000880/CsaV3_4G026410/CsaV3_5G003570/CsaV3_6G009990/CsaV3_6G021710/CsaV3_6G035540/CsaV3_6G052530/CsaV3_7G029770/CsaV3_UNG183400	CsaV3_1G029310/CsaV3_1G037070/CsaV3_1G037510/CsaV3_3G000880/CsaV3_4G026410/CsaV3_5G003570/CsaV3_6G009990/CsaV3_6G021710/CsaV3_6G035540/CsaV3_6G052530/CsaV3_7G029770/CsaV3_UNG183400	12
MF	GO:0003774	motor activity	2/474	54/9200	0.774822	0.999991	CsaV3_1G038470/CsaV3_3G022850	CsaV3_1G038470/CsaV3_3G022850	2
MF	GO:0008017	microtubule binding	2/474	55/9200	0.78352	0.999991	CsaV3_1G038470/CsaV3_3G022850	CsaV3_1G038470/CsaV3_3G022850	2
MF	GO:0022836	gated channel activity	1/474	30/9200	0.795966	0.999991	CsaV3_2G035020	CsaV3_2G035020	1
MF	GO:0022839	ion gated channel activity	1/474	30/9200	0.795966	0.999991	CsaV3_2G035020	CsaV3_2G035020	1
MF	GO:0015631	tubulin binding	2/474	60/9200	0.822715	0.999991	CsaV3_1G038470/CsaV3_3G022850	CsaV3_1G038470/CsaV3_3G022850	2
MF	GO:0008375	acetylglucosaminyltransferase activity	1/474	33/9200	0.826001	0.999991	CsaV3_2G034660	CsaV3_2G034660	1
MF	GO:0008092	cytoskeletal protein binding	3/474	86/9200	0.827254	0.999991	CsaV3_1G038470/CsaV3_3G006880/CsaV3_3G022850	CsaV3_1G038470/CsaV3_3G006880/CsaV3_3G022850	3
MF	GO:0005509	calcium ion binding	5/474	134/9200	0.827305	0.999991	CsaV3_3G003870/CsaV3_3G044850/CsaV3_5G032400/CsaV3_UNG099740/CsaV3_UNG234380	CsaV3_3G003870/CsaV3_3G044850/CsaV3_5G032400/CsaV3_UNG099740/CsaV3_UNG234380	5
MF	GO:0008289	lipid binding	2/474	61/9200	0.829747	0.999991	CsaV3_2G008710/CsaV3_7G010080	CsaV3_2G008710/CsaV3_7G010080	2
MF	GO:0003924	GTPase activity	1/474	36/9200	0.851623	0.999991	CsaV3_2G029570	CsaV3_2G029570	1
MF	GO:0008168	methyltransferase activity	5/474	142/9200	0.862834	0.999991	CsaV3_4G031990/CsaV3_5G030330/CsaV3_5G032900/CsaV3_7G022030/CsaV3_7G025300	CsaV3_4G031990/CsaV3_5G030330/CsaV3_5G032900/CsaV3_7G022030/CsaV3_7G025300	5
MF	GO:0042578	phosphoric ester hydrolase activity	2/474	69/9200	0.877525	0.999991	CsaV3_3G026730/CsaV3_5G037850	CsaV3_3G026730/CsaV3_5G037850	2
MF	GO:0008135	translation factor activity, RNA binding	1/474	40/9200	0.880025	0.999991	CsaV3_2G012490	CsaV3_2G012490	1
MF	GO:0003899	DNA-directed 5'-3' RNA polymerase activity	1/474	41/9200	0.886234	0.999991	CsaV3_3G039160	CsaV3_3G039160	1
MF	GO:0016830	carbon-carbon lyase activity	1/474	41/9200	0.886234	0.999991	CsaV3_2G035120	CsaV3_2G035120	1
MF	GO:0046527	glucosyltransferase activity	2/474	71/9200	0.887367	0.999991	CsaV3_6G038030/CsaV3_6G038040	CsaV3_6G038030/CsaV3_6G038040	2
MF	GO:0016741	transferase activity, transferring one-carbon groups	5/474	149/9200	0.888698	0.999991	CsaV3_4G031990/CsaV3_5G030330/CsaV3_5G032900/CsaV3_7G022030/CsaV3_7G025300	CsaV3_4G031990/CsaV3_5G030330/CsaV3_5G032900/CsaV3_7G022030/CsaV3_7G025300	5
MF	GO:0004222	metalloendopeptidase activity	1/474	42/9200	0.892121	0.999991	CsaV3_5G037560	CsaV3_5G037560	1
MF	GO:0016791	phosphatase activity	1/474	45/9200	0.908022	0.999991	CsaV3_5G037850	CsaV3_5G037850	1
MF	GO:0034062	5'-3' RNA polymerase activity	1/474	47/9200	0.9173	0.999991	CsaV3_3G039160	CsaV3_3G039160	1
MF	GO:0097747	RNA polymerase activity	1/474	47/9200	0.9173	0.999991	CsaV3_3G039160	CsaV3_3G039160	1
MF	GO:0005507	copper ion binding	1/474	48/9200	0.921583	0.999991	CsaV3_5G035880	CsaV3_5G035880	1
MF	GO:0008233	peptidase activity	9/474	259/9200	0.923442	0.999991	CsaV3_1G013570/CsaV3_2G025690/CsaV3_4G034650/CsaV3_4G035160/CsaV3_4G035880/CsaV3_4G037590/CsaV3_5G031600/CsaV3_5G037560/CsaV3_7G002070	CsaV3_1G013570/CsaV3_2G025690/CsaV3_4G034650/CsaV3_4G035160/CsaV3_4G035880/CsaV3_4G037590/CsaV3_5G031600/CsaV3_5G037560/CsaV3_7G002070	9
MF	GO:0016779	nucleotidyltransferase activity	2/474	85/9200	0.938185	0.999991	CsaV3_3G039160/CsaV3_6G015080	CsaV3_3G039160/CsaV3_6G015080	2
MF	GO:0016614	oxidoreductase activity, acting on CH-OH group of donors	4/474	142/9200	0.939521	0.999991	CsaV3_1G037070/CsaV3_1G037510/CsaV3_6G009990/CsaV3_6G052530	CsaV3_1G037070/CsaV3_1G037510/CsaV3_6G009990/CsaV3_6G052530	4
MF	GO:0070011	peptidase activity, acting on L-amino acid peptides	8/474	250/9200	0.949297	0.999991	CsaV3_1G013570/CsaV3_4G034650/CsaV3_4G035160/CsaV3_4G035880/CsaV3_4G037590/CsaV3_5G031600/CsaV3_5G037560/CsaV3_7G002070	CsaV3_1G013570/CsaV3_4G034650/CsaV3_4G035160/CsaV3_4G035880/CsaV3_4G037590/CsaV3_5G031600/CsaV3_5G037560/CsaV3_7G002070	8
MF	GO:0140098	catalytic activity, acting on RNA	4/474	148/9200	0.951119	0.999991	CsaV3_3G035380/CsaV3_3G039160/CsaV3_3G041400/CsaV3_5G032730	CsaV3_3G035380/CsaV3_3G039160/CsaV3_3G041400/CsaV3_5G032730	4
MF	GO:0003690	double-stranded DNA binding	1/474	61/9200	0.960739	0.999991	CsaV3_4G004910	CsaV3_4G004910	1
MF	GO:0016887	ATPase activity	3/474	127/9200	0.96282	0.999991	CsaV3_3G006130/CsaV3_4G007990/CsaV3_6G040470	CsaV3_3G006130/CsaV3_4G007990/CsaV3_6G040470	3
MF	GO:0046982	protein heterodimerization activity	1/474	63/9200	0.964707	0.999991	CsaV3_1G009910	CsaV3_1G009910	1
MF	GO:0016853	isomerase activity	2/474	100/9200	0.968196	0.999991	CsaV3_4G036100/CsaV3_6G015090	CsaV3_4G036100/CsaV3_6G015090	2
MF	GO:0008236	serine-type peptidase activity	2/474	102/9200	0.970933	0.999991	CsaV3_1G013570/CsaV3_4G035160	CsaV3_1G013570/CsaV3_4G035160	2
MF	GO:0017171	serine hydrolase activity	2/474	102/9200	0.970933	0.999991	CsaV3_1G013570/CsaV3_4G035160	CsaV3_1G013570/CsaV3_4G035160	2
MF	GO:0017111	nucleoside-triphosphatase activity	6/474	233/9200	0.983005	0.999991	CsaV3_1G038470/CsaV3_2G029570/CsaV3_3G006130/CsaV3_3G022850/CsaV3_4G007990/CsaV3_6G040470	CsaV3_1G038470/CsaV3_2G029570/CsaV3_3G006130/CsaV3_3G022850/CsaV3_4G007990/CsaV3_6G040470	6
MF	GO:0016462	pyrophosphatase activity	6/474	239/9200	0.98618	0.999991	CsaV3_1G038470/CsaV3_2G029570/CsaV3_3G006130/CsaV3_3G022850/CsaV3_4G007990/CsaV3_6G040470	CsaV3_1G038470/CsaV3_2G029570/CsaV3_3G006130/CsaV3_3G022850/CsaV3_4G007990/CsaV3_6G040470	6
MF	GO:0016874	ligase activity	1/474	81/9200	0.986484	0.999991	CsaV3_6G036910	CsaV3_6G036910	1
MF	GO:0016818	hydrolase activity, acting on acid anhydrides, in phosphorus-containing anhydrides	6/474	244/9200	0.988392	0.999991	CsaV3_1G038470/CsaV3_2G029570/CsaV3_3G006130/CsaV3_3G022850/CsaV3_4G007990/CsaV3_6G040470	CsaV3_1G038470/CsaV3_2G029570/CsaV3_3G006130/CsaV3_3G022850/CsaV3_4G007990/CsaV3_6G040470	6
MF	GO:0016817	hydrolase activity, acting on acid anhydrides	6/474	245/9200	0.988793	0.999991	CsaV3_1G038470/CsaV3_2G029570/CsaV3_3G006130/CsaV3_3G022850/CsaV3_4G007990/CsaV3_6G040470	CsaV3_1G038470/CsaV3_2G029570/CsaV3_3G006130/CsaV3_3G022850/CsaV3_4G007990/CsaV3_6G040470	6
MF	GO:0008194	UDP-glycosyltransferase activity	1/474	85/9200	0.989083	0.999991	CsaV3_2G034660	CsaV3_2G034660	1
MF	GO:0016616	oxidoreductase activity, acting on the CH-OH group of donors, NAD or NADP as acceptor	1/474	87/9200	0.990189	0.999991	CsaV3_6G009990	CsaV3_6G009990	1
MF	GO:0001883	purine nucleoside binding	2/474	150/9200	0.996887	0.999991	CsaV3_2G034570/CsaV3_UNG049340	CsaV3_2G034570/CsaV3_UNG049340	2
MF	GO:0005525	GTP binding	2/474	150/9200	0.996887	0.999991	CsaV3_2G034570/CsaV3_UNG049340	CsaV3_2G034570/CsaV3_UNG049340	2
MF	GO:0032549	ribonucleoside binding	2/474	150/9200	0.996887	0.999991	CsaV3_2G034570/CsaV3_UNG049340	CsaV3_2G034570/CsaV3_UNG049340	2
MF	GO:0032550	purine ribonucleoside binding	2/474	150/9200	0.996887	0.999991	CsaV3_2G034570/CsaV3_UNG049340	CsaV3_2G034570/CsaV3_UNG049340	2
MF	GO:0032561	guanyl ribonucleotide binding	2/474	150/9200	0.996887	0.999991	CsaV3_2G034570/CsaV3_UNG049340	CsaV3_2G034570/CsaV3_UNG049340	2
MF	GO:0001882	nucleoside binding	2/474	151/9200	0.997033	0.999991	CsaV3_2G034570/CsaV3_UNG049340	CsaV3_2G034570/CsaV3_UNG049340	2
MF	GO:0019001	guanyl nucleotide binding	2/474	155/9200	0.99755	0.999991	CsaV3_2G034570/CsaV3_UNG049340	CsaV3_2G034570/CsaV3_UNG049340	2
MF	GO:0003723	RNA binding	4/474	239/9200	0.998661	0.999991	CsaV3_2G012490/CsaV3_3G035380/CsaV3_3G041400/CsaV3_5G032730	CsaV3_2G012490/CsaV3_3G035380/CsaV3_3G041400/CsaV3_5G032730	4
MF	GO:0004175	endopeptidase activity	1/474	127/9200	0.998847	0.999991	CsaV3_5G037560	CsaV3_5G037560	1
MF	GO:0005198	structural molecule activity	1/474	216/9200	0.999991	0.999991	CsaV3_7G024770	CsaV3_7G024770	1

## Sheet: MERoyal_Blue
Category	GOID	Description	GeneRatio	BgRatio	pvalue	padj	geneID	geneName	Count
BP	GO:0030001	metal ion transport	16528	115/6278	0.00893122	0.339805	CsaV3_3G008630/CsaV3_5G002430/CsaV3_5G023740/CsaV3_6G050260	CsaV3_3G008630/CsaV3_5G002430/CsaV3_5G023740/CsaV3_6G050260	4
BP	GO:0016052	carbohydrate catabolic process	16469	40/6278	0.0329824	0.339805	CsaV3_2G001660/CsaV3_2G012230	CsaV3_2G001660/CsaV3_2G012230	2
BP	GO:0017144	drug metabolic process	16497	100/6278	0.0343478	0.339805	CsaV3_4G009580/CsaV3_5G018630/CsaV3_6G021500	CsaV3_4G009580/CsaV3_5G018630/CsaV3_6G021500	3
BP	GO:0005975	carbohydrate metabolic process	16619	446/6278	0.0376917	0.339805	CsaV3_1G032890/CsaV3_1G042560/CsaV3_2G001660/CsaV3_2G012230/CsaV3_5G031470/CsaV3_6G032510/CsaV3_7G002090	CsaV3_1G032890/CsaV3_1G042560/CsaV3_2G001660/CsaV3_2G012230/CsaV3_5G031470/CsaV3_6G032510/CsaV3_7G002090	7
BP	GO:0006812	cation transport	16528	197/6278	0.0515466	0.339805	CsaV3_3G008630/CsaV3_5G002430/CsaV3_5G023740/CsaV3_6G050260	CsaV3_3G008630/CsaV3_5G002430/CsaV3_5G023740/CsaV3_6G050260	4
BP	GO:1901575	organic substance catabolic process	16497	136/6278	0.073033	0.339805	CsaV3_2G001660/CsaV3_2G012230/CsaV3_5G018630	CsaV3_2G001660/CsaV3_2G012230/CsaV3_5G018630	3
BP	GO:0042737	drug catabolic process	16438	1599338	0.0761393	0.339805	CsaV3_5G018630	CsaV3_5G018630	1
BP	GO:0009056	catabolic process	16497	141/6278	0.0794954	0.339805	CsaV3_2G001660/CsaV3_2G012230/CsaV3_5G018630	CsaV3_2G001660/CsaV3_2G012230/CsaV3_5G018630	3
BP	GO:0006022	aminoglycan metabolic process	16438	1599368	0.0827731	0.339805	CsaV3_5G018630	CsaV3_5G018630	1
BP	GO:0006334	nucleosome assembly	16438	1599368	0.0827731	0.339805	CsaV3_4G000180	CsaV3_4G000180	1
BP	GO:0009073	aromatic amino acid family biosynthetic process	16438	1599368	0.0827731	0.339805	CsaV3_6G021500	CsaV3_6G021500	1
BP	GO:0031497	chromatin assembly	16438	1599368	0.0827731	0.339805	CsaV3_4G000180	CsaV3_4G000180	1
BP	GO:0034728	nucleosome organization	16438	1599368	0.0827731	0.339805	CsaV3_4G000180	CsaV3_4G000180	1
BP	GO:0071554	cell wall organization or biogenesis	16469	69/6278	0.0871538	0.339805	CsaV3_5G018630/CsaV3_5G037170	CsaV3_5G018630/CsaV3_5G037170	2
BP	GO:0006066	alcohol metabolic process	16438	13/6278	0.0893603	0.339805	CsaV3_2G001660	CsaV3_2G001660	1
BP	GO:0006323	DNA packaging	16438	13/6278	0.0893603	0.339805	CsaV3_4G000180	CsaV3_4G000180	1
BP	GO:0019751	polyol metabolic process	16438	13/6278	0.0893603	0.339805	CsaV3_2G001660	CsaV3_2G001660	1
BP	GO:0065004	protein-DNA complex assembly	16438	13/6278	0.0893603	0.339805	CsaV3_4G000180	CsaV3_4G000180	1
BP	GO:0071824	protein-DNA complex subunit organization	16438	13/6278	0.0893603	0.339805	CsaV3_4G000180	CsaV3_4G000180	1
BP	GO:0005992	trehalose biosynthetic process	16438	14/6278	0.0959012	0.339805	CsaV3_1G032890	CsaV3_1G032890	1
BP	GO:0006333	chromatin assembly or disassembly	16438	14/6278	0.0959012	0.339805	CsaV3_4G000180	CsaV3_4G000180	1
BP	GO:1901136	carbohydrate derivative catabolic process	16438	14/6278	0.0959012	0.339805	CsaV3_5G018630	CsaV3_5G018630	1
BP	GO:0005991	trehalose metabolic process	16438	15/6278	0.102396	0.339805	CsaV3_1G032890	CsaV3_1G032890	1
BP	GO:0006766	vitamin metabolic process	16438	15/6278	0.102396	0.339805	CsaV3_4G009580	CsaV3_4G009580	1
BP	GO:0006767	water-soluble vitamin metabolic process	16438	15/6278	0.102396	0.339805	CsaV3_4G009580	CsaV3_4G009580	1
BP	GO:0009110	vitamin biosynthetic process	16438	15/6278	0.102396	0.339805	CsaV3_4G009580	CsaV3_4G009580	1
BP	GO:0009605	response to external stimulus	16438	15/6278	0.102396	0.339805	CsaV3_2G004040	CsaV3_2G004040	1
BP	GO:0042364	water-soluble vitamin biosynthetic process	16438	15/6278	0.102396	0.339805	CsaV3_4G009580	CsaV3_4G009580	1
BP	GO:0009057	macromolecule catabolic process	16469	76/6278	0.102649	0.339805	CsaV3_2G012230/CsaV3_5G018630	CsaV3_2G012230/CsaV3_5G018630	2
BP	GO:0046351	disaccharide biosynthetic process	16438	16/6278	0.108845	0.348306	CsaV3_1G032890	CsaV3_1G032890	1
BP	GO:1901615	organic hydroxy compound metabolic process	16438	17/6278	0.115249	0.356902	CsaV3_2G001660	CsaV3_2G001660	1
BP	GO:0044282	small molecule catabolic process	16438	18/6278	0.121609	0.357633	CsaV3_2G001660	CsaV3_2G001660	1
BP	GO:0009072	aromatic amino acid family metabolic process	16438	19/6278	0.127923	0.357633	CsaV3_6G021500	CsaV3_6G021500	1
BP	GO:0009312	oligosaccharide biosynthetic process	16438	19/6278	0.127923	0.357633	CsaV3_1G032890	CsaV3_1G032890	1
BP	GO:0006811	ion transport	16528	280/6278	0.139286	0.357633	CsaV3_3G008630/CsaV3_5G002430/CsaV3_5G023740/CsaV3_6G050260	CsaV3_3G008630/CsaV3_5G002430/CsaV3_5G023740/CsaV3_6G050260	4
BP	GO:0071103	DNA conformation change	16438	21/6278	0.140419	0.357633	CsaV3_4G000180	CsaV3_4G000180	1
BP	GO:0007165	signal transduction	16497	184/6278	0.144266	0.357633	CsaV3_1G039330/CsaV3_2G005060/CsaV3_2G016260	CsaV3_1G039330/CsaV3_2G005060/CsaV3_2G016260	3
BP	GO:0023052	signaling	16497	184/6278	0.144266	0.357633	CsaV3_1G039330/CsaV3_2G005060/CsaV3_2G016260	CsaV3_1G039330/CsaV3_2G005060/CsaV3_2G016260	3
BP	GO:0044262	cellular carbohydrate metabolic process	16469	96/6278	0.15043	0.357633	CsaV3_1G032890/CsaV3_2G001660	CsaV3_1G032890/CsaV3_2G001660	2
BP	GO:0001522	pseudouridine synthesis	16438	23/6278	0.152739	0.357633	CsaV3_1G045610	CsaV3_1G045610	1
BP	GO:0005984	disaccharide metabolic process	16438	23/6278	0.152739	0.357633	CsaV3_1G032890	CsaV3_1G032890	1
BP	GO:0055085	transmembrane transport	16558	409/6278	0.166651	0.380917	CsaV3_2G012790/CsaV3_2G024450/CsaV3_4G033600/CsaV3_6G050260/CsaV3_7G023340	CsaV3_2G012790/CsaV3_2G024450/CsaV3_4G033600/CsaV3_6G050260/CsaV3_7G023340	5
BP	GO:0009311	oligosaccharide metabolic process	16438	26/6278	0.170897	0.381538	CsaV3_1G032890	CsaV3_1G032890	1
BP	GO:0006325	chromatin organization	16438	28/6278	0.18279	0.398815	CsaV3_4G000180	CsaV3_4G000180	1
BP	GO:0007154	cell communication	16497	222/6278	0.212021	0.44421	CsaV3_1G039330/CsaV3_2G005060/CsaV3_2G016260	CsaV3_1G039330/CsaV3_2G005060/CsaV3_2G016260	3
BP	GO:0044248	cellular catabolic process	16469	121/6278	0.214893	0.44421	CsaV3_2G001660/CsaV3_5G018630	CsaV3_2G001660/CsaV3_5G018630	2
BP	GO:0009451	RNA modification	16438	34/6278	0.217478	0.44421	CsaV3_1G045610	CsaV3_1G045610	1
BP	GO:1901607	alpha-amino acid biosynthetic process	16438	36/6278	0.228717	0.452142	CsaV3_6G021500	CsaV3_6G021500	1
BP	GO:0000160	phosphorelay signal transduction system	16438	40/6278	0.250725	0.452142	CsaV3_1G039330	CsaV3_1G039330	1
BP	GO:0034622	cellular protein-containing complex assembly	16438	41/6278	0.25613	0.452142	CsaV3_4G000180	CsaV3_4G000180	1
BP	GO:0051716	cellular response to stimulus	16497	249/6278	0.263845	0.452142	CsaV3_1G039330/CsaV3_2G005060/CsaV3_2G016260	CsaV3_1G039330/CsaV3_2G005060/CsaV3_2G016260	3
BP	GO:0006855	drug transmembrane transport	16438	44/6278	0.272118	0.452142	CsaV3_4G033600	CsaV3_4G033600	1
BP	GO:0015893	drug transport	16438	44/6278	0.272118	0.452142	CsaV3_4G033600	CsaV3_4G033600	1
BP	GO:0042493	response to drug	16438	44/6278	0.272118	0.452142	CsaV3_4G033600	CsaV3_4G033600	1
BP	GO:0051704	multi-organism process	16438	44/6278	0.272118	0.452142	CsaV3_2G004040	CsaV3_2G004040	1
BP	GO:0008652	cellular amino acid biosynthetic process	16438	45/6278	0.277372	0.452142	CsaV3_6G021500	CsaV3_6G021500	1
BP	GO:0051276	chromosome organization	16438	45/6278	0.277372	0.452142	CsaV3_4G000180	CsaV3_4G000180	1
BP	GO:0044283	small molecule biosynthetic process	16469	145/6278	0.278885	0.452142	CsaV3_4G009580/CsaV3_6G021500	CsaV3_4G009580/CsaV3_6G021500	2
BP	GO:0042545	cell wall modification	16438	46/6278	0.282589	0.452142	CsaV3_5G037170	CsaV3_5G037170	1
BP	GO:0065003	protein-containing complex assembly	16438	46/6278	0.282589	0.452142	CsaV3_4G000180	CsaV3_4G000180	1
BP	GO:1901605	alpha-amino acid metabolic process	16438	49/6278	0.29802	0.469016	CsaV3_6G021500	CsaV3_6G021500	1
BP	GO:0009607	response to biotic stimulus	16438	51/6278	0.308127	0.4771	CsaV3_2G004040	CsaV3_2G004040	1
BP	GO:0043933	protein-containing complex subunit organization	16438	54/6278	0.323021	0.492222	CsaV3_4G000180	CsaV3_4G000180	1
BP	GO:0045229	external encapsulating structure organization	16438	57/6278	0.337601	0.498611	CsaV3_5G037170	CsaV3_5G037170	1
BP	GO:0071555	cell wall organization	16438	57/6278	0.337601	0.498611	CsaV3_5G037170	CsaV3_5G037170	1
BP	GO:0034637	cellular carbohydrate biosynthetic process	16438	61/6278	0.356565	0.51864	CsaV3_1G032890	CsaV3_1G032890	1
BP	GO:0016043	cellular component organization	16469	183/6278	0.379309	0.532775	CsaV3_4G000180/CsaV3_5G037170	CsaV3_4G000180/CsaV3_5G037170	2
BP	GO:0006952	defense response	16438	67/6278	0.384019	0.532775	CsaV3_2G004040	CsaV3_2G004040	1
BP	GO:0016051	carbohydrate biosynthetic process	16438	68/6278	0.388482	0.532775	CsaV3_1G032890	CsaV3_1G032890	1
BP	GO:1901565	organonitrogen compound catabolic process	16438	68/6278	0.388482	0.532775	CsaV3_5G018630	CsaV3_5G018630	1
BP	GO:0022607	cellular component assembly	16438	70/6278	0.397313	0.537212	CsaV3_4G000180	CsaV3_4G000180	1
BP	GO:0005976	polysaccharide metabolic process	16438	74/6278	0.414603	0.552804	CsaV3_2G012230	CsaV3_2G012230	1
BP	GO:0006996	organelle organization	16438	84/6278	0.455733	0.59543	CsaV3_4G000180	CsaV3_4G000180	1
BP	GO:0071840	cellular component organization or biogenesis	16469	218/6278	0.466792	0.59543	CsaV3_4G000180/CsaV3_5G037170	CsaV3_4G000180/CsaV3_5G037170	2
BP	GO:0044281	small molecule metabolic process	16497	353/6278	0.468277	0.59543	CsaV3_2G001660/CsaV3_4G009580/CsaV3_6G021500	CsaV3_2G001660/CsaV3_4G009580/CsaV3_6G021500	3
BP	GO:0006979	response to oxidative stress	16438	88/6278	0.471382	0.59543	CsaV3_6G006890	CsaV3_6G006890	1
BP	GO:0044085	cellular component biogenesis	16438	105/6278	0.533122	0.659879	CsaV3_4G000180	CsaV3_4G000180	1
BP	GO:0042221	response to chemical	16438	107/6278	0.539905	0.659879	CsaV3_4G033600	CsaV3_4G033600	1
BP	GO:0006520	cellular amino acid metabolic process	16438	110/6278	0.549899	0.659879	CsaV3_6G021500	CsaV3_6G021500	1
BP	GO:0035556	intracellular signal transduction	16438	110/6278	0.549899	0.659879	CsaV3_1G039330	CsaV3_1G039330	1
BP	GO:0016053	organic acid biosynthetic process	16438	120/6278	0.581702	0.681017	CsaV3_6G021500	CsaV3_6G021500	1
BP	GO:0046394	carboxylic acid biosynthetic process	16438	120/6278	0.581702	0.681017	CsaV3_6G021500	CsaV3_6G021500	1
BP	GO:0033036	macromolecule localization	16438	129/6278	0.608439	0.703737	CsaV3_5G034220	CsaV3_5G034220	1
BP	GO:0006950	response to stress	16469	289/6278	0.620579	0.709233	CsaV3_2G004040/CsaV3_6G006890	CsaV3_2G004040/CsaV3_6G006890	2
BP	GO:0071702	organic substance transport	16438	150/6278	0.664494	0.750487	CsaV3_5G034220	CsaV3_5G034220	1
BP	GO:1901566	organonitrogen compound biosynthetic process	16497	488/6278	0.690955	0.767092	CsaV3_4G009580/CsaV3_5G023320/CsaV3_6G021500	CsaV3_4G009580/CsaV3_5G023320/CsaV3_6G021500	3
BP	GO:1901135	carbohydrate derivative metabolic process	16438	163/6278	0.695177	0.767092	CsaV3_5G018630	CsaV3_5G018630	1
BP	GO:0019752	carboxylic acid metabolic process	16438	222/6278	0.803265	0.870448	CsaV3_6G021500	CsaV3_6G021500	1
BP	GO:0043436	oxoacid metabolic process	16438	230/6278	0.814666	0.870448	CsaV3_6G021500	CsaV3_6G021500	1
BP	GO:0006082	organic acid metabolic process	16438	231/6278	0.816045	0.870448	CsaV3_6G021500	CsaV3_6G021500	1
BP	GO:0006508	proteolysis	16438	256/6278	0.847437	0.887489	CsaV3_1G045370	CsaV3_1G045370	1
BP	GO:0006412	translation	16438	271/6278	0.863689	0.887489	CsaV3_5G023320	CsaV3_5G023320	1
BP	GO:0043043	peptide biosynthetic process	16438	274/6278	0.86673	0.887489	CsaV3_5G023320	CsaV3_5G023320	1
BP	GO:0006518	peptide metabolic process	16438	281/6278	0.87357	0.887489	CsaV3_5G023320	CsaV3_5G023320	1
BP	GO:0043604	amide biosynthetic process	16438	286/6278	0.878245	0.887489	CsaV3_5G023320	CsaV3_5G023320	1
BP	GO:0043603	cellular amide metabolic process	16438	297/6278	0.887942	0.887942	CsaV3_5G023320	CsaV3_5G023320	1
CC	GO:0000785	chromatin	44197	114596	0.0911201	0.54672	CsaV3_4G000180	CsaV3_4G000180	1
CC	GO:0032993	protein-DNA complex	44197	114596	0.0911201	0.54672	CsaV3_4G000180	CsaV3_4G000180	1
CC	GO:0044815	DNA packaging complex	44197	114596	0.0911201	0.54672	CsaV3_4G000180	CsaV3_4G000180	1
CC	GO:0005634	nucleus	44348	374/2213	0.128814	0.579661	CsaV3_1G001430/CsaV3_1G009750/CsaV3_2G024800/CsaV3_3G036970/CsaV3_4G000180/CsaV3_5G005600	CsaV3_1G001430/CsaV3_1G009750/CsaV3_2G024800/CsaV3_3G036970/CsaV3_4G000180/CsaV3_5G005600	6
CC	GO:0044427	chromosomal part	44197	23/2213	0.197803	0.71209	CsaV3_4G000180	CsaV3_4G000180	1
CC	GO:0005694	chromosome	44197	44/2213	0.345364	0.947427	CsaV3_4G000180	CsaV3_4G000180	1
CC	GO:0005618	cell wall	44197	70/2213	0.492424	0.947427	CsaV3_5G037170	CsaV3_5G037170	1
CC	GO:0030312	external encapsulating structure	44197	70/2213	0.492424	0.947427	CsaV3_5G037170	CsaV3_5G037170	1
CC	GO:1902494	catalytic complex	44197	102/2213	0.630479	0.947427	CsaV3_2G016260	CsaV3_2G016260	1
CC	GO:0071944	cell periphery	44197	112/2213	0.665708	0.947427	CsaV3_5G037170	CsaV3_5G037170	1
CC	GO:0043228	non-membrane-bounded organelle	44228	282/2213	0.769098	0.947427	CsaV3_4G000180/CsaV3_5G023320	CsaV3_4G000180/CsaV3_5G023320	2
CC	GO:0043232	intracellular non-membrane-bounded organelle	44228	282/2213	0.769098	0.947427	CsaV3_4G000180/CsaV3_5G023320	CsaV3_4G000180/CsaV3_5G023320	2
CC	GO:0005840	ribosome	44197	198/2213	0.861615	0.947427	CsaV3_5G023320	CsaV3_5G023320	1
CC	GO:0044422	organelle part	44197	202/2213	0.867298	0.947427	CsaV3_4G000180	CsaV3_4G000180	1
CC	GO:0044446	intracellular organelle part	44197	202/2213	0.867298	0.947427	CsaV3_4G000180	CsaV3_4G000180	1
CC	GO:0005737	cytoplasm	44256	497/2213	0.882887	0.947427	CsaV3_2G001660/CsaV3_5G023320/CsaV3_5G034220	CsaV3_2G001660/CsaV3_5G023320/CsaV3_5G034220	3
CC	GO:1990904	ribonucleoprotein complex	44197	224/2213	0.894792	0.947427	CsaV3_5G023320	CsaV3_5G023320	1
CC	GO:0044444	cytoplasmic part	44197	421/2213	0.988366	0.988366	CsaV3_5G023320	CsaV3_5G023320	1
MF	GO:0016836	hydro-lyase activity	29252	27/9200	0.0227726	0.602611	CsaV3_3G042440/CsaV3_6G021500	CsaV3_3G042440/CsaV3_6G021500	2
MF	GO:0001871	pattern binding	29252	29/9200	0.0260488	0.602611	CsaV3_2G006830/CsaV3_4G025270	CsaV3_2G006830/CsaV3_4G025270	2
MF	GO:0030247	polysaccharide binding	29252	29/9200	0.0260488	0.602611	CsaV3_2G006830/CsaV3_4G025270	CsaV3_2G006830/CsaV3_4G025270	2
MF	GO:0004553	hydrolase activity, hydrolyzing O-glycosyl compounds	29373	296/9200	0.0435651	0.602611	CsaV3_1G042560/CsaV3_2G012230/CsaV3_5G018630/CsaV3_5G031470/CsaV3_6G032510/CsaV3_7G002090	CsaV3_1G042560/CsaV3_2G012230/CsaV3_5G018630/CsaV3_5G031470/CsaV3_6G032510/CsaV3_7G002090	6
MF	GO:0016798	hydrolase activity, acting on glycosyl bonds	29373	313/9200	0.0544707	0.602611	CsaV3_1G042560/CsaV3_2G012230/CsaV3_5G018630/CsaV3_5G031470/CsaV3_6G032510/CsaV3_7G002090	CsaV3_1G042560/CsaV3_2G012230/CsaV3_5G018630/CsaV3_5G031470/CsaV3_6G032510/CsaV3_7G002090	6
MF	GO:0016701	oxidoreductase activity, acting on single donors with incorporation of molecular oxygen	29252	54/9200	0.0799671	0.602611	CsaV3_1G032340/CsaV3_2G001660	CsaV3_1G032340/CsaV3_2G001660	2
MF	GO:0004871	signal transducer activity	29252	55/9200	0.0825316	0.602611	CsaV3_1G039330/CsaV3_2G026670	CsaV3_1G039330/CsaV3_2G026670	2
MF	GO:0043531	ADP binding	29252	55/9200	0.0825316	0.602611	CsaV3_2G004790/CsaV3_2G005060	CsaV3_2G004790/CsaV3_2G005060	2
MF	GO:0004616	phosphogluconate dehydrogenase (decarboxylating) activity	29221	2666546	0.0836709	0.602611	CsaV3_3G019040	CsaV3_3G019040	1
MF	GO:0046983	protein dimerization activity	29342	271/9200	0.0866085	0.602611	CsaV3_1G009750/CsaV3_2G026190/CsaV3_5G005600/CsaV3_5G024030/CsaV3_UNG063480	CsaV3_1G009750/CsaV3_2G026190/CsaV3_5G005600/CsaV3_5G024030/CsaV3_UNG063480	5
MF	GO:0004650	polygalacturonase activity	29252	57/9200	0.0877356	0.602611	CsaV3_5G031470/CsaV3_7G002090	CsaV3_5G031470/CsaV3_7G002090	2
MF	GO:0016829	lyase activity	29281	122/9200	0.089794	0.602611	CsaV3_3G042440/CsaV3_4G009580/CsaV3_6G021500	CsaV3_3G042440/CsaV3_4G009580/CsaV3_6G021500	3
MF	GO:0016835	carbon-oxygen lyase activity	29252	58/9200	0.0903738	0.602611	CsaV3_3G042440/CsaV3_6G021500	CsaV3_3G042440/CsaV3_6G021500	2
MF	GO:0016160	amylase activity	29221	2666577	0.0916477	0.602611	CsaV3_2G012230	CsaV3_2G012230	1
MF	GO:0008289	lipid binding	29252	61/9200	0.0984266	0.602611	CsaV3_2G016040/CsaV3_5G034220	CsaV3_2G016040/CsaV3_5G034220	2
MF	GO:0033897	ribonuclease T2 activity	29221	2666607	0.0995559	0.602611	CsaV3_7G026270	CsaV3_7G026270	1
MF	GO:0016892	endoribonuclease activity, producing 3'-phosphomonoesters	29221	13/9200	0.107396	0.602611	CsaV3_7G026270	CsaV3_7G026270	1
MF	GO:0016894	endonuclease activity, active with either ribo- or deoxyribonucleic acids and producing 3'-phosphomonoesters	29221	13/9200	0.107396	0.602611	CsaV3_7G026270	CsaV3_7G026270	1
MF	GO:0008374	O-acyltransferase activity	29221	16/9200	0.130514	0.628293	CsaV3_7G005960	CsaV3_7G005960	1
MF	GO:0009982	pseudouridine synthase activity	29221	22/9200	0.174991	0.628293	CsaV3_1G045610	CsaV3_1G045610	1
MF	GO:0004857	enzyme inhibitor activity	29252	88/9200	0.177972	0.628293	CsaV3_3G010420/CsaV3_5G037170	CsaV3_3G010420/CsaV3_5G037170	2
MF	GO:0004521	endoribonuclease activity	29221	24/9200	0.189312	0.628293	CsaV3_7G026270	CsaV3_7G026270	1
MF	GO:0004970	ionotropic glutamate receptor activity	29221	24/9200	0.189312	0.628293	CsaV3_2G026670	CsaV3_2G026670	1
MF	GO:0005230	extracellular ligand-gated ion channel activity	29221	24/9200	0.189312	0.628293	CsaV3_2G026670	CsaV3_2G026670	1
MF	GO:0008066	glutamate receptor activity	29221	24/9200	0.189312	0.628293	CsaV3_2G026670	CsaV3_2G026670	1
MF	GO:0015276	ligand-gated ion channel activity	29221	24/9200	0.189312	0.628293	CsaV3_2G026670	CsaV3_2G026670	1
MF	GO:0022824	transmitter-gated ion channel activity	29221	24/9200	0.189312	0.628293	CsaV3_2G026670	CsaV3_2G026670	1
MF	GO:0022834	ligand-gated channel activity	29221	24/9200	0.189312	0.628293	CsaV3_2G026670	CsaV3_2G026670	1
MF	GO:0022835	transmitter-gated channel activity	29221	24/9200	0.189312	0.628293	CsaV3_2G026670	CsaV3_2G026670	1
MF	GO:0030594	neurotransmitter receptor activity	29221	24/9200	0.189312	0.628293	CsaV3_2G026670	CsaV3_2G026670	1
MF	GO:0004888	transmembrane signaling receptor activity	29221	26/9200	0.203387	0.628293	CsaV3_2G026670	CsaV3_2G026670	1
MF	GO:0022857	transmembrane transporter activity	29342	363/9200	0.207953	0.628293	CsaV3_2G012790/CsaV3_2G026670/CsaV3_4G033600/CsaV3_6G050260/CsaV3_7G023340	CsaV3_2G012790/CsaV3_2G026670/CsaV3_4G033600/CsaV3_6G050260/CsaV3_7G023340	5
MF	GO:0004519	endonuclease activity	29221	29/9200	0.224048	0.628293	CsaV3_7G026270	CsaV3_7G026270	1
MF	GO:0004540	ribonuclease activity	29221	29/9200	0.224048	0.628293	CsaV3_7G026270	CsaV3_7G026270	1
MF	GO:0022836	gated channel activity	29221	30/9200	0.230817	0.628293	CsaV3_2G026670	CsaV3_2G026670	1
MF	GO:0022839	ion gated channel activity	29221	30/9200	0.230817	0.628293	CsaV3_2G026670	CsaV3_2G026670	1
MF	GO:0005215	transporter activity	29373	479/9200	0.236844	0.628293	CsaV3_2G012790/CsaV3_2G026670/CsaV3_4G033600/CsaV3_5G034220/CsaV3_6G050260/CsaV3_7G023340	CsaV3_2G012790/CsaV3_2G026670/CsaV3_4G033600/CsaV3_5G034220/CsaV3_6G050260/CsaV3_7G023340	6
MF	GO:0016866	intramolecular transferase activity	29221	32/9200	0.24418	0.628293	CsaV3_1G045610	CsaV3_1G045610	1
MF	GO:0030246	carbohydrate binding	29252	112/9200	0.254517	0.628293	CsaV3_2G006830/CsaV3_4G025270	CsaV3_2G006830/CsaV3_4G025270	2
MF	GO:0003924	GTPase activity	29221	36/9200	0.270222	0.628293	CsaV3_3G043190	CsaV3_3G043190	1
MF	GO:0038023	signaling receptor activity	29221	36/9200	0.270222	0.628293	CsaV3_2G026670	CsaV3_2G026670	1
MF	GO:0060089	molecular transducer activity	29221	36/9200	0.270222	0.628293	CsaV3_2G026670	CsaV3_2G026670	1
MF	GO:0045735	nutrient reservoir activity	29221	37/9200	0.276593	0.628293	CsaV3_6G052460	CsaV3_6G052460	1
MF	GO:0030234	enzyme regulator activity	29252	123/9200	0.290069	0.628293	CsaV3_3G010420/CsaV3_5G037170	CsaV3_3G010420/CsaV3_5G037170	2
MF	GO:0016830	carbon-carbon lyase activity	29221	41/9200	0.301531	0.628293	CsaV3_4G009580	CsaV3_4G009580	1
MF	GO:0016702	oxidoreductase activity, acting on single donors with incorporation of molecular oxygen, incorporation of two atoms of oxygen	29221	43/9200	0.31368	0.628293	CsaV3_1G032340	CsaV3_1G032340	1
MF	GO:0015238	drug transmembrane transporter activity	29221	45/9200	0.325621	0.628293	CsaV3_4G033600	CsaV3_4G033600	1
MF	GO:0051213	dioxygenase activity	29221	45/9200	0.325621	0.628293	CsaV3_1G032340	CsaV3_1G032340	1
MF	GO:0030599	pectinesterase activity	29221	46/9200	0.331514	0.628293	CsaV3_5G037170	CsaV3_5G037170	1
MF	GO:0098772	molecular function regulator	29252	136/9200	0.331833	0.628293	CsaV3_3G010420/CsaV3_5G037170	CsaV3_3G010420/CsaV3_5G037170	2
MF	GO:0005507	copper ion binding	29221	48/9200	0.343148	0.628293	CsaV3_UNG144100	CsaV3_UNG144100	1
MF	GO:0003723	RNA binding	29281	239/9200	0.344822	0.628293	CsaV3_1G045610/CsaV3_5G023320/CsaV3_7G026270	CsaV3_1G045610/CsaV3_5G023320/CsaV3_7G026270	3
MF	GO:0005216	ion channel activity	29221	50/9200	0.354581	0.628293	CsaV3_2G026670	CsaV3_2G026670	1
MF	GO:0015267	channel activity	29221	50/9200	0.354581	0.628293	CsaV3_2G026670	CsaV3_2G026670	1
MF	GO:0022803	passive transmembrane transporter activity	29221	50/9200	0.354581	0.628293	CsaV3_2G026670	CsaV3_2G026670	1
MF	GO:0022838	substrate-specific channel activity	29221	50/9200	0.354581	0.628293	CsaV3_2G026670	CsaV3_2G026670	1
MF	GO:0046873	metal ion transmembrane transporter activity	29221	50/9200	0.354581	0.628293	CsaV3_6G050260	CsaV3_6G050260	1
MF	GO:0051287	NAD binding	29221	55/9200	0.382313	0.665753	CsaV3_3G019040	CsaV3_3G019040	1
MF	GO:0030170	pyridoxal phosphate binding	29221	58/9200	0.398384	0.670613	CsaV3_6G018420	CsaV3_6G018420	1
MF	GO:0070279	vitamin B6 binding	29221	58/9200	0.398384	0.670613	CsaV3_6G018420	CsaV3_6G018420	1
MF	GO:0008234	cysteine-type peptidase activity	29221	61/9200	0.414042	0.682843	CsaV3_1G045370	CsaV3_1G045370	1
MF	GO:0004518	nuclease activity	29221	62/9200	0.419171	0.682843	CsaV3_7G026270	CsaV3_7G026270	1
MF	GO:0052689	carboxylic ester hydrolase activity	29221	65/9200	0.434295	0.69625	CsaV3_5G037170	CsaV3_5G037170	1
MF	GO:0019842	vitamin binding	29221	70/9200	0.458641	0.723792	CsaV3_6G018420	CsaV3_6G018420	1
MF	GO:0015297	antiporter activity	29221	75/9200	0.481951	0.748878	CsaV3_4G033600	CsaV3_4G033600	1
MF	GO:0015291	secondary active transmembrane transporter activity	29221	79/9200	0.499884	0.764974	CsaV3_4G033600	CsaV3_4G033600	1
MF	GO:0016874	ligase activity	29221	81/9200	0.508619	0.766724	CsaV3_3G004900	CsaV3_3G004900	1
MF	GO:0015318	inorganic molecular entity transmembrane transporter activity	29252	198/9200	0.516845	0.767667	CsaV3_2G026670/CsaV3_6G050260	CsaV3_2G026670/CsaV3_6G050260	2
MF	GO:0016616	oxidoreductase activity, acting on the CH-OH group of donors, NAD or NADP as acceptor	29221	87/9200	0.53393	0.78155	CsaV3_3G019040	CsaV3_3G019040	1
MF	GO:0015075	ion transmembrane transporter activity	29252	218/9200	0.569171	0.811218	CsaV3_2G026670/CsaV3_6G050260	CsaV3_2G026670/CsaV3_6G050260	2
MF	GO:0004601	peroxidase activity	29221	99/9200	0.580752	0.811218	CsaV3_6G006890	CsaV3_6G006890	1
MF	GO:0016853	isomerase activity	29221	100/9200	0.584437	0.811218	CsaV3_1G045610	CsaV3_1G045610	1
MF	GO:0016684	oxidoreductase activity, acting on peroxide as acceptor	29221	101/9200	0.588091	0.811218	CsaV3_6G006890	CsaV3_6G006890	1
MF	GO:0005506	iron ion binding	29252	230/9200	0.598588	0.811218	CsaV3_2G001660/CsaV3_2G027780	CsaV3_2G001660/CsaV3_2G027780	2
MF	GO:0016209	antioxidant activity	29221	105/9200	0.602389	0.811218	CsaV3_6G006890	CsaV3_6G006890	1
MF	GO:0016747	transferase activity, transferring acyl groups other than amino-acyl groups	29221	113/9200	0.629532	0.827724	CsaV3_7G005960	CsaV3_7G005960	1
MF	GO:0003700	DNA binding transcription factor activity	29281	374/9200	0.637301	0.827724	CsaV3_1G009750/CsaV3_4G035380/CsaV3_5G005600	CsaV3_1G009750/CsaV3_4G035380/CsaV3_5G005600	3
MF	GO:0022890	inorganic cation transmembrane transporter activity	29221	116/9200	0.639232	0.827724	CsaV3_6G050260	CsaV3_6G050260	1
MF	GO:0022804	active transmembrane transporter activity	29221	127/9200	0.6727	0.836363	CsaV3_4G033600	CsaV3_4G033600	1
MF	GO:0140110	transcription regulator activity	29281	397/9200	0.677443	0.836363	CsaV3_1G009750/CsaV3_4G035380/CsaV3_5G005600	CsaV3_1G009750/CsaV3_4G035380/CsaV3_5G005600	3
MF	GO:0005509	calcium ion binding	29221	134/9200	0.692381	0.836363	CsaV3_6G006120	CsaV3_6G006120	1
MF	GO:0008324	cation transmembrane transporter activity	29221	135/9200	0.695095	0.836363	CsaV3_6G050260	CsaV3_6G050260	1
MF	GO:0016788	hydrolase activity, acting on ester bonds	29252	275/9200	0.695589	0.836363	CsaV3_5G037170/CsaV3_7G026270	CsaV3_5G037170/CsaV3_7G026270	2
MF	GO:0050662	coenzyme binding	29252	275/9200	0.695589	0.836363	CsaV3_3G019040/CsaV3_6G018420	CsaV3_3G019040/CsaV3_6G018420	2
MF	GO:0016614	oxidoreductase activity, acting on CH-OH group of donors	29221	142/9200	0.713446	0.846303	CsaV3_3G019040	CsaV3_3G019040	1
MF	GO:0140098	catalytic activity, acting on RNA	29221	148/9200	0.728303	0.846303	CsaV3_7G026270	CsaV3_7G026270	1
MF	GO:0016746	transferase activity, transferring acyl groups	29221	149/9200	0.730705	0.846303	CsaV3_7G005960	CsaV3_7G005960	1
MF	GO:0020037	heme binding	29252	299/9200	0.739039	0.846303	CsaV3_2G027780/CsaV3_6G006890	CsaV3_2G027780/CsaV3_6G006890	2
MF	GO:0046906	tetrapyrrole binding	29252	303/9200	0.745752	0.846303	CsaV3_2G027780/CsaV3_6G006890	CsaV3_2G027780/CsaV3_6G006890	2
MF	GO:0008270	zinc ion binding	29252	335/9200	0.794368	0.891457	CsaV3_3G042440/CsaV3_5G028480	CsaV3_3G042440/CsaV3_5G028480	2
MF	GO:0043565	sequence-specific DNA binding	29221	188/9200	0.809656	0.89863	CsaV3_4G035380	CsaV3_4G035380	1
MF	GO:0003735	structural constituent of ribosome	29221	201/9200	0.830503	0.908179	CsaV3_5G023320	CsaV3_5G023320	1
MF	GO:0005198	structural molecule activity	29221	216/9200	0.851767	0.908179	CsaV3_5G023320	CsaV3_5G023320	1
MF	GO:0017111	nucleoside-triphosphatase activity	29221	233/9200	0.872694	0.908179	CsaV3_3G043190	CsaV3_3G043190	1
MF	GO:0016705	oxidoreductase activity, acting on paired donors, with incorporation or reduction of molecular oxygen	29221	238/9200	0.878274	0.908179	CsaV3_2G027780	CsaV3_2G027780	1
MF	GO:0016462	pyrophosphatase activity	29221	239/9200	0.87936	0.908179	CsaV3_3G043190	CsaV3_3G043190	1
MF	GO:0016818	hydrolase activity, acting on acid anhydrides, in phosphorus-containing anhydrides	29221	244/9200	0.884651	0.908179	CsaV3_3G043190	CsaV3_3G043190	1
MF	GO:0016817	hydrolase activity, acting on acid anhydrides	29221	245/9200	0.885682	0.908179	CsaV3_3G043190	CsaV3_3G043190	1
MF	GO:0070011	peptidase activity, acting on L-amino acid peptides	29221	250/9200	0.890699	0.908179	CsaV3_1G045370	CsaV3_1G045370	1
MF	GO:0008233	peptidase activity	29221	259/9200	0.899187	0.908179	CsaV3_1G045370	CsaV3_1G045370	1
MF	GO:0016757	transferase activity, transferring glycosyl groups	29221	302/9200	0.931566	0.931566	CsaV3_6G000050	CsaV3_6G000050	1

## Sheet: MEDark_Grey GO Enrichment
Category	GOID	Description	GeneRatio	BgRatio	pvalue	padj	geneID	geneName	Count
BP	GO:0009733	response to auxin	14277	40/6278	0.0252836	0.634225	CsaV3_1G009830/CsaV3_3G045730	CsaV3_1G009830/CsaV3_3G045730	2
BP	GO:0009719	response to endogenous stimulus	14277	55/6278	0.0454219	0.634225	CsaV3_1G009830/CsaV3_3G045730	CsaV3_1G009830/CsaV3_3G045730	2
BP	GO:0009725	response to hormone	14277	55/6278	0.0454219	0.634225	CsaV3_1G009830/CsaV3_3G045730	CsaV3_1G009830/CsaV3_3G045730	2
BP	GO:0010033	response to organic substance	14277	55/6278	0.0454219	0.634225	CsaV3_1G009830/CsaV3_3G045730	CsaV3_1G009830/CsaV3_3G045730	2
BP	GO:0006835	dicarboxylic acid transport	14246	13/6278	0.0778873	0.634225	CsaV3_1G043740	CsaV3_1G043740	1
BP	GO:0015740	C4-dicarboxylate transport	14246	13/6278	0.0778873	0.634225	CsaV3_1G043740	CsaV3_1G043740	1
BP	GO:0015743	malate transport	14246	13/6278	0.0778873	0.634225	CsaV3_1G043740	CsaV3_1G043740	1
BP	GO:0001522	pseudouridine synthesis	14246	23/6278	0.133747	0.661091	CsaV3_UNG004060	CsaV3_UNG004060	1
BP	GO:0005975	carbohydrate metabolic process	14366	446/6278	0.140014	0.661091	CsaV3_1G042480/CsaV3_3G017650/CsaV3_3G043070/CsaV3_4G001500/CsaV3_5G002300	CsaV3_1G042480/CsaV3_3G017650/CsaV3_3G043070/CsaV3_4G001500/CsaV3_5G002300	5
BP	GO:0042221	response to chemical	14277	107/6278	0.142252	0.661091	CsaV3_1G009830/CsaV3_3G045730	CsaV3_1G009830/CsaV3_3G045730	2
BP	GO:0009308	amine metabolic process	14246	28/6278	0.160426	0.661091	CsaV3_1G040500	CsaV3_1G040500	1
BP	GO:0015711	organic anion transport	14246	30/6278	0.170872	0.661091	CsaV3_1G043740	CsaV3_1G043740	1
BP	GO:0015849	organic acid transport	14246	30/6278	0.170872	0.661091	CsaV3_1G043740	CsaV3_1G043740	1
BP	GO:0046942	carboxylic acid transport	14246	30/6278	0.170872	0.661091	CsaV3_1G043740	CsaV3_1G043740	1
BP	GO:0009451	RNA modification	14246	34/6278	0.191386	0.661091	CsaV3_UNG004060	CsaV3_UNG004060	1
BP	GO:0006629	lipid metabolic process	14305	249/6278	0.200196	0.661091	CsaV3_4G001640/CsaV3_4G001670/CsaV3_6G024110	CsaV3_4G001640/CsaV3_4G001670/CsaV3_6G024110	3
BP	GO:0006631	fatty acid metabolic process	14246	50/6278	0.268606	0.661091	CsaV3_6G024110	CsaV3_6G024110	1
BP	GO:0046034	ATP metabolic process	14246	54/6278	0.286759	0.661091	CsaV3_5G020410	CsaV3_5G020410	1
BP	GO:0009126	purine nucleoside monophosphate metabolic process	14246	57/6278	0.300085	0.661091	CsaV3_5G020410	CsaV3_5G020410	1
BP	GO:0009144	purine nucleoside triphosphate metabolic process	14246	57/6278	0.300085	0.661091	CsaV3_5G020410	CsaV3_5G020410	1
BP	GO:0009161	ribonucleoside monophosphate metabolic process	14246	57/6278	0.300085	0.661091	CsaV3_5G020410	CsaV3_5G020410	1
BP	GO:0009167	purine ribonucleoside monophosphate metabolic process	14246	57/6278	0.300085	0.661091	CsaV3_5G020410	CsaV3_5G020410	1
BP	GO:0009199	ribonucleoside triphosphate metabolic process	14246	57/6278	0.300085	0.661091	CsaV3_5G020410	CsaV3_5G020410	1
BP	GO:0009205	purine ribonucleoside triphosphate metabolic process	14246	57/6278	0.300085	0.661091	CsaV3_5G020410	CsaV3_5G020410	1
BP	GO:0009123	nucleoside monophosphate metabolic process	14246	58/6278	0.304473	0.661091	CsaV3_5G020410	CsaV3_5G020410	1
BP	GO:0009141	nucleoside triphosphate metabolic process	14246	58/6278	0.304473	0.661091	CsaV3_5G020410	CsaV3_5G020410	1
BP	GO:0006820	anion transport	14246	61/6278	0.317476	0.661091	CsaV3_1G043740	CsaV3_1G043740	1
BP	GO:0006952	defense response	14246	67/6278	0.342776	0.661091	CsaV3_5G036400	CsaV3_5G036400	1
BP	GO:0009150	purine ribonucleotide metabolic process	14246	71/6278	0.359133	0.661091	CsaV3_5G020410	CsaV3_5G020410	1
BP	GO:0009259	ribonucleotide metabolic process	14246	71/6278	0.359133	0.661091	CsaV3_5G020410	CsaV3_5G020410	1
BP	GO:0006163	purine nucleotide metabolic process	14246	73/6278	0.367161	0.661091	CsaV3_5G020410	CsaV3_5G020410	1
BP	GO:0072521	purine-containing compound metabolic process	14246	74/6278	0.371139	0.661091	CsaV3_5G020410	CsaV3_5G020410	1
BP	GO:0019693	ribose phosphate metabolic process	14246	77/6278	0.382926	0.661418	CsaV3_5G020410	CsaV3_5G020410	1
BP	GO:0032787	monocarboxylic acid metabolic process	14246	88/6278	0.424332	0.711379	CsaV3_6G024110	CsaV3_6G024110	1
BP	GO:0009117	nucleotide metabolic process	14246	95/6278	0.449257	0.716825	CsaV3_5G020410	CsaV3_5G020410	1
BP	GO:0006753	nucleoside phosphate metabolic process	14246	96/6278	0.452731	0.716825	CsaV3_5G020410	CsaV3_5G020410	1
BP	GO:0017144	drug metabolic process	14246	100/6278	0.466415	0.718531	CsaV3_5G020410	CsaV3_5G020410	1
BP	GO:0065008	regulation of biological quality	14246	109/6278	0.495994	0.7342	CsaV3_1G040500	CsaV3_1G040500	1
BP	GO:0055086	nucleobase-containing small molecule metabolic process	14246	111/6278	0.502347	0.7342	CsaV3_5G020410	CsaV3_5G020410	1
BP	GO:0044255	cellular lipid metabolic process	14246	128/6278	0.553289	0.788436	CsaV3_6G024110	CsaV3_6G024110	1
BP	GO:0071702	organic substance transport	14246	150/6278	0.611724	0.845957	CsaV3_1G043740	CsaV3_1G043740	1
BP	GO:0019637	organophosphate metabolic process	14246	155/6278	0.623927	0.845957	CsaV3_5G020410	CsaV3_5G020410	1
BP	GO:1901135	carbohydrate derivative metabolic process	14246	163/6278	0.642679	0.845957	CsaV3_5G020410	CsaV3_5G020410	1
BP	GO:0044281	small molecule metabolic process	14277	353/6278	0.65302	0.845957	CsaV3_5G020410/CsaV3_6G024110	CsaV3_5G020410/CsaV3_6G024110	2
BP	GO:0019752	carboxylic acid metabolic process	14246	222/6278	0.755471	0.88073	CsaV3_6G024110	CsaV3_6G024110	1
BP	GO:0043436	oxoacid metabolic process	14246	230/6278	0.767795	0.88073	CsaV3_6G024110	CsaV3_6G024110	1
BP	GO:0006082	organic acid metabolic process	14246	231/6278	0.769293	0.88073	CsaV3_6G024110	CsaV3_6G024110	1
BP	GO:0006508	proteolysis	14246	256/6278	0.803813	0.88073	CsaV3_5G037540	CsaV3_5G037540	1
BP	GO:0006412	translation	14246	271/6278	0.822052	0.88073	CsaV3_1G029590	CsaV3_1G029590	1
BP	GO:0043043	peptide biosynthetic process	14246	274/6278	0.825496	0.88073	CsaV3_1G029590	CsaV3_1G029590	1
BP	GO:0006811	ion transport	14246	280/6278	0.83219	0.88073	CsaV3_1G043740	CsaV3_1G043740	1
BP	GO:0006518	peptide metabolic process	14246	281/6278	0.833281	0.88073	CsaV3_1G029590	CsaV3_1G029590	1
BP	GO:0043604	amide biosynthetic process	14246	286/6278	0.838634	0.88073	CsaV3_1G029590	CsaV3_1G029590	1
BP	GO:0006950	response to stress	14246	289/6278	0.841765	0.88073	CsaV3_5G036400	CsaV3_5G036400	1
BP	GO:0043603	cellular amide metabolic process	14246	297/6278	0.849827	0.88073	CsaV3_1G029590	CsaV3_1G029590	1
BP	GO:0055085	transmembrane transport	14246	409/6278	0.928323	0.9449	CsaV3_5G006030	CsaV3_5G006030	1
BP	GO:1901566	organonitrogen compound biosynthetic process	14246	488/6278	0.957821	0.957821	CsaV3_1G029590	CsaV3_1G029590	1
CC	GO:0031012	extracellular matrix	44440	20/2213	0.0785954	0.392977	CsaV3_5G037540	CsaV3_5G037540	1
CC	GO:0044421	extracellular region part	44440	20/2213	0.0785954	0.392977	CsaV3_5G037540	CsaV3_5G037540	1
CC	GO:0005576	extracellular region	44440	47/2213	0.175976	0.586588	CsaV3_5G037540	CsaV3_5G037540	1
CC	GO:0005634	nucleus	44441	374/2213	0.465403	0.884335	CsaV3_3G016620/CsaV3_6G015700	CsaV3_3G016620/CsaV3_6G015700	2
CC	GO:0005840	ribosome	44440	198/2213	0.570516	0.884335	CsaV3_1G029590	CsaV3_1G029590	1
CC	GO:1990904	ribonucleoprotein complex	44440	224/2213	0.617983	0.884335	CsaV3_1G029590	CsaV3_1G029590	1
CC	GO:0043228	non-membrane-bounded organelle	44440	282/2213	0.707468	0.884335	CsaV3_1G029590	CsaV3_1G029590	1
CC	GO:0043232	intracellular non-membrane-bounded organelle	44440	282/2213	0.707468	0.884335	CsaV3_1G029590	CsaV3_1G029590	1
CC	GO:0044444	cytoplasmic part	44440	421/2213	0.850877	0.899128	CsaV3_1G029590	CsaV3_1G029590	1
CC	GO:0005737	cytoplasm	44440	497/2213	0.899128	0.899128	CsaV3_1G029590	CsaV3_1G029590	1
MF	GO:0016614	oxidoreductase activity, acting on CH-OH group of donors	19511	142/9200	0.000153747	0.00968609	CsaV3_1G040500/CsaV3_2G008150/CsaV3_2G008160/CsaV3_3G043880/CsaV3_6G024110/CsaV3_UNG235410	CsaV3_1G040500/CsaV3_2G008150/CsaV3_2G008160/CsaV3_3G043880/CsaV3_6G024110/CsaV3_UNG235410	6
MF	GO:0005506	iron ion binding	19511	230/9200	0.00196675	0.0368017	CsaV3_1G006140/CsaV3_1G043200/CsaV3_3G027050/CsaV3_3G044750/CsaV3_5G030850/CsaV3_6G000610	CsaV3_1G006140/CsaV3_1G043200/CsaV3_3G027050/CsaV3_3G044750/CsaV3_5G030850/CsaV3_6G000610	6
MF	GO:0050660	flavin adenine dinucleotide binding	19450	97/9200	0.00229009	0.0368017	CsaV3_1G040500/CsaV3_2G008150/CsaV3_2G008160/CsaV3_3G043880	CsaV3_1G040500/CsaV3_2G008150/CsaV3_2G008160/CsaV3_3G043880	4
MF	GO:0016705	oxidoreductase activity, acting on paired donors, with incorporation or reduction of molecular oxygen	19511	238/9200	0.00233662	0.0368017	CsaV3_1G006140/CsaV3_1G043200/CsaV3_3G027050/CsaV3_3G044750/CsaV3_5G030850/CsaV3_6G000610	CsaV3_1G006140/CsaV3_1G043200/CsaV3_3G027050/CsaV3_3G044750/CsaV3_5G030850/CsaV3_6G000610	6
MF	GO:0020037	heme binding	19511	299/9200	0.00712593	0.0796807	CsaV3_1G006140/CsaV3_1G043200/CsaV3_3G027050/CsaV3_3G044750/CsaV3_5G030850/CsaV3_6G000610	CsaV3_1G006140/CsaV3_1G043200/CsaV3_3G027050/CsaV3_3G044750/CsaV3_5G030850/CsaV3_6G000610	6
MF	GO:0046906	tetrapyrrole binding	19511	303/9200	0.00758864	0.0796807	CsaV3_1G006140/CsaV3_1G043200/CsaV3_3G027050/CsaV3_3G044750/CsaV3_5G030850/CsaV3_6G000610	CsaV3_1G006140/CsaV3_1G043200/CsaV3_3G027050/CsaV3_3G044750/CsaV3_5G030850/CsaV3_6G000610	6
MF	GO:0008168	methyltransferase activity	19450	142/9200	0.00887364	0.0798628	CsaV3_6G046490/CsaV3_6G046500/CsaV3_6G046510/CsaV3_7G003200	CsaV3_6G046490/CsaV3_6G046500/CsaV3_6G046510/CsaV3_7G003200	4
MF	GO:0016741	transferase activity, transferring one-carbon groups	19450	149/9200	0.0104659	0.0824187	CsaV3_6G046490/CsaV3_6G046500/CsaV3_6G046510/CsaV3_7G003200	CsaV3_6G046490/CsaV3_6G046500/CsaV3_6G046510/CsaV3_7G003200	4
MF	GO:0050662	coenzyme binding	19480	275/9200	0.0205184	0.143629	CsaV3_1G040500/CsaV3_2G008150/CsaV3_2G008160/CsaV3_3G043880/CsaV3_UNG235410	CsaV3_1G040500/CsaV3_2G008150/CsaV3_2G008160/CsaV3_3G043880/CsaV3_UNG235410	5
MF	GO:0004553	hydrolase activity, hydrolyzing O-glycosyl compounds	19480	296/9200	0.02716	0.171108	CsaV3_1G042480/CsaV3_3G017650/CsaV3_3G043070/CsaV3_4G001500/CsaV3_5G002300	CsaV3_1G042480/CsaV3_3G017650/CsaV3_3G043070/CsaV3_4G001500/CsaV3_5G002300	5
MF	GO:0016798	hydrolase activity, acting on glycosyl bonds	19480	313/9200	0.0334476	0.191564	CsaV3_1G042480/CsaV3_3G017650/CsaV3_3G043070/CsaV3_4G001500/CsaV3_5G002300	CsaV3_1G042480/CsaV3_3G017650/CsaV3_3G043070/CsaV3_4G001500/CsaV3_5G002300	5
MF	GO:0051537	2 iron, 2 sulfur cluster binding	19360	2666577	0.061608	0.294923	CsaV3_5G005490	CsaV3_5G005490	1
MF	GO:0016645	oxidoreductase activity, acting on the CH-NH group of donors	19360	2666607	0.0670204	0.294923	CsaV3_1G040500	CsaV3_1G040500	1
MF	GO:0046983	protein dimerization activity	19450	271/9200	0.070121	0.294923	CsaV3_1G017300/CsaV3_3G016620/CsaV3_4G000010/CsaV3_7G003200	CsaV3_1G017300/CsaV3_3G016620/CsaV3_4G000010/CsaV3_7G003200	4
MF	GO:0016620	oxidoreductase activity, acting on the aldehyde or oxo group of donors, NAD or NADP as acceptor	19360	14/9200	0.0777535	0.294923	CsaV3_1G014400	CsaV3_1G014400	1
MF	GO:0005096	GTPase activator activity	19360	16/9200	0.0883655	0.294923	CsaV3_5G036680	CsaV3_5G036680	1
MF	GO:0016616	oxidoreductase activity, acting on the CH-OH group of donors, NAD or NADP as acceptor	19391	87/9200	0.0893944	0.294923	CsaV3_6G024110/CsaV3_UNG235410	CsaV3_6G024110/CsaV3_UNG235410	2
MF	GO:0004470	malic enzyme activity	19360	17/9200	0.0936264	0.294923	CsaV3_UNG235410	CsaV3_UNG235410	1
MF	GO:0004471	malate dehydrogenase (decarboxylating) (NAD+) activity	19360	17/9200	0.0936264	0.294923	CsaV3_UNG235410	CsaV3_UNG235410	1
MF	GO:0016615	malate dehydrogenase activity	19360	17/9200	0.0936264	0.294923	CsaV3_UNG235410	CsaV3_UNG235410	1
MF	GO:0008047	enzyme activator activity	19360	21/9200	0.114374	0.301109	CsaV3_5G036680	CsaV3_5G036680	1
MF	GO:0016903	oxidoreductase activity, acting on the aldehyde or oxo group of donors	19360	21/9200	0.114374	0.301109	CsaV3_1G014400	CsaV3_1G014400	1
MF	GO:0008171	O-methyltransferase activity	19360	22/9200	0.119488	0.301109	CsaV3_7G003200	CsaV3_7G003200	1
MF	GO:0009982	pseudouridine synthase activity	19360	22/9200	0.119488	0.301109	CsaV3_UNG004060	CsaV3_UNG004060	1
MF	GO:0030695	GTPase regulator activity	19360	22/9200	0.119488	0.301109	CsaV3_5G036680	CsaV3_5G036680	1
MF	GO:0010333	terpene synthase activity	19360	25/9200	0.134655	0.314184	CsaV3_3G002840	CsaV3_3G002840	1
MF	GO:0009055	electron transfer activity	19391	115/9200	0.141798	0.314184	CsaV3_5G026830/CsaV3_UNG102750	CsaV3_5G026830/CsaV3_UNG102750	2
MF	GO:0016838	carbon-oxygen lyase activity, acting on phosphates	19360	27/9200	0.144625	0.314184	CsaV3_3G002840	CsaV3_3G002840	1
MF	GO:0060589	nucleoside-triphosphatase regulator activity	19360	27/9200	0.144625	0.314184	CsaV3_5G036680	CsaV3_5G036680	1
MF	GO:0005516	calmodulin binding	19360	31/9200	0.164226	0.343567	CsaV3_1G005770	CsaV3_1G005770	1
MF	GO:0016866	intramolecular transferase activity	19360	32/9200	0.169057	0.343567	CsaV3_UNG004060	CsaV3_UNG004060	1
MF	GO:0016788	hydrolase activity, acting on ester bonds	19419	275/9200	0.21058	0.382298	CsaV3_1G002380/CsaV3_1G032910/CsaV3_7G023310	CsaV3_1G002380/CsaV3_1G032910/CsaV3_7G023310	3
MF	GO:0003899	DNA-directed 5'-3' RNA polymerase activity	19360	41/9200	0.211322	0.382298	CsaV3_6G015700	CsaV3_6G015700	1
MF	GO:0004222	metalloendopeptidase activity	19360	42/9200	0.215885	0.382298	CsaV3_5G037540	CsaV3_5G037540	1
MF	GO:0016702	oxidoreductase activity, acting on single donors with incorporation of molecular oxygen, incorporation of two atoms of oxygen	19360	43/9200	0.220423	0.382298	CsaV3_2G006370	CsaV3_2G006370	1
MF	GO:0051213	dioxygenase activity	19360	45/9200	0.229422	0.382298	CsaV3_2G006370	CsaV3_2G006370	1
MF	GO:0034062	5'-3' RNA polymerase activity	19360	47/9200	0.238319	0.382298	CsaV3_6G015700	CsaV3_6G015700	1
MF	GO:0097747	RNA polymerase activity	19360	47/9200	0.238319	0.382298	CsaV3_6G015700	CsaV3_6G015700	1
MF	GO:0051536	iron-sulfur cluster binding	19360	48/9200	0.242729	0.382298	CsaV3_5G005490	CsaV3_5G005490	1
MF	GO:0051540	metal cluster binding	19360	48/9200	0.242729	0.382298	CsaV3_5G005490	CsaV3_5G005490	1
MF	GO:0008237	metallopeptidase activity	19360	50/9200	0.251475	0.386413	CsaV3_5G037540	CsaV3_5G037540	1
MF	GO:0016701	oxidoreductase activity, acting on single donors with incorporation of molecular oxygen	19360	54/9200	0.268671	0.396655	CsaV3_2G006370	CsaV3_2G006370	1
MF	GO:0051287	NAD binding	19360	55/9200	0.272909	0.396655	CsaV3_UNG235410	CsaV3_UNG235410	1
MF	GO:0004650	polygalacturonase activity	19360	57/9200	0.281312	0.396655	CsaV3_4G001500	CsaV3_4G001500	1
MF	GO:0016835	carbon-oxygen lyase activity	19360	58/9200	0.285478	0.396655	CsaV3_3G002840	CsaV3_3G002840	1
MF	GO:0000287	magnesium ion binding	19360	59/9200	0.289621	0.396655	CsaV3_3G002840	CsaV3_3G002840	1
MF	GO:0016779	nucleotidyltransferase activity	19360	85/9200	0.389424	0.521994	CsaV3_6G015700	CsaV3_6G015700	1
MF	GO:0016853	isomerase activity	19360	100/9200	0.440601	0.578289	CsaV3_UNG004060	CsaV3_UNG004060	1
MF	GO:0016829	lyase activity	19360	122/9200	0.508134	0.643867	CsaV3_3G002840	CsaV3_3G002840	1
MF	GO:0030234	enzyme regulator activity	19360	123/9200	0.511005	0.643867	CsaV3_5G036680	CsaV3_5G036680	1
MF	GO:0004175	endopeptidase activity	19360	127/9200	0.522328	0.645229	CsaV3_5G037540	CsaV3_5G037540	1
MF	GO:0098772	molecular function regulator	19360	136/9200	0.546873	0.662558	CsaV3_5G036680	CsaV3_5G036680	1
MF	GO:0140098	catalytic activity, acting on RNA	19360	148/9200	0.577683	0.68668	CsaV3_6G015700	CsaV3_6G015700	1
MF	GO:0003700	DNA binding transcription factor activity	19391	374/9200	0.641017	0.747854	CsaV3_3G016620/CsaV3_3G045550	CsaV3_3G016620/CsaV3_3G045550	2
MF	GO:0140110	transcription regulator activity	19391	397/9200	0.673586	0.771562	CsaV3_3G016620/CsaV3_3G045550	CsaV3_3G016620/CsaV3_3G045550	2
MF	GO:0003735	structural constituent of ribosome	19360	201/9200	0.690912	0.777276	CsaV3_1G029590	CsaV3_1G029590	1
MF	GO:0005198	structural molecule activity	19360	216/9200	0.71714	0.792628	CsaV3_1G029590	CsaV3_1G029590	1
MF	GO:0003723	RNA binding	19360	239/9200	0.753171	0.806413	CsaV3_UNG004060	CsaV3_UNG004060	1
MF	GO:0070011	peptidase activity, acting on L-amino acid peptides	19360	250/9200	0.768771	0.806413	CsaV3_5G037540	CsaV3_5G037540	1
MF	GO:0005215	transporter activity	19391	479/9200	0.770968	0.806413	CsaV3_1G033560/CsaV3_5G006030	CsaV3_1G033560/CsaV3_5G006030	2
MF	GO:0008233	peptidase activity	19360	259/9200	0.780812	0.806413	CsaV3_5G037540	CsaV3_5G037540	1
MF	GO:0008270	zinc ion binding	19360	335/9200	0.860764	0.874648	CsaV3_5G037540	CsaV3_5G037540	1
MF	GO:0022857	transmembrane transporter activity	19360	363/9200	0.882315	0.882315	CsaV3_5G006030	CsaV3_5G006030	1

## Sheet: ME_DarkTurquoise GO Enrichment
Category	GOID	Description	GeneRatio	BgRatio	pvalue	padj	geneID	geneName	Count
BP	GO:0005975	carbohydrate metabolic process	18080	446/6278	0.0560784	0.587172	CsaV3_2G003450/CsaV3_2G016670/CsaV3_3G008490/CsaV3_3G011520/CsaV3_7G002760/CsaV3_UNG086690/CsaV3_UNG230070	CsaV3_2G003450/CsaV3_2G016670/CsaV3_3G008490/CsaV3_3G011520/CsaV3_7G002760/CsaV3_UNG086690/CsaV3_UNG230070	7
BP	GO:0006505	GPI anchor metabolic process	17899	1599307	0.0754175	0.587172	CsaV3_6G002380	CsaV3_6G002380	1
BP	GO:0006904	vesicle docking involved in exocytosis	17899	1599307	0.0754175	0.587172	CsaV3_5G012530	CsaV3_5G012530	1
BP	GO:0046474	glycerophospholipid biosynthetic process	17899	1599307	0.0754175	0.587172	CsaV3_6G002380	CsaV3_6G002380	1
BP	GO:0140029	exocytic process	17899	1599307	0.0754175	0.587172	CsaV3_5G012530	CsaV3_5G012530	1
BP	GO:0019684	photosynthesis, light reaction	17899	1599338	0.0826454	0.587172	CsaV3_5G013200	CsaV3_5G013200	1
BP	GO:0022406	membrane docking	17899	1599338	0.0826454	0.587172	CsaV3_5G012530	CsaV3_5G012530	1
BP	GO:0048278	vesicle docking	17899	1599338	0.0826454	0.587172	CsaV3_5G012530	CsaV3_5G012530	1
BP	GO:0051640	organelle localization	17899	1599338	0.0826454	0.587172	CsaV3_5G012530	CsaV3_5G012530	1
BP	GO:0140056	organelle localization by membrane tethering	17899	1599338	0.0826454	0.587172	CsaV3_5G012530	CsaV3_5G012530	1
BP	GO:0009247	glycolipid biosynthetic process	17899	1599368	0.0898179	0.587172	CsaV3_6G002380	CsaV3_6G002380	1
BP	GO:0046467	membrane lipid biosynthetic process	17899	1599368	0.0898179	0.587172	CsaV3_6G002380	CsaV3_6G002380	1
BP	GO:0006664	glycolipid metabolic process	17899	14/6278	0.103999	0.587172	CsaV3_6G002380	CsaV3_6G002380	1
BP	GO:0022900	electron transport chain	17899	14/6278	0.103999	0.587172	CsaV3_5G013200	CsaV3_5G013200	1
BP	GO:0045017	glycerolipid biosynthetic process	17899	14/6278	0.103999	0.587172	CsaV3_6G002380	CsaV3_6G002380	1
BP	GO:1903509	liposaccharide metabolic process	17899	14/6278	0.103999	0.587172	CsaV3_6G002380	CsaV3_6G002380	1
BP	GO:0009057	macromolecule catabolic process	17930	76/6278	0.118299	0.587172	CsaV3_3G011520/CsaV3_5G030400	CsaV3_3G011520/CsaV3_5G030400	2
BP	GO:0006643	membrane lipid metabolic process	17899	19/6278	0.13851	0.587172	CsaV3_6G002380	CsaV3_6G002380	1
BP	GO:0006412	translation	17989	271/6278	0.159747	0.587172	CsaV3_5G013200/CsaV3_5G032760/CsaV3_UNG103770/CsaV3_UNG210040	CsaV3_5G013200/CsaV3_5G032760/CsaV3_UNG103770/CsaV3_UNG210040	4
BP	GO:0043043	peptide biosynthetic process	17989	274/6278	0.164253	0.587172	CsaV3_5G013200/CsaV3_5G032760/CsaV3_UNG103770/CsaV3_UNG210040	CsaV3_5G013200/CsaV3_5G032760/CsaV3_UNG103770/CsaV3_UNG210040	4
BP	GO:0008610	lipid biosynthetic process	17930	94/6278	0.166478	0.587172	CsaV3_6G002380/CsaV3_7G032980	CsaV3_6G002380/CsaV3_7G032980	2
BP	GO:0006518	peptide metabolic process	17989	281/6278	0.174949	0.587172	CsaV3_5G013200/CsaV3_5G032760/CsaV3_UNG103770/CsaV3_UNG210040	CsaV3_5G013200/CsaV3_5G032760/CsaV3_UNG103770/CsaV3_UNG210040	4
BP	GO:0008654	phospholipid biosynthetic process	17899	25/6278	0.178208	0.587172	CsaV3_6G002380	CsaV3_6G002380	1
BP	GO:0043604	amide biosynthetic process	17989	286/6278	0.182738	0.587172	CsaV3_5G013200/CsaV3_5G032760/CsaV3_UNG103770/CsaV3_UNG210040	CsaV3_5G013200/CsaV3_5G032760/CsaV3_UNG103770/CsaV3_UNG210040	4
BP	GO:0043603	cellular amide metabolic process	17989	297/6278	0.200282	0.587172	CsaV3_5G013200/CsaV3_5G032760/CsaV3_UNG103770/CsaV3_UNG210040	CsaV3_5G013200/CsaV3_5G032760/CsaV3_UNG103770/CsaV3_UNG210040	4
BP	GO:0046488	phosphatidylinositol metabolic process	17899	29/6278	0.203672	0.587172	CsaV3_6G002380	CsaV3_6G002380	1
BP	GO:0006887	exocytosis	17899	30/6278	0.209916	0.587172	CsaV3_5G012530	CsaV3_5G012530	1
BP	GO:0032940	secretion by cell	17899	30/6278	0.209916	0.587172	CsaV3_5G012530	CsaV3_5G012530	1
BP	GO:0046903	secretion	17899	30/6278	0.209916	0.587172	CsaV3_5G012530	CsaV3_5G012530	1
BP	GO:0006650	glycerophospholipid metabolic process	17899	31/6278	0.216113	0.587172	CsaV3_6G002380	CsaV3_6G002380	1
BP	GO:0051641	cellular localization	17930	113/6278	0.220324	0.587172	CsaV3_4G004990/CsaV3_5G012530	CsaV3_4G004990/CsaV3_5G012530	2
BP	GO:0016192	vesicle-mediated transport	17930	116/6278	0.228986	0.587172	CsaV3_4G004990/CsaV3_5G012530	CsaV3_4G004990/CsaV3_5G012530	2
BP	GO:0006633	fatty acid biosynthetic process	17899	34/6278	0.234417	0.587172	CsaV3_7G032980	CsaV3_7G032980	1
BP	GO:0008037	cell recognition	17899	34/6278	0.234417	0.587172	CsaV3_3G005840	CsaV3_3G005840	1
BP	GO:0009856	pollination	17899	34/6278	0.234417	0.587172	CsaV3_3G005840	CsaV3_3G005840	1
BP	GO:0009875	pollen-pistil interaction	17899	34/6278	0.234417	0.587172	CsaV3_3G005840	CsaV3_3G005840	1
BP	GO:0044706	multi-multicellular organism process	17899	34/6278	0.234417	0.587172	CsaV3_3G005840	CsaV3_3G005840	1
BP	GO:0048544	recognition of pollen	17899	34/6278	0.234417	0.587172	CsaV3_3G005840	CsaV3_3G005840	1
BP	GO:0046486	glycerolipid metabolic process	17899	35/6278	0.240425	0.587172	CsaV3_6G002380	CsaV3_6G002380	1
BP	GO:0000003	reproduction	17899	36/6278	0.246387	0.587172	CsaV3_3G005840	CsaV3_3G005840	1
BP	GO:0006418	tRNA aminoacylation for protein translation	17899	36/6278	0.246387	0.587172	CsaV3_UNG103770	CsaV3_UNG103770	1
BP	GO:0022414	reproductive process	17899	36/6278	0.246387	0.587172	CsaV3_3G005840	CsaV3_3G005840	1
BP	GO:0043038	amino acid activation	17899	38/6278	0.258173	0.587172	CsaV3_UNG103770	CsaV3_UNG103770	1
BP	GO:0043039	tRNA aminoacylation	17899	38/6278	0.258173	0.587172	CsaV3_UNG103770	CsaV3_UNG103770	1
BP	GO:0044255	cellular lipid metabolic process	17930	128/6278	0.26384	0.587172	CsaV3_6G002380/CsaV3_7G032980	CsaV3_6G002380/CsaV3_7G032980	2
BP	GO:0016052	carbohydrate catabolic process	17899	40/6278	0.269779	0.587172	CsaV3_3G011520	CsaV3_3G011520	1
BP	GO:0044257	cellular protein catabolic process	17899	43/6278	0.286854	0.587172	CsaV3_5G030400	CsaV3_5G030400	1
BP	GO:0051603	proteolysis involved in cellular protein catabolic process	17899	43/6278	0.286854	0.587172	CsaV3_5G030400	CsaV3_5G030400	1
BP	GO:1901575	organic substance catabolic process	17930	136/6278	0.287137	0.587172	CsaV3_3G011520/CsaV3_5G030400	CsaV3_3G011520/CsaV3_5G030400	2
BP	GO:0051704	multi-organism process	17899	44/6278	0.292459	0.587172	CsaV3_3G005840	CsaV3_3G005840	1
BP	GO:0009056	catabolic process	17930	141/6278	0.301675	0.587172	CsaV3_3G011520/CsaV3_5G030400	CsaV3_3G011520/CsaV3_5G030400	2
BP	GO:0006644	phospholipid metabolic process	17899	46/6278	0.303539	0.587172	CsaV3_6G002380	CsaV3_6G002380	1
BP	GO:0015979	photosynthesis	17899	46/6278	0.303539	0.587172	CsaV3_5G013200	CsaV3_5G013200	1
BP	GO:0030163	protein catabolic process	17899	46/6278	0.303539	0.587172	CsaV3_5G030400	CsaV3_5G030400	1
BP	GO:0006629	lipid metabolic process	17958	249/6278	0.307566	0.587172	CsaV3_3G027160/CsaV3_6G002380/CsaV3_7G032980	CsaV3_3G027160/CsaV3_6G002380/CsaV3_7G032980	3
BP	GO:0006508	proteolysis	17958	256/6278	0.322709	0.590879	CsaV3_2G020870/CsaV3_5G003480/CsaV3_5G030400	CsaV3_2G020870/CsaV3_5G003480/CsaV3_5G030400	3
BP	GO:0006631	fatty acid metabolic process	17899	50/6278	0.325191	0.590879	CsaV3_7G032980	CsaV3_7G032980	1
BP	GO:0006091	generation of precursor metabolites and energy	17899	51/6278	0.3305	0.590879	CsaV3_5G013200	CsaV3_5G013200	1
BP	GO:1901566	organonitrogen compound biosynthetic process	18019	488/6278	0.332018	0.590879	CsaV3_5G013200/CsaV3_5G032760/CsaV3_6G002380/CsaV3_UNG103770/CsaV3_UNG210040	CsaV3_5G013200/CsaV3_5G032760/CsaV3_6G002380/CsaV3_UNG103770/CsaV3_UNG210040	5
BP	GO:0032501	multicellular organismal process	17899	55/6278	0.351331	0.613542	CsaV3_3G005840	CsaV3_3G005840	1
BP	GO:0044265	cellular macromolecule catabolic process	17899	56/6278	0.356438	0.613542	CsaV3_5G030400	CsaV3_5G030400	1
BP	GO:0006952	defense response	17899	67/6278	0.410086	0.677425	CsaV3_UNG159170	CsaV3_UNG159170	1
BP	GO:0006399	tRNA metabolic process	17899	68/6278	0.41474	0.677425	CsaV3_UNG103770	CsaV3_UNG103770	1
BP	GO:1901565	organonitrogen compound catabolic process	17899	68/6278	0.41474	0.677425	CsaV3_5G030400	CsaV3_5G030400	1
BP	GO:0072330	monocarboxylic acid biosynthetic process	17899	69/6278	0.419358	0.677425	CsaV3_7G032980	CsaV3_7G032980	1
BP	GO:0005976	polysaccharide metabolic process	17899	74/6278	0.441918	0.695578	CsaV3_3G011520	CsaV3_3G011520	1
BP	GO:0006886	intracellular protein transport	17899	80/6278	0.467858	0.695578	CsaV3_4G004990	CsaV3_4G004990	1
BP	GO:0045454	cell redox homeostasis	17899	81/6278	0.472065	0.695578	CsaV3_1G010690	CsaV3_1G010690	1
BP	GO:0019725	cellular homeostasis	17899	82/6278	0.47624	0.695578	CsaV3_1G010690	CsaV3_1G010690	1
BP	GO:0042592	homeostatic process	17899	83/6278	0.480382	0.695578	CsaV3_1G010690	CsaV3_1G010690	1
BP	GO:0034660	ncRNA metabolic process	17899	86/6278	0.492616	0.695578	CsaV3_UNG103770	CsaV3_UNG103770	1
BP	GO:0006979	response to oxidative stress	17899	88/6278	0.500616	0.695578	CsaV3_4G023650	CsaV3_4G023650	1
BP	GO:0032787	monocarboxylic acid metabolic process	17899	88/6278	0.500616	0.695578	CsaV3_7G032980	CsaV3_7G032980	1
BP	GO:0034613	cellular protein localization	17899	91/6278	0.512383	0.695578	CsaV3_4G004990	CsaV3_4G004990	1
BP	GO:0046907	intracellular transport	17899	91/6278	0.512383	0.695578	CsaV3_4G004990	CsaV3_4G004990	1
BP	GO:0051649	establishment of localization in cell	17899	91/6278	0.512383	0.695578	CsaV3_4G004990	CsaV3_4G004990	1
BP	GO:0070727	cellular macromolecule localization	17899	91/6278	0.512383	0.695578	CsaV3_4G004990	CsaV3_4G004990	1
BP	GO:0019752	carboxylic acid metabolic process	17930	222/6278	0.521742	0.695578	CsaV3_7G032980/CsaV3_UNG103770	CsaV3_7G032980/CsaV3_UNG103770	2
BP	GO:0043436	oxoacid metabolic process	17930	230/6278	0.541051	0.695578	CsaV3_7G032980/CsaV3_UNG103770	CsaV3_7G032980/CsaV3_UNG103770	2
BP	GO:0006082	organic acid metabolic process	17930	231/6278	0.543428	0.695578	CsaV3_7G032980/CsaV3_UNG103770	CsaV3_7G032980/CsaV3_UNG103770	2
BP	GO:0090407	organophosphate biosynthetic process	17899	101/6278	0.54968	0.695578	CsaV3_6G002380	CsaV3_6G002380	1
BP	GO:0065008	regulation of biological quality	17899	109/6278	0.577492	0.695578	CsaV3_1G010690	CsaV3_1G010690	1
BP	GO:0006520	cellular amino acid metabolic process	17899	110/6278	0.580848	0.695578	CsaV3_UNG103770	CsaV3_UNG103770	1
BP	GO:0015031	protein transport	17899	110/6278	0.580848	0.695578	CsaV3_4G004990	CsaV3_4G004990	1
BP	GO:0015833	peptide transport	17899	110/6278	0.580848	0.695578	CsaV3_4G004990	CsaV3_4G004990	1
BP	GO:0042886	amide transport	17899	110/6278	0.580848	0.695578	CsaV3_4G004990	CsaV3_4G004990	1
BP	GO:1901137	carbohydrate derivative biosynthetic process	17899	111/6278	0.584178	0.695578	CsaV3_6G002380	CsaV3_6G002380	1
BP	GO:0030001	metal ion transport	17899	115/6278	0.59724	0.695578	CsaV3_5G035570	CsaV3_5G035570	1
BP	GO:0045184	establishment of protein localization	17899	115/6278	0.59724	0.695578	CsaV3_4G004990	CsaV3_4G004990	1
BP	GO:0016053	organic acid biosynthetic process	17899	120/6278	0.613004	0.695578	CsaV3_7G032980	CsaV3_7G032980	1
BP	GO:0046394	carboxylic acid biosynthetic process	17899	120/6278	0.613004	0.695578	CsaV3_7G032980	CsaV3_7G032980	1
BP	GO:0008104	protein localization	17899	121/6278	0.616083	0.695578	CsaV3_4G004990	CsaV3_4G004990	1
BP	GO:0044248	cellular catabolic process	17899	121/6278	0.616083	0.695578	CsaV3_5G030400	CsaV3_5G030400	1
BP	GO:0033036	macromolecule localization	17899	129/6278	0.639869	0.714748	CsaV3_4G004990	CsaV3_4G004990	1
BP	GO:0071705	nitrogen compound transport	17899	137/6278	0.66221	0.729442	CsaV3_4G004990	CsaV3_4G004990	1
BP	GO:0006950	response to stress	17930	289/6278	0.666919	0.729442	CsaV3_4G023650/CsaV3_UNG159170	CsaV3_4G023650/CsaV3_UNG159170	2
BP	GO:0044283	small molecule biosynthetic process	17899	145/6278	0.683191	0.739537	CsaV3_7G032980	CsaV3_7G032980	1
BP	GO:0071702	organic substance transport	17899	150/6278	0.69565	0.745339	CsaV3_4G004990	CsaV3_4G004990	1
BP	GO:0019637	organophosphate metabolic process	17899	155/6278	0.707629	0.750516	CsaV3_6G002380	CsaV3_6G002380	1
BP	GO:1901135	carbohydrate derivative metabolic process	17899	163/6278	0.725841	0.762133	CsaV3_6G002380	CsaV3_6G002380	1
BP	GO:0044281	small molecule metabolic process	17930	353/6278	0.771199	0.801742	CsaV3_7G032980/CsaV3_UNG103770	CsaV3_7G032980/CsaV3_UNG103770	2
BP	GO:0006812	cation transport	17899	197/6278	0.791608	0.81489	CsaV3_5G035570	CsaV3_5G035570	1
BP	GO:0007154	cell communication	17899	222/6278	0.829837	0.84595	CsaV3_3G005840	CsaV3_3G005840	1
BP	GO:0055085	transmembrane transport	17930	409/6278	0.83843	0.846491	CsaV3_3G012150/CsaV3_6G003610	CsaV3_3G012150/CsaV3_6G003610	2
BP	GO:0006811	ion transport	17899	280/6278	0.894013	0.894013	CsaV3_5G035570	CsaV3_5G035570	1
CC	GO:0005839	proteasome core complex	41640	17/2213	0.102625	0.332174	CsaV3_5G030400	CsaV3_5G030400	1
CC	GO:0000502	proteasome complex	41640	19/2213	0.114033	0.332174	CsaV3_5G030400	CsaV3_5G030400	1
CC	GO:1905369	endopeptidase complex	41640	19/2213	0.114033	0.332174	CsaV3_5G030400	CsaV3_5G030400	1
CC	GO:0005840	ribosome	41699	198/2213	0.123265	0.332174	CsaV3_5G013200/CsaV3_5G032760/CsaV3_UNG210040	CsaV3_5G013200/CsaV3_5G032760/CsaV3_UNG210040	3
CC	GO:0005789	endoplasmic reticulum membrane	41640	21/2213	0.125306	0.332174	CsaV3_6G002380	CsaV3_6G002380	1
CC	GO:0042175	nuclear outer membrane-endoplasmic reticulum membrane network	41640	21/2213	0.125306	0.332174	CsaV3_6G002380	CsaV3_6G002380	1
CC	GO:0044432	endoplasmic reticulum part	41640	21/2213	0.125306	0.332174	CsaV3_6G002380	CsaV3_6G002380	1
CC	GO:0098827	endoplasmic reticulum subcompartment	41640	21/2213	0.125306	0.332174	CsaV3_6G002380	CsaV3_6G002380	1
CC	GO:1902494	catalytic complex	41671	102/2213	0.133625	0.332174	CsaV3_5G030400/CsaV3_6G002380	CsaV3_5G030400/CsaV3_6G002380	2
CC	GO:1905368	peptidase complex	41640	24/2213	0.141966	0.332174	CsaV3_5G030400	CsaV3_5G030400	1
CC	GO:1990904	ribonucleoprotein complex	41699	224/2213	0.162023	0.332174	CsaV3_5G013200/CsaV3_5G032760/CsaV3_UNG210040	CsaV3_5G013200/CsaV3_5G032760/CsaV3_UNG210040	3
CC	GO:0031984	organelle subcompartment	41640	28/2213	0.163722	0.332174	CsaV3_6G002380	CsaV3_6G002380	1
CC	GO:0005783	endoplasmic reticulum	41640	33/2213	0.190196	0.332174	CsaV3_6G002380	CsaV3_6G002380	1
CC	GO:0098796	membrane protein complex	41671	132/2213	0.201594	0.332174	CsaV3_5G013200/CsaV3_6G002380	CsaV3_5G013200/CsaV3_6G002380	2
CC	GO:0009521	photosystem	41640	40/2213	0.225955	0.332174	CsaV3_5G013200	CsaV3_5G013200	1
CC	GO:0009579	thylakoid	41640	41/2213	0.230942	0.332174	CsaV3_5G013200	CsaV3_5G013200	1
CC	GO:0034357	photosynthetic membrane	41640	41/2213	0.230942	0.332174	CsaV3_5G013200	CsaV3_5G013200	1
CC	GO:0044436	thylakoid part	41640	41/2213	0.230942	0.332174	CsaV3_5G013200	CsaV3_5G013200	1
CC	GO:0043228	non-membrane-bounded organelle	41699	282/2213	0.260248	0.332174	CsaV3_5G013200/CsaV3_5G032760/CsaV3_UNG210040	CsaV3_5G013200/CsaV3_5G032760/CsaV3_UNG210040	3
CC	GO:0043232	intracellular non-membrane-bounded organelle	41699	282/2213	0.260248	0.332174	CsaV3_5G013200/CsaV3_5G032760/CsaV3_UNG210040	CsaV3_5G013200/CsaV3_5G032760/CsaV3_UNG210040	3
CC	GO:0044444	cytoplasmic part	41730	421/2213	0.268294	0.332174	CsaV3_5G013200/CsaV3_5G032760/CsaV3_6G002380/CsaV3_UNG210040	CsaV3_5G013200/CsaV3_5G032760/CsaV3_6G002380/CsaV3_UNG210040	4
CC	GO:0012505	endomembrane system	41640	74/2213	0.379716	0.43881	CsaV3_6G002380	CsaV3_6G002380	1
CC	GO:0005737	cytoplasm	41730	497/2213	0.388178	0.43881	CsaV3_5G013200/CsaV3_5G032760/CsaV3_6G002380/CsaV3_UNG210040	CsaV3_5G013200/CsaV3_5G032760/CsaV3_6G002380/CsaV3_UNG210040	4
CC	GO:0005634	nucleus	41671	374/2213	0.712801	0.739248	CsaV3_1G046360/CsaV3_UNG086680	CsaV3_1G046360/CsaV3_UNG086680	2
CC	GO:0044422	organelle part	41640	202/2213	0.739248	0.739248	CsaV3_6G002380	CsaV3_6G002380	1
CC	GO:0044446	intracellular organelle part	41640	202/2213	0.739248	0.739248	CsaV3_6G002380	CsaV3_6G002380	1
MF	GO:0016798	hydrolase activity, acting on glycosyl bonds	27242	313/9200	0.0035121	0.231799	CsaV3_2G003450/CsaV3_2G016670/CsaV3_3G008490/CsaV3_3G011520/CsaV3_5G023580/CsaV3_7G002760/CsaV3_UNG086690/CsaV3_UNG230070	CsaV3_2G003450/CsaV3_2G016670/CsaV3_3G008490/CsaV3_3G011520/CsaV3_5G023580/CsaV3_7G002760/CsaV3_UNG086690/CsaV3_UNG230070	8
MF	GO:0004553	hydrolase activity, hydrolyzing O-glycosyl compounds	27211	296/9200	0.00948731	0.313081	CsaV3_2G003450/CsaV3_2G016670/CsaV3_3G008490/CsaV3_3G011520/CsaV3_7G002760/CsaV3_UNG086690/CsaV3_UNG230070	CsaV3_2G003450/CsaV3_2G016670/CsaV3_3G008490/CsaV3_3G011520/CsaV3_7G002760/CsaV3_UNG086690/CsaV3_UNG230070	7
MF	GO:0016160	amylase activity	27030	2666577	0.0850488	0.538526	CsaV3_3G011520	CsaV3_3G011520	1
MF	GO:0046906	tetrapyrrole binding	27150	303/9200	0.0963805	0.538526	CsaV3_3G036710/CsaV3_4G023650/CsaV3_5G013200/CsaV3_5G030900/CsaV3_6G046570	CsaV3_3G036710/CsaV3_4G023650/CsaV3_5G013200/CsaV3_5G030900/CsaV3_6G046570	5
MF	GO:0016620	oxidoreductase activity, acting on the aldehyde or oxo group of donors, NAD or NADP as acceptor	27030	14/9200	0.106978	0.538526	CsaV3_4G031150	CsaV3_4G031150	1
MF	GO:0016705	oxidoreductase activity, acting on paired donors, with incorporation or reduction of molecular oxygen	27120	238/9200	0.12451	0.538526	CsaV3_3G011490/CsaV3_3G036710/CsaV3_5G030900/CsaV3_6G046570	CsaV3_3G011490/CsaV3_3G036710/CsaV3_5G030900/CsaV3_6G046570	4
MF	GO:0004298	threonine-type endopeptidase activity	27030	17/9200	0.128389	0.538526	CsaV3_5G030400	CsaV3_5G030400	1
MF	GO:0004499	N,N-dimethylaniline monooxygenase activity	27030	17/9200	0.128389	0.538526	CsaV3_3G011490	CsaV3_3G011490	1
MF	GO:0070003	threonine-type peptidase activity	27030	17/9200	0.128389	0.538526	CsaV3_5G030400	CsaV3_5G030400	1
MF	GO:0016709	oxidoreductase activity, acting on paired donors, with incorporation or reduction of molecular oxygen, NAD(P)H as one donor, and incorporation of one atom of oxygen	27030	19/9200	0.142381	0.538526	CsaV3_3G011490	CsaV3_3G011490	1
MF	GO:0016903	oxidoreductase activity, acting on the aldehyde or oxo group of donors	27030	21/9200	0.156151	0.538526	CsaV3_4G031150	CsaV3_4G031150	1
MF	GO:0000989	transcription factor activity, transcription factor binding	27030	23/9200	0.169703	0.538526	CsaV3_UNG150160	CsaV3_UNG150160	1
MF	GO:0003712	transcription cofactor activity	27030	23/9200	0.169703	0.538526	CsaV3_UNG150160	CsaV3_UNG150160	1
MF	GO:0050661	NADP binding	27030	23/9200	0.169703	0.538526	CsaV3_3G011490	CsaV3_3G011490	1
MF	GO:0050660	flavin adenine dinucleotide binding	27061	97/9200	0.183356	0.538526	CsaV3_1G037470/CsaV3_3G011490	CsaV3_1G037470/CsaV3_3G011490	2
MF	GO:0004185	serine-type carboxypeptidase activity	27030	27/9200	0.196166	0.538526	CsaV3_2G020870	CsaV3_2G020870	1
MF	GO:0004497	monooxygenase activity	27030	27/9200	0.196166	0.538526	CsaV3_3G011490	CsaV3_3G011490	1
MF	GO:0008236	serine-type peptidase activity	27061	102/9200	0.197922	0.538526	CsaV3_2G020870/CsaV3_5G003480	CsaV3_2G020870/CsaV3_5G003480	2
MF	GO:0017171	serine hydrolase activity	27061	102/9200	0.197922	0.538526	CsaV3_2G020870/CsaV3_5G003480	CsaV3_2G020870/CsaV3_5G003480	2
MF	GO:0000988	transcription factor activity, protein binding	27030	29/9200	0.209083	0.538526	CsaV3_UNG150160	CsaV3_UNG150160	1
MF	GO:0004180	carboxypeptidase activity	27030	29/9200	0.209083	0.538526	CsaV3_2G020870	CsaV3_2G020870	1
MF	GO:0070008	serine-type exopeptidase activity	27030	30/9200	0.215465	0.538526	CsaV3_2G020870	CsaV3_2G020870	1
MF	GO:0003735	structural constituent of ribosome	27089	201/9200	0.219429	0.538526	CsaV3_5G013200/CsaV3_5G032760/CsaV3_UNG210040	CsaV3_5G013200/CsaV3_5G032760/CsaV3_UNG210040	3
MF	GO:0020037	heme binding	27120	299/9200	0.219688	0.538526	CsaV3_3G036710/CsaV3_4G023650/CsaV3_5G030900/CsaV3_6G046570	CsaV3_3G036710/CsaV3_4G023650/CsaV3_5G030900/CsaV3_6G046570	4
MF	GO:0016747	transferase activity, transferring acyl groups other than amino-acyl groups	27061	113/9200	0.230412	0.538526	CsaV3_2G035760/CsaV3_4G003660	CsaV3_2G035760/CsaV3_4G003660	2
MF	GO:0008375	acetylglucosaminyltransferase activity	27030	33/9200	0.234307	0.538526	CsaV3_3G020200	CsaV3_3G020200	1
MF	GO:0005198	structural molecule activity	27089	216/9200	0.251518	0.538526	CsaV3_5G013200/CsaV3_5G032760/CsaV3_UNG210040	CsaV3_5G013200/CsaV3_5G032760/CsaV3_UNG210040	3
MF	GO:0004812	aminoacyl-tRNA ligase activity	27030	37/9200	0.258738	0.538526	CsaV3_UNG103770	CsaV3_UNG103770	1
MF	GO:0016875	ligase activity, forming carbon-oxygen bonds	27030	37/9200	0.258738	0.538526	CsaV3_UNG103770	CsaV3_UNG103770	1
MF	GO:0004175	endopeptidase activity	27061	127/9200	0.272217	0.538526	CsaV3_5G003480/CsaV3_5G030400	CsaV3_5G003480/CsaV3_5G030400	2
MF	GO:0005506	iron ion binding	27089	230/9200	0.282078	0.538526	CsaV3_3G036710/CsaV3_5G030900/CsaV3_6G046570	CsaV3_3G036710/CsaV3_5G030900/CsaV3_6G046570	3
MF	GO:0003899	DNA-directed 5'-3' RNA polymerase activity	27030	41/9200	0.282399	0.538526	CsaV3_1G046360	CsaV3_1G046360	1
MF	GO:0016702	oxidoreductase activity, acting on single donors with incorporation of molecular oxygen, incorporation of two atoms of oxygen	27030	43/9200	0.293948	0.538526	CsaV3_3G048570	CsaV3_3G048570	1
MF	GO:0008238	exopeptidase activity	27030	44/9200	0.299654	0.538526	CsaV3_2G020870	CsaV3_2G020870	1
MF	GO:0051213	dioxygenase activity	27030	45/9200	0.305314	0.538526	CsaV3_3G048570	CsaV3_3G048570	1
MF	GO:0034062	5'-3' RNA polymerase activity	27030	47/9200	0.3165	0.538526	CsaV3_1G046360	CsaV3_1G046360	1
MF	GO:0097747	RNA polymerase activity	27030	47/9200	0.3165	0.538526	CsaV3_1G046360	CsaV3_1G046360	1
MF	GO:0070011	peptidase activity, acting on L-amino acid peptides	27089	250/9200	0.32627	0.538526	CsaV3_2G020870/CsaV3_5G003480/CsaV3_5G030400	CsaV3_2G020870/CsaV3_5G003480/CsaV3_5G030400	3
MF	GO:0140098	catalytic activity, acting on RNA	27061	148/9200	0.334723	0.538526	CsaV3_1G046360/CsaV3_UNG103770	CsaV3_1G046360/CsaV3_UNG103770	2
MF	GO:0016746	transferase activity, transferring acyl groups	27061	149/9200	0.337671	0.538526	CsaV3_2G035760/CsaV3_4G003660	CsaV3_2G035760/CsaV3_4G003660	2
MF	GO:0008233	peptidase activity	27089	259/9200	0.346213	0.538526	CsaV3_2G020870/CsaV3_5G003480/CsaV3_5G030400	CsaV3_2G020870/CsaV3_5G003480/CsaV3_5G030400	3
MF	GO:0016701	oxidoreductase activity, acting on single donors with incorporation of molecular oxygen	27030	54/9200	0.354268	0.538526	CsaV3_3G048570	CsaV3_3G048570	1
MF	GO:0043531	ADP binding	27030	55/9200	0.359492	0.538526	CsaV3_2G036060	CsaV3_2G036060	1
MF	GO:0004650	polygalacturonase activity	27030	57/9200	0.369817	0.538526	CsaV3_7G002760	CsaV3_7G002760	1
MF	GO:0016788	hydrolase activity, acting on ester bonds	27089	275/9200	0.381539	0.538526	CsaV3_6G015850/CsaV3_6G015870/CsaV3_7G032980	CsaV3_6G015850/CsaV3_6G015870/CsaV3_7G032980	3
MF	GO:0004252	serine-type endopeptidase activity	27030	60/9200	0.384996	0.538526	CsaV3_5G003480	CsaV3_5G003480	1
MF	GO:0140101	catalytic activity, acting on a tRNA	27030	62/9200	0.394915	0.538526	CsaV3_UNG103770	CsaV3_UNG103770	1
MF	GO:0140110	transcription regulator activity	27120	397/9200	0.397043	0.538526	CsaV3_3G035470/CsaV3_3G041670/CsaV3_4G026790/CsaV3_UNG150160	CsaV3_3G035470/CsaV3_3G041670/CsaV3_4G026790/CsaV3_UNG150160	4
MF	GO:0046982	protein heterodimerization activity	27030	63/9200	0.399815	0.538526	CsaV3_3G004290	CsaV3_3G004290	1
MF	GO:0016757	transferase activity, transferring glycosyl groups	27089	302/9200	0.440162	0.581014	CsaV3_2G005230/CsaV3_3G020200/CsaV3_4G025670	CsaV3_2G005230/CsaV3_3G020200/CsaV3_4G025670	3
MF	GO:0016874	ligase activity	27030	81/9200	0.481611	0.620445	CsaV3_UNG103770	CsaV3_UNG103770	1
MF	GO:0008194	UDP-glycosyltransferase activity	27030	85/9200	0.498236	0.620445	CsaV3_3G020200	CsaV3_3G020200	1
MF	GO:0016779	nucleotidyltransferase activity	27030	85/9200	0.498236	0.620445	CsaV3_1G046360	CsaV3_1G046360	1
MF	GO:0008270	zinc ion binding	27089	335/9200	0.508869	0.621951	CsaV3_2G029100/CsaV3_7G007320/CsaV3_UNG159170	CsaV3_2G029100/CsaV3_7G007320/CsaV3_UNG159170	3
MF	GO:0004601	peroxidase activity	27030	99/9200	0.552389	0.658213	CsaV3_4G023650	CsaV3_4G023650	1
MF	GO:0016684	oxidoreductase activity, acting on peroxide as acceptor	27030	101/9200	0.559639	0.658213	CsaV3_4G023650	CsaV3_4G023650	1
MF	GO:0016209	antioxidant activity	27030	105/9200	0.573793	0.658213	CsaV3_4G023650	CsaV3_4G023650	1
MF	GO:0003700	DNA binding transcription factor activity	27089	374/9200	0.58423	0.658213	CsaV3_3G035470/CsaV3_3G041670/CsaV3_4G026790	CsaV3_3G035470/CsaV3_3G041670/CsaV3_4G026790	3
MF	GO:0016758	transferase activity, transferring hexosyl groups	27061	244/9200	0.588403	0.658213	CsaV3_3G020200/CsaV3_4G025670	CsaV3_3G020200/CsaV3_4G025670	2
MF	GO:0009055	electron transfer activity	27030	115/9200	0.607244	0.667968	CsaV3_1G030380	CsaV3_1G030380	1
MF	GO:0050662	coenzyme binding	27061	275/9200	0.653957	0.70665	CsaV3_1G037470/CsaV3_3G011490	CsaV3_1G037470/CsaV3_3G011490	2
MF	GO:0005509	calcium ion binding	27030	134/9200	0.663822	0.70665	CsaV3_2G004190	CsaV3_2G004190	1
MF	GO:0016614	oxidoreductase activity, acting on CH-OH group of donors	27030	142/9200	0.685165	0.717792	CsaV3_1G037470	CsaV3_1G037470	1
MF	GO:0022857	transmembrane transporter activity	27061	363/9200	0.795799	0.820667	CsaV3_3G012150/CsaV3_6G003610	CsaV3_3G012150/CsaV3_6G003610	2
MF	GO:0046983	protein dimerization activity	27030	271/9200	0.891553	0.904054	CsaV3_3G004290	CsaV3_3G004290	1
MF	GO:0005215	transporter activity	27061	479/9200	0.904054	0.904054	CsaV3_3G012150/CsaV3_6G003610	CsaV3_3G012150/CsaV3_6G003610	2

## Sheet: MEgreen_GO Enrichment
Category	GOID	Description	GeneRatio	BgRatio	pvalue	padj	geneID	geneName	Count
BP	GO:0006260	DNA replication	20/504	46/6278	6.68026e-11	1.8446e-08	CsaV3_1G002970/CsaV3_1G006150/CsaV3_2G003500/CsaV3_2G010800/CsaV3_2G016060/CsaV3_2G031090/CsaV3_3G003530/CsaV3_4G012080/CsaV3_4G012090/CsaV3_4G028050/CsaV3_4G031600/CsaV3_5G035370/CsaV3_5G039570/CsaV3_6G008170/CsaV3_6G042080/CsaV3_6G051630/CsaV3_6G053180/CsaV3_7G000210/CsaV3_7G026150/CsaV3_7G029940	CsaV3_1G002970/CsaV3_1G006150/CsaV3_2G003500/CsaV3_2G010800/CsaV3_2G016060/CsaV3_2G031090/CsaV3_3G003530/CsaV3_4G012080/CsaV3_4G012090/CsaV3_4G028050/CsaV3_4G031600/CsaV3_5G035370/CsaV3_5G039570/CsaV3_6G008170/CsaV3_6G042080/CsaV3_6G051630/CsaV3_6G053180/CsaV3_7G000210/CsaV3_7G026150/CsaV3_7G029940	20
BP	GO:0006259	DNA metabolic process	34/504	126/6278	1.1636e-10	1.8446e-08	CsaV3_1G002970/CsaV3_1G006150/CsaV3_1G008250/CsaV3_1G032850/CsaV3_2G002320/CsaV3_2G003500/CsaV3_2G010800/CsaV3_2G016060/CsaV3_2G022190/CsaV3_2G031090/CsaV3_2G031500/CsaV3_3G000200/CsaV3_3G003530/CsaV3_3G033440/CsaV3_3G042180/CsaV3_4G012030/CsaV3_4G012080/CsaV3_4G012090/CsaV3_4G028050/CsaV3_4G031600/CsaV3_4G034020/CsaV3_5G035370/CsaV3_5G039570/CsaV3_6G007600/CsaV3_6G008170/CsaV3_6G014300/CsaV3_6G0…	CsaV3_1G002970/CsaV3_1G006150/CsaV3_1G008250/CsaV3_1G032850/CsaV3_2G002320/CsaV3_2G003500/CsaV3_2G010800/CsaV3_2G016060/CsaV3_2G022190/CsaV3_2G031090/CsaV3_2G031500/CsaV3_3G000200/CsaV3_3G003530/CsaV3_3G033440/CsaV3_3G042180/CsaV3_4G012030/CsaV3_4G012080/CsaV3_4G012090/CsaV3_4G028050/CsaV3_4G031600/CsaV3_4G034020/CsaV3_5G035370/CsaV3_5G039570/CsaV3_6G007600/CsaV3_6G008170/CsaV3_6G014300/CsaV3_6G0…	34
BP	GO:1901566	organonitrogen compound biosynthetic process	80/504	488/6278	1.45626e-10	1.8446e-08	CsaV3_1G002460/CsaV3_1G003090/CsaV3_1G008060/CsaV3_1G010170/CsaV3_1G010720/CsaV3_1G035920/CsaV3_1G037190/CsaV3_1G038230/CsaV3_2G001620/CsaV3_2G008510/CsaV3_2G013320/CsaV3_2G013510/CsaV3_2G014210/CsaV3_2G019510/CsaV3_2G028140/CsaV3_2G030420/CsaV3_2G032570/CsaV3_2G034130/CsaV3_3G002360/CsaV3_3G004760/CsaV3_3G004770/CsaV3_3G007170/CsaV3_3G009100/CsaV3_3G010470/CsaV3_3G011000/CsaV3_3G012600/CsaV3_3G0…	CsaV3_1G002460/CsaV3_1G003090/CsaV3_1G008060/CsaV3_1G010170/CsaV3_1G010720/CsaV3_1G035920/CsaV3_1G037190/CsaV3_1G038230/CsaV3_2G001620/CsaV3_2G008510/CsaV3_2G013320/CsaV3_2G013510/CsaV3_2G014210/CsaV3_2G019510/CsaV3_2G028140/CsaV3_2G030420/CsaV3_2G032570/CsaV3_2G034130/CsaV3_3G002360/CsaV3_3G004760/CsaV3_3G004770/CsaV3_3G007170/CsaV3_3G009100/CsaV3_3G010470/CsaV3_3G011000/CsaV3_3G012600/CsaV3_3G0…	80
BP	GO:0043604	amide biosynthetic process	54/504	286/6278	1.24415e-09	1.18195e-07	CsaV3_1G002460/CsaV3_1G038230/CsaV3_2G001620/CsaV3_2G008510/CsaV3_2G013510/CsaV3_2G019510/CsaV3_2G032570/CsaV3_2G034130/CsaV3_3G002360/CsaV3_3G004770/CsaV3_3G009100/CsaV3_3G011000/CsaV3_3G012600/CsaV3_3G014650/CsaV3_3G015690/CsaV3_3G017240/CsaV3_3G019240/CsaV3_3G020570/CsaV3_3G022680/CsaV3_3G032360/CsaV3_3G032940/CsaV3_3G033100/CsaV3_3G042510/CsaV3_4G003190/CsaV3_4G004050/CsaV3_4G004440/CsaV3_4G0…	CsaV3_1G002460/CsaV3_1G038230/CsaV3_2G001620/CsaV3_2G008510/CsaV3_2G013510/CsaV3_2G019510/CsaV3_2G032570/CsaV3_2G034130/CsaV3_3G002360/CsaV3_3G004770/CsaV3_3G009100/CsaV3_3G011000/CsaV3_3G012600/CsaV3_3G014650/CsaV3_3G015690/CsaV3_3G017240/CsaV3_3G019240/CsaV3_3G020570/CsaV3_3G022680/CsaV3_3G032360/CsaV3_3G032940/CsaV3_3G033100/CsaV3_3G042510/CsaV3_4G003190/CsaV3_4G004050/CsaV3_4G004440/CsaV3_4G0…	54
BP	GO:0043043	peptide biosynthetic process	52/504	274/6278	2.14484e-09	1.63008e-07	CsaV3_1G002460/CsaV3_1G038230/CsaV3_2G001620/CsaV3_2G008510/CsaV3_2G013510/CsaV3_2G019510/CsaV3_2G032570/CsaV3_2G034130/CsaV3_3G002360/CsaV3_3G004770/CsaV3_3G011000/CsaV3_3G012600/CsaV3_3G014650/CsaV3_3G015690/CsaV3_3G017240/CsaV3_3G019240/CsaV3_3G020570/CsaV3_3G022680/CsaV3_3G032360/CsaV3_3G032940/CsaV3_3G033100/CsaV3_3G042510/CsaV3_4G003190/CsaV3_4G004050/CsaV3_4G004440/CsaV3_4G008470/CsaV3_4G0…	CsaV3_1G002460/CsaV3_1G038230/CsaV3_2G001620/CsaV3_2G008510/CsaV3_2G013510/CsaV3_2G019510/CsaV3_2G032570/CsaV3_2G034130/CsaV3_3G002360/CsaV3_3G004770/CsaV3_3G011000/CsaV3_3G012600/CsaV3_3G014650/CsaV3_3G015690/CsaV3_3G017240/CsaV3_3G019240/CsaV3_3G020570/CsaV3_3G022680/CsaV3_3G032360/CsaV3_3G032940/CsaV3_3G033100/CsaV3_3G042510/CsaV3_4G003190/CsaV3_4G004050/CsaV3_4G004440/CsaV3_4G008470/CsaV3_4G0…	52
BP	GO:0006412	translation	51/504	271/6278	4.195e-09	2.55152e-07	CsaV3_1G002460/CsaV3_1G038230/CsaV3_2G001620/CsaV3_2G008510/CsaV3_2G013510/CsaV3_2G019510/CsaV3_2G032570/CsaV3_2G034130/CsaV3_3G002360/CsaV3_3G004770/CsaV3_3G011000/CsaV3_3G012600/CsaV3_3G014650/CsaV3_3G015690/CsaV3_3G017240/CsaV3_3G019240/CsaV3_3G020570/CsaV3_3G022680/CsaV3_3G032360/CsaV3_3G032940/CsaV3_3G033100/CsaV3_3G042510/CsaV3_4G003190/CsaV3_4G004050/CsaV3_4G004440/CsaV3_4G008470/CsaV3_4G0…	CsaV3_1G002460/CsaV3_1G038230/CsaV3_2G001620/CsaV3_2G008510/CsaV3_2G013510/CsaV3_2G019510/CsaV3_2G032570/CsaV3_2G034130/CsaV3_3G002360/CsaV3_3G004770/CsaV3_3G011000/CsaV3_3G012600/CsaV3_3G014650/CsaV3_3G015690/CsaV3_3G017240/CsaV3_3G019240/CsaV3_3G020570/CsaV3_3G022680/CsaV3_3G032360/CsaV3_3G032940/CsaV3_3G033100/CsaV3_3G042510/CsaV3_4G003190/CsaV3_4G004050/CsaV3_4G004440/CsaV3_4G008470/CsaV3_4G0…	51
BP	GO:0043603	cellular amide metabolic process	54/504	297/6278	5.12322e-09	2.55152e-07	CsaV3_1G002460/CsaV3_1G038230/CsaV3_2G001620/CsaV3_2G008510/CsaV3_2G013510/CsaV3_2G019510/CsaV3_2G032570/CsaV3_2G034130/CsaV3_3G002360/CsaV3_3G004770/CsaV3_3G009100/CsaV3_3G011000/CsaV3_3G012600/CsaV3_3G014650/CsaV3_3G015690/CsaV3_3G017240/CsaV3_3G019240/CsaV3_3G020570/CsaV3_3G022680/CsaV3_3G032360/CsaV3_3G032940/CsaV3_3G033100/CsaV3_3G042510/CsaV3_4G003190/CsaV3_4G004050/CsaV3_4G004440/CsaV3_4G0…	CsaV3_1G002460/CsaV3_1G038230/CsaV3_2G001620/CsaV3_2G008510/CsaV3_2G013510/CsaV3_2G019510/CsaV3_2G032570/CsaV3_2G034130/CsaV3_3G002360/CsaV3_3G004770/CsaV3_3G009100/CsaV3_3G011000/CsaV3_3G012600/CsaV3_3G014650/CsaV3_3G015690/CsaV3_3G017240/CsaV3_3G019240/CsaV3_3G020570/CsaV3_3G022680/CsaV3_3G032360/CsaV3_3G032940/CsaV3_3G033100/CsaV3_3G042510/CsaV3_4G003190/CsaV3_4G004050/CsaV3_4G004440/CsaV3_4G0…	54
BP	GO:0006518	peptide metabolic process	52/504	281/6278	5.37161e-09	2.55152e-07	CsaV3_1G002460/CsaV3_1G038230/CsaV3_2G001620/CsaV3_2G008510/CsaV3_2G013510/CsaV3_2G019510/CsaV3_2G032570/CsaV3_2G034130/CsaV3_3G002360/CsaV3_3G004770/CsaV3_3G011000/CsaV3_3G012600/CsaV3_3G014650/CsaV3_3G015690/CsaV3_3G017240/CsaV3_3G019240/CsaV3_3G020570/CsaV3_3G022680/CsaV3_3G032360/CsaV3_3G032940/CsaV3_3G033100/CsaV3_3G042510/CsaV3_4G003190/CsaV3_4G004050/CsaV3_4G004440/CsaV3_4G008470/CsaV3_4G0…	CsaV3_1G002460/CsaV3_1G038230/CsaV3_2G001620/CsaV3_2G008510/CsaV3_2G013510/CsaV3_2G019510/CsaV3_2G032570/CsaV3_2G034130/CsaV3_3G002360/CsaV3_3G004770/CsaV3_3G011000/CsaV3_3G012600/CsaV3_3G014650/CsaV3_3G015690/CsaV3_3G017240/CsaV3_3G019240/CsaV3_3G020570/CsaV3_3G022680/CsaV3_3G032360/CsaV3_3G032940/CsaV3_3G033100/CsaV3_3G042510/CsaV3_4G003190/CsaV3_4G004050/CsaV3_4G004440/CsaV3_4G008470/CsaV3_4G0…	52
BP	GO:0006281	DNA repair	15/504	63/6278	9.89281e-05	0.00417696	CsaV3_1G008250/CsaV3_1G032850/CsaV3_2G002320/CsaV3_2G022190/CsaV3_2G031500/CsaV3_3G000200/CsaV3_3G033440/CsaV3_3G042180/CsaV3_4G012030/CsaV3_4G012080/CsaV3_4G012090/CsaV3_5G035370/CsaV3_6G007600/CsaV3_6G014300/CsaV3_7G029150	CsaV3_1G008250/CsaV3_1G032850/CsaV3_2G002320/CsaV3_2G022190/CsaV3_2G031500/CsaV3_3G000200/CsaV3_3G033440/CsaV3_3G042180/CsaV3_4G012030/CsaV3_4G012080/CsaV3_4G012090/CsaV3_5G035370/CsaV3_6G007600/CsaV3_6G014300/CsaV3_7G029150	15
BP	GO:0006974	cellular response to DNA damage stimulus	15/504	65/6278	0.000144549	0.00499351	CsaV3_1G008250/CsaV3_1G032850/CsaV3_2G002320/CsaV3_2G022190/CsaV3_2G031500/CsaV3_3G000200/CsaV3_3G033440/CsaV3_3G042180/CsaV3_4G012030/CsaV3_4G012080/CsaV3_4G012090/CsaV3_5G035370/CsaV3_6G007600/CsaV3_6G014300/CsaV3_7G029150	CsaV3_1G008250/CsaV3_1G032850/CsaV3_2G002320/CsaV3_2G022190/CsaV3_2G031500/CsaV3_3G000200/CsaV3_3G033440/CsaV3_3G042180/CsaV3_4G012030/CsaV3_4G012080/CsaV3_4G012090/CsaV3_5G035370/CsaV3_6G007600/CsaV3_6G014300/CsaV3_7G029150	15
BP	GO:0033554	cellular response to stress	15/504	65/6278	0.000144549	0.00499351	CsaV3_1G008250/CsaV3_1G032850/CsaV3_2G002320/CsaV3_2G022190/CsaV3_2G031500/CsaV3_3G000200/CsaV3_3G033440/CsaV3_3G042180/CsaV3_4G012030/CsaV3_4G012080/CsaV3_4G012090/CsaV3_5G035370/CsaV3_6G007600/CsaV3_6G014300/CsaV3_7G029150	CsaV3_1G008250/CsaV3_1G032850/CsaV3_2G002320/CsaV3_2G022190/CsaV3_2G031500/CsaV3_3G000200/CsaV3_3G033440/CsaV3_3G042180/CsaV3_4G012030/CsaV3_4G012080/CsaV3_4G012090/CsaV3_5G035370/CsaV3_6G007600/CsaV3_6G014300/CsaV3_7G029150	15
BP	GO:0006164	purine nucleotide biosynthetic process	13/504	56/6278	0.000373825	0.0118378	CsaV3_1G003090/CsaV3_1G010170/CsaV3_1G035920/CsaV3_2G013320/CsaV3_2G030420/CsaV3_3G007170/CsaV3_3G010470/CsaV3_3G021780/CsaV3_5G002770/CsaV3_5G034810/CsaV3_5G036470/CsaV3_6G040430/CsaV3_UNG052430	CsaV3_1G003090/CsaV3_1G010170/CsaV3_1G035920/CsaV3_2G013320/CsaV3_2G030420/CsaV3_3G007170/CsaV3_3G010470/CsaV3_3G021780/CsaV3_5G002770/CsaV3_5G034810/CsaV3_5G036470/CsaV3_6G040430/CsaV3_UNG052430	13
BP	GO:0072522	purine-containing compound biosynthetic process	13/504	57/6278	0.000449565	0.0131411	CsaV3_1G003090/CsaV3_1G010170/CsaV3_1G035920/CsaV3_2G013320/CsaV3_2G030420/CsaV3_3G007170/CsaV3_3G010470/CsaV3_3G021780/CsaV3_5G002770/CsaV3_5G034810/CsaV3_5G036470/CsaV3_6G040430/CsaV3_UNG052430	CsaV3_1G003090/CsaV3_1G010170/CsaV3_1G035920/CsaV3_2G013320/CsaV3_2G030420/CsaV3_3G007170/CsaV3_3G010470/CsaV3_3G021780/CsaV3_5G002770/CsaV3_5G034810/CsaV3_5G036470/CsaV3_6G040430/CsaV3_UNG052430	13
BP	GO:0009152	purine ribonucleotide biosynthetic process	12/504	54/6278	0.000948111	0.0222616	CsaV3_1G003090/CsaV3_1G035920/CsaV3_2G013320/CsaV3_2G030420/CsaV3_3G007170/CsaV3_3G010470/CsaV3_3G021780/CsaV3_5G002770/CsaV3_5G034810/CsaV3_5G036470/CsaV3_6G040430/CsaV3_UNG052430	CsaV3_1G003090/CsaV3_1G035920/CsaV3_2G013320/CsaV3_2G030420/CsaV3_3G007170/CsaV3_3G010470/CsaV3_3G021780/CsaV3_5G002770/CsaV3_5G034810/CsaV3_5G036470/CsaV3_6G040430/CsaV3_UNG052430	12
BP	GO:0009260	ribonucleotide biosynthetic process	12/504	54/6278	0.000948111	0.0222616	CsaV3_1G003090/CsaV3_1G035920/CsaV3_2G013320/CsaV3_2G030420/CsaV3_3G007170/CsaV3_3G010470/CsaV3_3G021780/CsaV3_5G002770/CsaV3_5G034810/CsaV3_5G036470/CsaV3_6G040430/CsaV3_UNG052430	CsaV3_1G003090/CsaV3_1G035920/CsaV3_2G013320/CsaV3_2G030420/CsaV3_3G007170/CsaV3_3G010470/CsaV3_3G021780/CsaV3_5G002770/CsaV3_5G034810/CsaV3_5G036470/CsaV3_6G040430/CsaV3_UNG052430	12
BP	GO:0046390	ribose phosphate biosynthetic process	12/504	54/6278	0.000948111	0.0222616	CsaV3_1G003090/CsaV3_1G035920/CsaV3_2G013320/CsaV3_2G030420/CsaV3_3G007170/CsaV3_3G010470/CsaV3_3G021780/CsaV3_5G002770/CsaV3_5G034810/CsaV3_5G036470/CsaV3_6G040430/CsaV3_UNG052430	CsaV3_1G003090/CsaV3_1G035920/CsaV3_2G013320/CsaV3_2G030420/CsaV3_3G007170/CsaV3_3G010470/CsaV3_3G021780/CsaV3_5G002770/CsaV3_5G034810/CsaV3_5G036470/CsaV3_6G040430/CsaV3_UNG052430	12
BP	GO:0009142	nucleoside triphosphate biosynthetic process	11/504	48/6278	0.00117166	0.0222616	CsaV3_1G003090/CsaV3_1G035920/CsaV3_2G013320/CsaV3_2G030420/CsaV3_3G007170/CsaV3_3G010470/CsaV3_3G021780/CsaV3_5G034810/CsaV3_5G036470/CsaV3_6G040430/CsaV3_UNG052430	CsaV3_1G003090/CsaV3_1G035920/CsaV3_2G013320/CsaV3_2G030420/CsaV3_3G007170/CsaV3_3G010470/CsaV3_3G021780/CsaV3_5G034810/CsaV3_5G036470/CsaV3_6G040430/CsaV3_UNG052430	11
BP	GO:0009145	purine nucleoside triphosphate biosynthetic process	11/504	48/6278	0.00117166	0.0222616	CsaV3_1G003090/CsaV3_1G035920/CsaV3_2G013320/CsaV3_2G030420/CsaV3_3G007170/CsaV3_3G010470/CsaV3_3G021780/CsaV3_5G034810/CsaV3_5G036470/CsaV3_6G040430/CsaV3_UNG052430	CsaV3_1G003090/CsaV3_1G035920/CsaV3_2G013320/CsaV3_2G030420/CsaV3_3G007170/CsaV3_3G010470/CsaV3_3G021780/CsaV3_5G034810/CsaV3_5G036470/CsaV3_6G040430/CsaV3_UNG052430	11
BP	GO:0009201	ribonucleoside triphosphate biosynthetic process	11/504	48/6278	0.00117166	0.0222616	CsaV3_1G003090/CsaV3_1G035920/CsaV3_2G013320/CsaV3_2G030420/CsaV3_3G007170/CsaV3_3G010470/CsaV3_3G021780/CsaV3_5G034810/CsaV3_5G036470/CsaV3_6G040430/CsaV3_UNG052430	CsaV3_1G003090/CsaV3_1G035920/CsaV3_2G013320/CsaV3_2G030420/CsaV3_3G007170/CsaV3_3G010470/CsaV3_3G021780/CsaV3_5G034810/CsaV3_5G036470/CsaV3_6G040430/CsaV3_UNG052430	11
BP	GO:0009206	purine ribonucleoside triphosphate biosynthetic process	11/504	48/6278	0.00117166	0.0222616	CsaV3_1G003090/CsaV3_1G035920/CsaV3_2G013320/CsaV3_2G030420/CsaV3_3G007170/CsaV3_3G010470/CsaV3_3G021780/CsaV3_5G034810/CsaV3_5G036470/CsaV3_6G040430/CsaV3_UNG052430	CsaV3_1G003090/CsaV3_1G035920/CsaV3_2G013320/CsaV3_2G030420/CsaV3_3G007170/CsaV3_3G010470/CsaV3_3G021780/CsaV3_5G034810/CsaV3_5G036470/CsaV3_6G040430/CsaV3_UNG052430	11
BP	GO:0009127	purine nucleoside monophosphate biosynthetic process	11/504	49/6278	0.00140398	0.0231962	CsaV3_1G003090/CsaV3_1G035920/CsaV3_2G013320/CsaV3_2G030420/CsaV3_3G010470/CsaV3_3G021780/CsaV3_5G002770/CsaV3_5G034810/CsaV3_5G036470/CsaV3_6G040430/CsaV3_UNG052430	CsaV3_1G003090/CsaV3_1G035920/CsaV3_2G013320/CsaV3_2G030420/CsaV3_3G010470/CsaV3_3G021780/CsaV3_5G002770/CsaV3_5G034810/CsaV3_5G036470/CsaV3_6G040430/CsaV3_UNG052430	11
BP	GO:0009156	ribonucleoside monophosphate biosynthetic process	11/504	49/6278	0.00140398	0.0231962	CsaV3_1G003090/CsaV3_1G035920/CsaV3_2G013320/CsaV3_2G030420/CsaV3_3G010470/CsaV3_3G021780/CsaV3_5G002770/CsaV3_5G034810/CsaV3_5G036470/CsaV3_6G040430/CsaV3_UNG052430	CsaV3_1G003090/CsaV3_1G035920/CsaV3_2G013320/CsaV3_2G030420/CsaV3_3G010470/CsaV3_3G021780/CsaV3_5G002770/CsaV3_5G034810/CsaV3_5G036470/CsaV3_6G040430/CsaV3_UNG052430	11
BP	GO:0009168	purine ribonucleoside monophosphate biosynthetic process	11/504	49/6278	0.00140398	0.0231962	CsaV3_1G003090/CsaV3_1G035920/CsaV3_2G013320/CsaV3_2G030420/CsaV3_3G010470/CsaV3_3G021780/CsaV3_5G002770/CsaV3_5G034810/CsaV3_5G036470/CsaV3_6G040430/CsaV3_UNG052430	CsaV3_1G003090/CsaV3_1G035920/CsaV3_2G013320/CsaV3_2G030420/CsaV3_3G010470/CsaV3_3G021780/CsaV3_5G002770/CsaV3_5G034810/CsaV3_5G036470/CsaV3_6G040430/CsaV3_UNG052430	11
BP	GO:0009124	nucleoside monophosphate biosynthetic process	11/504	50/6278	0.00167276	0.0264854	CsaV3_1G003090/CsaV3_1G035920/CsaV3_2G013320/CsaV3_2G030420/CsaV3_3G010470/CsaV3_3G021780/CsaV3_5G002770/CsaV3_5G034810/CsaV3_5G036470/CsaV3_6G040430/CsaV3_UNG052430	CsaV3_1G003090/CsaV3_1G035920/CsaV3_2G013320/CsaV3_2G030420/CsaV3_3G010470/CsaV3_3G021780/CsaV3_5G002770/CsaV3_5G034810/CsaV3_5G036470/CsaV3_6G040430/CsaV3_UNG052430	11
BP	GO:0009141	nucleoside triphosphate metabolic process	12/504	58/6278	0.0018353	0.0278966	CsaV3_1G003090/CsaV3_1G035920/CsaV3_2G013320/CsaV3_2G028630/CsaV3_2G030420/CsaV3_3G007170/CsaV3_3G010470/CsaV3_3G021780/CsaV3_5G034810/CsaV3_5G036470/CsaV3_6G040430/CsaV3_UNG052430	CsaV3_1G003090/CsaV3_1G035920/CsaV3_2G013320/CsaV3_2G028630/CsaV3_2G030420/CsaV3_3G007170/CsaV3_3G010470/CsaV3_3G021780/CsaV3_5G034810/CsaV3_5G036470/CsaV3_6G040430/CsaV3_UNG052430	12
BP	GO:0009132	nucleoside diphosphate metabolic process	8/504	31/6278	0.0024586	0.0359334	CsaV3_1G003090/CsaV3_1G035920/CsaV3_2G013320/CsaV3_2G030420/CsaV3_3G007170/CsaV3_3G021780/CsaV3_3G027630/CsaV3_6G040430	CsaV3_1G003090/CsaV3_1G035920/CsaV3_2G013320/CsaV3_2G030420/CsaV3_3G007170/CsaV3_3G021780/CsaV3_3G027630/CsaV3_6G040430	8
BP	GO:0006754	ATP biosynthetic process	10/504	46/6278	0.00295511	0.0384057	CsaV3_1G003090/CsaV3_1G035920/CsaV3_2G013320/CsaV3_2G030420/CsaV3_3G010470/CsaV3_3G021780/CsaV3_5G034810/CsaV3_5G036470/CsaV3_6G040430/CsaV3_UNG052430	CsaV3_1G003090/CsaV3_1G035920/CsaV3_2G013320/CsaV3_2G030420/CsaV3_3G010470/CsaV3_3G021780/CsaV3_5G034810/CsaV3_5G036470/CsaV3_6G040430/CsaV3_UNG052430	10
BP	GO:0055086	nucleobase-containing small molecule metabolic process	18/504	111/6278	0.00296098	0.0384057	CsaV3_1G003090/CsaV3_1G010170/CsaV3_1G035920/CsaV3_2G013320/CsaV3_2G028630/CsaV3_2G030420/CsaV3_3G007170/CsaV3_3G010470/CsaV3_3G021780/CsaV3_3G027630/CsaV3_4G006330/CsaV3_5G002770/CsaV3_5G014110/CsaV3_5G034810/CsaV3_5G036470/CsaV3_6G040430/CsaV3_7G000760/CsaV3_UNG052430	CsaV3_1G003090/CsaV3_1G010170/CsaV3_1G035920/CsaV3_2G013320/CsaV3_2G028630/CsaV3_2G030420/CsaV3_3G007170/CsaV3_3G010470/CsaV3_3G021780/CsaV3_3G027630/CsaV3_4G006330/CsaV3_5G002770/CsaV3_5G014110/CsaV3_5G034810/CsaV3_5G036470/CsaV3_6G040430/CsaV3_7G000760/CsaV3_UNG052430	18
BP	GO:0016053	organic acid biosynthetic process	19/504	120/6278	0.00303203	0.0384057	CsaV3_1G003090/CsaV3_1G009790/CsaV3_1G035920/CsaV3_1G037190/CsaV3_2G013320/CsaV3_2G014210/CsaV3_2G030420/CsaV3_3G004760/CsaV3_3G009100/CsaV3_3G010300/CsaV3_3G021780/CsaV3_3G043020/CsaV3_5G008630/CsaV3_5G023610/CsaV3_5G023920/CsaV3_5G029840/CsaV3_6G040430/CsaV3_7G005980/CsaV3_7G021780	CsaV3_1G003090/CsaV3_1G009790/CsaV3_1G035920/CsaV3_1G037190/CsaV3_2G013320/CsaV3_2G014210/CsaV3_2G030420/CsaV3_3G004760/CsaV3_3G009100/CsaV3_3G010300/CsaV3_3G021780/CsaV3_3G043020/CsaV3_5G008630/CsaV3_5G023610/CsaV3_5G023920/CsaV3_5G029840/CsaV3_6G040430/CsaV3_7G005980/CsaV3_7G021780	19
BP	GO:0046394	carboxylic acid biosynthetic process	19/504	120/6278	0.00303203	0.0384057	CsaV3_1G003090/CsaV3_1G009790/CsaV3_1G035920/CsaV3_1G037190/CsaV3_2G013320/CsaV3_2G014210/CsaV3_2G030420/CsaV3_3G004760/CsaV3_3G009100/CsaV3_3G010300/CsaV3_3G021780/CsaV3_3G043020/CsaV3_5G008630/CsaV3_5G023610/CsaV3_5G023920/CsaV3_5G029840/CsaV3_6G040430/CsaV3_7G005980/CsaV3_7G021780	CsaV3_1G003090/CsaV3_1G009790/CsaV3_1G035920/CsaV3_1G037190/CsaV3_2G013320/CsaV3_2G014210/CsaV3_2G030420/CsaV3_3G004760/CsaV3_3G009100/CsaV3_3G010300/CsaV3_3G021780/CsaV3_3G043020/CsaV3_5G008630/CsaV3_5G023610/CsaV3_5G023920/CsaV3_5G029840/CsaV3_6G040430/CsaV3_7G005980/CsaV3_7G021780	19
BP	GO:0009165	nucleotide biosynthetic process	13/504	70/6278	0.00332649	0.0388694	CsaV3_1G003090/CsaV3_1G010170/CsaV3_1G035920/CsaV3_2G013320/CsaV3_2G030420/CsaV3_3G007170/CsaV3_3G010470/CsaV3_3G021780/CsaV3_5G002770/CsaV3_5G034810/CsaV3_5G036470/CsaV3_6G040430/CsaV3_UNG052430	CsaV3_1G003090/CsaV3_1G010170/CsaV3_1G035920/CsaV3_2G013320/CsaV3_2G030420/CsaV3_3G007170/CsaV3_3G010470/CsaV3_3G021780/CsaV3_5G002770/CsaV3_5G034810/CsaV3_5G036470/CsaV3_6G040430/CsaV3_UNG052430	13
BP	GO:1901293	nucleoside phosphate biosynthetic process	13/504	70/6278	0.00332649	0.0388694	CsaV3_1G003090/CsaV3_1G010170/CsaV3_1G035920/CsaV3_2G013320/CsaV3_2G030420/CsaV3_3G007170/CsaV3_3G010470/CsaV3_3G021780/CsaV3_5G002770/CsaV3_5G034810/CsaV3_5G036470/CsaV3_6G040430/CsaV3_UNG052430	CsaV3_1G003090/CsaV3_1G010170/CsaV3_1G035920/CsaV3_2G013320/CsaV3_2G030420/CsaV3_3G007170/CsaV3_3G010470/CsaV3_3G021780/CsaV3_5G002770/CsaV3_5G034810/CsaV3_5G036470/CsaV3_6G040430/CsaV3_UNG052430	13
BP	GO:0044281	small molecule metabolic process	43/504	353/6278	0.0033755	0.0388694	CsaV3_1G003090/CsaV3_1G009790/CsaV3_1G010170/CsaV3_1G035920/CsaV3_1G037190/CsaV3_1G038230/CsaV3_2G008510/CsaV3_2G011670/CsaV3_2G013320/CsaV3_2G014210/CsaV3_2G028630/CsaV3_2G030420/CsaV3_3G002020/CsaV3_3G004760/CsaV3_3G007170/CsaV3_3G009100/CsaV3_3G010300/CsaV3_3G010470/CsaV3_3G014650/CsaV3_3G021780/CsaV3_3G023420/CsaV3_3G027630/CsaV3_3G043020/CsaV3_3G043270/CsaV3_4G003190/CsaV3_4G006330/CsaV3_4G0…	CsaV3_1G003090/CsaV3_1G009790/CsaV3_1G010170/CsaV3_1G035920/CsaV3_1G037190/CsaV3_1G038230/CsaV3_2G008510/CsaV3_2G011670/CsaV3_2G013320/CsaV3_2G014210/CsaV3_2G028630/CsaV3_2G030420/CsaV3_3G002020/CsaV3_3G004760/CsaV3_3G007170/CsaV3_3G009100/CsaV3_3G010300/CsaV3_3G010470/CsaV3_3G014650/CsaV3_3G021780/CsaV3_3G023420/CsaV3_3G027630/CsaV3_3G043020/CsaV3_3G043270/CsaV3_4G003190/CsaV3_4G006330/CsaV3_4G0…	43
BP	GO:0006753	nucleoside phosphate metabolic process	16/504	96/6278	0.00374821	0.0418917	CsaV3_1G003090/CsaV3_1G010170/CsaV3_1G035920/CsaV3_2G013320/CsaV3_2G028630/CsaV3_2G030420/CsaV3_3G007170/CsaV3_3G010470/CsaV3_3G021780/CsaV3_3G027630/CsaV3_4G006330/CsaV3_5G002770/CsaV3_5G034810/CsaV3_5G036470/CsaV3_6G040430/CsaV3_UNG052430	CsaV3_1G003090/CsaV3_1G010170/CsaV3_1G035920/CsaV3_2G013320/CsaV3_2G028630/CsaV3_2G030420/CsaV3_3G007170/CsaV3_3G010470/CsaV3_3G021780/CsaV3_3G027630/CsaV3_4G006330/CsaV3_5G002770/CsaV3_5G034810/CsaV3_5G036470/CsaV3_6G040430/CsaV3_UNG052430	16
BP	GO:0034404	nucleobase-containing small molecule biosynthetic process	8/504	34/6278	0.00457056	0.044822	CsaV3_1G003090/CsaV3_1G035920/CsaV3_2G013320/CsaV3_2G030420/CsaV3_3G007170/CsaV3_3G021780/CsaV3_5G002770/CsaV3_6G040430	CsaV3_1G003090/CsaV3_1G035920/CsaV3_2G013320/CsaV3_2G030420/CsaV3_3G007170/CsaV3_3G021780/CsaV3_5G002770/CsaV3_6G040430	8
BP	GO:0006163	purine nucleotide metabolic process	13/504	73/6278	0.00484591	0.044822	CsaV3_1G003090/CsaV3_1G010170/CsaV3_1G035920/CsaV3_2G013320/CsaV3_2G030420/CsaV3_3G007170/CsaV3_3G010470/CsaV3_3G021780/CsaV3_5G002770/CsaV3_5G034810/CsaV3_5G036470/CsaV3_6G040430/CsaV3_UNG052430	CsaV3_1G003090/CsaV3_1G010170/CsaV3_1G035920/CsaV3_2G013320/CsaV3_2G030420/CsaV3_3G007170/CsaV3_3G010470/CsaV3_3G021780/CsaV3_5G002770/CsaV3_5G034810/CsaV3_5G036470/CsaV3_6G040430/CsaV3_UNG052430	13
BP	GO:0009126	purine nucleoside monophosphate metabolic process	11/504	57/6278	0.00495401	0.044822	CsaV3_1G003090/CsaV3_1G035920/CsaV3_2G013320/CsaV3_2G030420/CsaV3_3G010470/CsaV3_3G021780/CsaV3_5G002770/CsaV3_5G034810/CsaV3_5G036470/CsaV3_6G040430/CsaV3_UNG052430	CsaV3_1G003090/CsaV3_1G035920/CsaV3_2G013320/CsaV3_2G030420/CsaV3_3G010470/CsaV3_3G021780/CsaV3_5G002770/CsaV3_5G034810/CsaV3_5G036470/CsaV3_6G040430/CsaV3_UNG052430	11
BP	GO:0009144	purine nucleoside triphosphate metabolic process	11/504	57/6278	0.00495401	0.044822	CsaV3_1G003090/CsaV3_1G035920/CsaV3_2G013320/CsaV3_2G030420/CsaV3_3G007170/CsaV3_3G010470/CsaV3_3G021780/CsaV3_5G034810/CsaV3_5G036470/CsaV3_6G040430/CsaV3_UNG052430	CsaV3_1G003090/CsaV3_1G035920/CsaV3_2G013320/CsaV3_2G030420/CsaV3_3G007170/CsaV3_3G010470/CsaV3_3G021780/CsaV3_5G034810/CsaV3_5G036470/CsaV3_6G040430/CsaV3_UNG052430	11
BP	GO:0009161	ribonucleoside monophosphate metabolic process	11/504	57/6278	0.00495401	0.044822	CsaV3_1G003090/CsaV3_1G035920/CsaV3_2G013320/CsaV3_2G030420/CsaV3_3G010470/CsaV3_3G021780/CsaV3_5G002770/CsaV3_5G034810/CsaV3_5G036470/CsaV3_6G040430/CsaV3_UNG052430	CsaV3_1G003090/CsaV3_1G035920/CsaV3_2G013320/CsaV3_2G030420/CsaV3_3G010470/CsaV3_3G021780/CsaV3_5G002770/CsaV3_5G034810/CsaV3_5G036470/CsaV3_6G040430/CsaV3_UNG052430	11
BP	GO:0009167	purine ribonucleoside monophosphate metabolic process	11/504	57/6278	0.00495401	0.044822	CsaV3_1G003090/CsaV3_1G035920/CsaV3_2G013320/CsaV3_2G030420/CsaV3_3G010470/CsaV3_3G021780/CsaV3_5G002770/CsaV3_5G034810/CsaV3_5G036470/CsaV3_6G040430/CsaV3_UNG052430	CsaV3_1G003090/CsaV3_1G035920/CsaV3_2G013320/CsaV3_2G030420/CsaV3_3G010470/CsaV3_3G021780/CsaV3_5G002770/CsaV3_5G034810/CsaV3_5G036470/CsaV3_6G040430/CsaV3_UNG052430	11
BP	GO:0009199	ribonucleoside triphosphate metabolic process	11/504	57/6278	0.00495401	0.044822	CsaV3_1G003090/CsaV3_1G035920/CsaV3_2G013320/CsaV3_2G030420/CsaV3_3G007170/CsaV3_3G010470/CsaV3_3G021780/CsaV3_5G034810/CsaV3_5G036470/CsaV3_6G040430/CsaV3_UNG052430	CsaV3_1G003090/CsaV3_1G035920/CsaV3_2G013320/CsaV3_2G030420/CsaV3_3G007170/CsaV3_3G010470/CsaV3_3G021780/CsaV3_5G034810/CsaV3_5G036470/CsaV3_6G040430/CsaV3_UNG052430	11
BP	GO:0009205	purine ribonucleoside triphosphate metabolic process	11/504	57/6278	0.00495401	0.044822	CsaV3_1G003090/CsaV3_1G035920/CsaV3_2G013320/CsaV3_2G030420/CsaV3_3G007170/CsaV3_3G010470/CsaV3_3G021780/CsaV3_5G034810/CsaV3_5G036470/CsaV3_6G040430/CsaV3_UNG052430	CsaV3_1G003090/CsaV3_1G035920/CsaV3_2G013320/CsaV3_2G030420/CsaV3_3G007170/CsaV3_3G010470/CsaV3_3G021780/CsaV3_5G034810/CsaV3_5G036470/CsaV3_6G040430/CsaV3_UNG052430	11
BP	GO:0072521	purine-containing compound metabolic process	13/504	74/6278	0.00546117	0.0477639	CsaV3_1G003090/CsaV3_1G010170/CsaV3_1G035920/CsaV3_2G013320/CsaV3_2G030420/CsaV3_3G007170/CsaV3_3G010470/CsaV3_3G021780/CsaV3_5G002770/CsaV3_5G034810/CsaV3_5G036470/CsaV3_6G040430/CsaV3_UNG052430	CsaV3_1G003090/CsaV3_1G010170/CsaV3_1G035920/CsaV3_2G013320/CsaV3_2G030420/CsaV3_3G007170/CsaV3_3G010470/CsaV3_3G021780/CsaV3_5G002770/CsaV3_5G034810/CsaV3_5G036470/CsaV3_6G040430/CsaV3_UNG052430	13
BP	GO:0044283	small molecule biosynthetic process	21/504	145/6278	0.00556637	0.0477639	CsaV3_1G003090/CsaV3_1G009790/CsaV3_1G035920/CsaV3_1G037190/CsaV3_2G013320/CsaV3_2G014210/CsaV3_2G030420/CsaV3_3G004760/CsaV3_3G007170/CsaV3_3G009100/CsaV3_3G010300/CsaV3_3G021780/CsaV3_3G043020/CsaV3_5G002770/CsaV3_5G008630/CsaV3_5G023610/CsaV3_5G023920/CsaV3_5G029840/CsaV3_6G040430/CsaV3_7G005980/CsaV3_7G021780	CsaV3_1G003090/CsaV3_1G009790/CsaV3_1G035920/CsaV3_1G037190/CsaV3_2G013320/CsaV3_2G014210/CsaV3_2G030420/CsaV3_3G004760/CsaV3_3G007170/CsaV3_3G009100/CsaV3_3G010300/CsaV3_3G021780/CsaV3_3G043020/CsaV3_5G002770/CsaV3_5G008630/CsaV3_5G023610/CsaV3_5G023920/CsaV3_5G029840/CsaV3_6G040430/CsaV3_7G005980/CsaV3_7G021780	21
BP	GO:0009123	nucleoside monophosphate metabolic process	11/504	58/6278	0.00568392	0.0477639	CsaV3_1G003090/CsaV3_1G035920/CsaV3_2G013320/CsaV3_2G030420/CsaV3_3G010470/CsaV3_3G021780/CsaV3_5G002770/CsaV3_5G034810/CsaV3_5G036470/CsaV3_6G040430/CsaV3_UNG052430	CsaV3_1G003090/CsaV3_1G035920/CsaV3_2G013320/CsaV3_2G030420/CsaV3_3G010470/CsaV3_3G021780/CsaV3_5G002770/CsaV3_5G034810/CsaV3_5G036470/CsaV3_6G040430/CsaV3_UNG052430	11
BP	GO:0019752	carboxylic acid metabolic process	29/504	222/6278	0.00578195	0.0477639	CsaV3_1G003090/CsaV3_1G009790/CsaV3_1G035920/CsaV3_1G037190/CsaV3_1G038230/CsaV3_2G008510/CsaV3_2G013320/CsaV3_2G014210/CsaV3_2G030420/CsaV3_3G002020/CsaV3_3G004760/CsaV3_3G009100/CsaV3_3G010300/CsaV3_3G014650/CsaV3_3G021780/CsaV3_3G043020/CsaV3_3G043270/CsaV3_4G003190/CsaV3_4G033150/CsaV3_5G008630/CsaV3_5G017320/CsaV3_5G023610/CsaV3_5G023920/CsaV3_5G026430/CsaV3_5G029840/CsaV3_6G040430/CsaV3_6G0…	CsaV3_1G003090/CsaV3_1G009790/CsaV3_1G035920/CsaV3_1G037190/CsaV3_1G038230/CsaV3_2G008510/CsaV3_2G013320/CsaV3_2G014210/CsaV3_2G030420/CsaV3_3G002020/CsaV3_3G004760/CsaV3_3G009100/CsaV3_3G010300/CsaV3_3G014650/CsaV3_3G021780/CsaV3_3G043020/CsaV3_3G043270/CsaV3_4G003190/CsaV3_4G033150/CsaV3_5G008630/CsaV3_5G017320/CsaV3_5G023610/CsaV3_5G023920/CsaV3_5G026430/CsaV3_5G029840/CsaV3_6G040430/CsaV3_6G0…	29
BP	GO:0006091	generation of precursor metabolites and energy	10/504	51/6278	0.00644913	0.0521419	CsaV3_1G003090/CsaV3_1G035920/CsaV3_2G013320/CsaV3_2G024700/CsaV3_2G030420/CsaV3_3G021780/CsaV3_4G033150/CsaV3_6G040430/CsaV3_6G044180/CsaV3_7G022520	CsaV3_1G003090/CsaV3_1G035920/CsaV3_2G013320/CsaV3_2G024700/CsaV3_2G030420/CsaV3_3G021780/CsaV3_4G033150/CsaV3_6G040430/CsaV3_6G044180/CsaV3_7G022520	10
BP	GO:0019693	ribose phosphate metabolic process	13/504	77/6278	0.00768931	0.0608737	CsaV3_1G003090/CsaV3_1G035920/CsaV3_2G013320/CsaV3_2G030420/CsaV3_3G007170/CsaV3_3G010470/CsaV3_3G021780/CsaV3_4G006330/CsaV3_5G002770/CsaV3_5G034810/CsaV3_5G036470/CsaV3_6G040430/CsaV3_UNG052430	CsaV3_1G003090/CsaV3_1G035920/CsaV3_2G013320/CsaV3_2G030420/CsaV3_3G007170/CsaV3_3G010470/CsaV3_3G021780/CsaV3_4G006330/CsaV3_5G002770/CsaV3_5G034810/CsaV3_5G036470/CsaV3_6G040430/CsaV3_UNG052430	13
BP	GO:0009117	nucleotide metabolic process	15/504	95/6278	0.00820442	0.0613917	CsaV3_1G003090/CsaV3_1G010170/CsaV3_1G035920/CsaV3_2G013320/CsaV3_2G028630/CsaV3_2G030420/CsaV3_3G007170/CsaV3_3G010470/CsaV3_3G021780/CsaV3_4G006330/CsaV3_5G002770/CsaV3_5G034810/CsaV3_5G036470/CsaV3_6G040430/CsaV3_UNG052430	CsaV3_1G003090/CsaV3_1G010170/CsaV3_1G035920/CsaV3_2G013320/CsaV3_2G028630/CsaV3_2G030420/CsaV3_3G007170/CsaV3_3G010470/CsaV3_3G021780/CsaV3_4G006330/CsaV3_5G002770/CsaV3_5G034810/CsaV3_5G036470/CsaV3_6G040430/CsaV3_UNG052430	15
BP	GO:0006165	nucleoside diphosphate phosphorylation	7/504	30/6278	0.00823942	0.0613917	CsaV3_1G003090/CsaV3_1G035920/CsaV3_2G013320/CsaV3_2G030420/CsaV3_3G007170/CsaV3_3G021780/CsaV3_6G040430	CsaV3_1G003090/CsaV3_1G035920/CsaV3_2G013320/CsaV3_2G030420/CsaV3_3G007170/CsaV3_3G021780/CsaV3_6G040430	7
BP	GO:0046939	nucleotide phosphorylation	7/504	30/6278	0.00823942	0.0613917	CsaV3_1G003090/CsaV3_1G035920/CsaV3_2G013320/CsaV3_2G030420/CsaV3_3G007170/CsaV3_3G021780/CsaV3_6G040430	CsaV3_1G003090/CsaV3_1G035920/CsaV3_2G013320/CsaV3_2G030420/CsaV3_3G007170/CsaV3_3G021780/CsaV3_6G040430	7
BP	GO:0043436	oxoacid metabolic process	29/504	230/6278	0.00941696	0.0688163	CsaV3_1G003090/CsaV3_1G009790/CsaV3_1G035920/CsaV3_1G037190/CsaV3_1G038230/CsaV3_2G008510/CsaV3_2G013320/CsaV3_2G014210/CsaV3_2G030420/CsaV3_3G002020/CsaV3_3G004760/CsaV3_3G009100/CsaV3_3G010300/CsaV3_3G014650/CsaV3_3G021780/CsaV3_3G043020/CsaV3_3G043270/CsaV3_4G003190/CsaV3_4G033150/CsaV3_5G008630/CsaV3_5G017320/CsaV3_5G023610/CsaV3_5G023920/CsaV3_5G026430/CsaV3_5G029840/CsaV3_6G040430/CsaV3_6G0…	CsaV3_1G003090/CsaV3_1G009790/CsaV3_1G035920/CsaV3_1G037190/CsaV3_1G038230/CsaV3_2G008510/CsaV3_2G013320/CsaV3_2G014210/CsaV3_2G030420/CsaV3_3G002020/CsaV3_3G004760/CsaV3_3G009100/CsaV3_3G010300/CsaV3_3G014650/CsaV3_3G021780/CsaV3_3G043020/CsaV3_3G043270/CsaV3_4G003190/CsaV3_4G033150/CsaV3_5G008630/CsaV3_5G017320/CsaV3_5G023610/CsaV3_5G023920/CsaV3_5G026430/CsaV3_5G029840/CsaV3_6G040430/CsaV3_6G0…	29
BP	GO:0046034	ATP metabolic process	10/504	54/6278	0.00972747	0.068917	CsaV3_1G003090/CsaV3_1G035920/CsaV3_2G013320/CsaV3_2G030420/CsaV3_3G010470/CsaV3_3G021780/CsaV3_5G034810/CsaV3_5G036470/CsaV3_6G040430/CsaV3_UNG052430	CsaV3_1G003090/CsaV3_1G035920/CsaV3_2G013320/CsaV3_2G030420/CsaV3_3G010470/CsaV3_3G021780/CsaV3_5G034810/CsaV3_5G036470/CsaV3_6G040430/CsaV3_UNG052430	10
BP	GO:0006082	organic acid metabolic process	29/504	231/6278	0.00998088	0.068917	CsaV3_1G003090/CsaV3_1G009790/CsaV3_1G035920/CsaV3_1G037190/CsaV3_1G038230/CsaV3_2G008510/CsaV3_2G013320/CsaV3_2G014210/CsaV3_2G030420/CsaV3_3G002020/CsaV3_3G004760/CsaV3_3G009100/CsaV3_3G010300/CsaV3_3G014650/CsaV3_3G021780/CsaV3_3G043020/CsaV3_3G043270/CsaV3_4G003190/CsaV3_4G033150/CsaV3_5G008630/CsaV3_5G017320/CsaV3_5G023610/CsaV3_5G023920/CsaV3_5G026430/CsaV3_5G029840/CsaV3_6G040430/CsaV3_6G0…	CsaV3_1G003090/CsaV3_1G009790/CsaV3_1G035920/CsaV3_1G037190/CsaV3_1G038230/CsaV3_2G008510/CsaV3_2G013320/CsaV3_2G014210/CsaV3_2G030420/CsaV3_3G002020/CsaV3_3G004760/CsaV3_3G009100/CsaV3_3G010300/CsaV3_3G014650/CsaV3_3G021780/CsaV3_3G043020/CsaV3_3G043270/CsaV3_4G003190/CsaV3_4G033150/CsaV3_5G008630/CsaV3_5G017320/CsaV3_5G023610/CsaV3_5G023920/CsaV3_5G026430/CsaV3_5G029840/CsaV3_6G040430/CsaV3_6G0…	29
BP	GO:0009150	purine ribonucleotide metabolic process	12/504	71/6278	0.0101562	0.068917	CsaV3_1G003090/CsaV3_1G035920/CsaV3_2G013320/CsaV3_2G030420/CsaV3_3G007170/CsaV3_3G010470/CsaV3_3G021780/CsaV3_5G002770/CsaV3_5G034810/CsaV3_5G036470/CsaV3_6G040430/CsaV3_UNG052430	CsaV3_1G003090/CsaV3_1G035920/CsaV3_2G013320/CsaV3_2G030420/CsaV3_3G007170/CsaV3_3G010470/CsaV3_3G021780/CsaV3_5G002770/CsaV3_5G034810/CsaV3_5G036470/CsaV3_6G040430/CsaV3_UNG052430	12
BP	GO:0009259	ribonucleotide metabolic process	12/504	71/6278	0.0101562	0.068917	CsaV3_1G003090/CsaV3_1G035920/CsaV3_2G013320/CsaV3_2G030420/CsaV3_3G007170/CsaV3_3G010470/CsaV3_3G021780/CsaV3_5G002770/CsaV3_5G034810/CsaV3_5G036470/CsaV3_6G040430/CsaV3_UNG052430	CsaV3_1G003090/CsaV3_1G035920/CsaV3_2G013320/CsaV3_2G030420/CsaV3_3G007170/CsaV3_3G010470/CsaV3_3G021780/CsaV3_5G002770/CsaV3_5G034810/CsaV3_5G036470/CsaV3_6G040430/CsaV3_UNG052430	12
BP	GO:0006520	cellular amino acid metabolic process	16/504	110/6278	0.013951	0.0930066	CsaV3_1G037190/CsaV3_1G038230/CsaV3_2G008510/CsaV3_2G014210/CsaV3_3G002020/CsaV3_3G004760/CsaV3_3G014650/CsaV3_3G043020/CsaV3_3G043270/CsaV3_4G003190/CsaV3_5G023920/CsaV3_5G026430/CsaV3_5G029840/CsaV3_6G048760/CsaV3_7G005980/CsaV3_7G021780	CsaV3_1G037190/CsaV3_1G038230/CsaV3_2G008510/CsaV3_2G014210/CsaV3_3G002020/CsaV3_3G004760/CsaV3_3G014650/CsaV3_3G043020/CsaV3_3G043270/CsaV3_4G003190/CsaV3_5G023920/CsaV3_5G026430/CsaV3_5G029840/CsaV3_6G048760/CsaV3_7G005980/CsaV3_7G021780	16
BP	GO:0006096	glycolytic process	6/504	28/6278	0.0213579	0.126813	CsaV3_1G003090/CsaV3_1G035920/CsaV3_2G013320/CsaV3_2G030420/CsaV3_3G021780/CsaV3_6G040430	CsaV3_1G003090/CsaV3_1G035920/CsaV3_2G013320/CsaV3_2G030420/CsaV3_3G021780/CsaV3_6G040430	6
BP	GO:0006757	ATP generation from ADP	6/504	28/6278	0.0213579	0.126813	CsaV3_1G003090/CsaV3_1G035920/CsaV3_2G013320/CsaV3_2G030420/CsaV3_3G021780/CsaV3_6G040430	CsaV3_1G003090/CsaV3_1G035920/CsaV3_2G013320/CsaV3_2G030420/CsaV3_3G021780/CsaV3_6G040430	6
BP	GO:0009135	purine nucleoside diphosphate metabolic process	6/504	28/6278	0.0213579	0.126813	CsaV3_1G003090/CsaV3_1G035920/CsaV3_2G013320/CsaV3_2G030420/CsaV3_3G021780/CsaV3_6G040430	CsaV3_1G003090/CsaV3_1G035920/CsaV3_2G013320/CsaV3_2G030420/CsaV3_3G021780/CsaV3_6G040430	6
BP	GO:0009179	purine ribonucleoside diphosphate metabolic process	6/504	28/6278	0.0213579	0.126813	CsaV3_1G003090/CsaV3_1G035920/CsaV3_2G013320/CsaV3_2G030420/CsaV3_3G021780/CsaV3_6G040430	CsaV3_1G003090/CsaV3_1G035920/CsaV3_2G013320/CsaV3_2G030420/CsaV3_3G021780/CsaV3_6G040430	6
BP	GO:0009185	ribonucleoside diphosphate metabolic process	6/504	28/6278	0.0213579	0.126813	CsaV3_1G003090/CsaV3_1G035920/CsaV3_2G013320/CsaV3_2G030420/CsaV3_3G021780/CsaV3_6G040430	CsaV3_1G003090/CsaV3_1G035920/CsaV3_2G013320/CsaV3_2G030420/CsaV3_3G021780/CsaV3_6G040430	6
BP	GO:0042866	pyruvate biosynthetic process	6/504	28/6278	0.0213579	0.126813	CsaV3_1G003090/CsaV3_1G035920/CsaV3_2G013320/CsaV3_2G030420/CsaV3_3G021780/CsaV3_6G040430	CsaV3_1G003090/CsaV3_1G035920/CsaV3_2G013320/CsaV3_2G030420/CsaV3_3G021780/CsaV3_6G040430	6
BP	GO:0046031	ADP metabolic process	6/504	28/6278	0.0213579	0.126813	CsaV3_1G003090/CsaV3_1G035920/CsaV3_2G013320/CsaV3_2G030420/CsaV3_3G021780/CsaV3_6G040430	CsaV3_1G003090/CsaV3_1G035920/CsaV3_2G013320/CsaV3_2G030420/CsaV3_3G021780/CsaV3_6G040430	6
BP	GO:0019637	organophosphate metabolic process	20/504	155/6278	0.0225347	0.131741	CsaV3_1G003090/CsaV3_1G010170/CsaV3_1G035920/CsaV3_2G013320/CsaV3_2G028630/CsaV3_2G030420/CsaV3_3G007170/CsaV3_3G010470/CsaV3_3G021780/CsaV3_3G027630/CsaV3_4G006330/CsaV3_4G029670/CsaV3_5G002770/CsaV3_5G024510/CsaV3_5G034810/CsaV3_5G036470/CsaV3_6G006390/CsaV3_6G040430/CsaV3_6G041580/CsaV3_UNG052430	CsaV3_1G003090/CsaV3_1G010170/CsaV3_1G035920/CsaV3_2G013320/CsaV3_2G028630/CsaV3_2G030420/CsaV3_3G007170/CsaV3_3G010470/CsaV3_3G021780/CsaV3_3G027630/CsaV3_4G006330/CsaV3_4G029670/CsaV3_5G002770/CsaV3_5G024510/CsaV3_5G034810/CsaV3_5G036470/CsaV3_6G006390/CsaV3_6G040430/CsaV3_6G041580/CsaV3_UNG052430	20
BP	GO:0008652	cellular amino acid biosynthetic process	8/504	45/6278	0.0249742	0.140614	CsaV3_1G037190/CsaV3_2G014210/CsaV3_3G004760/CsaV3_3G043020/CsaV3_5G023920/CsaV3_5G029840/CsaV3_7G005980/CsaV3_7G021780	CsaV3_1G037190/CsaV3_2G014210/CsaV3_3G004760/CsaV3_3G043020/CsaV3_5G023920/CsaV3_5G029840/CsaV3_7G005980/CsaV3_7G021780	8
BP	GO:0009166	nucleotide catabolic process	6/504	29/6278	0.0251624	0.140614	CsaV3_1G003090/CsaV3_1G035920/CsaV3_2G013320/CsaV3_2G030420/CsaV3_3G021780/CsaV3_6G040430	CsaV3_1G003090/CsaV3_1G035920/CsaV3_2G013320/CsaV3_2G030420/CsaV3_3G021780/CsaV3_6G040430	6
BP	GO:1901292	nucleoside phosphate catabolic process	6/504	29/6278	0.0251624	0.140614	CsaV3_1G003090/CsaV3_1G035920/CsaV3_2G013320/CsaV3_2G030420/CsaV3_3G021780/CsaV3_6G040430	CsaV3_1G003090/CsaV3_1G035920/CsaV3_2G013320/CsaV3_2G030420/CsaV3_3G021780/CsaV3_6G040430	6
BP	GO:0043038	amino acid activation	7/504	38/6278	0.0293244	0.157316	CsaV3_1G038230/CsaV3_2G008510/CsaV3_3G002020/CsaV3_3G014650/CsaV3_4G003190/CsaV3_5G026430/CsaV3_6G048760	CsaV3_1G038230/CsaV3_2G008510/CsaV3_3G002020/CsaV3_3G014650/CsaV3_4G003190/CsaV3_5G026430/CsaV3_6G048760	7
BP	GO:0043039	tRNA aminoacylation	7/504	38/6278	0.0293244	0.157316	CsaV3_1G038230/CsaV3_2G008510/CsaV3_3G002020/CsaV3_3G014650/CsaV3_4G003190/CsaV3_5G026430/CsaV3_6G048760	CsaV3_1G038230/CsaV3_2G008510/CsaV3_3G002020/CsaV3_3G014650/CsaV3_4G003190/CsaV3_5G026430/CsaV3_6G048760	7
BP	GO:0006090	pyruvate metabolic process	6/504	30/6278	0.0293932	0.157316	CsaV3_1G003090/CsaV3_1G035920/CsaV3_2G013320/CsaV3_2G030420/CsaV3_3G021780/CsaV3_6G040430	CsaV3_1G003090/CsaV3_1G035920/CsaV3_2G013320/CsaV3_2G030420/CsaV3_3G021780/CsaV3_6G040430	6
BP	GO:1901137	carbohydrate derivative biosynthetic process	15/504	111/6278	0.0310593	0.163924	CsaV3_1G003090/CsaV3_1G008060/CsaV3_1G010720/CsaV3_1G035920/CsaV3_2G013320/CsaV3_2G030420/CsaV3_3G007170/CsaV3_3G010470/CsaV3_3G021780/CsaV3_5G002770/CsaV3_5G014110/CsaV3_5G034810/CsaV3_5G036470/CsaV3_6G040430/CsaV3_UNG052430	CsaV3_1G003090/CsaV3_1G008060/CsaV3_1G010720/CsaV3_1G035920/CsaV3_2G013320/CsaV3_2G030420/CsaV3_3G007170/CsaV3_3G010470/CsaV3_3G021780/CsaV3_5G002770/CsaV3_5G014110/CsaV3_5G034810/CsaV3_5G036470/CsaV3_6G040430/CsaV3_UNG052430	15
BP	GO:0016052	carbohydrate catabolic process	7/504	40/6278	0.0377526	0.19128	CsaV3_1G003090/CsaV3_1G035920/CsaV3_2G013320/CsaV3_2G030420/CsaV3_3G021780/CsaV3_3G023420/CsaV3_6G040430	CsaV3_1G003090/CsaV3_1G035920/CsaV3_2G013320/CsaV3_2G030420/CsaV3_3G021780/CsaV3_3G023420/CsaV3_6G040430	7
BP	GO:0019362	pyridine nucleotide metabolic process	7/504	40/6278	0.0377526	0.19128	CsaV3_1G003090/CsaV3_1G035920/CsaV3_2G013320/CsaV3_2G030420/CsaV3_3G021780/CsaV3_4G006330/CsaV3_6G040430	CsaV3_1G003090/CsaV3_1G035920/CsaV3_2G013320/CsaV3_2G030420/CsaV3_3G021780/CsaV3_4G006330/CsaV3_6G040430	7
BP	GO:0046496	nicotinamide nucleotide metabolic process	7/504	40/6278	0.0377526	0.19128	CsaV3_1G003090/CsaV3_1G035920/CsaV3_2G013320/CsaV3_2G030420/CsaV3_3G021780/CsaV3_4G006330/CsaV3_6G040430	CsaV3_1G003090/CsaV3_1G035920/CsaV3_2G013320/CsaV3_2G030420/CsaV3_3G021780/CsaV3_4G006330/CsaV3_6G040430	7
BP	GO:0046434	organophosphate catabolic process	6/504	32/6278	0.0391921	0.19596	CsaV3_1G003090/CsaV3_1G035920/CsaV3_2G013320/CsaV3_2G030420/CsaV3_3G021780/CsaV3_6G040430	CsaV3_1G003090/CsaV3_1G035920/CsaV3_2G013320/CsaV3_2G030420/CsaV3_3G021780/CsaV3_6G040430	6
BP	GO:0006733	oxidoreduction coenzyme metabolic process	7/504	41/6278	0.042507	0.209775	CsaV3_1G003090/CsaV3_1G035920/CsaV3_2G013320/CsaV3_2G030420/CsaV3_3G021780/CsaV3_4G006330/CsaV3_6G040430	CsaV3_1G003090/CsaV3_1G035920/CsaV3_2G013320/CsaV3_2G030420/CsaV3_3G021780/CsaV3_4G006330/CsaV3_6G040430	7
BP	GO:0019359	nicotinamide nucleotide biosynthetic process	6/504	34/6278	0.0508482	0.244586	CsaV3_1G003090/CsaV3_1G035920/CsaV3_2G013320/CsaV3_2G030420/CsaV3_3G021780/CsaV3_6G040430	CsaV3_1G003090/CsaV3_1G035920/CsaV3_2G013320/CsaV3_2G030420/CsaV3_3G021780/CsaV3_6G040430	6
BP	GO:0019363	pyridine nucleotide biosynthetic process	6/504	34/6278	0.0508482	0.244586	CsaV3_1G003090/CsaV3_1G035920/CsaV3_2G013320/CsaV3_2G030420/CsaV3_3G021780/CsaV3_6G040430	CsaV3_1G003090/CsaV3_1G035920/CsaV3_2G013320/CsaV3_2G030420/CsaV3_3G021780/CsaV3_6G040430	6
BP	GO:0006298	mismatch repair	3/504	1599338	0.0522009	0.247954	CsaV3_2G002320/CsaV3_3G000200/CsaV3_7G029150	CsaV3_2G002320/CsaV3_3G000200/CsaV3_7G029150	3
BP	GO:0072524	pyridine-containing compound metabolic process	7/504	43/6278	0.053136	0.24928	CsaV3_1G003090/CsaV3_1G035920/CsaV3_2G013320/CsaV3_2G030420/CsaV3_3G021780/CsaV3_4G006330/CsaV3_6G040430	CsaV3_1G003090/CsaV3_1G035920/CsaV3_2G013320/CsaV3_2G030420/CsaV3_3G021780/CsaV3_4G006330/CsaV3_6G040430	7
BP	GO:0090407	organophosphate biosynthetic process	13/504	101/6278	0.0594467	0.275485	CsaV3_1G003090/CsaV3_1G010170/CsaV3_1G035920/CsaV3_2G013320/CsaV3_2G030420/CsaV3_3G007170/CsaV3_3G010470/CsaV3_3G021780/CsaV3_5G002770/CsaV3_5G034810/CsaV3_5G036470/CsaV3_6G040430/CsaV3_UNG052430	CsaV3_1G003090/CsaV3_1G010170/CsaV3_1G035920/CsaV3_2G013320/CsaV3_2G030420/CsaV3_3G007170/CsaV3_3G010470/CsaV3_3G021780/CsaV3_5G002770/CsaV3_5G034810/CsaV3_5G036470/CsaV3_6G040430/CsaV3_UNG052430	13
BP	GO:1901135	carbohydrate derivative metabolic process	19/504	163/6278	0.0624293	0.285821	CsaV3_1G003090/CsaV3_1G008060/CsaV3_1G010720/CsaV3_1G035920/CsaV3_2G013320/CsaV3_2G028630/CsaV3_2G030420/CsaV3_3G007170/CsaV3_3G010470/CsaV3_3G021780/CsaV3_4G006330/CsaV3_5G002770/CsaV3_5G014110/CsaV3_5G034810/CsaV3_5G036470/CsaV3_6G006390/CsaV3_6G040430/CsaV3_7G000760/CsaV3_UNG052430	CsaV3_1G003090/CsaV3_1G008060/CsaV3_1G010720/CsaV3_1G035920/CsaV3_2G013320/CsaV3_2G028630/CsaV3_2G030420/CsaV3_3G007170/CsaV3_3G010470/CsaV3_3G021780/CsaV3_4G006330/CsaV3_5G002770/CsaV3_5G014110/CsaV3_5G034810/CsaV3_5G036470/CsaV3_6G006390/CsaV3_6G040430/CsaV3_7G000760/CsaV3_UNG052430	19
BP	GO:0006418	tRNA aminoacylation for protein translation	6/504	36/6278	0.064416	0.291406	CsaV3_1G038230/CsaV3_2G008510/CsaV3_3G014650/CsaV3_4G003190/CsaV3_5G026430/CsaV3_6G048760	CsaV3_1G038230/CsaV3_2G008510/CsaV3_3G014650/CsaV3_4G003190/CsaV3_5G026430/CsaV3_6G048760	6
BP	GO:0048583	regulation of response to stimulus	3/504	1599368	0.0655779	0.293172	CsaV3_3G009610/CsaV3_3G010020/CsaV3_5G008330	CsaV3_3G009610/CsaV3_3G010020/CsaV3_5G008330	3
BP	GO:0016579	protein deubiquitination	4/504	20/6278	0.0710406	0.310292	CsaV3_1G002070/CsaV3_2G031540/CsaV3_3G001680/CsaV3_5G006240	CsaV3_1G002070/CsaV3_2G031540/CsaV3_3G001680/CsaV3_5G006240	4
BP	GO:0070646	protein modification by small protein removal	4/504	20/6278	0.0710406	0.310292	CsaV3_1G002070/CsaV3_2G031540/CsaV3_3G001680/CsaV3_5G006240	CsaV3_1G002070/CsaV3_2G031540/CsaV3_3G001680/CsaV3_5G006240	4
BP	GO:0072525	pyridine-containing compound biosynthetic process	6/504	37/6278	0.0719229	0.310576	CsaV3_1G003090/CsaV3_1G035920/CsaV3_2G013320/CsaV3_2G030420/CsaV3_3G021780/CsaV3_6G040430	CsaV3_1G003090/CsaV3_1G035920/CsaV3_2G013320/CsaV3_2G030420/CsaV3_3G021780/CsaV3_6G040430	6
BP	GO:0009108	coenzyme biosynthetic process	8/504	56/6278	0.0766865	0.327425	CsaV3_1G003090/CsaV3_1G035920/CsaV3_2G013320/CsaV3_2G030420/CsaV3_3G009100/CsaV3_3G021780/CsaV3_5G008630/CsaV3_6G040430	CsaV3_1G003090/CsaV3_1G035920/CsaV3_2G013320/CsaV3_2G030420/CsaV3_3G009100/CsaV3_3G021780/CsaV3_5G008630/CsaV3_6G040430	8
BP	GO:0051188	cofactor biosynthetic process	9/504	66/6278	0.0795193	0.335748	CsaV3_1G003090/CsaV3_1G035920/CsaV3_2G013320/CsaV3_2G030420/CsaV3_3G009100/CsaV3_3G021780/CsaV3_4G008050/CsaV3_5G008630/CsaV3_6G040430	CsaV3_1G003090/CsaV3_1G035920/CsaV3_2G013320/CsaV3_2G030420/CsaV3_3G009100/CsaV3_3G021780/CsaV3_4G008050/CsaV3_5G008630/CsaV3_6G040430	9
BP	GO:0006950	response to stress	30/504	289/6278	0.0847759	0.344329	CsaV3_1G008250/CsaV3_1G012650/CsaV3_1G012980/CsaV3_1G032850/CsaV3_1G038550/CsaV3_2G002320/CsaV3_2G008240/CsaV3_2G022190/CsaV3_2G031500/CsaV3_3G000200/CsaV3_3G011600/CsaV3_3G033440/CsaV3_3G042120/CsaV3_3G042140/CsaV3_3G042180/CsaV3_3G044230/CsaV3_3G047080/CsaV3_4G012030/CsaV3_4G012080/CsaV3_4G012090/CsaV3_5G014970/CsaV3_5G015030/CsaV3_5G015140/CsaV3_5G035370/CsaV3_6G002170/CsaV3_6G007600/CsaV3_6G0…	CsaV3_1G008250/CsaV3_1G012650/CsaV3_1G012980/CsaV3_1G032850/CsaV3_1G038550/CsaV3_2G002320/CsaV3_2G008240/CsaV3_2G022190/CsaV3_2G031500/CsaV3_3G000200/CsaV3_3G011600/CsaV3_3G033440/CsaV3_3G042120/CsaV3_3G042140/CsaV3_3G042180/CsaV3_3G044230/CsaV3_3G047080/CsaV3_4G012030/CsaV3_4G012080/CsaV3_4G012090/CsaV3_5G014970/CsaV3_5G015030/CsaV3_5G015140/CsaV3_5G035370/CsaV3_6G002170/CsaV3_6G007600/CsaV3_6G0…	30
BP	GO:0006732	coenzyme metabolic process	9/504	67/6278	0.0856886	0.344329	CsaV3_1G003090/CsaV3_1G035920/CsaV3_2G013320/CsaV3_2G030420/CsaV3_3G009100/CsaV3_3G021780/CsaV3_4G006330/CsaV3_5G008630/CsaV3_6G040430	CsaV3_1G003090/CsaV3_1G035920/CsaV3_2G013320/CsaV3_2G030420/CsaV3_3G009100/CsaV3_3G021780/CsaV3_4G006330/CsaV3_5G008630/CsaV3_6G040430	9
BP	GO:0006928	movement of cell or subcellular component	7/504	48/6278	0.0864366	0.344329	CsaV3_1G024160/CsaV3_1G033760/CsaV3_3G015910/CsaV3_4G005820/CsaV3_6G034290/CsaV3_6G045040/CsaV3_UNG147160	CsaV3_1G024160/CsaV3_1G033760/CsaV3_3G015910/CsaV3_4G005820/CsaV3_6G034290/CsaV3_6G045040/CsaV3_UNG147160	7
BP	GO:0007018	microtubule-based movement	7/504	48/6278	0.0864366	0.344329	CsaV3_1G024160/CsaV3_1G033760/CsaV3_3G015910/CsaV3_4G005820/CsaV3_6G034290/CsaV3_6G045040/CsaV3_UNG147160	CsaV3_1G024160/CsaV3_1G033760/CsaV3_3G015910/CsaV3_4G005820/CsaV3_6G034290/CsaV3_6G045040/CsaV3_UNG147160	7
BP	GO:0006887	exocytosis	5/504	30/6278	0.0878945	0.344329	CsaV3_1G009630/CsaV3_3G030800/CsaV3_6G006180/CsaV3_6G030940/CsaV3_7G033810	CsaV3_1G009630/CsaV3_3G030800/CsaV3_6G006180/CsaV3_6G030940/CsaV3_7G033810	5
BP	GO:0032940	secretion by cell	5/504	30/6278	0.0878945	0.344329	CsaV3_1G009630/CsaV3_3G030800/CsaV3_6G006180/CsaV3_6G030940/CsaV3_7G033810	CsaV3_1G009630/CsaV3_3G030800/CsaV3_6G006180/CsaV3_6G030940/CsaV3_7G033810	5
BP	GO:0046903	secretion	5/504	30/6278	0.0878945	0.344329	CsaV3_1G009630/CsaV3_3G030800/CsaV3_6G006180/CsaV3_6G030940/CsaV3_7G033810	CsaV3_1G009630/CsaV3_3G030800/CsaV3_6G006180/CsaV3_6G030940/CsaV3_7G033810	5
BP	GO:0044087	regulation of cellular component biogenesis	3/504	14/6278	0.0964053	0.373817	CsaV3_4G031280/CsaV3_5G025150/CsaV3_5G033110	CsaV3_4G031280/CsaV3_5G025150/CsaV3_5G033110	3
BP	GO:0072330	monocarboxylic acid biosynthetic process	9/504	69/6278	0.0988606	0.379465	CsaV3_1G003090/CsaV3_1G009790/CsaV3_1G035920/CsaV3_2G013320/CsaV3_2G030420/CsaV3_3G010300/CsaV3_3G021780/CsaV3_5G023610/CsaV3_6G040430	CsaV3_1G003090/CsaV3_1G009790/CsaV3_1G035920/CsaV3_2G013320/CsaV3_2G030420/CsaV3_3G010300/CsaV3_3G021780/CsaV3_5G023610/CsaV3_6G040430	9
BP	GO:0017144	drug metabolic process	12/504	100/6278	0.103085	0.391722	CsaV3_1G003090/CsaV3_1G035920/CsaV3_2G013320/CsaV3_2G030420/CsaV3_3G010470/CsaV3_3G021780/CsaV3_4G033150/CsaV3_5G034810/CsaV3_5G036470/CsaV3_6G005510/CsaV3_6G040430/CsaV3_UNG052430	CsaV3_1G003090/CsaV3_1G035920/CsaV3_2G013320/CsaV3_2G030420/CsaV3_3G010470/CsaV3_3G021780/CsaV3_4G033150/CsaV3_5G034810/CsaV3_5G036470/CsaV3_6G005510/CsaV3_6G040430/CsaV3_UNG052430	12
BP	GO:0034655	nucleobase-containing compound catabolic process	6/504	43/6278	0.126828	0.477175	CsaV3_1G003090/CsaV3_1G035920/CsaV3_2G013320/CsaV3_2G030420/CsaV3_3G021780/CsaV3_6G040430	CsaV3_1G003090/CsaV3_1G035920/CsaV3_2G013320/CsaV3_2G030420/CsaV3_3G021780/CsaV3_6G040430	6
BP	GO:0006996	organelle organization	10/504	84/6278	0.134034	0.499344	CsaV3_2G008570/CsaV3_3G016100/CsaV3_4G031280/CsaV3_4G034020/CsaV3_5G027630/CsaV3_5G028660/CsaV3_6G004490/CsaV3_6G007420/CsaV3_6G035790/CsaV3_7G023520	CsaV3_2G008570/CsaV3_3G016100/CsaV3_4G031280/CsaV3_4G034020/CsaV3_5G027630/CsaV3_5G028660/CsaV3_6G004490/CsaV3_6G007420/CsaV3_6G035790/CsaV3_7G023520	10
BP	GO:0007017	microtubule-based process	8/504	64/6278	0.138337	0.505462	CsaV3_1G024160/CsaV3_1G033760/CsaV3_3G015910/CsaV3_4G005820/CsaV3_4G031280/CsaV3_6G034290/CsaV3_6G045040/CsaV3_UNG147160	CsaV3_1G024160/CsaV3_1G033760/CsaV3_3G015910/CsaV3_4G005820/CsaV3_4G031280/CsaV3_6G034290/CsaV3_6G045040/CsaV3_UNG147160	8
BP	GO:0070647	protein modification by small protein conjugation or removal	8/504	64/6278	0.138337	0.505462	CsaV3_1G002070/CsaV3_1G034080/CsaV3_1G043860/CsaV3_2G031540/CsaV3_3G001680/CsaV3_3G013600/CsaV3_5G006240/CsaV3_5G031630	CsaV3_1G002070/CsaV3_1G034080/CsaV3_1G043860/CsaV3_2G031540/CsaV3_3G001680/CsaV3_3G013600/CsaV3_5G006240/CsaV3_5G031630	8
BP	GO:0051716	cellular response to stimulus	25/504	249/6278	0.14218	0.514556	CsaV3_1G004280/CsaV3_1G008250/CsaV3_1G032850/CsaV3_1G043470/CsaV3_2G002140/CsaV3_2G002320/CsaV3_2G022190/CsaV3_2G031500/CsaV3_2G034580/CsaV3_3G000200/CsaV3_3G007720/CsaV3_3G009610/CsaV3_3G010020/CsaV3_3G033440/CsaV3_3G041210/CsaV3_3G042180/CsaV3_4G008100/CsaV3_4G012030/CsaV3_4G012080/CsaV3_4G012090/CsaV3_5G008330/CsaV3_5G035370/CsaV3_6G007600/CsaV3_6G014300/CsaV3_7G029150	CsaV3_1G004280/CsaV3_1G008250/CsaV3_1G032850/CsaV3_1G043470/CsaV3_2G002140/CsaV3_2G002320/CsaV3_2G022190/CsaV3_2G031500/CsaV3_2G034580/CsaV3_3G000200/CsaV3_3G007720/CsaV3_3G009610/CsaV3_3G010020/CsaV3_3G033440/CsaV3_3G041210/CsaV3_3G042180/CsaV3_4G008100/CsaV3_4G012030/CsaV3_4G012080/CsaV3_4G012090/CsaV3_5G008330/CsaV3_5G035370/CsaV3_6G007600/CsaV3_6G014300/CsaV3_7G029150	25
BP	GO:0042221	response to chemical	12/504	107/6278	0.148272	0.52704	CsaV3_1G001040/CsaV3_1G011510/CsaV3_2G008050/CsaV3_2G015380/CsaV3_3G019490/CsaV3_6G007500/CsaV3_6G031720/CsaV3_7G000680/CsaV3_7G000690/CsaV3_7G000720/CsaV3_7G003640/CsaV3_7G033620	CsaV3_1G001040/CsaV3_1G011510/CsaV3_2G008050/CsaV3_2G015380/CsaV3_3G019490/CsaV3_6G007500/CsaV3_6G031720/CsaV3_7G000680/CsaV3_7G000690/CsaV3_7G000720/CsaV3_7G003640/CsaV3_7G033620	12
BP	GO:0051276	chromosome organization	6/504	45/6278	0.148648	0.52704	CsaV3_3G016100/CsaV3_4G034020/CsaV3_5G027630/CsaV3_5G028660/CsaV3_6G007420/CsaV3_6G035790	CsaV3_3G016100/CsaV3_4G034020/CsaV3_5G027630/CsaV3_5G028660/CsaV3_6G007420/CsaV3_6G035790	6
BP	GO:0015985	energy coupled proton transport, down electrochemical gradient	3/504	17/6278	0.151177	0.52704	CsaV3_3G010470/CsaV3_5G036470/CsaV3_UNG052430	CsaV3_3G010470/CsaV3_5G036470/CsaV3_UNG052430	3
BP	GO:0015986	ATP synthesis coupled proton transport	3/504	17/6278	0.151177	0.52704	CsaV3_3G010470/CsaV3_5G036470/CsaV3_UNG052430	CsaV3_3G010470/CsaV3_5G036470/CsaV3_UNG052430	3
BP	GO:1901607	alpha-amino acid biosynthetic process	5/504	36/6278	0.15832	0.546922	CsaV3_1G037190/CsaV3_3G043020/CsaV3_5G023920/CsaV3_5G029840/CsaV3_7G021780	CsaV3_1G037190/CsaV3_3G043020/CsaV3_5G023920/CsaV3_5G029840/CsaV3_7G021780	5
BP	GO:0009308	amine metabolic process	4/504	28/6278	0.183195	0.618604	CsaV3_3G043270/CsaV3_4G027750/CsaV3_6G005510/CsaV3_6G038150	CsaV3_3G043270/CsaV3_4G027750/CsaV3_6G005510/CsaV3_6G038150	4
BP	GO:0006074	(1->3)-beta-D-glucan metabolic process	2/504	1599307	0.188837	0.618604	CsaV3_2G018300/CsaV3_7G031450	CsaV3_2G018300/CsaV3_7G031450	2
BP	GO:0006075	(1->3)-beta-D-glucan biosynthetic process	2/504	1599307	0.188837	0.618604	CsaV3_2G018300/CsaV3_7G031450	CsaV3_2G018300/CsaV3_7G031450	2
BP	GO:0006904	vesicle docking involved in exocytosis	2/504	1599307	0.188837	0.618604	CsaV3_6G006180/CsaV3_6G030940	CsaV3_6G006180/CsaV3_6G030940	2
BP	GO:0009066	aspartate family amino acid metabolic process	2/504	1599307	0.188837	0.618604	CsaV3_3G043020/CsaV3_7G021780	CsaV3_3G043020/CsaV3_7G021780	2
BP	GO:0140029	exocytic process	2/504	1599307	0.188837	0.618604	CsaV3_6G006180/CsaV3_6G030940	CsaV3_6G006180/CsaV3_6G030940	2
BP	GO:0051128	regulation of cellular component organization	3/504	19/6278	0.191995	0.623575	CsaV3_4G031280/CsaV3_5G025150/CsaV3_5G033110	CsaV3_4G031280/CsaV3_5G025150/CsaV3_5G033110	3
BP	GO:1901605	alpha-amino acid metabolic process	6/504	49/6278	0.196814	0.633807	CsaV3_1G037190/CsaV3_3G043020/CsaV3_3G043270/CsaV3_5G023920/CsaV3_5G029840/CsaV3_7G021780	CsaV3_1G037190/CsaV3_3G043020/CsaV3_3G043270/CsaV3_5G023920/CsaV3_5G029840/CsaV3_7G021780	6
BP	GO:0046488	phosphatidylinositol metabolic process	4/504	29/6278	0.200003	0.638111	CsaV3_4G029670/CsaV3_5G024510/CsaV3_6G006390/CsaV3_6G041580	CsaV3_4G029670/CsaV3_5G024510/CsaV3_6G006390/CsaV3_6G041580	4
BP	GO:0051186	cofactor metabolic process	10/504	92/6278	0.201509	0.638111	CsaV3_1G003090/CsaV3_1G035920/CsaV3_2G013320/CsaV3_2G030420/CsaV3_3G009100/CsaV3_3G021780/CsaV3_4G006330/CsaV3_4G008050/CsaV3_5G008630/CsaV3_6G040430	CsaV3_1G003090/CsaV3_1G035920/CsaV3_2G013320/CsaV3_2G030420/CsaV3_3G009100/CsaV3_3G021780/CsaV3_4G006330/CsaV3_4G008050/CsaV3_5G008630/CsaV3_6G040430	10
BP	GO:0046700	heterocycle catabolic process	6/504	50/6278	0.209681	0.650752	CsaV3_1G003090/CsaV3_1G035920/CsaV3_2G013320/CsaV3_2G030420/CsaV3_3G021780/CsaV3_6G040430	CsaV3_1G003090/CsaV3_1G035920/CsaV3_2G013320/CsaV3_2G030420/CsaV3_3G021780/CsaV3_6G040430	6
BP	GO:0009733	response to auxin	5/504	40/6278	0.214744	0.650752	CsaV3_2G015380/CsaV3_7G000680/CsaV3_7G000690/CsaV3_7G000720/CsaV3_7G033620	CsaV3_2G015380/CsaV3_7G000680/CsaV3_7G000690/CsaV3_7G000720/CsaV3_7G033620	5
BP	GO:0007264	small GTPase mediated signal transduction	7/504	61/6278	0.215265	0.650752	CsaV3_1G004280/CsaV3_2G002140/CsaV3_2G034580/CsaV3_3G009610/CsaV3_3G010020/CsaV3_4G008100/CsaV3_5G008330	CsaV3_1G004280/CsaV3_2G002140/CsaV3_2G034580/CsaV3_3G009610/CsaV3_3G010020/CsaV3_4G008100/CsaV3_5G008330	7
BP	GO:0022406	membrane docking	2/504	1599338	0.219201	0.650752	CsaV3_6G006180/CsaV3_6G030940	CsaV3_6G006180/CsaV3_6G030940	2
BP	GO:0042398	cellular modified amino acid biosynthetic process	2/504	1599338	0.219201	0.650752	CsaV3_3G009100/CsaV3_5G008630	CsaV3_3G009100/CsaV3_5G008630	2
BP	GO:0048278	vesicle docking	2/504	1599338	0.219201	0.650752	CsaV3_6G006180/CsaV3_6G030940	CsaV3_6G006180/CsaV3_6G030940	2
BP	GO:0051640	organelle localization	2/504	1599338	0.219201	0.650752	CsaV3_6G006180/CsaV3_6G030940	CsaV3_6G006180/CsaV3_6G030940	2
BP	GO:0140056	organelle localization by membrane tethering	2/504	1599338	0.219201	0.650752	CsaV3_6G006180/CsaV3_6G030940	CsaV3_6G006180/CsaV3_6G030940	2
BP	GO:0044270	cellular nitrogen compound catabolic process	6/504	51/6278	0.222834	0.651362	CsaV3_1G003090/CsaV3_1G035920/CsaV3_2G013320/CsaV3_2G030420/CsaV3_3G021780/CsaV3_6G040430	CsaV3_1G003090/CsaV3_1G035920/CsaV3_2G013320/CsaV3_2G030420/CsaV3_3G021780/CsaV3_6G040430	6
BP	GO:1901361	organic cyclic compound catabolic process	6/504	51/6278	0.222834	0.651362	CsaV3_1G003090/CsaV3_1G035920/CsaV3_2G013320/CsaV3_2G030420/CsaV3_3G021780/CsaV3_6G040430	CsaV3_1G003090/CsaV3_1G035920/CsaV3_2G013320/CsaV3_2G030420/CsaV3_3G021780/CsaV3_6G040430	6
BP	GO:0006650	glycerophospholipid metabolic process	4/504	31/6278	0.23488	0.680118	CsaV3_4G029670/CsaV3_5G024510/CsaV3_6G006390/CsaV3_6G041580	CsaV3_4G029670/CsaV3_5G024510/CsaV3_6G006390/CsaV3_6G041580	4
BP	GO:0019439	aromatic compound catabolic process	6/504	52/6278	0.236251	0.680118	CsaV3_1G003090/CsaV3_1G035920/CsaV3_2G013320/CsaV3_2G030420/CsaV3_3G021780/CsaV3_6G040430	CsaV3_1G003090/CsaV3_1G035920/CsaV3_2G013320/CsaV3_2G030420/CsaV3_3G021780/CsaV3_6G040430	6
BP	GO:0009119	ribonucleoside metabolic process	2/504	1599368	0.249925	0.708743	CsaV3_3G007170/CsaV3_5G002770	CsaV3_3G007170/CsaV3_5G002770	2
BP	GO:0010629	negative regulation of gene expression	2/504	1599368	0.249925	0.708743	CsaV3_5G008130/CsaV3_7G030200	CsaV3_5G008130/CsaV3_7G030200	2
BP	GO:0009116	nucleoside metabolic process	3/504	22/6278	0.257342	0.719044	CsaV3_3G007170/CsaV3_5G002770/CsaV3_7G000760	CsaV3_3G007170/CsaV3_5G002770/CsaV3_7G000760	3
BP	GO:1901657	glycosyl compound metabolic process	3/504	22/6278	0.257342	0.719044	CsaV3_3G007170/CsaV3_5G002770/CsaV3_7G000760	CsaV3_3G007170/CsaV3_5G002770/CsaV3_7G000760	3
BP	GO:0032787	monocarboxylic acid metabolic process	9/504	88/6278	0.273066	0.740888	CsaV3_1G003090/CsaV3_1G009790/CsaV3_1G035920/CsaV3_2G013320/CsaV3_2G030420/CsaV3_3G010300/CsaV3_3G021780/CsaV3_5G023610/CsaV3_6G040430	CsaV3_1G003090/CsaV3_1G009790/CsaV3_1G035920/CsaV3_2G013320/CsaV3_2G030420/CsaV3_3G010300/CsaV3_3G021780/CsaV3_5G023610/CsaV3_6G040430	9
BP	GO:0006855	drug transmembrane transport	5/504	44/6278	0.276381	0.740888	CsaV3_1G001040/CsaV3_1G011510/CsaV3_2G008050/CsaV3_3G019490/CsaV3_7G003640	CsaV3_1G001040/CsaV3_1G011510/CsaV3_2G008050/CsaV3_3G019490/CsaV3_7G003640	5
BP	GO:0015893	drug transport	5/504	44/6278	0.276381	0.740888	CsaV3_1G001040/CsaV3_1G011510/CsaV3_2G008050/CsaV3_3G019490/CsaV3_7G003640	CsaV3_1G001040/CsaV3_1G011510/CsaV3_2G008050/CsaV3_3G019490/CsaV3_7G003640	5
BP	GO:0042493	response to drug	5/504	44/6278	0.276381	0.740888	CsaV3_1G001040/CsaV3_1G011510/CsaV3_2G008050/CsaV3_3G019490/CsaV3_7G003640	CsaV3_1G001040/CsaV3_1G011510/CsaV3_2G008050/CsaV3_3G019490/CsaV3_7G003640	5
BP	GO:0007010	cytoskeleton organization	3/504	23/6278	0.27979	0.740888	CsaV3_2G008570/CsaV3_4G031280/CsaV3_7G023520	CsaV3_2G008570/CsaV3_4G031280/CsaV3_7G023520	3
BP	GO:0006284	base-excision repair	2/504	13/6278	0.280758	0.740888	CsaV3_1G008250/CsaV3_6G007600	CsaV3_1G008250/CsaV3_6G007600	2
BP	GO:0009892	negative regulation of metabolic process	2/504	13/6278	0.280758	0.740888	CsaV3_5G008130/CsaV3_7G030200	CsaV3_5G008130/CsaV3_7G030200	2
BP	GO:0010605	negative regulation of macromolecule metabolic process	2/504	13/6278	0.280758	0.740888	CsaV3_5G008130/CsaV3_7G030200	CsaV3_5G008130/CsaV3_7G030200	2
BP	GO:0016043	cellular component organization	17/504	183/6278	0.299265	0.763635	CsaV3_2G008570/CsaV3_2G018180/CsaV3_2G018190/CsaV3_3G016100/CsaV3_3G019280/CsaV3_4G031280/CsaV3_4G034020/CsaV3_5G025150/CsaV3_5G027630/CsaV3_5G028660/CsaV3_5G033110/CsaV3_6G004490/CsaV3_6G007420/CsaV3_6G035790/CsaV3_6G049200/CsaV3_7G022520/CsaV3_7G023520	CsaV3_2G008570/CsaV3_2G018180/CsaV3_2G018190/CsaV3_3G016100/CsaV3_3G019280/CsaV3_4G031280/CsaV3_4G034020/CsaV3_5G025150/CsaV3_5G027630/CsaV3_5G028660/CsaV3_5G033110/CsaV3_6G004490/CsaV3_6G007420/CsaV3_6G035790/CsaV3_6G049200/CsaV3_7G022520/CsaV3_7G023520	17
BP	GO:0006399	tRNA metabolic process	7/504	68/6278	0.303277	0.763635	CsaV3_1G038230/CsaV3_2G008510/CsaV3_3G002020/CsaV3_3G014650/CsaV3_4G003190/CsaV3_5G026430/CsaV3_6G048760	CsaV3_1G038230/CsaV3_2G008510/CsaV3_3G002020/CsaV3_3G014650/CsaV3_4G003190/CsaV3_5G026430/CsaV3_6G048760	7
BP	GO:0046486	glycerolipid metabolic process	4/504	35/6278	0.308122	0.763635	CsaV3_4G029670/CsaV3_5G024510/CsaV3_6G006390/CsaV3_6G041580	CsaV3_4G029670/CsaV3_5G024510/CsaV3_6G006390/CsaV3_6G041580	4
BP	GO:1902600	proton transmembrane transport	4/504	35/6278	0.308122	0.763635	CsaV3_3G010470/CsaV3_5G034810/CsaV3_5G036470/CsaV3_UNG052430	CsaV3_3G010470/CsaV3_5G034810/CsaV3_5G036470/CsaV3_UNG052430	4
BP	GO:0006575	cellular modified amino acid metabolic process	2/504	14/6278	0.311483	0.763635	CsaV3_3G009100/CsaV3_5G008630	CsaV3_3G009100/CsaV3_5G008630	2
BP	GO:0006576	cellular biogenic amine metabolic process	2/504	14/6278	0.311483	0.763635	CsaV3_3G043270/CsaV3_6G005510	CsaV3_3G043270/CsaV3_6G005510	2
BP	GO:0022402	cell cycle process	2/504	14/6278	0.311483	0.763635	CsaV3_5G025150/CsaV3_5G033110	CsaV3_5G025150/CsaV3_5G033110	2
BP	GO:0022900	electron transport chain	2/504	14/6278	0.311483	0.763635	CsaV3_2G024700/CsaV3_6G044180	CsaV3_2G024700/CsaV3_6G044180	2
BP	GO:0033014	tetrapyrrole biosynthetic process	2/504	14/6278	0.311483	0.763635	CsaV3_2G028140/CsaV3_4G008050	CsaV3_2G028140/CsaV3_4G008050	2
BP	GO:0044106	cellular amine metabolic process	2/504	14/6278	0.311483	0.763635	CsaV3_3G043270/CsaV3_6G005510	CsaV3_3G043270/CsaV3_6G005510	2
BP	GO:0072527	pyrimidine-containing compound metabolic process	2/504	14/6278	0.311483	0.763635	CsaV3_2G028630/CsaV3_3G007170	CsaV3_2G028630/CsaV3_3G007170	2
BP	GO:0098655	cation transmembrane transport	6/504	58/6278	0.320959	0.771927	CsaV3_1G035760/CsaV3_3G010470/CsaV3_4G000620/CsaV3_5G034810/CsaV3_5G036470/CsaV3_UNG052430	CsaV3_1G035760/CsaV3_3G010470/CsaV3_4G000620/CsaV3_5G034810/CsaV3_5G036470/CsaV3_UNG052430	6
BP	GO:0098660	inorganic ion transmembrane transport	6/504	58/6278	0.320959	0.771927	CsaV3_1G035760/CsaV3_3G010470/CsaV3_4G000620/CsaV3_5G034810/CsaV3_5G036470/CsaV3_UNG052430	CsaV3_1G035760/CsaV3_3G010470/CsaV3_4G000620/CsaV3_5G034810/CsaV3_5G036470/CsaV3_UNG052430	6
BP	GO:0098662	inorganic cation transmembrane transport	6/504	58/6278	0.320959	0.771927	CsaV3_1G035760/CsaV3_3G010470/CsaV3_4G000620/CsaV3_5G034810/CsaV3_5G036470/CsaV3_UNG052430	CsaV3_1G035760/CsaV3_3G010470/CsaV3_4G000620/CsaV3_5G034810/CsaV3_5G036470/CsaV3_UNG052430	6
BP	GO:0006470	protein dephosphorylation	2/504	15/6278	0.34192	0.807016	CsaV3_4G025970/CsaV3_5G035770	CsaV3_4G025970/CsaV3_5G035770	2
BP	GO:0006605	protein targeting	2/504	15/6278	0.34192	0.807016	CsaV3_3G015480/CsaV3_6G004490	CsaV3_3G015480/CsaV3_6G004490	2
BP	GO:0016311	dephosphorylation	2/504	15/6278	0.34192	0.807016	CsaV3_4G025970/CsaV3_5G035770	CsaV3_4G025970/CsaV3_5G035770	2
BP	GO:0072594	establishment of protein localization to organelle	2/504	17/6278	0.401349	0.907331	CsaV3_3G015480/CsaV3_6G004490	CsaV3_3G015480/CsaV3_6G004490	2
BP	GO:0034220	ion transmembrane transport	7/504	76/6278	0.410587	0.907331	CsaV3_1G035760/CsaV3_3G010470/CsaV3_4G000620/CsaV3_5G034810/CsaV3_5G036470/CsaV3_7G007920/CsaV3_UNG052430	CsaV3_1G035760/CsaV3_3G010470/CsaV3_4G000620/CsaV3_5G034810/CsaV3_5G036470/CsaV3_7G007920/CsaV3_UNG052430	7
BP	GO:0006720	isoprenoid metabolic process	2/504	18/6278	0.430113	0.907331	CsaV3_2G001370/CsaV3_3G006740	CsaV3_2G001370/CsaV3_3G006740	2
BP	GO:0008299	isoprenoid biosynthetic process	2/504	18/6278	0.430113	0.907331	CsaV3_2G001370/CsaV3_3G006740	CsaV3_2G001370/CsaV3_3G006740	2
BP	GO:0009719	response to endogenous stimulus	5/504	55/6278	0.455358	0.907331	CsaV3_2G015380/CsaV3_7G000680/CsaV3_7G000690/CsaV3_7G000720/CsaV3_7G033620	CsaV3_2G015380/CsaV3_7G000680/CsaV3_7G000690/CsaV3_7G000720/CsaV3_7G033620	5
BP	GO:0009725	response to hormone	5/504	55/6278	0.455358	0.907331	CsaV3_2G015380/CsaV3_7G000680/CsaV3_7G000690/CsaV3_7G000720/CsaV3_7G033620	CsaV3_2G015380/CsaV3_7G000680/CsaV3_7G000690/CsaV3_7G000720/CsaV3_7G033620	5
BP	GO:0010033	response to organic substance	5/504	55/6278	0.455358	0.907331	CsaV3_2G015380/CsaV3_7G000680/CsaV3_7G000690/CsaV3_7G000720/CsaV3_7G033620	CsaV3_2G015380/CsaV3_7G000680/CsaV3_7G000690/CsaV3_7G000720/CsaV3_7G033620	5
BP	GO:0015672	monovalent inorganic cation transport	5/504	55/6278	0.455358	0.907331	CsaV3_3G010470/CsaV3_4G000620/CsaV3_5G034810/CsaV3_5G036470/CsaV3_UNG052430	CsaV3_3G010470/CsaV3_4G000620/CsaV3_5G034810/CsaV3_5G036470/CsaV3_UNG052430	5
BP	GO:0016192	vesicle-mediated transport	10/504	116/6278	0.455665	0.907331	CsaV3_1G009630/CsaV3_1G027860/CsaV3_3G028850/CsaV3_3G030800/CsaV3_6G001890/CsaV3_6G006180/CsaV3_6G014610/CsaV3_6G030940/CsaV3_7G003330/CsaV3_7G033810	CsaV3_1G009630/CsaV3_1G027860/CsaV3_3G028850/CsaV3_3G030800/CsaV3_6G001890/CsaV3_6G006180/CsaV3_6G014610/CsaV3_6G030940/CsaV3_7G003330/CsaV3_7G033810	10
BP	GO:0000271	polysaccharide biosynthetic process	4/504	43/6278	0.457354	0.907331	CsaV3_2G018300/CsaV3_2G034730/CsaV3_3G046510/CsaV3_7G031450	CsaV3_2G018300/CsaV3_2G034730/CsaV3_3G046510/CsaV3_7G031450	4
BP	GO:0009250	glucan biosynthetic process	4/504	43/6278	0.457354	0.907331	CsaV3_2G018300/CsaV3_2G034730/CsaV3_3G046510/CsaV3_7G031450	CsaV3_2G018300/CsaV3_2G034730/CsaV3_3G046510/CsaV3_7G031450	4
BP	GO:0033692	cellular polysaccharide biosynthetic process	4/504	43/6278	0.457354	0.907331	CsaV3_2G018300/CsaV3_2G034730/CsaV3_3G046510/CsaV3_7G031450	CsaV3_2G018300/CsaV3_2G034730/CsaV3_3G046510/CsaV3_7G031450	4
BP	GO:0051273	beta-glucan metabolic process	4/504	43/6278	0.457354	0.907331	CsaV3_2G018300/CsaV3_2G034730/CsaV3_3G046510/CsaV3_7G031450	CsaV3_2G018300/CsaV3_2G034730/CsaV3_3G046510/CsaV3_7G031450	4
BP	GO:0051274	beta-glucan biosynthetic process	4/504	43/6278	0.457354	0.907331	CsaV3_2G018300/CsaV3_2G034730/CsaV3_3G046510/CsaV3_7G031450	CsaV3_2G018300/CsaV3_2G034730/CsaV3_3G046510/CsaV3_7G031450	4
BP	GO:0006643	membrane lipid metabolic process	2/504	19/6278	0.458127	0.907331	CsaV3_5G014080/CsaV3_6G006390	CsaV3_5G014080/CsaV3_6G006390	2
BP	GO:0009072	aromatic amino acid family metabolic process	2/504	19/6278	0.458127	0.907331	CsaV3_3G004760/CsaV3_3G043270	CsaV3_3G004760/CsaV3_3G043270	2
BP	GO:0033013	tetrapyrrole metabolic process	2/504	19/6278	0.458127	0.907331	CsaV3_2G028140/CsaV3_4G008050	CsaV3_2G028140/CsaV3_4G008050	2
BP	GO:0051726	regulation of cell cycle	2/504	19/6278	0.458127	0.907331	CsaV3_5G025150/CsaV3_5G033110	CsaV3_5G025150/CsaV3_5G033110	2
BP	GO:0006397	mRNA processing	3/504	31/6278	0.458785	0.907331	CsaV3_1G004910/CsaV3_2G002010/CsaV3_4G025970	CsaV3_1G004910/CsaV3_2G002010/CsaV3_4G025970	3
BP	GO:0007049	cell cycle	3/504	31/6278	0.458785	0.907331	CsaV3_2G006500/CsaV3_5G025150/CsaV3_5G033110	CsaV3_2G006500/CsaV3_5G025150/CsaV3_5G033110	3
BP	GO:0006886	intracellular protein transport	7/504	80/6278	0.464357	0.907331	CsaV3_3G015480/CsaV3_3G033250/CsaV3_6G001890/CsaV3_6G004490/CsaV3_6G006390/CsaV3_6G014610/CsaV3_7G003330	CsaV3_3G015480/CsaV3_3G033250/CsaV3_6G001890/CsaV3_6G004490/CsaV3_6G006390/CsaV3_6G014610/CsaV3_7G003330	7
BP	GO:0016051	carbohydrate biosynthetic process	6/504	68/6278	0.4677	0.907331	CsaV3_2G018300/CsaV3_2G030420/CsaV3_2G034730/CsaV3_3G046510/CsaV3_6G045560/CsaV3_7G031450	CsaV3_2G018300/CsaV3_2G030420/CsaV3_2G034730/CsaV3_3G046510/CsaV3_6G045560/CsaV3_7G031450	6
BP	GO:0032446	protein modification by small protein conjugation	4/504	44/6278	0.475451	0.907331	CsaV3_1G034080/CsaV3_1G043860/CsaV3_3G013600/CsaV3_5G031630	CsaV3_1G034080/CsaV3_1G043860/CsaV3_3G013600/CsaV3_5G031630	4
BP	GO:0071840	cellular component organization or biogenesis	18/504	218/6278	0.486841	0.907331	CsaV3_2G008570/CsaV3_2G018180/CsaV3_2G018190/CsaV3_3G016100/CsaV3_3G019280/CsaV3_4G031280/CsaV3_4G034020/CsaV3_5G006380/CsaV3_5G025150/CsaV3_5G027630/CsaV3_5G028660/CsaV3_5G033110/CsaV3_6G004490/CsaV3_6G007420/CsaV3_6G035790/CsaV3_6G049200/CsaV3_7G022520/CsaV3_7G023520	CsaV3_2G008570/CsaV3_2G018180/CsaV3_2G018190/CsaV3_3G016100/CsaV3_3G019280/CsaV3_4G031280/CsaV3_4G034020/CsaV3_5G006380/CsaV3_5G025150/CsaV3_5G027630/CsaV3_5G028660/CsaV3_5G033110/CsaV3_6G004490/CsaV3_6G007420/CsaV3_6G035790/CsaV3_6G049200/CsaV3_7G022520/CsaV3_7G023520	18
BP	GO:0044262	cellular carbohydrate metabolic process	8/504	96/6278	0.510431	0.907331	CsaV3_1G005170/CsaV3_2G018300/CsaV3_2G034730/CsaV3_3G023420/CsaV3_3G036070/CsaV3_3G046510/CsaV3_6G045560/CsaV3_7G031450	CsaV3_1G005170/CsaV3_2G018300/CsaV3_2G034730/CsaV3_3G023420/CsaV3_3G036070/CsaV3_3G046510/CsaV3_6G045560/CsaV3_7G031450	8
BP	GO:0006644	phospholipid metabolic process	4/504	46/6278	0.51092	0.907331	CsaV3_4G029670/CsaV3_5G024510/CsaV3_6G006390/CsaV3_6G041580	CsaV3_4G029670/CsaV3_5G024510/CsaV3_6G006390/CsaV3_6G041580	4
BP	GO:0006633	fatty acid biosynthetic process	3/504	34/6278	0.521459	0.907331	CsaV3_1G009790/CsaV3_3G010300/CsaV3_5G023610	CsaV3_1G009790/CsaV3_3G010300/CsaV3_5G023610	3
BP	GO:0008037	cell recognition	3/504	34/6278	0.521459	0.907331	CsaV3_1G011480/CsaV3_1G011540/CsaV3_3G021760	CsaV3_1G011480/CsaV3_1G011540/CsaV3_3G021760	3
BP	GO:0009451	RNA modification	3/504	34/6278	0.521459	0.907331	CsaV3_2G024410/CsaV3_6G037280/CsaV3_UNG004080	CsaV3_2G024410/CsaV3_6G037280/CsaV3_UNG004080	3
BP	GO:0009856	pollination	3/504	34/6278	0.521459	0.907331	CsaV3_1G011480/CsaV3_1G011540/CsaV3_3G021760	CsaV3_1G011480/CsaV3_1G011540/CsaV3_3G021760	3
BP	GO:0009875	pollen-pistil interaction	3/504	34/6278	0.521459	0.907331	CsaV3_1G011480/CsaV3_1G011540/CsaV3_3G021760	CsaV3_1G011480/CsaV3_1G011540/CsaV3_3G021760	3
BP	GO:0044706	multi-multicellular organism process	3/504	34/6278	0.521459	0.907331	CsaV3_1G011480/CsaV3_1G011540/CsaV3_3G021760	CsaV3_1G011480/CsaV3_1G011540/CsaV3_3G021760	3
BP	GO:0048544	recognition of pollen	3/504	34/6278	0.521459	0.907331	CsaV3_1G011480/CsaV3_1G011540/CsaV3_3G021760	CsaV3_1G011480/CsaV3_1G011540/CsaV3_3G021760	3
BP	GO:0006352	DNA-templated transcription, initiation	2/504	22/6278	0.537091	0.907331	CsaV3_1G041520/CsaV3_7G003000	CsaV3_1G041520/CsaV3_7G003000	2
BP	GO:0016071	mRNA metabolic process	3/504	35/6278	0.541459	0.907331	CsaV3_1G004910/CsaV3_2G002010/CsaV3_4G025970	CsaV3_1G004910/CsaV3_2G002010/CsaV3_4G025970	3
BP	GO:0018193	peptidyl-amino acid modification	3/504	35/6278	0.541459	0.907331	CsaV3_3G037500/CsaV3_6G007420/CsaV3_7G030050	CsaV3_3G037500/CsaV3_6G007420/CsaV3_7G030050	3
BP	GO:0034660	ncRNA metabolic process	7/504	86/6278	0.542537	0.907331	CsaV3_1G038230/CsaV3_2G008510/CsaV3_3G002020/CsaV3_3G014650/CsaV3_4G003190/CsaV3_5G026430/CsaV3_6G048760	CsaV3_1G038230/CsaV3_2G008510/CsaV3_3G002020/CsaV3_3G014650/CsaV3_4G003190/CsaV3_5G026430/CsaV3_6G048760	7
BP	GO:0034637	cellular carbohydrate biosynthetic process	5/504	61/6278	0.548757	0.907331	CsaV3_2G018300/CsaV3_2G034730/CsaV3_3G046510/CsaV3_6G045560/CsaV3_7G031450	CsaV3_2G018300/CsaV3_2G034730/CsaV3_3G046510/CsaV3_6G045560/CsaV3_7G031450	5
BP	GO:0051641	cellular localization	9/504	113/6278	0.560878	0.907331	CsaV3_3G015480/CsaV3_3G033250/CsaV3_6G001890/CsaV3_6G004490/CsaV3_6G006180/CsaV3_6G006390/CsaV3_6G014610/CsaV3_6G030940/CsaV3_7G003330	CsaV3_3G015480/CsaV3_3G033250/CsaV3_6G001890/CsaV3_6G004490/CsaV3_6G006180/CsaV3_6G006390/CsaV3_6G014610/CsaV3_6G030940/CsaV3_7G003330	9
BP	GO:0000003	reproduction	3/504	36/6278	0.560969	0.907331	CsaV3_1G011480/CsaV3_1G011540/CsaV3_3G021760	CsaV3_1G011480/CsaV3_1G011540/CsaV3_3G021760	3
BP	GO:0022414	reproductive process	3/504	36/6278	0.560969	0.907331	CsaV3_1G011480/CsaV3_1G011540/CsaV3_3G021760	CsaV3_1G011480/CsaV3_1G011540/CsaV3_3G021760	3
BP	GO:0000413	protein peptidyl-prolyl isomerization	2/504	23/6278	0.561596	0.907331	CsaV3_3G037500/CsaV3_7G030050	CsaV3_3G037500/CsaV3_7G030050	2
BP	GO:0001522	pseudouridine synthesis	2/504	23/6278	0.561596	0.907331	CsaV3_2G024410/CsaV3_UNG004080	CsaV3_2G024410/CsaV3_UNG004080	2
BP	GO:0005984	disaccharide metabolic process	2/504	23/6278	0.561596	0.907331	CsaV3_1G005170/CsaV3_6G045560	CsaV3_1G005170/CsaV3_6G045560	2
BP	GO:0018208	peptidyl-proline modification	2/504	23/6278	0.561596	0.907331	CsaV3_3G037500/CsaV3_7G030050	CsaV3_3G037500/CsaV3_7G030050	2
BP	GO:0048519	negative regulation of biological process	2/504	23/6278	0.561596	0.907331	CsaV3_5G008130/CsaV3_7G030200	CsaV3_5G008130/CsaV3_7G030200	2
BP	GO:0000041	transition metal ion transport	1/504	1599307	0.567205	0.907331	CsaV3_1G035760	CsaV3_1G035760	1
BP	GO:0006505	GPI anchor metabolic process	1/504	1599307	0.567205	0.907331	CsaV3_6G006390	CsaV3_6G006390	1
BP	GO:0006541	glutamine metabolic process	1/504	1599307	0.567205	0.907331	CsaV3_5G023920	CsaV3_5G023920	1
BP	GO:0006612	protein targeting to membrane	1/504	1599307	0.567205	0.907331	CsaV3_3G015480	CsaV3_3G015480	1
BP	GO:0006613	cotranslational protein targeting to membrane	1/504	1599307	0.567205	0.907331	CsaV3_3G015480	CsaV3_3G015480	1
BP	GO:0006614	SRP-dependent cotranslational protein targeting to membrane	1/504	1599307	0.567205	0.907331	CsaV3_3G015480	CsaV3_3G015480	1
BP	GO:0010638	positive regulation of organelle organization	1/504	1599307	0.567205	0.907331	CsaV3_4G031280	CsaV3_4G031280	1
BP	GO:0031334	positive regulation of protein complex assembly	1/504	1599307	0.567205	0.907331	CsaV3_4G031280	CsaV3_4G031280	1
BP	GO:0032273	positive regulation of protein polymerization	1/504	1599307	0.567205	0.907331	CsaV3_4G031280	CsaV3_4G031280	1
BP	GO:0044089	positive regulation of cellular component biogenesis	1/504	1599307	0.567205	0.907331	CsaV3_4G031280	CsaV3_4G031280	1
BP	GO:0045047	protein targeting to ER	1/504	1599307	0.567205	0.907331	CsaV3_3G015480	CsaV3_3G015480	1
BP	GO:0051495	positive regulation of cytoskeleton organization	1/504	1599307	0.567205	0.907331	CsaV3_4G031280	CsaV3_4G031280	1
BP	GO:0072599	establishment of protein localization to endoplasmic reticulum	1/504	1599307	0.567205	0.907331	CsaV3_3G015480	CsaV3_3G015480	1
BP	GO:1902905	positive regulation of supramolecular fiber organization	1/504	1599307	0.567205	0.907331	CsaV3_4G031280	CsaV3_4G031280	1
BP	GO:0006457	protein folding	5/504	63/6278	0.578166	0.907331	CsaV3_1G007990/CsaV3_3G037500/CsaV3_5G038350/CsaV3_6G037470/CsaV3_7G030050	CsaV3_1G007990/CsaV3_3G037500/CsaV3_5G038350/CsaV3_6G037470/CsaV3_7G030050	5
BP	GO:0044255	cellular lipid metabolic process	10/504	128/6278	0.584158	0.907331	CsaV3_1G009790/CsaV3_2G001370/CsaV3_3G006740/CsaV3_3G010300/CsaV3_4G029670/CsaV3_5G014080/CsaV3_5G023610/CsaV3_5G024510/CsaV3_6G006390/CsaV3_6G041580	CsaV3_1G009790/CsaV3_2G001370/CsaV3_3G006740/CsaV3_3G010300/CsaV3_4G029670/CsaV3_5G014080/CsaV3_5G023610/CsaV3_5G024510/CsaV3_6G006390/CsaV3_6G041580	10
BP	GO:0033365	protein localization to organelle	2/504	24/6278	0.585159	0.907331	CsaV3_3G015480/CsaV3_6G004490	CsaV3_3G015480/CsaV3_6G004490	2
BP	GO:0005975	carbohydrate metabolic process	35/504	446/6278	0.585199	0.907331	CsaV3_1G003090/CsaV3_1G004550/CsaV3_1G005170/CsaV3_1G032200/CsaV3_1G033780/CsaV3_1G035920/CsaV3_2G013100/CsaV3_2G013320/CsaV3_2G018300/CsaV3_2G024660/CsaV3_2G030420/CsaV3_2G034730/CsaV3_3G021780/CsaV3_3G023420/CsaV3_3G036070/CsaV3_3G036980/CsaV3_3G045760/CsaV3_3G046510/CsaV3_4G000960/CsaV3_4G005770/CsaV3_4G006540/CsaV3_4G008840/CsaV3_4G023300/CsaV3_5G003980/CsaV3_5G031360/CsaV3_5G031490/CsaV3_5G0…	CsaV3_1G003090/CsaV3_1G004550/CsaV3_1G005170/CsaV3_1G032200/CsaV3_1G033780/CsaV3_1G035920/CsaV3_2G013100/CsaV3_2G013320/CsaV3_2G018300/CsaV3_2G024660/CsaV3_2G030420/CsaV3_2G034730/CsaV3_3G021780/CsaV3_3G023420/CsaV3_3G036070/CsaV3_3G036980/CsaV3_3G045760/CsaV3_3G046510/CsaV3_4G000960/CsaV3_4G005770/CsaV3_4G006540/CsaV3_4G008840/CsaV3_4G023300/CsaV3_5G003980/CsaV3_5G031360/CsaV3_5G031490/CsaV3_5G0…	35
BP	GO:0000375	RNA splicing, via transesterification reactions	1/504	1599338	0.602005	0.907331	CsaV3_2G002010	CsaV3_2G002010	1
BP	GO:0000377	RNA splicing, via transesterification reactions with bulged adenosine as nucleophile	1/504	1599338	0.602005	0.907331	CsaV3_2G002010	CsaV3_2G002010	1
BP	GO:0000398	mRNA splicing, via spliceosome	1/504	1599338	0.602005	0.907331	CsaV3_2G002010	CsaV3_2G002010	1
BP	GO:0006414	translational elongation	1/504	1599338	0.602005	0.907331	CsaV3_3G033100	CsaV3_3G033100	1
BP	GO:0009084	glutamine family amino acid biosynthetic process	1/504	1599338	0.602005	0.907331	CsaV3_5G023920	CsaV3_5G023920	1
BP	GO:0009664	plant-type cell wall organization	1/504	1599338	0.602005	0.907331	CsaV3_3G019280	CsaV3_3G019280	1
BP	GO:0016042	lipid catabolic process	1/504	1599338	0.602005	0.907331	CsaV3_3G020970	CsaV3_3G020970	1
BP	GO:0018205	peptidyl-lysine modification	1/504	1599338	0.602005	0.907331	CsaV3_6G007420	CsaV3_6G007420	1
BP	GO:0019684	photosynthesis, light reaction	1/504	1599338	0.602005	0.907331	CsaV3_7G022520	CsaV3_7G022520	1
BP	GO:0043414	macromolecule methylation	1/504	1599338	0.602005	0.907331	CsaV3_6G007420	CsaV3_6G007420	1
BP	GO:0071669	plant-type cell wall organization or biogenesis	1/504	1599338	0.602005	0.907331	CsaV3_3G019280	CsaV3_3G019280	1
BP	GO:0034613	cellular protein localization	7/504	91/6278	0.603868	0.907331	CsaV3_3G015480/CsaV3_3G033250/CsaV3_6G001890/CsaV3_6G004490/CsaV3_6G006390/CsaV3_6G014610/CsaV3_7G003330	CsaV3_3G015480/CsaV3_3G033250/CsaV3_6G001890/CsaV3_6G004490/CsaV3_6G006390/CsaV3_6G014610/CsaV3_7G003330	7
BP	GO:0046907	intracellular transport	7/504	91/6278	0.603868	0.907331	CsaV3_3G015480/CsaV3_3G033250/CsaV3_6G001890/CsaV3_6G004490/CsaV3_6G006390/CsaV3_6G014610/CsaV3_7G003330	CsaV3_3G015480/CsaV3_3G033250/CsaV3_6G001890/CsaV3_6G004490/CsaV3_6G006390/CsaV3_6G014610/CsaV3_7G003330	7
BP	GO:0051649	establishment of localization in cell	7/504	91/6278	0.603868	0.907331	CsaV3_3G015480/CsaV3_3G033250/CsaV3_6G001890/CsaV3_6G004490/CsaV3_6G006390/CsaV3_6G014610/CsaV3_7G003330	CsaV3_3G015480/CsaV3_3G033250/CsaV3_6G001890/CsaV3_6G004490/CsaV3_6G006390/CsaV3_6G014610/CsaV3_7G003330	7
BP	GO:0070727	cellular macromolecule localization	7/504	91/6278	0.603868	0.907331	CsaV3_3G015480/CsaV3_3G033250/CsaV3_6G001890/CsaV3_6G004490/CsaV3_6G006390/CsaV3_6G014610/CsaV3_7G003330	CsaV3_3G015480/CsaV3_3G033250/CsaV3_6G001890/CsaV3_6G004490/CsaV3_6G006390/CsaV3_6G014610/CsaV3_7G003330	7
BP	GO:0006073	cellular glucan metabolic process	5/504	66/6278	0.620295	0.907331	CsaV3_2G018300/CsaV3_2G034730/CsaV3_3G036070/CsaV3_3G046510/CsaV3_7G031450	CsaV3_2G018300/CsaV3_2G034730/CsaV3_3G036070/CsaV3_3G046510/CsaV3_7G031450	5
BP	GO:0044042	glucan metabolic process	5/504	66/6278	0.620295	0.907331	CsaV3_2G018300/CsaV3_2G034730/CsaV3_3G036070/CsaV3_3G046510/CsaV3_7G031450	CsaV3_2G018300/CsaV3_2G034730/CsaV3_3G036070/CsaV3_3G046510/CsaV3_7G031450	5
BP	GO:0044264	cellular polysaccharide metabolic process	5/504	66/6278	0.620295	0.907331	CsaV3_2G018300/CsaV3_2G034730/CsaV3_3G036070/CsaV3_3G046510/CsaV3_7G031450	CsaV3_2G018300/CsaV3_2G034730/CsaV3_3G036070/CsaV3_3G046510/CsaV3_7G031450	5
BP	GO:0009311	oligosaccharide metabolic process	2/504	26/6278	0.629437	0.907331	CsaV3_1G005170/CsaV3_6G045560	CsaV3_1G005170/CsaV3_6G045560	2
BP	GO:0006081	cellular aldehyde metabolic process	1/504	1599368	0.634012	0.907331	CsaV3_4G006330	CsaV3_4G006330	1
BP	GO:0006357	regulation of transcription by RNA polymerase II	1/504	1599368	0.634012	0.907331	CsaV3_7G005510	CsaV3_7G005510	1
BP	GO:0006778	porphyrin-containing compound metabolic process	1/504	1599368	0.634012	0.907331	CsaV3_4G008050	CsaV3_4G008050	1
BP	GO:0009073	aromatic amino acid family biosynthetic process	1/504	1599368	0.634012	0.907331	CsaV3_3G004760	CsaV3_3G004760	1
BP	GO:0016569	covalent chromatin modification	1/504	1599368	0.634012	0.907331	CsaV3_6G007420	CsaV3_6G007420	1
BP	GO:0016570	histone modification	1/504	1599368	0.634012	0.907331	CsaV3_6G007420	CsaV3_6G007420	1
BP	GO:0019318	hexose metabolic process	1/504	1599368	0.634012	0.907331	CsaV3_2G030420	CsaV3_2G030420	1
BP	GO:0032271	regulation of protein polymerization	1/504	1599368	0.634012	0.907331	CsaV3_4G031280	CsaV3_4G031280	1
BP	GO:0042440	pigment metabolic process	1/504	1599368	0.634012	0.907331	CsaV3_2G001370	CsaV3_2G001370	1
BP	GO:0042546	cell wall biogenesis	1/504	1599368	0.634012	0.907331	CsaV3_3G019280	CsaV3_3G019280	1
BP	GO:0043254	regulation of protein complex assembly	1/504	1599368	0.634012	0.907331	CsaV3_4G031280	CsaV3_4G031280	1
BP	GO:0044272	sulfur compound biosynthetic process	1/504	1599368	0.634012	0.907331	CsaV3_3G043020	CsaV3_3G043020	1
BP	GO:0051258	protein polymerization	1/504	1599368	0.634012	0.907331	CsaV3_4G031280	CsaV3_4G031280	1
BP	GO:0051493	regulation of cytoskeleton organization	1/504	1599368	0.634012	0.907331	CsaV3_4G031280	CsaV3_4G031280	1
BP	GO:0072528	pyrimidine-containing compound biosynthetic process	1/504	1599368	0.634012	0.907331	CsaV3_3G007170	CsaV3_3G007170	1
BP	GO:0097435	supramolecular fiber organization	1/504	1599368	0.634012	0.907331	CsaV3_4G031280	CsaV3_4G031280	1
BP	GO:1902903	regulation of supramolecular fiber organization	1/504	1599368	0.634012	0.907331	CsaV3_4G031280	CsaV3_4G031280	1
BP	GO:0015698	inorganic anion transport	2/504	27/6278	0.650159	0.907331	CsaV3_6G052220/CsaV3_7G006330	CsaV3_6G052220/CsaV3_7G006330	2
BP	GO:0032501	multicellular organismal process	4/504	55/6278	0.654588	0.907331	CsaV3_1G011480/CsaV3_1G011540/CsaV3_3G021760/CsaV3_6G042260	CsaV3_1G011480/CsaV3_1G011540/CsaV3_3G021760/CsaV3_6G042260	4
BP	GO:0005996	monosaccharide metabolic process	1/504	13/6278	0.66345	0.907331	CsaV3_2G030420	CsaV3_2G030420	1
BP	GO:0006066	alcohol metabolic process	1/504	13/6278	0.66345	0.907331	CsaV3_3G023420	CsaV3_3G023420	1
BP	GO:0006694	steroid biosynthetic process	1/504	13/6278	0.66345	0.907331	CsaV3_4G037630	CsaV3_4G037630	1
BP	GO:0019751	polyol metabolic process	1/504	13/6278	0.66345	0.907331	CsaV3_3G023420	CsaV3_3G023420	1
BP	GO:0051130	positive regulation of cellular component organization	1/504	13/6278	0.66345	0.907331	CsaV3_4G031280	CsaV3_4G031280	1
BP	GO:0015031	protein transport	8/504	110/6278	0.667225	0.907331	CsaV3_3G015480/CsaV3_3G017320/CsaV3_3G033250/CsaV3_6G001890/CsaV3_6G004490/CsaV3_6G006390/CsaV3_6G014610/CsaV3_7G003330	CsaV3_3G015480/CsaV3_3G017320/CsaV3_3G033250/CsaV3_6G001890/CsaV3_6G004490/CsaV3_6G006390/CsaV3_6G014610/CsaV3_7G003330	8
BP	GO:0015833	peptide transport	8/504	110/6278	0.667225	0.907331	CsaV3_3G015480/CsaV3_3G017320/CsaV3_3G033250/CsaV3_6G001890/CsaV3_6G004490/CsaV3_6G006390/CsaV3_6G014610/CsaV3_7G003330	CsaV3_3G015480/CsaV3_3G017320/CsaV3_3G033250/CsaV3_6G001890/CsaV3_6G004490/CsaV3_6G006390/CsaV3_6G014610/CsaV3_7G003330	8
BP	GO:0042886	amide transport	8/504	110/6278	0.667225	0.907331	CsaV3_3G015480/CsaV3_3G017320/CsaV3_3G033250/CsaV3_6G001890/CsaV3_6G004490/CsaV3_6G006390/CsaV3_6G014610/CsaV3_7G003330	CsaV3_3G015480/CsaV3_3G017320/CsaV3_3G033250/CsaV3_6G001890/CsaV3_6G004490/CsaV3_6G006390/CsaV3_6G014610/CsaV3_7G003330	8
BP	GO:0006325	chromatin organization	2/504	28/6278	0.66995	0.907331	CsaV3_5G028660/CsaV3_6G007420	CsaV3_5G028660/CsaV3_6G007420	2
BP	GO:0022607	cellular component assembly	5/504	70/6278	0.672403	0.907331	CsaV3_3G019280/CsaV3_4G031280/CsaV3_5G025150/CsaV3_5G033110/CsaV3_7G022520	CsaV3_3G019280/CsaV3_4G031280/CsaV3_5G025150/CsaV3_5G033110/CsaV3_7G022520	5
BP	GO:0045229	external encapsulating structure organization	4/504	57/6278	0.682377	0.907331	CsaV3_2G018180/CsaV3_2G018190/CsaV3_3G019280/CsaV3_6G049200	CsaV3_2G018180/CsaV3_2G018190/CsaV3_3G019280/CsaV3_6G049200	4
BP	GO:0071555	cell wall organization	4/504	57/6278	0.682377	0.907331	CsaV3_2G018180/CsaV3_2G018190/CsaV3_3G019280/CsaV3_6G049200	CsaV3_2G018180/CsaV3_2G018190/CsaV3_3G019280/CsaV3_6G049200	4
BP	GO:0016567	protein ubiquitination	3/504	43/6278	0.682577	0.907331	CsaV3_1G034080/CsaV3_1G043860/CsaV3_5G031630	CsaV3_1G034080/CsaV3_1G043860/CsaV3_5G031630	3
BP	GO:0003333	amino acid transmembrane transport	1/504	14/6278	0.690525	0.907331	CsaV3_7G007920	CsaV3_7G007920	1
BP	GO:0005992	trehalose biosynthetic process	1/504	14/6278	0.690525	0.907331	CsaV3_6G045560	CsaV3_6G045560	1
BP	GO:0006333	chromatin assembly or disassembly	1/504	14/6278	0.690525	0.907331	CsaV3_5G028660	CsaV3_5G028660	1
BP	GO:0006664	glycolipid metabolic process	1/504	14/6278	0.690525	0.907331	CsaV3_6G006390	CsaV3_6G006390	1
BP	GO:0006865	amino acid transport	1/504	14/6278	0.690525	0.907331	CsaV3_7G007920	CsaV3_7G007920	1
BP	GO:0008202	steroid metabolic process	1/504	14/6278	0.690525	0.907331	CsaV3_4G037630	CsaV3_4G037630	1
BP	GO:0008380	RNA splicing	1/504	14/6278	0.690525	0.907331	CsaV3_2G002010	CsaV3_2G002010	1
BP	GO:0033043	regulation of organelle organization	1/504	14/6278	0.690525	0.907331	CsaV3_4G031280	CsaV3_4G031280	1
BP	GO:0065009	regulation of molecular function	1/504	14/6278	0.690525	0.907331	CsaV3_7G003000	CsaV3_7G003000	1
BP	GO:1903509	liposaccharide metabolic process	1/504	14/6278	0.690525	0.907331	CsaV3_6G006390	CsaV3_6G006390	1
BP	GO:0051704	multi-organism process	3/504	44/6278	0.697733	0.907331	CsaV3_1G011480/CsaV3_1G011540/CsaV3_3G021760	CsaV3_1G011480/CsaV3_1G011540/CsaV3_3G021760	3
BP	GO:0045184	establishment of protein localization	8/504	115/6278	0.715263	0.907331	CsaV3_3G015480/CsaV3_3G017320/CsaV3_3G033250/CsaV3_6G001890/CsaV3_6G004490/CsaV3_6G006390/CsaV3_6G014610/CsaV3_7G003330	CsaV3_3G015480/CsaV3_3G017320/CsaV3_3G033250/CsaV3_6G001890/CsaV3_6G004490/CsaV3_6G006390/CsaV3_6G014610/CsaV3_7G003330	8
BP	GO:0005991	trehalose metabolic process	1/504	15/6278	0.715425	0.907331	CsaV3_6G045560	CsaV3_6G045560	1
BP	GO:0008272	sulfate transport	1/504	15/6278	0.715425	0.907331	CsaV3_7G006330	CsaV3_7G006330	1
BP	GO:0009064	glutamine family amino acid metabolic process	1/504	15/6278	0.715425	0.907331	CsaV3_5G023920	CsaV3_5G023920	1
BP	GO:0009605	response to external stimulus	1/504	15/6278	0.715425	0.907331	CsaV3_2G022190	CsaV3_2G022190	1
BP	GO:0048522	positive regulation of cellular process	1/504	15/6278	0.715425	0.907331	CsaV3_4G031280	CsaV3_4G031280	1
BP	GO:0048523	negative regulation of cellular process	1/504	15/6278	0.715425	0.907331	CsaV3_7G030200	CsaV3_7G030200	1
BP	GO:0071804	cellular potassium ion transport	1/504	15/6278	0.715425	0.907331	CsaV3_4G000620	CsaV3_4G000620	1
BP	GO:0071805	potassium ion transmembrane transport	1/504	15/6278	0.715425	0.907331	CsaV3_4G000620	CsaV3_4G000620	1
BP	GO:0072348	sulfur compound transport	1/504	15/6278	0.715425	0.907331	CsaV3_7G006330	CsaV3_7G006330	1
BP	GO:0005976	polysaccharide metabolic process	5/504	74/6278	0.719571	0.907331	CsaV3_2G018300/CsaV3_2G034730/CsaV3_3G036070/CsaV3_3G046510/CsaV3_7G031450	CsaV3_2G018300/CsaV3_2G034730/CsaV3_3G036070/CsaV3_3G046510/CsaV3_7G031450	5
BP	GO:0006979	response to oxidative stress	6/504	88/6278	0.720125	0.907331	CsaV3_1G012650/CsaV3_3G042120/CsaV3_3G042140/CsaV3_3G047080/CsaV3_6G002170/CsaV3_6G034310	CsaV3_1G012650/CsaV3_3G042120/CsaV3_3G042140/CsaV3_3G047080/CsaV3_6G002170/CsaV3_6G034310	6
BP	GO:0015979	photosynthesis	3/504	46/6278	0.726386	0.907331	CsaV3_1G015710/CsaV3_2G031600/CsaV3_7G022520	CsaV3_1G015710/CsaV3_2G031600/CsaV3_7G022520	3
BP	GO:0042545	cell wall modification	3/504	46/6278	0.726386	0.907331	CsaV3_2G018180/CsaV3_2G018190/CsaV3_6G049200	CsaV3_2G018180/CsaV3_2G018190/CsaV3_6G049200	3
BP	GO:0046351	disaccharide biosynthetic process	1/504	16/6278	0.738325	0.907331	CsaV3_6G045560	CsaV3_6G045560	1
BP	GO:0048518	positive regulation of biological process	1/504	16/6278	0.738325	0.907331	CsaV3_4G031280	CsaV3_4G031280	1
BP	GO:0070972	protein localization to endoplasmic reticulum	1/504	16/6278	0.738325	0.907331	CsaV3_3G015480	CsaV3_3G015480	1
BP	GO:0030243	cellulose metabolic process	2/504	33/6278	0.755594	0.907331	CsaV3_2G034730/CsaV3_3G046510	CsaV3_2G034730/CsaV3_3G046510	2
BP	GO:0030244	cellulose biosynthetic process	2/504	33/6278	0.755594	0.907331	CsaV3_2G034730/CsaV3_3G046510	CsaV3_2G034730/CsaV3_3G046510	2
BP	GO:0006508	proteolysis	18/504	256/6278	0.758615	0.907331	CsaV3_1G000700/CsaV3_1G000710/CsaV3_1G002070/CsaV3_1G009310/CsaV3_1G041110/CsaV3_2G013240/CsaV3_2G015990/CsaV3_2G031540/CsaV3_3G001680/CsaV3_3G002090/CsaV3_3G010970/CsaV3_4G032560/CsaV3_4G034070/CsaV3_5G006240/CsaV3_5G013700/CsaV3_6G013510/CsaV3_6G032190/CsaV3_7G002320	CsaV3_1G000700/CsaV3_1G000710/CsaV3_1G002070/CsaV3_1G009310/CsaV3_1G041110/CsaV3_2G013240/CsaV3_2G015990/CsaV3_2G031540/CsaV3_3G001680/CsaV3_3G002090/CsaV3_3G010970/CsaV3_4G032560/CsaV3_4G034070/CsaV3_5G006240/CsaV3_5G013700/CsaV3_6G013510/CsaV3_6G032190/CsaV3_7G002320	18
BP	GO:0006413	translational initiation	1/504	17/6278	0.759386	0.907331	CsaV3_3G019240	CsaV3_3G019240	1
BP	GO:0006813	potassium ion transport	1/504	17/6278	0.759386	0.907331	CsaV3_4G000620	CsaV3_4G000620	1
BP	GO:0030258	lipid modification	1/504	17/6278	0.759386	0.907331	CsaV3_6G041580	CsaV3_6G041580	1
BP	GO:0032259	methylation	1/504	17/6278	0.759386	0.907331	CsaV3_6G007420	CsaV3_6G007420	1
BP	GO:0072657	protein localization to membrane	1/504	17/6278	0.759386	0.907331	CsaV3_3G015480	CsaV3_3G015480	1
BP	GO:0090150	establishment of protein localization to membrane	1/504	17/6278	0.759386	0.907331	CsaV3_3G015480	CsaV3_3G015480	1
BP	GO:0098656	anion transmembrane transport	1/504	17/6278	0.759386	0.907331	CsaV3_7G007920	CsaV3_7G007920	1
BP	GO:1901615	organic hydroxy compound metabolic process	1/504	17/6278	0.759386	0.907331	CsaV3_3G023420	CsaV3_3G023420	1
BP	GO:1903825	organic acid transmembrane transport	1/504	17/6278	0.759386	0.907331	CsaV3_7G007920	CsaV3_7G007920	1
BP	GO:1905039	carboxylic acid transmembrane transport	1/504	17/6278	0.759386	0.907331	CsaV3_7G007920	CsaV3_7G007920	1
BP	GO:0008104	protein localization	8/504	121/6278	0.766563	0.907331	CsaV3_3G015480/CsaV3_3G017320/CsaV3_3G033250/CsaV3_6G001890/CsaV3_6G004490/CsaV3_6G006390/CsaV3_6G014610/CsaV3_7G003330	CsaV3_3G015480/CsaV3_3G017320/CsaV3_3G033250/CsaV3_6G001890/CsaV3_6G004490/CsaV3_6G006390/CsaV3_6G014610/CsaV3_7G003330	8
BP	GO:0044248	cellular catabolic process	8/504	121/6278	0.766563	0.907331	CsaV3_1G003090/CsaV3_1G035920/CsaV3_2G013320/CsaV3_2G030420/CsaV3_3G021780/CsaV3_3G023420/CsaV3_4G032560/CsaV3_6G040430	CsaV3_1G003090/CsaV3_1G035920/CsaV3_2G013320/CsaV3_2G030420/CsaV3_3G021780/CsaV3_3G023420/CsaV3_4G032560/CsaV3_6G040430	8
BP	GO:1901575	organic substance catabolic process	9/504	136/6278	0.774612	0.907331	CsaV3_1G003090/CsaV3_1G035920/CsaV3_2G013320/CsaV3_2G030420/CsaV3_3G020970/CsaV3_3G021780/CsaV3_3G023420/CsaV3_4G032560/CsaV3_6G040430	CsaV3_1G003090/CsaV3_1G035920/CsaV3_2G013320/CsaV3_2G030420/CsaV3_3G020970/CsaV3_3G021780/CsaV3_3G023420/CsaV3_4G032560/CsaV3_6G040430	9
BP	GO:0071702	organic substance transport	10/504	150/6278	0.775415	0.907331	CsaV3_3G015480/CsaV3_3G017320/CsaV3_3G033250/CsaV3_6G001890/CsaV3_6G003980/CsaV3_6G004490/CsaV3_6G006390/CsaV3_6G014610/CsaV3_7G003330/CsaV3_7G007920	CsaV3_3G015480/CsaV3_3G017320/CsaV3_3G033250/CsaV3_6G001890/CsaV3_6G003980/CsaV3_6G004490/CsaV3_6G006390/CsaV3_6G014610/CsaV3_7G003330/CsaV3_7G007920	10
BP	GO:0008610	lipid biosynthetic process	6/504	94/6278	0.77707	0.907331	CsaV3_1G009790/CsaV3_2G001370/CsaV3_3G006740/CsaV3_3G010300/CsaV3_4G037630/CsaV3_5G023610	CsaV3_1G009790/CsaV3_2G001370/CsaV3_3G006740/CsaV3_3G010300/CsaV3_4G037630/CsaV3_5G023610	6
BP	GO:0006631	fatty acid metabolic process	3/504	50/6278	0.77726	0.907331	CsaV3_1G009790/CsaV3_3G010300/CsaV3_5G023610	CsaV3_1G009790/CsaV3_3G010300/CsaV3_5G023610	3
BP	GO:0044282	small molecule catabolic process	1/504	18/6278	0.778755	0.907331	CsaV3_3G023420	CsaV3_3G023420	1
BP	GO:0071705	nitrogen compound transport	9/504	137/6278	0.781909	0.907331	CsaV3_3G015480/CsaV3_3G017320/CsaV3_3G033250/CsaV3_6G001890/CsaV3_6G004490/CsaV3_6G006390/CsaV3_6G014610/CsaV3_7G003330/CsaV3_7G007920	CsaV3_3G015480/CsaV3_3G017320/CsaV3_3G033250/CsaV3_6G001890/CsaV3_6G004490/CsaV3_6G006390/CsaV3_6G014610/CsaV3_7G003330/CsaV3_7G007920	9
BP	GO:0009607	response to biotic stimulus	3/504	51/6278	0.788694	0.907331	CsaV3_5G014970/CsaV3_5G015030/CsaV3_5G015140	CsaV3_5G014970/CsaV3_5G015030/CsaV3_5G015140	3
BP	GO:0035556	intracellular signal transduction	7/504	110/6278	0.791108	0.907331	CsaV3_1G004280/CsaV3_2G002140/CsaV3_2G034580/CsaV3_3G009610/CsaV3_3G010020/CsaV3_4G008100/CsaV3_5G008330	CsaV3_1G004280/CsaV3_2G002140/CsaV3_2G034580/CsaV3_3G009610/CsaV3_3G010020/CsaV3_4G008100/CsaV3_5G008330	7
BP	GO:0009312	oligosaccharide biosynthetic process	1/504	19/6278	0.796568	0.907331	CsaV3_6G045560	CsaV3_6G045560	1
BP	GO:0015988	energy coupled proton transmembrane transport, against electrochemical gradient	1/504	19/6278	0.796568	0.907331	CsaV3_5G034810	CsaV3_5G034810	1
BP	GO:0015991	ATP hydrolysis coupled proton transport	1/504	19/6278	0.796568	0.907331	CsaV3_5G034810	CsaV3_5G034810	1
BP	GO:0090662	ATP hydrolysis coupled transmembrane transport	1/504	19/6278	0.796568	0.907331	CsaV3_5G034810	CsaV3_5G034810	1
BP	GO:0099131	ATP hydrolysis coupled ion transmembrane transport	1/504	19/6278	0.796568	0.907331	CsaV3_5G034810	CsaV3_5G034810	1
BP	GO:0099132	ATP hydrolysis coupled cation transmembrane transport	1/504	19/6278	0.796568	0.907331	CsaV3_5G034810	CsaV3_5G034810	1
BP	GO:0006952	defense response	4/504	67/6278	0.797496	0.907331	CsaV3_1G012980/CsaV3_5G014970/CsaV3_5G015030/CsaV3_5G015140	CsaV3_1G012980/CsaV3_5G014970/CsaV3_5G015030/CsaV3_5G015140	4
BP	GO:0042592	homeostatic process	5/504	83/6278	0.80744	0.912015	CsaV3_2G035050/CsaV3_4G034020/CsaV3_5G036690/CsaV3_6G015540/CsaV3_7G029820	CsaV3_2G035050/CsaV3_4G034020/CsaV3_5G036690/CsaV3_6G015540/CsaV3_7G029820	5
BP	GO:0009056	catabolic process	9/504	141/6278	0.809386	0.912015	CsaV3_1G003090/CsaV3_1G035920/CsaV3_2G013320/CsaV3_2G030420/CsaV3_3G020970/CsaV3_3G021780/CsaV3_3G023420/CsaV3_4G032560/CsaV3_6G040430	CsaV3_1G003090/CsaV3_1G035920/CsaV3_2G013320/CsaV3_2G030420/CsaV3_3G020970/CsaV3_3G021780/CsaV3_3G023420/CsaV3_4G032560/CsaV3_6G040430	9
BP	GO:0071554	cell wall organization or biogenesis	4/504	69/6278	0.815956	0.912015	CsaV3_2G018180/CsaV3_2G018190/CsaV3_3G019280/CsaV3_6G049200	CsaV3_2G018180/CsaV3_2G018190/CsaV3_3G019280/CsaV3_6G049200	4
BP	GO:0006486	protein glycosylation	2/504	38/6278	0.821365	0.912015	CsaV3_1G008060/CsaV3_1G010720	CsaV3_1G008060/CsaV3_1G010720	2
BP	GO:0043413	macromolecule glycosylation	2/504	38/6278	0.821365	0.912015	CsaV3_1G008060/CsaV3_1G010720	CsaV3_1G008060/CsaV3_1G010720	2
BP	GO:0033036	macromolecule localization	8/504	129/6278	0.824161	0.912015	CsaV3_3G015480/CsaV3_3G017320/CsaV3_3G033250/CsaV3_6G001890/CsaV3_6G004490/CsaV3_6G006390/CsaV3_6G014610/CsaV3_7G003330	CsaV3_3G015480/CsaV3_3G017320/CsaV3_3G033250/CsaV3_6G001890/CsaV3_6G004490/CsaV3_6G006390/CsaV3_6G014610/CsaV3_7G003330	8
BP	GO:0006396	RNA processing	7/504	115/6278	0.827313	0.912015	CsaV3_1G004910/CsaV3_2G002010/CsaV3_3G007100/CsaV3_3G043900/CsaV3_4G025970/CsaV3_6G043910/CsaV3_7G034980	CsaV3_1G004910/CsaV3_2G002010/CsaV3_3G007100/CsaV3_3G043900/CsaV3_4G025970/CsaV3_6G043910/CsaV3_7G034980	7
BP	GO:0007275	multicellular organism development	1/504	21/6278	0.828014	0.912015	CsaV3_6G042260	CsaV3_6G042260	1
BP	GO:0032502	developmental process	1/504	21/6278	0.828014	0.912015	CsaV3_6G042260	CsaV3_6G042260	1
BP	GO:0048856	anatomical structure development	1/504	21/6278	0.828014	0.912015	CsaV3_6G042260	CsaV3_6G042260	1
BP	GO:0071103	DNA conformation change	1/504	21/6278	0.828014	0.912015	CsaV3_6G035790	CsaV3_6G035790	1
BP	GO:0009100	glycoprotein metabolic process	2/504	41/6278	0.852764	0.930517	CsaV3_1G008060/CsaV3_1G010720	CsaV3_1G008060/CsaV3_1G010720	2
BP	GO:0009101	glycoprotein biosynthetic process	2/504	41/6278	0.852764	0.930517	CsaV3_1G008060/CsaV3_1G010720	CsaV3_1G008060/CsaV3_1G010720	2
BP	GO:0034622	cellular protein-containing complex assembly	2/504	41/6278	0.852764	0.930517	CsaV3_4G031280/CsaV3_7G022520	CsaV3_4G031280/CsaV3_7G022520	2
BP	GO:0006366	transcription by RNA polymerase II	1/504	23/6278	0.854607	0.930517	CsaV3_7G005510	CsaV3_7G005510	1
BP	GO:0044085	cellular component biogenesis	6/504	105/6278	0.858152	0.931708	CsaV3_3G019280/CsaV3_4G031280/CsaV3_5G006380/CsaV3_5G025150/CsaV3_5G033110/CsaV3_7G022520	CsaV3_3G019280/CsaV3_4G031280/CsaV3_5G006380/CsaV3_5G025150/CsaV3_5G033110/CsaV3_7G022520	6
BP	GO:0070085	glycosylation	2/504	42/6278	0.862059	0.931997	CsaV3_1G008060/CsaV3_1G010720	CsaV3_1G008060/CsaV3_1G010720	2
BP	GO:0007154	cell communication	14/504	222/6278	0.863324	0.931997	CsaV3_1G004280/CsaV3_1G011480/CsaV3_1G011540/CsaV3_1G043470/CsaV3_2G002140/CsaV3_2G022190/CsaV3_2G034580/CsaV3_3G007720/CsaV3_3G009610/CsaV3_3G010020/CsaV3_3G021760/CsaV3_3G041210/CsaV3_4G008100/CsaV3_5G008330	CsaV3_1G004280/CsaV3_1G011480/CsaV3_1G011540/CsaV3_1G043470/CsaV3_2G002140/CsaV3_2G022190/CsaV3_2G034580/CsaV3_3G007720/CsaV3_3G009610/CsaV3_3G010020/CsaV3_3G021760/CsaV3_3G041210/CsaV3_4G008100/CsaV3_5G008330	14
BP	GO:0006812	cation transport	12/504	197/6278	0.877909	0.942758	CsaV3_1G030750/CsaV3_1G035760/CsaV3_1G042260/CsaV3_2G018310/CsaV3_3G010470/CsaV3_3G049970/CsaV3_4G000620/CsaV3_4G024620/CsaV3_5G034810/CsaV3_5G036470/CsaV3_7G033760/CsaV3_UNG052430	CsaV3_1G030750/CsaV3_1G035760/CsaV3_1G042260/CsaV3_2G018310/CsaV3_3G010470/CsaV3_3G049970/CsaV3_4G000620/CsaV3_4G024620/CsaV3_5G034810/CsaV3_5G036470/CsaV3_7G033760/CsaV3_UNG052430	12
BP	GO:0006820	anion transport	3/504	61/6278	0.878254	0.942758	CsaV3_6G052220/CsaV3_7G006330/CsaV3_7G007920	CsaV3_6G052220/CsaV3_7G006330/CsaV3_7G007920	3
BP	GO:0065008	regulation of biological quality	6/504	109/6278	0.880881	0.942915	CsaV3_2G035050/CsaV3_4G027750/CsaV3_4G034020/CsaV3_5G036690/CsaV3_6G015540/CsaV3_7G029820	CsaV3_2G035050/CsaV3_4G027750/CsaV3_4G034020/CsaV3_5G036690/CsaV3_6G015540/CsaV3_7G029820	6
BP	GO:0065003	protein-containing complex assembly	2/504	46/6278	0.894103	0.954379	CsaV3_4G031280/CsaV3_7G022520	CsaV3_4G031280/CsaV3_7G022520	2
BP	GO:0045454	cell redox homeostasis	4/504	81/6278	0.899658	0.957619	CsaV3_2G035050/CsaV3_5G036690/CsaV3_6G015540/CsaV3_7G029820	CsaV3_2G035050/CsaV3_5G036690/CsaV3_6G015540/CsaV3_7G029820	4
BP	GO:0006790	sulfur compound metabolic process	1/504	28/6278	0.904487	0.957754	CsaV3_3G043020	CsaV3_3G043020	1
BP	GO:0019725	cellular homeostasis	4/504	82/6278	0.904825	0.957754	CsaV3_2G035050/CsaV3_5G036690/CsaV3_6G015540/CsaV3_7G029820	CsaV3_2G035050/CsaV3_5G036690/CsaV3_6G015540/CsaV3_7G029820	4
BP	GO:0006629	lipid metabolic process	15/504	249/6278	0.908767	0.959254	CsaV3_1G006500/CsaV3_1G009790/CsaV3_1G012180/CsaV3_1G036250/CsaV3_2G001370/CsaV3_3G006740/CsaV3_3G010300/CsaV3_3G020970/CsaV3_4G029670/CsaV3_4G037630/CsaV3_5G014080/CsaV3_5G023610/CsaV3_5G024510/CsaV3_6G006390/CsaV3_6G041580	CsaV3_1G006500/CsaV3_1G009790/CsaV3_1G012180/CsaV3_1G036250/CsaV3_2G001370/CsaV3_3G006740/CsaV3_3G010300/CsaV3_3G020970/CsaV3_4G029670/CsaV3_4G037630/CsaV3_5G014080/CsaV3_5G023610/CsaV3_5G024510/CsaV3_6G006390/CsaV3_6G041580	15
BP	GO:0015711	organic anion transport	1/504	30/6278	0.919271	0.962322	CsaV3_7G007920	CsaV3_7G007920	1
BP	GO:0015849	organic acid transport	1/504	30/6278	0.919271	0.962322	CsaV3_7G007920	CsaV3_7G007920	1
BP	GO:0046942	carboxylic acid transport	1/504	30/6278	0.919271	0.962322	CsaV3_7G007920	CsaV3_7G007920	1
BP	GO:0007165	signal transduction	10/504	184/6278	0.933555	0.967807	CsaV3_1G004280/CsaV3_1G043470/CsaV3_2G002140/CsaV3_2G034580/CsaV3_3G007720/CsaV3_3G009610/CsaV3_3G010020/CsaV3_3G041210/CsaV3_4G008100/CsaV3_5G008330	CsaV3_1G004280/CsaV3_1G043470/CsaV3_2G002140/CsaV3_2G034580/CsaV3_3G007720/CsaV3_3G009610/CsaV3_3G010020/CsaV3_3G041210/CsaV3_4G008100/CsaV3_5G008330	10
BP	GO:0023052	signaling	10/504	184/6278	0.933555	0.967807	CsaV3_1G004280/CsaV3_1G043470/CsaV3_2G002140/CsaV3_2G034580/CsaV3_3G007720/CsaV3_3G009610/CsaV3_3G010020/CsaV3_3G041210/CsaV3_4G008100/CsaV3_5G008330	CsaV3_1G004280/CsaV3_1G043470/CsaV3_2G002140/CsaV3_2G034580/CsaV3_3G007720/CsaV3_3G009610/CsaV3_3G010020/CsaV3_3G041210/CsaV3_4G008100/CsaV3_5G008330	10
BP	GO:0043933	protein-containing complex subunit organization	2/504	54/6278	0.938494	0.967807	CsaV3_4G031280/CsaV3_7G022520	CsaV3_4G031280/CsaV3_7G022520	2
BP	GO:0006511	ubiquitin-dependent protein catabolic process	1/504	34/6278	0.942339	0.967807	CsaV3_4G032560	CsaV3_4G032560	1
BP	GO:0019941	modification-dependent protein catabolic process	1/504	34/6278	0.942339	0.967807	CsaV3_4G032560	CsaV3_4G032560	1
BP	GO:0042254	ribosome biogenesis	1/504	34/6278	0.942339	0.967807	CsaV3_5G006380	CsaV3_5G006380	1
BP	GO:0043632	modification-dependent macromolecule catabolic process	1/504	34/6278	0.942339	0.967807	CsaV3_4G032560	CsaV3_4G032560	1
BP	GO:0006811	ion transport	16/504	280/6278	0.947522	0.970508	CsaV3_1G030750/CsaV3_1G035760/CsaV3_1G042260/CsaV3_2G018310/CsaV3_3G010470/CsaV3_3G041910/CsaV3_3G049970/CsaV3_4G000620/CsaV3_4G024620/CsaV3_5G034810/CsaV3_5G036470/CsaV3_6G052220/CsaV3_7G006330/CsaV3_7G007920/CsaV3_7G033760/CsaV3_UNG052430	CsaV3_1G030750/CsaV3_1G035760/CsaV3_1G042260/CsaV3_2G018310/CsaV3_3G010470/CsaV3_3G041910/CsaV3_3G049970/CsaV3_4G000620/CsaV3_4G024620/CsaV3_5G034810/CsaV3_5G036470/CsaV3_6G052220/CsaV3_7G006330/CsaV3_7G007920/CsaV3_7G033760/CsaV3_UNG052430	16
BP	GO:0022613	ribonucleoprotein complex biogenesis	1/504	36/6278	0.951272	0.97173	CsaV3_5G006380	CsaV3_5G006380	1
BP	GO:0030001	metal ion transport	5/504	115/6278	0.959882	0.977896	CsaV3_1G030750/CsaV3_1G035760/CsaV3_3G049970/CsaV3_4G000620/CsaV3_4G024620	CsaV3_1G030750/CsaV3_1G035760/CsaV3_3G049970/CsaV3_4G000620/CsaV3_4G024620	5
BP	GO:0044257	cellular protein catabolic process	1/504	43/6278	0.972979	0.985952	CsaV3_4G032560	CsaV3_4G032560	1
BP	GO:0051603	proteolysis involved in cellular protein catabolic process	1/504	43/6278	0.972979	0.985952	CsaV3_4G032560	CsaV3_4G032560	1
BP	GO:0055085	transmembrane transport	23/504	409/6278	0.978374	0.986807	CsaV3_1G001040/CsaV3_1G002020/CsaV3_1G011510/CsaV3_1G013170/CsaV3_1G035760/CsaV3_1G042260/CsaV3_2G008050/CsaV3_2G018310/CsaV3_3G010470/CsaV3_3G019490/CsaV3_3G024950/CsaV3_3G041910/CsaV3_4G000150/CsaV3_4G000620/CsaV3_5G030760/CsaV3_5G034810/CsaV3_5G036470/CsaV3_6G004490/CsaV3_6G036180/CsaV3_7G003640/CsaV3_7G007920/CsaV3_7G033760/CsaV3_UNG052430	CsaV3_1G001040/CsaV3_1G002020/CsaV3_1G011510/CsaV3_1G013170/CsaV3_1G035760/CsaV3_1G042260/CsaV3_2G008050/CsaV3_2G018310/CsaV3_3G010470/CsaV3_3G019490/CsaV3_3G024950/CsaV3_3G041910/CsaV3_4G000150/CsaV3_4G000620/CsaV3_5G030760/CsaV3_5G034810/CsaV3_5G036470/CsaV3_6G004490/CsaV3_6G036180/CsaV3_7G003640/CsaV3_7G007920/CsaV3_7G033760/CsaV3_UNG052430	23
BP	GO:0030163	protein catabolic process	1/504	46/6278	0.979017	0.986807	CsaV3_4G032560	CsaV3_4G032560	1
BP	GO:0044265	cellular macromolecule catabolic process	1/504	56/6278	0.990977	0.99622	CsaV3_4G032560	CsaV3_4G032560	1
BP	GO:1901565	organonitrogen compound catabolic process	1/504	68/6278	0.996729	0.998339	CsaV3_4G032560	CsaV3_4G032560	1
BP	GO:0009057	macromolecule catabolic process	1/504	76/6278	0.998339	0.998339	CsaV3_4G032560	CsaV3_4G032560	1
CC	GO:0005840	ribosome	45/189	198/2213	8.6412e-11	7.6623e-09	CsaV3_1G002460/CsaV3_2G001620/CsaV3_2G013510/CsaV3_2G019510/CsaV3_2G032570/CsaV3_2G034130/CsaV3_3G002360/CsaV3_3G004770/CsaV3_3G011000/CsaV3_3G012600/CsaV3_3G015690/CsaV3_3G017240/CsaV3_3G020570/CsaV3_3G022680/CsaV3_3G032360/CsaV3_3G032940/CsaV3_3G042510/CsaV3_4G004050/CsaV3_4G004440/CsaV3_4G008470/CsaV3_4G023230/CsaV3_4G030970/CsaV3_4G032830/CsaV3_4G033460/CsaV3_5G001490/CsaV3_5G003770/CsaV3_5G0…	CsaV3_1G002460/CsaV3_2G001620/CsaV3_2G013510/CsaV3_2G019510/CsaV3_2G032570/CsaV3_2G034130/CsaV3_3G002360/CsaV3_3G004770/CsaV3_3G011000/CsaV3_3G012600/CsaV3_3G015690/CsaV3_3G017240/CsaV3_3G020570/CsaV3_3G022680/CsaV3_3G032360/CsaV3_3G032940/CsaV3_3G042510/CsaV3_4G004050/CsaV3_4G004440/CsaV3_4G008470/CsaV3_4G023230/CsaV3_4G030970/CsaV3_4G032830/CsaV3_4G033460/CsaV3_5G001490/CsaV3_5G003770/CsaV3_5G0…	45
CC	GO:0043228	non-membrane-bounded organelle	55/189	282/2213	2.52603e-10	7.6623e-09	CsaV3_1G002460/CsaV3_2G001620/CsaV3_2G006800/CsaV3_2G010800/CsaV3_2G013510/CsaV3_2G019510/CsaV3_2G032570/CsaV3_2G034130/CsaV3_3G002360/CsaV3_3G004770/CsaV3_3G011000/CsaV3_3G012600/CsaV3_3G015690/CsaV3_3G016100/CsaV3_3G017240/CsaV3_3G020570/CsaV3_3G022680/CsaV3_3G032360/CsaV3_3G032940/CsaV3_3G042510/CsaV3_4G004050/CsaV3_4G004440/CsaV3_4G008470/CsaV3_4G010560/CsaV3_4G023230/CsaV3_4G030970/CsaV3_4G0…	CsaV3_1G002460/CsaV3_2G001620/CsaV3_2G006800/CsaV3_2G010800/CsaV3_2G013510/CsaV3_2G019510/CsaV3_2G032570/CsaV3_2G034130/CsaV3_3G002360/CsaV3_3G004770/CsaV3_3G011000/CsaV3_3G012600/CsaV3_3G015690/CsaV3_3G016100/CsaV3_3G017240/CsaV3_3G020570/CsaV3_3G022680/CsaV3_3G032360/CsaV3_3G032940/CsaV3_3G042510/CsaV3_4G004050/CsaV3_4G004440/CsaV3_4G008470/CsaV3_4G010560/CsaV3_4G023230/CsaV3_4G030970/CsaV3_4G0…	55
CC	GO:0043232	intracellular non-membrane-bounded organelle	55/189	282/2213	2.52603e-10	7.6623e-09	CsaV3_1G002460/CsaV3_2G001620/CsaV3_2G006800/CsaV3_2G010800/CsaV3_2G013510/CsaV3_2G019510/CsaV3_2G032570/CsaV3_2G034130/CsaV3_3G002360/CsaV3_3G004770/CsaV3_3G011000/CsaV3_3G012600/CsaV3_3G015690/CsaV3_3G016100/CsaV3_3G017240/CsaV3_3G020570/CsaV3_3G022680/CsaV3_3G032360/CsaV3_3G032940/CsaV3_3G042510/CsaV3_4G004050/CsaV3_4G004440/CsaV3_4G008470/CsaV3_4G010560/CsaV3_4G023230/CsaV3_4G030970/CsaV3_4G0…	CsaV3_1G002460/CsaV3_2G001620/CsaV3_2G006800/CsaV3_2G010800/CsaV3_2G013510/CsaV3_2G019510/CsaV3_2G032570/CsaV3_2G034130/CsaV3_3G002360/CsaV3_3G004770/CsaV3_3G011000/CsaV3_3G012600/CsaV3_3G015690/CsaV3_3G016100/CsaV3_3G017240/CsaV3_3G020570/CsaV3_3G022680/CsaV3_3G032360/CsaV3_3G032940/CsaV3_3G042510/CsaV3_4G004050/CsaV3_4G004440/CsaV3_4G008470/CsaV3_4G010560/CsaV3_4G023230/CsaV3_4G030970/CsaV3_4G0…	55
CC	GO:1990904	ribonucleoprotein complex	47/189	224/2213	5.81973e-10	1.32399e-08	CsaV3_1G002460/CsaV3_2G001620/CsaV3_2G002010/CsaV3_2G013510/CsaV3_2G019510/CsaV3_2G032570/CsaV3_2G034130/CsaV3_3G002360/CsaV3_3G004770/CsaV3_3G011000/CsaV3_3G012600/CsaV3_3G015480/CsaV3_3G015690/CsaV3_3G017240/CsaV3_3G020570/CsaV3_3G022680/CsaV3_3G032360/CsaV3_3G032940/CsaV3_3G042510/CsaV3_4G004050/CsaV3_4G004440/CsaV3_4G008470/CsaV3_4G023230/CsaV3_4G030970/CsaV3_4G032830/CsaV3_4G033460/CsaV3_5G0…	CsaV3_1G002460/CsaV3_2G001620/CsaV3_2G002010/CsaV3_2G013510/CsaV3_2G019510/CsaV3_2G032570/CsaV3_2G034130/CsaV3_3G002360/CsaV3_3G004770/CsaV3_3G011000/CsaV3_3G012600/CsaV3_3G015480/CsaV3_3G015690/CsaV3_3G017240/CsaV3_3G020570/CsaV3_3G022680/CsaV3_3G032360/CsaV3_3G032940/CsaV3_3G042510/CsaV3_4G004050/CsaV3_4G004440/CsaV3_4G008470/CsaV3_4G023230/CsaV3_4G030970/CsaV3_4G032830/CsaV3_4G033460/CsaV3_5G0…	47
CC	GO:0044444	cytoplasmic part	68/189	421/2213	6.4309e-09	1.17042e-07	CsaV3_1G002460/CsaV3_1G003090/CsaV3_1G009630/CsaV3_1G035920/CsaV3_2G001620/CsaV3_2G013510/CsaV3_2G019510/CsaV3_2G024700/CsaV3_2G032570/CsaV3_2G034130/CsaV3_3G002360/CsaV3_3G004770/CsaV3_3G011000/CsaV3_3G012600/CsaV3_3G015480/CsaV3_3G015690/CsaV3_3G017240/CsaV3_3G019240/CsaV3_3G020570/CsaV3_3G022680/CsaV3_3G030800/CsaV3_3G032360/CsaV3_3G032940/CsaV3_3G042510/CsaV3_4G001330/CsaV3_4G004050/CsaV3_4G0…	CsaV3_1G002460/CsaV3_1G003090/CsaV3_1G009630/CsaV3_1G035920/CsaV3_2G001620/CsaV3_2G013510/CsaV3_2G019510/CsaV3_2G024700/CsaV3_2G032570/CsaV3_2G034130/CsaV3_3G002360/CsaV3_3G004770/CsaV3_3G011000/CsaV3_3G012600/CsaV3_3G015480/CsaV3_3G015690/CsaV3_3G017240/CsaV3_3G019240/CsaV3_3G020570/CsaV3_3G022680/CsaV3_3G030800/CsaV3_3G032360/CsaV3_3G032940/CsaV3_3G042510/CsaV3_4G001330/CsaV3_4G004050/CsaV3_4G0…	68
CC	GO:0005737	cytoplasm	75/189	497/2213	1.76946e-08	2.68368e-07	CsaV3_1G002460/CsaV3_1G003090/CsaV3_1G009630/CsaV3_1G035920/CsaV3_1G038230/CsaV3_2G001620/CsaV3_2G013510/CsaV3_2G014210/CsaV3_2G019510/CsaV3_2G024700/CsaV3_2G032570/CsaV3_2G034130/CsaV3_3G002020/CsaV3_3G002360/CsaV3_3G004770/CsaV3_3G011000/CsaV3_3G012600/CsaV3_3G015480/CsaV3_3G015690/CsaV3_3G017240/CsaV3_3G019240/CsaV3_3G020570/CsaV3_3G022680/CsaV3_3G023420/CsaV3_3G030800/CsaV3_3G032360/CsaV3_3G0…	CsaV3_1G002460/CsaV3_1G003090/CsaV3_1G009630/CsaV3_1G035920/CsaV3_1G038230/CsaV3_2G001620/CsaV3_2G013510/CsaV3_2G014210/CsaV3_2G019510/CsaV3_2G024700/CsaV3_2G032570/CsaV3_2G034130/CsaV3_3G002020/CsaV3_3G002360/CsaV3_3G004770/CsaV3_3G011000/CsaV3_3G012600/CsaV3_3G015480/CsaV3_3G015690/CsaV3_3G017240/CsaV3_3G019240/CsaV3_3G020570/CsaV3_3G022680/CsaV3_3G023420/CsaV3_3G030800/CsaV3_3G032360/CsaV3_3G0…	75
CC	GO:0005743	mitochondrial inner membrane	5/189	114657	0.00207661	0.0269959	CsaV3_2G024700/CsaV3_5G034810/CsaV3_5G036470/CsaV3_6G004490/CsaV3_UNG052430	CsaV3_2G024700/CsaV3_5G034810/CsaV3_5G036470/CsaV3_6G004490/CsaV3_UNG052430	5
CC	GO:0019866	organelle inner membrane	5/189	13/2213	0.0031432	0.0357539	CsaV3_2G024700/CsaV3_5G034810/CsaV3_5G036470/CsaV3_6G004490/CsaV3_UNG052430	CsaV3_2G024700/CsaV3_5G034810/CsaV3_5G036470/CsaV3_6G004490/CsaV3_UNG052430	5
CC	GO:0005740	mitochondrial envelope	7/189	25/2213	0.00377295	0.0381487	CsaV3_2G024700/CsaV3_4G001330/CsaV3_5G034810/CsaV3_5G036470/CsaV3_6G004490/CsaV3_6G036180/CsaV3_UNG052430	CsaV3_2G024700/CsaV3_4G001330/CsaV3_5G034810/CsaV3_5G036470/CsaV3_6G004490/CsaV3_6G036180/CsaV3_UNG052430	7
CC	GO:0098798	mitochondrial protein complex	4/189	114596	0.0071779	0.0653189	CsaV3_5G034810/CsaV3_5G036470/CsaV3_6G004490/CsaV3_UNG052430	CsaV3_5G034810/CsaV3_5G036470/CsaV3_6G004490/CsaV3_UNG052430	4
CC	GO:0031966	mitochondrial membrane	6/189	22/2213	0.00837206	0.0692597	CsaV3_2G024700/CsaV3_5G034810/CsaV3_5G036470/CsaV3_6G004490/CsaV3_6G036180/CsaV3_UNG052430	CsaV3_2G024700/CsaV3_5G034810/CsaV3_5G036470/CsaV3_6G004490/CsaV3_6G036180/CsaV3_UNG052430	6
CC	GO:0000228	nuclear chromosome	4/189	114627	0.0105363	0.0775217	CsaV3_2G006800/CsaV3_2G010800/CsaV3_4G010560/CsaV3_6G001130	CsaV3_2G006800/CsaV3_2G010800/CsaV3_4G010560/CsaV3_6G001130	4
CC	GO:0044429	mitochondrial part	7/189	30/2213	0.0110745	0.0775217	CsaV3_2G024700/CsaV3_4G001330/CsaV3_5G034810/CsaV3_5G036470/CsaV3_6G004490/CsaV3_6G036180/CsaV3_UNG052430	CsaV3_2G024700/CsaV3_4G001330/CsaV3_5G034810/CsaV3_5G036470/CsaV3_6G004490/CsaV3_6G036180/CsaV3_UNG052430	7
CC	GO:0045259	proton-transporting ATP synthase complex	4/189	114657	0.0147661	0.09598	CsaV3_3G010470/CsaV3_5G034810/CsaV3_5G036470/CsaV3_UNG052430	CsaV3_3G010470/CsaV3_5G034810/CsaV3_5G036470/CsaV3_UNG052430	4
CC	GO:0031967	organelle envelope	7/189	34/2213	0.0218658	0.124362	CsaV3_2G024700/CsaV3_4G001330/CsaV3_5G034810/CsaV3_5G036470/CsaV3_6G004490/CsaV3_6G036180/CsaV3_UNG052430	CsaV3_2G024700/CsaV3_4G001330/CsaV3_5G034810/CsaV3_5G036470/CsaV3_6G004490/CsaV3_6G036180/CsaV3_UNG052430	7
CC	GO:0031975	envelope	7/189	34/2213	0.0218658	0.124362	CsaV3_2G024700/CsaV3_4G001330/CsaV3_5G034810/CsaV3_5G036470/CsaV3_6G004490/CsaV3_6G036180/CsaV3_UNG052430	CsaV3_2G024700/CsaV3_4G001330/CsaV3_5G034810/CsaV3_5G036470/CsaV3_6G004490/CsaV3_6G036180/CsaV3_UNG052430	7
CC	GO:0005694	chromosome	8/189	44/2213	0.0296844	0.158899	CsaV3_2G006800/CsaV3_2G010800/CsaV3_3G016100/CsaV3_4G010560/CsaV3_4G036380/CsaV3_5G027630/CsaV3_6G001130/CsaV3_6G035790	CsaV3_2G006800/CsaV3_2G010800/CsaV3_3G016100/CsaV3_4G010560/CsaV3_4G036380/CsaV3_5G027630/CsaV3_6G001130/CsaV3_6G035790	8
CC	GO:0031090	organelle membrane	8/189	52/2213	0.0703261	0.355538	CsaV3_2G024700/CsaV3_5G034810/CsaV3_5G036470/CsaV3_6G001890/CsaV3_6G003980/CsaV3_6G004490/CsaV3_6G036180/CsaV3_UNG052430	CsaV3_2G024700/CsaV3_5G034810/CsaV3_5G036470/CsaV3_6G001890/CsaV3_6G003980/CsaV3_6G004490/CsaV3_6G036180/CsaV3_UNG052430	8
CC	GO:0019867	outer membrane	3/189	114657	0.0758942	0.363494	CsaV3_1G034510/CsaV3_4G024160/CsaV3_6G036180	CsaV3_1G034510/CsaV3_4G024160/CsaV3_6G036180	3
CC	GO:0005739	mitochondrion	11/189	86/2213	0.1107	0.503686	CsaV3_2G024700/CsaV3_4G001330/CsaV3_4G030480/CsaV3_5G030060/CsaV3_5G032850/CsaV3_5G034810/CsaV3_5G036470/CsaV3_6G004490/CsaV3_6G016530/CsaV3_6G036180/CsaV3_UNG052430	CsaV3_2G024700/CsaV3_4G001330/CsaV3_4G030480/CsaV3_5G030060/CsaV3_5G032850/CsaV3_5G034810/CsaV3_5G036470/CsaV3_6G004490/CsaV3_6G016530/CsaV3_6G036180/CsaV3_UNG052430	11
CC	GO:0000148	1,3-beta-D-glucan synthase complex	2/189	114596	0.207846	0.859732	CsaV3_2G018300/CsaV3_7G031450	CsaV3_2G018300/CsaV3_7G031450	2
CC	GO:0044459	plasma membrane part	3/189	19/2213	0.217295	0.859732	CsaV3_2G018300/CsaV3_6G001890/CsaV3_7G031450	CsaV3_2G018300/CsaV3_6G001890/CsaV3_7G031450	3
CC	GO:0098797	plasma membrane protein complex	3/189	19/2213	0.217295	0.859732	CsaV3_2G018300/CsaV3_6G001890/CsaV3_7G031450	CsaV3_2G018300/CsaV3_6G001890/CsaV3_7G031450	3
CC	GO:0016469	proton-transporting two-sector ATPase complex	4/189	29/2213	0.231327	0.876193	CsaV3_3G010470/CsaV3_5G034810/CsaV3_5G036470/CsaV3_UNG052430	CsaV3_3G010470/CsaV3_5G034810/CsaV3_5G036470/CsaV3_UNG052430	4
CC	GO:0005886	plasma membrane	3/189	20/2213	0.240712	0.876193	CsaV3_2G018300/CsaV3_6G001890/CsaV3_7G031450	CsaV3_2G018300/CsaV3_6G001890/CsaV3_7G031450	3
CC	GO:0000145	exocyst	3/189	22/2213	0.288611	0.905642	CsaV3_1G009630/CsaV3_3G030800/CsaV3_7G033810	CsaV3_1G009630/CsaV3_3G030800/CsaV3_7G033810	3
CC	GO:0005938	cell cortex	3/189	22/2213	0.288611	0.905642	CsaV3_1G009630/CsaV3_3G030800/CsaV3_7G033810	CsaV3_1G009630/CsaV3_3G030800/CsaV3_7G033810	3
CC	GO:0044448	cell cortex part	3/189	22/2213	0.288611	0.905642	CsaV3_1G009630/CsaV3_3G030800/CsaV3_7G033810	CsaV3_1G009630/CsaV3_3G030800/CsaV3_7G033810	3
CC	GO:0099568	cytoplasmic region	3/189	22/2213	0.288611	0.905642	CsaV3_1G009630/CsaV3_3G030800/CsaV3_7G033810	CsaV3_1G009630/CsaV3_3G030800/CsaV3_7G033810	3
CC	GO:0044427	chromosomal part	3/189	23/2213	0.312857	0.913945	CsaV3_2G006800/CsaV3_2G010800/CsaV3_4G036380	CsaV3_2G006800/CsaV3_2G010800/CsaV3_4G036380	3
CC	GO:0099023	tethering complex	3/189	24/2213	0.337156	0.913945	CsaV3_1G009630/CsaV3_3G030800/CsaV3_7G033810	CsaV3_1G009630/CsaV3_3G030800/CsaV3_7G033810	3
CC	GO:0033177	proton-transporting two-sector ATPase complex, proton-transporting domain	2/189	14/2213	0.338962	0.913945	CsaV3_5G036470/CsaV3_UNG052430	CsaV3_5G036470/CsaV3_UNG052430	2
CC	GO:0031981	nuclear lumen	5/189	46/2213	0.356105	0.913945	CsaV3_2G006800/CsaV3_2G010800/CsaV3_4G010560/CsaV3_6G001130/CsaV3_7G005510	CsaV3_2G006800/CsaV3_2G010800/CsaV3_4G010560/CsaV3_6G001130/CsaV3_7G005510	5
CC	GO:0033178	proton-transporting two-sector ATPase complex, catalytic domain	2/189	15/2213	0.371072	0.913945	CsaV3_3G010470/CsaV3_5G034810	CsaV3_3G010470/CsaV3_5G034810	2
CC	GO:0009654	photosystem II oxygen evolving complex	2/189	16/2213	0.402549	0.913945	CsaV3_1G015710/CsaV3_2G031600	CsaV3_1G015710/CsaV3_2G031600	2
CC	GO:0015630	microtubule cytoskeleton	2/189	16/2213	0.402549	0.913945	CsaV3_4G031280/CsaV3_4G036380	CsaV3_4G031280/CsaV3_4G036380	2
CC	GO:0030117	membrane coat	3/189	28/2213	0.433074	0.913945	CsaV3_6G001890/CsaV3_6G014610/CsaV3_7G003330	CsaV3_6G001890/CsaV3_6G014610/CsaV3_7G003330	3
CC	GO:0048475	coated membrane	3/189	28/2213	0.433074	0.913945	CsaV3_6G001890/CsaV3_6G014610/CsaV3_7G003330	CsaV3_6G001890/CsaV3_6G014610/CsaV3_7G003330	3
CC	GO:0042651	thylakoid membrane	2/189	17/2213	0.433266	0.913945	CsaV3_1G015710/CsaV3_2G031600	CsaV3_1G015710/CsaV3_2G031600	2
CC	GO:1990204	oxidoreductase complex	2/189	17/2213	0.433266	0.913945	CsaV3_1G015710/CsaV3_2G031600	CsaV3_1G015710/CsaV3_2G031600	2
CC	GO:0098796	membrane protein complex	12/189	132/2213	0.455439	0.913945	CsaV3_1G015710/CsaV3_2G018300/CsaV3_2G031600/CsaV3_3G010470/CsaV3_5G034810/CsaV3_5G036470/CsaV3_6G001890/CsaV3_6G004490/CsaV3_6G014610/CsaV3_7G003330/CsaV3_7G031450/CsaV3_UNG052430	CsaV3_1G015710/CsaV3_2G018300/CsaV3_2G031600/CsaV3_3G010470/CsaV3_5G034810/CsaV3_5G036470/CsaV3_6G001890/CsaV3_6G004490/CsaV3_6G014610/CsaV3_7G003330/CsaV3_7G031450/CsaV3_UNG052430	12
CC	GO:0031974	membrane-enclosed lumen	5/189	52/2213	0.461237	0.913945	CsaV3_2G006800/CsaV3_2G010800/CsaV3_4G010560/CsaV3_6G001130/CsaV3_7G005510	CsaV3_2G006800/CsaV3_2G010800/CsaV3_4G010560/CsaV3_6G001130/CsaV3_7G005510	5
CC	GO:0043233	organelle lumen	5/189	52/2213	0.461237	0.913945	CsaV3_2G006800/CsaV3_2G010800/CsaV3_4G010560/CsaV3_6G001130/CsaV3_7G005510	CsaV3_2G006800/CsaV3_2G010800/CsaV3_4G010560/CsaV3_6G001130/CsaV3_7G005510	5
CC	GO:0070013	intracellular organelle lumen	5/189	52/2213	0.461237	0.913945	CsaV3_2G006800/CsaV3_2G010800/CsaV3_4G010560/CsaV3_6G001130/CsaV3_7G005510	CsaV3_2G006800/CsaV3_2G010800/CsaV3_4G010560/CsaV3_6G001130/CsaV3_7G005510	5
CC	GO:0044422	organelle part	18/189	202/2213	0.461994	0.913945	CsaV3_2G002010/CsaV3_2G006800/CsaV3_2G010800/CsaV3_2G024700/CsaV3_4G001330/CsaV3_4G010560/CsaV3_4G031280/CsaV3_4G036380/CsaV3_5G032980/CsaV3_5G034810/CsaV3_5G036470/CsaV3_6G001130/CsaV3_6G001890/CsaV3_6G003980/CsaV3_6G004490/CsaV3_6G036180/CsaV3_7G005510/CsaV3_UNG052430	CsaV3_2G002010/CsaV3_2G006800/CsaV3_2G010800/CsaV3_2G024700/CsaV3_4G001330/CsaV3_4G010560/CsaV3_4G031280/CsaV3_4G036380/CsaV3_5G032980/CsaV3_5G034810/CsaV3_5G036470/CsaV3_6G001130/CsaV3_6G001890/CsaV3_6G003980/CsaV3_6G004490/CsaV3_6G036180/CsaV3_7G005510/CsaV3_UNG052430	18
CC	GO:0044446	intracellular organelle part	18/189	202/2213	0.461994	0.913945	CsaV3_2G002010/CsaV3_2G006800/CsaV3_2G010800/CsaV3_2G024700/CsaV3_4G001330/CsaV3_4G010560/CsaV3_4G031280/CsaV3_4G036380/CsaV3_5G032980/CsaV3_5G034810/CsaV3_5G036470/CsaV3_6G001130/CsaV3_6G001890/CsaV3_6G003980/CsaV3_6G004490/CsaV3_6G036180/CsaV3_7G005510/CsaV3_UNG052430	CsaV3_2G002010/CsaV3_2G006800/CsaV3_2G010800/CsaV3_2G024700/CsaV3_4G001330/CsaV3_4G010560/CsaV3_4G031280/CsaV3_4G036380/CsaV3_5G032980/CsaV3_5G034810/CsaV3_5G036470/CsaV3_6G001130/CsaV3_6G001890/CsaV3_6G003980/CsaV3_6G004490/CsaV3_6G036180/CsaV3_7G005510/CsaV3_UNG052430	18
CC	GO:0071944	cell periphery	10/189	112/2213	0.491592	0.946416	CsaV3_1G009630/CsaV3_2G018180/CsaV3_2G018190/CsaV3_2G018300/CsaV3_3G030800/CsaV3_3G036070/CsaV3_6G001890/CsaV3_6G049200/CsaV3_7G031450/CsaV3_7G033810	CsaV3_1G009630/CsaV3_2G018180/CsaV3_2G018190/CsaV3_2G018300/CsaV3_3G030800/CsaV3_3G036070/CsaV3_6G001890/CsaV3_6G049200/CsaV3_7G031450/CsaV3_7G033810	10
CC	GO:0005856	cytoskeleton	3/189	31/2213	0.501645	0.946416	CsaV3_4G031280/CsaV3_4G036380/CsaV3_UNG147160	CsaV3_4G031280/CsaV3_4G036380/CsaV3_UNG147160	3
CC	GO:0019898	extrinsic component of membrane	2/189	20/2213	0.519971	0.946416	CsaV3_1G015710/CsaV3_2G031600	CsaV3_1G015710/CsaV3_2G031600	2
CC	GO:0005634	nucleus	32/189	374/2213	0.528292	0.946416	CsaV3_1G002970/CsaV3_1G003380/CsaV3_1G004910/CsaV3_1G006430/CsaV3_2G002010/CsaV3_2G006800/CsaV3_2G010800/CsaV3_2G012400/CsaV3_2G016060/CsaV3_2G026360/CsaV3_2G031270/CsaV3_3G010690/CsaV3_3G038950/CsaV3_3G040420/CsaV3_4G010090/CsaV3_4G010560/CsaV3_4G012030/CsaV3_5G003340/CsaV3_5G028660/CsaV3_5G034290/CsaV3_5G035370/CsaV3_6G001130/CsaV3_6G007420/CsaV3_6G031940/CsaV3_6G032190/CsaV3_6G044070/CsaV3_6G0…	CsaV3_1G002970/CsaV3_1G003380/CsaV3_1G004910/CsaV3_1G006430/CsaV3_2G002010/CsaV3_2G006800/CsaV3_2G010800/CsaV3_2G012400/CsaV3_2G016060/CsaV3_2G026360/CsaV3_2G031270/CsaV3_3G010690/CsaV3_3G038950/CsaV3_3G040420/CsaV3_4G010090/CsaV3_4G010560/CsaV3_4G012030/CsaV3_5G003340/CsaV3_5G028660/CsaV3_5G034290/CsaV3_5G035370/CsaV3_6G001130/CsaV3_6G007420/CsaV3_6G031940/CsaV3_6G032190/CsaV3_6G044070/CsaV3_6G0…	32
CC	GO:0044428	nuclear part	6/189	69/2213	0.545699	0.946416	CsaV3_2G002010/CsaV3_2G006800/CsaV3_2G010800/CsaV3_4G010560/CsaV3_6G001130/CsaV3_7G005510	CsaV3_2G002010/CsaV3_2G006800/CsaV3_2G010800/CsaV3_4G010560/CsaV3_6G001130/CsaV3_7G005510	6
CC	GO:0005794	Golgi apparatus	2/189	22/2213	0.572685	0.946416	CsaV3_6G001890/CsaV3_6G003980	CsaV3_6G001890/CsaV3_6G003980	2
CC	GO:0044431	Golgi apparatus part	2/189	22/2213	0.572685	0.946416	CsaV3_6G001890/CsaV3_6G003980	CsaV3_6G001890/CsaV3_6G003980	2
CC	GO:0030133	transport vesicle	1/189	114596	0.591244	0.946416	CsaV3_6G001890	CsaV3_6G001890	1
CC	GO:0030658	transport vesicle membrane	1/189	114596	0.591244	0.946416	CsaV3_6G001890	CsaV3_6G001890	1
CC	GO:0032993	protein-DNA complex	1/189	114596	0.591244	0.946416	CsaV3_2G006800	CsaV3_2G006800	1
CC	GO:0098588	bounding membrane of organelle	3/189	38/2213	0.64305	0.946416	CsaV3_6G001890/CsaV3_6G003980/CsaV3_6G036180	CsaV3_6G001890/CsaV3_6G003980/CsaV3_6G036180	3
CC	GO:0009523	photosystem II	2/189	25/2213	0.643673	0.946416	CsaV3_1G015710/CsaV3_2G031600	CsaV3_1G015710/CsaV3_2G031600	2
CC	GO:1902494	catalytic complex	8/189	102/2213	0.655762	0.946416	CsaV3_1G003090/CsaV3_1G015710/CsaV3_1G035920/CsaV3_2G018300/CsaV3_2G031600/CsaV3_4G032560/CsaV3_5G036760/CsaV3_7G031450	CsaV3_1G003090/CsaV3_1G015710/CsaV3_1G035920/CsaV3_2G018300/CsaV3_2G031600/CsaV3_4G032560/CsaV3_5G036760/CsaV3_7G031450	8
CC	GO:0016592	mediator complex	1/189	114657	0.658386	0.946416	CsaV3_7G005510	CsaV3_7G005510	1
CC	GO:0044430	cytoskeletal part	2/189	29/2213	0.723495	0.946416	CsaV3_4G031280/CsaV3_4G036380	CsaV3_4G031280/CsaV3_4G036380	2
CC	GO:0098805	whole membrane	2/189	31/2213	0.757446	0.946416	CsaV3_6G001890/CsaV3_6G036180	CsaV3_6G001890/CsaV3_6G036180	2
CC	GO:0005798	Golgi-associated vesicle	1/189	17/2213	0.782034	0.946416	CsaV3_6G001890	CsaV3_6G001890	1
CC	GO:0005839	proteasome core complex	1/189	17/2213	0.782034	0.946416	CsaV3_4G032560	CsaV3_4G032560	1
CC	GO:0012506	vesicle membrane	1/189	17/2213	0.782034	0.946416	CsaV3_6G001890	CsaV3_6G001890	1
CC	GO:0030120	vesicle coat	1/189	17/2213	0.782034	0.946416	CsaV3_6G001890	CsaV3_6G001890	1
CC	GO:0030135	coated vesicle	1/189	17/2213	0.782034	0.946416	CsaV3_6G001890	CsaV3_6G001890	1
CC	GO:0030659	cytoplasmic vesicle membrane	1/189	17/2213	0.782034	0.946416	CsaV3_6G001890	CsaV3_6G001890	1
CC	GO:0030660	Golgi-associated vesicle membrane	1/189	17/2213	0.782034	0.946416	CsaV3_6G001890	CsaV3_6G001890	1
CC	GO:0030662	coated vesicle membrane	1/189	17/2213	0.782034	0.946416	CsaV3_6G001890	CsaV3_6G001890	1
CC	GO:0031410	cytoplasmic vesicle	1/189	17/2213	0.782034	0.946416	CsaV3_6G001890	CsaV3_6G001890	1
CC	GO:0031982	vesicle	1/189	17/2213	0.782034	0.946416	CsaV3_6G001890	CsaV3_6G001890	1
CC	GO:0044433	cytoplasmic vesicle part	1/189	17/2213	0.782034	0.946416	CsaV3_6G001890	CsaV3_6G001890	1
CC	GO:0097708	intracellular vesicle	1/189	17/2213	0.782034	0.946416	CsaV3_6G001890	CsaV3_6G001890	1
CC	GO:0000502	proteasome complex	1/189	19/2213	0.817946	0.946416	CsaV3_4G032560	CsaV3_4G032560	1
CC	GO:1905369	endopeptidase complex	1/189	19/2213	0.817946	0.946416	CsaV3_4G032560	CsaV3_4G032560	1
CC	GO:1990234	transferase complex	2/189	39/2213	0.859607	0.946416	CsaV3_2G018300/CsaV3_7G031450	CsaV3_2G018300/CsaV3_7G031450	2
CC	GO:0005618	cell wall	4/189	70/2213	0.862796	0.946416	CsaV3_2G018180/CsaV3_2G018190/CsaV3_3G036070/CsaV3_6G049200	CsaV3_2G018180/CsaV3_2G018190/CsaV3_3G036070/CsaV3_6G049200	4
CC	GO:0030312	external encapsulating structure	4/189	70/2213	0.862796	0.946416	CsaV3_2G018180/CsaV3_2G018190/CsaV3_3G036070/CsaV3_6G049200	CsaV3_2G018180/CsaV3_2G018190/CsaV3_3G036070/CsaV3_6G049200	4
CC	GO:0009521	photosystem	2/189	40/2213	0.869171	0.946416	CsaV3_1G015710/CsaV3_2G031600	CsaV3_1G015710/CsaV3_2G031600	2
CC	GO:0048046	apoplast	1/189	23/2213	0.87306	0.946416	CsaV3_3G036070	CsaV3_3G036070	1
CC	GO:0009579	thylakoid	2/189	41/2213	0.878136	0.946416	CsaV3_1G015710/CsaV3_2G031600	CsaV3_1G015710/CsaV3_2G031600	2
CC	GO:0034357	photosynthetic membrane	2/189	41/2213	0.878136	0.946416	CsaV3_1G015710/CsaV3_2G031600	CsaV3_1G015710/CsaV3_2G031600	2
CC	GO:0044436	thylakoid part	2/189	41/2213	0.878136	0.946416	CsaV3_1G015710/CsaV3_2G031600	CsaV3_1G015710/CsaV3_2G031600	2
CC	GO:1905368	peptidase complex	1/189	24/2213	0.884015	0.946416	CsaV3_4G032560	CsaV3_4G032560	1
CC	GO:0031984	organelle subcompartment	1/189	28/2213	0.919197	0.969939	CsaV3_6G003980	CsaV3_6G003980	1
CC	GO:0005654	nucleoplasm	1/189	31/2213	0.938412	0.969939	CsaV3_7G005510	CsaV3_7G005510	1
CC	GO:0044451	nucleoplasm part	1/189	31/2213	0.938412	0.969939	CsaV3_7G005510	CsaV3_7G005510	1
CC	GO:0005783	endoplasmic reticulum	1/189	33/2213	0.948621	0.969939	CsaV3_7G029820	CsaV3_7G029820	1
CC	GO:0012505	endomembrane system	3/189	74/2213	0.959856	0.970521	CsaV3_6G001890/CsaV3_6G003980/CsaV3_7G029820	CsaV3_6G001890/CsaV3_6G003980/CsaV3_7G029820	3
CC	GO:0005576	extracellular region	1/189	47/2213	0.985623	0.985623	CsaV3_3G036070	CsaV3_3G036070	1
MF	GO:0003735	structural constituent of ribosome	45/738	201/9200	1.42966e-10	3.67422e-08	CsaV3_1G002460/CsaV3_2G001620/CsaV3_2G013510/CsaV3_2G019510/CsaV3_2G032570/CsaV3_2G034130/CsaV3_3G002360/CsaV3_3G004770/CsaV3_3G011000/CsaV3_3G011880/CsaV3_3G012600/CsaV3_3G015690/CsaV3_3G017240/CsaV3_3G020570/CsaV3_3G022680/CsaV3_3G032360/CsaV3_3G032940/CsaV3_3G042510/CsaV3_4G004050/CsaV3_4G004440/CsaV3_4G008470/CsaV3_4G023230/CsaV3_4G030970/CsaV3_4G032830/CsaV3_4G033460/CsaV3_5G001490/CsaV3_5G0…	CsaV3_1G002460/CsaV3_2G001620/CsaV3_2G013510/CsaV3_2G019510/CsaV3_2G032570/CsaV3_2G034130/CsaV3_3G002360/CsaV3_3G004770/CsaV3_3G011000/CsaV3_3G011880/CsaV3_3G012600/CsaV3_3G015690/CsaV3_3G017240/CsaV3_3G020570/CsaV3_3G022680/CsaV3_3G032360/CsaV3_3G032940/CsaV3_3G042510/CsaV3_4G004050/CsaV3_4G004440/CsaV3_4G008470/CsaV3_4G023230/CsaV3_4G030970/CsaV3_4G032830/CsaV3_4G033460/CsaV3_5G001490/CsaV3_5G0…	45
MF	GO:0005198	structural molecule activity	46/738	216/9200	5.20955e-10	6.69427e-08	CsaV3_1G002460/CsaV3_2G001620/CsaV3_2G013510/CsaV3_2G019510/CsaV3_2G032570/CsaV3_2G034130/CsaV3_3G002360/CsaV3_3G004770/CsaV3_3G011000/CsaV3_3G011880/CsaV3_3G012600/CsaV3_3G015690/CsaV3_3G017240/CsaV3_3G020570/CsaV3_3G022680/CsaV3_3G032360/CsaV3_3G032940/CsaV3_3G042510/CsaV3_4G004050/CsaV3_4G004440/CsaV3_4G008470/CsaV3_4G023230/CsaV3_4G030970/CsaV3_4G032830/CsaV3_4G033460/CsaV3_5G001490/CsaV3_5G0…	CsaV3_1G002460/CsaV3_2G001620/CsaV3_2G013510/CsaV3_2G019510/CsaV3_2G032570/CsaV3_2G034130/CsaV3_3G002360/CsaV3_3G004770/CsaV3_3G011000/CsaV3_3G011880/CsaV3_3G012600/CsaV3_3G015690/CsaV3_3G017240/CsaV3_3G020570/CsaV3_3G022680/CsaV3_3G032360/CsaV3_3G032940/CsaV3_3G042510/CsaV3_4G004050/CsaV3_4G004440/CsaV3_4G008470/CsaV3_4G023230/CsaV3_4G030970/CsaV3_4G032830/CsaV3_4G033460/CsaV3_5G001490/CsaV3_5G0…	46
MF	GO:0016779	nucleotidyltransferase activity	18/738	85/9200	0.000109993	0.00942277	CsaV3_1G001660/CsaV3_1G006150/CsaV3_2G010370/CsaV3_2G013070/CsaV3_2G014910/CsaV3_2G031090/CsaV3_3G003630/CsaV3_3G006740/CsaV3_3G021110/CsaV3_3G040420/CsaV3_3G045370/CsaV3_4G025970/CsaV3_4G036560/CsaV3_5G039570/CsaV3_6G008170/CsaV3_6G048110/CsaV3_7G002310/CsaV3_7G035430	CsaV3_1G001660/CsaV3_1G006150/CsaV3_2G010370/CsaV3_2G013070/CsaV3_2G014910/CsaV3_2G031090/CsaV3_3G003630/CsaV3_3G006740/CsaV3_3G021110/CsaV3_3G040420/CsaV3_3G045370/CsaV3_4G025970/CsaV3_4G036560/CsaV3_5G039570/CsaV3_6G008170/CsaV3_6G048110/CsaV3_7G002310/CsaV3_7G035430	18
MF	GO:0140098	catalytic activity, acting on RNA	24/738	148/9200	0.000669389	0.0430082	CsaV3_1G001660/CsaV3_1G038230/CsaV3_2G008510/CsaV3_2G010370/CsaV3_2G013070/CsaV3_3G002020/CsaV3_3G003630/CsaV3_3G007100/CsaV3_3G014650/CsaV3_3G036410/CsaV3_3G036550/CsaV3_3G040420/CsaV3_3G043900/CsaV3_4G003190/CsaV3_4G036560/CsaV3_5G026430/CsaV3_5G038060/CsaV3_5G039570/CsaV3_6G008170/CsaV3_6G043910/CsaV3_6G048110/CsaV3_6G048760/CsaV3_7G034980/CsaV3_7G035430	CsaV3_1G001660/CsaV3_1G038230/CsaV3_2G008510/CsaV3_2G010370/CsaV3_2G013070/CsaV3_3G002020/CsaV3_3G003630/CsaV3_3G007100/CsaV3_3G014650/CsaV3_3G036410/CsaV3_3G036550/CsaV3_3G040420/CsaV3_3G043900/CsaV3_4G003190/CsaV3_4G036560/CsaV3_5G026430/CsaV3_5G038060/CsaV3_5G039570/CsaV3_6G008170/CsaV3_6G043910/CsaV3_6G048110/CsaV3_6G048760/CsaV3_7G034980/CsaV3_7G035430	24
MF	GO:0004518	nuclease activity	13/738	62/9200	0.00106698	0.0534518	CsaV3_1G032850/CsaV3_2G031500/CsaV3_3G007100/CsaV3_3G036410/CsaV3_3G036550/CsaV3_3G040030/CsaV3_3G042180/CsaV3_3G043900/CsaV3_5G036480/CsaV3_5G038060/CsaV3_6G041210/CsaV3_6G042140/CsaV3_6G043910	CsaV3_1G032850/CsaV3_2G031500/CsaV3_3G007100/CsaV3_3G036410/CsaV3_3G036550/CsaV3_3G040030/CsaV3_3G042180/CsaV3_3G043900/CsaV3_5G036480/CsaV3_5G038060/CsaV3_6G041210/CsaV3_6G042140/CsaV3_6G043910	13
MF	GO:0046982	protein heterodimerization activity	13/738	63/9200	0.0012479	0.0534518	CsaV3_1G014090/CsaV3_1G014110/CsaV3_1G042610/CsaV3_2G006590/CsaV3_2G013770/CsaV3_6G003690/CsaV3_6G017050/CsaV3_6G017110/CsaV3_7G003000/CsaV3_7G025320/CsaV3_7G028390/CsaV3_7G028400/CsaV3_7G031310	CsaV3_1G014090/CsaV3_1G014110/CsaV3_1G042610/CsaV3_2G006590/CsaV3_2G013770/CsaV3_6G003690/CsaV3_6G017050/CsaV3_6G017110/CsaV3_7G003000/CsaV3_7G025320/CsaV3_7G028390/CsaV3_7G028400/CsaV3_7G031310	13
MF	GO:0016874	ligase activity	15/738	81/9200	0.00174225	0.0639655	CsaV3_1G038230/CsaV3_2G008510/CsaV3_2G034930/CsaV3_3G002020/CsaV3_3G009890/CsaV3_3G013600/CsaV3_3G014650/CsaV3_4G003190/CsaV3_4G011730/CsaV3_5G002770/CsaV3_5G023610/CsaV3_5G023920/CsaV3_5G026430/CsaV3_6G014300/CsaV3_6G048760	CsaV3_1G038230/CsaV3_2G008510/CsaV3_2G034930/CsaV3_3G002020/CsaV3_3G009890/CsaV3_3G013600/CsaV3_3G014650/CsaV3_4G003190/CsaV3_4G011730/CsaV3_5G002770/CsaV3_5G023610/CsaV3_5G023920/CsaV3_5G026430/CsaV3_6G014300/CsaV3_6G048760	15
MF	GO:0034062	5'-3' RNA polymerase activity	10/738	47/9200	0.00351402	0.0913838	CsaV3_1G001660/CsaV3_2G010370/CsaV3_2G013070/CsaV3_3G003630/CsaV3_3G040420/CsaV3_4G036560/CsaV3_5G039570/CsaV3_6G008170/CsaV3_6G048110/CsaV3_7G035430	CsaV3_1G001660/CsaV3_2G010370/CsaV3_2G013070/CsaV3_3G003630/CsaV3_3G040420/CsaV3_4G036560/CsaV3_5G039570/CsaV3_6G008170/CsaV3_6G048110/CsaV3_7G035430	10
MF	GO:0097747	RNA polymerase activity	10/738	47/9200	0.00351402	0.0913838	CsaV3_1G001660/CsaV3_2G010370/CsaV3_2G013070/CsaV3_3G003630/CsaV3_3G040420/CsaV3_4G036560/CsaV3_5G039570/CsaV3_6G008170/CsaV3_6G048110/CsaV3_7G035430	CsaV3_1G001660/CsaV3_2G010370/CsaV3_2G013070/CsaV3_3G003630/CsaV3_3G040420/CsaV3_4G036560/CsaV3_5G039570/CsaV3_6G008170/CsaV3_6G048110/CsaV3_7G035430	10
MF	GO:0016620	oxidoreductase activity, acting on the aldehyde or oxo group of donors, NAD or NADP as acceptor	5/738	14/9200	0.00355579	0.0913838	CsaV3_1G009410/CsaV3_2G014210/CsaV3_3G020110/CsaV3_4G037480/CsaV3_6G014940	CsaV3_1G009410/CsaV3_2G014210/CsaV3_3G020110/CsaV3_4G037480/CsaV3_6G014940	5
MF	GO:0003899	DNA-directed 5'-3' RNA polymerase activity	9/738	41/9200	0.00443595	0.10364	CsaV3_2G010370/CsaV3_2G013070/CsaV3_3G003630/CsaV3_3G040420/CsaV3_4G036560/CsaV3_5G039570/CsaV3_6G008170/CsaV3_6G048110/CsaV3_7G035430	CsaV3_2G010370/CsaV3_2G013070/CsaV3_3G003630/CsaV3_3G040420/CsaV3_4G036560/CsaV3_5G039570/CsaV3_6G008170/CsaV3_6G048110/CsaV3_7G035430	9
MF	GO:0016903	oxidoreductase activity, acting on the aldehyde or oxo group of donors	6/738	21/9200	0.00497299	0.106505	CsaV3_1G009410/CsaV3_2G014210/CsaV3_3G020110/CsaV3_4G037480/CsaV3_5G007980/CsaV3_6G014940	CsaV3_1G009410/CsaV3_2G014210/CsaV3_3G020110/CsaV3_4G037480/CsaV3_5G007980/CsaV3_6G014940	6
MF	GO:0004519	endonuclease activity	7/738	29/9200	0.00678889	0.134211	CsaV3_2G031500/CsaV3_3G007100/CsaV3_3G036410/CsaV3_3G036550/CsaV3_3G043900/CsaV3_5G038060/CsaV3_6G043910	CsaV3_2G031500/CsaV3_3G007100/CsaV3_3G036410/CsaV3_3G036550/CsaV3_3G043900/CsaV3_5G038060/CsaV3_6G043910	7
MF	GO:0008483	transaminase activity	4/738	2666577	0.00858017	0.147007	CsaV3_1G031330/CsaV3_4G004900/CsaV3_4G007380/CsaV3_7G007260	CsaV3_1G031330/CsaV3_4G004900/CsaV3_4G007380/CsaV3_7G007260	4
MF	GO:0016769	transferase activity, transferring nitrogenous groups	4/738	2666577	0.00858017	0.147007	CsaV3_1G031330/CsaV3_4G004900/CsaV3_4G007380/CsaV3_7G007260	CsaV3_1G031330/CsaV3_4G004900/CsaV3_4G007380/CsaV3_7G007260	4
MF	GO:0004521	endoribonuclease activity	6/738	24/9200	0.0100343	0.161176	CsaV3_3G007100/CsaV3_3G036410/CsaV3_3G036550/CsaV3_3G043900/CsaV3_5G038060/CsaV3_6G043910	CsaV3_3G007100/CsaV3_3G036410/CsaV3_3G036550/CsaV3_3G043900/CsaV3_5G038060/CsaV3_6G043910	6
MF	GO:0008094	DNA-dependent ATPase activity	5/738	19/9200	0.0147662	0.199974	CsaV3_4G012080/CsaV3_4G012090/CsaV3_4G037390/CsaV3_6G035790/CsaV3_7G033300	CsaV3_4G012080/CsaV3_4G012090/CsaV3_4G037390/CsaV3_6G035790/CsaV3_7G033300	5
MF	GO:0004003	ATP-dependent DNA helicase activity	4/738	13/9200	0.0163403	0.199974	CsaV3_4G012080/CsaV3_4G012090/CsaV3_4G037390/CsaV3_7G033300	CsaV3_4G012080/CsaV3_4G012090/CsaV3_4G037390/CsaV3_7G033300	4
MF	GO:0008026	ATP-dependent helicase activity	4/738	13/9200	0.0163403	0.199974	CsaV3_4G012080/CsaV3_4G012090/CsaV3_4G037390/CsaV3_7G033300	CsaV3_4G012080/CsaV3_4G012090/CsaV3_4G037390/CsaV3_7G033300	4
MF	GO:0019843	rRNA binding	4/738	13/9200	0.0163403	0.199974	CsaV3_3G004770/CsaV3_6G028440/CsaV3_6G046250/CsaV3_7G003660	CsaV3_3G004770/CsaV3_6G028440/CsaV3_6G046250/CsaV3_7G003660	4
MF	GO:0070035	purine NTP-dependent helicase activity	4/738	13/9200	0.0163403	0.199974	CsaV3_4G012080/CsaV3_4G012090/CsaV3_4G037390/CsaV3_7G033300	CsaV3_4G012080/CsaV3_4G012090/CsaV3_4G037390/CsaV3_7G033300	4
MF	GO:0140097	catalytic activity, acting on DNA	8/738	43/9200	0.0193689	0.226264	CsaV3_1G006150/CsaV3_2G031090/CsaV3_4G012080/CsaV3_4G012090/CsaV3_4G037390/CsaV3_6G014300/CsaV3_6G035790/CsaV3_7G033300	CsaV3_1G006150/CsaV3_2G031090/CsaV3_4G012080/CsaV3_4G012090/CsaV3_4G037390/CsaV3_6G014300/CsaV3_6G035790/CsaV3_7G033300	8
MF	GO:0004540	ribonuclease activity	6/738	29/9200	0.0251722	0.263742	CsaV3_3G007100/CsaV3_3G036410/CsaV3_3G036550/CsaV3_3G043900/CsaV3_5G038060/CsaV3_6G043910	CsaV3_3G007100/CsaV3_3G036410/CsaV3_3G036550/CsaV3_3G043900/CsaV3_5G038060/CsaV3_6G043910	6
MF	GO:0004812	aminoacyl-tRNA ligase activity	7/738	37/9200	0.0256558	0.263742	CsaV3_1G038230/CsaV3_2G008510/CsaV3_3G002020/CsaV3_3G014650/CsaV3_4G003190/CsaV3_5G026430/CsaV3_6G048760	CsaV3_1G038230/CsaV3_2G008510/CsaV3_3G002020/CsaV3_3G014650/CsaV3_4G003190/CsaV3_5G026430/CsaV3_6G048760	7
MF	GO:0016875	ligase activity, forming carbon-oxygen bonds	7/738	37/9200	0.0256558	0.263742	CsaV3_1G038230/CsaV3_2G008510/CsaV3_3G002020/CsaV3_3G014650/CsaV3_4G003190/CsaV3_5G026430/CsaV3_6G048760	CsaV3_1G038230/CsaV3_2G008510/CsaV3_3G002020/CsaV3_3G014650/CsaV3_4G003190/CsaV3_5G026430/CsaV3_6G048760	7
MF	GO:0003678	DNA helicase activity	4/738	15/9200	0.0274425	0.271258	CsaV3_4G012080/CsaV3_4G012090/CsaV3_4G037390/CsaV3_7G033300	CsaV3_4G012080/CsaV3_4G012090/CsaV3_4G037390/CsaV3_7G033300	4
MF	GO:0016829	lyase activity	16/738	122/9200	0.0341669	0.325218	CsaV3_1G003090/CsaV3_1G004560/CsaV3_1G008730/CsaV3_1G035920/CsaV3_2G017980/CsaV3_2G028140/CsaV3_3G003680/CsaV3_3G041700/CsaV3_3G043270/CsaV3_4G008050/CsaV3_4G033150/CsaV3_5G017320/CsaV3_6G001800/CsaV3_6G005510/CsaV3_6G040430/CsaV3_6G042130	CsaV3_1G003090/CsaV3_1G004560/CsaV3_1G008730/CsaV3_1G035920/CsaV3_2G017980/CsaV3_2G028140/CsaV3_3G003680/CsaV3_3G041700/CsaV3_3G043270/CsaV3_4G008050/CsaV3_4G033150/CsaV3_5G017320/CsaV3_6G001800/CsaV3_6G005510/CsaV3_6G040430/CsaV3_6G042130	16
MF	GO:0030170	pyridoxal phosphate binding	9/738	58/9200	0.0401137	0.35549	CsaV3_1G031330/CsaV3_1G040170/CsaV3_4G004900/CsaV3_4G007380/CsaV3_4G009080/CsaV3_4G014580/CsaV3_5G017320/CsaV3_6G015190/CsaV3_7G007260	CsaV3_1G031330/CsaV3_1G040170/CsaV3_4G004900/CsaV3_4G007380/CsaV3_4G009080/CsaV3_4G014580/CsaV3_5G017320/CsaV3_6G015190/CsaV3_7G007260	9
MF	GO:0070279	vitamin B6 binding	9/738	58/9200	0.0401137	0.35549	CsaV3_1G031330/CsaV3_1G040170/CsaV3_4G004900/CsaV3_4G007380/CsaV3_4G009080/CsaV3_4G014580/CsaV3_5G017320/CsaV3_6G015190/CsaV3_7G007260	CsaV3_1G031330/CsaV3_1G040170/CsaV3_4G004900/CsaV3_4G007380/CsaV3_4G009080/CsaV3_4G014580/CsaV3_5G017320/CsaV3_6G015190/CsaV3_7G007260	9
MF	GO:0004525	ribonuclease III activity	3/738	2666577	0.0521478	0.394176	CsaV3_3G007100/CsaV3_3G043900/CsaV3_6G043910	CsaV3_3G007100/CsaV3_3G043900/CsaV3_6G043910	3
MF	GO:0016891	endoribonuclease activity, producing 5'-phosphomonoesters	3/738	2666577	0.0521478	0.394176	CsaV3_3G007100/CsaV3_3G043900/CsaV3_6G043910	CsaV3_3G007100/CsaV3_3G043900/CsaV3_6G043910	3
MF	GO:0016893	endonuclease activity, active with either ribo- or deoxyribonucleic acids and producing 5'-phosphomonoesters	3/738	2666577	0.0521478	0.394176	CsaV3_3G007100/CsaV3_3G043900/CsaV3_6G043910	CsaV3_3G007100/CsaV3_3G043900/CsaV3_6G043910	3
MF	GO:0030983	mismatched DNA binding	3/738	2666577	0.0521478	0.394176	CsaV3_2G002320/CsaV3_3G000200/CsaV3_7G029150	CsaV3_2G002320/CsaV3_3G000200/CsaV3_7G029150	3
MF	GO:0032296	double-stranded RNA-specific ribonuclease activity	3/738	2666577	0.0521478	0.394176	CsaV3_3G007100/CsaV3_3G043900/CsaV3_6G043910	CsaV3_3G007100/CsaV3_3G043900/CsaV3_6G043910	3
MF	GO:0016836	hydro-lyase activity	5/738	27/9200	0.0604623	0.443966	CsaV3_1G003090/CsaV3_1G035920/CsaV3_2G028140/CsaV3_3G043270/CsaV3_6G042130	CsaV3_1G003090/CsaV3_1G035920/CsaV3_2G028140/CsaV3_3G043270/CsaV3_6G042130	5
MF	GO:0033897	ribonuclease T2 activity	3/738	2666607	0.0655087	0.467659	CsaV3_3G036410/CsaV3_3G036550/CsaV3_5G038060	CsaV3_3G036410/CsaV3_3G036550/CsaV3_5G038060	3
MF	GO:0008017	microtubule binding	8/738	55/9200	0.0704384	0.489261	CsaV3_1G024160/CsaV3_1G033760/CsaV3_3G015910/CsaV3_4G005820/CsaV3_4G036380/CsaV3_6G034290/CsaV3_6G045040/CsaV3_UNG147160	CsaV3_1G024160/CsaV3_1G033760/CsaV3_3G015910/CsaV3_4G005820/CsaV3_4G036380/CsaV3_6G034290/CsaV3_6G045040/CsaV3_UNG147160	8
MF	GO:0004386	helicase activity	5/738	29/9200	0.0780836	0.503088	CsaV3_4G012080/CsaV3_4G012090/CsaV3_4G037390/CsaV3_7G027360/CsaV3_7G033300	CsaV3_4G012080/CsaV3_4G012090/CsaV3_4G037390/CsaV3_7G027360/CsaV3_7G033300	5
MF	GO:0005085	guanyl-nucleotide exchange factor activity	3/738	13/9200	0.0802592	0.503088	CsaV3_3G009610/CsaV3_3G010020/CsaV3_5G008330	CsaV3_3G009610/CsaV3_3G010020/CsaV3_5G008330	3
MF	GO:0016892	endoribonuclease activity, producing 3'-phosphomonoesters	3/738	13/9200	0.0802592	0.503088	CsaV3_3G036410/CsaV3_3G036550/CsaV3_5G038060	CsaV3_3G036410/CsaV3_3G036550/CsaV3_5G038060	3
MF	GO:0016894	endonuclease activity, active with either ribo- or deoxyribonucleic acids and producing 3'-phosphomonoesters	3/738	13/9200	0.0802592	0.503088	CsaV3_3G036410/CsaV3_3G036550/CsaV3_5G038060	CsaV3_3G036410/CsaV3_3G036550/CsaV3_5G038060	3
MF	GO:0003777	microtubule motor activity	7/738	48/9200	0.0864093	0.528317	CsaV3_1G024160/CsaV3_1G033760/CsaV3_3G015910/CsaV3_4G005820/CsaV3_6G034290/CsaV3_6G045040/CsaV3_UNG147160	CsaV3_1G024160/CsaV3_1G033760/CsaV3_3G015910/CsaV3_4G005820/CsaV3_6G034290/CsaV3_6G045040/CsaV3_UNG147160	7
MF	GO:0016835	carbon-oxygen lyase activity	8/738	58/9200	0.0901922	0.528317	CsaV3_1G003090/CsaV3_1G035920/CsaV3_2G017980/CsaV3_2G028140/CsaV3_3G003680/CsaV3_3G041700/CsaV3_3G043270/CsaV3_6G042130	CsaV3_1G003090/CsaV3_1G035920/CsaV3_2G017980/CsaV3_2G028140/CsaV3_3G003680/CsaV3_3G041700/CsaV3_3G043270/CsaV3_6G042130	8
MF	GO:0019783	ubiquitin-like protein-specific protease activity	4/738	22/9200	0.0945625	0.528317	CsaV3_1G002070/CsaV3_2G031540/CsaV3_3G001680/CsaV3_5G006240	CsaV3_1G002070/CsaV3_2G031540/CsaV3_3G001680/CsaV3_5G006240	4
MF	GO:0036459	thiol-dependent ubiquitinyl hydrolase activity	4/738	22/9200	0.0945625	0.528317	CsaV3_1G002070/CsaV3_2G031540/CsaV3_3G001680/CsaV3_5G006240	CsaV3_1G002070/CsaV3_2G031540/CsaV3_3G001680/CsaV3_5G006240	4
MF	GO:0101005	ubiquitinyl hydrolase activity	4/738	22/9200	0.0945625	0.528317	CsaV3_1G002070/CsaV3_2G031540/CsaV3_3G001680/CsaV3_5G006240	CsaV3_1G002070/CsaV3_2G031540/CsaV3_3G001680/CsaV3_5G006240	4
MF	GO:0003723	RNA binding	25/738	239/9200	0.102275	0.537268	CsaV3_1G029000/CsaV3_1G041590/CsaV3_1G043080/CsaV3_2G024410/CsaV3_3G002020/CsaV3_3G004770/CsaV3_3G007100/CsaV3_3G015480/CsaV3_3G019240/CsaV3_3G033100/CsaV3_3G036410/CsaV3_3G036550/CsaV3_3G043900/CsaV3_4G029850/CsaV3_4G033460/CsaV3_5G011010/CsaV3_5G027060/CsaV3_5G038060/CsaV3_6G028440/CsaV3_6G043910/CsaV3_6G046250/CsaV3_6G050190/CsaV3_7G003660/CsaV3_7G024080/CsaV3_UNG004080	CsaV3_1G029000/CsaV3_1G041590/CsaV3_1G043080/CsaV3_2G024410/CsaV3_3G002020/CsaV3_3G004770/CsaV3_3G007100/CsaV3_3G015480/CsaV3_3G019240/CsaV3_3G033100/CsaV3_3G036410/CsaV3_3G036550/CsaV3_3G043900/CsaV3_4G029850/CsaV3_4G033460/CsaV3_5G011010/CsaV3_5G027060/CsaV3_5G038060/CsaV3_6G028440/CsaV3_6G043910/CsaV3_6G046250/CsaV3_6G050190/CsaV3_7G003660/CsaV3_7G024080/CsaV3_UNG004080	25
MF	GO:0016853	isomerase activity	12/738	100/9200	0.103195	0.537268	CsaV3_2G024410/CsaV3_2G030420/CsaV3_3G037500/CsaV3_4G005770/CsaV3_5G010920/CsaV3_5G014110/CsaV3_5G026140/CsaV3_5G038940/CsaV3_6G035790/CsaV3_7G028080/CsaV3_7G030050/CsaV3_UNG004080	CsaV3_2G024410/CsaV3_2G030420/CsaV3_3G037500/CsaV3_4G005770/CsaV3_5G010920/CsaV3_5G014110/CsaV3_5G026140/CsaV3_5G038940/CsaV3_6G035790/CsaV3_7G028080/CsaV3_7G030050/CsaV3_UNG004080	12
MF	GO:0015631	tubulin binding	8/738	60/9200	0.104967	0.537268	CsaV3_1G024160/CsaV3_1G033760/CsaV3_3G015910/CsaV3_4G005820/CsaV3_4G036380/CsaV3_6G034290/CsaV3_6G045040/CsaV3_UNG147160	CsaV3_1G024160/CsaV3_1G033760/CsaV3_3G015910/CsaV3_4G005820/CsaV3_4G036380/CsaV3_6G034290/CsaV3_6G045040/CsaV3_UNG147160	8
MF	GO:0019842	vitamin binding	9/738	70/9200	0.105861	0.537268	CsaV3_1G031330/CsaV3_1G040170/CsaV3_4G004900/CsaV3_4G007380/CsaV3_4G009080/CsaV3_4G014580/CsaV3_5G017320/CsaV3_6G015190/CsaV3_7G007260	CsaV3_1G031330/CsaV3_1G040170/CsaV3_4G004900/CsaV3_4G007380/CsaV3_4G009080/CsaV3_4G014580/CsaV3_5G017320/CsaV3_6G015190/CsaV3_7G007260	9
MF	GO:0016830	carbon-carbon lyase activity	6/738	41/9200	0.106617	0.537268	CsaV3_4G008050/CsaV3_4G033150/CsaV3_5G017320/CsaV3_6G001800/CsaV3_6G005510/CsaV3_6G040430	CsaV3_4G008050/CsaV3_4G033150/CsaV3_5G017320/CsaV3_6G001800/CsaV3_6G005510/CsaV3_6G040430	6
MF	GO:0016788	hydrolase activity, acting on ester bonds	28/738	275/9200	0.112339	0.540226	CsaV3_1G004910/CsaV3_1G009790/CsaV3_1G032850/CsaV3_2G004960/CsaV3_2G010110/CsaV3_2G017640/CsaV3_2G018180/CsaV3_2G018190/CsaV3_2G031500/CsaV3_3G007100/CsaV3_3G020460/CsaV3_3G023420/CsaV3_3G036410/CsaV3_3G036550/CsaV3_3G040030/CsaV3_3G042180/CsaV3_3G043900/CsaV3_4G003190/CsaV3_4G025970/CsaV3_5G035770/CsaV3_5G036480/CsaV3_5G038060/CsaV3_6G006390/CsaV3_6G041210/CsaV3_6G042140/CsaV3_6G043910/CsaV3_6G0…	CsaV3_1G004910/CsaV3_1G009790/CsaV3_1G032850/CsaV3_2G004960/CsaV3_2G010110/CsaV3_2G017640/CsaV3_2G018180/CsaV3_2G018190/CsaV3_2G031500/CsaV3_3G007100/CsaV3_3G020460/CsaV3_3G023420/CsaV3_3G036410/CsaV3_3G036550/CsaV3_3G040030/CsaV3_3G042180/CsaV3_3G043900/CsaV3_4G003190/CsaV3_4G025970/CsaV3_5G035770/CsaV3_5G036480/CsaV3_5G038060/CsaV3_6G006390/CsaV3_6G041210/CsaV3_6G042140/CsaV3_6G043910/CsaV3_6G0…	28
MF	GO:0003682	chromatin binding	3/738	15/9200	0.113511	0.540226	CsaV3_1G042250/CsaV3_3G046180/CsaV3_5G013990	CsaV3_1G042250/CsaV3_3G046180/CsaV3_5G013990	3
MF	GO:0004721	phosphoprotein phosphatase activity	3/738	15/9200	0.113511	0.540226	CsaV3_1G004910/CsaV3_4G025970/CsaV3_5G035770	CsaV3_1G004910/CsaV3_4G025970/CsaV3_5G035770	3
MF	GO:0003774	motor activity	7/738	54/9200	0.138803	0.64859	CsaV3_1G024160/CsaV3_1G033760/CsaV3_3G015910/CsaV3_4G005820/CsaV3_6G034290/CsaV3_6G045040/CsaV3_UNG147160	CsaV3_1G024160/CsaV3_1G033760/CsaV3_3G015910/CsaV3_4G005820/CsaV3_6G034290/CsaV3_6G045040/CsaV3_UNG147160	7
MF	GO:0008092	cytoskeletal protein binding	10/738	86/9200	0.149571	0.686422	CsaV3_1G024160/CsaV3_1G033760/CsaV3_2G008570/CsaV3_3G015910/CsaV3_4G005820/CsaV3_4G036380/CsaV3_6G034290/CsaV3_6G045040/CsaV3_7G023520/CsaV3_UNG147160	CsaV3_1G024160/CsaV3_1G033760/CsaV3_2G008570/CsaV3_3G015910/CsaV3_4G005820/CsaV3_4G036380/CsaV3_6G034290/CsaV3_6G045040/CsaV3_7G023520/CsaV3_UNG147160	10
MF	GO:0042623	ATPase activity, coupled	8/738	68/9200	0.17615	0.757468	CsaV3_3G002090/CsaV3_3G010470/CsaV3_4G012080/CsaV3_4G012090/CsaV3_4G037390/CsaV3_5G030760/CsaV3_6G035790/CsaV3_7G033300	CsaV3_3G002090/CsaV3_3G010470/CsaV3_4G012080/CsaV3_4G012090/CsaV3_4G037390/CsaV3_5G030760/CsaV3_6G035790/CsaV3_7G033300	8
MF	GO:0016831	carboxy-lyase activity	4/738	28/9200	0.182957	0.757468	CsaV3_4G008050/CsaV3_4G033150/CsaV3_5G017320/CsaV3_6G005510	CsaV3_4G008050/CsaV3_4G033150/CsaV3_5G017320/CsaV3_6G005510	4
MF	GO:0051536	iron-sulfur cluster binding	6/738	48/9200	0.184024	0.757468	CsaV3_1G041780/CsaV3_1G042760/CsaV3_3G017880/CsaV3_3G039600/CsaV3_3G049310/CsaV3_6G037280	CsaV3_1G041780/CsaV3_1G042760/CsaV3_3G017880/CsaV3_3G039600/CsaV3_3G049310/CsaV3_6G037280	6
MF	GO:0051540	metal cluster binding	6/738	48/9200	0.184024	0.757468	CsaV3_1G041780/CsaV3_1G042760/CsaV3_3G017880/CsaV3_3G039600/CsaV3_3G049310/CsaV3_6G037280	CsaV3_1G041780/CsaV3_1G042760/CsaV3_3G017880/CsaV3_3G039600/CsaV3_3G049310/CsaV3_6G037280	6
MF	GO:0003843	1,3-beta-D-glucan synthase activity	2/738	2666546	0.18863	0.757468	CsaV3_2G018300/CsaV3_7G031450	CsaV3_2G018300/CsaV3_7G031450	2
MF	GO:0004177	aminopeptidase activity	2/738	2666546	0.18863	0.757468	CsaV3_1G000700/CsaV3_1G000710	CsaV3_1G000700/CsaV3_1G000710	2
MF	GO:0016679	oxidoreductase activity, acting on diphenols and related substances as donors	2/738	2666546	0.18863	0.757468	CsaV3_1G012000/CsaV3_1G012030	CsaV3_1G012000/CsaV3_1G012030	2
MF	GO:0034061	DNA polymerase activity	2/738	2666546	0.18863	0.757468	CsaV3_1G006150/CsaV3_2G031090	CsaV3_1G006150/CsaV3_2G031090	2
MF	GO:0000287	magnesium ion binding	7/738	59/9200	0.191785	0.758288	CsaV3_1G003090/CsaV3_1G035920/CsaV3_2G013320/CsaV3_2G017980/CsaV3_3G003680/CsaV3_3G021780/CsaV3_5G029840	CsaV3_1G003090/CsaV3_1G035920/CsaV3_2G013320/CsaV3_2G017980/CsaV3_3G003680/CsaV3_3G021780/CsaV3_5G029840	7
MF	GO:0016763	transferase activity, transferring pentosyl groups	2/738	2666577	0.21896	0.802512	CsaV3_2G030570/CsaV3_5G029840	CsaV3_2G030570/CsaV3_5G029840	2
MF	GO:0001883	purine nucleoside binding	15/738	150/9200	0.221706	0.802512	CsaV3_1G004280/CsaV3_2G002140/CsaV3_2G003560/CsaV3_2G026130/CsaV3_2G034580/CsaV3_3G042530/CsaV3_3G042540/CsaV3_4G008100/CsaV3_4G008510/CsaV3_5G003900/CsaV3_5G020040/CsaV3_5G036630/CsaV3_6G015750/CsaV3_6G050460/CsaV3_7G025160	CsaV3_1G004280/CsaV3_2G002140/CsaV3_2G003560/CsaV3_2G026130/CsaV3_2G034580/CsaV3_3G042530/CsaV3_3G042540/CsaV3_4G008100/CsaV3_4G008510/CsaV3_5G003900/CsaV3_5G020040/CsaV3_5G036630/CsaV3_6G015750/CsaV3_6G050460/CsaV3_7G025160	15
MF	GO:0005525	GTP binding	15/738	150/9200	0.221706	0.802512	CsaV3_1G004280/CsaV3_2G002140/CsaV3_2G003560/CsaV3_2G026130/CsaV3_2G034580/CsaV3_3G042530/CsaV3_3G042540/CsaV3_4G008100/CsaV3_4G008510/CsaV3_5G003900/CsaV3_5G020040/CsaV3_5G036630/CsaV3_6G015750/CsaV3_6G050460/CsaV3_7G025160	CsaV3_1G004280/CsaV3_2G002140/CsaV3_2G003560/CsaV3_2G026130/CsaV3_2G034580/CsaV3_3G042530/CsaV3_3G042540/CsaV3_4G008100/CsaV3_4G008510/CsaV3_5G003900/CsaV3_5G020040/CsaV3_5G036630/CsaV3_6G015750/CsaV3_6G050460/CsaV3_7G025160	15
MF	GO:0032549	ribonucleoside binding	15/738	150/9200	0.221706	0.802512	CsaV3_1G004280/CsaV3_2G002140/CsaV3_2G003560/CsaV3_2G026130/CsaV3_2G034580/CsaV3_3G042530/CsaV3_3G042540/CsaV3_4G008100/CsaV3_4G008510/CsaV3_5G003900/CsaV3_5G020040/CsaV3_5G036630/CsaV3_6G015750/CsaV3_6G050460/CsaV3_7G025160	CsaV3_1G004280/CsaV3_2G002140/CsaV3_2G003560/CsaV3_2G026130/CsaV3_2G034580/CsaV3_3G042530/CsaV3_3G042540/CsaV3_4G008100/CsaV3_4G008510/CsaV3_5G003900/CsaV3_5G020040/CsaV3_5G036630/CsaV3_6G015750/CsaV3_6G050460/CsaV3_7G025160	15
MF	GO:0032550	purine ribonucleoside binding	15/738	150/9200	0.221706	0.802512	CsaV3_1G004280/CsaV3_2G002140/CsaV3_2G003560/CsaV3_2G026130/CsaV3_2G034580/CsaV3_3G042530/CsaV3_3G042540/CsaV3_4G008100/CsaV3_4G008510/CsaV3_5G003900/CsaV3_5G020040/CsaV3_5G036630/CsaV3_6G015750/CsaV3_6G050460/CsaV3_7G025160	CsaV3_1G004280/CsaV3_2G002140/CsaV3_2G003560/CsaV3_2G026130/CsaV3_2G034580/CsaV3_3G042530/CsaV3_3G042540/CsaV3_4G008100/CsaV3_4G008510/CsaV3_5G003900/CsaV3_5G020040/CsaV3_5G036630/CsaV3_6G015750/CsaV3_6G050460/CsaV3_7G025160	15
MF	GO:0032561	guanyl ribonucleotide binding	15/738	150/9200	0.221706	0.802512	CsaV3_1G004280/CsaV3_2G002140/CsaV3_2G003560/CsaV3_2G026130/CsaV3_2G034580/CsaV3_3G042530/CsaV3_3G042540/CsaV3_4G008100/CsaV3_4G008510/CsaV3_5G003900/CsaV3_5G020040/CsaV3_5G036630/CsaV3_6G015750/CsaV3_6G050460/CsaV3_7G025160	CsaV3_1G004280/CsaV3_2G002140/CsaV3_2G003560/CsaV3_2G026130/CsaV3_2G034580/CsaV3_3G042530/CsaV3_3G042540/CsaV3_4G008100/CsaV3_4G008510/CsaV3_5G003900/CsaV3_5G020040/CsaV3_5G036630/CsaV3_6G015750/CsaV3_6G050460/CsaV3_7G025160	15
MF	GO:0140101	catalytic activity, acting on a tRNA	7/738	62/9200	0.226934	0.807232	CsaV3_1G038230/CsaV3_2G008510/CsaV3_3G002020/CsaV3_3G014650/CsaV3_4G003190/CsaV3_5G026430/CsaV3_6G048760	CsaV3_1G038230/CsaV3_2G008510/CsaV3_3G002020/CsaV3_3G014650/CsaV3_4G003190/CsaV3_5G026430/CsaV3_6G048760	7
MF	GO:0001882	nucleoside binding	15/738	151/9200	0.229292	0.807232	CsaV3_1G004280/CsaV3_2G002140/CsaV3_2G003560/CsaV3_2G026130/CsaV3_2G034580/CsaV3_3G042530/CsaV3_3G042540/CsaV3_4G008100/CsaV3_4G008510/CsaV3_5G003900/CsaV3_5G020040/CsaV3_5G036630/CsaV3_6G015750/CsaV3_6G050460/CsaV3_7G025160	CsaV3_1G004280/CsaV3_2G002140/CsaV3_2G003560/CsaV3_2G026130/CsaV3_2G034580/CsaV3_3G042530/CsaV3_3G042540/CsaV3_4G008100/CsaV3_4G008510/CsaV3_5G003900/CsaV3_5G020040/CsaV3_5G036630/CsaV3_6G015750/CsaV3_6G050460/CsaV3_7G025160	15
MF	GO:0051020	GTPase binding	3/738	21/9200	0.234856	0.81565	CsaV3_3G009610/CsaV3_3G010020/CsaV3_5G008330	CsaV3_3G009610/CsaV3_3G010020/CsaV3_5G008330	3
MF	GO:0017111	nucleoside-triphosphatase activity	22/738	233/9200	0.240835	0.825261	CsaV3_1G024160/CsaV3_1G033760/CsaV3_2G019440/CsaV3_3G002090/CsaV3_3G004580/CsaV3_3G008430/CsaV3_3G010470/CsaV3_3G015910/CsaV3_4G005820/CsaV3_4G012080/CsaV3_4G012090/CsaV3_4G037390/CsaV3_5G030760/CsaV3_5G034810/CsaV3_6G034290/CsaV3_6G035790/CsaV3_6G040670/CsaV3_6G045040/CsaV3_6G050460/CsaV3_7G027360/CsaV3_7G033300/CsaV3_UNG147160	CsaV3_1G024160/CsaV3_1G033760/CsaV3_2G019440/CsaV3_3G002090/CsaV3_3G004580/CsaV3_3G008430/CsaV3_3G010470/CsaV3_3G015910/CsaV3_4G005820/CsaV3_4G012080/CsaV3_4G012090/CsaV3_4G037390/CsaV3_5G030760/CsaV3_5G034810/CsaV3_6G034290/CsaV3_6G035790/CsaV3_6G040670/CsaV3_6G045040/CsaV3_6G050460/CsaV3_7G027360/CsaV3_7G033300/CsaV3_UNG147160	22
MF	GO:0016307	phosphatidylinositol phosphate kinase activity	2/738	2666607	0.24965	0.827057	CsaV3_4G029670/CsaV3_5G024510	CsaV3_4G029670/CsaV3_5G024510	2
MF	GO:0016645	oxidoreductase activity, acting on the CH-NH group of donors	2/738	2666607	0.24965	0.827057	CsaV3_3G009100/CsaV3_4G027750	CsaV3_3G009100/CsaV3_4G027750	2
MF	GO:0016866	intramolecular transferase activity	4/738	32/9200	0.25248	0.827057	CsaV3_2G024410/CsaV3_5G014110/CsaV3_5G038940/CsaV3_UNG004080	CsaV3_2G024410/CsaV3_5G014110/CsaV3_5G038940/CsaV3_UNG004080	4
MF	GO:0008171	O-methyltransferase activity	3/738	22/9200	0.257008	0.827057	CsaV3_2G034540/CsaV3_6G013080/CsaV3_7G003180	CsaV3_2G034540/CsaV3_6G013080/CsaV3_7G003180	3
MF	GO:0046983	protein dimerization activity	25/738	271/9200	0.25949	0.827057	CsaV3_1G001960/CsaV3_1G014090/CsaV3_1G014110/CsaV3_1G042610/CsaV3_2G006590/CsaV3_2G010370/CsaV3_2G013770/CsaV3_2G014210/CsaV3_2G030500/CsaV3_2G034540/CsaV3_3G014190/CsaV3_3G022420/CsaV3_4G010090/CsaV3_5G032860/CsaV3_6G003690/CsaV3_6G013080/CsaV3_6G017050/CsaV3_6G017110/CsaV3_6G052910/CsaV3_7G003000/CsaV3_7G025320/CsaV3_7G028390/CsaV3_7G028400/CsaV3_7G030940/CsaV3_7G031310	CsaV3_1G001960/CsaV3_1G014090/CsaV3_1G014110/CsaV3_1G042610/CsaV3_2G006590/CsaV3_2G010370/CsaV3_2G013770/CsaV3_2G014210/CsaV3_2G030500/CsaV3_2G034540/CsaV3_3G014190/CsaV3_3G022420/CsaV3_4G010090/CsaV3_5G032860/CsaV3_6G003690/CsaV3_6G013080/CsaV3_6G017050/CsaV3_6G017110/CsaV3_6G052910/CsaV3_7G003000/CsaV3_7G025320/CsaV3_7G028390/CsaV3_7G028400/CsaV3_7G030940/CsaV3_7G031310	25
MF	GO:0019001	guanyl nucleotide binding	15/738	155/9200	0.260668	0.827057	CsaV3_1G004280/CsaV3_2G002140/CsaV3_2G003560/CsaV3_2G026130/CsaV3_2G034580/CsaV3_3G042530/CsaV3_3G042540/CsaV3_4G008100/CsaV3_4G008510/CsaV3_5G003900/CsaV3_5G020040/CsaV3_5G036630/CsaV3_6G015750/CsaV3_6G050460/CsaV3_7G025160	CsaV3_1G004280/CsaV3_2G002140/CsaV3_2G003560/CsaV3_2G026130/CsaV3_2G034580/CsaV3_3G042530/CsaV3_3G042540/CsaV3_4G008100/CsaV3_4G008510/CsaV3_5G003900/CsaV3_5G020040/CsaV3_5G036630/CsaV3_6G015750/CsaV3_6G050460/CsaV3_7G025160	15
MF	GO:0016462	pyrophosphatase activity	22/738	239/9200	0.279761	0.868375	CsaV3_1G024160/CsaV3_1G033760/CsaV3_2G019440/CsaV3_3G002090/CsaV3_3G004580/CsaV3_3G008430/CsaV3_3G010470/CsaV3_3G015910/CsaV3_4G005820/CsaV3_4G012080/CsaV3_4G012090/CsaV3_4G037390/CsaV3_5G030760/CsaV3_5G034810/CsaV3_6G034290/CsaV3_6G035790/CsaV3_6G040670/CsaV3_6G045040/CsaV3_6G050460/CsaV3_7G027360/CsaV3_7G033300/CsaV3_UNG147160	CsaV3_1G024160/CsaV3_1G033760/CsaV3_2G019440/CsaV3_3G002090/CsaV3_3G004580/CsaV3_3G008430/CsaV3_3G010470/CsaV3_3G015910/CsaV3_4G005820/CsaV3_4G012080/CsaV3_4G012090/CsaV3_4G037390/CsaV3_5G030760/CsaV3_5G034810/CsaV3_6G034290/CsaV3_6G035790/CsaV3_6G040670/CsaV3_6G045040/CsaV3_6G050460/CsaV3_7G027360/CsaV3_7G033300/CsaV3_UNG147160	22
MF	GO:0008138	protein tyrosine/serine/threonine phosphatase activity	2/738	13/9200	0.280448	0.868375	CsaV3_4G025970/CsaV3_5G035770	CsaV3_4G025970/CsaV3_5G035770	2
MF	GO:0015238	drug transmembrane transporter activity	5/738	45/9200	0.291891	0.893048	CsaV3_1G001040/CsaV3_1G011510/CsaV3_2G008050/CsaV3_3G019490/CsaV3_7G003640	CsaV3_1G001040/CsaV3_1G011510/CsaV3_2G008050/CsaV3_3G019490/CsaV3_7G003640	5
MF	GO:0042393	histone binding	2/738	14/9200	0.31114	0.937791	CsaV3_3G033750/CsaV3_4G030410	CsaV3_3G033750/CsaV3_4G030410	2
MF	GO:0016818	hydrolase activity, acting on acid anhydrides, in phosphorus-containing anhydrides	22/738	244/9200	0.313813	0.937791	CsaV3_1G024160/CsaV3_1G033760/CsaV3_2G019440/CsaV3_3G002090/CsaV3_3G004580/CsaV3_3G008430/CsaV3_3G010470/CsaV3_3G015910/CsaV3_4G005820/CsaV3_4G012080/CsaV3_4G012090/CsaV3_4G037390/CsaV3_5G030760/CsaV3_5G034810/CsaV3_6G034290/CsaV3_6G035790/CsaV3_6G040670/CsaV3_6G045040/CsaV3_6G050460/CsaV3_7G027360/CsaV3_7G033300/CsaV3_UNG147160	CsaV3_1G024160/CsaV3_1G033760/CsaV3_2G019440/CsaV3_3G002090/CsaV3_3G004580/CsaV3_3G008430/CsaV3_3G010470/CsaV3_3G015910/CsaV3_4G005820/CsaV3_4G012080/CsaV3_4G012090/CsaV3_4G037390/CsaV3_5G030760/CsaV3_5G034810/CsaV3_6G034290/CsaV3_6G035790/CsaV3_6G040670/CsaV3_6G045040/CsaV3_6G050460/CsaV3_7G027360/CsaV3_7G033300/CsaV3_UNG147160	22
MF	GO:0016817	hydrolase activity, acting on acid anhydrides	22/738	245/9200	0.320772	0.94241	CsaV3_1G024160/CsaV3_1G033760/CsaV3_2G019440/CsaV3_3G002090/CsaV3_3G004580/CsaV3_3G008430/CsaV3_3G010470/CsaV3_3G015910/CsaV3_4G005820/CsaV3_4G012080/CsaV3_4G012090/CsaV3_4G037390/CsaV3_5G030760/CsaV3_5G034810/CsaV3_6G034290/CsaV3_6G035790/CsaV3_6G040670/CsaV3_6G045040/CsaV3_6G050460/CsaV3_7G027360/CsaV3_7G033300/CsaV3_UNG147160	CsaV3_1G024160/CsaV3_1G033760/CsaV3_2G019440/CsaV3_3G002090/CsaV3_3G004580/CsaV3_3G008430/CsaV3_3G010470/CsaV3_3G015910/CsaV3_4G005820/CsaV3_4G012080/CsaV3_4G012090/CsaV3_4G037390/CsaV3_5G030760/CsaV3_5G034810/CsaV3_6G034290/CsaV3_6G035790/CsaV3_6G040670/CsaV3_6G045040/CsaV3_6G050460/CsaV3_7G027360/CsaV3_7G033300/CsaV3_UNG147160	22
MF	GO:0035251	UDP-glucosyltransferase activity	5/738	47/9200	0.324188	0.94241	CsaV3_1G005170/CsaV3_2G018300/CsaV3_2G034730/CsaV3_3G046510/CsaV3_7G031450	CsaV3_1G005170/CsaV3_2G018300/CsaV3_2G034730/CsaV3_3G046510/CsaV3_7G031450	5
MF	GO:0003924	GTPase activity	4/738	36/9200	0.32636	0.94241	CsaV3_3G004580/CsaV3_3G008430/CsaV3_6G040670/CsaV3_6G050460	CsaV3_3G004580/CsaV3_3G008430/CsaV3_6G040670/CsaV3_6G050460	4
MF	GO:0016879	ligase activity, forming carbon-nitrogen bonds	3/738	26/9200	0.347332	0.980927	CsaV3_3G013600/CsaV3_5G002770/CsaV3_5G023920	CsaV3_3G013600/CsaV3_5G002770/CsaV3_5G023920	3
MF	GO:0051082	unfolded protein binding	3/738	26/9200	0.347332	0.980927	CsaV3_1G007990/CsaV3_5G038350/CsaV3_6G037470	CsaV3_1G007990/CsaV3_5G038350/CsaV3_6G037470	3
MF	GO:0003690	double-stranded DNA binding	6/738	61/9200	0.3643	0.999978	CsaV3_2G002320/CsaV3_3G000200/CsaV3_4G030480/CsaV3_5G030060/CsaV3_5G032850/CsaV3_7G029150	CsaV3_2G002320/CsaV3_3G000200/CsaV3_4G030480/CsaV3_5G030060/CsaV3_5G032850/CsaV3_7G029150	6
MF	GO:0008234	cysteine-type peptidase activity	6/738	61/9200	0.3643	0.999978	CsaV3_1G002070/CsaV3_1G009310/CsaV3_2G031540/CsaV3_3G001680/CsaV3_3G010970/CsaV3_5G006240	CsaV3_1G002070/CsaV3_1G009310/CsaV3_2G031540/CsaV3_3G001680/CsaV3_3G010970/CsaV3_5G006240	6
MF	GO:0008408	3'-5' exonuclease activity	2/738	16/9200	0.37151	0.999978	CsaV3_3G040030/CsaV3_6G041210	CsaV3_3G040030/CsaV3_6G041210	2
MF	GO:0008378	galactosyltransferase activity	2/738	18/9200	0.429648	0.999978	CsaV3_1G008060/CsaV3_1G010720	CsaV3_1G008060/CsaV3_1G010720	2
MF	GO:0015078	proton transmembrane transporter activity	6/738	66/9200	0.437773	0.999978	CsaV3_2G018310/CsaV3_3G010470/CsaV3_4G001330/CsaV3_5G036470/CsaV3_6G003980/CsaV3_UNG052430	CsaV3_2G018310/CsaV3_3G010470/CsaV3_4G001330/CsaV3_5G036470/CsaV3_6G003980/CsaV3_UNG052430	6
MF	GO:0016651	oxidoreductase activity, acting on NAD(P)H	4/738	42/9200	0.438372	0.999978	CsaV3_3G017880/CsaV3_5G005640/CsaV3_5G026610/CsaV3_6G044180	CsaV3_3G017880/CsaV3_5G005640/CsaV3_5G026610/CsaV3_6G044180	4
MF	GO:0015291	secondary active transmembrane transporter activity	7/738	79/9200	0.450075	0.999978	CsaV3_1G001040/CsaV3_1G011510/CsaV3_2G008050/CsaV3_2G018310/CsaV3_3G019490/CsaV3_6G003980/CsaV3_7G003640	CsaV3_1G001040/CsaV3_1G011510/CsaV3_2G008050/CsaV3_2G018310/CsaV3_3G019490/CsaV3_6G003980/CsaV3_7G003640	7
MF	GO:0004527	exonuclease activity	2/738	19/9200	0.457636	0.999978	CsaV3_3G040030/CsaV3_6G041210	CsaV3_3G040030/CsaV3_6G041210	2
MF	GO:0015077	monovalent inorganic cation transmembrane transporter activity	7/738	81/9200	0.476661	0.999978	CsaV3_2G018310/CsaV3_3G010470/CsaV3_4G000620/CsaV3_4G001330/CsaV3_5G036470/CsaV3_6G003980/CsaV3_UNG052430	CsaV3_2G018310/CsaV3_3G010470/CsaV3_4G000620/CsaV3_4G001330/CsaV3_5G036470/CsaV3_6G003980/CsaV3_UNG052430	7
MF	GO:0019899	enzyme binding	3/738	32/9200	0.479451	0.999978	CsaV3_3G009610/CsaV3_3G010020/CsaV3_5G008330	CsaV3_3G009610/CsaV3_3G010020/CsaV3_5G008330	3
MF	GO:0004650	polygalacturonase activity	5/738	57/9200	0.486373	0.999978	CsaV3_2G024660/CsaV3_5G031360/CsaV3_5G031490/CsaV3_7G027310/CsaV3_7G030290	CsaV3_2G024660/CsaV3_5G031360/CsaV3_5G031490/CsaV3_7G027310/CsaV3_7G030290	5
MF	GO:0046527	glucosyltransferase activity	6/738	71/9200	0.509552	0.999978	CsaV3_1G005170/CsaV3_2G018300/CsaV3_2G034730/CsaV3_3G036070/CsaV3_3G046510/CsaV3_7G031450	CsaV3_1G005170/CsaV3_2G018300/CsaV3_2G034730/CsaV3_3G036070/CsaV3_3G046510/CsaV3_7G031450	6
MF	GO:0004252	serine-type endopeptidase activity	5/738	60/9200	0.532759	0.999978	CsaV3_1G041110/CsaV3_2G015990/CsaV3_3G002090/CsaV3_5G013700/CsaV3_7G002320	CsaV3_1G041110/CsaV3_2G015990/CsaV3_3G002090/CsaV3_5G013700/CsaV3_7G002320	5
MF	GO:0009982	pseudouridine synthase activity	2/738	22/9200	0.536532	0.999978	CsaV3_2G024410/CsaV3_UNG004080	CsaV3_2G024410/CsaV3_UNG004080	2
MF	GO:0016741	transferase activity, transferring one-carbon groups	12/738	149/9200	0.538398	0.999978	CsaV3_1G004320/CsaV3_1G004330/CsaV3_1G010170/CsaV3_2G034540/CsaV3_3G002580/CsaV3_3G040270/CsaV3_3G043020/CsaV3_6G007420/CsaV3_6G013080/CsaV3_6G045280/CsaV3_7G003180/CsaV3_7G034980	CsaV3_1G004320/CsaV3_1G004330/CsaV3_1G010170/CsaV3_2G034540/CsaV3_3G002580/CsaV3_3G040270/CsaV3_3G043020/CsaV3_6G007420/CsaV3_6G013080/CsaV3_6G045280/CsaV3_7G003180/CsaV3_7G034980	12
MF	GO:0005507	copper ion binding	4/738	48/9200	0.54442	0.999978	CsaV3_1G012920/CsaV3_1G036510/CsaV3_4G017620/CsaV3_6G038150	CsaV3_1G012920/CsaV3_1G036510/CsaV3_4G017620/CsaV3_6G038150	4
MF	GO:0008289	lipid binding	5/738	61/9200	0.5478	0.999978	CsaV3_1G010990/CsaV3_3G024970/CsaV3_6G036520/CsaV3_6G049180/CsaV3_7G006190	CsaV3_1G010990/CsaV3_3G024970/CsaV3_6G036520/CsaV3_6G049180/CsaV3_7G006190	5
MF	GO:0030246	carbohydrate binding	9/738	112/9200	0.548508	0.999978	CsaV3_1G008060/CsaV3_2G015110/CsaV3_3G048110/CsaV3_4G005770/CsaV3_4G006540/CsaV3_5G036760/CsaV3_6G001570/CsaV3_6G029650/CsaV3_6G046760	CsaV3_1G008060/CsaV3_2G015110/CsaV3_3G048110/CsaV3_4G005770/CsaV3_4G006540/CsaV3_5G036760/CsaV3_6G001570/CsaV3_6G029650/CsaV3_6G046760	9
MF	GO:0016616	oxidoreductase activity, acting on the CH-OH group of donors, NAD or NADP as acceptor	7/738	87/9200	0.553955	0.999978	CsaV3_1G037190/CsaV3_3G009430/CsaV3_4G006330/CsaV3_4G037630/CsaV3_6G042130/CsaV3_7G005980/CsaV3_UNG227820	CsaV3_1G037190/CsaV3_3G009430/CsaV3_4G006330/CsaV3_4G037630/CsaV3_6G042130/CsaV3_7G005980/CsaV3_UNG227820	7
MF	GO:0003755	peptidyl-prolyl cis-trans isomerase activity	2/738	23/9200	0.561018	0.999978	CsaV3_3G037500/CsaV3_7G030050	CsaV3_3G037500/CsaV3_7G030050	2
MF	GO:0016859	cis-trans isomerase activity	2/738	23/9200	0.561018	0.999978	CsaV3_3G037500/CsaV3_7G030050	CsaV3_3G037500/CsaV3_7G030050	2
MF	GO:0015297	antiporter activity	6/738	75/9200	0.564416	0.999978	CsaV3_1G001040/CsaV3_1G011510/CsaV3_2G008050/CsaV3_2G018310/CsaV3_3G019490/CsaV3_7G003640	CsaV3_1G001040/CsaV3_1G011510/CsaV3_2G008050/CsaV3_2G018310/CsaV3_3G019490/CsaV3_7G003640	6
MF	GO:0003854	3-beta-hydroxy-delta5-steroid dehydrogenase activity	1/738	2666546	0.566822	0.999978	CsaV3_4G037630	CsaV3_4G037630	1
MF	GO:0004616	phosphogluconate dehydrogenase (decarboxylating) activity	1/738	2666546	0.566822	0.999978	CsaV3_4G006330	CsaV3_4G006330	1
MF	GO:0008276	protein methyltransferase activity	1/738	2666546	0.566822	0.999978	CsaV3_6G007420	CsaV3_6G007420	1
MF	GO:0008565	protein transporter activity	1/738	2666546	0.566822	0.999978	CsaV3_3G017320	CsaV3_3G017320	1
MF	GO:0016229	steroid dehydrogenase activity	1/738	2666546	0.566822	0.999978	CsaV3_4G037630	CsaV3_4G037630	1
MF	GO:0019829	cation-transporting ATPase activity	1/738	2666546	0.566822	0.999978	CsaV3_3G010470	CsaV3_3G010470	1
MF	GO:0022853	active ion transmembrane transporter activity	1/738	2666546	0.566822	0.999978	CsaV3_3G010470	CsaV3_3G010470	1
MF	GO:0033764	steroid dehydrogenase activity, acting on the CH-OH group of donors, NAD or NADP as acceptor	1/738	2666546	0.566822	0.999978	CsaV3_4G037630	CsaV3_4G037630	1
MF	GO:0042625	ATPase coupled ion transmembrane transporter activity	1/738	2666546	0.566822	0.999978	CsaV3_3G010470	CsaV3_3G010470	1
MF	GO:0044769	ATPase activity, coupled to transmembrane movement of ions, rotational mechanism	1/738	2666546	0.566822	0.999978	CsaV3_3G010470	CsaV3_3G010470	1
MF	GO:0016887	ATPase activity	10/738	127/9200	0.572425	0.999978	CsaV3_2G019440/CsaV3_3G002090/CsaV3_3G010470/CsaV3_4G012080/CsaV3_4G012090/CsaV3_4G037390/CsaV3_5G030760/CsaV3_5G034810/CsaV3_6G035790/CsaV3_7G033300	CsaV3_2G019440/CsaV3_3G002090/CsaV3_3G010470/CsaV3_4G012080/CsaV3_4G012090/CsaV3_4G037390/CsaV3_5G030760/CsaV3_5G034810/CsaV3_6G035790/CsaV3_7G033300	10
MF	GO:0016810	hydrolase activity, acting on carbon-nitrogen (but not peptide) bonds	2/738	24/9200	0.584564	0.999978	CsaV3_1G010170/CsaV3_6G043980	CsaV3_1G010170/CsaV3_6G043980	2
MF	GO:0003746	translation elongation factor activity	1/738	2666577	0.601608	0.999978	CsaV3_3G033100	CsaV3_3G033100	1
MF	GO:0008170	N-methyltransferase activity	1/738	2666577	0.601608	0.999978	CsaV3_6G007420	CsaV3_6G007420	1
MF	GO:0016638	oxidoreductase activity, acting on the CH-NH2 group of donors	1/738	2666577	0.601608	0.999978	CsaV3_6G038150	CsaV3_6G038150	1
MF	GO:0016655	oxidoreductase activity, acting on NAD(P)H, quinone or similar compound as acceptor	1/738	2666577	0.601608	0.999978	CsaV3_5G005640	CsaV3_5G005640	1
MF	GO:0016668	oxidoreductase activity, acting on a sulfur group of donors, NAD(P) as acceptor	1/738	2666577	0.601608	0.999978	CsaV3_5G026610	CsaV3_5G026610	1
MF	GO:0047134	protein-disulfide reductase activity	1/738	2666577	0.601608	0.999978	CsaV3_5G026610	CsaV3_5G026610	1
MF	GO:0051537	2 iron, 2 sulfur cluster binding	1/738	2666577	0.601608	0.999978	CsaV3_1G041780	CsaV3_1G041780	1
MF	GO:0052689	carboxylic ester hydrolase activity	5/738	65/9200	0.605487	0.999978	CsaV3_2G018180/CsaV3_2G018190/CsaV3_4G003190/CsaV3_6G048760/CsaV3_6G049200	CsaV3_2G018180/CsaV3_2G018190/CsaV3_4G003190/CsaV3_6G048760/CsaV3_6G049200	5
MF	GO:0010333	terpene synthase activity	2/738	25/9200	0.607164	0.999978	CsaV3_2G017980/CsaV3_3G003680	CsaV3_2G017980/CsaV3_3G003680	2
MF	GO:0004842	ubiquitin-protein transferase activity	4/738	52/9200	0.609037	0.999978	CsaV3_1G034080/CsaV3_1G043860/CsaV3_5G020800/CsaV3_5G031630	CsaV3_1G034080/CsaV3_1G043860/CsaV3_5G020800/CsaV3_5G031630	4
MF	GO:0019787	ubiquitin-like protein transferase activity	4/738	52/9200	0.609037	0.999978	CsaV3_1G034080/CsaV3_1G043860/CsaV3_5G020800/CsaV3_5G031630	CsaV3_1G034080/CsaV3_1G043860/CsaV3_5G020800/CsaV3_5G031630	4
MF	GO:0008509	anion transmembrane transporter activity	3/738	39/9200	0.615596	0.999978	CsaV3_6G052220/CsaV3_7G006330/CsaV3_7G007920	CsaV3_6G052220/CsaV3_7G006330/CsaV3_7G007920	3
MF	GO:0003779	actin binding	2/738	26/9200	0.628816	0.999978	CsaV3_2G008570/CsaV3_7G023520	CsaV3_2G008570/CsaV3_7G023520	2
MF	GO:0015103	inorganic anion transmembrane transporter activity	2/738	26/9200	0.628816	0.999978	CsaV3_6G052220/CsaV3_7G006330	CsaV3_6G052220/CsaV3_7G006330	2
MF	GO:0016765	transferase activity, transferring alkyl or aryl (other than methyl) groups	2/738	26/9200	0.628816	0.999978	CsaV3_3G004760/CsaV3_4G026340	CsaV3_3G004760/CsaV3_4G026340	2
MF	GO:0001076	transcription factor activity, RNA polymerase II transcription factor binding	1/738	2666607	0.633604	0.999978	CsaV3_7G005510	CsaV3_7G005510	1
MF	GO:0001104	RNA polymerase II transcription cofactor activity	1/738	2666607	0.633604	0.999978	CsaV3_7G005510	CsaV3_7G005510	1
MF	GO:0005342	organic acid transmembrane transporter activity	1/738	2666607	0.633604	0.999978	CsaV3_7G007920	CsaV3_7G007920	1
MF	GO:0015171	amino acid transmembrane transporter activity	1/738	2666607	0.633604	0.999978	CsaV3_7G007920	CsaV3_7G007920	1
MF	GO:0016861	intramolecular oxidoreductase activity, interconverting aldoses and ketoses	1/738	2666607	0.633604	0.999978	CsaV3_2G030420	CsaV3_2G030420	1
MF	GO:0046943	carboxylic acid transmembrane transporter activity	1/738	2666607	0.633604	0.999978	CsaV3_7G007920	CsaV3_7G007920	1
MF	GO:0016701	oxidoreductase activity, acting on single donors with incorporation of molecular oxygen	4/738	54/9200	0.63915	0.999978	CsaV3_1G003120/CsaV3_1G041780/CsaV3_3G023420/CsaV3_3G041620	CsaV3_1G003120/CsaV3_1G041780/CsaV3_3G023420/CsaV3_3G041620	4
MF	GO:0016838	carbon-oxygen lyase activity, acting on phosphates	2/738	27/9200	0.649529	0.999978	CsaV3_2G017980/CsaV3_3G003680	CsaV3_2G017980/CsaV3_3G003680	2
MF	GO:0008324	cation transmembrane transporter activity	10/738	135/9200	0.650798	0.999978	CsaV3_1G035760/CsaV3_1G042260/CsaV3_2G018310/CsaV3_3G010470/CsaV3_4G000620/CsaV3_4G001330/CsaV3_5G036470/CsaV3_6G003980/CsaV3_7G033760/CsaV3_UNG052430	CsaV3_1G035760/CsaV3_1G042260/CsaV3_2G018310/CsaV3_3G010470/CsaV3_4G000620/CsaV3_4G001330/CsaV3_5G036470/CsaV3_6G003980/CsaV3_7G033760/CsaV3_UNG052430	10
MF	GO:0051287	NAD binding	4/738	55/9200	0.653627	0.999978	CsaV3_1G037190/CsaV3_2G014210/CsaV3_3G009430/CsaV3_UNG227820	CsaV3_1G037190/CsaV3_2G014210/CsaV3_3G009430/CsaV3_UNG227820	4
MF	GO:0098772	molecular function regulator	10/738	136/9200	0.660017	0.999978	CsaV3_2G018180/CsaV3_2G018190/CsaV3_3G009610/CsaV3_3G010020/CsaV3_3G046730/CsaV3_4G033390/CsaV3_5G008330/CsaV3_5G028280/CsaV3_6G022340/CsaV3_6G049200	CsaV3_2G018180/CsaV3_2G018190/CsaV3_3G009610/CsaV3_3G010020/CsaV3_3G046730/CsaV3_4G033390/CsaV3_5G008330/CsaV3_5G028280/CsaV3_6G022340/CsaV3_6G049200	10
MF	GO:0008514	organic anion transmembrane transporter activity	1/738	13/9200	0.663034	0.999978	CsaV3_7G007920	CsaV3_7G007920	1
MF	GO:0051087	chaperone binding	1/738	13/9200	0.663034	0.999978	CsaV3_1G017210	CsaV3_1G017210	1
MF	GO:0016860	intramolecular oxidoreductase activity	1/738	14/9200	0.690103	0.999978	CsaV3_2G030420	CsaV3_2G030420	1
MF	GO:0022804	active transmembrane transporter activity	9/738	127/9200	0.699491	0.999978	CsaV3_1G001040/CsaV3_1G011510/CsaV3_2G008050/CsaV3_2G018310/CsaV3_3G010470/CsaV3_3G019490/CsaV3_5G030760/CsaV3_6G003980/CsaV3_7G003640	CsaV3_1G001040/CsaV3_1G011510/CsaV3_2G008050/CsaV3_2G018310/CsaV3_3G010470/CsaV3_3G019490/CsaV3_5G030760/CsaV3_6G003980/CsaV3_7G003640	9
MF	GO:0016759	cellulose synthase activity	2/738	30/9200	0.706156	0.999978	CsaV3_2G034730/CsaV3_3G046510	CsaV3_2G034730/CsaV3_3G046510	2
MF	GO:0016760	cellulose synthase (UDP-forming) activity	2/738	30/9200	0.706156	0.999978	CsaV3_2G034730/CsaV3_3G046510	CsaV3_2G034730/CsaV3_3G046510	2
MF	GO:0016791	phosphatase activity	3/738	45/9200	0.711501	0.999978	CsaV3_1G004910/CsaV3_4G025970/CsaV3_5G035770	CsaV3_1G004910/CsaV3_4G025970/CsaV3_5G035770	3
MF	GO:0008168	methyltransferase activity	10/738	142/9200	0.712313	0.999978	CsaV3_1G004320/CsaV3_1G004330/CsaV3_2G034540/CsaV3_3G040270/CsaV3_3G043020/CsaV3_6G007420/CsaV3_6G013080/CsaV3_6G045280/CsaV3_7G003180/CsaV3_7G034980	CsaV3_1G004320/CsaV3_1G004330/CsaV3_2G034540/CsaV3_3G040270/CsaV3_3G043020/CsaV3_6G007420/CsaV3_6G013080/CsaV3_6G045280/CsaV3_7G003180/CsaV3_7G034980	10
MF	GO:0016614	oxidoreductase activity, acting on CH-OH group of donors	10/738	142/9200	0.712313	0.999978	CsaV3_1G037190/CsaV3_1G042760/CsaV3_2G008210/CsaV3_3G009430/CsaV3_4G006330/CsaV3_4G027750/CsaV3_4G037630/CsaV3_6G042130/CsaV3_7G005980/CsaV3_UNG227820	CsaV3_1G037190/CsaV3_1G042760/CsaV3_2G008210/CsaV3_3G009430/CsaV3_4G006330/CsaV3_4G027750/CsaV3_4G037630/CsaV3_6G042130/CsaV3_7G005980/CsaV3_UNG227820	10
MF	GO:0009055	electron transfer activity	8/738	115/9200	0.713706	0.999978	CsaV3_1G042760/CsaV3_3G017880/CsaV3_3G049310/CsaV3_4G001330/CsaV3_5G005640/CsaV3_5G036690/CsaV3_6G012830/CsaV3_6G038220	CsaV3_1G042760/CsaV3_3G017880/CsaV3_3G049310/CsaV3_4G001330/CsaV3_5G005640/CsaV3_5G036690/CsaV3_6G012830/CsaV3_6G038220	8
MF	GO:0008080	N-acetyltransferase activity	1/738	15/9200	0.715	0.999978	CsaV3_6G013010	CsaV3_6G013010	1
MF	GO:0008173	RNA methyltransferase activity	1/738	15/9200	0.715	0.999978	CsaV3_7G034980	CsaV3_7G034980	1
MF	GO:0015079	potassium ion transmembrane transporter activity	1/738	15/9200	0.715	0.999978	CsaV3_4G000620	CsaV3_4G000620	1
MF	GO:0015116	sulfate transmembrane transporter activity	1/738	15/9200	0.715	0.999978	CsaV3_7G006330	CsaV3_7G006330	1
MF	GO:1901682	sulfur compound transmembrane transporter activity	1/738	15/9200	0.715	0.999978	CsaV3_7G006330	CsaV3_7G006330	1
MF	GO:0004857	enzyme inhibitor activity	6/738	88/9200	0.718832	0.999978	CsaV3_2G018180/CsaV3_2G018190/CsaV3_4G033390/CsaV3_5G028280/CsaV3_6G022340/CsaV3_6G049200	CsaV3_2G018180/CsaV3_2G018190/CsaV3_4G033390/CsaV3_5G028280/CsaV3_6G022340/CsaV3_6G049200	6
MF	GO:0008236	serine-type peptidase activity	7/738	102/9200	0.720423	0.999978	CsaV3_1G041110/CsaV3_2G013240/CsaV3_2G015990/CsaV3_3G002090/CsaV3_4G034070/CsaV3_5G013700/CsaV3_7G002320	CsaV3_1G041110/CsaV3_2G013240/CsaV3_2G015990/CsaV3_3G002090/CsaV3_4G034070/CsaV3_5G013700/CsaV3_7G002320	7
MF	GO:0017171	serine hydrolase activity	7/738	102/9200	0.720423	0.999978	CsaV3_1G041110/CsaV3_2G013240/CsaV3_2G015990/CsaV3_3G002090/CsaV3_4G034070/CsaV3_5G013700/CsaV3_7G002320	CsaV3_1G041110/CsaV3_2G013240/CsaV3_2G015990/CsaV3_3G002090/CsaV3_4G034070/CsaV3_5G013700/CsaV3_7G002320	7
MF	GO:0022890	inorganic cation transmembrane transporter activity	8/738	116/9200	0.722734	0.999978	CsaV3_1G035760/CsaV3_2G018310/CsaV3_3G010470/CsaV3_4G000620/CsaV3_4G001330/CsaV3_5G036470/CsaV3_6G003980/CsaV3_UNG052430	CsaV3_1G035760/CsaV3_2G018310/CsaV3_3G010470/CsaV3_4G000620/CsaV3_4G001330/CsaV3_5G036470/CsaV3_6G003980/CsaV3_UNG052430	8
MF	GO:0005516	calmodulin binding	2/738	31/9200	0.723258	0.999978	CsaV3_1G038550/CsaV3_3G040840	CsaV3_1G038550/CsaV3_3G040840	2
MF	GO:0030599	pectinesterase activity	3/738	46/9200	0.725551	0.999978	CsaV3_2G018180/CsaV3_2G018190/CsaV3_6G049200	CsaV3_2G018180/CsaV3_2G018190/CsaV3_6G049200	3
MF	GO:0005096	GTPase activator activity	1/738	16/9200	0.737899	0.999978	CsaV3_3G046730	CsaV3_3G046730	1
MF	GO:0016410	N-acyltransferase activity	1/738	16/9200	0.737899	0.999978	CsaV3_6G013010	CsaV3_6G013010	1
MF	GO:0005215	transporter activity	35/738	479/9200	0.74734	0.999978	CsaV3_1G001040/CsaV3_1G007960/CsaV3_1G011510/CsaV3_1G035760/CsaV3_1G042260/CsaV3_2G007400/CsaV3_2G008050/CsaV3_2G018310/CsaV3_2G032680/CsaV3_3G010470/CsaV3_3G013640/CsaV3_3G017320/CsaV3_3G019490/CsaV3_3G024950/CsaV3_3G032470/CsaV3_3G032820/CsaV3_3G041910/CsaV3_4G000150/CsaV3_4G000620/CsaV3_4G001330/CsaV3_4G025480/CsaV3_5G008950/CsaV3_5G008960/CsaV3_5G030760/CsaV3_5G036470/CsaV3_6G003980/CsaV3_6G0…	CsaV3_1G001040/CsaV3_1G007960/CsaV3_1G011510/CsaV3_1G035760/CsaV3_1G042260/CsaV3_2G007400/CsaV3_2G008050/CsaV3_2G018310/CsaV3_2G032680/CsaV3_3G010470/CsaV3_3G013640/CsaV3_3G017320/CsaV3_3G019490/CsaV3_3G024950/CsaV3_3G032470/CsaV3_3G032820/CsaV3_3G041910/CsaV3_4G000150/CsaV3_4G000620/CsaV3_4G001330/CsaV3_4G025480/CsaV3_5G008950/CsaV3_5G008960/CsaV3_5G030760/CsaV3_5G036470/CsaV3_6G003980/CsaV3_6G0…	35
MF	GO:0004553	hydrolase activity, hydrolyzing O-glycosyl compounds	21/738	296/9200	0.755289	0.999978	CsaV3_1G004550/CsaV3_1G032200/CsaV3_1G033780/CsaV3_2G013100/CsaV3_2G024660/CsaV3_3G036070/CsaV3_3G036980/CsaV3_3G045760/CsaV3_4G000960/CsaV3_4G006540/CsaV3_4G023300/CsaV3_5G003970/CsaV3_5G014080/CsaV3_5G031360/CsaV3_5G031490/CsaV3_5G036760/CsaV3_6G031530/CsaV3_6G044740/CsaV3_7G007800/CsaV3_7G027310/CsaV3_7G030290	CsaV3_1G004550/CsaV3_1G032200/CsaV3_1G033780/CsaV3_2G013100/CsaV3_2G024660/CsaV3_3G036070/CsaV3_3G036980/CsaV3_3G045760/CsaV3_4G000960/CsaV3_4G006540/CsaV3_4G023300/CsaV3_5G003970/CsaV3_5G014080/CsaV3_5G031360/CsaV3_5G031490/CsaV3_5G036760/CsaV3_6G031530/CsaV3_6G044740/CsaV3_7G007800/CsaV3_7G027310/CsaV3_7G030290	21
MF	GO:0004298	threonine-type endopeptidase activity	1/738	17/9200	0.758961	0.999978	CsaV3_4G032560	CsaV3_4G032560	1
MF	GO:0004674	protein serine/threonine kinase activity	1/738	17/9200	0.758961	0.999978	CsaV3_1G011480	CsaV3_1G011480	1
MF	GO:0048038	quinone binding	1/738	17/9200	0.758961	0.999978	CsaV3_6G038150	CsaV3_6G038150	1
MF	GO:0070003	threonine-type peptidase activity	1/738	17/9200	0.758961	0.999978	CsaV3_4G032560	CsaV3_4G032560	1
MF	GO:0016746	transferase activity, transferring acyl groups	10/738	149/9200	0.766454	0.999978	CsaV3_1G042840/CsaV3_3G017330/CsaV3_3G020720/CsaV3_5G034210/CsaV3_6G000600/CsaV3_6G007500/CsaV3_6G013010/CsaV3_6G028610/CsaV3_6G031980/CsaV3_7G002460	CsaV3_1G042840/CsaV3_3G017330/CsaV3_3G020720/CsaV3_5G034210/CsaV3_6G000600/CsaV3_6G007500/CsaV3_6G013010/CsaV3_6G028610/CsaV3_6G031980/CsaV3_7G002460	10
MF	GO:0015075	ion transmembrane transporter activity	15/738	218/9200	0.770137	0.999978	CsaV3_1G035760/CsaV3_1G042260/CsaV3_2G018310/CsaV3_2G032680/CsaV3_3G010470/CsaV3_3G041910/CsaV3_4G000620/CsaV3_4G001330/CsaV3_5G036470/CsaV3_6G003980/CsaV3_6G052220/CsaV3_7G006330/CsaV3_7G007920/CsaV3_7G033760/CsaV3_UNG052430	CsaV3_1G035760/CsaV3_1G042260/CsaV3_2G018310/CsaV3_2G032680/CsaV3_3G010470/CsaV3_3G041910/CsaV3_4G000620/CsaV3_4G001330/CsaV3_5G036470/CsaV3_6G003980/CsaV3_6G052220/CsaV3_7G006330/CsaV3_7G007920/CsaV3_7G033760/CsaV3_UNG052430	15
MF	GO:0008233	peptidase activity	18/738	259/9200	0.772565	0.999978	CsaV3_1G000700/CsaV3_1G000710/CsaV3_1G002070/CsaV3_1G009310/CsaV3_1G041110/CsaV3_2G013240/CsaV3_2G015990/CsaV3_2G031540/CsaV3_3G001680/CsaV3_3G002090/CsaV3_3G010970/CsaV3_4G032560/CsaV3_4G034070/CsaV3_5G006240/CsaV3_5G013700/CsaV3_6G013510/CsaV3_6G032190/CsaV3_7G002320	CsaV3_1G000700/CsaV3_1G000710/CsaV3_1G002070/CsaV3_1G009310/CsaV3_1G041110/CsaV3_2G013240/CsaV3_2G015990/CsaV3_2G031540/CsaV3_3G001680/CsaV3_3G002090/CsaV3_3G010970/CsaV3_4G032560/CsaV3_4G034070/CsaV3_5G006240/CsaV3_5G013700/CsaV3_6G013510/CsaV3_6G032190/CsaV3_7G002320	18
MF	GO:0016798	hydrolase activity, acting on glycosyl bonds	22/738	313/9200	0.774102	0.999978	CsaV3_1G004550/CsaV3_1G032200/CsaV3_1G033780/CsaV3_2G003320/CsaV3_2G013100/CsaV3_2G024660/CsaV3_3G036070/CsaV3_3G036980/CsaV3_3G045760/CsaV3_4G000960/CsaV3_4G006540/CsaV3_4G023300/CsaV3_5G003970/CsaV3_5G014080/CsaV3_5G031360/CsaV3_5G031490/CsaV3_5G036760/CsaV3_6G031530/CsaV3_6G044740/CsaV3_7G007800/CsaV3_7G027310/CsaV3_7G030290	CsaV3_1G004550/CsaV3_1G032200/CsaV3_1G033780/CsaV3_2G003320/CsaV3_2G013100/CsaV3_2G024660/CsaV3_3G036070/CsaV3_3G036980/CsaV3_3G045760/CsaV3_4G000960/CsaV3_4G006540/CsaV3_4G023300/CsaV3_5G003970/CsaV3_5G014080/CsaV3_5G031360/CsaV3_5G031490/CsaV3_5G036760/CsaV3_6G031530/CsaV3_6G044740/CsaV3_7G007800/CsaV3_7G027310/CsaV3_7G030290	22
MF	GO:0016407	acetyltransferase activity	1/738	18/9200	0.778332	0.999978	CsaV3_6G013010	CsaV3_6G013010	1
MF	GO:0008757	S-adenosylmethionine-dependent methyltransferase activity	1/738	19/9200	0.796149	0.999978	CsaV3_6G007420	CsaV3_6G007420	1
MF	GO:0070011	peptidase activity, acting on L-amino acid peptides	17/738	250/9200	0.79678	0.999978	CsaV3_1G000700/CsaV3_1G000710/CsaV3_1G002070/CsaV3_1G009310/CsaV3_1G041110/CsaV3_2G013240/CsaV3_2G015990/CsaV3_2G031540/CsaV3_3G001680/CsaV3_3G002090/CsaV3_3G010970/CsaV3_4G032560/CsaV3_4G034070/CsaV3_5G006240/CsaV3_5G013700/CsaV3_6G013510/CsaV3_7G002320	CsaV3_1G000700/CsaV3_1G000710/CsaV3_1G002070/CsaV3_1G009310/CsaV3_1G041110/CsaV3_2G013240/CsaV3_2G015990/CsaV3_2G031540/CsaV3_3G001680/CsaV3_3G002090/CsaV3_3G010970/CsaV3_4G032560/CsaV3_4G034070/CsaV3_5G006240/CsaV3_5G013700/CsaV3_6G013510/CsaV3_7G002320	17
MF	GO:0045735	nutrient reservoir activity	2/738	37/9200	0.808998	0.999978	CsaV3_3G013090/CsaV3_3G032610	CsaV3_3G013090/CsaV3_3G032610	2
MF	GO:0015318	inorganic molecular entity transmembrane transporter activity	13/738	198/9200	0.812885	0.999978	CsaV3_1G035760/CsaV3_2G018310/CsaV3_2G032680/CsaV3_3G010470/CsaV3_3G041910/CsaV3_4G000620/CsaV3_4G001330/CsaV3_5G036470/CsaV3_6G003980/CsaV3_6G052220/CsaV3_7G006330/CsaV3_7G007920/CsaV3_UNG052430	CsaV3_1G035760/CsaV3_2G018310/CsaV3_2G032680/CsaV3_3G010470/CsaV3_3G041910/CsaV3_4G000620/CsaV3_4G001330/CsaV3_5G036470/CsaV3_6G003980/CsaV3_6G052220/CsaV3_7G006330/CsaV3_7G007920/CsaV3_UNG052430	13
MF	GO:0004601	peroxidase activity	6/738	99/9200	0.816235	0.999978	CsaV3_1G012650/CsaV3_3G042120/CsaV3_3G042140/CsaV3_3G047080/CsaV3_6G002170/CsaV3_6G034310	CsaV3_1G012650/CsaV3_3G042120/CsaV3_3G042140/CsaV3_3G047080/CsaV3_6G002170/CsaV3_6G034310	6
MF	GO:0008194	UDP-glycosyltransferase activity	5/738	85/9200	0.822549	0.999978	CsaV3_1G005170/CsaV3_2G018300/CsaV3_2G034730/CsaV3_3G046510/CsaV3_7G031450	CsaV3_1G005170/CsaV3_2G018300/CsaV3_2G034730/CsaV3_3G046510/CsaV3_7G031450	5
MF	GO:0008047	enzyme activator activity	1/738	21/9200	0.827606	0.999978	CsaV3_3G046730	CsaV3_3G046730	1
MF	GO:0016684	oxidoreductase activity, acting on peroxide as acceptor	6/738	101/9200	0.830722	0.999978	CsaV3_1G012650/CsaV3_3G042120/CsaV3_3G042140/CsaV3_3G047080/CsaV3_6G002170/CsaV3_6G034310	CsaV3_1G012650/CsaV3_3G042120/CsaV3_3G042140/CsaV3_3G047080/CsaV3_6G002170/CsaV3_6G034310	6
MF	GO:0030695	GTPase regulator activity	1/738	22/9200	0.841466	0.999978	CsaV3_3G046730	CsaV3_3G046730	1
MF	GO:0008135	translation factor activity, RNA binding	2/738	40/9200	0.842293	0.999978	CsaV3_3G019240/CsaV3_3G033100	CsaV3_3G019240/CsaV3_3G033100	2
MF	GO:0005509	calcium ion binding	8/738	134/9200	0.852692	0.999978	CsaV3_1G015710/CsaV3_2G013830/CsaV3_2G031600/CsaV3_3G033720/CsaV3_4G006200/CsaV3_4G027680/CsaV3_5G021810/CsaV3_5G028160	CsaV3_1G015710/CsaV3_2G013830/CsaV3_2G031600/CsaV3_3G033720/CsaV3_4G006200/CsaV3_4G027680/CsaV3_5G021810/CsaV3_5G028160	8
MF	GO:0000989	transcription factor activity, transcription factor binding	1/738	23/9200	0.854214	0.999978	CsaV3_7G005510	CsaV3_7G005510	1
MF	GO:0003712	transcription cofactor activity	1/738	23/9200	0.854214	0.999978	CsaV3_7G005510	CsaV3_7G005510	1
MF	GO:0016762	xyloglucan:xyloglucosyl transferase activity	1/738	23/9200	0.854214	0.999978	CsaV3_3G036070	CsaV3_3G036070	1
MF	GO:0016209	antioxidant activity	6/738	105/9200	0.856947	0.999978	CsaV3_1G012650/CsaV3_3G042120/CsaV3_3G042140/CsaV3_3G047080/CsaV3_6G002170/CsaV3_6G034310	CsaV3_1G012650/CsaV3_3G042120/CsaV3_3G042140/CsaV3_3G047080/CsaV3_6G002170/CsaV3_6G034310	6
MF	GO:0003743	translation initiation factor activity	1/738	24/9200	0.865938	0.999978	CsaV3_3G019240	CsaV3_3G019240	1
MF	GO:0004970	ionotropic glutamate receptor activity	1/738	24/9200	0.865938	0.999978	CsaV3_2G032680	CsaV3_2G032680	1
MF	GO:0005230	extracellular ligand-gated ion channel activity	1/738	24/9200	0.865938	0.999978	CsaV3_2G032680	CsaV3_2G032680	1
MF	GO:0008066	glutamate receptor activity	1/738	24/9200	0.865938	0.999978	CsaV3_2G032680	CsaV3_2G032680	1
MF	GO:0015276	ligand-gated ion channel activity	1/738	24/9200	0.865938	0.999978	CsaV3_2G032680	CsaV3_2G032680	1
MF	GO:0022824	transmitter-gated ion channel activity	1/738	24/9200	0.865938	0.999978	CsaV3_2G032680	CsaV3_2G032680	1
MF	GO:0022834	ligand-gated channel activity	1/738	24/9200	0.865938	0.999978	CsaV3_2G032680	CsaV3_2G032680	1
MF	GO:0022835	transmitter-gated channel activity	1/738	24/9200	0.865938	0.999978	CsaV3_2G032680	CsaV3_2G032680	1
MF	GO:0030594	neurotransmitter receptor activity	1/738	24/9200	0.865938	0.999978	CsaV3_2G032680	CsaV3_2G032680	1
MF	GO:0016702	oxidoreductase activity, acting on single donors with incorporation of molecular oxygen, incorporation of two atoms of oxygen	2/738	43/9200	0.870237	0.999978	CsaV3_1G003120/CsaV3_3G041620	CsaV3_1G003120/CsaV3_3G041620	2
MF	GO:0030234	enzyme regulator activity	7/738	123/9200	0.87348	0.999978	CsaV3_2G018180/CsaV3_2G018190/CsaV3_3G046730/CsaV3_4G033390/CsaV3_5G028280/CsaV3_6G022340/CsaV3_6G049200	CsaV3_2G018180/CsaV3_2G018190/CsaV3_3G046730/CsaV3_4G033390/CsaV3_5G028280/CsaV3_6G022340/CsaV3_6G049200	7
MF	GO:0008238	exopeptidase activity	2/738	44/9200	0.878491	0.999978	CsaV3_1G000700/CsaV3_1G000710	CsaV3_1G000700/CsaV3_1G000710	2
MF	GO:0051213	dioxygenase activity	2/738	45/9200	0.886258	0.999978	CsaV3_1G003120/CsaV3_3G041620	CsaV3_1G003120/CsaV3_3G041620	2
MF	GO:0004888	transmembrane signaling receptor activity	1/738	26/9200	0.886636	0.999978	CsaV3_2G032680	CsaV3_2G032680	1
MF	GO:0004175	endopeptidase activity	7/738	127/9200	0.892912	0.999978	CsaV3_1G041110/CsaV3_2G015990/CsaV3_3G002090/CsaV3_4G032560/CsaV3_5G013700/CsaV3_6G013510/CsaV3_7G002320	CsaV3_1G041110/CsaV3_2G015990/CsaV3_3G002090/CsaV3_4G032560/CsaV3_5G013700/CsaV3_6G013510/CsaV3_7G002320	7
MF	GO:0042626	ATPase activity, coupled to transmembrane movement of substances	2/738	46/9200	0.893563	0.999978	CsaV3_3G010470/CsaV3_5G030760	CsaV3_3G010470/CsaV3_5G030760	2
MF	GO:0043492	ATPase activity, coupled to movement of substances	2/738	46/9200	0.893563	0.999978	CsaV3_3G010470/CsaV3_5G030760	CsaV3_3G010470/CsaV3_5G030760	2
MF	GO:0004497	monooxygenase activity	1/738	27/9200	0.895756	0.999978	CsaV3_1G041780	CsaV3_1G041780	1
MF	GO:0016627	oxidoreductase activity, acting on the CH-CH group of donors	1/738	27/9200	0.895756	0.999978	CsaV3_7G021780	CsaV3_7G021780	1
MF	GO:0060589	nucleoside-triphosphatase regulator activity	1/738	27/9200	0.895756	0.999978	CsaV3_3G046730	CsaV3_3G046730	1
MF	GO:0005543	phospholipid binding	1/738	28/9200	0.904143	0.999978	CsaV3_7G006190	CsaV3_7G006190	1
MF	GO:0015399	primary active transmembrane transporter activity	2/738	48/9200	0.906882	0.999978	CsaV3_3G010470/CsaV3_5G030760	CsaV3_3G010470/CsaV3_5G030760	2
MF	GO:0015405	P-P-bond-hydrolysis-driven transmembrane transporter activity	2/738	48/9200	0.906882	0.999978	CsaV3_3G010470/CsaV3_5G030760	CsaV3_3G010470/CsaV3_5G030760	2
MF	GO:0000988	transcription factor activity, protein binding	1/738	29/9200	0.911855	0.999978	CsaV3_7G005510	CsaV3_7G005510	1
MF	GO:0015036	disulfide oxidoreductase activity	2/738	49/9200	0.912941	0.999978	CsaV3_5G026610/CsaV3_5G036690	CsaV3_5G026610/CsaV3_5G036690	2
MF	GO:0005216	ion channel activity	2/738	50/9200	0.918629	0.999978	CsaV3_2G032680/CsaV3_3G041910	CsaV3_2G032680/CsaV3_3G041910	2
MF	GO:0015267	channel activity	2/738	50/9200	0.918629	0.999978	CsaV3_2G032680/CsaV3_3G041910	CsaV3_2G032680/CsaV3_3G041910	2
MF	GO:0022803	passive transmembrane transporter activity	2/738	50/9200	0.918629	0.999978	CsaV3_2G032680/CsaV3_3G041910	CsaV3_2G032680/CsaV3_3G041910	2
MF	GO:0022838	substrate-specific channel activity	2/738	50/9200	0.918629	0.999978	CsaV3_2G032680/CsaV3_3G041910	CsaV3_2G032680/CsaV3_3G041910	2
MF	GO:0046873	metal ion transmembrane transporter activity	2/738	50/9200	0.918629	0.999978	CsaV3_1G035760/CsaV3_4G000620	CsaV3_1G035760/CsaV3_4G000620	2
MF	GO:0015298	solute:cation antiporter activity	1/738	30/9200	0.918949	0.999978	CsaV3_2G018310	CsaV3_2G018310	1
MF	GO:0015299	solute:proton antiporter activity	1/738	30/9200	0.918949	0.999978	CsaV3_2G018310	CsaV3_2G018310	1
MF	GO:0022836	gated channel activity	1/738	30/9200	0.918949	0.999978	CsaV3_2G032680	CsaV3_2G032680	1
MF	GO:0022839	ion gated channel activity	1/738	30/9200	0.918949	0.999978	CsaV3_2G032680	CsaV3_2G032680	1
MF	GO:0042578	phosphoric ester hydrolase activity	3/738	69/9200	0.923171	0.999978	CsaV3_1G004910/CsaV3_4G025970/CsaV3_5G035770	CsaV3_1G004910/CsaV3_4G025970/CsaV3_5G035770	3
MF	GO:0050662	coenzyme binding	16/738	275/9200	0.935911	0.999978	CsaV3_1G031330/CsaV3_1G037190/CsaV3_1G040170/CsaV3_1G042760/CsaV3_2G008210/CsaV3_2G014210/CsaV3_3G009430/CsaV3_4G004900/CsaV3_4G007380/CsaV3_4G009080/CsaV3_4G014580/CsaV3_4G027750/CsaV3_5G017320/CsaV3_6G015190/CsaV3_7G007260/CsaV3_UNG227820	CsaV3_1G031330/CsaV3_1G037190/CsaV3_1G040170/CsaV3_1G042760/CsaV3_2G008210/CsaV3_2G014210/CsaV3_3G009430/CsaV3_4G004900/CsaV3_4G007380/CsaV3_4G009080/CsaV3_4G014580/CsaV3_4G027750/CsaV3_5G017320/CsaV3_6G015190/CsaV3_7G007260/CsaV3_UNG227820	16
MF	GO:0022857	transmembrane transporter activity	22/738	363/9200	0.938206	0.999978	CsaV3_1G001040/CsaV3_1G011510/CsaV3_1G035760/CsaV3_1G042260/CsaV3_2G008050/CsaV3_2G018310/CsaV3_2G032680/CsaV3_3G010470/CsaV3_3G019490/CsaV3_3G024950/CsaV3_3G041910/CsaV3_4G000620/CsaV3_4G001330/CsaV3_5G030760/CsaV3_5G036470/CsaV3_6G003980/CsaV3_6G052220/CsaV3_7G003640/CsaV3_7G006330/CsaV3_7G007920/CsaV3_7G033760/CsaV3_UNG052430	CsaV3_1G001040/CsaV3_1G011510/CsaV3_1G035760/CsaV3_1G042260/CsaV3_2G008050/CsaV3_2G018310/CsaV3_2G032680/CsaV3_3G010470/CsaV3_3G019490/CsaV3_3G024950/CsaV3_3G041910/CsaV3_4G000620/CsaV3_4G001330/CsaV3_5G030760/CsaV3_5G036470/CsaV3_6G003980/CsaV3_6G052220/CsaV3_7G003640/CsaV3_7G006330/CsaV3_7G007920/CsaV3_7G033760/CsaV3_UNG052430	22
MF	GO:0016667	oxidoreductase activity, acting on a sulfur group of donors	2/738	57/9200	0.949659	0.999978	CsaV3_5G026610/CsaV3_5G036690	CsaV3_5G026610/CsaV3_5G036690	2
MF	GO:0038023	signaling receptor activity	1/738	36/9200	0.951015	0.999978	CsaV3_2G032680	CsaV3_2G032680	1
MF	GO:0060089	molecular transducer activity	1/738	36/9200	0.951015	0.999978	CsaV3_2G032680	CsaV3_2G032680	1
MF	GO:0015035	protein disulfide oxidoreductase activity	1/738	38/9200	0.958587	0.999978	CsaV3_5G036690	CsaV3_5G036690	1
MF	GO:0004222	metalloendopeptidase activity	1/738	42/9200	0.970405	0.999978	CsaV3_6G013510	CsaV3_6G013510	1
MF	GO:0016758	transferase activity, transferring hexosyl groups	12/738	244/9200	0.979234	0.999978	CsaV3_1G005170/CsaV3_1G008060/CsaV3_1G010720/CsaV3_1G045360/CsaV3_2G018300/CsaV3_2G034730/CsaV3_3G030550/CsaV3_3G036070/CsaV3_3G046510/CsaV3_4G008840/CsaV3_7G003260/CsaV3_7G031450	CsaV3_1G005170/CsaV3_1G008060/CsaV3_1G010720/CsaV3_1G045360/CsaV3_2G018300/CsaV3_2G034730/CsaV3_3G030550/CsaV3_3G036070/CsaV3_3G046510/CsaV3_4G008840/CsaV3_7G003260/CsaV3_7G031450	12
MF	GO:0005506	iron ion binding	11/738	230/9200	0.980931	0.999978	CsaV3_2G009060/CsaV3_2G011110/CsaV3_2G035460/CsaV3_2G036340/CsaV3_3G010300/CsaV3_3G023420/CsaV3_5G003460/CsaV3_5G003470/CsaV3_6G004090/CsaV3_6G007600/CsaV3_6G051670	CsaV3_2G009060/CsaV3_2G011110/CsaV3_2G035460/CsaV3_2G036340/CsaV3_3G010300/CsaV3_3G023420/CsaV3_5G003460/CsaV3_5G003470/CsaV3_6G004090/CsaV3_6G007600/CsaV3_6G051670	11
MF	GO:0016747	transferase activity, transferring acyl groups other than amino-acyl groups	4/738	113/9200	0.98359	0.999978	CsaV3_3G017330/CsaV3_3G020720/CsaV3_6G013010/CsaV3_7G002460	CsaV3_3G017330/CsaV3_3G020720/CsaV3_6G013010/CsaV3_7G002460	4
MF	GO:0008237	metallopeptidase activity	1/738	50/9200	0.984892	0.999978	CsaV3_6G013510	CsaV3_6G013510	1
MF	GO:0020037	heme binding	15/738	299/9200	0.984895	0.999978	CsaV3_1G012650/CsaV3_2G009060/CsaV3_2G011110/CsaV3_2G035460/CsaV3_2G036340/CsaV3_3G042120/CsaV3_3G042140/CsaV3_3G047080/CsaV3_5G003460/CsaV3_5G003470/CsaV3_6G002170/CsaV3_6G004090/CsaV3_6G007600/CsaV3_6G034310/CsaV3_6G051670	CsaV3_1G012650/CsaV3_2G009060/CsaV3_2G011110/CsaV3_2G035460/CsaV3_2G036340/CsaV3_3G042120/CsaV3_3G042140/CsaV3_3G047080/CsaV3_5G003460/CsaV3_5G003470/CsaV3_6G002170/CsaV3_6G004090/CsaV3_6G007600/CsaV3_6G034310/CsaV3_6G051670	15
MF	GO:0016757	transferase activity, transferring glycosyl groups	15/738	302/9200	0.986625	0.999978	CsaV3_1G005170/CsaV3_1G008060/CsaV3_1G010720/CsaV3_1G045360/CsaV3_2G018300/CsaV3_2G030570/CsaV3_2G034730/CsaV3_3G014630/CsaV3_3G030550/CsaV3_3G036070/CsaV3_3G046510/CsaV3_4G008840/CsaV3_5G029840/CsaV3_7G003260/CsaV3_7G031450	CsaV3_1G005170/CsaV3_1G008060/CsaV3_1G010720/CsaV3_1G045360/CsaV3_2G018300/CsaV3_2G030570/CsaV3_2G034730/CsaV3_3G014630/CsaV3_3G030550/CsaV3_3G036070/CsaV3_3G046510/CsaV3_4G008840/CsaV3_5G029840/CsaV3_7G003260/CsaV3_7G031450	15
MF	GO:0016705	oxidoreductase activity, acting on paired donors, with incorporation or reduction of molecular oxygen	11/738	238/9200	0.986647	0.999978	CsaV3_1G036250/CsaV3_2G001370/CsaV3_2G009060/CsaV3_2G011110/CsaV3_2G035460/CsaV3_2G036340/CsaV3_5G003460/CsaV3_5G003470/CsaV3_6G004090/CsaV3_6G007600/CsaV3_6G051670	CsaV3_1G036250/CsaV3_2G001370/CsaV3_2G009060/CsaV3_2G011110/CsaV3_2G035460/CsaV3_2G036340/CsaV3_5G003460/CsaV3_5G003470/CsaV3_6G004090/CsaV3_6G007600/CsaV3_6G051670	11
MF	GO:0050660	flavin adenine dinucleotide binding	3/738	97/9200	0.986866	0.999978	CsaV3_1G042760/CsaV3_2G008210/CsaV3_4G027750	CsaV3_1G042760/CsaV3_2G008210/CsaV3_4G027750	3
MF	GO:0046906	tetrapyrrole binding	15/738	303/9200	0.98716	0.999978	CsaV3_1G012650/CsaV3_2G009060/CsaV3_2G011110/CsaV3_2G035460/CsaV3_2G036340/CsaV3_3G042120/CsaV3_3G042140/CsaV3_3G047080/CsaV3_5G003460/CsaV3_5G003470/CsaV3_6G002170/CsaV3_6G004090/CsaV3_6G007600/CsaV3_6G034310/CsaV3_6G051670	CsaV3_1G012650/CsaV3_2G009060/CsaV3_2G011110/CsaV3_2G035460/CsaV3_2G036340/CsaV3_3G042120/CsaV3_3G042140/CsaV3_3G047080/CsaV3_5G003460/CsaV3_5G003470/CsaV3_6G002170/CsaV3_6G004090/CsaV3_6G007600/CsaV3_6G034310/CsaV3_6G051670	15
MF	GO:0004871	signal transducer activity	1/738	55/9200	0.990079	0.999978	CsaV3_2G032680	CsaV3_2G032680	1
MF	GO:0043531	ADP binding	1/738	55/9200	0.990079	0.999978	CsaV3_3G041210	CsaV3_3G041210	1
MF	GO:0008270	zinc ion binding	14/738	335/9200	0.99851	0.999978	CsaV3_1G000700/CsaV3_1G000710/CsaV3_1G003230/CsaV3_1G006430/CsaV3_1G031890/CsaV3_1G032930/CsaV3_1G037190/CsaV3_3G043020/CsaV3_5G034480/CsaV3_6G001560/CsaV3_6G007420/CsaV3_6G015220/CsaV3_6G031940/CsaV3_7G031220	CsaV3_1G000700/CsaV3_1G000710/CsaV3_1G003230/CsaV3_1G006430/CsaV3_1G031890/CsaV3_1G032930/CsaV3_1G037190/CsaV3_3G043020/CsaV3_5G034480/CsaV3_6G001560/CsaV3_6G007420/CsaV3_6G015220/CsaV3_6G031940/CsaV3_7G031220	14
MF	GO:0043565	sequence-specific DNA binding	5/738	188/9200	0.999486	0.999978	CsaV3_2G034600/CsaV3_3G010690/CsaV3_5G015440/CsaV3_5G032510/CsaV3_7G000980	CsaV3_2G034600/CsaV3_3G010690/CsaV3_5G015440/CsaV3_5G032510/CsaV3_7G000980	5
MF	GO:0003700	DNA binding transcription factor activity	12/738	374/9200	0.999972	0.999978	CsaV3_2G011540/CsaV3_2G032370/CsaV3_2G034600/CsaV3_3G010690/CsaV3_3G048560/CsaV3_4G010090/CsaV3_5G002210/CsaV3_5G015440/CsaV3_5G032510/CsaV3_6G012590/CsaV3_6G052910/CsaV3_7G000980	CsaV3_2G011540/CsaV3_2G032370/CsaV3_2G034600/CsaV3_3G010690/CsaV3_3G048560/CsaV3_4G010090/CsaV3_5G002210/CsaV3_5G015440/CsaV3_5G032510/CsaV3_6G012590/CsaV3_6G052910/CsaV3_7G000980	12
MF	GO:0140110	transcription regulator activity	13/738	397/9200	0.999978	0.999978	CsaV3_2G011540/CsaV3_2G032370/CsaV3_2G034600/CsaV3_3G010690/CsaV3_3G048560/CsaV3_4G010090/CsaV3_5G002210/CsaV3_5G015440/CsaV3_5G032510/CsaV3_6G012590/CsaV3_6G052910/CsaV3_7G000980/CsaV3_7G005510	CsaV3_2G011540/CsaV3_2G032370/CsaV3_2G034600/CsaV3_3G010690/CsaV3_3G048560/CsaV3_4G010090/CsaV3_5G002210/CsaV3_5G015440/CsaV3_5G032510/CsaV3_6G012590/CsaV3_6G052910/CsaV3_7G000980/CsaV3_7G005510	13

## Sheet: MEGreen_Yellow GO enrichment
Category	GOID	Description	GeneRatio	BgRatio	pvalue	padj	geneID	geneName	Count
BP	GO:0042221	response to chemical	10/144	107/6278	0.000154966	0.00909457	CsaV3_1G000090/CsaV3_2G008060/CsaV3_2G015030/CsaV3_3G030900/CsaV3_5G001910/CsaV3_5G003220/CsaV3_6G007970/CsaV3_6G021720/CsaV3_6G040760/CsaV3_6G052060	CsaV3_1G000090/CsaV3_2G008060/CsaV3_2G015030/CsaV3_3G030900/CsaV3_5G001910/CsaV3_5G003220/CsaV3_6G007970/CsaV3_6G021720/CsaV3_6G040760/CsaV3_6G052060	10
BP	GO:0006811	ion transport	17/144	280/6278	0.000206686	0.00909457	CsaV3_1G014320/CsaV3_1G032160/CsaV3_1G043750/CsaV3_2G010040/CsaV3_2G025600/CsaV3_3G010810/CsaV3_3G047190/CsaV3_3G049640/CsaV3_3G049960/CsaV3_4G006290/CsaV3_4G028730/CsaV3_4G030760/CsaV3_5G038390/CsaV3_6G013480/CsaV3_6G046550/CsaV3_6G047350/CsaV3_7G007720	CsaV3_1G014320/CsaV3_1G032160/CsaV3_1G043750/CsaV3_2G010040/CsaV3_2G025600/CsaV3_3G010810/CsaV3_3G047190/CsaV3_3G049640/CsaV3_3G049960/CsaV3_4G006290/CsaV3_4G028730/CsaV3_4G030760/CsaV3_5G038390/CsaV3_6G013480/CsaV3_6G046550/CsaV3_6G047350/CsaV3_7G007720	17
BP	GO:0009719	response to endogenous stimulus	7/144	55/6278	0.000233194	0.00909457	CsaV3_1G000090/CsaV3_3G030900/CsaV3_5G001910/CsaV3_6G007970/CsaV3_6G021720/CsaV3_6G040760/CsaV3_6G052060	CsaV3_1G000090/CsaV3_3G030900/CsaV3_5G001910/CsaV3_6G007970/CsaV3_6G021720/CsaV3_6G040760/CsaV3_6G052060	7
BP	GO:0009725	response to hormone	7/144	55/6278	0.000233194	0.00909457	CsaV3_1G000090/CsaV3_3G030900/CsaV3_5G001910/CsaV3_6G007970/CsaV3_6G021720/CsaV3_6G040760/CsaV3_6G052060	CsaV3_1G000090/CsaV3_3G030900/CsaV3_5G001910/CsaV3_6G007970/CsaV3_6G021720/CsaV3_6G040760/CsaV3_6G052060	7
BP	GO:0010033	response to organic substance	7/144	55/6278	0.000233194	0.00909457	CsaV3_1G000090/CsaV3_3G030900/CsaV3_5G001910/CsaV3_6G007970/CsaV3_6G021720/CsaV3_6G040760/CsaV3_6G052060	CsaV3_1G000090/CsaV3_3G030900/CsaV3_5G001910/CsaV3_6G007970/CsaV3_6G021720/CsaV3_6G040760/CsaV3_6G052060	7
BP	GO:0006812	cation transport	13/144	197/6278	0.000546251	0.0177532	CsaV3_1G014320/CsaV3_1G032160/CsaV3_2G010040/CsaV3_2G025600/CsaV3_3G010810/CsaV3_3G049640/CsaV3_3G049960/CsaV3_4G006290/CsaV3_4G030760/CsaV3_6G013480/CsaV3_6G046550/CsaV3_6G047350/CsaV3_7G007720	CsaV3_1G014320/CsaV3_1G032160/CsaV3_2G010040/CsaV3_2G025600/CsaV3_3G010810/CsaV3_3G049640/CsaV3_3G049960/CsaV3_4G006290/CsaV3_4G030760/CsaV3_6G013480/CsaV3_6G046550/CsaV3_6G047350/CsaV3_7G007720	13
BP	GO:0007275	multicellular organism development	3/144	21/6278	0.011612	0.251592	CsaV3_3G001850/CsaV3_3G038880/CsaV3_4G030630	CsaV3_3G001850/CsaV3_3G038880/CsaV3_4G030630	3
BP	GO:0032502	developmental process	3/144	21/6278	0.011612	0.251592	CsaV3_3G001850/CsaV3_3G038880/CsaV3_4G030630	CsaV3_3G001850/CsaV3_3G038880/CsaV3_4G030630	3
BP	GO:0048856	anatomical structure development	3/144	21/6278	0.011612	0.251592	CsaV3_3G001850/CsaV3_3G038880/CsaV3_4G030630	CsaV3_3G001850/CsaV3_3G038880/CsaV3_4G030630	3
BP	GO:0006979	response to oxidative stress	6/144	88/6278	0.0152391	0.286081	CsaV3_1G008260/CsaV3_3G016670/CsaV3_4G004610/CsaV3_UNG126970/CsaV3_UNG160170/CsaV3_UNG223560	CsaV3_1G008260/CsaV3_3G016670/CsaV3_4G004610/CsaV3_UNG126970/CsaV3_UNG160170/CsaV3_UNG223560	6
BP	GO:0030001	metal ion transport	7/144	115/6278	0.0161379	0.286081	CsaV3_1G014320/CsaV3_3G010810/CsaV3_3G049960/CsaV3_4G030760/CsaV3_6G046550/CsaV3_6G047350/CsaV3_7G007720	CsaV3_1G014320/CsaV3_3G010810/CsaV3_3G049960/CsaV3_4G030760/CsaV3_6G046550/CsaV3_6G047350/CsaV3_7G007720	7
BP	GO:0044272	sulfur compound biosynthetic process	2/144	1599368	0.0296623	0.482012	CsaV3_6G039940/CsaV3_7G029140	CsaV3_6G039940/CsaV3_7G029140	2
BP	GO:0009605	response to external stimulus	2/144	15/6278	0.0451283	0.676924	CsaV3_6G036060/CsaV3_6G036100	CsaV3_6G036060/CsaV3_6G036100	2
BP	GO:0009733	response to auxin	3/144	40/6278	0.0630529	0.878237	CsaV3_3G030900/CsaV3_6G007970/CsaV3_6G040760	CsaV3_3G030900/CsaV3_6G007970/CsaV3_6G040760	3
BP	GO:0032501	multicellular organismal process	3/144	55/6278	0.131413	0.991694	CsaV3_3G001850/CsaV3_3G038880/CsaV3_4G030630	CsaV3_3G001850/CsaV3_3G038880/CsaV3_4G030630	3
BP	GO:0006790	sulfur compound metabolic process	2/144	28/6278	0.134274	0.991694	CsaV3_6G039940/CsaV3_7G029140	CsaV3_6G039940/CsaV3_7G029140	2
BP	GO:0009308	amine metabolic process	2/144	28/6278	0.134274	0.991694	CsaV3_2G001450/CsaV3_3G020560	CsaV3_2G001450/CsaV3_3G020560	2
BP	GO:0009108	coenzyme biosynthetic process	3/144	56/6278	0.13665	0.991694	CsaV3_6G039940/CsaV3_7G021470/CsaV3_7G029140	CsaV3_6G039940/CsaV3_7G021470/CsaV3_7G029140	3
BP	GO:0055085	transmembrane transport	13/144	409/6278	0.143865	0.991694	CsaV3_1G014320/CsaV3_1G031550/CsaV3_1G032160/CsaV3_2G008060/CsaV3_2G025600/CsaV3_3G047190/CsaV3_3G049640/CsaV3_4G006290/CsaV3_5G003220/CsaV3_5G038390/CsaV3_6G013480/CsaV3_6G048430/CsaV3_7G007720	CsaV3_1G014320/CsaV3_1G031550/CsaV3_1G032160/CsaV3_2G008060/CsaV3_2G025600/CsaV3_3G047190/CsaV3_3G049640/CsaV3_4G006290/CsaV3_5G003220/CsaV3_5G038390/CsaV3_6G013480/CsaV3_6G048430/CsaV3_7G007720	13
BP	GO:0051188	cofactor biosynthetic process	3/144	66/6278	0.192508	0.991694	CsaV3_6G039940/CsaV3_7G021470/CsaV3_7G029140	CsaV3_6G039940/CsaV3_7G021470/CsaV3_7G029140	3
BP	GO:0006732	coenzyme metabolic process	3/144	67/6278	0.198386	0.991694	CsaV3_6G039940/CsaV3_7G021470/CsaV3_7G029140	CsaV3_6G039940/CsaV3_7G021470/CsaV3_7G029140	3
BP	GO:0006308	DNA catabolic process	1/144	1599307	0.207222	0.991694	CsaV3_5G002400	CsaV3_5G002400	1
BP	GO:0070838	divalent metal ion transport	1/144	1599307	0.207222	0.991694	CsaV3_3G010810	CsaV3_3G010810	1
BP	GO:0072511	divalent inorganic cation transport	1/144	1599307	0.207222	0.991694	CsaV3_3G010810	CsaV3_3G010810	1
BP	GO:0090305	nucleic acid phosphodiester bond hydrolysis	1/144	1599307	0.207222	0.991694	CsaV3_5G002400	CsaV3_5G002400	1
BP	GO:0006414	translational elongation	1/144	1599338	0.225435	0.991694	CsaV3_1G009580	CsaV3_1G009580	1
BP	GO:0009664	plant-type cell wall organization	1/144	1599338	0.225435	0.991694	CsaV3_4G010170	CsaV3_4G010170	1
BP	GO:0071669	plant-type cell wall organization or biogenesis	1/144	1599338	0.225435	0.991694	CsaV3_4G010170	CsaV3_4G010170	1
BP	GO:0009073	aromatic amino acid family biosynthetic process	1/144	1599368	0.243233	0.991694	CsaV3_2G003300	CsaV3_2G003300	1
BP	GO:0042546	cell wall biogenesis	1/144	1599368	0.243233	0.991694	CsaV3_4G010170	CsaV3_4G010170	1
BP	GO:0072528	pyrimidine-containing compound biosynthetic process	1/144	1599368	0.243233	0.991694	CsaV3_7G029140	CsaV3_7G029140	1
BP	GO:0034655	nucleobase-containing compound catabolic process	2/144	43/6278	0.259078	0.991694	CsaV3_5G002400/CsaV3_7G021470	CsaV3_5G002400/CsaV3_7G021470	2
BP	GO:0006835	dicarboxylic acid transport	1/144	13/6278	0.260624	0.991694	CsaV3_1G043750	CsaV3_1G043750	1
BP	GO:0015740	C4-dicarboxylate transport	1/144	13/6278	0.260624	0.991694	CsaV3_1G043750	CsaV3_1G043750	1
BP	GO:0015743	malate transport	1/144	13/6278	0.260624	0.991694	CsaV3_1G043750	CsaV3_1G043750	1
BP	GO:0006855	drug transmembrane transport	2/144	44/6278	0.267644	0.991694	CsaV3_2G008060/CsaV3_5G003220	CsaV3_2G008060/CsaV3_5G003220	2
BP	GO:0015893	drug transport	2/144	44/6278	0.267644	0.991694	CsaV3_2G008060/CsaV3_5G003220	CsaV3_2G008060/CsaV3_5G003220	2
BP	GO:0042493	response to drug	2/144	44/6278	0.267644	0.991694	CsaV3_2G008060/CsaV3_5G003220	CsaV3_2G008060/CsaV3_5G003220	2
BP	GO:0006576	cellular biogenic amine metabolic process	1/144	14/6278	0.277619	0.991694	CsaV3_3G020560	CsaV3_3G020560	1
BP	GO:0044106	cellular amine metabolic process	1/144	14/6278	0.277619	0.991694	CsaV3_3G020560	CsaV3_3G020560	1
BP	GO:0072527	pyrimidine-containing compound metabolic process	1/144	14/6278	0.277619	0.991694	CsaV3_7G029140	CsaV3_7G029140	1
BP	GO:0008272	sulfate transport	1/144	15/6278	0.294225	0.991694	CsaV3_4G028730	CsaV3_4G028730	1
BP	GO:0072348	sulfur compound transport	1/144	15/6278	0.294225	0.991694	CsaV3_4G028730	CsaV3_4G028730	1
BP	GO:0046351	disaccharide biosynthetic process	1/144	16/6278	0.310453	0.991694	CsaV3_5G035080	CsaV3_5G035080	1
BP	GO:0046700	heterocycle catabolic process	2/144	50/6278	0.318879	0.991694	CsaV3_5G002400/CsaV3_7G021470	CsaV3_5G002400/CsaV3_7G021470	2
BP	GO:0032259	methylation	1/144	17/6278	0.326309	0.991694	CsaV3_6G008610	CsaV3_6G008610	1
BP	GO:0044270	cellular nitrogen compound catabolic process	2/144	51/6278	0.327355	0.991694	CsaV3_5G002400/CsaV3_7G021470	CsaV3_5G002400/CsaV3_7G021470	2
BP	GO:1901361	organic cyclic compound catabolic process	2/144	51/6278	0.327355	0.991694	CsaV3_5G002400/CsaV3_7G021470	CsaV3_5G002400/CsaV3_7G021470	2
BP	GO:0019439	aromatic compound catabolic process	2/144	52/6278	0.335804	0.991694	CsaV3_5G002400/CsaV3_7G021470	CsaV3_5G002400/CsaV3_7G021470	2
BP	GO:0051186	cofactor metabolic process	3/144	92/6278	0.353637	0.991694	CsaV3_6G039940/CsaV3_7G021470/CsaV3_7G029140	CsaV3_6G039940/CsaV3_7G021470/CsaV3_7G029140	3
BP	GO:0009072	aromatic amino acid family metabolic process	1/144	19/6278	0.356944	0.991694	CsaV3_2G003300	CsaV3_2G003300	1
BP	GO:0009312	oligosaccharide biosynthetic process	1/144	19/6278	0.356944	0.991694	CsaV3_5G035080	CsaV3_5G035080	1
BP	GO:0045229	external encapsulating structure organization	2/144	57/6278	0.377524	0.991694	CsaV3_4G010170/CsaV3_5G000510	CsaV3_4G010170/CsaV3_5G000510	2
BP	GO:0071555	cell wall organization	2/144	57/6278	0.377524	0.991694	CsaV3_4G010170/CsaV3_5G000510	CsaV3_4G010170/CsaV3_5G000510	2
BP	GO:0006352	DNA-templated transcription, initiation	1/144	22/6278	0.400322	0.991694	CsaV3_3G021990	CsaV3_3G021990	1
BP	GO:0017144	drug metabolic process	3/144	100/6278	0.403777	0.991694	CsaV3_3G020560/CsaV3_6G039940/CsaV3_7G021470	CsaV3_3G020560/CsaV3_6G039940/CsaV3_7G021470	3
BP	GO:0090407	organophosphate biosynthetic process	3/144	101/6278	0.409977	0.991694	CsaV3_7G006180/CsaV3_7G021470/CsaV3_7G029140	CsaV3_7G006180/CsaV3_7G021470/CsaV3_7G029140	3
BP	GO:0006820	anion transport	2/144	61/6278	0.410119	0.991694	CsaV3_1G043750/CsaV3_4G028730	CsaV3_1G043750/CsaV3_4G028730	2
BP	GO:0007264	small GTPase mediated signal transduction	2/144	61/6278	0.410119	0.991694	CsaV3_4G003850/CsaV3_7G010050	CsaV3_4G003850/CsaV3_7G010050	2
BP	GO:0001522	pseudouridine synthesis	1/144	23/6278	0.414125	0.991694	CsaV3_1G004580	CsaV3_1G004580	1
BP	GO:0005984	disaccharide metabolic process	1/144	23/6278	0.414125	0.991694	CsaV3_5G035080	CsaV3_5G035080	1
BP	GO:0008654	phospholipid biosynthetic process	1/144	25/6278	0.440792	0.991694	CsaV3_7G006180	CsaV3_7G006180	1
BP	GO:0009311	oligosaccharide metabolic process	1/144	26/6278	0.45367	0.991694	CsaV3_5G035080	CsaV3_5G035080	1
BP	GO:0035556	intracellular signal transduction	3/144	110/6278	0.464788	0.991694	CsaV3_2G009260/CsaV3_4G003850/CsaV3_7G010050	CsaV3_2G009260/CsaV3_4G003850/CsaV3_7G010050	3
BP	GO:0015698	inorganic anion transport	1/144	27/6278	0.466254	0.991694	CsaV3_4G028730	CsaV3_4G028730	1
BP	GO:0071554	cell wall organization or biogenesis	2/144	69/6278	0.472669	0.991694	CsaV3_4G010170/CsaV3_5G000510	CsaV3_4G010170/CsaV3_5G000510	2
BP	GO:0072330	monocarboxylic acid biosynthetic process	2/144	69/6278	0.472669	0.991694	CsaV3_6G006560/CsaV3_7G021470	CsaV3_6G006560/CsaV3_7G021470	2
BP	GO:0006096	glycolytic process	1/144	28/6278	0.478549	0.991694	CsaV3_7G021470	CsaV3_7G021470	1
BP	GO:0006325	chromatin organization	1/144	28/6278	0.478549	0.991694	CsaV3_6G017380	CsaV3_6G017380	1
BP	GO:0006757	ATP generation from ADP	1/144	28/6278	0.478549	0.991694	CsaV3_7G021470	CsaV3_7G021470	1
BP	GO:0009135	purine nucleoside diphosphate metabolic process	1/144	28/6278	0.478549	0.991694	CsaV3_7G021470	CsaV3_7G021470	1
BP	GO:0009179	purine ribonucleoside diphosphate metabolic process	1/144	28/6278	0.478549	0.991694	CsaV3_7G021470	CsaV3_7G021470	1
BP	GO:0009185	ribonucleoside diphosphate metabolic process	1/144	28/6278	0.478549	0.991694	CsaV3_7G021470	CsaV3_7G021470	1
BP	GO:0042866	pyruvate biosynthetic process	1/144	28/6278	0.478549	0.991694	CsaV3_7G021470	CsaV3_7G021470	1
BP	GO:0046031	ADP metabolic process	1/144	28/6278	0.478549	0.991694	CsaV3_7G021470	CsaV3_7G021470	1
BP	GO:0009166	nucleotide catabolic process	1/144	29/6278	0.490564	0.991694	CsaV3_7G021470	CsaV3_7G021470	1
BP	GO:1901292	nucleoside phosphate catabolic process	1/144	29/6278	0.490564	0.991694	CsaV3_7G021470	CsaV3_7G021470	1
BP	GO:0006950	response to stress	7/144	289/6278	0.497048	0.991694	CsaV3_1G008260/CsaV3_2G015030/CsaV3_3G016670/CsaV3_4G004610/CsaV3_UNG126970/CsaV3_UNG160170/CsaV3_UNG223560	CsaV3_1G008260/CsaV3_2G015030/CsaV3_3G016670/CsaV3_4G004610/CsaV3_UNG126970/CsaV3_UNG160170/CsaV3_UNG223560	7
BP	GO:0006090	pyruvate metabolic process	1/144	30/6278	0.502303	0.991694	CsaV3_7G021470	CsaV3_7G021470	1
BP	GO:0006165	nucleoside diphosphate phosphorylation	1/144	30/6278	0.502303	0.991694	CsaV3_7G021470	CsaV3_7G021470	1
BP	GO:0006887	exocytosis	1/144	30/6278	0.502303	0.991694	CsaV3_5G006610	CsaV3_5G006610	1
BP	GO:0015711	organic anion transport	1/144	30/6278	0.502303	0.991694	CsaV3_1G043750	CsaV3_1G043750	1
BP	GO:0015849	organic acid transport	1/144	30/6278	0.502303	0.991694	CsaV3_1G043750	CsaV3_1G043750	1
BP	GO:0032940	secretion by cell	1/144	30/6278	0.502303	0.991694	CsaV3_5G006610	CsaV3_5G006610	1
BP	GO:0046903	secretion	1/144	30/6278	0.502303	0.991694	CsaV3_5G006610	CsaV3_5G006610	1
BP	GO:0046939	nucleotide phosphorylation	1/144	30/6278	0.502303	0.991694	CsaV3_7G021470	CsaV3_7G021470	1
BP	GO:0046942	carboxylic acid transport	1/144	30/6278	0.502303	0.991694	CsaV3_1G043750	CsaV3_1G043750	1
BP	GO:0009132	nucleoside diphosphate metabolic process	1/144	31/6278	0.513773	0.991694	CsaV3_7G021470	CsaV3_7G021470	1
BP	GO:0016053	organic acid biosynthetic process	3/144	120/6278	0.522972	0.991694	CsaV3_2G003300/CsaV3_6G006560/CsaV3_7G021470	CsaV3_2G003300/CsaV3_6G006560/CsaV3_7G021470	3
BP	GO:0046394	carboxylic acid biosynthetic process	3/144	120/6278	0.522972	0.991694	CsaV3_2G003300/CsaV3_6G006560/CsaV3_7G021470	CsaV3_2G003300/CsaV3_6G006560/CsaV3_7G021470	3
BP	GO:0046434	organophosphate catabolic process	1/144	32/6278	0.524982	0.991694	CsaV3_7G021470	CsaV3_7G021470	1
BP	GO:0044248	cellular catabolic process	3/144	121/6278	0.528604	0.991694	CsaV3_2G007690/CsaV3_5G002400/CsaV3_7G021470	CsaV3_2G007690/CsaV3_5G002400/CsaV3_7G021470	3
BP	GO:0006633	fatty acid biosynthetic process	1/144	34/6278	0.546634	0.991694	CsaV3_6G006560	CsaV3_6G006560	1
BP	GO:0009451	RNA modification	1/144	34/6278	0.546634	0.991694	CsaV3_1G004580	CsaV3_1G004580	1
BP	GO:0019359	nicotinamide nucleotide biosynthetic process	1/144	34/6278	0.546634	0.991694	CsaV3_7G021470	CsaV3_7G021470	1
BP	GO:0019363	pyridine nucleotide biosynthetic process	1/144	34/6278	0.546634	0.991694	CsaV3_7G021470	CsaV3_7G021470	1
BP	GO:0034404	nucleobase-containing small molecule biosynthetic process	1/144	34/6278	0.546634	0.991694	CsaV3_7G021470	CsaV3_7G021470	1
BP	GO:1901607	alpha-amino acid biosynthetic process	1/144	36/6278	0.567305	0.991694	CsaV3_2G003300	CsaV3_2G003300	1
BP	GO:0072525	pyridine-containing compound biosynthetic process	1/144	37/6278	0.577287	0.991694	CsaV3_7G021470	CsaV3_7G021470	1
BP	GO:0032787	monocarboxylic acid metabolic process	2/144	88/6278	0.604047	0.991694	CsaV3_6G006560/CsaV3_7G021470	CsaV3_6G006560/CsaV3_7G021470	2
BP	GO:0000160	phosphorelay signal transduction system	1/144	40/6278	0.605882	0.991694	CsaV3_2G009260	CsaV3_2G009260	1
BP	GO:0016052	carbohydrate catabolic process	1/144	40/6278	0.605882	0.991694	CsaV3_7G021470	CsaV3_7G021470	1
BP	GO:0019362	pyridine nucleotide metabolic process	1/144	40/6278	0.605882	0.991694	CsaV3_7G021470	CsaV3_7G021470	1
BP	GO:0046496	nicotinamide nucleotide metabolic process	1/144	40/6278	0.605882	0.991694	CsaV3_7G021470	CsaV3_7G021470	1
BP	GO:0006733	oxidoreduction coenzyme metabolic process	1/144	41/6278	0.61498	0.991694	CsaV3_7G021470	CsaV3_7G021470	1
BP	GO:0016567	protein ubiquitination	1/144	43/6278	0.632555	0.991694	CsaV3_2G016590	CsaV3_2G016590	1
BP	GO:0072524	pyridine-containing compound metabolic process	1/144	43/6278	0.632555	0.991694	CsaV3_7G021470	CsaV3_7G021470	1
BP	GO:0009056	catabolic process	3/144	141/6278	0.632995	0.991694	CsaV3_2G007690/CsaV3_5G002400/CsaV3_7G021470	CsaV3_2G007690/CsaV3_5G002400/CsaV3_7G021470	3
BP	GO:0008610	lipid biosynthetic process	2/144	94/6278	0.640103	0.991694	CsaV3_6G006560/CsaV3_7G006180	CsaV3_6G006560/CsaV3_7G006180	2
BP	GO:0032446	protein modification by small protein conjugation	1/144	44/6278	0.641041	0.991694	CsaV3_2G016590	CsaV3_2G016590	1
BP	GO:0008652	cellular amino acid biosynthetic process	1/144	45/6278	0.649333	0.991694	CsaV3_2G003300	CsaV3_2G003300	1
BP	GO:0051276	chromosome organization	1/144	45/6278	0.649333	0.991694	CsaV3_6G017380	CsaV3_6G017380	1
BP	GO:0044283	small molecule biosynthetic process	3/144	145/6278	0.651864	0.991694	CsaV3_2G003300/CsaV3_6G006560/CsaV3_7G021470	CsaV3_2G003300/CsaV3_6G006560/CsaV3_7G021470	3
BP	GO:0006644	phospholipid metabolic process	1/144	46/6278	0.657434	0.991694	CsaV3_7G006180	CsaV3_7G006180	1
BP	GO:0006754	ATP biosynthetic process	1/144	46/6278	0.657434	0.991694	CsaV3_7G021470	CsaV3_7G021470	1
BP	GO:0015979	photosynthesis	1/144	46/6278	0.657434	0.991694	CsaV3_3G008130	CsaV3_3G008130	1
BP	GO:0042545	cell wall modification	1/144	46/6278	0.657434	0.991694	CsaV3_5G000510	CsaV3_5G000510	1
BP	GO:0009142	nucleoside triphosphate biosynthetic process	1/144	48/6278	0.673084	0.991694	CsaV3_7G021470	CsaV3_7G021470	1
BP	GO:0009145	purine nucleoside triphosphate biosynthetic process	1/144	48/6278	0.673084	0.991694	CsaV3_7G021470	CsaV3_7G021470	1
BP	GO:0009201	ribonucleoside triphosphate biosynthetic process	1/144	48/6278	0.673084	0.991694	CsaV3_7G021470	CsaV3_7G021470	1
BP	GO:0009206	purine ribonucleoside triphosphate biosynthetic process	1/144	48/6278	0.673084	0.991694	CsaV3_7G021470	CsaV3_7G021470	1
BP	GO:0009127	purine nucleoside monophosphate biosynthetic process	1/144	49/6278	0.68064	0.991694	CsaV3_7G021470	CsaV3_7G021470	1
BP	GO:0009156	ribonucleoside monophosphate biosynthetic process	1/144	49/6278	0.68064	0.991694	CsaV3_7G021470	CsaV3_7G021470	1
BP	GO:0009168	purine ribonucleoside monophosphate biosynthetic process	1/144	49/6278	0.68064	0.991694	CsaV3_7G021470	CsaV3_7G021470	1
BP	GO:1901605	alpha-amino acid metabolic process	1/144	49/6278	0.68064	0.991694	CsaV3_2G003300	CsaV3_2G003300	1
BP	GO:0006631	fatty acid metabolic process	1/144	50/6278	0.688023	0.991694	CsaV3_6G006560	CsaV3_6G006560	1
BP	GO:0009124	nucleoside monophosphate biosynthetic process	1/144	50/6278	0.688023	0.991694	CsaV3_7G021470	CsaV3_7G021470	1
BP	GO:0006091	generation of precursor metabolites and energy	1/144	51/6278	0.695236	0.991694	CsaV3_7G021470	CsaV3_7G021470	1
BP	GO:0019637	organophosphate metabolic process	3/144	155/6278	0.696	0.991694	CsaV3_7G006180/CsaV3_7G021470/CsaV3_7G029140	CsaV3_7G006180/CsaV3_7G021470/CsaV3_7G029140	3
BP	GO:0009152	purine ribonucleotide biosynthetic process	1/144	54/6278	0.715897	0.991694	CsaV3_7G021470	CsaV3_7G021470	1
BP	GO:0009260	ribonucleotide biosynthetic process	1/144	54/6278	0.715897	0.991694	CsaV3_7G021470	CsaV3_7G021470	1
BP	GO:0046034	ATP metabolic process	1/144	54/6278	0.715897	0.991694	CsaV3_7G021470	CsaV3_7G021470	1
BP	GO:0046390	ribose phosphate biosynthetic process	1/144	54/6278	0.715897	0.991694	CsaV3_7G021470	CsaV3_7G021470	1
BP	GO:0065008	regulation of biological quality	2/144	109/6278	0.718974	0.991694	CsaV3_2G001450/CsaV3_5G034880	CsaV3_2G001450/CsaV3_5G034880	2
BP	GO:0006164	purine nucleotide biosynthetic process	1/144	56/6278	0.728892	0.991694	CsaV3_7G021470	CsaV3_7G021470	1
BP	GO:0044265	cellular macromolecule catabolic process	1/144	56/6278	0.728892	0.991694	CsaV3_5G002400	CsaV3_5G002400	1
BP	GO:0009126	purine nucleoside monophosphate metabolic process	1/144	57/6278	0.735167	0.991694	CsaV3_7G021470	CsaV3_7G021470	1
BP	GO:0009144	purine nucleoside triphosphate metabolic process	1/144	57/6278	0.735167	0.991694	CsaV3_7G021470	CsaV3_7G021470	1
BP	GO:0009161	ribonucleoside monophosphate metabolic process	1/144	57/6278	0.735167	0.991694	CsaV3_7G021470	CsaV3_7G021470	1
BP	GO:0009167	purine ribonucleoside monophosphate metabolic process	1/144	57/6278	0.735167	0.991694	CsaV3_7G021470	CsaV3_7G021470	1
BP	GO:0009199	ribonucleoside triphosphate metabolic process	1/144	57/6278	0.735167	0.991694	CsaV3_7G021470	CsaV3_7G021470	1
BP	GO:0009205	purine ribonucleoside triphosphate metabolic process	1/144	57/6278	0.735167	0.991694	CsaV3_7G021470	CsaV3_7G021470	1
BP	GO:0072522	purine-containing compound biosynthetic process	1/144	57/6278	0.735167	0.991694	CsaV3_7G021470	CsaV3_7G021470	1
BP	GO:0009123	nucleoside monophosphate metabolic process	1/144	58/6278	0.741297	0.991694	CsaV3_7G021470	CsaV3_7G021470	1
BP	GO:0009141	nucleoside triphosphate metabolic process	1/144	58/6278	0.741297	0.991694	CsaV3_7G021470	CsaV3_7G021470	1
BP	GO:0034637	cellular carbohydrate biosynthetic process	1/144	61/6278	0.758855	0.991694	CsaV3_5G035080	CsaV3_5G035080	1
BP	GO:0070647	protein modification by small protein conjugation or removal	1/144	64/6278	0.775229	0.991694	CsaV3_2G016590	CsaV3_2G016590	1
BP	GO:0006259	DNA metabolic process	2/144	126/6278	0.790379	0.991694	CsaV3_5G002400/CsaV3_UNG239520	CsaV3_5G002400/CsaV3_UNG239520	2
BP	GO:0016051	carbohydrate biosynthetic process	1/144	68/6278	0.795355	0.991694	CsaV3_5G035080	CsaV3_5G035080	1
BP	GO:0016043	cellular component organization	3/144	183/6278	0.797063	0.991694	CsaV3_4G010170/CsaV3_5G000510/CsaV3_6G017380	CsaV3_4G010170/CsaV3_5G000510/CsaV3_6G017380	3
BP	GO:0044255	cellular lipid metabolic process	2/144	128/6278	0.797643	0.991694	CsaV3_6G006560/CsaV3_7G006180	CsaV3_6G006560/CsaV3_7G006180	2
BP	GO:0007165	signal transduction	3/144	184/6278	0.800092	0.991694	CsaV3_2G009260/CsaV3_4G003850/CsaV3_7G010050	CsaV3_2G009260/CsaV3_4G003850/CsaV3_7G010050	3
BP	GO:0023052	signaling	3/144	184/6278	0.800092	0.991694	CsaV3_2G009260/CsaV3_4G003850/CsaV3_7G010050	CsaV3_2G009260/CsaV3_4G003850/CsaV3_7G010050	3
BP	GO:0009165	nucleotide biosynthetic process	1/144	70/6278	0.804737	0.991694	CsaV3_7G021470	CsaV3_7G021470	1
BP	GO:0022607	cellular component assembly	1/144	70/6278	0.804737	0.991694	CsaV3_4G010170	CsaV3_4G010170	1
BP	GO:1901293	nucleoside phosphate biosynthetic process	1/144	70/6278	0.804737	0.991694	CsaV3_7G021470	CsaV3_7G021470	1
BP	GO:0009150	purine ribonucleotide metabolic process	1/144	71/6278	0.809266	0.991694	CsaV3_7G021470	CsaV3_7G021470	1
BP	GO:0009259	ribonucleotide metabolic process	1/144	71/6278	0.809266	0.991694	CsaV3_7G021470	CsaV3_7G021470	1
BP	GO:0006163	purine nucleotide metabolic process	1/144	73/6278	0.818014	0.991694	CsaV3_7G021470	CsaV3_7G021470	1
BP	GO:0072521	purine-containing compound metabolic process	1/144	74/6278	0.822237	0.991694	CsaV3_7G021470	CsaV3_7G021470	1
BP	GO:1901575	organic substance catabolic process	2/144	136/6278	0.824532	0.991694	CsaV3_5G002400/CsaV3_7G021470	CsaV3_5G002400/CsaV3_7G021470	2
BP	GO:0006629	lipid metabolic process	4/144	249/6278	0.82991	0.991694	CsaV3_6G006560/CsaV3_6G050780/CsaV3_7G006180/CsaV3_7G026640	CsaV3_6G006560/CsaV3_6G050780/CsaV3_7G006180/CsaV3_7G026640	4
BP	GO:0009057	macromolecule catabolic process	1/144	76/6278	0.830394	0.991694	CsaV3_5G002400	CsaV3_5G002400	1
BP	GO:0019693	ribose phosphate metabolic process	1/144	77/6278	0.834332	0.991694	CsaV3_7G021470	CsaV3_7G021470	1
BP	GO:0006508	proteolysis	4/144	256/6278	0.845754	0.991694	CsaV3_1G044380/CsaV3_5G037570/CsaV3_5G037640/CsaV3_7G000190	CsaV3_1G044380/CsaV3_5G037570/CsaV3_5G037640/CsaV3_7G000190	4
BP	GO:0045454	cell redox homeostasis	1/144	81/6278	0.849196	0.991694	CsaV3_5G034880	CsaV3_5G034880	1
BP	GO:0019725	cellular homeostasis	1/144	82/6278	0.852701	0.991694	CsaV3_5G034880	CsaV3_5G034880	1
BP	GO:0042592	homeostatic process	1/144	83/6278	0.856124	0.991694	CsaV3_5G034880	CsaV3_5G034880	1
BP	GO:0006996	organelle organization	1/144	84/6278	0.859468	0.991694	CsaV3_6G017380	CsaV3_6G017380	1
BP	GO:0071840	cellular component organization or biogenesis	3/144	218/6278	0.882664	0.995166	CsaV3_4G010170/CsaV3_5G000510/CsaV3_6G017380	CsaV3_4G010170/CsaV3_5G000510/CsaV3_6G017380	3
BP	GO:0007154	cell communication	3/144	222/6278	0.890071	0.995166	CsaV3_2G009260/CsaV3_4G003850/CsaV3_7G010050	CsaV3_2G009260/CsaV3_4G003850/CsaV3_7G010050	3
BP	GO:0019752	carboxylic acid metabolic process	3/144	222/6278	0.890071	0.995166	CsaV3_2G003300/CsaV3_6G006560/CsaV3_7G021470	CsaV3_2G003300/CsaV3_6G006560/CsaV3_7G021470	3
BP	GO:0009117	nucleotide metabolic process	1/144	95/6278	0.89153	0.995166	CsaV3_7G021470	CsaV3_7G021470	1
BP	GO:0006753	nucleoside phosphate metabolic process	1/144	96/6278	0.894057	0.995166	CsaV3_7G021470	CsaV3_7G021470	1
BP	GO:0044262	cellular carbohydrate metabolic process	1/144	96/6278	0.894057	0.995166	CsaV3_5G035080	CsaV3_5G035080	1
BP	GO:0043436	oxoacid metabolic process	3/144	230/6278	0.90365	0.995166	CsaV3_2G003300/CsaV3_6G006560/CsaV3_7G021470	CsaV3_2G003300/CsaV3_6G006560/CsaV3_7G021470	3
BP	GO:0006082	organic acid metabolic process	3/144	231/6278	0.905238	0.995166	CsaV3_2G003300/CsaV3_6G006560/CsaV3_7G021470	CsaV3_2G003300/CsaV3_6G006560/CsaV3_7G021470	3
BP	GO:0044085	cellular component biogenesis	1/144	105/6278	0.914318	0.995166	CsaV3_4G010170	CsaV3_4G010170	1
BP	GO:0006520	cellular amino acid metabolic process	1/144	110/6278	0.923859	0.995166	CsaV3_2G003300	CsaV3_2G003300	1
BP	GO:0055086	nucleobase-containing small molecule metabolic process	1/144	111/6278	0.925637	0.995166	CsaV3_7G021470	CsaV3_7G021470	1
BP	GO:1901137	carbohydrate derivative biosynthetic process	1/144	111/6278	0.925637	0.995166	CsaV3_7G021470	CsaV3_7G021470	1
BP	GO:0051716	cellular response to stimulus	3/144	249/6278	0.930065	0.995166	CsaV3_2G009260/CsaV3_4G003850/CsaV3_7G010050	CsaV3_2G009260/CsaV3_4G003850/CsaV3_7G010050	3
BP	GO:0016192	vesicle-mediated transport	1/144	116/6278	0.933925	0.995166	CsaV3_5G006610	CsaV3_5G006610	1
BP	GO:0005975	carbohydrate metabolic process	6/144	446/6278	0.949298	0.997979	CsaV3_1G002220/CsaV3_1G042530/CsaV3_3G045360/CsaV3_5G035080/CsaV3_7G021470/CsaV3_UNG186450	CsaV3_1G002220/CsaV3_1G042530/CsaV3_3G045360/CsaV3_5G035080/CsaV3_7G021470/CsaV3_UNG186450	6
BP	GO:0071705	nitrogen compound transport	1/144	137/6278	0.959819	0.997979	CsaV3_2G010040	CsaV3_2G010040	1
BP	GO:0071702	organic substance transport	1/144	150/6278	0.970493	0.997979	CsaV3_1G043750	CsaV3_1G043750	1
BP	GO:1901566	organonitrogen compound biosynthetic process	6/144	488/6278	0.972676	0.997979	CsaV3_1G009580/CsaV3_2G003300/CsaV3_3G020560/CsaV3_7G008490/CsaV3_7G021470/CsaV3_7G029140	CsaV3_1G009580/CsaV3_2G003300/CsaV3_3G020560/CsaV3_7G008490/CsaV3_7G021470/CsaV3_7G029140	6
BP	GO:1901135	carbohydrate derivative metabolic process	1/144	163/6278	0.978346	0.997979	CsaV3_7G021470	CsaV3_7G021470	1
BP	GO:0006412	translation	2/144	271/6278	0.987648	0.997979	CsaV3_1G009580/CsaV3_7G008490	CsaV3_1G009580/CsaV3_7G008490	2
BP	GO:0043043	peptide biosynthetic process	2/144	274/6278	0.9884	0.997979	CsaV3_1G009580/CsaV3_7G008490	CsaV3_1G009580/CsaV3_7G008490	2
BP	GO:0044281	small molecule metabolic process	3/144	353/6278	0.989542	0.997979	CsaV3_2G003300/CsaV3_6G006560/CsaV3_7G021470	CsaV3_2G003300/CsaV3_6G006560/CsaV3_7G021470	3
BP	GO:0006518	peptide metabolic process	2/144	281/6278	0.989986	0.997979	CsaV3_1G009580/CsaV3_7G008490	CsaV3_1G009580/CsaV3_7G008490	2
BP	GO:0043604	amide biosynthetic process	2/144	286/6278	0.990987	0.997979	CsaV3_1G009580/CsaV3_7G008490	CsaV3_1G009580/CsaV3_7G008490	2
BP	GO:0043603	cellular amide metabolic process	2/144	297/6278	0.992861	0.997979	CsaV3_1G009580/CsaV3_7G008490	CsaV3_1G009580/CsaV3_7G008490	2
BP	GO:0048193	Golgi vesicle transport	0/144	20/6278	1	1			0
CC	GO:0031012	extracellular matrix	19054	20/2213	0.0105217	0.24726	CsaV3_1G044380/CsaV3_5G037570/CsaV3_5G037640	CsaV3_1G044380/CsaV3_5G037570/CsaV3_5G037640	3
CC	GO:0044421	extracellular region part	19054	20/2213	0.0105217	0.24726	CsaV3_1G044380/CsaV3_5G037570/CsaV3_5G037640	CsaV3_1G044380/CsaV3_5G037570/CsaV3_5G037640	3
CC	GO:0005634	nucleus	15/52	374/2213	0.0210141	0.329221	CsaV3_1G000090/CsaV3_1G030930/CsaV3_1G045520/CsaV3_2G009710/CsaV3_2G009900/CsaV3_4G004700/CsaV3_4G005180/CsaV3_5G001910/CsaV3_5G025710/CsaV3_6G017380/CsaV3_6G021720/CsaV3_6G022470/CsaV3_6G052060/CsaV3_7G005530/CsaV3_7G027600	CsaV3_1G000090/CsaV3_1G030930/CsaV3_1G045520/CsaV3_2G009710/CsaV3_2G009900/CsaV3_4G004700/CsaV3_4G005180/CsaV3_5G001910/CsaV3_5G025710/CsaV3_6G017380/CsaV3_6G021720/CsaV3_6G022470/CsaV3_6G052060/CsaV3_7G005530/CsaV3_7G027600	15
CC	GO:0015629	actin cytoskeleton	19025	13/2213	0.0358028	0.420683	CsaV3_5G029000/CsaV3_6G031920	CsaV3_5G029000/CsaV3_6G031920	2
CC	GO:0005576	extracellular region	19054	47/2213	0.0962934	0.905158	CsaV3_1G044380/CsaV3_5G037570/CsaV3_5G037640	CsaV3_1G044380/CsaV3_5G037570/CsaV3_5G037640	3
CC	GO:0044430	cytoskeletal part	19025	29/2213	0.147248	0.949338	CsaV3_5G029000/CsaV3_6G031920	CsaV3_5G029000/CsaV3_6G031920	2
CC	GO:0005856	cytoskeleton	19025	31/2213	0.163831	0.949338	CsaV3_5G029000/CsaV3_6G031920	CsaV3_5G029000/CsaV3_6G031920	2
CC	GO:0019867	outer membrane	18994	114657	0.248779	0.949338	CsaV3_1G031550	CsaV3_1G031550	1
CC	GO:0009654	photosystem II oxygen evolving complex	18994	16/2213	0.31734	0.949338	CsaV3_3G008130	CsaV3_3G008130	1
CC	GO:0042651	thylakoid membrane	18994	17/2213	0.333498	0.949338	CsaV3_3G008130	CsaV3_3G008130	1
CC	GO:1990204	oxidoreductase complex	18994	17/2213	0.333498	0.949338	CsaV3_3G008130	CsaV3_3G008130	1
CC	GO:0019898	extrinsic component of membrane	18994	20/2213	0.379753	0.949338	CsaV3_3G008130	CsaV3_3G008130	1
CC	GO:0000145	exocyst	18994	22/2213	0.408825	0.949338	CsaV3_5G006610	CsaV3_5G006610	1
CC	GO:0005938	cell cortex	18994	22/2213	0.408825	0.949338	CsaV3_5G006610	CsaV3_5G006610	1
CC	GO:0031966	mitochondrial membrane	18994	22/2213	0.408825	0.949338	CsaV3_1G031550	CsaV3_1G031550	1
CC	GO:0044448	cell cortex part	18994	22/2213	0.408825	0.949338	CsaV3_5G006610	CsaV3_5G006610	1
CC	GO:0099568	cytoplasmic region	18994	22/2213	0.408825	0.949338	CsaV3_5G006610	CsaV3_5G006610	1
CC	GO:0099023	tethering complex	18994	24/2213	0.43656	0.949338	CsaV3_5G006610	CsaV3_5G006610	1
CC	GO:0005740	mitochondrial envelope	18994	25/2213	0.449945	0.949338	CsaV3_1G031550	CsaV3_1G031550	1
CC	GO:0009523	photosystem II	18994	25/2213	0.449945	0.949338	CsaV3_3G008130	CsaV3_3G008130	1
CC	GO:0043228	non-membrane-bounded organelle	19176	282/2213	0.500897	0.949338	CsaV3_1G003570/CsaV3_1G008740/CsaV3_2G030640/CsaV3_5G002400/CsaV3_5G029000/CsaV3_6G031920/CsaV3_7G008490	CsaV3_1G003570/CsaV3_1G008740/CsaV3_2G030640/CsaV3_5G002400/CsaV3_5G029000/CsaV3_6G031920/CsaV3_7G008490	7
CC	GO:0043232	intracellular non-membrane-bounded organelle	19176	282/2213	0.500897	0.949338	CsaV3_1G003570/CsaV3_1G008740/CsaV3_2G030640/CsaV3_5G002400/CsaV3_5G029000/CsaV3_6G031920/CsaV3_7G008490	CsaV3_1G003570/CsaV3_1G008740/CsaV3_2G030640/CsaV3_5G002400/CsaV3_5G029000/CsaV3_6G031920/CsaV3_7G008490	7
CC	GO:0044429	mitochondrial part	18994	30/2213	0.512328	0.949338	CsaV3_1G031550	CsaV3_1G031550	1
CC	GO:0098805	whole membrane	18994	31/2213	0.523945	0.949338	CsaV3_1G031550	CsaV3_1G031550	1
CC	GO:0031967	organelle envelope	18994	34/2213	0.55719	0.949338	CsaV3_1G031550	CsaV3_1G031550	1
CC	GO:0031975	envelope	18994	34/2213	0.55719	0.949338	CsaV3_1G031550	CsaV3_1G031550	1
CC	GO:0098588	bounding membrane of organelle	18994	38/2213	0.597997	0.949338	CsaV3_1G031550	CsaV3_1G031550	1
CC	GO:0009521	photosystem	18994	40/2213	0.616994	0.949338	CsaV3_3G008130	CsaV3_3G008130	1
CC	GO:0009579	thylakoid	18994	41/2213	0.626159	0.949338	CsaV3_3G008130	CsaV3_3G008130	1
CC	GO:0034357	photosynthetic membrane	18994	41/2213	0.626159	0.949338	CsaV3_3G008130	CsaV3_3G008130	1
CC	GO:0044436	thylakoid part	18994	41/2213	0.626159	0.949338	CsaV3_3G008130	CsaV3_3G008130	1
CC	GO:0005694	chromosome	18994	44/2213	0.652384	0.958189	CsaV3_5G002400	CsaV3_5G002400	1
CC	GO:0031090	organelle membrane	18994	52/2213	0.713811	1	CsaV3_1G031550	CsaV3_1G031550	1
CC	GO:0071944	cell periphery	19025	112/2213	0.750273	1	CsaV3_5G000510/CsaV3_5G006610	CsaV3_5G000510/CsaV3_5G006610	2
CC	GO:0005618	cell wall	18994	70/2213	0.815718	1	CsaV3_5G000510	CsaV3_5G000510	1
CC	GO:0030312	external encapsulating structure	18994	70/2213	0.815718	1	CsaV3_5G000510	CsaV3_5G000510	1
CC	GO:0044422	organelle part	19054	202/2213	0.86795	1	CsaV3_1G031550/CsaV3_5G029000/CsaV3_6G031920	CsaV3_1G031550/CsaV3_5G029000/CsaV3_6G031920	3
CC	GO:0044446	intracellular organelle part	19054	202/2213	0.86795	1	CsaV3_1G031550/CsaV3_5G029000/CsaV3_6G031920	CsaV3_1G031550/CsaV3_5G029000/CsaV3_6G031920	3
CC	GO:0005739	mitochondrion	18994	86/2213	0.875782	1	CsaV3_1G031550	CsaV3_1G031550	1
CC	GO:1902494	catalytic complex	18994	102/2213	0.916521	1	CsaV3_3G008130	CsaV3_3G008130	1
CC	GO:0098796	membrane protein complex	18994	132/2213	0.960705	1	CsaV3_3G008130	CsaV3_3G008130	1
CC	GO:0005840	ribosome	18994	198/2213	0.992801	1	CsaV3_7G008490	CsaV3_7G008490	1
CC	GO:0044444	cytoplasmic part	19085	421/2213	0.994043	1	CsaV3_1G009580/CsaV3_1G031550/CsaV3_5G006610/CsaV3_7G008490	CsaV3_1G009580/CsaV3_1G031550/CsaV3_5G006610/CsaV3_7G008490	4
CC	GO:0005737	cytoplasm	19115	497/2213	0.99572	1	CsaV3_1G009580/CsaV3_1G031550/CsaV3_4G003120/CsaV3_5G006610/CsaV3_7G008490	CsaV3_1G009580/CsaV3_1G031550/CsaV3_4G003120/CsaV3_5G006610/CsaV3_7G008490	5
CC	GO:1990904	ribonucleoprotein complex	18994	224/2213	0.996368	1	CsaV3_7G008490	CsaV3_7G008490	1
CC	GO:0005783	endoplasmic reticulum	0/52	33/2213	1	1			0
CC	GO:0012505	endomembrane system	0/52	74/2213	1	1			0
MF	GO:0008324	cation transmembrane transporter activity	9/232	135/9200	0.00705145	0.496892	CsaV3_1G014320/CsaV3_1G032160/CsaV3_2G010040/CsaV3_2G025600/CsaV3_3G010810/CsaV3_3G049640/CsaV3_4G006290/CsaV3_6G013480/CsaV3_7G007720	CsaV3_1G014320/CsaV3_1G032160/CsaV3_2G010040/CsaV3_2G025600/CsaV3_3G010810/CsaV3_3G049640/CsaV3_4G006290/CsaV3_6G013480/CsaV3_7G007720	9
MF	GO:0015075	ion transmembrane transporter activity	12/232	218/9200	0.00912112	0.496892	CsaV3_1G014320/CsaV3_1G032160/CsaV3_2G010040/CsaV3_2G025600/CsaV3_3G010810/CsaV3_3G047190/CsaV3_3G049640/CsaV3_4G006290/CsaV3_4G028730/CsaV3_5G038390/CsaV3_6G013480/CsaV3_7G007720	CsaV3_1G014320/CsaV3_1G032160/CsaV3_2G010040/CsaV3_2G025600/CsaV3_3G010810/CsaV3_3G047190/CsaV3_3G049640/CsaV3_4G006290/CsaV3_4G028730/CsaV3_5G038390/CsaV3_6G013480/CsaV3_7G007720	12
MF	GO:0051287	NAD binding	5/232	55/9200	0.0121998	0.496892	CsaV3_3G025170/CsaV3_6G025210/CsaV3_6G032490/CsaV3_6G032500/CsaV3_6G033570	CsaV3_3G025170/CsaV3_6G025210/CsaV3_6G032490/CsaV3_6G032500/CsaV3_6G033570	5
MF	GO:0020037	heme binding	14/232	299/9200	0.0190963	0.496892	CsaV3_1G008260/CsaV3_2G017840/CsaV3_2G035310/CsaV3_3G016670/CsaV3_3G039990/CsaV3_3G044660/CsaV3_3G044980/CsaV3_4G004610/CsaV3_5G003810/CsaV3_5G015610/CsaV3_6G008980/CsaV3_UNG126970/CsaV3_UNG160170/CsaV3_UNG223560	CsaV3_1G008260/CsaV3_2G017840/CsaV3_2G035310/CsaV3_3G016670/CsaV3_3G039990/CsaV3_3G044660/CsaV3_3G044980/CsaV3_4G004610/CsaV3_5G003810/CsaV3_5G015610/CsaV3_6G008980/CsaV3_UNG126970/CsaV3_UNG160170/CsaV3_UNG223560	14
MF	GO:0046906	tetrapyrrole binding	14/232	303/9200	0.0211504	0.496892	CsaV3_1G008260/CsaV3_2G017840/CsaV3_2G035310/CsaV3_3G016670/CsaV3_3G039990/CsaV3_3G044660/CsaV3_3G044980/CsaV3_4G004610/CsaV3_5G003810/CsaV3_5G015610/CsaV3_6G008980/CsaV3_UNG126970/CsaV3_UNG160170/CsaV3_UNG223560	CsaV3_1G008260/CsaV3_2G017840/CsaV3_2G035310/CsaV3_3G016670/CsaV3_3G039990/CsaV3_3G044660/CsaV3_3G044980/CsaV3_4G004610/CsaV3_5G003810/CsaV3_5G015610/CsaV3_6G008980/CsaV3_UNG126970/CsaV3_UNG160170/CsaV3_UNG223560	14
MF	GO:0004601	peroxidase activity	6/232	99/9200	0.0387911	0.496892	CsaV3_1G008260/CsaV3_3G016670/CsaV3_4G004610/CsaV3_UNG126970/CsaV3_UNG160170/CsaV3_UNG223560	CsaV3_1G008260/CsaV3_3G016670/CsaV3_4G004610/CsaV3_UNG126970/CsaV3_UNG160170/CsaV3_UNG223560	6
MF	GO:0015298	solute:cation antiporter activity	3/232	30/9200	0.0389632	0.496892	CsaV3_2G025600/CsaV3_3G049640/CsaV3_4G006290	CsaV3_2G025600/CsaV3_3G049640/CsaV3_4G006290	3
MF	GO:0015299	solute:proton antiporter activity	3/232	30/9200	0.0389632	0.496892	CsaV3_2G025600/CsaV3_3G049640/CsaV3_4G006290	CsaV3_2G025600/CsaV3_3G049640/CsaV3_4G006290	3
MF	GO:0015297	antiporter activity	5/232	75/9200	0.040538	0.496892	CsaV3_2G008060/CsaV3_2G025600/CsaV3_3G049640/CsaV3_4G006290/CsaV3_5G003220	CsaV3_2G008060/CsaV3_2G025600/CsaV3_3G049640/CsaV3_4G006290/CsaV3_5G003220	5
MF	GO:0022857	transmembrane transporter activity	15/232	363/9200	0.0411911	0.496892	CsaV3_1G014320/CsaV3_1G032160/CsaV3_2G008060/CsaV3_2G010040/CsaV3_2G025600/CsaV3_3G010810/CsaV3_3G047190/CsaV3_3G049640/CsaV3_4G006290/CsaV3_4G028730/CsaV3_5G003220/CsaV3_5G038390/CsaV3_6G013480/CsaV3_6G048430/CsaV3_7G007720	CsaV3_1G014320/CsaV3_1G032160/CsaV3_2G008060/CsaV3_2G010040/CsaV3_2G025600/CsaV3_3G010810/CsaV3_3G047190/CsaV3_3G049640/CsaV3_4G006290/CsaV3_4G028730/CsaV3_5G003220/CsaV3_5G038390/CsaV3_6G013480/CsaV3_6G048430/CsaV3_7G007720	15
MF	GO:0016684	oxidoreductase activity, acting on peroxide as acceptor	6/232	101/9200	0.0421217	0.496892	CsaV3_1G008260/CsaV3_3G016670/CsaV3_4G004610/CsaV3_UNG126970/CsaV3_UNG160170/CsaV3_UNG223560	CsaV3_1G008260/CsaV3_3G016670/CsaV3_4G004610/CsaV3_UNG126970/CsaV3_UNG160170/CsaV3_UNG223560	6
MF	GO:0015291	secondary active transmembrane transporter activity	5/232	79/9200	0.0488915	0.496892	CsaV3_2G008060/CsaV3_2G025600/CsaV3_3G049640/CsaV3_4G006290/CsaV3_5G003220	CsaV3_2G008060/CsaV3_2G025600/CsaV3_3G049640/CsaV3_4G006290/CsaV3_5G003220	5
MF	GO:0016209	antioxidant activity	6/232	105/9200	0.0493099	0.496892	CsaV3_1G008260/CsaV3_3G016670/CsaV3_4G004610/CsaV3_UNG126970/CsaV3_UNG160170/CsaV3_UNG223560	CsaV3_1G008260/CsaV3_3G016670/CsaV3_4G004610/CsaV3_UNG126970/CsaV3_UNG160170/CsaV3_UNG223560	6
MF	GO:0015318	inorganic molecular entity transmembrane transporter activity	9/232	198/9200	0.0630484	0.589953	CsaV3_1G014320/CsaV3_2G025600/CsaV3_3G010810/CsaV3_3G047190/CsaV3_3G049640/CsaV3_4G006290/CsaV3_4G028730/CsaV3_5G038390/CsaV3_7G007720	CsaV3_1G014320/CsaV3_2G025600/CsaV3_3G010810/CsaV3_3G047190/CsaV3_3G049640/CsaV3_4G006290/CsaV3_4G028730/CsaV3_5G038390/CsaV3_7G007720	9
MF	GO:0022890	inorganic cation transmembrane transporter activity	6/232	116/9200	0.0727682	0.635509	CsaV3_1G014320/CsaV3_2G025600/CsaV3_3G010810/CsaV3_3G049640/CsaV3_4G006290/CsaV3_7G007720	CsaV3_1G014320/CsaV3_2G025600/CsaV3_3G010810/CsaV3_3G049640/CsaV3_4G006290/CsaV3_7G007720	6
MF	GO:0016830	carbon-carbon lyase activity	3/232	41/9200	0.0838561	0.683534	CsaV3_3G020560/CsaV3_7G006180/CsaV3_7G021470	CsaV3_3G020560/CsaV3_7G006180/CsaV3_7G021470	3
MF	GO:0004222	metalloendopeptidase activity	3/232	42/9200	0.0887029	0.683534	CsaV3_1G044380/CsaV3_5G037570/CsaV3_5G037640	CsaV3_1G044380/CsaV3_5G037570/CsaV3_5G037640	3
MF	GO:0005215	transporter activity	17/232	479/9200	0.0970235	0.706115	CsaV3_1G007650/CsaV3_1G014320/CsaV3_1G032160/CsaV3_2G008060/CsaV3_2G010040/CsaV3_2G025600/CsaV3_2G034610/CsaV3_3G010810/CsaV3_3G047190/CsaV3_3G049640/CsaV3_4G006290/CsaV3_4G028730/CsaV3_5G003220/CsaV3_5G038390/CsaV3_6G013480/CsaV3_6G048430/CsaV3_7G007720	CsaV3_1G007650/CsaV3_1G014320/CsaV3_1G032160/CsaV3_2G008060/CsaV3_2G010040/CsaV3_2G025600/CsaV3_2G034610/CsaV3_3G010810/CsaV3_3G047190/CsaV3_3G049640/CsaV3_4G006290/CsaV3_4G028730/CsaV3_5G003220/CsaV3_5G038390/CsaV3_6G013480/CsaV3_6G048430/CsaV3_7G007720	17
MF	GO:0005507	copper ion binding	3/232	48/9200	0.120087	0.78211	CsaV3_1G042200/CsaV3_3G034780/CsaV3_3G034810	CsaV3_1G042200/CsaV3_3G034780/CsaV3_3G034810	3
MF	GO:0005506	iron ion binding	9/232	230/9200	0.127389	0.78211	CsaV3_2G017840/CsaV3_2G035310/CsaV3_3G039990/CsaV3_3G044660/CsaV3_3G044980/CsaV3_5G003810/CsaV3_5G015610/CsaV3_6G006560/CsaV3_6G008980	CsaV3_2G017840/CsaV3_2G035310/CsaV3_3G039990/CsaV3_3G044660/CsaV3_3G044980/CsaV3_5G003810/CsaV3_5G015610/CsaV3_6G006560/CsaV3_6G008980	9
MF	GO:0008237	metallopeptidase activity	3/232	50/9200	0.131347	0.78211	CsaV3_1G044380/CsaV3_5G037570/CsaV3_5G037640	CsaV3_1G044380/CsaV3_5G037570/CsaV3_5G037640	3
MF	GO:0046873	metal ion transmembrane transporter activity	3/232	50/9200	0.131347	0.78211	CsaV3_1G014320/CsaV3_3G010810/CsaV3_7G007720	CsaV3_1G014320/CsaV3_3G010810/CsaV3_7G007720	3
MF	GO:0016614	oxidoreductase activity, acting on CH-OH group of donors	6/232	142/9200	0.149219	0.791719	CsaV3_2G001450/CsaV3_3G025170/CsaV3_4G009240/CsaV3_6G032490/CsaV3_6G032500/CsaV3_6G033570	CsaV3_2G001450/CsaV3_3G025170/CsaV3_4G009240/CsaV3_6G032490/CsaV3_6G032500/CsaV3_6G033570	6
MF	GO:0016831	carboxy-lyase activity	2/232	28/9200	0.156409	0.791719	CsaV3_3G020560/CsaV3_7G006180	CsaV3_3G020560/CsaV3_7G006180	2
MF	GO:0016747	transferase activity, transferring acyl groups other than amino-acyl groups	5/232	113/9200	0.156605	0.791719	CsaV3_1G039600/CsaV3_2G035810/CsaV3_3G034110/CsaV3_4G003650/CsaV3_5G030590	CsaV3_1G039600/CsaV3_2G035810/CsaV3_3G034110/CsaV3_4G003650/CsaV3_5G030590	5
MF	GO:0050662	coenzyme binding	10/232	275/9200	0.157135	0.791719	CsaV3_2G001450/CsaV3_3G005800/CsaV3_3G025170/CsaV3_3G041150/CsaV3_4G009240/CsaV3_5G001660/CsaV3_6G025210/CsaV3_6G032490/CsaV3_6G032500/CsaV3_6G033570	CsaV3_2G001450/CsaV3_3G005800/CsaV3_3G025170/CsaV3_3G041150/CsaV3_4G009240/CsaV3_5G001660/CsaV3_6G025210/CsaV3_6G032490/CsaV3_6G032500/CsaV3_6G033570	10
MF	GO:0016746	transferase activity, transferring acyl groups	6/232	149/9200	0.174339	0.826355	CsaV3_1G039600/CsaV3_2G035810/CsaV3_3G034040/CsaV3_3G034110/CsaV3_4G003650/CsaV3_5G030590	CsaV3_1G039600/CsaV3_2G035810/CsaV3_3G034040/CsaV3_3G034110/CsaV3_4G003650/CsaV3_5G030590	6
MF	GO:0016616	oxidoreductase activity, acting on the CH-OH group of donors, NAD or NADP as acceptor	4/232	87/9200	0.176626	0.826355	CsaV3_3G025170/CsaV3_6G032490/CsaV3_6G032500/CsaV3_6G033570	CsaV3_3G025170/CsaV3_6G032490/CsaV3_6G032500/CsaV3_6G033570	4
MF	GO:0022804	active transmembrane transporter activity	5/232	127/9200	0.216983	0.828901	CsaV3_2G008060/CsaV3_2G025600/CsaV3_3G049640/CsaV3_4G006290/CsaV3_5G003220	CsaV3_2G008060/CsaV3_2G025600/CsaV3_3G049640/CsaV3_4G006290/CsaV3_5G003220	5
MF	GO:0052689	carboxylic ester hydrolase activity	3/232	65/9200	0.225213	0.828901	CsaV3_2G031370/CsaV3_3G048550/CsaV3_5G000510	CsaV3_2G031370/CsaV3_3G048550/CsaV3_5G000510	3
MF	GO:0000155	phosphorelay sensor kinase activity	1/232	2666546	0.225498	0.828901	CsaV3_2G009260	CsaV3_2G009260	1
MF	GO:0004673	protein histidine kinase activity	1/232	2666546	0.225498	0.828901	CsaV3_2G009260	CsaV3_2G009260	1
MF	GO:0016775	phosphotransferase activity, nitrogenous group as acceptor	1/232	2666546	0.225498	0.828901	CsaV3_2G009260	CsaV3_2G009260	1
MF	GO:0015078	proton transmembrane transporter activity	3/232	66/9200	0.231902	0.828901	CsaV3_2G025600/CsaV3_3G049640/CsaV3_4G006290	CsaV3_2G025600/CsaV3_3G049640/CsaV3_4G006290	3
MF	GO:0003746	translation elongation factor activity	1/232	2666577	0.24505	0.828901	CsaV3_1G009580	CsaV3_1G009580	1
MF	GO:0016655	oxidoreductase activity, acting on NAD(P)H, quinone or similar compound as acceptor	1/232	2666577	0.24505	0.828901	CsaV3_UNG208560	CsaV3_UNG208560	1
MF	GO:0016705	oxidoreductase activity, acting on paired donors, with incorporation or reduction of molecular oxygen	8/232	238/9200	0.252603	0.828901	CsaV3_2G017840/CsaV3_2G035310/CsaV3_3G039990/CsaV3_3G044660/CsaV3_3G044980/CsaV3_5G003810/CsaV3_5G015610/CsaV3_6G008980	CsaV3_2G017840/CsaV3_2G035310/CsaV3_3G039990/CsaV3_3G044660/CsaV3_3G044980/CsaV3_5G003810/CsaV3_5G015610/CsaV3_6G008980	8
MF	GO:0019842	vitamin binding	3/232	70/9200	0.258993	0.828901	CsaV3_3G041150/CsaV3_5G001660/CsaV3_7G029140	CsaV3_3G041150/CsaV3_5G001660/CsaV3_7G029140	3
MF	GO:0016645	oxidoreductase activity, acting on the CH-NH group of donors	1/232	2666607	0.264111	0.828901	CsaV3_2G001450	CsaV3_2G001450	1
MF	GO:0044877	protein-containing complex binding	1/232	13/9200	0.282692	0.828901	CsaV3_6G017380	CsaV3_6G017380	1
MF	GO:1901681	sulfur compound binding	1/232	13/9200	0.282692	0.828901	CsaV3_7G029140	CsaV3_7G029140	1
MF	GO:0016651	oxidoreductase activity, acting on NAD(P)H	2/232	42/9200	0.28627	0.828901	CsaV3_6G025210/CsaV3_UNG208560	CsaV3_6G025210/CsaV3_UNG208560	2
MF	GO:0015238	drug transmembrane transporter activity	2/232	45/9200	0.314398	0.828901	CsaV3_2G008060/CsaV3_5G003220	CsaV3_2G008060/CsaV3_5G003220	2
MF	GO:0003682	chromatin binding	1/232	15/9200	0.318465	0.828901	CsaV3_6G017380	CsaV3_6G017380	1
MF	GO:0008080	N-acetyltransferase activity	1/232	15/9200	0.318465	0.828901	CsaV3_1G039600	CsaV3_1G039600	1
MF	GO:0015116	sulfate transmembrane transporter activity	1/232	15/9200	0.318465	0.828901	CsaV3_4G028730	CsaV3_4G028730	1
MF	GO:1901682	sulfur compound transmembrane transporter activity	1/232	15/9200	0.318465	0.828901	CsaV3_4G028730	CsaV3_4G028730	1
MF	GO:0015077	monovalent inorganic cation transmembrane transporter activity	3/232	81/9200	0.335008	0.828901	CsaV3_2G025600/CsaV3_3G049640/CsaV3_4G006290	CsaV3_2G025600/CsaV3_3G049640/CsaV3_4G006290	3
MF	GO:0016410	N-acyltransferase activity	1/232	16/9200	0.33568	0.828901	CsaV3_1G039600	CsaV3_1G039600	1
MF	GO:0004470	malic enzyme activity	1/232	17/9200	0.352461	0.828901	CsaV3_3G025170	CsaV3_3G025170	1
MF	GO:0004471	malate dehydrogenase (decarboxylating) (NAD+) activity	1/232	17/9200	0.352461	0.828901	CsaV3_3G025170	CsaV3_3G025170	1
MF	GO:0016615	malate dehydrogenase activity	1/232	17/9200	0.352461	0.828901	CsaV3_3G025170	CsaV3_3G025170	1
MF	GO:0048038	quinone binding	1/232	17/9200	0.352461	0.828901	CsaV3_6G025210	CsaV3_6G025210	1
MF	GO:0005216	ion channel activity	2/232	50/9200	0.360667	0.828901	CsaV3_3G047190/CsaV3_5G038390	CsaV3_3G047190/CsaV3_5G038390	2
MF	GO:0015267	channel activity	2/232	50/9200	0.360667	0.828901	CsaV3_3G047190/CsaV3_5G038390	CsaV3_3G047190/CsaV3_5G038390	2
MF	GO:0022803	passive transmembrane transporter activity	2/232	50/9200	0.360667	0.828901	CsaV3_3G047190/CsaV3_5G038390	CsaV3_3G047190/CsaV3_5G038390	2
MF	GO:0022838	substrate-specific channel activity	2/232	50/9200	0.360667	0.828901	CsaV3_3G047190/CsaV3_5G038390	CsaV3_3G047190/CsaV3_5G038390	2
MF	GO:0016407	acetyltransferase activity	1/232	18/9200	0.368821	0.833026	CsaV3_1G039600	CsaV3_1G039600	1
MF	GO:0003774	motor activity	2/232	54/9200	0.396844	0.870437	CsaV3_5G029000/CsaV3_6G031920	CsaV3_5G029000/CsaV3_6G031920	2
MF	GO:0008171	O-methyltransferase activity	1/232	22/9200	0.430245	0.870437	CsaV3_7G008590	CsaV3_7G008590	1
MF	GO:0009982	pseudouridine synthase activity	1/232	22/9200	0.430245	0.870437	CsaV3_1G004580	CsaV3_1G004580	1
MF	GO:0030695	GTPase regulator activity	1/232	22/9200	0.430245	0.870437	CsaV3_4G003120	CsaV3_4G003120	1
MF	GO:0030170	pyridoxal phosphate binding	2/232	58/9200	0.432057	0.870437	CsaV3_3G041150/CsaV3_5G001660	CsaV3_3G041150/CsaV3_5G001660	2
MF	GO:0070279	vitamin B6 binding	2/232	58/9200	0.432057	0.870437	CsaV3_3G041150/CsaV3_5G001660	CsaV3_3G041150/CsaV3_5G001660	2
MF	GO:0005509	calcium ion binding	4/232	134/9200	0.438707	0.870437	CsaV3_1G011690/CsaV3_3G008130/CsaV3_6G008990/CsaV3_7G006180	CsaV3_1G011690/CsaV3_3G008130/CsaV3_6G008990/CsaV3_7G006180	4
MF	GO:0008289	lipid binding	2/232	61/9200	0.457739	0.870437	CsaV3_5G010610/CsaV3_6G005790	CsaV3_5G010610/CsaV3_6G005790	2
MF	GO:0140101	catalytic activity, acting on a tRNA	2/232	62/9200	0.466151	0.870437	CsaV3_2G031370/CsaV3_3G048550	CsaV3_2G031370/CsaV3_3G048550	2
MF	GO:0015103	inorganic anion transmembrane transporter activity	1/232	26/9200	0.485714	0.870437	CsaV3_4G028730	CsaV3_4G028730	1
MF	GO:0016765	transferase activity, transferring alkyl or aryl (other than methyl) groups	1/232	26/9200	0.485714	0.870437	CsaV3_6G039940	CsaV3_6G039940	1
MF	GO:0016627	oxidoreductase activity, acting on the CH-CH group of donors	1/232	27/9200	0.49872	0.870437	CsaV3_2G003300	CsaV3_2G003300	1
MF	GO:0060589	nucleoside-triphosphatase regulator activity	1/232	27/9200	0.49872	0.870437	CsaV3_4G003120	CsaV3_4G003120	1
MF	GO:0005543	phospholipid binding	1/232	28/9200	0.511398	0.870437	CsaV3_5G010610	CsaV3_5G010610	1
MF	GO:0042578	phosphoric ester hydrolase activity	2/232	69/9200	0.522794	0.870437	CsaV3_5G035080/CsaV3_6G022770	CsaV3_5G035080/CsaV3_6G022770	2
MF	GO:0000988	transcription factor activity, protein binding	1/232	29/9200	0.523757	0.870437	CsaV3_3G021990	CsaV3_3G021990	1
MF	GO:0001883	purine nucleoside binding	4/232	150/9200	0.5263	0.870437	CsaV3_4G003850/CsaV3_5G012490/CsaV3_6G008600/CsaV3_7G010050	CsaV3_4G003850/CsaV3_5G012490/CsaV3_6G008600/CsaV3_7G010050	4
MF	GO:0005525	GTP binding	4/232	150/9200	0.5263	0.870437	CsaV3_4G003850/CsaV3_5G012490/CsaV3_6G008600/CsaV3_7G010050	CsaV3_4G003850/CsaV3_5G012490/CsaV3_6G008600/CsaV3_7G010050	4
MF	GO:0032549	ribonucleoside binding	4/232	150/9200	0.5263	0.870437	CsaV3_4G003850/CsaV3_5G012490/CsaV3_6G008600/CsaV3_7G010050	CsaV3_4G003850/CsaV3_5G012490/CsaV3_6G008600/CsaV3_7G010050	4
MF	GO:0032550	purine ribonucleoside binding	4/232	150/9200	0.5263	0.870437	CsaV3_4G003850/CsaV3_5G012490/CsaV3_6G008600/CsaV3_7G010050	CsaV3_4G003850/CsaV3_5G012490/CsaV3_6G008600/CsaV3_7G010050	4
MF	GO:0032561	guanyl ribonucleotide binding	4/232	150/9200	0.5263	0.870437	CsaV3_4G003850/CsaV3_5G012490/CsaV3_6G008600/CsaV3_7G010050	CsaV3_4G003850/CsaV3_5G012490/CsaV3_6G008600/CsaV3_7G010050	4
MF	GO:0001882	nucleoside binding	4/232	151/9200	0.531565	0.870437	CsaV3_4G003850/CsaV3_5G012490/CsaV3_6G008600/CsaV3_7G010050	CsaV3_4G003850/CsaV3_5G012490/CsaV3_6G008600/CsaV3_7G010050	4
MF	GO:0019001	guanyl nucleotide binding	4/232	155/9200	0.552331	0.893032	CsaV3_4G003850/CsaV3_5G012490/CsaV3_6G008600/CsaV3_7G010050	CsaV3_4G003850/CsaV3_5G012490/CsaV3_6G008600/CsaV3_7G010050	4
MF	GO:0016866	intramolecular transferase activity	1/232	32/9200	0.558997	0.893032	CsaV3_1G004580	CsaV3_1G004580	1
MF	GO:0016829	lyase activity	3/232	122/9200	0.598287	0.91707	CsaV3_3G020560/CsaV3_7G006180/CsaV3_7G021470	CsaV3_3G020560/CsaV3_7G006180/CsaV3_7G021470	3
MF	GO:0038023	signaling receptor activity	1/232	36/9200	0.601977	0.91707	CsaV3_2G009260	CsaV3_2G009260	1
MF	GO:0060089	molecular transducer activity	1/232	36/9200	0.601977	0.91707	CsaV3_2G009260	CsaV3_2G009260	1
MF	GO:0045735	nutrient reservoir activity	1/232	37/9200	0.612053	0.91707	CsaV3_6G046100	CsaV3_6G046100	1
MF	GO:0008270	zinc ion binding	8/232	335/9200	0.613536	0.91707	CsaV3_1G012850/CsaV3_1G044380/CsaV3_2G001940/CsaV3_5G037570/CsaV3_5G037640/CsaV3_7G000270/CsaV3_7G008070/CsaV3_7G028020	CsaV3_1G012850/CsaV3_1G044380/CsaV3_2G001940/CsaV3_5G037570/CsaV3_5G037640/CsaV3_7G000270/CsaV3_7G008070/CsaV3_7G028020	8
MF	GO:0004175	endopeptidase activity	3/232	127/9200	0.625571	0.91707	CsaV3_1G044380/CsaV3_5G037570/CsaV3_5G037640	CsaV3_1G044380/CsaV3_5G037570/CsaV3_5G037640	3
MF	GO:0008509	anion transmembrane transporter activity	1/232	39/9200	0.631451	0.91707	CsaV3_4G028730	CsaV3_4G028730	1
MF	GO:0008135	translation factor activity, RNA binding	1/232	40/9200	0.640784	0.91707	CsaV3_1G009580	CsaV3_1G009580	1
MF	GO:0003899	DNA-directed 5'-3' RNA polymerase activity	1/232	41/9200	0.649882	0.91707	CsaV3_4G005180	CsaV3_4G005180	1
MF	GO:0016791	phosphatase activity	1/232	45/9200	0.684037	0.91707	CsaV3_5G035080	CsaV3_5G035080	1
MF	GO:0046983	protein dimerization activity	6/232	271/9200	0.68437	0.91707	CsaV3_1G006280/CsaV3_1G037910/CsaV3_2G005070/CsaV3_4G034980/CsaV3_6G017150/CsaV3_6G037990	CsaV3_1G006280/CsaV3_1G037910/CsaV3_2G005070/CsaV3_4G034980/CsaV3_6G017150/CsaV3_6G037990	6
MF	GO:0030599	pectinesterase activity	1/232	46/9200	0.692044	0.91707	CsaV3_5G000510	CsaV3_5G000510	1
MF	GO:0008168	methyltransferase activity	3/232	142/9200	0.699635	0.91707	CsaV3_4G005540/CsaV3_6G008610/CsaV3_7G008590	CsaV3_4G005540/CsaV3_6G008610/CsaV3_7G008590	3
MF	GO:0034062	5'-3' RNA polymerase activity	1/232	47/9200	0.699848	0.91707	CsaV3_4G005180	CsaV3_4G005180	1
MF	GO:0097747	RNA polymerase activity	1/232	47/9200	0.699848	0.91707	CsaV3_4G005180	CsaV3_4G005180	1
MF	GO:0050660	flavin adenine dinucleotide binding	2/232	97/9200	0.706976	0.91707	CsaV3_2G001450/CsaV3_4G009240	CsaV3_2G001450/CsaV3_4G009240	2
MF	GO:0016853	isomerase activity	2/232	100/9200	0.722733	0.91707	CsaV3_1G002220/CsaV3_1G004580	CsaV3_1G002220/CsaV3_1G004580	2
MF	GO:0003723	RNA binding	5/232	239/9200	0.725492	0.91707	CsaV3_1G004580/CsaV3_1G009580/CsaV3_2G008740/CsaV3_5G008260/CsaV3_6G008530	CsaV3_1G004580/CsaV3_1G009580/CsaV3_2G008740/CsaV3_5G008260/CsaV3_6G008530	5
MF	GO:0140098	catalytic activity, acting on RNA	3/232	148/9200	0.725982	0.91707	CsaV3_2G031370/CsaV3_3G048550/CsaV3_4G005180	CsaV3_2G031370/CsaV3_3G048550/CsaV3_4G005180	3
MF	GO:0016741	transferase activity, transferring one-carbon groups	3/232	149/9200	0.730193	0.91707	CsaV3_4G005540/CsaV3_6G008610/CsaV3_7G008590	CsaV3_4G005540/CsaV3_6G008610/CsaV3_7G008590	3
[truncated: 29 more rows]

## Sheet: MEdark_red GO enrichment
Category	GOID	Description	GeneRatio	BgRatio	pvalue	padj	geneID	geneName	Count
[truncated: 181 more rows]

## Sheet: METan_GO Enrichment
Category	GOID	Description	GeneRatio	BgRatio	pvalue	padj	geneID	geneName	Count
[truncated: 380 more rows]
