# Supplementary material for: Transcriptomic and Physiological Analyses Reveal Potential Genes Involved in Photoperiod-Regulated β-Carotene Accumulation Mechanisms in the Endocarp of Cucumber (Cucumis sativus L.) Fruit
Source: Int J Mol Sci. 2022 Oct 21;23(20):12650. doi: 10.3390/ijms232012650 (PMC9604348; doi:10.3390/ijms232012650)
Supplement: Supplementary file 1 [file ijms-23-12650-s001.zip › Supplementary Datasheet S9_KEGG Enrichment in the Turquoise Module for Module-Phenotype Co-expression.xls]

## Sheet: METurquoise -Module -trait rel.
	S12	KEGG ENRICHMENT IN THE Turquoise Module for Module-Phenotype Co-expression
KEGGID	Description	GeneRatio	BgRatio	pvalue	padj	geneID	geneName	keggID	Count
csv04136	Autophagy - other	9/567	22/3919	0.00222577	0.240383	CsaV3_1G039890/CsaV3_6G008300/CsaV3_6G042980/CsaV3_6G041860/CsaV3_3G043520/CsaV3_3G034550/CsaV3_3G018020/CsaV3_5G037660/CsaV3_6G050860	CsaV3_1G039890/CsaV3_6G008300/CsaV3_6G042980/CsaV3_6G041860/CsaV3_3G043520/CsaV3_3G034550/CsaV3_3G018020/CsaV3_5G037660/CsaV3_6G050860	csv:101221823/csv:101215834/csv:101219883/csv:101221089/csv:101214589/csv:101221608/csv:101205497/csv:101208902/csv:101215499	9
csv00770	Pantothenate and CoA biosynthesis	8/567	24/3919	0.0158842	0.55442	CsaV3_2G025820/CsaV3_7G025860/CsaV3_6G038890/CsaV3_1G000550/CsaV3_3G014460/CsaV3_5G035390/CsaV3_6G003860/CsaV3_1G044260	CsaV3_2G025820/CsaV3_7G025860/CsaV3_6G038890/CsaV3_1G000550/CsaV3_3G014460/CsaV3_5G035390/CsaV3_6G003860/CsaV3_1G044260	csv:101214004/csv:101207725/csv:101204944/csv:101213339/csv:101222371/csv:101204676/csv:101203236/csv:101208212	8
csv00592	alpha-Linolenic acid metabolism	16/567	67/3919	0.0263338	0.55442	CsaV3_3G011240/CsaV3_6G023910/CsaV3_5G017240/CsaV3_7G027160/CsaV3_4G023930/CsaV3_2G011380/CsaV3_1G046370/CsaV3_3G000680/CsaV3_6G023960/CsaV3_4G027880/CsaV3_6G025310/CsaV3_2G010330/CsaV3_4G004730/CsaV3_6G025240/CsaV3_6G024060/CsaV3_7G010170	CsaV3_3G011240/CsaV3_6G023910/CsaV3_5G017240/CsaV3_7G027160/CsaV3_4G023930/CsaV3_2G011380/CsaV3_1G046370/CsaV3_3G000680/CsaV3_6G023960/CsaV3_4G027880/CsaV3_6G025310/CsaV3_2G010330/CsaV3_4G004730/CsaV3_6G025240/CsaV3_6G024060/CsaV3_7G010170	csv:101217710/csv:101218899/csv:101209722/csv:101222906/csv:101209041/csv:101212301/csv:101219898/csv:101211109/csv:101218899/csv:101220288/csv:101218899/csv:101218290/csv:101218159/csv:101218899/csv:101218899/csv:101211574	16
csv00280	Valine, leucine and isoleucine degradation	12/567	47/3919	0.0314678	0.55442	CsaV3_2G025820/CsaV3_3G011240/CsaV3_3G010140/CsaV3_7G027810/CsaV3_1G037300/CsaV3_6G041570/CsaV3_1G043650/CsaV3_4G026970/CsaV3_2G011380/CsaV3_4G028150/CsaV3_6G000070/CsaV3_2G004110	CsaV3_2G025820/CsaV3_3G011240/CsaV3_3G010140/CsaV3_7G027810/CsaV3_1G037300/CsaV3_6G041570/CsaV3_1G043650/CsaV3_4G026970/CsaV3_2G011380/CsaV3_4G028150/CsaV3_6G000070/CsaV3_2G004110	csv:101214004/csv:101217710/csv:101221427/csv:101221786/csv:101210819/csv:101205130/csv:101222552/csv:101210304/csv:101212301/csv:101219329/csv:101207718/csv:101202756	12
csv00564	Glycerophospholipid metabolism	18/567	80/3919	0.0338128	0.55442	CsaV3_6G009150/CsaV3_4G036540/CsaV3_1G008920/CsaV3_5G033710/CsaV3_1G046370/CsaV3_4G002900/CsaV3_6G036660/CsaV3_4G027880/CsaV3_6G048540/CsaV3_5G006440/CsaV3_1G043430/CsaV3_1G013550/CsaV3_2G010330/CsaV3_6G012360/CsaV3_1G006010/CsaV3_2G031870/CsaV3_6G002500/CsaV3_UNG147150	CsaV3_6G009150/CsaV3_4G036540/CsaV3_1G008920/CsaV3_5G033710/CsaV3_1G046370/CsaV3_4G002900/CsaV3_6G036660/CsaV3_4G027880/CsaV3_6G048540/CsaV3_5G006440/CsaV3_1G043430/CsaV3_1G013550/CsaV3_2G010330/CsaV3_6G012360/CsaV3_1G006010/CsaV3_2G031870/CsaV3_6G002500/CsaV3_UNG147150	csv:101204532/csv:101213538/csv:101207870/csv:101207886/csv:101219898/csv:101216924/csv:101210759/csv:101220288/csv:101205782/csv:101221229/csv:101218054/csv:101220610/csv:101218290/csv:101210099/csv:101222932/csv:101218992/csv:101212778/csv:101206945	18
csv03013	RNA transport	25/567	123/3919	0.0448429	0.55442	CsaV3_7G027560/CsaV3_7G023140/CsaV3_1G024130/CsaV3_7G003030/CsaV3_6G038690/CsaV3_6G052590/CsaV3_2G036160/CsaV3_1G037250/CsaV3_3G041940/CsaV3_7G035380/CsaV3_4G004840/CsaV3_3G020960/CsaV3_5G003280/CsaV3_2G010940/CsaV3_5G040380/CsaV3_6G004880/CsaV3_4G009280/CsaV3_4G006310/CsaV3_5G039870/CsaV3_3G002080/CsaV3_7G008460/CsaV3_1G044360/CsaV3_5G010080/CsaV3_4G009380/CsaV3_4G006470	CsaV3_7G027560/CsaV3_7G023140/CsaV3_1G024130/CsaV3_7G003030/CsaV3_6G038690/CsaV3_6G052590/CsaV3_2G036160/CsaV3_1G037250/CsaV3_3G041940/CsaV3_7G035380/CsaV3_4G004840/CsaV3_3G020960/CsaV3_5G003280/CsaV3_2G010940/CsaV3_5G040380/CsaV3_6G004880/CsaV3_4G009280/CsaV3_4G006310/CsaV3_5G039870/CsaV3_3G002080/CsaV3_7G008460/CsaV3_1G044360/CsaV3_5G010080/CsaV3_4G009380/CsaV3_4G006470	csv:101217528/csv:101216510/csv:101210714/csv:101207840/csv:101222392/csv:101208923/csv:101222187/csv:101215735/csv:101220930/csv:101212870/csv:101213308/csv:101222898/csv:101205107/csv:101202754/csv:101208317/csv:101219081/csv:101217101/csv:101208103/csv:101203561/csv:101214107/csv:101223017/csv:101205181/csv:101216348/csv:101222187/csv:101204248	25
csv00600	Sphingolipid metabolism	6/567	19/3919	0.0457083	0.55442	CsaV3_2G010670/CsaV3_2G011410/CsaV3_6G008140/CsaV3_3G043840/CsaV3_3G013580/CsaV3_5G032610	CsaV3_2G010670/CsaV3_2G011410/CsaV3_6G008140/CsaV3_3G043840/CsaV3_3G013580/CsaV3_5G032610	csv:101203795/csv:101213022/csv:101217975/csv:101204972/csv:101208848/csv:101206018	6
csv00760	Nicotinate and nicotinamide metabolism	6/567	19/3919	0.0457083	0.55442	CsaV3_1G008930/CsaV3_3G043750/CsaV3_2G002690/CsaV3_5G027390/CsaV3_2G019560/CsaV3_6G034080	CsaV3_1G008930/CsaV3_3G043750/CsaV3_2G002690/CsaV3_5G027390/CsaV3_2G019560/CsaV3_6G034080	csv:101208114/csv:101203747/csv:101203635/csv:101205815/csv:101212335/csv:101204002	6
csv00630	Glyoxylate and dicarboxylate metabolism	15/567	66/3919	0.0462016	0.55442	CsaV3_1G043170/CsaV3_6G044520/CsaV3_6G015630/CsaV3_4G007440/CsaV3_3G007460/CsaV3_4G028640/CsaV3_5G002930/CsaV3_4G037250/CsaV3_1G002350/CsaV3_UNG203690/CsaV3_6G000070/CsaV3_3G043780/CsaV3_5G004640/CsaV3_UNG209280/CsaV3_7G001060	CsaV3_1G043170/CsaV3_6G044520/CsaV3_6G015630/CsaV3_4G007440/CsaV3_3G007460/CsaV3_4G028640/CsaV3_5G002930/CsaV3_4G037250/CsaV3_1G002350/CsaV3_UNG203690/CsaV3_6G000070/CsaV3_3G043780/CsaV3_5G004640/CsaV3_UNG209280/CsaV3_7G001060	csv:101217893/csv:101219252/csv:101209376/csv:101212892/csv:101221189/csv:101215287/csv:101220920/csv:101202931/csv:101213903/csv:3429289/csv:101207718/csv:101204237/csv:101220634/csv:3429289/csv:101209132	15
csv00730	Thiamine metabolism	6/567	20/3919	0.0576074	0.62216	CsaV3_5G006390/CsaV3_2G031800/CsaV3_3G006930/CsaV3_6G004680/CsaV3_2G003460/CsaV3_3G005340	CsaV3_5G006390/CsaV3_2G031800/CsaV3_3G006930/CsaV3_6G004680/CsaV3_2G003460/CsaV3_3G005340	csv:101221935/csv:101220427/csv:101218190/csv:101215517/csv:101203230/csv:101211553	6
csv00590	Arachidonic acid metabolism	4/567	3919-12-01	0.0824836	0.803317	CsaV3_4G036450/CsaV3_4G027880/CsaV3_5G002900/CsaV3_1G000030	CsaV3_4G036450/CsaV3_4G027880/CsaV3_5G002900/CsaV3_1G000030	csv:101211107/csv:101220288/csv:101220688/csv:101205654	4
csv00071	Fatty acid degradation	12/567	55/3919	0.0903508	0.803317	CsaV3_3G011240/CsaV3_7G002420/CsaV3_6G023910/CsaV3_2G011380/CsaV3_4G028150/CsaV3_3G013480/CsaV3_6G023960/CsaV3_6G025310/CsaV3_4G004730/CsaV3_2G004110/CsaV3_6G025240/CsaV3_6G024060	CsaV3_3G011240/CsaV3_7G002420/CsaV3_6G023910/CsaV3_2G011380/CsaV3_4G028150/CsaV3_3G013480/CsaV3_6G023960/CsaV3_6G025310/CsaV3_4G004730/CsaV3_2G004110/CsaV3_6G025240/CsaV3_6G024060	csv:101217710/csv:101212158/csv:101218899/csv:101212301/csv:101219329/csv:101207461/csv:101218899/csv:101218899/csv:101218159/csv:101202756/csv:101218899/csv:101218899	12
csv04146	Peroxisome	15/567	73/3919	0.0966956	0.803317	CsaV3_7G004280/CsaV3_3G011240/CsaV3_1G043170/CsaV3_7G002420/CsaV3_2G002690/CsaV3_2G004490/CsaV3_4G002910/CsaV3_2G011380/CsaV3_2G002230/CsaV3_3G013480/CsaV3_3G039850/CsaV3_4G037250/CsaV3_4G000460/CsaV3_4G004730/CsaV3_6G037870	CsaV3_7G004280/CsaV3_3G011240/CsaV3_1G043170/CsaV3_7G002420/CsaV3_2G002690/CsaV3_2G004490/CsaV3_4G002910/CsaV3_2G011380/CsaV3_2G002230/CsaV3_3G013480/CsaV3_3G039850/CsaV3_4G037250/CsaV3_4G000460/CsaV3_4G004730/CsaV3_6G037870	csv:101214701/csv:101217710/csv:101217893/csv:101212158/csv:101203635/csv:101216556/csv:101216694/csv:101212301/csv:101208626/csv:101207461/csv:101215097/csv:101202931/csv:101210878/csv:101218159/csv:101211500	15
csv00710	Carbon fixation in photosynthetic organisms	15/567	76/3919	0.126042	0.862349	CsaV3_5G035850/CsaV3_6G044520/CsaV3_7G005670/CsaV3_4G025880/CsaV3_1G005660/CsaV3_5G008880/CsaV3_7G006840/CsaV3_3G007460/CsaV3_3G001220/CsaV3_1G002350/CsaV3_UNG203690/CsaV3_3G030440/CsaV3_UNG082650/CsaV3_2G015280/CsaV3_UNG209280	CsaV3_5G035850/CsaV3_6G044520/CsaV3_7G005670/CsaV3_4G025880/CsaV3_1G005660/CsaV3_5G008880/CsaV3_7G006840/CsaV3_3G007460/CsaV3_3G001220/CsaV3_1G002350/CsaV3_UNG203690/CsaV3_3G030440/CsaV3_UNG082650/CsaV3_2G015280/CsaV3_UNG209280	csv:101211170/csv:101219252/csv:101208202/csv:101211927/csv:101219871/csv:101209723/csv:101206118/csv:101221189/csv:101208330/csv:101213903/csv:3429289/csv:101220055/csv:101212275/csv:101204323/csv:3429289	15
csv04712	Circadian rhythm - plant	7/567	30/3919	0.131913	0.862349	CsaV3_6G043900/CsaV3_6G008360/CsaV3_6G015450/CsaV3_6G005020/CsaV3_4G024430/CsaV3_5G014370/CsaV3_2G007370	CsaV3_6G043900/CsaV3_6G008360/CsaV3_6G015450/CsaV3_6G005020/CsaV3_4G024430/CsaV3_5G014370/CsaV3_2G007370	csv:101207095/csv:101214878/csv:101210608/csv:101220984/csv:101210765/csv:101222712/csv:101216738	7
csv01212	Fatty acid metabolism	12/567	60/3919	0.148681	0.862349	CsaV3_3G011240/CsaV3_7G002420/CsaV3_6G023910/CsaV3_3G002510/CsaV3_2G011380/CsaV3_3G013480/CsaV3_6G023960/CsaV3_2G010260/CsaV3_6G025310/CsaV3_4G004730/CsaV3_6G025240/CsaV3_6G024060	CsaV3_3G011240/CsaV3_7G002420/CsaV3_6G023910/CsaV3_3G002510/CsaV3_2G011380/CsaV3_3G013480/CsaV3_6G023960/CsaV3_2G010260/CsaV3_6G025310/CsaV3_4G004730/CsaV3_6G025240/CsaV3_6G024060	csv:101217710/csv:101212158/csv:101218899/csv:101212007/csv:101212301/csv:101207461/csv:101218899/csv:101217109/csv:101218899/csv:101218159/csv:101218899/csv:101218899	12
csv00670	One carbon pool by folate	4/567	15/3919	0.160885	0.862349	CsaV3_4G007440/CsaV3_4G028640/CsaV3_1G001940/CsaV3_2G014940	CsaV3_4G007440/CsaV3_4G028640/CsaV3_1G001940/CsaV3_2G014940	csv:101212892/csv:101215287/csv:101211739/csv:101208660	4
csv00905	Brassinosteroid biosynthesis	4/567	15/3919	0.160885	0.862349	CsaV3_3G034190/CsaV3_7G034850/CsaV3_2G002660/CsaV3_4G005090	CsaV3_3G034190/CsaV3_7G034850/CsaV3_2G002660/CsaV3_4G005090	csv:101217020/csv:101217830/csv:101208789/csv:101211854	4
csv03040	Spliceosome	23/567	129/3919	0.163852	0.862349	CsaV3_6G036200/CsaV3_5G024370/CsaV3_7G024760/CsaV3_3G040470/CsaV3_4G021980/CsaV3_1G038750/CsaV3_1G014490/CsaV3_2G011210/CsaV3_4G032850/CsaV3_4G004840/CsaV3_3G020960/CsaV3_7G024630/CsaV3_3G043910/CsaV3_4G035260/CsaV3_3G042620/CsaV3_4G009030/CsaV3_UNG186430/CsaV3_6G040490/CsaV3_7G031820/CsaV3_3G038490/CsaV3_3G015880/CsaV3_3G042630/CsaV3_5G007990	CsaV3_6G036200/CsaV3_5G024370/CsaV3_7G024760/CsaV3_3G040470/CsaV3_4G021980/CsaV3_1G038750/CsaV3_1G014490/CsaV3_2G011210/CsaV3_4G032850/CsaV3_4G004840/CsaV3_3G020960/CsaV3_7G024630/CsaV3_3G043910/CsaV3_4G035260/CsaV3_3G042620/CsaV3_4G009030/CsaV3_UNG186430/CsaV3_6G040490/CsaV3_7G031820/CsaV3_3G038490/CsaV3_3G015880/CsaV3_3G042630/CsaV3_5G007990	csv:101207521/csv:101211337/csv:101212307/csv:101203374/csv:101219553/csv:101223011/csv:101221685/csv:101210094/csv:101204969/csv:101213308/csv:101222898/csv:101203991/csv:101206160/csv:101203479/csv:101215674/csv:101205561/csv:101213550/csv:101209779/csv:101216056/csv:101216466/csv:101211027/csv:101215674/csv:101221788	23
csv00400	Phenylalanine, tyrosine and tryptophan biosynthesis	8/567	39/3919	0.193142	0.862349	CsaV3_5G038370/CsaV3_2G034880/CsaV3_7G024070/CsaV3_4G033420/CsaV3_6G048980/CsaV3_4G036570/CsaV3_1G014500/CsaV3_2G029790	CsaV3_5G038370/CsaV3_2G034880/CsaV3_7G024070/CsaV3_4G033420/CsaV3_6G048980/CsaV3_4G036570/CsaV3_1G014500/CsaV3_2G029790	csv:101203315/csv:101217625/csv:101214429/csv:101212407/csv:101209833/csv:101213051/csv:101221912/csv:101220636	8
csv00240	Pyrimidine metabolism	9/567	45/3919	0.193971	0.862349	CsaV3_3G043750/CsaV3_5G033670/CsaV3_4G001780/CsaV3_6G038890/CsaV3_3G020520/CsaV3_2G014940/CsaV3_4G006620/CsaV3_1G043140/CsaV3_1G003160	CsaV3_3G043750/CsaV3_5G033670/CsaV3_4G001780/CsaV3_6G038890/CsaV3_3G020520/CsaV3_2G014940/CsaV3_4G006620/CsaV3_1G043140/CsaV3_1G003160	csv:101203747/csv:101208611/csv:101212270/csv:101204944/csv:101207261/csv:101208660/csv:101210301/csv:101217190/csv:101210506	9
csv00410	beta-Alanine metabolism	9/567	45/3919	0.193971	0.862349	CsaV3_3G010140/CsaV3_1G037300/CsaV3_1G043650/CsaV3_4G007490/CsaV3_4G028150/CsaV3_6G038890/CsaV3_7G030830/CsaV3_4G004730/CsaV3_2G004110	CsaV3_3G010140/CsaV3_1G037300/CsaV3_1G043650/CsaV3_4G007490/CsaV3_4G028150/CsaV3_6G038890/CsaV3_7G030830/CsaV3_4G004730/CsaV3_2G004110	csv:101221427/csv:101210819/csv:101222552/csv:101213852/csv:101219329/csv:101204944/csv:101209263/csv:101218159/csv:101202756	9
csv00565	Ether lipid metabolism	5/567	22/3919	0.203687	0.862349	CsaV3_4G036540/CsaV3_5G033710/CsaV3_4G027880/CsaV3_1G043430/CsaV3_1G013550	CsaV3_4G036540/CsaV3_5G033710/CsaV3_4G027880/CsaV3_1G043430/CsaV3_1G013550	csv:101213538/csv:101207886/csv:101220288/csv:101218054/csv:101220610	5
csv00906	Carotenoid biosynthesis	6/567	28/3919	0.209719	0.862349	CsaV3_1G045650/CsaV3_3G017450/CsaV3_6G051790/CsaV3_4G002690/CsaV3_4G007760/CsaV3_2G027780	CsaV3_1G045650/CsaV3_3G017450/CsaV3_6G051790/CsaV3_4G002690/CsaV3_4G007760/CsaV3_2G027780	csv:101210522/csv:101212140/csv:101214535/csv:101209155/csv:101219505/csv:101220320	6
csv00380	Tryptophan metabolism	7/567	34/3919	0.212386	0.862349	CsaV3_7G028260/CsaV3_4G028150/CsaV3_1G039030/CsaV3_4G037250/CsaV3_1G039020/CsaV3_6G000070/CsaV3_2G004110	CsaV3_7G028260/CsaV3_4G028150/CsaV3_1G039030/CsaV3_4G037250/CsaV3_1G039020/CsaV3_6G000070/CsaV3_2G004110	csv:101222503/csv:101219329/csv:101209418/csv:101202931/csv:101209171/csv:101207718/csv:101202756	7
csv00270	Cysteine and methionine metabolism	17/567	96/3919	0.217445	0.862349	CsaV3_2G025820/CsaV3_4G028410/CsaV3_6G044520/CsaV3_4G026970/CsaV3_1G041170/CsaV3_6G037780/CsaV3_2G007310/CsaV3_2G013400/CsaV3_3G007460/CsaV3_4G033420/CsaV3_6G000890/CsaV3_2G013530/CsaV3_7G018620/CsaV3_6G015400/CsaV3_UNG210440/CsaV3_1G002350/CsaV3_1G040170	CsaV3_2G025820/CsaV3_4G028410/CsaV3_6G044520/CsaV3_4G026970/CsaV3_1G041170/CsaV3_6G037780/CsaV3_2G007310/CsaV3_2G013400/CsaV3_3G007460/CsaV3_4G033420/CsaV3_6G000890/CsaV3_2G013530/CsaV3_7G018620/CsaV3_6G015400/CsaV3_UNG210440/CsaV3_1G002350/CsaV3_1G040170	csv:101214004/csv:101217124/csv:101219252/csv:101210304/csv:101210526/csv:101209525/csv:101221312/csv:101204622/csv:101221189/csv:101212407/csv:101211475/csv:101222725/csv:101213467/csv:101221653/csv:101217331/csv:101213903/csv:101217331	17
csv00290	Valine, leucine and isoleucine biosynthesis	4/567	17/3919	0.223658	0.862349	CsaV3_2G025820/CsaV3_3G049730/CsaV3_1G000550/CsaV3_1G044260	CsaV3_2G025820/CsaV3_3G049730/CsaV3_1G000550/CsaV3_1G044260	csv:101214004/csv:101212173/csv:101213339/csv:101208212	4
csv00100	Steroid biosynthesis	5/567	23/3919	0.231557	0.862349	CsaV3_4G027880/CsaV3_3G036770/CsaV3_3G027160/CsaV3_3G032010/CsaV3_7G008200	CsaV3_4G027880/CsaV3_3G036770/CsaV3_3G027160/CsaV3_3G032010/CsaV3_7G008200	csv:101220288/csv:101207322/csv:101217446/csv:101217151/csv:101220653	5
csv00310	Lysine degradation	5/567	23/3919	0.231557	0.862349	CsaV3_1G041440/CsaV3_4G028150/CsaV3_6G000070/CsaV3_2G004110/CsaV3_6G002600	CsaV3_1G041440/CsaV3_4G028150/CsaV3_6G000070/CsaV3_2G004110/CsaV3_6G002600	csv:101214976/csv:101219329/csv:101207718/csv:101202756/csv:101212299	5
csv00030	Pentose phosphate pathway	9/567	48/3919	0.251363	0.86777	CsaV3_3G002000/CsaV3_4G004200/CsaV3_5G005340/CsaV3_4G025880/CsaV3_1G005660/CsaV3_7G006840/CsaV3_2G015280/CsaV3_3G023460/CsaV3_2G003650	CsaV3_3G002000/CsaV3_4G004200/CsaV3_5G005340/CsaV3_4G025880/CsaV3_1G005660/CsaV3_7G006840/CsaV3_2G015280/CsaV3_3G023460/CsaV3_2G003650	csv:101216517/csv:101204973/csv:101216892/csv:101211927/csv:101219871/csv:101206118/csv:101204323/csv:101220704/csv:101208699	9
csv00563	Glycosylphosphatidylinositol (GPI)-anchor biosynthesis	4/567	18/3919	0.257117	0.86777	CsaV3_1G037410/CsaV3_4G022060/CsaV3_3G001560/CsaV3_3G000210	CsaV3_1G037410/CsaV3_4G022060/CsaV3_3G001560/CsaV3_3G000210	csv:101216463/csv:101216602/csv:101206318/csv:101204797	4
csv01040	Biosynthesis of unsaturated fatty acids	4/567	18/3919	0.257117	0.86777	CsaV3_3G011240/CsaV3_2G011380/CsaV3_2G010260/CsaV3_4G004730	CsaV3_3G011240/CsaV3_2G011380/CsaV3_2G010260/CsaV3_4G004730	csv:101217710/csv:101212301/csv:101217109/csv:101218159	4
csv00053	Ascorbate and aldarate metabolism	9/567	49/3919	0.271652	0.878842	CsaV3_5G006680/CsaV3_7G000930/CsaV3_5G027310/CsaV3_4G028150/CsaV3_1G017100/CsaV3_1G042210/CsaV3_5G027030/CsaV3_2G004110/CsaV3_6G034020	CsaV3_5G006680/CsaV3_7G000930/CsaV3_5G027310/CsaV3_4G028150/CsaV3_1G017100/CsaV3_1G042210/CsaV3_5G027030/CsaV3_2G004110/CsaV3_6G034020	csv:101203666/csv:101206941/csv:101203883/csv:101219329/csv:101217972/csv:101215231/csv:101220205/csv:101202756/csv:101202798	9
csv00230	Purine metabolism	14/567	81/3919	0.276672	0.878842	CsaV3_5G006390/CsaV3_3G002000/CsaV3_4G000980/CsaV3_1G008920/CsaV3_3G043750/CsaV3_2G015340/CsaV3_5G004020/CsaV3_4G000040/CsaV3_6G004680/CsaV3_2G003460/CsaV3_6G049150/CsaV3_3G043250/CsaV3_4G006620/CsaV3_3G012550	CsaV3_5G006390/CsaV3_3G002000/CsaV3_4G000980/CsaV3_1G008920/CsaV3_3G043750/CsaV3_2G015340/CsaV3_5G004020/CsaV3_4G000040/CsaV3_6G004680/CsaV3_2G003460/CsaV3_6G049150/CsaV3_3G043250/CsaV3_4G006620/CsaV3_3G012550	csv:101221935/csv:101216517/csv:101213396/csv:101207870/csv:101203747/csv:101203840/csv:101216186/csv:101220786/csv:101215517/csv:101203230/csv:101217089/csv:101204776/csv:101210301/csv:101216373	14
csv00195	Photosynthesis	9/567	51/3919	0.313544	0.967507	CsaV3_7G004050/CsaV3_2G032160/CsaV3_4G007520/CsaV3_UNG207830/CsaV3_3G019220/CsaV3_4G026390/CsaV3_UNG207960/CsaV3_UNG207970/CsaV3_UNG203710	CsaV3_7G004050/CsaV3_2G032160/CsaV3_4G007520/CsaV3_UNG207830/CsaV3_3G019220/CsaV3_4G026390/CsaV3_UNG207960/CsaV3_UNG207970/CsaV3_UNG203710	csv:101221828/csv:101215909/csv:101214094/csv:3429379/csv:101204479/csv:3429278/csv:3429279/csv:3429276/csv:3429376	9
csv04144	Endocytosis	20/567	127/3919	0.376557	0.999974	CsaV3_6G052350/CsaV3_6G036650/CsaV3_6G049840/CsaV3_1G006690/CsaV3_3G036470/CsaV3_5G029500/CsaV3_7G024760/CsaV3_4G030940/CsaV3_6G013060/CsaV3_2G011210/CsaV3_5G024830/CsaV3_6G022530/CsaV3_3G001280/CsaV3_7G030260/CsaV3_2G011130/CsaV3_6G002880/CsaV3_7G033340/CsaV3_3G036240/CsaV3_3G018320/CsaV3_4G002260	CsaV3_6G052350/CsaV3_6G036650/CsaV3_6G049840/CsaV3_1G006690/CsaV3_3G036470/CsaV3_5G029500/CsaV3_7G024760/CsaV3_4G030940/CsaV3_6G013060/CsaV3_2G011210/CsaV3_5G024830/CsaV3_6G022530/CsaV3_3G001280/CsaV3_7G030260/CsaV3_2G011130/CsaV3_6G002880/CsaV3_7G033340/CsaV3_3G036240/CsaV3_3G018320/CsaV3_4G002260	csv:101218116/csv:101217735/csv:101210407/csv:101214704/csv:101204280/csv:101209957/csv:101212307/csv:101203042/csv:101206370/csv:101210094/csv:101215531/csv:101209152/csv:101207111/csv:101217563/csv:101204204/csv:101208940/csv:101221144/csv:101203066/csv:101220748/csv:101203435	20
csv04120	Ubiquitin mediated proteolysis	11/567	68/3919	0.394462	0.999974	CsaV3_6G031140/CsaV3_5G031430/CsaV3_3G041550/CsaV3_3G046770/CsaV3_6G015450/CsaV3_2G026140/CsaV3_3G019890/CsaV3_6G016240/CsaV3_6G026310/CsaV3_2G016050/CsaV3_3G030120	CsaV3_6G031140/CsaV3_5G031430/CsaV3_3G041550/CsaV3_3G046770/CsaV3_6G015450/CsaV3_2G026140/CsaV3_3G019890/CsaV3_6G016240/CsaV3_6G026310/CsaV3_2G016050/CsaV3_3G030120	csv:101220292/csv:101218512/csv:101204239/csv:101203062/csv:101210608/csv:101209203/csv:101215696/csv:101212319/csv:101218340/csv:101218793/csv:101215457	11
csv03020	RNA polymerase	7/567	42/3919	0.406602	0.999974	CsaV3_7G035230/CsaV3_4G004060/CsaV3_2G032780/CsaV3_3G019080/CsaV3_UNG208340/CsaV3_1G012790/CsaV3_1G035860	CsaV3_7G035230/CsaV3_4G004060/CsaV3_2G032780/CsaV3_3G019080/CsaV3_UNG208340/CsaV3_1G012790/CsaV3_1G035860	csv:101204777/csv:101207602/csv:101206603/csv:3429301/csv:3429302/csv:101214828/csv:101212403	7
csv00340	Histidine metabolism	3/567	16/3919	0.414291	0.999974	CsaV3_7G024070/CsaV3_4G028150/CsaV3_2G004110	CsaV3_7G024070/CsaV3_4G028150/CsaV3_2G004110	csv:101214429/csv:101219329/csv:101202756	3
csv00900	Terpenoid backbone biosynthesis	7/567	43/3919	0.431818	0.999974	CsaV3_2G031800/CsaV3_3G006930/CsaV3_4G030380/CsaV3_7G023860/CsaV3_3G042430/CsaV3_2G017600/CsaV3_6G042470	CsaV3_2G031800/CsaV3_3G006930/CsaV3_4G030380/CsaV3_7G023860/CsaV3_3G042430/CsaV3_2G017600/CsaV3_6G042470	csv:101220427/csv:101218190/csv:101215055/csv:101217388/csv:101213752/csv:101209799/csv:101203974	7
csv00970	Aminoacyl-tRNA biosynthesis	8/567	50/3919	0.438726	0.999974	CsaV3_3G018830/CsaV3_1G039910/CsaV3_4G036250/CsaV3_7G026620/CsaV3_2G016280/CsaV3_2G008510/CsaV3_3G002710/CsaV3_3G020830	CsaV3_3G018830/CsaV3_1G039910/CsaV3_4G036250/CsaV3_7G026620/CsaV3_2G016280/CsaV3_2G008510/CsaV3_3G002710/CsaV3_3G020830	csv:101217773/csv:101222059/csv:101211267/csv:101216192/csv:101222339/csv:101204394/csv:101220532/csv:101207263	8
csv04016	MAPK signaling pathway - plant	19/567	125/3919	0.446059	0.999974	CsaV3_6G032360/CsaV3_2G004370/CsaV3_2G016430/CsaV3_6G045260/CsaV3_1G042580/CsaV3_7G008840/CsaV3_6G051540/CsaV3_6G000890/CsaV3_3G043720/CsaV3_6G005320/CsaV3_7G021970/CsaV3_4G037250/CsaV3_7G026460/CsaV3_3G027970/CsaV3_1G034580/CsaV3_3G016530/CsaV3_2G009260/CsaV3_4G006620/CsaV3_3G022370	CsaV3_6G032360/CsaV3_2G004370/CsaV3_2G016430/CsaV3_6G045260/CsaV3_1G042580/CsaV3_7G008840/CsaV3_6G051540/CsaV3_6G000890/CsaV3_3G043720/CsaV3_6G005320/CsaV3_7G021970/CsaV3_4G037250/CsaV3_7G026460/CsaV3_3G027970/CsaV3_1G034580/CsaV3_3G016530/CsaV3_2G009260/CsaV3_4G006620/CsaV3_3G022370	csv:101204301/csv:101218843/csv:101214276/csv:101206218/csv:101210347/csv:101209176/csv:101215973/csv:101211475/csv:101203499/csv:101215277/csv:101205426/csv:101202931/csv:101223223/csv:101214188/csv:101206871/csv:101206634/csv:101213479/csv:101210301/csv:101220325	19
csv00640	Propanoate metabolism	6/567	37/3919	0.450583	0.999974	CsaV3_3G010140/CsaV3_1G037300/CsaV3_6G041570/CsaV3_1G043650/CsaV3_6G000070/CsaV3_4G004730	CsaV3_3G010140/CsaV3_1G037300/CsaV3_6G041570/CsaV3_1G043650/CsaV3_6G000070/CsaV3_4G004730	csv:101221427/csv:101210819/csv:101205130/csv:101222552/csv:101207718/csv:101218159	6
csv00650	Butanoate metabolism	4/567	24/3919	0.465521	0.999974	CsaV3_3G019500/CsaV3_1G000550/CsaV3_3G043780/CsaV3_1G044260	CsaV3_3G019500/CsaV3_1G000550/CsaV3_3G043780/CsaV3_1G044260	csv:101221475/csv:101213339/csv:101204237/csv:101208212	4
csv00790	Folate biosynthesis	4/567	25/3919	0.498939	0.999974	CsaV3_2G014940/CsaV3_5G036360/CsaV3_3G040860/CsaV3_1G000030	CsaV3_2G014940/CsaV3_5G036360/CsaV3_3G040860/CsaV3_1G000030	csv:101208660/csv:101222404/csv:101208053/csv:101205654	4
csv00531	Glycosaminoglycan degradation	2/567	3919-12-01	0.535826	0.999974	CsaV3_3G043450/CsaV3_3G043840	CsaV3_3G043450/CsaV3_3G043840	csv:101208875/csv:101204972	2
csv04933	AGE-RAGE signaling pathway in diabetic complications	2/567	3919-12-01	0.535826	0.999974	CsaV3_2G016070/CsaV3_1G045750	CsaV3_2G016070/CsaV3_1G045750	csv:101219263/csv:101208639	2
csv03015	mRNA surveillance pathway	13/567	90/3919	0.549298	0.999974	CsaV3_6G001450/CsaV3_6G009370/CsaV3_1G006980/CsaV3_3G028220/CsaV3_4G004840/CsaV3_3G020960/CsaV3_5G040380/CsaV3_6G004880/CsaV3_3G002080/CsaV3_7G008460/CsaV3_2G025230/CsaV3_2G009800/CsaV3_6G001220	CsaV3_6G001450/CsaV3_6G009370/CsaV3_1G006980/CsaV3_3G028220/CsaV3_4G004840/CsaV3_3G020960/CsaV3_5G040380/CsaV3_6G004880/CsaV3_3G002080/CsaV3_7G008460/CsaV3_2G025230/CsaV3_2G009800/CsaV3_6G001220	csv:101209602/csv:101222391/csv:101217340/csv:101203355/csv:101213308/csv:101222898/csv:101208317/csv:101219081/csv:101214107/csv:101223017/csv:101203485/csv:101207208/csv:101213904	13
csv01200	Carbon metabolism	35/567	245/3919	0.562972	0.999974	CsaV3_1G043170/CsaV3_3G010140/CsaV3_5G035850/CsaV3_3G019500/CsaV3_3G002000/CsaV3_1G037300/CsaV3_4G004200/CsaV3_6G044520/CsaV3_1G043650/CsaV3_7G005670/CsaV3_6G015630/CsaV3_5G005340/CsaV3_4G025880/CsaV3_1G005660/CsaV3_5G008880/CsaV3_4G007440/CsaV3_7G006840/CsaV3_3G007460/CsaV3_4G028640/CsaV3_3G001220/CsaV3_7G018620/CsaV3_4G000040/CsaV3_4G037250/CsaV3_1G002350/CsaV3_UNG203690/CsaV3_3G030440/CsaV3_6G…	CsaV3_1G043170/CsaV3_3G010140/CsaV3_5G035850/CsaV3_3G019500/CsaV3_3G002000/CsaV3_1G037300/CsaV3_4G004200/CsaV3_6G044520/CsaV3_1G043650/CsaV3_7G005670/CsaV3_6G015630/CsaV3_5G005340/CsaV3_4G025880/CsaV3_1G005660/CsaV3_5G008880/CsaV3_4G007440/CsaV3_7G006840/CsaV3_3G007460/CsaV3_4G028640/CsaV3_3G001220/CsaV3_7G018620/CsaV3_4G000040/CsaV3_4G037250/CsaV3_1G002350/CsaV3_UNG203690/CsaV3_3G030440/CsaV3_6G…	csv:101217893/csv:101221427/csv:101211170/csv:101221475/csv:101216517/csv:101210819/csv:101204973/csv:101219252/csv:101222552/csv:101208202/csv:101209376/csv:101216892/csv:101211927/csv:101219871/csv:101209723/csv:101212892/csv:101206118/csv:101221189/csv:101215287/csv:101208330/csv:101213467/csv:101220786/csv:101202931/csv:101213903/csv:3429289/csv:101220055/csv:101207718/csv:101212275/csv:10120…	35
csv04070	Phosphatidylinositol signaling system	8/567	56/3919	0.574219	0.999974	CsaV3_6G009150/CsaV3_1G017100/CsaV3_3G033610/CsaV3_7G021690/CsaV3_6G048540/CsaV3_7G023410/CsaV3_3G036240/CsaV3_6G012360	CsaV3_6G009150/CsaV3_1G017100/CsaV3_3G033610/CsaV3_7G021690/CsaV3_6G048540/CsaV3_7G023410/CsaV3_3G036240/CsaV3_6G012360	csv:101204532/csv:101217972/csv:101208692/csv:101202759/csv:101205782/csv:101215702/csv:101203066/csv:101210099	8
csv00052	Galactose metabolism	6/567	44/3919	0.628426	0.999974	CsaV3_4G004200/CsaV3_4G006660/CsaV3_3G043840/CsaV3_3G023460/CsaV3_1G015730/CsaV3_6G034020	CsaV3_4G004200/CsaV3_4G006660/CsaV3_3G043840/CsaV3_3G023460/CsaV3_1G015730/CsaV3_6G034020	csv:101204973/csv:101209558/csv:101204972/csv:101220704/csv:101215109/csv:101202798	6
csv00360	Phenylalanine metabolism	5/567	37/3919	0.637407	0.999974	CsaV3_3G019500/CsaV3_7G024070/CsaV3_4G033420/CsaV3_1G039030/CsaV3_1G039020	CsaV3_3G019500/CsaV3_7G024070/CsaV3_4G033420/CsaV3_1G039030/CsaV3_1G039020	csv:101221475/csv:101214429/csv:101212407/csv:101209418/csv:101209171	5
csv00750	Vitamin B6 metabolism	2/567	15/3919	0.661208	0.999974	CsaV3_3G021680/CsaV3_1G040240	CsaV3_3G021680/CsaV3_1G040240	csv:101205462/csv:101207641	2
csv03018	RNA degradation	9/567	68/3919	0.667396	0.999974	CsaV3_4G004200/CsaV3_4G031760/CsaV3_1G035960/CsaV3_7G024630/CsaV3_6G004880/CsaV3_4G012100/CsaV3_4G007530/CsaV3_7G008460/CsaV3_3G023460	CsaV3_4G004200/CsaV3_4G031760/CsaV3_1G035960/CsaV3_7G024630/CsaV3_6G004880/CsaV3_4G012100/CsaV3_4G007530/CsaV3_7G008460/CsaV3_3G023460	csv:101204973/csv:101218707/csv:101205451/csv:101203991/csv:101219081/csv:101222268/csv:101221870/csv:101223017/csv:101220704	9
csv04145	Phagosome	8/567	62/3919	0.692726	0.999974	CsaV3_6G036650/CsaV3_4G025920/CsaV3_2G016070/CsaV3_7G021690/CsaV3_7G033340/CsaV3_4G000060/CsaV3_2G029310/CsaV3_1G045750	CsaV3_6G036650/CsaV3_4G025920/CsaV3_2G016070/CsaV3_7G021690/CsaV3_7G033340/CsaV3_4G000060/CsaV3_2G029310/CsaV3_1G045750	csv:101217735/csv:101210703/csv:101219263/csv:101202759/csv:101221144/csv:101221020/csv:101209079/csv:101208639	8
csv00511	Other glycan degradation	2/567	16/3919	0.696482	0.999974	CsaV3_2G011410/CsaV3_3G043840	CsaV3_2G011410/CsaV3_3G043840	csv:101213022/csv:101204972	2
csv00061	Fatty acid biosynthesis	4/567	32/3919	0.70074	0.999974	CsaV3_7G002420/CsaV3_3G013480/CsaV3_7G026160/CsaV3_2G010260	CsaV3_7G002420/CsaV3_3G013480/CsaV3_7G026160/CsaV3_2G010260	csv:101212158/csv:101207461/csv:101221530/csv:101217109	4
csv00620	Pyruvate metabolism	11/567	85/3919	0.70373	0.999974	CsaV3_5G035850/CsaV3_6G044520/CsaV3_7G005670/CsaV3_6G048970/CsaV3_3G007460/CsaV3_4G028150/CsaV3_4G000040/CsaV3_1G002350/CsaV3_6G000070/CsaV3_UNG082650/CsaV3_2G004110	CsaV3_5G035850/CsaV3_6G044520/CsaV3_7G005670/CsaV3_6G048970/CsaV3_3G007460/CsaV3_4G028150/CsaV3_4G000040/CsaV3_1G002350/CsaV3_6G000070/CsaV3_UNG082650/CsaV3_2G004110	csv:101211170/csv:101219252/csv:101208202/csv:101220097/csv:101221189/csv:101219329/csv:101220786/csv:101213903/csv:101207718/csv:101212275/csv:101202756	11
csv04141	Protein processing in endoplasmic reticulum	15/567	115/3919	0.710394	0.999974	CsaV3_1G046080/CsaV3_7G029920/CsaV3_3G017480/CsaV3_7G024760/CsaV3_6G048860/CsaV3_2G032800/CsaV3_2G011210/CsaV3_3G012670/CsaV3_3G041940/CsaV3_2G015300/CsaV3_7G035380/CsaV3_4G025150/CsaV3_7G004390/CsaV3_3G019150/CsaV3_3G030120	CsaV3_1G046080/CsaV3_7G029920/CsaV3_3G017480/CsaV3_7G024760/CsaV3_6G048860/CsaV3_2G032800/CsaV3_2G011210/CsaV3_3G012670/CsaV3_3G041940/CsaV3_2G015300/CsaV3_7G035380/CsaV3_4G025150/CsaV3_7G004390/CsaV3_3G019150/CsaV3_3G030120	csv:101215462/csv:101221276/csv:101210914/csv:101212307/csv:101221743/csv:101206127/csv:101210094/csv:101216851/csv:101220930/csv:101204569/csv:101212870/csv:101211667/csv:101206023/csv:101212004/csv:101215457	15
csv00561	Glycerolipid metabolism	6/567	48/3919	0.713478	0.999974	CsaV3_4G028150/CsaV3_4G027880/CsaV3_4G025310/CsaV3_6G001960/CsaV3_6G012360/CsaV3_2G004110	CsaV3_4G028150/CsaV3_4G027880/CsaV3_4G025310/CsaV3_6G001960/CsaV3_6G012360/CsaV3_2G004110	csv:101219329/csv:101220288/csv:101210436/csv:101221986/csv:101210099/csv:101202756	6
csv00510	N-Glycan biosynthesis	4/567	33/3919	0.724191	0.999974	CsaV3_6G006720/CsaV3_5G027050/CsaV3_UNG023130/CsaV3_1G030420	CsaV3_6G006720/CsaV3_5G027050/CsaV3_UNG023130/CsaV3_1G030420	csv:101219615/csv:101220682/csv:101216914/csv:101216914	4
csv03022	Basal transcription factors	4/567	33/3919	0.724191	0.999974	CsaV3_1G003600/CsaV3_3G049350/CsaV3_4G006050/CsaV3_2G029190	CsaV3_1G003600/CsaV3_3G049350/CsaV3_4G006050/CsaV3_2G029190	csv:101214868/csv:101206316/csv:101211845/csv:101210064	4
csv00330	Arginine and proline metabolism	6/567	49/3919	0.732507	0.999974	CsaV3_4G007490/CsaV3_4G028150/CsaV3_1G039030/CsaV3_7G030830/CsaV3_1G039020/CsaV3_2G004110	CsaV3_4G007490/CsaV3_4G028150/CsaV3_1G039030/CsaV3_7G030830/CsaV3_1G039020/CsaV3_2G004110	csv:101213852/csv:101219329/csv:101209418/csv:101209263/csv:101209171/csv:101202756	6
csv00960	Tropane, piperidine and pyridine alkaloid biosynthesis	2/567	18/3919	0.7579	0.999974	CsaV3_7G024070/CsaV3_4G033420	CsaV3_7G024070/CsaV3_4G033420	csv:101214429/csv:101212407	2
csv00480	Glutathione metabolism	9/567	74/3919	0.763636	0.999974	CsaV3_4G036450/CsaV3_4G007720/CsaV3_5G006680/CsaV3_7G000930/CsaV3_5G006450/CsaV3_3G015450/CsaV3_3G035360/CsaV3_5G002900/CsaV3_3G011460	CsaV3_4G036450/CsaV3_4G007720/CsaV3_5G006680/CsaV3_7G000930/CsaV3_5G006450/CsaV3_3G015450/CsaV3_3G035360/CsaV3_5G002900/CsaV3_3G011460	csv:101211107/csv:101218083/csv:101203666/csv:101206941/csv:101220995/csv:101203261/csv:101210504/csv:101220688/csv:101207634	9
csv00130	Ubiquinone and other terpenoid-quinone biosynthesis	5/567	43/3919	0.76636	0.999974	CsaV3_2G008500/CsaV3_2G024810/CsaV3_4G033420/CsaV3_1G031500/CsaV3_1G012970	CsaV3_2G008500/CsaV3_2G024810/CsaV3_4G033420/CsaV3_1G031500/CsaV3_1G012970	csv:101221791/csv:101208642/csv:101212407/csv:101218077/csv:101222437	5
csv00062	Fatty acid elongation	2/567	20/3919	0.808273	0.999974	CsaV3_3G002510/CsaV3_3G016500	CsaV3_3G002510/CsaV3_3G016500	csv:101212007/csv:101215063	2
csv00250	Alanine, aspartate and glutamate metabolism	6/567	54/3919	0.814156	0.999974	CsaV3_1G043170/CsaV3_3G044050/CsaV3_4G026970/CsaV3_2G015340/CsaV3_5G027390/CsaV3_6G031950	CsaV3_1G043170/CsaV3_3G044050/CsaV3_4G026970/CsaV3_2G015340/CsaV3_5G027390/CsaV3_6G031950	csv:101217893/csv:101207765/csv:101210304/csv:101203840/csv:101205815/csv:101210280	6
csv03008	Ribosome biogenesis in eukaryotes	9/567	79/3919	0.827407	0.999974	CsaV3_6G043900/CsaV3_6G022650/CsaV3_4G009280/CsaV3_1G038920/CsaV3_5G005970/CsaV3_4G004170/CsaV3_4G006310/CsaV3_UNG134030/CsaV3_1G039600	CsaV3_6G043900/CsaV3_6G022650/CsaV3_4G009280/CsaV3_1G038920/CsaV3_5G005970/CsaV3_4G004170/CsaV3_4G006310/CsaV3_UNG134030/CsaV3_1G039600	csv:101207095/csv:101213788/csv:101217101/csv:101207707/csv:101206527/csv:101214572/csv:101208103/csv:101217384/csv:101217092	9
csv00460	Cyanoamino acid metabolism	6/567	55/3919	0.827881	0.999974	CsaV3_1G015110/CsaV3_4G007440/CsaV3_4G028640/CsaV3_3G022670/CsaV3_3G043060/CsaV3_7G033870	CsaV3_1G015110/CsaV3_4G007440/CsaV3_4G028640/CsaV3_3G022670/CsaV3_3G043060/CsaV3_7G033870	csv:101209360/csv:101212892/csv:101215287/csv:101217315/csv:101223112/csv:101214723	6
csv00591	Linoleic acid metabolism	3/567	30/3919	0.83063	0.999974	CsaV3_7G027160/CsaV3_4G023930/CsaV3_4G027880	CsaV3_7G027160/CsaV3_4G023930/CsaV3_4G027880	csv:101222906/csv:101209041/csv:101220288	3
csv00562	Inositol phosphate metabolism	7/567	65/3919	0.850389	0.999974	CsaV3_1G017100/CsaV3_3G033610/CsaV3_7G021690/CsaV3_7G023410/CsaV3_1G043430/CsaV3_3G036240/CsaV3_7G034100	CsaV3_1G017100/CsaV3_3G033610/CsaV3_7G021690/CsaV3_7G023410/CsaV3_1G043430/CsaV3_3G036240/CsaV3_7G034100	csv:101217972/csv:101208692/csv:101202759/csv:101215702/csv:101218054/csv:101203066/csv:101213518	7
csv00860	Porphyrin and chlorophyll metabolism	4/567	40/3919	0.851139	0.999974	CsaV3_1G014120/CsaV3_6G034450/CsaV3_5G027220/CsaV3_2G016730	CsaV3_1G014120/CsaV3_6G034450/CsaV3_5G027220/CsaV3_2G016730	csv:101217499/csv:101205768/csv:101223042/csv:101202861	4
csv03410	Base excision repair	3/567	32/3919	0.862361	0.999974	CsaV3_5G037160/CsaV3_7G029320/CsaV3_4G003300	CsaV3_5G037160/CsaV3_7G029320/CsaV3_4G003300	csv:101211755/csv:101207394/csv:101212347	3
csv00908	Zeatin biosynthesis	2/567	23/3919	0.866393	0.999974	CsaV3_3G040790/CsaV3_1G014570	CsaV3_3G040790/CsaV3_1G014570	csv:101217722/csv:101202758	2
csv00020	Citrate cycle (TCA cycle)	5/567	50/3919	0.869127	0.999974	CsaV3_6G044520/CsaV3_6G015630/CsaV3_3G007460/CsaV3_1G002350/CsaV3_6G000070	CsaV3_6G044520/CsaV3_6G015630/CsaV3_3G007460/CsaV3_1G002350/CsaV3_6G000070	csv:101219252/csv:101209376/csv:101221189/csv:101213903/csv:101207718	5
csv01210	2-Oxocarboxylic acid metabolism	5/567	50/3919	0.869127	0.999974	CsaV3_2G025820/CsaV3_6G015630/CsaV3_3G049730/CsaV3_1G000550/CsaV3_1G044260	CsaV3_2G025820/CsaV3_6G015630/CsaV3_3G049730/CsaV3_1G000550/CsaV3_1G044260	csv:101214004/csv:101209376/csv:101212173/csv:101213339/csv:101208212	5
csv00740	Riboflavin metabolism	1/567	13/3919	0.86932	0.999974	CsaV3_5G029010	CsaV3_5G029010	csv:101215305	1
csv00051	Fructose and mannose metabolism	5/567	51/3919	0.880137	0.999974	CsaV3_4G004200/CsaV3_4G025880/CsaV3_7G006840/CsaV3_2G015280/CsaV3_3G023460	CsaV3_4G004200/CsaV3_4G025880/CsaV3_7G006840/CsaV3_2G015280/CsaV3_3G023460	csv:101204973/csv:101211927/csv:101206118/csv:101204323/csv:101220704	5
csv00010	Glycolysis / Gluconeogenesis	13/567	117/3919	0.884213	0.999974	CsaV3_4G004200/CsaV3_4G025880/CsaV3_7G006840/CsaV3_4G028150/CsaV3_4G000040/CsaV3_3G033550/CsaV3_4G025310/CsaV3_6G000070/CsaV3_2G015280/CsaV3_3G023460/CsaV3_2G004110/CsaV3_2G003650/CsaV3_2G008560	CsaV3_4G004200/CsaV3_4G025880/CsaV3_7G006840/CsaV3_4G028150/CsaV3_4G000040/CsaV3_3G033550/CsaV3_4G025310/CsaV3_6G000070/CsaV3_2G015280/CsaV3_3G023460/CsaV3_2G004110/CsaV3_2G003650/CsaV3_2G008560	csv:101204973/csv:101211927/csv:101206118/csv:101219329/csv:101220786/csv:101207963/csv:101210436/csv:101207718/csv:101204323/csv:101220704/csv:101202756/csv:101208699/csv:101220852	13
csv04075	Plant hormone signal transduction	22/567	192/3919	0.909969	0.999974	CsaV3_6G009450/CsaV3_6G032360/CsaV3_1G041950/CsaV3_6G035810/CsaV3_6G045260/CsaV3_1G042580/CsaV3_7G008840/CsaV3_3G043720/CsaV3_3G027970/CsaV3_1G034580/CsaV3_2G015590/CsaV3_3G016530/CsaV3_1G014770/CsaV3_3G007730/CsaV3_2G009260/CsaV3_3G045690/CsaV3_3G022370/CsaV3_1G045520/CsaV3_7G000570/CsaV3_3G014010/CsaV3_2G007370/CsaV3_6G042190	CsaV3_6G009450/CsaV3_6G032360/CsaV3_1G041950/CsaV3_6G035810/CsaV3_6G045260/CsaV3_1G042580/CsaV3_7G008840/CsaV3_3G043720/CsaV3_3G027970/CsaV3_1G034580/CsaV3_2G015590/CsaV3_3G016530/CsaV3_1G014770/CsaV3_3G007730/CsaV3_2G009260/CsaV3_3G045690/CsaV3_3G022370/CsaV3_1G045520/CsaV3_7G000570/CsaV3_3G014010/CsaV3_2G007370/CsaV3_6G042190	csv:101221294/csv:101204301/csv:101222720/csv:101213210/csv:101206218/csv:101210347/csv:101209176/csv:101203499/csv:101214188/csv:101206871/csv:105434422/csv:101206634/csv:101204604/csv:101204264/csv:101213479/csv:101216825/csv:101220325/csv:101212477/csv:101203330/csv:101215807/csv:101216738/csv:101209118	22
csv00513	Various types of N-glycan biosynthesis	2/567	28/3919	0.928548	0.999974	CsaV3_6G004710/CsaV3_7G008560	CsaV3_6G004710/CsaV3_7G008560	csv:101216230/csv:101205170	2
csv00920	Sulfur metabolism	2/567	28/3919	0.928548	0.999974	CsaV3_7G018620/CsaV3_3G043250	CsaV3_7G018620/CsaV3_3G043250	csv:101213467/csv:101204776	2
csv04130	SNARE interactions in vesicular transport	2/567	28/3919	0.928548	0.999974	CsaV3_3G041240/CsaV3_4G002040	CsaV3_3G041240/CsaV3_4G002040	csv:101213977/csv:101207624	2
csv00450	Selenocompound metabolism	1/567	17/3919	0.930236	0.999974	CsaV3_3G006730	CsaV3_3G006730	csv:101211867	1
csv00350	Tyrosine metabolism	3/567	39/3919	0.936	0.999974	CsaV3_7G024070/CsaV3_4G033420/CsaV3_3G009690	CsaV3_7G024070/CsaV3_4G033420/CsaV3_3G009690	csv:101214429/csv:101212407/csv:101213403	3
csv03030	DNA replication	3/567	40/3919	0.942881	0.999974	CsaV3_4G003460/CsaV3_3G010270/CsaV3_1G046580	CsaV3_4G003460/CsaV3_3G010270/CsaV3_1G046580	csv:101210143/csv:101220726/csv:101208243	3
csv01230	Biosynthesis of amino acids	22/567	201/3919	0.944925	0.999974	CsaV3_2G025820/CsaV3_5G038370/CsaV3_3G002000/CsaV3_4G004200/CsaV3_6G015630/CsaV3_1G005660/CsaV3_3G049730/CsaV3_4G007440/CsaV3_2G034880/CsaV3_7G024070/CsaV3_4G028640/CsaV3_7G018620/CsaV3_4G000040/CsaV3_1G000550/CsaV3_6G048980/CsaV3_4G036570/CsaV3_1G014500/CsaV3_2G015280/CsaV3_6G031950/CsaV3_3G023460/CsaV3_2G029790/CsaV3_1G044260	CsaV3_2G025820/CsaV3_5G038370/CsaV3_3G002000/CsaV3_4G004200/CsaV3_6G015630/CsaV3_1G005660/CsaV3_3G049730/CsaV3_4G007440/CsaV3_2G034880/CsaV3_7G024070/CsaV3_4G028640/CsaV3_7G018620/CsaV3_4G000040/CsaV3_1G000550/CsaV3_6G048980/CsaV3_4G036570/CsaV3_1G014500/CsaV3_2G015280/CsaV3_6G031950/CsaV3_3G023460/CsaV3_2G029790/CsaV3_1G044260	csv:101214004/csv:101203315/csv:101216517/csv:101204973/csv:101209376/csv:101219871/csv:101212173/csv:101212892/csv:101217625/csv:101214429/csv:101215287/csv:101213467/csv:101220786/csv:101213339/csv:101209833/csv:101213051/csv:101221912/csv:101204323/csv:101210280/csv:101220704/csv:101220636/csv:101208212	22
csv00260	Glycine, serine and threonine metabolism	6/567	69/3919	0.947611	0.999974	CsaV3_1G043170/CsaV3_4G026970/CsaV3_4G007440/CsaV3_4G028640/CsaV3_6G000070/CsaV3_7G001060	CsaV3_1G043170/CsaV3_4G026970/CsaV3_4G007440/CsaV3_4G028640/CsaV3_6G000070/CsaV3_7G001060	csv:101217893/csv:101210304/csv:101212892/csv:101215287/csv:101207718/csv:101209132	6
csv00196	Photosynthesis - antenna proteins	1/567	19/3919	0.94904	0.999974	CsaV3_2G027790	CsaV3_2G027790	csv:101219846	1
csv00950	Isoquinoline alkaloid biosynthesis	1/567	20/3919	0.956449	0.999974	CsaV3_4G033420	CsaV3_4G033420	csv:101212407	1
csv03060	Protein export	3/567	43/3919	0.959621	0.999974	CsaV3_5G034760/CsaV3_2G025100/CsaV3_1G043340	CsaV3_5G034760/CsaV3_2G025100/CsaV3_1G043340	csv:101214128/csv:101205346/csv:101217111	3
csv02010	ABC transporters	1/567	22/3919	0.968196	0.999974	CsaV3_3G035990	CsaV3_3G035990	csv:101220974	1
csv00190	Oxidative phosphorylation	11/567	123/3919	0.977072	0.999974	CsaV3_5G037860/CsaV3_2G032160/CsaV3_3G026640/CsaV3_UNG207830/CsaV3_3G006950/CsaV3_6G008400/CsaV3_6G032290/CsaV3_6G025300/CsaV3_2G029310/CsaV3_UNG203710/CsaV3_UNG210140	CsaV3_5G037860/CsaV3_2G032160/CsaV3_3G026640/CsaV3_UNG207830/CsaV3_3G006950/CsaV3_6G008400/CsaV3_6G032290/CsaV3_6G025300/CsaV3_2G029310/CsaV3_UNG203710/CsaV3_UNG210140	csv:101211115/csv:101215909/csv:101211621/csv:3429379/csv:101215010/csv:101214636/csv:3429256/csv:11123862/csv:101209079/csv:3429376/csv:3429256	11
csv00073	Cutin, suberine and wax biosynthesis	1/567	25/3919	0.980159	0.999974	CsaV3_1G000360	CsaV3_1G000360	csv:101210256	1
csv04626	Plant-pathogen interaction	13/567	149/3919	0.988431	0.999974	CsaV3_3G046100/CsaV3_6G032360/CsaV3_3G017480/CsaV3_2G016880/CsaV3_7G002670/CsaV3_3G038320/CsaV3_6G051540/CsaV3_3G005100/CsaV3_5G038390/CsaV3_7G003380/CsaV3_3G005930/CsaV3_3G016500/CsaV3_6G013210	CsaV3_3G046100/CsaV3_6G032360/CsaV3_3G017480/CsaV3_2G016880/CsaV3_7G002670/CsaV3_3G038320/CsaV3_6G051540/CsaV3_3G005100/CsaV3_5G038390/CsaV3_7G003380/CsaV3_3G005930/CsaV3_3G016500/CsaV3_6G013210	csv:101211964/csv:101204301/csv:101210914/csv:101205458/csv:101212482/csv:101213335/csv:101215973/csv:101215161/csv:101203560/csv:101203576/csv:101207531/csv:101215063/csv:101205428	13
csv03440	Homologous recombination	2/567	44/3919	0.991543	0.999974	CsaV3_3G044350/CsaV3_6G022120	CsaV3_3G044350/CsaV3_6G022120	csv:101217141/csv:101212497	2
csv00904	Diterpenoid biosynthesis	1/567	31/3919	0.992287	0.999974	CsaV3_3G049380	CsaV3_3G049380	csv:101206553	1
csv03430	Mismatch repair	1/567	31/3919	0.992287	0.999974	CsaV3_6G002720	CsaV3_6G002720	csv:101211816	1
csv03420	Nucleotide excision repair	2/567	49/3919	0.995777	0.999974	CsaV3_2G026140/CsaV3_6G016240	CsaV3_2G026140/CsaV3_6G016240	csv:101209203/csv:101212319	2
csv00040	Pentose and glucuronate interconversions	8/567	114/3919	0.995808	0.999974	CsaV3_1G043310/CsaV3_1G005660/CsaV3_3G006470/CsaV3_2G015180/CsaV3_4G025310/CsaV3_5G027030/CsaV3_7G002090/CsaV3_6G034020	CsaV3_1G043310/CsaV3_1G005660/CsaV3_3G006470/CsaV3_2G015180/CsaV3_4G025310/CsaV3_5G027030/CsaV3_7G002090/CsaV3_6G034020	csv:101219793/csv:101219871/csv:101207212/csv:101207446/csv:101210436/csv:101220205/csv:101214980/csv:101202798	8
csv00220	Arginine biosynthesis	1/567	36/3919	0.996495	0.999974	CsaV3_3G044050	CsaV3_3G044050	csv:101207765	1
csv03010	Ribosome	24/567	263/3919	0.99727	0.999974	CsaV3_6G032340/CsaV3_6G002260/CsaV3_5G031430/CsaV3_3G031960/CsaV3_2G013050/CsaV3_6G032270/CsaV3_7G031930/CsaV3_1G038440/CsaV3_4G001000/CsaV3_6G039570/CsaV3_UNG208960/CsaV3_1G030220/CsaV3_4G005150/CsaV3_3G016300/CsaV3_2G032240/CsaV3_7G021070/CsaV3_3G012980/CsaV3_2G032930/CsaV3_4G000420/CsaV3_4G007890/CsaV3_4G010600/CsaV3_UNG207820/CsaV3_6G013470/CsaV3_7G024610	CsaV3_6G032340/CsaV3_6G002260/CsaV3_5G031430/CsaV3_3G031960/CsaV3_2G013050/CsaV3_6G032270/CsaV3_7G031930/CsaV3_1G038440/CsaV3_4G001000/CsaV3_6G039570/CsaV3_UNG208960/CsaV3_1G030220/CsaV3_4G005150/CsaV3_3G016300/CsaV3_2G032240/CsaV3_7G021070/CsaV3_3G012980/CsaV3_2G032930/CsaV3_4G000420/CsaV3_4G007890/CsaV3_4G010600/CsaV3_UNG207820/CsaV3_6G013470/CsaV3_7G024610	csv:101205274/csv:101217730/csv:101218512/csv:101218332/csv:101216114/csv:101206455/csv:101212927/csv:101220340/csv:101203604/csv:101216324/csv:3429316/csv:101223220/csv:101212340/csv:101209551/csv:101214306/csv:101215123/csv:101203444/csv:101216688/csv:101211861/csv:101214864/csv:3429314/csv:3429313/csv:101216644/csv:3429299	24
csv00910	Nitrogen metabolism	1/567	40/3919	0.998136	0.999974	CsaV3_3G044050	CsaV3_3G044050	csv:101207765	1
csv00520	Amino sugar and nucleotide sugar metabolism	6/567	104/3919	0.998624	0.999974	CsaV3_4G006660/CsaV3_3G009770/CsaV3_3G037280/CsaV3_5G027030/CsaV3_3G039800/CsaV3_6G034020	CsaV3_4G006660/CsaV3_3G009770/CsaV3_3G037280/CsaV3_5G027030/CsaV3_3G039800/CsaV3_6G034020	csv:101209558/csv:101215329/csv:101205054/csv:101220205/csv:101214861/csv:101202798	6
csv03050	Proteasome	1/567	42/3919	0.998641	0.999974	CsaV3_5G030400	CsaV3_5G030400	csv:101210332	1
csv00500	Starch and sucrose metabolism	9/567	137/3919	0.998902	0.999974	CsaV3_2G015270/CsaV3_3G041330/CsaV3_4G000970/CsaV3_1G044130/CsaV3_3G030250/CsaV3_3G022670/CsaV3_3G043060/CsaV3_3G046790/CsaV3_1G010680	CsaV3_2G015270/CsaV3_3G041330/CsaV3_4G000970/CsaV3_1G044130/CsaV3_3G030250/CsaV3_3G022670/CsaV3_3G043060/CsaV3_3G046790/CsaV3_1G010680	csv:101206719/csv:101213691/csv:101203847/csv:101206753/csv:101217041/csv:101217315/csv:101223112/csv:101202827/csv:101214889	9
csv00940	Phenylpropanoid biosynthesis	9/567	171/3919	0.999974	0.999974	CsaV3_3G046050/CsaV3_2G018020/CsaV3_3G004010/CsaV3_7G008380/CsaV3_2G014160/CsaV3_1G031500/CsaV3_3G015450/CsaV3_3G022670/CsaV3_3G043060	CsaV3_3G046050/CsaV3_2G018020/CsaV3_3G004010/CsaV3_7G008380/CsaV3_2G014160/CsaV3_1G031500/CsaV3_3G015450/CsaV3_3G022670/CsaV3_3G043060	csv:101213170/csv:101205228/csv:101214916/csv:101202984/csv:101209504/csv:101218077/csv:101203261/csv:101217315/csv:101223112	9

## Sheet: Circadian genes and carotenoid 
Annotation of 7 Circadian genes coexpressing with 6 Carotenoid gened in MEturquoise module of module trait WGCNA
7 Circadian Genes
CsaV3_6G043900		casein kinase II subunit alpha
CsaV3_6G008360		protein LHY-like isoform X2
CsaV3_6G015450		E3 ubiquitin-protein ligase COP1
CsaV3_6G005020		protein GIGANTEA-like
CsaV3_4G024430		two-component response regulator-like APRR7
CsaV3_5G014370		Flavin-binding kelch domain F box protein
CsaV3_2G007370		transcription factor PIF3 isoform X1
6 Carotenoid genes
CsaV3_1G045650		Zeta-carotene desaturase (ZDS)
CsaV3_3G017450		Beta-carotene hydroxylase (CHYB_1)
CsaV3_6G051790		9-cis-epoxycarotenoid dioxygenase (NCED)
CsaV3_4G002690		Phytoene desaturase (PDS)
CsaV3_4G007760		9-cis-epoxycarotenoid dioxygenase
CsaV3_2G027780		Abscisic acid 8'-hydroxylase
